# Supplementary material for: Reading the Complex Skipper Butterfly Fauna of One Tropical Place
Source: PubMed Central journal article supplement (PMC3156701; doi:10.1371/journal.pone.0019874), 2011-08-16
Supplement: pone.0019874.s001.pdf [file pone.0019874.s001.pdf]

# BOLD TaxonID Tree

Project : BOLD PROCESSDS[NO CODE]  
Date : 4-April-2011  
Data Type : Nucleotide  
Distance Model : Kimura 2 Parameter  
Codon Positions : 1st, 2nd, 3rd  
Labels : SampleID, Sequence Length,  
Filters : Length > 300  
Colorization : [blue]=Stop Codons [red]=Contamination or misidentification  
Attachment : Photographs & Spreadsheet

Sequence Count : 9397  
Species count : 356  
Genus count : 102  
Family count : 1  
Unidentified : 0

Typhedanus ampyx|[1]|95-SRNP-4704|441[2n]bp  
 Typhedanus ampyx|[2]|02-SRNP-13978|669[0n]bp  
 Typhedanus ampyx|[3]|03-SRNP-27074|669[0n]bp  
 Typhedanus ampyx|[4]|04-SRNP-15699|669[0n]bp  
 Typhedanus ampyx|[5]|02-SRNP-13972|657[1n]bp  
 Typhedanus ampyx|[6]|06-SRNP-19495|654[0n]bp  
 Typhedanus ampyx|[7]|08-SRNP-16243|669[0n]bp  
 Niconiades gladys|[8]|08-SRNP-40802|669[0n]bp  
 Niconiades gladys|[9]|08-SRNP-41006|669[0n]bp  
 Niconiades gladys|[10]|08-SRNP-41005|669[0n]bp  
 Niconiades gladys|[11]|08-SRNP-41008|669[0n]bp  
 Niconiades gladys|[12]|08-SRNP-41007|669[0n]bp  
 Niconiades gladys|[13]|07-SRNP-41299|669[0n]bp  
 Niconiades gladys|[14]|07-SRNP-40880|669[0n]bp  
 Niconiades gladys|[15]|07-SRNP-41499|669[0n]bp  
 Niconiades gladys|[16]|07-SRNP-40878|669[0n]bp  
 Niconiades gladys|[17]|07-SRNP-42460|660[0n]bp  
 Niconiades gladys|[18]|07-SRNP-41297|669[0n]bp  
 Niconiades gladys|[19]|07-SRNP-42104|669[0n]bp  
 Niconiades gladys|[20]|08-SRNP-40804|669[0n]bp  
 Niconiades gladys|[21]|08-SRNP-40803|669[0n]bp  
 Niconiades xanthaphes|[22]|07-SRNP-40674|669[0n]bp  
 Niconiades xanthaphes|[23]|08-SRNP-24219|567[0n]bp  
 Niconiades xanthaphes|[24]|04-SRNP-48297|663[0n]bp  
 Niconiades xanthaphes|[25]|09-SRNP-21365|669[0n]bp  
 Niconiades xanthaphes|[26]|09-SRNP-20105|669[0n]bp  
 Niconiades xanthaphes|[27]|07-SRNP-40588|669[0n]bp  
 Niconiades xanthaphes|[28]|06-SRNP-40704|669[0n]bp  
 Niconiades xanthaphes|[29]|08-SRNP-45150|639[0n]bp  
 Niconiades xanthaphes|[30]|07-SRNP-41908|669[0n]bp  
 Niconiades xanthaphes|[31]|07-SRNP-41909|669[0n]bp  
 Niconiades xanthaphes|[32]|06-SRNP-41203|669[0n]bp  
 Niconiades xanthaphes|[33]|04-SRNP-13906|669[0n]bp  
 Niconiades xanthaphes|[34]|04-SRNP-13942|669[0n]bp  
 Niconiades xanthaphes|[35]|04-SRNP-23563|669[0n]bp  
 Niconiades xanthaphes|[36]|01-SRNP-17553|654[0n]bp  
 Niconiades xanthaphes|[37]|02-SRNP-30345|657[0n]bp  
 Niconiades xanthaphes|[38]|04-SRNP-14330|642[0n]bp  
 Niconiades xanthaphes|[39]|08-SRNP-274|645[0n]bp  
 Niconiades xanthaphes|[40]|08-SRNP-273|645[0n]bp  
 Niconiades xanthaphes|[41]|08-SRNP-24218|669[0n]bp  
 Niconiades xanthaphes|[42]|09-SRNP-68536|669[0n]bp  
 Celaenorrhinus stallingsi|[43]|94-SRNP-569|669[0n]bp  
 Celaenorrhinus stallingsi|[44]|06-SRNP-47719|669[0n]bp  
 Celaenorrhinus stallingsi|[45]|04-SRNP-27175|669[0n]bp  
 Celaenorrhinus stallingsi|[46]|05-SRNP-48589|669[0n]bp  
 Celaenorrhinus stallingsi|[47]|04-SRNP-45627|669[0n]bp  
 Celaenorrhinus stallingsi|[48]|04-SRNP-46658|669[0n]bp  
 Celaenorrhinus stallingsi|[49]|04-SRNP-45628|669[0n]bp  
 Celaenorrhinus stallingsi|[50]|04-SRNP-45248|669[0n]bp  
 Celaenorrhinus stallingsi|[51]|04-SRNP-45054|669[0n]bp  
 Celaenorrhinus stallingsi|[52]|03-SRNP-29104|669[0n]bp  
 Celaenorrhinus stallingsi|[53]|04-SRNP-45303|669[0n]bp  
 Celaenorrhinus stallingsi|[54]|03-SRNP-29103|663[0n]bp  
 Celaenorrhinus stallingsi|[55]|02-SRNP-8079|657[0n]bp  
 Celaenorrhinus stallingsi|[56]|04-SRNP-45199|630[0n]bp  
 Celaenorrhinus stallingsi|[57]|04-SRNP-45280|648[1n]bp  
 Celaenorrhinus stallingsi|[58]|05-SRNP-24342|669[0n]bp  
 Celaenorrhinus stallingsi|[59]|07-SRNP-35248|669[0n]bp  
 Celaenorrhinus stallingsi|[60]|08-SRNP-35005|669[0n]bp  
 Celaenorrhinus stallingsi|[61]|08-SRNP-45153|669[0n]bp  
 Celaenorrhinus fritzgaertneri|[62]|07-SRNP-58872|669[0n]bp  
 Celaenorrhinus fritzgaertneri|[63]|07-SRNP-56429|669[0n]bp  
 Celaenorrhinus fritzgaertneri|[64]|05-SRNP-60702|669[0n]bp  
 Celaenorrhinus fritzgaertneri|[65]|06-SRNP-19668|669[0n]bp  
 Celaenorrhinus fritzgaertneri|[66]|04-SRNP-46882|669[0n]bp  
 Celaenorrhinus fritzgaertneri|[67]|04-SRNP-47171|669[0n]bp  
 Celaenorrhinus fritzgaertneri|[68]|93-SRNP-6905|669[0n]bp  
 Celaenorrhinus fritzgaertneri|[69]|04-SRNP-47172|669[2n]bp  
 Celaenorrhinus fritzgaertneri|[70]|93-SRNP-6145|669[0n]bp  
 Celaenorrhinus fritzgaertneri|[71]|95-SRNP-9563|399[0n]bp  
 Celaenorrhinus fritzgaertneri|[72]|05-SRNP-64117|618[0n]bp  
 Celaenorrhinus fritzgaertneri|[73]|09-SRNP-13046|669[0n]bp  
 Celaenorrhinus approximatus|[74]|03-SRNP-4049|489[1n]bp  
 Celaenorrhinus approximatus|[75]|04-SRNP-35283|669[0n]bp  
 Celaenorrhinus approximatus|[76]|04-SRNP-35231|669[0n]bp  
 Celaenorrhinus approximatus|[77]|04-SRNP-35236|669[0n]bp  
 Celaenorrhinus approximatus|[78]|04-SRNP-35375|669[0n]bp  
 Celaenorrhinus approximatus|[79]|04-SRNP-35276|669[0n]bp  
 Celaenorrhinus approximatus|[80]|04-SRNP-35243|669[0n]bp  
 Celaenorrhinus approximatus|[81]|04-SRNP-35230|669[0n]bp  
 Celaenorrhinus approximatus|[82]|04-SRNP-35247|669[0n]bp  
 Celaenorrhinus approximatus|[83]|04-SRNP-35245|669[0n]bp  
 Celaenorrhinus approximatus|[84]|04-SRNP-35242|669[0n]bp  
 Celaenorrhinus approximatus|[85]|04-SRNP-35234|669[0n]bp  
 Celaenorrhinus approximatus|[86]|04-SRNP-35239|669[0n]bp  
 Celaenorrhinus approximatus|[87]|04-SRNP-35233|669[0n]bp  
 Celaenorrhinus approximatus|[88]|04-SRNP-35235|669[0n]bp  
 Celaenorrhinus approximatus|[89]|04-SRNP-35282|669[0n]bp  
 Celaenorrhinus approximatus|[90]|04-SRNP-35280|669[0n]bp  
 Celaenorrhinus approximatus|[91]|03-SRNP-4053|642[0n]bp  
 Celaenorrhinus approximatus|[92]|04-SRNP-35281|633[0n]bp  
 Celaenorrhinus approximatus|[93]|06-SRNP-35037|669[1n]bp  
 Celaenorrhinus approximatus|[94]|07-SRNP-35584|669[0n]bp  
 Celaenorrhinus Burns03|[95]|05-SRNP-2519|669[0n]bp  
 Celaenorrhinus Burns03|[96]|06-SRNP-2390|666[0n]bp  
 Celaenorrhinus Burns03|[97]|06-SRNP-2415|669[0n]bp  
 Celaenorrhinus Burns03|[98]|06-SRNP-1475|669[0n]bp  
 Celaenorrhinus Burns03|[99]|06-SRNP-7150|669[0n]bp  
 Celaenorrhinus Burns03|[100]|05-SRNP-570|669[2n]bp

|                |         |       |               |         |    |
|----------------|---------|-------|---------------|---------|----|
| Celaenorrhinus | Burns03 | [98]  | 06-SRNP-1475  | 669[0n] | bp |
| Celaenorrhinus | Burns03 | [99]  | 06-SRNP-7150  | 669[0n] | bp |
| Celaenorrhinus | Burns03 | [100] | 05-SRNP-570   | 669[2n] | bp |
| Celaenorrhinus | Burns03 | [101] | 05-SRNP-567   | 669[0n] | bp |
| Celaenorrhinus | Burns03 | [102] | 05-SRNP-751   | 669[1n] | bp |
| Celaenorrhinus | Burns03 | [103] | 07-SRNP-1399  | 669[0n] | bp |
| Celaenorrhinus | Burns03 | [104] | 05-SRNP-6010  | 669[0n] | bp |
| Celaenorrhinus | Burns03 | [105] | 05-SRNP-5661  | 669[0n] | bp |
| Celaenorrhinus | Burns03 | [106] | 04-SRNP-26450 | 669[0n] | bp |
| Celaenorrhinus | Burns03 | [107] | 05-SRNP-1346  | 669[0n] | bp |
| Celaenorrhinus | Burns03 | [108] | 05-SRNP-569   | 669[0n] | bp |
| Celaenorrhinus | Burns03 | [109] | 04-SRNP-26452 | 669[0n] | bp |
| Celaenorrhinus | Burns03 | [110] | 05-SRNP-568   | 669[0n] | bp |
| Celaenorrhinus | Burns03 | [111] | 05-SRNP-6011  | 645[0n] | bp |
| Celaenorrhinus | Burns03 | [112] | 03-SRNP-5449  | 645[0n] | bp |
| Celaenorrhinus | Burns03 | [113] | 06-SRNP-679   | 633[0n] | bp |
| Celaenorrhinus | Burns03 | [114] | 06-SRNP-1485  | 669[0n] | bp |
| Celaenorrhinus | Burns03 | [115] | 05-SRNP-2378  | 567[0n] | bp |
| Celaenorrhinus | Burns03 | [116] | 05-SRNP-752   | 606[0n] | bp |
| Celaenorrhinus | Burns03 | [117] | 05-SRNP-6009  | 618[0n] | bp |
| Celaenorrhinus | Burns03 | [118] | 05-SRNP-5819  | 618[0n] | bp |
| Celaenorrhinus | Burns03 | [119] | 07-SRNP-609   | 663[0n] | bp |
| Celaenorrhinus | Burns03 | [120] | 07-SRNP-1398  | 669[0n] | bp |
| Celaenorrhinus | Burns03 | [121] | 07-SRNP-1659  | 669[0n] | bp |
| Celaenorrhinus | Burns03 | [122] | 07-SRNP-1478  | 669[0n] | bp |
| Celaenorrhinus | eligius | [123] | 07-SRNP-21870 | 669[0n] | bp |
| Celaenorrhinus | eligius | [124] | 05-SRNP-34575 | 669[0n] | bp |
| Celaenorrhinus | eligius | [125] | 07-SRNP-23595 | 669[0n] | bp |
| Celaenorrhinus | eligius | [126] | 07-SRNP-770   | 669[0n] | bp |
| Celaenorrhinus | eligius | [127] | 07-SRNP-580   | 669[0n] | bp |
| Celaenorrhinus | eligius | [128] | 06-SRNP-59174 | 669[0n] | bp |
| Celaenorrhinus | eligius | [129] | 06-SRNP-1045  | 669[0n] | bp |
| Celaenorrhinus | eligius | [130] | 06-SRNP-1044  | 669[0n] | bp |
| Celaenorrhinus | eligius | [131] | 05-SRNP-31037 | 669[0n] | bp |
| Celaenorrhinus | eligius | [132] | 97-SRNP-11551 | 669[0n] | bp |
| Celaenorrhinus | eligius | [133] | 98-SRNP-6383  | 669[0n] | bp |
| Celaenorrhinus | eligius | [134] | 04-SRNP-32649 | 669[0n] | bp |
| Celaenorrhinus | eligius | [135] | 04-SRNP-45100 | 627[0n] | bp |
| Celaenorrhinus | eligius | [136] | 07-SRNP-60093 | 660[0n] | bp |
| Celaenorrhinus | eligius | [137] | 08-SRNP-65084 | 654[1n] | bp |
| Celaenorrhinus | eligius | [138] | 07-SRNP-24063 | 636[0n] | bp |
| Celaenorrhinus | eligius | [139] | 08-SRNP-703   | 669[0n] | bp |
| Celaenorrhinus | eligius | [140] | 06-SRNP-2608  | 669[0n] | bp |
| Celaenorrhinus | eligius | [141] | 07-SRNP-24053 | 669[0n] | bp |
| Celaenorrhinus | eligius | [142] | 06-SRNP-9991  | 669[0n] | bp |
| Celaenorrhinus | eligius | [143] | 07-SRNP-55146 | 669[0n] | bp |
| Celaenorrhinus | eligius | [144] | 05-SRNP-20010 | 669[0n] | bp |
| Celaenorrhinus | eligius | [145] | 06-SRNP-45187 | 669[0n] | bp |
| Celaenorrhinus | eligius | [146] | 06-SRNP-45188 | 669[0n] | bp |
| Celaenorrhinus | eligius | [147] | 06-SRNP-586   | 669[0n] | bp |
| Celaenorrhinus | eligius | [148] | 05-SRNP-48036 | 669[0n] | bp |
| Celaenorrhinus | eligius | [149] | 04-SRNP-21218 | 669[0n] | bp |
| Celaenorrhinus | eligius | [150] | 06-SRNP-1795  | 633[0n] | bp |
| Celaenorrhinus | eligius | [151] | 02-SRNP-4737  | 657[0n] | bp |
| Celaenorrhinus | eligius | [152] | 04-SRNP-30412 | 645[0n] | bp |
| Celaenorrhinus | eligius | [153] | 04-SRNP-45098 | 648[0n] | bp |
| Celaenorrhinus | eligius | [154] | 06-SRNP-59205 | 618[0n] | bp |
| Celaenorrhinus | eligius | [155] | 06-SRNP-59204 | 624[0n] | bp |
| Celaenorrhinus | eligius | [156] | 04-SRNP-412   | 615[0n] | bp |
| Celaenorrhinus | eligius | [157] | 95-SRNP-9367  | 396[0n] | bp |
| Celaenorrhinus | eligius | [158] | 06-SRNP-47652 | 600[0n] | bp |
| Celaenorrhinus | eligius | [159] | 08-SRNP-55519 | 639[0n] | bp |
| Celaenorrhinus | eligius | [160] | 08-SRNP-65085 | 669[0n] | bp |
| Celaenorrhinus | eligius | [161] | 08-SRNP-1523  | 669[0n] | bp |
| Celaenorrhinus | eligius | [162] | 08-SRNP-702   | 669[0n] | bp |
| Celaenorrhinus | eligius | [163] | 08-SRNP-1062  | 669[0n] | bp |
| Celaenorrhinus | eligius | [164] | 08-SRNP-24026 | 669[0n] | bp |
| Celaenorrhinus | Burns01 | [165] | 07-SRNP-322   | 669[0n] | bp |
| Celaenorrhinus | Burns01 | [166] | 06-SRNP-34867 | 669[0n] | bp |
| Celaenorrhinus | Burns01 | [167] | 04-SRNP-31134 | 573[0n] | bp |
| Celaenorrhinus | Burns01 | [168] | 07-SRNP-2116  | 669[0n] | bp |
| Celaenorrhinus | Burns01 | [169] | 06-SRNP-7072  | 669[0n] | bp |
| Celaenorrhinus | Burns01 | [170] | 06-SRNP-43466 | 669[0n] | bp |
| Celaenorrhinus | Burns01 | [171] | 05-SRNP-30928 | 669[0n] | bp |
| Celaenorrhinus | Burns01 | [172] | 04-SRNP-26417 | 669[0n] | bp |
| Celaenorrhinus | Burns01 | [173] | 04-SRNP-26244 | 669[0n] | bp |
| Celaenorrhinus | Burns01 | [174] | 05-SRNP-1753  | 669[0n] | bp |
| Celaenorrhinus | Burns01 | [175] | 04-SRNP-1521  | 669[0n] | bp |
| Celaenorrhinus | Burns01 | [176] | 04-SRNP-26070 | 669[1n] | bp |
| Celaenorrhinus | Burns01 | [177] | 05-SRNP-31094 | 669[1n] | bp |
| Celaenorrhinus | Burns01 | [178] | 06-SRNP-31079 | 666[0n] | bp |
| Celaenorrhinus | Burns01 | [179] | 00-SRNP-20678 | 624[0n] | bp |
| Celaenorrhinus | Burns01 | [180] | 07-SRNP-1746  | 645[0n] | bp |
| Celaenorrhinus | Burns01 | [181] | 07-SRNP-3335  | 660[0n] | bp |
| Celaenorrhinus | Burns01 | [182] | 07-SRNP-66148 | 669[0n] | bp |
| Celaenorrhinus | Burns01 | [183] | 08-SRNP-1552  | 669[0n] | bp |
| Celaenorrhinus | Burns01 | [184] | 08-SRNP-31104 | 669[0n] | bp |
| Celaenorrhinus | Burns01 | [185] | 08-SRNP-4324  | 669[0n] | bp |
| Celaenorrhinus | Burns01 | [186] | 08-SRNP-1270  | 669[0n] | bp |
| Celaenorrhinus | Burns01 | [187] | 08-SRNP-32133 | 669[2n] | bp |
| Celaenorrhinus | Burns01 | [188] | 09-SRNP-56693 | 669[1n] | bp |
| Celaenorrhinus | Burns01 | [189] | 05-SRNP-33241 | 669[0n] | bp |
| Celaenorrhinus | Burns01 | [190] | 05-SRNP-6400  | 669[0n] | bp |
| Celaenorrhinus | Burns01 | [191] | 06-SRNP-43399 | 669[0n] | bp |
| Celaenorrhinus | Burns01 | [192] | 05-SRNP-5759  | 669[0n] | bp |
| Celaenorrhinus | Burns01 | [193] | 05-SRNP-1850  | 669[0n] | bp |
| Celaenorrhinus | Burns01 | [194] | 05-SRNP-1852  | 669[0n] | bp |
| Celaenorrhinus | Burns01 | [195] | 04-SRNP-1512  | 669[0n] | bp |
| Celaenorrhinus | Burns01 | [196] | 04-SRNP-1743  | 669[0n] | bp |
| Celaenorrhinus | Burns01 | [197] | 04-SRNP-40721 | 669[0n] | bp |
| Celaenorrhinus | Burns01 | [198] | 04-SRNP-33215 | 669[0n] | bp |
| Celaenorrhinus | Burns01 | [199] | 04-SRNP-30415 | 669[0n] | bp |
| Celaenorrhinus | Burns01 | [200] | 04-SRNP-30592 | 669[0n] | bp |

|                      |         |       |               |     |      |    |
|----------------------|---------|-------|---------------|-----|------|----|
| Celaenorrhinus       | Burns01 | [198] | 04-SRNP-33215 | 669 | [0n] | bp |
| Celaenorrhinus       | Burns01 | [199] | 04-SRNP-30415 | 669 | [0n] | bp |
| Celaenorrhinus       | Burns01 | [200] | 04-SRNP-30592 | 669 | [0n] | bp |
| Celaenorrhinus       | Burns01 | [201] | 05-SRNP-976   | 669 | [4n] | bp |
| Celaenorrhinus       | Burns01 | [202] | 05-SRNP-30880 | 669 | [1n] | bp |
| Celaenorrhinus       | Burns01 | [203] | 07-SRNP-3289  | 660 | [1n] | bp |
| Celaenorrhinus       | Burns01 | [204] | 02-SRNP-27941 | 660 | [0n] | bp |
| Celaenorrhinus       | Burns01 | [205] | 07-SRNP-2663  | 645 | [0n] | bp |
| Celaenorrhinus       | Burns01 | [206] | 07-SRNP-2535  | 645 | [0n] | bp |
| Celaenorrhinus       | Burns01 | [207] | 05-SRNP-5758  | 642 | [1n] | bp |
| Celaenorrhinus       | Burns01 | [208] | 07-SRNP-3397  | 660 | [0n] | bp |
| Celaenorrhinus       | Burns01 | [209] | 07-SRNP-3148  | 660 | [0n] | bp |
| Celaenorrhinus       | Burns01 | [210] | 07-SRNP-2970  | 666 | [0n] | bp |
| Celaenorrhinus       | Burns01 | [211] | 07-SRNP-3214  | 660 | [1n] | bp |
| Celaenorrhinus       | Burns01 | [212] | 07-SRNP-30343 | 669 | [0n] | bp |
| Celaenorrhinus       | Burns01 | [213] | 08-SRNP-2417  | 669 | [0n] | bp |
| Celaenorrhinus       | Burns01 | [214] | 08-SRNP-1521  | 669 | [0n] | bp |
| Celaenorrhinus       | Burns01 | [215] | 08-SRNP-32287 | 669 | [0n] | bp |
| Celaenorrhinus       | Burns01 | [216] | 08-SRNP-72595 | 669 | [0n] | bp |
| Celaenorrhinus       | Burns01 | [217] | 08-SRNP-72651 | 669 | [0n] | bp |
| Celaenorrhinus       | Burns01 | [218] | 09-SRNP-65032 | 669 | [0n] | bp |
| Celaenorrhinus       | Burns01 | [219] | 09-SRNP-57269 | 669 | [0n] | bp |
| Celaenorrhinus       | Burns01 | [220] | 09-SRNP-69994 | 669 | [0n] | bp |
| Celaenorrhinus       | Burns01 | [221] | 09-SRNP-68526 | 669 | [0n] | bp |
| Polythrix mexicanus  |         | [222] | 02-SRNP-13621 | 669 | [0n] | bp |
| Polythrix mexicanus  |         | [223] | 02-SRNP-13008 | 669 | [0n] | bp |
| Polythrix mexicanus  |         | [224] | 92-SRNP-5352  | 669 | [0n] | bp |
| Polythrix mexicanus  |         | [225] | 93-SRNP-4855  | 609 | [0n] | bp |
| Polythrix mexicanus  |         | [226] | 93-SRNP-3545  | 618 | [0n] | bp |
| Polythrix mexicanus  |         | [227] | 92-SRNP-5324  | 669 | [0n] | bp |
| Polythrix mexicanus  |         | [228] | 92-SRNP-5274  | 669 | [0n] | bp |
| Polythrix mexicanus  |         | [229] | 93-SRNP-4630  | 669 | [0n] | bp |
| Polythrix mexicanus  |         | [230] | 94-SRNP-5238  | 669 | [0n] | bp |
| Polythrix mexicanus  |         | [231] | 93-SRNP-4636  | 669 | [0n] | bp |
| Polythrix mexicanus  |         | [232] | 01-SRNP-12021 | 615 | [0n] | bp |
| Polythrix mexicanus  |         | [233] | 92-SRNP-4357  | 663 | [0n] | bp |
| Polythrix mexicanus  |         | [234] | 01-SRNP-12023 | 576 | [0n] | bp |
| Polythrix mexicanus  |         | [235] | 92-SRNP-5323  | 579 | [2n] | bp |
| Polythrix mexicanus  |         | [236] | 92-SRNP-4305  | 609 | [0n] | bp |
| Polythrix mexicanus  |         | [237] | 97-SRNP-3333  | 669 | [0n] | bp |
| Polythrix mexicanus  |         | [238] | 02-SRNP-32034 | 669 | [0n] | bp |
| Polythrix mexicanus  |         | [239] | 02-SRNP-10227 | 669 | [0n] | bp |
| Polythrix mexicanus  |         | [240] | 02-SRNP-13108 | 669 | [0n] | bp |
| Polythrix mexicanus  |         | [241] | 02-SRNP-13603 | 669 | [0n] | bp |
| Polythrix mexicanus  |         | [242] | 02-SRNP-13105 | 669 | [0n] | bp |
| Polythrix mexicanus  |         | [243] | 02-SRNP-13009 | 669 | [0n] | bp |
| Polythrix mexicanus  |         | [244] | 02-SRNP-13010 | 669 | [0n] | bp |
| Polythrix mexicanus  |         | [245] | 02-SRNP-13536 | 669 | [0n] | bp |
| Polythrix mexicanus  |         | [246] | 02-SRNP-32036 | 669 | [0n] | bp |
| Polythrix mexicanus  |         | [247] | 02-SRNP-13220 | 669 | [0n] | bp |
| Polythrix mexicanus  |         | [248] | 07-SRNP-12114 | 669 | [0n] | bp |
| Polythrix mexicanus  |         | [249] | 07-SRNP-14671 | 669 | [0n] | bp |
| Polythrix asineDHJ04 |         | [250] | 04-SRNP-48896 | 669 | [0n] | bp |
| Polythrix asineDHJ04 |         | [251] | 06-SRNP-43437 | 669 | [0n] | bp |
| Polythrix asineDHJ02 |         | [252] | 09-SRNP-156   | 306 | [0n] | bp |
| Polythrix asineDHJ01 |         | [253] | 00-SRNP-6383  | 669 | [0n] | bp |
| Polythrix asineDHJ01 |         | [254] | 00-SRNP-6384  | 606 | [0n] | bp |
| Polythrix asineDHJ01 |         | [255] | 98-SRNP-4268  | 603 | [0n] | bp |
| Polythrix asineDHJ01 |         | [256] | 05-SRNP-24590 | 624 | [0n] | bp |
| Polythrix asineDHJ01 |         | [257] | 00-SRNP-6488  | 615 | [0n] | bp |
| Polythrix asineDHJ01 |         | [258] | 05-SRNP-59384 | 669 | [1n] | bp |
| Polythrix asineDHJ01 |         | [259] | 99-SRNP-18818 | 615 | [0n] | bp |
| Polythrix asineDHJ01 |         | [260] | 00-SRNP-7383  | 669 | [1n] | bp |
| Polythrix asineDHJ01 |         | [261] | 07-SRNP-12113 | 669 | [0n] | bp |
| Polythrix asineDHJ01 |         | [262] | 06-SRNP-46863 | 669 | [0n] | bp |
| Polythrix asineDHJ01 |         | [263] | 06-SRNP-46862 | 669 | [0n] | bp |
| Polythrix asineDHJ01 |         | [264] | 00-SRNP-6220  | 669 | [0n] | bp |
| Polythrix asineDHJ01 |         | [265] | 97-SRNP-3760  | 669 | [0n] | bp |
| Polythrix asineDHJ01 |         | [266] | 99-SRNP-6116  | 669 | [0n] | bp |
| Polythrix asineDHJ01 |         | [267] | 00-SRNP-6415  | 669 | [0n] | bp |
| Polythrix asineDHJ01 |         | [268] | 00-SRNP-6824  | 669 | [0n] | bp |
| Polythrix asineDHJ01 |         | [269] | 00-SRNP-6382  | 669 | [0n] | bp |
| Polythrix asineDHJ01 |         | [270] | 03-SRNP-764   | 669 | [0n] | bp |
| Polythrix asineDHJ01 |         | [271] | 02-SRNP-10287 | 669 | [0n] | bp |
| Polythrix asineDHJ01 |         | [272] | 02-SRNP-10302 | 669 | [0n] | bp |
| Polythrix asineDHJ01 |         | [273] | 02-SRNP-10070 | 669 | [0n] | bp |
| Polythrix asineDHJ01 |         | [274] | 02-SRNP-17485 | 669 | [0n] | bp |
| Polythrix asineDHJ01 |         | [275] | 02-SRNP-32959 | 669 | [0n] | bp |
| Polythrix asineDHJ01 |         | [276] | 01-SRNP-12146 | 669 | [0n] | bp |
| Polythrix asineDHJ01 |         | [277] | 95-SRNP-9068  | 669 | [0n] | bp |
| Polythrix asineDHJ01 |         | [278] | 06-SRNP-12613 | 669 | [0n] | bp |
| Polythrix asineDHJ01 |         | [279] | 04-SRNP-13416 | 669 | [0n] | bp |
| Polythrix asineDHJ01 |         | [280] | 04-SRNP-16090 | 669 | [0n] | bp |
| Polythrix asineDHJ01 |         | [281] | 04-SRNP-14315 | 669 | [0n] | bp |
| Polythrix asineDHJ01 |         | [282] | 98-SRNP-4421  | 669 | [0n] | bp |
| Polythrix asineDHJ01 |         | [283] | 04-SRNP-21571 | 669 | [0n] | bp |
| Polythrix asineDHJ01 |         | [284] | 04-SRNP-21230 | 669 | [0n] | bp |
| Polythrix asineDHJ01 |         | [285] | 04-SRNP-21464 | 669 | [0n] | bp |
| Polythrix asineDHJ01 |         | [286] | 04-SRNP-21224 | 669 | [0n] | bp |
| Polythrix asineDHJ01 |         | [287] | 04-SRNP-21232 | 669 | [0n] | bp |
| Polythrix asineDHJ01 |         | [288] | 00-SRNP-6108  | 642 | [0n] | bp |
| Polythrix asineDHJ01 |         | [289] | 95-SRNP-818   | 621 | [1n] | bp |
| Polythrix asineDHJ01 |         | [290] | 92-SRNP-4290  | 627 | [0n] | bp |
| Polythrix asineDHJ01 |         | [291] | 03-SRNP-765   | 624 | [0n] | bp |
| Polythrix asineDHJ01 |         | [292] | 06-SRNP-55628 | 603 | [0n] | bp |
| Polythrix asineDHJ01 |         | [293] | 96-SRNP-177   | 627 | [2n] | bp |
| Polythrix asineDHJ01 |         | [294] | 00-SRNP-6015  | 636 | [0n] | bp |
| Polythrix asineDHJ01 |         | [295] | 95-SRNP-817   | 585 | [0n] | bp |
| Polythrix asineDHJ01 |         | [296] | 98-SRNP-4202  | 582 | [0n] | bp |
| Polythrix asineDHJ01 |         | [297] | 97-SRNP-3720  | 600 | [0n] | bp |
| Polythrix asineDHJ01 |         | [298] | 93-SRNP-3748  | 600 | [0n] | bp |
| Polythrix asineDHJ01 |         | [299] | 93-SRNP-4295  | 615 | [0n] | bp |
| Polythrix asineDHJ01 |         | [300] | 07-SRNP-3078  | 606 | [0n] | bp |

|                      |       |               |           |
|----------------------|-------|---------------|-----------|
| Polythrix asineDHJ01 | [298] | 93-SRNP-3748  | 600[0n]bp |
| Polythrix asineDHJ01 | [299] | 93-SRNP-4295  | 615[0n]bp |
| Polythrix asineDHJ01 | [300] | 97-SRNP-3979  | 606[0n]bp |
| Polythrix asineDHJ01 | [301] | 96-SRNP-10668 | 582[0n]bp |
| Polythrix asineDHJ01 | [302] | 97-SRNP-4088  | 582[0n]bp |
| Polythrix asineDHJ01 | [303] | 00-SRNP-6491  | 609[0n]bp |
| Polythrix asineDHJ01 | [304] | 91-SRNP-1631  | 606[0n]bp |
| Polythrix asineDHJ01 | [305] | 91-SRNP-784   | 606[0n]bp |
| Polythrix asineDHJ01 | [306] | 00-SRNP-6954  | 606[0n]bp |
| Polythrix asineDHJ01 | [307] | 99-SRNP-2390  | 606[0n]bp |
| Polythrix asineDHJ01 | [308] | 93-SRNP-124   | 606[0n]bp |
| Polythrix asineDHJ01 | [309] | 94-SRNP-567   | 606[0n]bp |
| Polythrix asineDHJ01 | [310] | 93-SRNP-4312  | 606[0n]bp |
| Polythrix asineDHJ01 | [311] | 93-SRNP-4696  | 606[0n]bp |
| Polythrix asineDHJ01 | [312] | 93-SRNP-3899  | 606[0n]bp |
| Polythrix asineDHJ01 | [313] | 93-SRNP-8053  | 606[0n]bp |
| Polythrix asineDHJ01 | [314] | 93-SRNP-4515  | 606[0n]bp |
| Polythrix asineDHJ01 | [315] | 07-SRNP-56773 | 642[0n]bp |
| Polythrix asineDHJ01 | [316] | 08-SRNP-21481 | 669[0n]bp |
| Polythrix asineDHJ01 | [317] | 07-SRNP-12456 | 669[0n]bp |
| Polythrix asineDHJ01 | [318] | 07-SRNP-12455 | 669[0n]bp |
| Polythrix asineDHJ01 | [319] | 02-SRNP-19815 | 669[0n]bp |
| Polythrix asineDHJ01 | [320] | 92-SRNP-4286  | 606[0n]bp |
| Polythrix asineDHJ01 | [321] | 05-SRNP-34180 | 522[1n]bp |
| Polythrix asineDHJ01 | [322] | 04-SRNP-14104 | 555[0n]bp |
| Polythrix asineDHJ01 | [323] | 06-SRNP-12714 | 669[0n]bp |
| Polythrix asineDHJ01 | [324] | 96-SRNP-8726  | 669[0n]bp |
| Polythrix asineDHJ01 | [325] | 00-SRNP-6183  | 642[0n]bp |
| Polythrix asineDHJ01 | [326] | 00-SRNP-6737  | 642[0n]bp |
| Polythrix asineDHJ01 | [327] | 01-SRNP-12057 | 618[1n]bp |
| Polythrix asineDHJ01 | [328] | 01-SRNP-12044 | 633[0n]bp |
| Polythrix asineDHJ01 | [329] | 05-SRNP-5142  | 636[1n]bp |
| Polythrix asineDHJ01 | [330] | 96-SRNP-10264 | 609[0n]bp |
| Polythrix asineDHJ01 | [331] | 01-SRNP-12145 | 513[1n]bp |
| Polythrix asineDHJ01 | [332] | 96-SRNP-8830  | 606[0n]bp |
| Polythrix asineDHJ01 | [333] | 93-SRNP-4232  | 606[0n]bp |
| Polythrix asineDHJ01 | [334] | 08-SRNP-2029  | 669[0n]bp |
| Polythrix asineDHJ01 | [335] | 94-SRNP-7830  | 669[0n]bp |
| Polythrix asineDHJ01 | [336] | 95-SRNP-9644  | 669[0n]bp |
| Polythrix asineDHJ01 | [337] | 93-SRNP-4695  | 669[0n]bp |
| Polythrix asineDHJ01 | [338] | 93-SRNP-3926  | 669[0n]bp |
| Polythrix asineDHJ01 | [339] | 00-SRNP-6613  | 669[0n]bp |
| Polythrix asineDHJ01 | [340] | 00-SRNP-6394  | 669[0n]bp |
| Polythrix asineDHJ01 | [341] | 01-SRNP-12359 | 669[0n]bp |
| Polythrix asineDHJ01 | [342] | 02-SRNP-10304 | 669[0n]bp |
| Polythrix asineDHJ01 | [343] | 03-SRNP-29556 | 669[0n]bp |
| Polythrix asineDHJ01 | [344] | 03-SRNP-777   | 669[0n]bp |
| Polythrix asineDHJ01 | [345] | 00-SRNP-6487  | 669[0n]bp |
| Polythrix asineDHJ01 | [346] | 00-SRNP-6367  | 669[0n]bp |
| Polythrix asineDHJ01 | [347] | 00-SRNP-6497  | 669[0n]bp |
| Polythrix asineDHJ01 | [348] | 00-SRNP-6494  | 669[0n]bp |
| Polythrix asineDHJ01 | [349] | 00-SRNP-6395  | 669[0n]bp |
| Polythrix asineDHJ01 | [350] | 01-SRNP-18701 | 669[0n]bp |
| Polythrix asineDHJ01 | [351] | 00-SRNP-6700  | 669[0n]bp |
| Polythrix asineDHJ01 | [352] | 07-SRNP-20846 | 669[0n]bp |
| Polythrix asineDHJ01 | [353] | 07-SRNP-57195 | 669[0n]bp |
| Polythrix asineDHJ01 | [354] | 08-SRNP-56049 | 669[0n]bp |
| Polythrix asineDHJ01 | [355] | 08-SRNP-24005 | 669[0n]bp |
| Polythrix asineDHJ02 | [356] | 00-SRNP-6701  | 600[0n]bp |
| Polythrix asineDHJ02 | [357] | 01-SRNP-17366 | 669[0n]bp |
| Polythrix asineDHJ02 | [358] | 00-SRNP-6215  | 669[0n]bp |
| Polythrix asineDHJ02 | [359] | 02-SRNP-13219 | 669[0n]bp |
| Polythrix asineDHJ02 | [360] | 02-SRNP-10303 | 669[0n]bp |
| Polythrix asineDHJ02 | [361] | 98-SRNP-4205  | 621[0n]bp |
| Polythrix asineDHJ02 | [362] | 93-SRNP-3543  | 618[0n]bp |
| Polythrix asineDHJ02 | [363] | 94-SRNP-5275  | 606[0n]bp |
| Polythrix asineDHJ02 | [364] | 92-SRNP-204   | 606[0n]bp |
| Polythrix asineDHJ02 | [365] | 96-SRNP-957   | 606[0n]bp |
| Polythrix asineDHJ02 | [366] | 08-SRNP-2064  | 669[0n]bp |
| Polythrix asineDHJ02 | [367] | 00-SRNP-6572  | 669[0n]bp |
| Polythrix asineDHJ02 | [368] | 00-SRNP-6495  | 669[0n]bp |
| Polythrix asineDHJ02 | [369] | 07-SRNP-55549 | 669[0n]bp |
| Polythrix asineDHJ02 | [370] | 99-SRNP-6082  | 669[0n]bp |
| Polythrix asineDHJ02 | [371] | 99-SRNP-6074  | 669[0n]bp |
| Polythrix asineDHJ02 | [372] | 00-SRNP-6949  | 669[0n]bp |
| Polythrix asineDHJ02 | [373] | 00-SRNP-7137  | 669[0n]bp |
| Polythrix asineDHJ02 | [374] | 03-SRNP-18566 | 669[0n]bp |
| Polythrix asineDHJ02 | [375] | 03-SRNP-14435 | 669[0n]bp |
| Polythrix asineDHJ02 | [376] | 02-SRNP-32223 | 669[0n]bp |
| Polythrix asineDHJ02 | [377] | 00-SRNP-3211  | 669[0n]bp |
| Polythrix asineDHJ02 | [378] | 94-SRNP-710   | 669[0n]bp |
| Polythrix asineDHJ02 | [379] | 02-SRNP-10034 | 591[0n]bp |
| Polythrix asineDHJ02 | [380] | 97-SRNP-3363  | 582[0n]bp |
| Polythrix asineDHJ02 | [381] | 00-SRNP-6388  | 669[0n]bp |
| Polythrix asineDHJ02 | [382] | 00-SRNP-6950  | 606[0n]bp |
| Polythrix asineDHJ02 | [383] | 05-SRNP-61346 | 633[0n]bp |
| Polythrix asineDHJ02 | [384] | 94-SRNP-711   | 585[0n]bp |
| Polythrix asineDHJ02 | [385] | 05-SRNP-59292 | 633[2n]bp |
| Polythrix asineDHJ02 | [386] | 93-SRNP-3930  | 612[0n]bp |
| Polythrix asineDHJ02 | [387] | 93-SRNP-3398  | 606[0n]bp |
| Polythrix asineDHJ02 | [388] | 92-SRNP-5429  | 609[0n]bp |
| Polythrix asineDHJ02 | [389] | 91-SRNP-167   | 609[0n]bp |
| Polythrix asineDHJ02 | [390] | 92-SRNP-4524  | 606[0n]bp |
| Polythrix asineDHJ02 | [391] | 94-SRNP-699   | 618[1n]bp |
| Polythrix asineDHJ02 | [392] | 08-SRNP-56062 | 669[0n]bp |
| Polythrix asineDHJ02 | [393] | 08-SRNP-14903 | 669[0n]bp |
| Polythrix asineDHJ02 | [394] | 02-SRNP-10068 | 669[0n]bp |
| Polythrix asineDHJ02 | [395] | 01-SRNP-12056 | 669[0n]bp |
| Polythrix asineDHJ02 | [396] | 04-SRNP-21235 | 669[0n]bp |
| Polythrix asineDHJ02 | [397] | 93-SRNP-4231  | 606[0n]bp |
| Polythrix asineDHJ02 | [398] | 07-SRNP-55640 | 642[0n]bp |
| Polythrix asineDHJ02 | [399] | 93-SRNP-4239  | 606[0n]bp |
| Polythrix asineDHJ02 | [400] | 98-SRNP-6118  | 669[0n]bp |

|           |            |       |                  |      |      |    |
|-----------|------------|-------|------------------|------|------|----|
| Polythrix | asineDHJ02 | [398] | 07-SRNP-55640    | 642  | [0n] | bp |
| Polythrix | asineDHJ02 | [399] | 93-SRNP-4239     | 606  | [0n] | bp |
| Polythrix | asineDHJ02 | [400] | 99-SRNP-6119     | 669  | [0n] | bp |
| Polythrix | asineDHJ02 | [401] | 00-SRNP-7038     | 669  | [0n] | bp |
| Polythrix | asineDHJ02 | [402] | 93-SRNP-6115     | 567  | [0n] | bp |
| Polythrix | asineDHJ02 | [403] | 92-SRNP-5030     | 609  | [0n] | bp |
| Polythrix | asineDHJ02 | [404] | 93-SRNP-3635     | 621  | [1n] | bp |
| Polythrix | asineDHJ02 | [405] | 97-SRNP-3311     | 606  | [0n] | bp |
| Polythrix | asineDHJ02 | [406] | 08-SRNP-21270    | 669  | [0n] | bp |
| Polythrix | asineDHJ02 | [407] | 90-SRNP-2362     | 606  | [0n] | bp |
| Polythrix | asineDHJ02 | [408] | 03-SRNP-151      | 606  | [0n] | bp |
| Polythrix | asineDHJ02 | [409] | 01-SRNP-17146    | 606  | [0n] | bp |
| Polythrix | asineDHJ02 | [410] | 00-SRNP-7129     | 669  | [0n] | bp |
| Polythrix | asineDHJ02 | [411] | 00-SRNP-2525     | 633  | [0n] | bp |
| Polythrix | asineDHJ02 | [412] | 97-SRNP-5334     | 594  | [0n] | bp |
| Polythrix | asineDHJ02 | [413] | 91-SRNP-2264     | 606  | [0n] | bp |
| Polythrix | asineDHJ02 | [414] | 96-SRNP-10685    | 606  | [0n] | bp |
| Polythrix | asineDHJ02 | [415] | 07-SRNP-56772    | 669  | [0n] | bp |
| Polythrix | asineDHJ02 | [416] | 00-SRNP-20213    | 669  | [1n] | bp |
| Polythrix | asineDHJ02 | [417] | 03-SRNP-949      | 669  | [0n] | bp |
| Polythrix | asineDHJ02 | [418] | 01-SRNP-18761    | 669  | [0n] | bp |
| Polythrix | asineDHJ02 | [419] | 03-SRNP-25832    | 669  | [0n] | bp |
| Polythrix | asineDHJ02 | [420] | 99-SRNP-6164     | 558  | [1n] | bp |
| Polythrix | asineDHJ02 | [421] | 01-SRNP-12169    | 615  | [0n] | bp |
| Polythrix | asineDHJ02 | [422] | 00-SRNP-7100     | 579  | [0n] | bp |
| Polythrix | asineDHJ02 | [423] | 00-SRNP-2164     | 579  | [0n] | bp |
| Polythrix | asineDHJ02 | [424] | 97-SRNP-10070    | 618  | [0n] | bp |
| Polythrix | asineDHJ02 | [425] | 07-SRNP-55609    | 669  | [0n] | bp |
| Polythrix | asineDHJ02 | [426] | 06-SRNP-47913    | 669  | [0n] | bp |
| Polythrix | asineDHJ02 | [427] | 00-SRNP-2609     | 669  | [0n] | bp |
| Polythrix | asineDHJ02 | [428] | 00-SRNP-17652    | 669  | [0n] | bp |
| Polythrix | asineDHJ02 | [429] | 00-SRNP-6951     | 669  | [0n] | bp |
| Polythrix | asineDHJ02 | [430] | 00-SRNP-6013     | 669  | [0n] | bp |
| Polythrix | asineDHJ02 | [431] | 00-SRNP-6014     | 669  | [0n] | bp |
| Polythrix | asineDHJ02 | [432] | 03-SRNP-678      | 669  | [0n] | bp |
| Polythrix | asineDHJ02 | [433] | 03-SRNP-14568    | 669  | [0n] | bp |
| Polythrix | asineDHJ02 | [434] | 03-SRNP-155      | 669  | [0n] | bp |
| Polythrix | asineDHJ02 | [435] | 02-SRNP-32221    | 669  | [0n] | bp |
| Polythrix | asineDHJ02 | [436] | 02-SRNP-5741     | 669  | [0n] | bp |
| Polythrix | asineDHJ02 | [437] | 01-SRNP-16459    | 669  | [0n] | bp |
| Polythrix | asineDHJ02 | [438] | 02-SRNP-13312    | 669  | [0n] | bp |
| Polythrix | asineDHJ02 | [439] | 06-SRNP-21342    | 669  | [0n] | bp |
| Polythrix | asineDHJ02 | [440] | 06-SRNP-12614    | 669  | [0n] | bp |
| Polythrix | asineDHJ02 | [441] | 05-SRNP-64404    | 669  | [0n] | bp |
| Polythrix | asineDHJ02 | [442] | 04-SRNP-14469    | 669  | [0n] | bp |
| Polythrix | asineDHJ02 | [443] | 04-SRNP-45139    | 669  | [0n] | bp |
| Polythrix | asineDHJ02 | [444] | 04-SRNP-2256     | 669  | [0n] | bp |
| Polythrix | asineDHJ02 | [445] | 00-SRNP-6483     | 612  | [0n] | bp |
| Polythrix | asineDHJ02 | [446] | 05-SRNP-21368    | 669  | [4n] | bp |
| Polythrix | asineDHJ02 | [447] | 93-SRNP-4178     | 627  | [2n] | bp |
| Polythrix | asineDHJ02 | [448] | 92-SRNP-5058     | 561  | [0n] | bp |
| Polythrix | asineDHJ02 | [449] | 05-SRNP-4485     | 669  | [6n] | bp |
| Polythrix | asineDHJ02 | [450] | 93-SRNP-4516     | 606  | [0n] | bp |
| Polythrix | asineDHJ02 | [451] | 93-SRNP-4921     | 642  | [0n] | bp |
| Polythrix | asineDHJ02 | [452] | 06-SRNP-46210    | 627  | [0n] | bp |
| Polythrix | asineDHJ02 | [453] | 94-SRNP-6175     | 618  | [0n] | bp |
| Polythrix | asineDHJ02 | [454] | 01-SRNP-12150    | 645  | [0n] | bp |
| Polythrix | asineDHJ02 | [455] | 94-SRNP-7825     | 603  | [0n] | bp |
| Polythrix | asineDHJ02 | [456] | 90-SRNP-1709     | 588  | [1n] | bp |
| Polythrix | asineDHJ02 | [457] | 92-SRNP-4667     | 600  | [0n] | bp |
| Polythrix | asineDHJ02 | [458] | 92-SRNP-4160     | 615  | [1n] | bp |
| Polythrix | asineDHJ02 | [459] | 99-SRNP-6176     | 615  | [1n] | bp |
| Polythrix | asineDHJ02 | [460] | 03-SRNP-1811     | 630  | [0n] | bp |
| Polythrix | asineDHJ02 | [461] | 93-SRNP-4316     | 606  | [0n] | bp |
| Polythrix | asineDHJ02 | [462] | 97-SRNP-5248     | 606  | [0n] | bp |
| Polythrix | asineDHJ02 | [463] | 98-SRNP-4204     | 591  | [0n] | bp |
| Polythrix | asineDHJ02 | [464] | 91-SRNP-2273     | 615  | [0n] | bp |
| Polythrix | asineDHJ02 | [465] | 92-SRNP-4981     | 609  | [0n] | bp |
| Polythrix | asineDHJ02 | [466] | 93-SRNP-221381   | [0n] | bp   |    |
| Polythrix | asineDHJ02 | [467] | 98-SRNP-4007     | 609  | [0n] | bp |
| Polythrix | asineDHJ02 | [468] | 07-SRNP-12116    | 642  | [0n] | bp |
| Polythrix | asineDHJ02 | [469] | 08-SRNP-21704    | 669  | [0n] | bp |
| Polythrix | asineDHJ02 | [470] | 08-SRNP-4981     | 669  | [0n] | bp |
| Polythrix | asineDHJ02 | [471] | 09-SRNP-14247    | 669  | [0n] | bp |
| Polythrix | caunus     | [472] | 06-SRNP-48047    | 669  | [1n] | bp |
| Polythrix | caunus     | [473] | 05-SRNP-41335    | 669  | [3n] | bp |
| Polythrix | caunus     | [474] | 07-SRNP-45093    | 669  | [0n] | bp |
| Polythrix | caunus     | [475] | 07-SRNP-45094    | 669  | [0n] | bp |
| Polythrix | caunus     | [476] | 06-SRNP-46961    | 669  | [0n] | bp |
| Polythrix | caunus     | [477] | 97-SRNP-411      | 669  | [0n] | bp |
| Polythrix | caunus     | [478] | 00-SRNP-3976     | 669  | [0n] | bp |
| Polythrix | caunus     | [479] | 01-SRNP-9329     | 669  | [0n] | bp |
| Polythrix | caunus     | [480] | 01-SRNP-11831    | 669  | [0n] | bp |
| Polythrix | caunus     | [481] | 01-SRNP-9037     | 669  | [0n] | bp |
| Polythrix | caunus     | [482] | 02-SRNP-6762     | 669  | [0n] | bp |
| Polythrix | caunus     | [483] | 04-SRNP-45147    | 669  | [0n] | bp |
| Polythrix | caunus     | [484] | 05-SRNP-61208    | 669  | [0n] | bp |
| Polythrix | caunus     | [485] | 04-SRNP-49813    | 669  | [0n] | bp |
| Polythrix | caunus     | [486] | 04-SRNP-47482    | 669  | [0n] | bp |
| Polythrix | caunus     | [487] | 04-SRNP-13678    | 669  | [0n] | bp |
| Polythrix | caunus     | [488] | 04-SRNP-56145    | 669  | [0n] | bp |
| Polythrix | caunus     | [489] | 04-SRNP-49793    | 669  | [0n] | bp |
| Polythrix | caunus     | [490] | 04-SRNP-48326    | 669  | [0n] | bp |
| Polythrix | caunus     | [491] | 06-SRNP-47938    | 669  | [1n] | bp |
| Polythrix | caunus     | [492] | 05-SRNP-40491    | 666  | [3n] | bp |
| Polythrix | caunus     | [493] | 03-SRNP-1670     | 642  | [0n] | bp |
| Polythrix | caunus     | [494] | 97-SRNP-5432     | 606  | [0n] | bp |
| Polythrix | caunus     | [495] | 00-SRNP-18463    | 606  | [0n] | bp |
| Polythrix | caunus     | [496] | 01-SRNP-9142     | 606  | [0n] | bp |
| Polythrix | caunus     | [497] | 01-SRNP-9036     | 606  | [0n] | bp |
| Polythrix | caunus     | [498] | 03-SRNP-1437     | 624  | [0n] | bp |
| Polythrix | caunus     | [499] | 02-SRNP-4214     | 606  | [0n] | bp |
| Polythrix | caunus     | [500] | 06-SRNP-23015821 | [0n] | bp   |    |

Polythrix caunus|[498]|03-SRNP-1437|624[0n]bp  
 Polythrix caunus|[499]|02-SRNP-4214|606[0n]bp  
 Polythrix caunus|[500]|96-SRNP-230|582[0n]bp  
 Polythrix caunus|[501]|07-SRNP-46448|627[1n]bp  
 Polythrix caunus|[502]|07-SRNP-47110|657[2n]bp  
 Polythrix caunus|[503]|08-SRNP-31055|669[0n]bp  
 Polythrix caunus|[504]|08-SRNP-2598|669[0n]bp  
 Polythrix caunus|[505]|08-SRNP-2600|669[0n]bp  
 Polythrix caunus|[506]|08-SRNP-2433|669[0n]bp  
 Polythrix caunus|[507]|08-SRNP-2599|669[0n]bp  
 Chrysospectrum Burns02|[508]|03-SRNP-20727|657[0n]bp  
 Polythrix octomaculata|[509]|01-SRNP-18777|639[0n]bp  
 Polythrix octomaculata|[510]|04-SRNP-16187|669[0n]bp  
 Polythrix octomaculata|[511]|06-SRNP-55510|669[0n]bp  
 Polythrix octomaculata|[512]|06-SRNP-58092|669[0n]bp  
 Polythrix octomaculata|[513]|08-SRNP-2053|669[0n]bp  
 Polythrix octomaculata|[514]|01-SRNP-12143|570[0n]bp  
 Polythrix octomaculata|[515]|06-SRNP-55601|669[0n]bp  
 Polythrix octomaculata|[516]|04-SRNP-16188|669[0n]bp  
 Polythrix octomaculata|[517]|06-SRNP-55352|669[2n]bp  
 Polythrix octomaculata|[518]|06-SRNP-55424|651[0n]bp  
 Polythrix octomaculata|[519]|06-SRNP-55112|489[0n]bp  
 Polythrix octomaculata|[520]|09-SRNP-55230|660[0n]bp  
 Polythrix auginus|[521]|08-SRNP-5805|597[0n]bp  
 Polythrix auginus|[522]|99-SRNP-2513|606[0n]bp  
 Polythrix auginus|[523]|01-SRNP-4476|606[0n]bp  
 Polythrix auginus|[524]|02-SRNP-5395|588[0n]bp  
 Polythrix auginus|[525]|05-SRNP-40942|609[0n]bp  
 Polythrix auginus|[526]|05-SRNP-40943|609[0n]bp  
 Polythrix auginus|[527]|07-SRNP-23809|606[0n]bp  
 Polythrix auginus|[528]|07-SRNP-23808|609[0n]bp  
 Polythrix auginus|[529]|02-SRNP-7476|594[5n]bp  
 Polythrix auginus|[530]|00-SRNP-21098|384[0n]bp  
 Polythrix auginus|[531]|08-SRNP-2432|393[0n]bp  
 Polythrix auginus|[532]|08-SRNP-32652|408[0n]bp  
 Polythrix auginus|[533]|09-SRNP-71706|669[0n]bp  
 Chrysospectrum pervivax|[534]|08-SRNP-55673|669[0n]bp  
 Chrysospectrum pervivax|[535]|07-SRNP-55670|669[0n]bp  
 Chrysospectrum pervivax|[536]|06-SRNP-55724|669[0n]bp  
 Chrysospectrum pervivax|[537]|06-SRNP-55725|669[0n]bp  
 Chrysospectrum pervivax|[538]|05-SRNP-55019|669[0n]bp  
 Chrysospectrum pervivax|[539]|05-SRNP-55012|669[0n]bp  
 Chrysospectrum pervivax|[540]|03-SRNP-599|657[0n]bp  
 Chrysospectrum pervivax|[541]|03-SRNP-27771|645[0n]bp  
 Chrysospectrum pervivax|[542]|05-SRNP-12099|636[0n]bp  
 Chrysospectrum pervivax|[543]|06-SRNP-55633|570[0n]bp  
 Chrysospectrum pervivax|[544]|03-SRNP-285|651[0n]bp  
 Chrysospectrum pervivax|[545]|03-SRNP-27214|663[0n]bp  
 Chrysospectrum pervivax|[546]|06-SRNP-55678|666[0n]bp  
 Chrysospectrum pervivax|[547]|08-SRNP-55510|669[0n]bp  
 Chrysospectrum pervivax|[548]|08-SRNP-55708|669[0n]bp  
 Chrysospectrum pervivax|[549]|08-SRNP-55674|669[0n]bp  
 Chrysospectrum Burns01|[550]|05-SRNP-20359|669[0n]bp  
 Chrysospectrum Burns01|[551]|03-SRNP-21246|657[0n]bp  
 Chrysospectrum Burns01|[552]|08-SRNP-41220|669[0n]bp  
 Chrysospectrum Burns01|[553]|08-SRNP-71264|669[0n]bp  
 Chrysospectrum Burns01|[554]|08-SRNP-71263|669[0n]bp  
 Chrysospectrum Burns01|[555]|07-SRNP-65253|645[0n]bp  
 Chrysospectrum Burns01|[556]|03-SRNP-5985|624[0n]bp  
 Chrysospectrum Burns01|[557]|07-SRNP-65263|666[1n]bp  
 Chrysospectrum Burns01|[558]|04-SRNP-33618|669[0n]bp  
 Chrysospectrum Burns01|[559]|04-SRNP-41884|669[0n]bp  
 Chrysospectrum Burns01|[560]|04-SRNP-60797|669[0n]bp  
 Chrysospectrum Burns01|[561]|04-SRNP-60793|669[0n]bp  
 Chrysospectrum Burns01|[562]|04-SRNP-60305|669[0n]bp  
 Chrysospectrum Burns01|[563]|03-SRNP-10713|657[0n]bp  
 Chrysospectrum Burns01|[564]|03-SRNP-30510|654[0n]bp  
 Chrysospectrum Burns01|[565]|07-SRNP-41409|654[0n]bp  
 Chrysospectrum Burns01|[566]|07-SRNP-21008|669[0n]bp  
 Chrysospectrum Burns01|[567]|07-SRNP-65264|669[0n]bp  
 Chrysospectrum Burns01|[568]|07-SRNP-65771|669[0n]bp  
 Chrysospectrum Burns01|[569]|07-SRNP-65755|669[0n]bp  
 Chrysospectrum Burns01|[570]|07-SRNP-65394|669[0n]bp  
 Chrysospectrum Burns01|[571]|08-SRNP-71635|669[0n]bp  
 Chrysospectrum Burns01|[572]|08-SRNP-71122|669[0n]bp  
 Chrysospectrum Burns01|[573]|08-SRNP-71266|669[0n]bp  
 Chrysospectrum Burns01|[574]|08-SRNP-71123|669[0n]bp  
 Chrysospectrum Burns01|[575]|09-SRNP-69180|669[0n]bp  
 Chrysospectrum Burns01|[576]|09-SRNP-22283|669[0n]bp  
 Chrysospectrum Burns01|[577]|09-SRNP-41395|669[0n]bp  
 Paches loxus|[578]|02-SRNP-5725|633[0n]bp  
 Paches loxus|[579]|02-SRNP-5985|657[0n]bp  
 Paches loxus|[580]|03-SRNP-30995|639[0n]bp  
 Paches loxus|[581]|06-SRNP-55156|669[0n]bp  
 Paches loxus|[582]|02-SRNP-5727|669[0n]bp  
 Paches loxus|[583]|02-SRNP-5726|669[0n]bp  
 Paches loxus|[584]|03-SRNP-30840|669[0n]bp  
 Paches loxus|[585]|03-SRNP-30960|669[0n]bp  
 Paches loxus|[586]|02-SRNP-5742|669[0n]bp  
 Paches loxus|[587]|02-SRNP-5517|669[0n]bp  
 Paches loxus|[588]|02-SRNP-5724|669[0n]bp  
 Paches loxus|[589]|07-SRNP-60833|669[0n]bp  
 Paches loxus|[590]|07-SRNP-60825|639[0n]bp  
 Paches loxus|[591]|04-SRNP-15261|669[0n]bp  
 Paches loxus|[592]|02-SRNP-14194|669[0n]bp  
 Paches loxus|[593]|02-SRNP-5743|669[0n]bp  
 Paches loxus|[594]|07-SRNP-60964|669[0n]bp  
 Phanus marshalliiDHJ01|[595]|03-SRNP-10532|669[0n]bp  
 Phanus marshalliiDHJ01|[596]|03-SRNP-5739|609[0n]bp  
 Phanus marshalliiDHJ01|[597]|03-SRNP-5850|609[0n]bp  
 Phanus marshalliiDHJ01|[598]|03-SRNP-16237|660[0n]bp  
 Phanus marshalliiDHJ01|[599]|03-SRNP-5857|669[0n]bp  
 Phanus marshalliiDHJ01|[600]|08-SRNP-2311|669[0n]bp

```

Phanus marshalliiDHJ01|[598]|03-SRNP-16237|660[0n]bp
Phanus marshalliiDHJ01|[599]|03-SRNP-5857|669[0n]bp
Phanus marshalliiDHJ02|[600]|08-SRNP-2311|669[0n]bp
Phanus marshalliiDHJ02|[601]|08-SRNP-21884|669[0n]bp
Phanus marshalliiDHJ02|[602]|07-SRNP-21440|669[0n]bp
Phanus marshalliiDHJ02|[603]|02-SRNP-14543|669[0n]bp
Phanus marshalliiDHJ02|[604]|02-SRNP-2186|669[0n]bp
Phanus marshalliiDHJ02|[605]|03-SRNP-16236|642[1n]bp
Phanus marshalliiDHJ02|[606]|03-SRNP-16234|669[0n]bp
Phanus marshalliiDHJ02|[607]|05-SRNP-2028|669[0n]bp
Phanus marshalliiDHJ02|[608]|02-SRNP-2185|639[0n]bp
Phanus marshalliiDHJ02|[609]|01-SRNP-14963|660[0n]bp
Phanus marshalliiDHJ02|[610]|08-SRNP-21663|615[0n]bp
Phanus obscurior|[611]|02-SRNP-1685|669[0n]bp
Phanus obscurior|[612]|08-SRNP-1691|669[0n]bp
Phanus obscurior|[613]|08-SRNP-1692|669[1n]bp
Phanus obscurior|[614]|03-SRNP-6083|669[0n]bp
Phanus obscurior|[615]|04-SRNP-60040|669[0n]bp
Phanus obscurior|[616]|06-SRNP-22131|669[0n]bp
Phanus obscurior|[617]|06-SRNP-22126|669[0n]bp
Phanus obscurior|[618]|06-SRNP-22146|669[0n]bp
Phanus obscurior|[619]|02-SRNP-3622|669[0n]bp
Phanus obscurior|[620]|02-SRNP-3270|669[0n]bp
Phanus obscurior|[621]|02-SRNP-17173|669[0n]bp
Phanus obscurior|[622]|03-SRNP-5866|669[0n]bp
Phanus obscurior|[623]|05-SRNP-1856|669[0n]bp
Phanus obscurior|[624]|03-SRNP-5851|624[1n]bp
Phanus obscurior|[625]|06-SRNP-22124|630[0n]bp
Phanus obscurior|[626]|06-SRNP-22129|642[0n]bp
Phanus obscurior|[627]|08-SRNP-1581|669[0n]bp
Phanus obscurior|[628]|08-SRNP-1580|669[0n]bp
Phanus obscurior|[629]|08-SRNP-4668|669[0n]bp
Phanus obscurior|[630]|08-SRNP-1112|669[0n]bp
Phanus obscurior|[631]|00-SRNP-870|645[0n]bp
Phanus obscurior|[632]|02-SRNP-2466|645[0n]bp
Phanus obscurior|[633]|06-SRNP-22134|669[1n]bp
Phanus obscurior|[634]|07-SRNP-2619|663[0n]bp
Phanus obscurior|[635]|06-SRNP-22127|666[0n]bp
Phanus obscurior|[636]|06-SRNP-3813|669[0n]bp
Phanus obscurior|[637]|06-SRNP-3624|669[0n]bp
Phanus obscurior|[638]|04-SRNP-60913|669[0n]bp
Phanus obscurior|[639]|06-SRNP-34130|660[0n]bp
Phanus obscurior|[640]|02-SRNP-2470|669[0n]bp
Phanus obscurior|[641]|08-SRNP-4659|669[0n]bp
Phanus vitreusDHJ02|[642]|05-SRNP-30876|669[0n]bp
Phanus vitreusDHJ02|[643]|07-SRNP-3510|669[0n]bp
Phanus vitreusDHJ02|[644]|07-SRNP-4681|669[0n]bp
Phanus vitreusDHJ02|[645]|07-SRNP-4607|627[0n]bp
Phanus vitreusDHJ02|[646]|07-SRNP-66113|669[0n]bp
Phanus vitreusDHJ02|[647]|07-SRNP-4605|669[0n]bp
Phanus vitreusDHJ02|[648]|07-SRNP-4110|669[0n]bp
Phanus vitreusDHJ02|[649]|06-SRNP-30361|669[0n]bp
Phanus vitreusDHJ02|[650]|05-SRNP-4944|669[0n]bp
Phanus vitreusDHJ02|[651]|08-SRNP-13|669[1n]bp
Phanus vitreusDHJ02|[652]|07-SRNP-42826|666[0n]bp
Phanus vitreusDHJ02|[653]|07-SRNP-4604|621[1n]bp
Phanus vitreusDHJ02|[654]|08-SRNP-40045|648[1n]bp
Phanus vitreusDHJ02|[655]|07-SRNP-24196|633[0n]bp
Phanus vitreusDHJ02|[656]|07-SRNP-24814|648[0n]bp
Phanus vitreusDHJ02|[657]|07-SRNP-4517|654[1n]bp
Phanus vitreusDHJ02|[658]|08-SRNP-41100|669[0n]bp
Phanus vitreusDHJ02|[659]|08-SRNP-40547|669[0n]bp
Phanus vitreusDHJ03|[660]|98-SRNP-4474|669[0n]bp
Phanus vitreusDHJ01|[661]|03-SRNP-3212|669[0n]bp
Phanus vitreusDHJ01|[662]|98-SRNP-4291|609[0n]bp
Phanus vitreusDHJ01|[663]|98-SRNP-4284|612[0n]bp
Phanus vitreusDHJ01|[664]|98-SRNP-4554|669[0n]bp
Phanus vitreusDHJ01|[665]|00-SRNP-2518|669[0n]bp
Phanus vitreusDHJ01|[666]|08-SRNP-5259|639[0n]bp
Phanus vitreusDHJ01|[667]|97-SRNP-647|639[0n]bp
Phanus vitreusDHJ01|[668]|98-SRNP-4552|669[0n]bp
Phanus vitreusDHJ01|[669]|98-SRNP-4289|669[0n]bp
Phanus vitreusDHJ01|[670]|98-SRNP-4556|669[1n]bp
Phanus vitreusDHJ01|[671]|98-SRNP-4466|606[0n]bp
Phanus vitreusDHJ01|[672]|97-SRNP-554|606[0n]bp
Phanus vitreusDHJ01|[673]|98-SRNP-4507|618[0n]bp
Phanus vitreusDHJ01|[674]|08-SRNP-893|669[0n]bp
Phanus vitreusDHJ01|[675]|08-SRNP-716|669[0n]bp
Phanus vitreusDHJ01|[676]|09-SRNP-55618|669[0n]bp
Phanus vitreusDHJ01|[677]|97-SRNP-648|606[0n]bp
Phanus vitreusDHJ01|[678]|02-SRNP-1762|645[0n]bp
Phanus vitreusDHJ01|[679]|00-SRNP-2561|642[0n]bp
Phanus vitreusDHJ01|[680]|97-SRNP-641|630[2n]bp
Phanus vitreusDHJ01|[681]|98-SRNP-4287|630[2n]bp
Phanus vitreusDHJ01|[682]|98-SRNP-4510|624[1n]bp
Phanus vitreusDHJ01|[683]|00-SRNP-2520|669[0n]bp
Phanus vitreusDHJ01|[684]|98-SRNP-4286|669[0n]bp
Phanus vitreusDHJ01|[685]|98-SRNP-4518|669[0n]bp
Phanus vitreusDHJ01|[686]|00-SRNP-2560|669[0n]bp
Phanus vitreusDHJ01|[687]|03-SRNP-3081|669[0n]bp
Phanus vitreusDHJ01|[688]|01-SRNP-9201|669[0n]bp
Phanus vitreusDHJ01|[689]|00-SRNP-2048|669[0n]bp
Phanus vitreusDHJ01|[690]|00-SRNP-2046|669[0n]bp
Phanus vitreusDHJ01|[691]|00-SRNP-2556|669[0n]bp
Phanus vitreusDHJ01|[692]|97-SRNP-640|669[0n]bp
Phanus vitreusDHJ01|[693]|00-SRNP-2517|669[0n]bp
Phanus vitreusDHJ01|[694]|98-SRNP-4553|669[0n]bp
Phanus vitreusDHJ01|[695]|06-SRNP-45146|669[0n]bp
Phanus vitreusDHJ01|[696]|98-SRNP-4288|657[0n]bp
Phanus vitreusDHJ01|[697]|98-SRNP-4467|657[0n]bp
Phanus vitreusDHJ01|[698]|98-SRNP-4282|618[1n]bp
Phanus vitreusDHJ01|[699]|97-SRNP-559|609[0n]bp
Phanus vitreusDHJ01|[700]|97-SRNP-662|606[0n]bp

```



|                      |       |               |     |        |
|----------------------|-------|---------------|-----|--------|
| Phanus vitreusDHJ01  | [698] | 98-SRNP-4282  | 618 | [1n]bp |
| Phanus vitreusDHJ01  | [699] | 97-SRNP-559   | 609 | [0n]bp |
| Phanus vitreusDHJ01  | [700] | 97-SRNP-562   | 606 | [0n]bp |
| Phanus vitreusDHJ01  | [701] | 97-SRNP-643   | 606 | [0n]bp |
| Phanus vitreusDHJ01  | [702] | 00-SRNP-2562  | 606 | [0n]bp |
| Phanus vitreusDHJ01  | [703] | 97-SRNP-526   | 606 | [0n]bp |
| Phanus vitreusDHJ01  | [704] | 97-SRNP-548   | 606 | [0n]bp |
| Phanus vitreusDHJ01  | [705] | 98-SRNP-4512  | 606 | [0n]bp |
| Phanus vitreusDHJ01  | [706] | 97-SRNP-642   | 606 | [0n]bp |
| Phanus vitreusDHJ01  | [707] | 98-SRNP-4473  | 606 | [0n]bp |
| Phanus vitreusDHJ01  | [708] | 97-SRNP-645   | 618 | [1n]bp |
| Phanus vitreusDHJ01  | [709] | 97-SRNP-646   | 633 | [0n]bp |
| Phanus vitreusDHJ01  | [710] | 97-SRNP-555   | 606 | [0n]bp |
| Phanus vitreusDHJ01  | [711] | 00-SRNP-2550  | 669 | [0n]bp |
| Phanus vitreusDHJ01  | [712] | 08-SRNP-713   | 669 | [0n]bp |
| Phanus vitreusDHJ01  | [713] | 08-SRNP-938   | 669 | [0n]bp |
| Phanus vitreusDHJ01  | [714] | 08-SRNP-717   | 669 | [0n]bp |
| Phanus vitreusDHJ01  | [715] | 08-SRNP-939   | 669 | [0n]bp |
| Phanus vitreusDHJ01  | [716] | 08-SRNP-824   | 669 | [0n]bp |
| Phanus vitreusDHJ01  | [717] | 08-SRNP-715   | 669 | [0n]bp |
| Phanus vitreusDHJ01  | [718] | 08-SRNP-825   | 669 | [0n]bp |
| Phanus vitreusDHJ01  | [719] | 08-SRNP-5260  | 669 | [0n]bp |
| Phanus vitreusDHJ01  | [720] | 09-SRNP-1728  | 669 | [0n]bp |
| Phanus vitreusDHJ01  | [721] | 00-SRNP-2047  | 669 | [0n]bp |
| Phanus vitreusDHJ01  | [722] | 09-SRNP-944   | 669 | [0n]bp |
| Hyalothyryrus neleus | [723] | 99-SRNP-2782  | 480 | [0n]bp |
| Hyalothyryrus neleus | [724] | 03-SRNP-15448 | 669 | [0n]bp |
| Hyalothyryrus neleus | [725] | 03-SRNP-10401 | 669 | [0n]bp |
| Hyalothyryrus neleus | [726] | 02-SRNP-5338  | 669 | [0n]bp |
| Hyalothyryrus neleus | [727] | 02-SRNP-15446 | 669 | [0n]bp |
| Hyalothyryrus neleus | [728] | 02-SRNP-4193  | 669 | [0n]bp |
| Hyalothyryrus neleus | [729] | 01-SRNP-9634  | 669 | [0n]bp |
| Hyalothyryrus neleus | [730] | 00-SRNP-2796  | 669 | [0n]bp |
| Hyalothyryrus neleus | [731] | 01-SRNP-24019 | 669 | [0n]bp |
| Hyalothyryrus neleus | [732] | 01-SRNP-11940 | 669 | [0n]bp |
| Hyalothyryrus neleus | [733] | 01-SRNP-9762  | 669 | [0n]bp |
| Hyalothyryrus neleus | [734] | 01-SRNP-9010  | 669 | [0n]bp |
| Hyalothyryrus neleus | [735] | 04-SRNP-14956 | 669 | [0n]bp |
| Hyalothyryrus neleus | [736] | 04-SRNP-23854 | 669 | [0n]bp |
| Hyalothyryrus neleus | [737] | 02-SRNP-5623  | 651 | [0n]bp |
| Hyalothyryrus neleus | [738] | 02-SRNP-2903  | 651 | [0n]bp |
| Hyalothyryrus neleus | [739] | 07-SRNP-1289  | 669 | [0n]bp |
| Hyalothyryrus neleus | [740] | 05-SRNP-23937 | 669 | [0n]bp |
| Hyalothyryrus neleus | [741] | 05-SRNP-24060 | 669 | [0n]bp |
| Hyalothyryrus neleus | [742] | 05-SRNP-33739 | 669 | [0n]bp |
| Hyalothyryrus neleus | [743] | 07-SRNP-1874  | 669 | [0n]bp |
| Hyalothyryrus neleus | [744] | 08-SRNP-20639 | 669 | [0n]bp |
| Entheus Burns01      | [745] | 05-SRNP-31825 | 669 | [0n]bp |
| Entheus Burns01      | [746] | 05-SRNP-31804 | 669 | [0n]bp |
| Entheus Burns01      | [747] | 03-SRNP-3912  | 669 | [0n]bp |
| Entheus Burns01      | [748] | 05-SRNP-31679 | 687 | [0n]bp |
| Entheus Burns01      | [749] | 05-SRNP-31813 | 687 | [0n]bp |
| Entheus Burns01      | [750] | 05-SRNP-31809 | 687 | [0n]bp |
| Entheus Burns01      | [751] | 05-SRNP-31684 | 687 | [0n]bp |
| Entheus Burns01      | [752] | 05-SRNP-31469 | 669 | [0n]bp |
| Entheus Burns01      | [753] | 05-SRNP-31803 | 669 | [0n]bp |
| Entheus Burns01      | [754] | 05-SRNP-31805 | 669 | [0n]bp |
| Entheus Burns01      | [755] | 05-SRNP-31467 | 669 | [0n]bp |
| Entheus Burns01      | [756] | 05-SRNP-31811 | 669 | [0n]bp |
| Entheus Burns01      | [757] | 05-SRNP-31807 | 669 | [0n]bp |
| Entheus Burns01      | [758] | 05-SRNP-31470 | 669 | [0n]bp |
| Entheus Burns01      | [759] | 05-SRNP-31681 | 669 | [0n]bp |
| Entheus Burns01      | [760] | 05-SRNP-31680 | 669 | [0n]bp |
| Entheus Burns01      | [761] | 05-SRNP-31685 | 669 | [0n]bp |
| Entheus Burns01      | [762] | 04-SRNP-35514 | 669 | [0n]bp |
| Entheus Burns01      | [763] | 04-SRNP-56807 | 669 | [0n]bp |
| Entheus Burns01      | [764] | 05-SRNP-30012 | 669 | [0n]bp |
| Entheus Burns01      | [765] | 05-SRNP-30006 | 669 | [0n]bp |
| Entheus Burns01      | [766] | 05-SRNP-30261 | 669 | [0n]bp |
| Entheus Burns01      | [767] | 04-SRNP-32629 | 669 | [0n]bp |
| Entheus Burns01      | [768] | 04-SRNP-32406 | 669 | [0n]bp |
| Entheus Burns01      | [769] | 04-SRNP-32627 | 669 | [0n]bp |
| Entheus Burns01      | [770] | 04-SRNP-22955 | 669 | [0n]bp |
| Entheus Burns01      | [771] | 04-SRNP-32897 | 669 | [0n]bp |
| Entheus Burns01      | [772] | 04-SRNP-32435 | 669 | [0n]bp |
| Entheus Burns01      | [773] | 04-SRNP-32100 | 669 | [0n]bp |
| Entheus Burns01      | [774] | 04-SRNP-32971 | 669 | [0n]bp |
| Entheus Burns01      | [775] | 04-SRNP-32102 | 669 | [0n]bp |
| Entheus Burns01      | [776] | 04-SRNP-32620 | 669 | [0n]bp |
| Entheus Burns01      | [777] | 04-SRNP-32626 | 669 | [0n]bp |
| Entheus Burns01      | [778] | 04-SRNP-32624 | 669 | [0n]bp |
| Entheus Burns01      | [779] | 04-SRNP-32619 | 669 | [0n]bp |
| Entheus Burns01      | [780] | 03-SRNP-4063  | 669 | [0n]bp |
| Entheus Burns01      | [781] | 03-SRNP-4085  | 669 | [0n]bp |
| Entheus Burns01      | [782] | 03-SRNP-4083  | 669 | [0n]bp |
| Entheus Burns01      | [783] | 03-SRNP-4089  | 669 | [0n]bp |
| Entheus Burns01      | [784] | 03-SRNP-4031  | 669 | [0n]bp |
| Entheus Burns01      | [785] | 03-SRNP-3913  | 669 | [0n]bp |
| Entheus Burns01      | [786] | 03-SRNP-4079  | 669 | [0n]bp |
| Entheus Burns01      | [787] | 03-SRNP-4150  | 669 | [0n]bp |
| Entheus Burns01      | [788] | 03-SRNP-3910  | 669 | [0n]bp |
| Entheus Burns01      | [789] | 03-SRNP-4088  | 669 | [0n]bp |
| Entheus Burns01      | [790] | 03-SRNP-3911  | 669 | [0n]bp |
| Entheus Burns01      | [791] | 03-SRNP-4062  | 669 | [0n]bp |
| Entheus Burns01      | [792] | 05-SRNP-31988 | 669 | [0n]bp |
| Entheus Burns01      | [793] | 04-SRNP-32128 | 669 | [0n]bp |
| Entheus Burns01      | [794] | 02-SRNP-9578  | 657 | [0n]bp |
| Entheus Burns01      | [795] | 02-SRNP-8498  | 603 | [0n]bp |
| Entheus Burns01      | [796] | 02-SRNP-8540  | 603 | [0n]bp |
| Entheus Burns01      | [797] | 02-SRNP-9309  | 651 | [0n]bp |
| Entheus Burns01      | [798] | 08-SRNP-35619 | 669 | [0n]bp |
| Entheus Burns01      | [799] | 08-SRNP-35620 | 669 | [0n]bp |

Entheus Burns01| [797] |02-SRNP-3509|669[0n]bp  
 Entheus Burns01| [798] |08-SRNP-35619|669[0n]bp  
 Entheus Burns01| [799] |08-SRNP-35620|669[0n]bp  
 Entheus Burns03| [800] |07-SRNP-65862|621[0n]bp  
 Entheus Burns03| [801] |03-SRNP-6132|654[0n]bp  
 Entheus Burns03| [802] |06-SRNP-44097|621[2n]bp  
 Entheus Burns03| [803] |07-SRNP-65775|648[0n]bp  
 Entheus Burns03| [804] |03-SRNP-21789|630[0n]bp  
 Entheus Burns03| [805] |02-SRNP-19102|630[0n]bp  
 Entheus Burns03| [806] |05-SRNP-195|669[0n]bp  
 Entheus Burns03| [807] |04-SRNP-56418|669[0n]bp  
 Entheus Burns03| [808] |05-SRNP-30875|615[0n]bp  
 Entheus Burns03| [809] |05-SRNP-54|687[0n]bp  
 Entheus Burns03| [810] |05-SRNP-1251|687[0n]bp  
 Entheus Burns03| [811] |07-SRNP-65331|669[0n]bp  
 Entheus Burns03| [812] |07-SRNP-65174|669[0n]bp  
 Entheus Burns03| [813] |07-SRNP-2018|669[0n]bp  
 Entheus Burns03| [814] |07-SRNP-2055|669[0n]bp  
 Entheus Burns03| [815] |07-SRNP-65148|669[0n]bp  
 Entheus Burns03| [816] |07-SRNP-1374|669[0n]bp  
 Entheus Burns03| [817] |07-SRNP-65011|669[0n]bp  
 Entheus Burns03| [818] |06-SRNP-44104|669[0n]bp  
 Entheus Burns03| [819] |06-SRNP-31151|669[0n]bp  
 Entheus Burns03| [820] |05-SRNP-1370|669[0n]bp  
 Entheus Burns03| [821] |04-SRNP-55949|669[0n]bp  
 Entheus Burns03| [822] |05-SRNP-196|669[0n]bp  
 Entheus Burns03| [823] |04-SRNP-55940|669[0n]bp  
 Entheus Burns03| [824] |04-SRNP-61137|669[0n]bp  
 Entheus Burns03| [825] |04-SRNP-61243|669[0n]bp  
 Entheus Burns03| [826] |04-SRNP-2113|669[0n]bp  
 Entheus Burns03| [827] |04-SRNP-1610|669[0n]bp  
 Entheus Burns03| [828] |04-SRNP-1609|669[0n]bp  
 Entheus Burns03| [829] |04-SRNP-60791|666[0n]bp  
 Entheus Burns03| [830] |06-SRNP-31150|669[1n]bp  
 Entheus Burns03| [831] |03-SRNP-21250|639[0n]bp  
 Entheus Burns03| [832] |03-SRNP-6130|663[0n]bp  
 Entheus Burns03| [833] |07-SRNP-65230|660[0n]bp  
 Entheus Burns03| [834] |07-SRNP-65191|669[0n]bp  
 Entheus Burns03| [835] |08-SRNP-65008|669[0n]bp  
 Entheus Burns03| [836] |08-SRNP-65118|669[0n]bp  
 Entheus Burns03| [837] |08-SRNP-65323|669[0n]bp  
 Entheus Burns03| [838] |08-SRNP-66040|669[0n]bp  
 Entheus Burns03| [839] |09-SRNP-56806|669[0n]bp  
 Entheus Burns02| [840] |08-SRNP-72638|642[2n]bp  
 Entheus Burns02| [841] |00-SRNP-2001|639[0n]bp  
 Entheus Burns02| [842] |99-SRNP-15392|639[0n]bp  
 Entheus Burns02| [843] |05-SRNP-31934|669[0n]bp  
 Entheus Burns02| [844] |08-SRNP-31023|669[0n]bp  
 Entheus Burns02| [845] |08-SRNP-71195|669[0n]bp  
 Entheus Burns02| [846] |08-SRNP-33091|669[0n]bp  
 Entheus Burns02| [847] |08-SRNP-71849|669[0n]bp  
 Entheus Burns02| [848] |08-SRNP-72316|669[0n]bp  
 Entheus Burns02| [849] |08-SRNP-71739|669[0n]bp  
 Entheus Burns02| [850] |08-SRNP-70953|669[0n]bp  
 Entheus Burns02| [851] |08-SRNP-70952|669[0n]bp  
 Entheus Burns02| [852] |08-SRNP-71814|669[0n]bp  
 Entheus Burns02| [853] |08-SRNP-71740|669[0n]bp  
 Entheus Burns02| [854] |08-SRNP-71134|669[0n]bp  
 Entheus Burns02| [855] |06-SRNP-20135|669[0n]bp  
 Entheus Burns02| [856] |06-SRNP-34837|669[0n]bp  
 Entheus Burns02| [857] |05-SRNP-21189|669[0n]bp  
 Entheus Burns02| [858] |05-SRNP-32113|669[0n]bp  
 Entheus Burns02| [859] |05-SRNP-34263|591[0n]bp  
 Entheus Burns02| [860] |06-SRNP-32638|609[0n]bp  
 Entheus Burns02| [861] |05-SRNP-34780|609[0n]bp  
 Entheus Burns02| [862] |02-SRNP-14694|642[0n]bp  
 Entheus Burns02| [863] |09-SRNP-30020|615[0n]bp  
 Entheus Burns02| [864] |09-SRNP-70294|669[0n]bp  
 Entheus Burns02| [865] |09-SRNP-71529|669[0n]bp  
 Entheus Burns02| [866] |09-SRNP-70531|669[0n]bp  
 Antigonus nearchus| [867] |00-SRNP-12980|627[0n]bp  
 Antigonus nearchus| [868] |00-SRNP-10364|645[1n]bp  
 Antigonus nearchus| [869] |06-SRNP-32799|669[0n]bp  
 Antigonus nearchus| [870] |01-SRNP-5567|657[0n]bp  
 Antigonus nearchus| [871] |96-SRNP-11137|606[0n]bp  
 Antigonus nearchus| [872] |06-SRNP-67851|657[0n]bp  
 Timochreon satyrus| [873] |98-SRNP-4800|576[0n]bp  
 Timochreon satyrus| [874] |07-SRNP-55646|669[0n]bp  
 Timochreon satyrus| [875] |07-SRNP-58884|669[0n]bp  
 Timochreon satyrus| [876] |07-SRNP-55299|669[0n]bp  
 Timochreon satyrus| [877] |06-SRNP-59556|669[0n]bp  
 Timochreon satyrus| [878] |06-SRNP-57946|669[0n]bp  
 Timochreon satyrus| [879] |02-SRNP-5343|669[0n]bp  
 Timochreon satyrus| [880] |00-SRNP-3407|669[0n]bp  
 Timochreon satyrus| [881] |01-SRNP-11952|669[0n]bp  
 Timochreon satyrus| [882] |05-SRNP-24369|669[0n]bp  
 Timochreon satyrus| [883] |04-SRNP-16184|669[0n]bp  
 Timochreon satyrus| [884] |04-SRNP-26992|669[0n]bp  
 Timochreon satyrus| [885] |04-SRNP-21555|669[0n]bp  
 Timochreon satyrus| [886] |97-SRNP-4864|660[0n]bp  
 Timochreon satyrus| [887] |02-SRNP-4030|654[0n]bp  
 Timochreon satyrus| [888] |02-SRNP-15405|630[1n]bp  
 Timochreon satyrus| [889] |97-SRNP-4132|606[0n]bp  
 Timochreon satyrus| [890] |01-SRNP-11309|642[0n]bp  
 Timochreon satyrus| [891] |02-SRNP-14811|621[0n]bp  
 Timochreon satyrus| [892] |02-SRNP-33938|606[0n]bp  
 Timochreon satyrus| [893] |07-SRNP-55645|669[0n]bp  
 Timochreon satyrus| [894] |07-SRNP-55655|669[0n]bp  
 Timochreon satyrus| [895] |09-SRNP-73053|669[0n]bp  
 Heliopetes lavianaDHJ02| [896] |06-SRNP-19429|669[0n]bp  
 Heliopetes lavianaDHJ02| [897] |06-SRNP-19419|669[0n]bp  
 Heliopetes lavianaDHJ02| [898] |06-SRNP-19431|669[0n]bp  
 Heliopetes lavianaDHJ02| [899] |06-SRNP-18783|669[0n]bp

Heliopetes lavianaDHJ02|[897]|06-SRNP-19419|669[0n]bp  
Heliopetes lavianaDHJ02|[898]|06-SRNP-19431|669[0n]bp  
Heliopetes lavianaDHJ02|[899]|06-SRNP-18783|669[0n]bp  
Heliopetes lavianaDHJ02|[900]|06-SRNP-19423|669[0n]bp  
Heliopetes lavianaDHJ02|[901]|06-SRNP-19396|669[0n]bp  
Heliopetes lavianaDHJ02|[902]|06-SRNP-19523|669[0n]bp  
Heliopetes lavianaDHJ02|[903]|06-SRNP-19420|669[0n]bp  
Heliopetes lavianaDHJ02|[904]|06-SRNP-19397|669[0n]bp  
Heliopetes lavianaDHJ02|[905]|06-SRNP-19416|669[0n]bp  
Heliopetes lavianaDHJ02|[906]|06-SRNP-18781|669[0n]bp  
Heliopetes lavianaDHJ02|[907]|04-SRNP-45705|669[0n]bp  
Heliopetes lavianaDHJ02|[908]|04-SRNP-45704|660[0n]bp  
Heliopetes lavianaDHJ02|[909]|06-SRNP-19448|669[0n]bp  
Heliopetes lavianaDHJ02|[910]|06-SRNP-19402|669[0n]bp  
Heliopetes lavianaDHJ02|[911]|06-SRNP-19622|669[0n]bp  
Heliopetes lavianaDHJ02|[912]|06-SRNP-18780|669[0n]bp  
Heliopetes lavianaDHJ02|[913]|06-SRNP-19414|669[0n]bp  
Heliopetes lavianaDHJ02|[914]|06-SRNP-19401|669[0n]bp  
Heliopetes alana|[915]|04-SRNP-48169|669[0n]bp  
Heliopetes alana|[916]|05-SRNP-55030|669[0n]bp  
Heliopetes alana|[917]|05-SRNP-5611|669[0n]bp  
Heliopetes alana|[918]|06-SRNP-6703|669[0n]bp  
Heliopetes arsalte|[919]|09-SRNP-2102|669[0n]bp  
Heliopetes arsalte|[920]|09-SRNP-44424|669[0n]bp  
Heliopetes arsalte|[921]|05-SRNP-31020|669[0n]bp  
Heliopetes arsalte|[922]|05-SRNP-34906|630[0n]bp  
Heliopetes arsalte|[923]|06-SRNP-2053|633[0n]bp  
Heliopetes arsalte|[924]|04-SRNP-42488|669[0n]bp  
Heliopetes arsalte|[925]|05-SRNP-3992|669[0n]bp  
Heliopetes arsalte|[926]|06-SRNP-19606|669[0n]bp  
Heliopetes arsalte|[927]|07-SRNP-55805|669[0n]bp  
Heliopetes arsalte|[928]|09-SRNP-71844|669[0n]bp  
Heliopetes arsalte|[929]|09-SRNP-2103|669[0n]bp  
Heliopetes arsalte|[930]|09-SRNP-72759|669[0n]bp  
Pyrgus adepta|[931]|05-SRNP-61486|669[0n]bp  
Pyrgus adepta|[932]|05-SRNP-3108|669[0n]bp  
Pyrgus adepta|[933]|05-SRNP-4774|669[0n]bp  
Pyrgus adepta|[934]|05-SRNP-3111|669[0n]bp  
Pyrgus adepta|[935]|05-SRNP-6162|630[0n]bp  
Pyrgus adepta|[936]|06-SRNP-3986|669[0n]bp  
Pyrgus adepta|[937]|06-SRNP-22079|669[0n]bp  
Pyrgus adepta|[938]|07-SRNP-57963|669[0n]bp  
Pyrgus adepta|[939]|08-SRNP-40797|669[0n]bp  
Pyrgus adepta|[940]|09-SRNP-35755|669[0n]bp  
Pyrgus oileusDHJ01|[941]|05-SRNP-47404|669[0n]bp  
Pyrgus oileusDHJ02|[942]|09-SRNP-72609|669[0n]bp  
Pyrgus oileusDHJ02|[943]|09-SRNP-57316|669[0n]bp  
Pyrgus oileusDHJ02|[944]|04-SRNP-4880|669[0n]bp  
Pyrgus oileusDHJ02|[945]|97-SRNP-6018|372[0n]bp  
Pyrgus oileusDHJ02|[946]|97-SRNP-6017|588[4n]bp  
Pyrgus oileusDHJ02|[947]|97-SRNP-6323|660[0n]bp  
Pyrgus oileusDHJ02|[948]|07-SRNP-30612|669[0n]bp  
Pyrgus oileusDHJ02|[949]|07-SRNP-41537|669[0n]bp  
Pyrgus oileusDHJ02|[950]|07-SRNP-33658|669[0n]bp  
Pyrgus oileusDHJ02|[951]|09-SRNP-41756|669[0n]bp  
Pyrgus oileusDHJ03|[952]|05-SRNP-41121|669[0n]bp  
Pyrgus oileusDHJ03|[953]|05-SRNP-41120|684[0n]bp  
Pyrgus oileusDHJ03|[954]|97-SRNP-468|669[0n]bp  
Pyrgus oileusDHJ03|[955]|05-SRNP-5995|624[0n]bp  
Pyrgus oileusDHJ03|[956]|93-SRNP-6385|666[1n]bp  
Pyrgus oileusDHJ03|[957]|06-SRNP-59892|669[0n]bp  
Pyrgus oileusDHJ03|[958]|05-SRNP-42130|669[0n]bp  
Pyrgus oileusDHJ03|[959]|05-SRNP-3112|669[0n]bp  
Pyrgus oileusDHJ03|[960]|04-SRNP-4881|669[0n]bp  
Pyrgus oileusDHJ03|[961]|05-SRNP-56295|684[0n]bp  
Pyrgus oileusDHJ03|[962]|07-SRNP-58554|660[0n]bp  
Pyrgus oileusDHJ03|[963]|08-SRNP-71705|669[0n]bp  
Pyrgus oileusDHJ03|[964]|09-SRNP-44136|669[0n]bp  
Pyrgus oileusDHJ03|[965]|09-SRNP-73409|669[0n]bp  
Pyrgus oileusDHJ03|[966]|09-SRNP-73394|669[0n]bp  
Zopyrion sandace|[967]|93-SRNP-7566|669[0n]bp  
Zopyrion sandace|[968]|97-SRNP-9768|669[0n]bp  
Antigonus erosus|[969]|04-SRNP-14882|669[0n]bp  
Antigonus erosus|[970]|04-SRNP-15034|669[0n]bp  
Antigonus erosus|[971]|07-SRNP-57033|669[0n]bp  
Antigonus erosus|[972]|04-SRNP-14311|669[0n]bp  
Antigonus erosus|[973]|04-SRNP-47715|669[1n]bp  
Antigonus erosus|[974]|04-SRNP-48661|669[0n]bp  
Antigonus erosus|[975]|05-SRNP-34080|573[0n]bp  
Antigonus erosus|[976]|05-SRNP-2158|669[0n]bp  
Antigonus erosus|[977]|05-SRNP-45294|669[0n]bp  
Antigonus erosus|[978]|05-SRNP-2157|669[0n]bp  
Antigonus erosus|[979]|05-SRNP-55042|669[0n]bp  
Antigonus erosus|[980]|07-SRNP-40136|669[0n]bp  
Antigonus erosus|[981]|06-SRNP-6733|669[0n]bp  
Antigonus erosus|[982]|06-SRNP-44597|669[0n]bp  
Antigonus erosus|[983]|04-SRNP-15182|669[0n]bp  
Antigonus erosus|[984]|04-SRNP-48127|669[0n]bp  
Antigonus erosus|[985]|04-SRNP-47713|669[0n]bp  
Antigonus erosus|[986]|04-SRNP-48470|669[0n]bp  
Antigonus erosus|[987]|04-SRNP-4027|669[0n]bp  
Antigonus erosus|[988]|04-SRNP-15037|669[0n]bp  
Antigonus erosus|[989]|04-SRNP-14884|669[0n]bp  
Antigonus erosus|[990]|04-SRNP-14704|669[0n]bp  
Antigonus erosus|[991]|04-SRNP-48663|669[0n]bp  
Antigonus erosus|[992]|04-SRNP-46846|669[0n]bp  
Antigonus erosus|[993]|03-SRNP-916|642[0n]bp  
Antigonus erosus|[994]|04-SRNP-14889|669[1n]bp  
Antigonus erosus|[995]|06-SRNP-5959|669[0n]bp  
Antigonus erosus|[996]|03-SRNP-5120|657[0n]bp  
Antigonus erosus|[997]|05-SRNP-5668|645[0n]bp  
Antigonus erosus|[998]|07-SRNP-2954|669[0n]bp  
Antigonus erosus|[999]|07-SRNP-42448|669[0n]bp  
Antigonus erosus|[1000]|07-SRNP-3282|669[0n]bp

Antigonus erosus|[997]|07-SRNP-2954|669[0n]bp  
 Antigonus erosus|[998]|07-SRNP-2954|669[0n]bp  
 Antigonus erosus|[999]|07-SRNP-42448|669[0n]bp  
 Antigonus erosus|[1000]|07-SRNP-3283|669[0n]bp  
 Antigonus erosus|[1001]|07-SRNP-23787|669[0n]bp  
 Antigonus erosus|[1002]|08-SRNP-31067|669[0n]bp  
 Antigonus erosus|[1003]|09-SRNP-43129|669[0n]bp  
 Antigonus erosus|[1004]|09-SRNP-67761|669[0n]bp  
 Carrhenes calidius|[1005]|01-SRNP-11410|549[0n]bp  
 Carrhenes calidius|[1006]|05-SRNP-1277|642[2n]bp  
 Carrhenes calidius|[1007]|08-SRNP-21848|669[0n]bp  
 Carrhenes calidius|[1008]|08-SRNP-21846|669[0n]bp  
 Carrhenes calidius|[1009]|08-SRNP-6834|669[0n]bp  
 Carrhenes calidius|[1010]|06-SRNP-42410|669[0n]bp  
 Carrhenes calidius|[1011]|06-SRNP-42411|669[0n]bp  
 Carrhenes calidius|[1012]|05-SRNP-41755|645[2n]bp  
 Carrhenes calidius|[1013]|06-SRNP-23205|669[0n]bp  
 Carrhenes calidius|[1014]|06-SRNP-23245|669[0n]bp  
 Carrhenes calidius|[1015]|97-SRNP-5991|627[0n]bp  
 Carrhenes calidius|[1016]|05-SRNP-41905|669[6n]bp  
 Carrhenes calidius|[1017]|05-SRNP-41664|654[1n]bp  
 Carrhenes calidius|[1018]|08-SRNP-4738|669[0n]bp  
 Carrhenes calidius|[1019]|08-SRNP-4735|669[0n]bp  
 Carrhenes calidius|[1020]|08-SRNP-4737|669[0n]bp  
 Carrhenes calidius|[1021]|08-SRNP-4736|669[0n]bp  
 Carrhenes calidius|[1022]|08-SRNP-21817|669[0n]bp  
 Carrhenes calidius|[1023]|08-SRNP-20689|669[0n]bp  
 Carrhenes calidius|[1024]|08-SRNP-21489|669[0n]bp  
 Carrhenes calidius|[1025]|08-SRNP-20418|669[0n]bp  
 Carrhenes calidius|[1026]|06-SRNP-46362|669[0n]bp  
 Carrhenes calidius|[1027]|06-SRNP-23272|669[0n]bp  
 Carrhenes calidius|[1028]|06-SRNP-23273|669[0n]bp  
 Carrhenes calidius|[1029]|06-SRNP-23275|669[0n]bp  
 Carrhenes calidius|[1030]|06-SRNP-42412|669[0n]bp  
 Carrhenes calidius|[1031]|06-SRNP-42408|669[0n]bp  
 Carrhenes calidius|[1032]|04-SRNP-42196|669[0n]bp  
 Carrhenes calidius|[1033]|04-SRNP-49279|669[0n]bp  
 Carrhenes calidius|[1034]|03-SRNP-37789|669[0n]bp  
 Carrhenes calidius|[1035]|04-SRNP-40341|669[0n]bp  
 Carrhenes calidius|[1036]|05-SRNP-4276|654[2n]bp  
 Carrhenes calidius|[1037]|05-SRNP-25254|576[0n]bp  
 Carrhenes calidius|[1038]|06-SRNP-22483|633[0n]bp  
 Carrhenes calidius|[1039]|09-SRNP-21630|669[1n]bp  
 Carrhenes fuscescens|[1040]|92-SRNP-3412|663[0n]bp  
 Carrhenes fuscescens|[1041]|95-SRNP-6803|669[0n]bp  
 Carrhenes fuscescens|[1042]|95-SRNP-6809|669[0n]bp  
 Carrhenes fuscescens|[1043]|96-SRNP-7811|669[0n]bp  
 Carrhenes fuscescens|[1044]|95-SRNP-6818|669[0n]bp  
 Carrhenes fuscescens|[1045]|95-SRNP-6813|669[0n]bp  
 Carrhenes fuscescens|[1046]|95-SRNP-6806|669[0n]bp  
 Carrhenes fuscescens|[1047]|95-SRNP-6801|669[0n]bp  
 Carrhenes fuscescens|[1048]|95-SRNP-6819|630[0n]bp  
 Carrhenes fuscescens|[1049]|95-SRNP-6804|627[0n]bp  
 Carrhenes fuscescens|[1050]|92-SRNP-3012|570[2n]bp  
 Carrhenes fuscescens|[1051]|92-SRNP-3014|609[0n]bp  
 Carrhenes fuscescens|[1052]|93-SRNP-1137|669[0n]bp  
 Carrhenes fuscescens|[1053]|95-SRNP-6820|669[0n]bp  
 Carrhenes fuscescens|[1054]|92-SRNP-3004|669[0n]bp  
 Carrhenes fuscescens|[1055]|92-SRNP-3393|669[0n]bp  
 Anisochoria polysticta|[1056]|03-SRNP-26746|660[0n]bp  
 Anisochoria polysticta|[1057]|98-SRNP-12227|639[0n]bp  
 Anisochoria polysticta|[1058]|04-SRNP-15485|669[0n]bp  
 Anisochoria polysticta|[1059]|04-SRNP-15751|669[0n]bp  
 Anisochoria polysticta|[1060]|04-SRNP-15486|669[0n]bp  
 Anisochoria polysticta|[1061]|07-SRNP-55564|669[0n]bp  
 Xenophanes tryxus|[1062]|05-SRNP-55815|669[1n]bp  
 Xenophanes tryxus|[1063]|04-SRNP-23772|633[0n]bp  
 Xenophanes tryxus|[1064]|08-SRNP-709|669[0n]bp  
 Xenophanes tryxus|[1065]|08-SRNP-40407|669[0n]bp  
 Xenophanes tryxus|[1066]|08-SRNP-40406|669[0n]bp  
 Xenophanes tryxus|[1067]|07-SRNP-42914|669[0n]bp  
 Xenophanes tryxus|[1068]|07-SRNP-21825|669[0n]bp  
 Xenophanes tryxus|[1069]|07-SRNP-42042|669[0n]bp  
 Xenophanes tryxus|[1070]|07-SRNP-2177|669[0n]bp  
 Xenophanes tryxus|[1071]|07-SRNP-2117|669[0n]bp  
 Xenophanes tryxus|[1072]|07-SRNP-32155|669[0n]bp  
 Xenophanes tryxus|[1073]|05-SRNP-55198|669[0n]bp  
 Xenophanes tryxus|[1074]|04-SRNP-15683|669[0n]bp  
 Xenophanes tryxus|[1075]|04-SRNP-41977|669[0n]bp  
 Xenophanes tryxus|[1076]|04-SRNP-15686|669[0n]bp  
 Xenophanes tryxus|[1077]|04-SRNP-23770|669[0n]bp  
 Xenophanes tryxus|[1078]|04-SRNP-23767|669[0n]bp  
 Xenophanes tryxus|[1079]|04-SRNP-23769|669[0n]bp  
 Xenophanes tryxus|[1080]|04-SRNP-24073|669[1n]bp  
 Xenophanes tryxus|[1081]|05-SRNP-30987|669[2n]bp  
 Xenophanes tryxus|[1082]|08-SRNP-40408|594[3n]bp  
 Xenophanes tryxus|[1083]|92-SRNP-4663|399[0n]bp  
 Xenophanes tryxus|[1084]|93-SRNP-5818|399[0n]bp  
 Xenophanes tryxus|[1085]|08-SRNP-40109|630[0n]bp  
 Xenophanes tryxus|[1086]|08-SRNP-40108|669[0n]bp  
 Xenophanes tryxus|[1087]|08-SRNP-652|669[0n]bp  
 Xenophanes tryxus|[1088]|08-SRNP-653|669[0n]bp  
 Xenophanes tryxus|[1089]|08-SRNP-650|669[0n]bp  
 Xenophanes tryxus|[1090]|08-SRNP-710|669[0n]bp  
 Xenophanes tryxus|[1091]|08-SRNP-1428|669[0n]bp  
 Xenophanes tryxus|[1092]|09-SRNP-75047|669[0n]bp  
 Xenophanes tryxus|[1093]|09-SRNP-42129|669[0n]bp  
 Carrhenes meridensis|[1094]|97-SRNP-1522|624[0n]bp  
 Carrhenes canescensDHJ02|[1095]|04-SRNP-47072|669[0n]bp  
 Carrhenes canescensDHJ02|[1096]|05-SRNP-65241|576[0n]bp  
 Carrhenes canescensDHJ02|[1097]|04-SRNP-2161|669[0n]bp  
 Carrhenes canescensDHJ02|[1098]|08-SRNP-1435|669[0n]bp  
 Carrhenes canescensDHJ02|[1099]|07-SRNP-2297|669[0n]bp  
 Carrhenes canescensDHJ02|[1100]|07-SRNP-57235|669[0n]bp

|                          |        |               |           |
|--------------------------|--------|---------------|-----------|
| Carrhenes canescensDHJ02 | [1097] | 04-SRNP-2191  | 669[0n]bp |
| Carrhenes canescensDHJ02 | [1098] | 08-SRNP-1435  | 669[0n]bp |
| Carrhenes canescensDHJ02 | [1099] | 07-SRNP-2297  | 669[0n]bp |
| Carrhenes canescensDHJ02 | [1100] | 07-SRNP-57525 | 669[0n]bp |
| Carrhenes canescensDHJ02 | [1101] | 05-SRNP-55226 | 669[0n]bp |
| Carrhenes canescensDHJ02 | [1102] | 04-SRNP-40196 | 639[0n]bp |
| Carrhenes canescensDHJ02 | [1103] | 94-SRNP-576   | 618[0n]bp |
| Carrhenes canescensDHJ02 | [1104] | 97-SRNP-796   | 669[0n]bp |
| Carrhenes canescensDHJ02 | [1105] | 98-SRNP-6223  | 669[0n]bp |
| Carrhenes canescensDHJ02 | [1106] | 98-SRNP-2076  | 669[0n]bp |
| Carrhenes canescensDHJ02 | [1107] | 98-SRNP-2077  | 669[0n]bp |
| Carrhenes canescensDHJ02 | [1108] | 09-SRNP-55887 | 669[0n]bp |
| Carrhenes canescensDHJ02 | [1109] | 08-SRNP-1302  | 669[0n]bp |
| Carrhenes canescensDHJ02 | [1110] | 04-SRNP-35287 | 669[0n]bp |
| Carrhenes canescensDHJ02 | [1111] | 98-SRNP-2086  | 627[0n]bp |
| Carrhenes canescensDHJ02 | [1112] | 06-SRNP-3394  | 666[0n]bp |
| Carrhenes canescensDHJ02 | [1113] | 94-SRNP-572   | 399[0n]bp |
| Carrhenes canescensDHJ02 | [1114] | 94-SRNP-598   | 606[0n]bp |
| Carrhenes canescensDHJ02 | [1115] | 00-SRNP-11710 | 669[0n]bp |
| Carrhenes canescensDHJ02 | [1116] | 02-SRNP-32202 | 669[0n]bp |
| Carrhenes canescensDHJ02 | [1117] | 98-SRNP-2075  | 669[0n]bp |
| Carrhenes canescensDHJ02 | [1118] | 98-SRNP-6658  | 669[0n]bp |
| Carrhenes canescensDHJ02 | [1119] | 99-SRNP-4815  | 669[0n]bp |
| Carrhenes canescensDHJ01 | [1120] | 08-SRNP-1544  | 669[0n]bp |
| Carrhenes canescensDHJ01 | [1121] | 01-SRNP-2081  | 669[0n]bp |
| Carrhenes canescensDHJ01 | [1122] | 96-SRNP-11205 | 669[0n]bp |
| Carrhenes canescensDHJ01 | [1123] | 99-SRNP-2264  | 669[0n]bp |
| Carrhenes canescensDHJ01 | [1124] | 99-SRNP-2257  | 669[0n]bp |
| Carrhenes canescensDHJ01 | [1125] | 02-SRNP-18792 | 669[0n]bp |
| Carrhenes canescensDHJ01 | [1126] | 98-SRNP-4264  | 669[0n]bp |
| Carrhenes canescensDHJ01 | [1127] | 04-SRNP-45774 | 669[0n]bp |
| Carrhenes canescensDHJ01 | [1128] | 01-SRNP-1279  | 669[0n]bp |
| Carrhenes canescensDHJ01 | [1129] | 98-SRNP-6283  | 669[0n]bp |
| Carrhenes canescensDHJ01 | [1130] | 97-SRNP-6032  | 669[0n]bp |
| Carrhenes canescensDHJ01 | [1131] | 98-SRNP-6194  | 669[0n]bp |
| Carrhenes canescensDHJ01 | [1132] | 98-SRNP-6497  | 669[0n]bp |
| Carrhenes canescensDHJ01 | [1133] | 98-SRNP-6704  | 669[0n]bp |
| Carrhenes canescensDHJ01 | [1134] | 08-SRNP-45047 | 669[0n]bp |
| Carrhenes canescensDHJ01 | [1135] | 07-SRNP-1460  | 669[0n]bp |
| Carrhenes canescensDHJ01 | [1136] | 06-SRNP-59186 | 669[0n]bp |
| Carrhenes canescensDHJ01 | [1137] | 06-SRNP-3104  | 669[0n]bp |
| Carrhenes canescensDHJ01 | [1138] | 06-SRNP-2357  | 669[0n]bp |
| Carrhenes canescensDHJ01 | [1139] | 06-SRNP-3298  | 669[0n]bp |
| Carrhenes canescensDHJ01 | [1140] | 04-SRNP-35258 | 669[0n]bp |
| Carrhenes canescensDHJ01 | [1141] | 00-SRNP-1813  | 669[0n]bp |
| Carrhenes canescensDHJ01 | [1142] | 04-SRNP-48517 | 669[0n]bp |
| Carrhenes canescensDHJ01 | [1143] | 05-SRNP-65401 | 522[0n]bp |
| Carrhenes canescensDHJ01 | [1144] | 98-SRNP-6890  | 654[0n]bp |
| Carrhenes canescensDHJ01 | [1145] | 97-SRNP-6031  | 669[0n]bp |
| Atarnes sallei           | [1146] | 06-SRNP-45182 | 669[0n]bp |
| Atarnes sallei           | [1147] | 06-SRNP-1582  | 669[0n]bp |
| Atarnes sallei           | [1148] | 07-SRNP-35256 | 669[0n]bp |
| Atarnes sallei           | [1149] | 08-SRNP-20794 | 669[0n]bp |
| Atarnes sallei           | [1150] | 06-SRNP-3263  | 669[0n]bp |
| Atarnes sallei           | [1151] | 05-SRNP-2058  | 687[0n]bp |
| Atarnes sallei           | [1152] | 08-SRNP-36067 | 669[0n]bp |
| Atarnes sallei           | [1153] | 08-SRNP-56142 | 669[0n]bp |
| Atarnes sallei           | [1154] | 07-SRNP-58936 | 669[0n]bp |
| Atarnes sallei           | [1155] | 07-SRNP-59529 | 669[0n]bp |
| Atarnes sallei           | [1156] | 06-SRNP-18572 | 669[0n]bp |
| Atarnes sallei           | [1157] | 06-SRNP-59199 | 669[0n]bp |
| Atarnes sallei           | [1158] | 06-SRNP-3340  | 669[0n]bp |
| Atarnes sallei           | [1159] | 06-SRNP-35204 | 618[5n]bp |
| Atarnes sallei           | [1160] | 05-SRNP-60344 | 630[0n]bp |
| Atarnes sallei           | [1161] | 05-SRNP-61255 | 627[0n]bp |
| Atarnes sallei           | [1162] | 05-SRNP-60346 | 627[1n]bp |
| Atarnes sallei           | [1163] | 06-SRNP-55198 | 591[0n]bp |
| Atarnes sallei           | [1164] | 95-SRNP-435   | 576[1n]bp |
| Atarnes sallei           | [1165] | 89-SRNP-92    | 357[0n]bp |
| Atarnes sallei           | [1166] | 06-SRNP-21052 | 363[0n]bp |
| Atarnes sallei           | [1167] | 06-SRNP-21070 | 603[2n]bp |
| Atarnes sallei           | [1168] | 06-SRNP-57921 | 612[0n]bp |
| Atarnes sallei           | [1169] | 07-SRNP-56900 | 621[0n]bp |
| Atarnes sallei           | [1170] | 07-SRNP-65059 | 621[0n]bp |
| Atarnes sallei           | [1171] | 07-SRNP-65058 | 669[0n]bp |
| Atarnes sallei           | [1172] | 08-SRNP-56256 | 669[0n]bp |
| Potamanaxas unifasciata  | [1173] | 07-SRNP-2633  | 633[0n]bp |
| Potamanaxas unifasciata  | [1174] | 98-SRNP-2034  | 669[0n]bp |
| Potamanaxas unifasciata  | [1175] | 04-SRNP-805   | 669[0n]bp |
| Potamanaxas unifasciata  | [1176] | 05-SRNP-58611 | 669[0n]bp |
| Potamanaxas unifasciata  | [1177] | 05-SRNP-35001 | 669[0n]bp |
| Potamanaxas unifasciata  | [1178] | 94-SRNP-6414  | 669[0n]bp |
| Potamanaxas unifasciata  | [1179] | 00-SRNP-12802 | 669[0n]bp |
| Potamanaxas unifasciata  | [1180] | 00-SRNP-12804 | 669[0n]bp |
| Potamanaxas unifasciata  | [1181] | 04-SRNP-363   | 669[0n]bp |
| Potamanaxas unifasciata  | [1182] | 04-SRNP-365   | 669[0n]bp |
| Potamanaxas unifasciata  | [1183] | 00-SRNP-12805 | 669[0n]bp |
| Potamanaxas unifasciata  | [1184] | 04-SRNP-496   | 669[1n]bp |
| Potamanaxas unifasciata  | [1185] | 98-SRNP-2036  | 669[0n]bp |
| Potamanaxas unifasciata  | [1186] | 04-SRNP-364   | 669[0n]bp |
| Potamanaxas unifasciata  | [1187] | 95-SRNP-433   | 630[0n]bp |
| Potamanaxas unifasciata  | [1188] | 95-SRNP-437   | 576[1n]bp |
| Potamanaxas unifasciata  | [1189] | 95-SRNP-441   | 603[0n]bp |
| Potamanaxas unifasciata  | [1190] | 95-SRNP-436   | 603[0n]bp |
| Potamanaxas unifasciata  | [1191] | 95-SRNP-438   | 558[0n]bp |
| Potamanaxas unifasciata  | [1192] | 03-SRNP-4147  | 564[0n]bp |
| Potamanaxas unifasciata  | [1193] | 03-SRNP-5425  | 570[0n]bp |
| Potamanaxas unifasciata  | [1194] | 00-SRNP-12803 | 633[0n]bp |
| Potamanaxas unifasciata  | [1195] | 06-SRNP-21553 | 633[0n]bp |
| Potamanaxas unifasciata  | [1196] | 04-SRNP-2128  | 669[0n]bp |
| Potamanaxas unifasciata  | [1197] | 05-SRNP-35251 | 669[0n]bp |
| Potamanaxas unifasciata  | [1198] | 08-SRNP-56559 | 669[0n]bp |
| Milanesia marciata       | [1199] | 07-SRNP-41972 | 606[0n]bp |

```

Potamanaxas unifasciata [1198] | 08-SRNP-56559 | 669 [0n] bp
Milanion marciana [1199] | 07-SRNP-41972 | 606 [0n] bp
Milanion marciana [1200] | 07-SRNP-1128 | 669 [0n] bp
Milanion marciana [1201] | 04-SRNP-41660 | 669 [0n] bp
Milanion marciana [1202] | 04-SRNP-42477 | 669 [0n] bp
Milanion marciana [1203] | 05-SRNP-188 | 669 [0n] bp
Milanion marciana [1204] | 01-SRNP-5343 | 630 [0n] bp
Milanion marciana [1205] | 01-SRNP-5185 | 642 [0n] bp
Milanion marciana [1206] | 04-SRNP-41204 | 366 [0n] bp
Milanion marciana [1207] | 04-SRNP-42614 | 669 [0n] bp
Milanion marciana [1208] | 05-SRNP-41228 | 669 [0n] bp
Milanion marciana [1209] | 07-SRNP-42347 | 669 [0n] bp
Milanion marciana [1210] | 09-SRNP-42042 | 669 [0n] bp
Pythonides amaryllis [1211] | 06-SRNP-7522 | 669 [0n] bp
Pythonides amaryllis [1212] | 07-SRNP-2293 | 669 [0n] bp
Pythonides amaryllis [1213] | 07-SRNP-45416 | 669 [0n] bp
Pythonides amaryllis [1214] | 06-SRNP-65338 | 669 [0n] bp
Pythonides amaryllis [1215] | 07-SRNP-2936 | 669 [0n] bp
Pythonides amaryllis [1216] | 07-SRNP-65576 | 669 [0n] bp
Pythonides amaryllis [1217] | 08-SRNP-70591 | 669 [0n] bp
Pythonides amaryllis [1218] | 07-SRNP-296 | 669 [0n] bp
Pythonides amaryllis [1219] | 02-SRNP-547 | 630 [0n] bp
Pythonides amaryllis [1220] | 07-SRNP-45759 | 669 [0n] bp
Pythonides amaryllis [1221] | 07-SRNP-45350 | 669 [0n] bp
Pythonides amaryllis [1222] | 07-SRNP-41120 | 669 [0n] bp
Pythonides amaryllis [1223] | 07-SRNP-2294 | 669 [0n] bp
Pythonides amaryllis [1224] | 07-SRNP-949 | 669 [0n] bp
Pythonides amaryllis [1225] | 07-SRNP-30555 | 669 [0n] bp
Pythonides amaryllis [1226] | 07-SRNP-30884 | 669 [0n] bp
Pythonides amaryllis [1227] | 06-SRNP-65311 | 669 [0n] bp
Pythonides amaryllis [1228] | 06-SRNP-6930 | 669 [0n] bp
Pythonides amaryllis [1229] | 06-SRNP-9220 | 669 [0n] bp
Pythonides amaryllis [1230] | 06-SRNP-65571 | 645 [0n] bp
Pythonides amaryllis [1231] | 06-SRNP-7674 | 645 [0n] bp
Pythonides amaryllis [1232] | 02-SRNP-6320 | 645 [0n] bp
Pythonides amaryllis [1233] | 07-SRNP-45758 | 666 [0n] bp
Pythonides amaryllis [1234] | 06-SRNP-9644 | 648 [0n] bp
Pythonides amaryllis [1235] | 07-SRNP-45250 | 657 [0n] bp
Pythonides amaryllis [1236] | 07-SRNP-65279 | 657 [0n] bp
Pythonides amaryllis [1237] | 08-SRNP-70034 | 621 [0n] bp
Pythonides amaryllis [1238] | 08-SRNP-71826 | 669 [0n] bp
Pythonides pteras [1239] | 05-SRNP-31884 | 669 [0n] bp
Pythonides pteras [1240] | 05-SRNP-31882 | 669 [0n] bp
Pythonides pteras [1241] | 05-SRNP-32629 | 669 [0n] bp
Pythonides pteras [1242] | 06-SRNP-32649 | 669 [0n] bp
Pythonides pteras [1243] | 06-SRNP-32650 | 669 [0n] bp
Pythonides pteras [1244] | 07-SRNP-32651 | 669 [0n] bp
Morvina fissimacula pelarge [1245] | 07-SRNP-41267 | 645 [0n] bp
Morvina fissimacula pelarge [1246] | 06-SRNP-31970 | 669 [0n] bp
Morvina fissimacula pelarge [1247] | 06-SRNP-31945 | 669 [0n] bp
Morvina fissimacula pelarge [1248] | 06-SRNP-32336 | 666 [0n] bp
Morvina fissimacula pelarge [1249] | 02-SRNP-6631 | 657 [0n] bp
Morvina fissimacula pelarge [1250] | 02-SRNP-6922 | 657 [0n] bp
Morvina fissimacula pelarge [1251] | 06-SRNP-33952 | 660 [0n] bp
Morvina fissimacula pelarge [1252] | 06-SRNP-34246 | 654 [2n] bp
Morvina fissimacula pelarge [1253] | 06-SRNP-34680 | 669 [0n] bp
Morvina fissimacula pelarge [1254] | 06-SRNP-65215 | 669 [0n] bp
Morvina fissimacula pelarge [1255] | 04-SRNP-2511 | 669 [0n] bp
Morvina fissimacula pelarge [1256] | 08-SRNP-65933 | 669 [0n] bp
Ouleus cyrna [1257] | 03-SRNP-22100 | 669 [1n] bp
Ouleus cyrna [1258] | 00-SRNP-23507 | 564 [1n] bp
Ouleus cyrna [1259] | 03-SRNP-22212 | 633 [0n] bp
Ouleus cyrna [1260] | 06-SRNP-35224 | 666 [0n] bp
Zera hosta [1261] | 02-SRNP-24501 | 642 [0n] bp
Zera hosta [1262] | 02-SRNP-24500 | 639 [0n] bp
Zera hosta [1263] | 03-SRNP-3007 | 669 [0n] bp
Zera hosta [1264] | 03-SRNP-3008 | 669 [0n] bp
Zera hosta [1265] | 02-SRNP-24498 | 669 [0n] bp
Zera Burns01DHJ03 [1266] | 07-SRNP-41866 | 669 [0n] bp
Zera Burns01DHJ03 [1267] | 06-SRNP-6823 | 624 [0n] bp
Zera Burns01DHJ03 [1268] | 08-SRNP-4248 | 669 [1n] bp
Zera Burns01DHJ02 [1269] | 06-SRNP-22961 | 669 [0n] bp
Zera Burns01DHJ02 [1270] | 06-SRNP-9109 | 669 [0n] bp
Zera Burns01DHJ02 [1271] | 06-SRNP-9107 | 669 [0n] bp
Zera Burns01DHJ02 [1272] | 06-SRNP-9105 | 669 [0n] bp
Zera Burns01DHJ02 [1273] | 02-SRNP-24499 | 669 [0n] bp
Zera Burns01DHJ02 [1274] | 02-SRNP-24503 | 669 [0n] bp
Zera Burns01DHJ02 [1275] | 02-SRNP-4228 | 669 [0n] bp
Zera Burns01DHJ02 [1276] | 05-SRNP-23870 | 669 [0n] bp
Zera Burns01DHJ02 [1277] | 05-SRNP-55739 | 669 [0n] bp
Zera Burns01DHJ02 [1278] | 06-SRNP-9106 | 663 [0n] bp
Zera Burns01DHJ02 [1279] | 07-SRNP-32559 | 645 [0n] bp
Zera Burns01DHJ02 [1280] | 07-SRNP-3659 | 669 [0n] bp
Zera Burns01DHJ02 [1281] | 08-SRNP-56931 | 669 [0n] bp
Zera Burns01DHJ02 [1282] | 08-SRNP-56930 | 669 [0n] bp
Gindanes brontinus [1283] | 08-SRNP-57236 | 669 [0n] bp
Gindanes brontinus [1284] | 06-SRNP-58321 | 669 [0n] bp
Gindanes brontinus [1285] | 05-SRNP-63509 | 669 [0n] bp
Gindanes brontinus [1286] | 05-SRNP-65501 | 669 [0n] bp
Gindanes brontinus [1287] | 04-SRNP-14564 | 669 [0n] bp
Gindanes brontinus [1288] | 04-SRNP-14565 | 669 [0n] bp
Gindanes brontinus [1289] | 94-SRNP-15.1 | 399 [0n] bp
Gindanes brontinus [1290] | 94-SRNP-10 | 627 [0n] bp
Gindanes brontinus [1291] | 04-SRNP-14563 | 630 [0n] bp
Gindanes brontinus [1292] | 05-SRNP-64401 | 630 [0n] bp
Gindanes brontinus [1293] | 05-SRNP-65494 | 630 [0n] bp
Gindanes brontinus [1294] | 08-SRNP-57426 | 669 [0n] bp
Pythonides proxenus [1295] | 07-SRNP-42356 | 666 [0n] bp
Pythonides proxenus [1296] | 06-SRNP-6782 | 669 [0n] bp
Pythonides proxenus [1297] | 06-SRNP-23081 | 669 [0n] bp
Pythonides proxenus [1298] | 04-SRNP-41615 | 669 [0n] bp
Pythonides proxenus [1299] | 04-SRNP-26794 | 669 [1n] bp

```

```

Pythonides proxenus|[1297]|07-SRNP-23001|669[0n]bp
Pythonides proxenus|[1298]|04-SRNP-41615|669[0n]bp
Pythonides proxenus|[1299]|04-SRNP-26794|669[1n]bp
Pythonides proxenus|[1300]|02-SRNP-20155|645[0n]bp
Pythonides proxenus|[1301]|02-SRNP-20156|630[0n]bp
Pythonides proxenus|[1302]|07-SRNP-21605|669[0n]bp
Pythonides proxenus|[1303]|07-SRNP-21699|669[0n]bp
Pythonides proxenus|[1304]|08-SRNP-40390|585[0n]bp
Pythonides proxenus|[1305]|09-SRNP-22673|669[0n]bp
Pythonides proxenus|[1306]|04-SRNP-26795|687[0n]bp
Pythonides proxenus|[1307]|06-SRNP-44676|669[0n]bp
Pythonides proxenus|[1308]|07-SRNP-3103|669[0n]bp
Pythonides proxenus|[1309]|06-SRNP-36323|669[0n]bp
Pythonides proxenus|[1310]|06-SRNP-44677|669[0n]bp
Pythonides proxenus|[1311]|06-SRNP-43506|669[0n]bp
Pythonides proxenus|[1312]|06-SRNP-22943|669[0n]bp
Pythonides proxenus|[1313]|04-SRNP-60627|669[0n]bp
Pythonides proxenus|[1314]|04-SRNP-45116|669[0n]bp
Pythonides proxenus|[1315]|08-SRNP-1431|669[0n]bp
Pythonides proxenus|[1316]|09-SRNP-20219|669[0n]bp
Pythonides proxenus|[1317]|09-SRNP-20218|669[0n]bp
Pythonides proxenus|[1318]|09-SRNP-20220|669[0n]bp
Quadrus francesius|[1319]|04-SRNP-3839|669[0n]bp
Quadrus francesius|[1320]|04-SRNP-4110|669[0n]bp
Quadrus francesius|[1321]|06-SRNP-7067|669[0n]bp
Quadrus francesius|[1322]|06-SRNP-7066|669[0n]bp
Quadrus francesius|[1323]|08-SRNP-4233|669[0n]bp
Quadrus francesius|[1324]|08-SRNP-4232|669[0n]bp
Quadrus francesius|[1325]|05-SRNP-5074|669[0n]bp
Quadrus francesius|[1326]|05-SRNP-31504|669[0n]bp
Quadrus francesius|[1327]|04-SRNP-2313|669[0n]bp
Quadrus francesius|[1328]|07-SRNP-21126|645[0n]bp
Quadrus francesius|[1329]|05-SRNP-21430|669[0n]bp
Quadrus francesius|[1330]|05-SRNP-60|669[0n]bp
Quadrus francesius|[1331]|05-SRNP-62|669[0n]bp
Quadrus francesius|[1332]|04-SRNP-4111|669[0n]bp
Quadrus francesius|[1333]|05-SRNP-30292|669[0n]bp
Quadrus francesius|[1334]|04-SRNP-3262|669[0n]bp
Quadrus francesius|[1335]|03-SRNP-5537|663[0n]bp
Quadrus francesius|[1336]|03-SRNP-5745|633[0n]bp
Quadrus francesius|[1337]|08-SRNP-30995|621[0n]bp
Quadrus francesius|[1338]|09-SRNP-80528|669[0n]bp
Quadrus contubernalis|[1339]|01-SRNP-2577|630[0n]bp
Quadrus contubernalis|[1340]|07-SRNP-2968|669[0n]bp
Quadrus contubernalis|[1341]|08-SRNP-794|669[0n]bp
Quadrus contubernalis|[1342]|04-SRNP-3684|669[0n]bp
Quadrus contubernalis|[1343]|04-SRNP-3683|669[0n]bp
Quadrus contubernalis|[1344]|04-SRNP-60962|669[0n]bp
Quadrus contubernalis|[1345]|04-SRNP-4515|669[0n]bp
Quadrus contubernalis|[1346]|04-SRNP-4514|669[0n]bp
Quadrus contubernalis|[1347]|04-SRNP-3680|669[0n]bp
Quadrus contubernalis|[1348]|02-SRNP-19658|657[0n]bp
Quadrus contubernalis|[1349]|04-SRNP-60961|627[0n]bp
Quadrus contubernalis|[1350]|06-SRNP-2063|627[0n]bp
Quadrus contubernalis|[1351]|06-SRNP-2062|669[0n]bp
Quadrus contubernalis|[1352]|06-SRNP-2192|669[0n]bp
Quadrus contubernalis|[1353]|06-SRNP-3969|669[0n]bp
Quadrus contubernalis|[1354]|06-SRNP-7060|669[0n]bp
Quadrus contubernalis|[1355]|06-SRNP-7061|669[0n]bp
Quadrus contubernalis|[1356]|07-SRNP-1429|669[0n]bp
Quadrus contubernalis|[1357]|07-SRNP-2969|669[0n]bp
Quadrus contubernalis|[1358]|08-SRNP-793|669[0n]bp
Ouleus dilla baruDHJ01|[1359]|02-SRNP-29|669[0n]bp
Ouleus dilla baruDHJ01|[1360]|05-SRNP-34972|669[0n]bp
Ouleus dilla baruDHJ01|[1361]|06-SRNP-44270|669[0n]bp
Ouleus dilla baruDHJ01|[1362]|08-SRNP-40639|669[0n]bp
Ouleus dilla baruDHJ02|[1363]|05-SRNP-314|669[1n]bp
Ouleus dilla baruDHJ02|[1364]|04-SRNP-40712|669[0n]bp
Ouleus dilla baruDHJ02|[1365]|04-SRNP-4906|669[0n]bp
Ouleus dilla baruDHJ02|[1366]|04-SRNP-42883|669[0n]bp
Ouleus dilla baruDHJ02|[1367]|04-SRNP-3168|669[0n]bp
Ouleus dilla baruDHJ02|[1368]|03-SRNP-5456|669[0n]bp
Ouleus dilla baruDHJ02|[1369]|01-SRNP-25074|669[0n]bp
Ouleus dilla baruDHJ02|[1370]|02-SRNP-21428|666[0n]bp
Ouleus dilla baruDHJ02|[1371]|02-SRNP-18307|666[0n]bp
Ouleus dilla baruDHJ02|[1372]|03-SRNP-5228|630[1n]bp
Ouleus dilla baruDHJ02|[1373]|02-SRNP-1148|576[0n]bp
Ouleus dilla baruDHJ02|[1374]|05-SRNP-41777|669[1n]bp
Ouleus dilla baruDHJ02|[1375]|05-SRNP-30721|669[0n]bp
Ouleus dilla baruDHJ02|[1376]|05-SRNP-7449|669[0n]bp
Ouleus dilla baruDHJ02|[1377]|06-SRNP-31341|669[0n]bp
Ouleus dilla baruDHJ02|[1378]|07-SRNP-42528|669[0n]bp
Ouleus dilla baruDHJ02|[1379]|08-SRNP-72306|669[0n]bp
Ouleus dilla baruDHJ02|[1380]|08-SRNP-72304|669[0n]bp
Ouleus dilla baruDHJ02|[1381]|09-SRNP-80444|669[0n]bp
Ouleus Burns01|[1382]|04-SRNP-4356|669[0n]bp
Ouleus Burns01|[1383]|03-SRNP-5719|627[2n]bp
Ouleus Burns01|[1384]|06-SRNP-45127|669[1n]bp
Ouleus Burns01|[1385]|06-SRNP-8586|669[0n]bp
Ouleus Burns01|[1386]|06-SRNP-8585|669[0n]bp
Ouleus negrus|[1387]|04-SRNP-491|669[0n]bp
Ouleus negrus|[1388]|98-SRNP-6834|516[0n]bp
Ouleus negrus|[1389]|02-SRNP-2323|669[0n]bp
Ouleus negrus|[1390]|02-SRNP-5597|576[0n]bp
Ouleus negrus|[1391]|00-SRNP-162|606[0n]bp
Ouleus negrus|[1392]|03-SRNP-34272|645[3n]bp
Ouleus negrus|[1393]|03-SRNP-6700|660[0n]bp
Ouleus negrus|[1394]|00-SRNP-14610|669[1n]bp
Ouleus negrus|[1395]|07-SRNP-2215|669[0n]bp
Ouleus negrus|[1396]|07-SRNP-2470|669[0n]bp
Quadrus cerialisDHJ01|[1397]|08-SRNP-65628|669[0n]bp
Quadrus cerialisDHJ02|[1398]|08-SRNP-70040|669[4n]bp
Quadrus cerialisDHJ03|[1399]|04-SRNP-55879|669[2n]bp

```

Quadrus cerialisDHJ02|[1398]|08-SRNP-70040|669[4n]bp  
 Quadrus cerialisDHJ03|[1399]|04-SRNP-55879|669[2n]bp  
 Quadrus cerialisDHJ03|[1400]|04-SRNP-55680|669[0n]bp  
 Quadrus cerialisDHJ03|[1401]|07-SRNP-65780|669[0n]bp  
 Quadrus cerialisDHJ03|[1402]|05-SRNP-32312|669[0n]bp  
 Quadrus cerialisDHJ03|[1403]|05-SRNP-32317|669[0n]bp  
 Quadrus cerialisDHJ03|[1404]|04-SRNP-49439|669[0n]bp  
 Quadrus cerialisDHJ03|[1405]|04-SRNP-49987|669[0n]bp  
 Quadrus cerialisDHJ03|[1406]|04-SRNP-15284|669[0n]bp  
 Quadrus cerialisDHJ03|[1407]|04-SRNP-49389|669[0n]bp  
 Quadrus cerialisDHJ03|[1408]|04-SRNP-23614|669[1n]bp  
 Quadrus cerialisDHJ03|[1409]|07-SRNP-66046|660[0n]bp  
 Quadrus cerialisDHJ03|[1410]|05-SRNP-31921|627[1n]bp  
 Quadrus cerialisDHJ03|[1411]|03-SRNP-3074|642[0n]bp  
 Quadrus cerialisDHJ03|[1412]|08-SRNP-40247|648[1n]bp  
 Quadrus cerialisDHJ03|[1413]|03-SRNP-3037|657[0n]bp  
 Quadrus cerialisDHJ03|[1414]|08-SRNP-40381|618[0n]bp  
 Quadrus cerialisDHJ03|[1415]|08-SRNP-45059|669[0n]bp  
 Quadrus cerialisDHJ03|[1416]|08-SRNP-1036|669[0n]bp  
 Quadrus cerialisDHJ03|[1417]|08-SRNP-70469|669[0n]bp  
 Quadrus cerialisDHJ03|[1418]|08-SRNP-65398|669[0n]bp  
 Quadrus cerialisDHJ03|[1419]|04-SRNP-49986|669[1n]bp  
 Quadrus cerialisDHJ03|[1420]|06-SRNP-36670|669[0n]bp  
 Quadrus cerialisDHJ03|[1421]|06-SRNP-3782|669[0n]bp  
 Quadrus cerialisDHJ03|[1422]|04-SRNP-14171|669[0n]bp  
 Quadrus cerialisDHJ03|[1423]|04-SRNP-23615|669[0n]bp  
 Quadrus cerialisDHJ03|[1424]|04-SRNP-15266|669[0n]bp  
 Quadrus cerialisDHJ03|[1425]|04-SRNP-56788|669[0n]bp  
 Quadrus cerialisDHJ03|[1426]|08-SRNP-65058|618[0n]bp  
 Quadrus cerialisDHJ03|[1427]|08-SRNP-2098|669[0n]bp  
 Quadrus cerialisDHJ03|[1428]|08-SRNP-71737|669[0n]bp  
 Quadrus cerialisDHJ03|[1429]|08-SRNP-70012|669[0n]bp  
 Quadrus cerialisDHJ03|[1430]|08-SRNP-1186|669[0n]bp  
 Quadrus cerialisDHJ03|[1431]|08-SRNP-72329|669[0n]bp  
 Quadrus cerialisDHJ03|[1432]|09-SRNP-66024|669[4n]bp  
 Quadrus cerialisDHJ03|[1433]|09-SRNP-75200|669[2n]bp  
 Quadrus cerialisDHJ03|[1434]|08-SRNP-45063|669[1n]bp  
 Quadrus cerialisDHJ03|[1435]|07-SRNP-66047|669[1n]bp  
 Quadrus cerialisDHJ03|[1436]|05-SRNP-32596|669[0n]bp  
 Quadrus cerialisDHJ03|[1437]|07-SRNP-42399|660[0n]bp  
 Quadrus cerialisDHJ03|[1438]|08-SRNP-70496|669[0n]bp  
 Quadrus cerialisDHJ03|[1439]|08-SRNP-65610|669[2n]bp  
 Quadrus cerialisDHJ03|[1440]|08-SRNP-72231|669[1n]bp  
 Quadrus cerialisDHJ03|[1441]|08-SRNP-72232|669[1n]bp  
 Quadrus cerialisDHJ03|[1442]|09-SRNP-80394|669[1n]bp  
 Quadrus lugubris|[1443]|06-SRNP-55695|630[0n]bp  
 Quadrus lugubris|[1444]|06-SRNP-59481|621[1n]bp  
 Quadrus lugubris|[1445]|06-SRNP-18855|603[1n]bp  
 Quadrus lugubris|[1446]|06-SRNP-20192|633[1n]bp  
 Quadrus lugubris|[1447]|03-SRNP-3179|642[0n]bp  
 Quadrus lugubris|[1448]|06-SRNP-46983|645[0n]bp  
 Quadrus lugubris|[1449]|06-SRNP-46868|630[0n]bp  
 Quadrus lugubris|[1450]|06-SRNP-59203|669[0n]bp  
 Quadrus lugubris|[1451]|06-SRNP-18688|669[0n]bp  
 Quadrus lugubris|[1452]|08-SRNP-57856|669[0n]bp  
 Ouleus salvinaDHJ02|[1453]|06-SRNP-59480|669[0n]bp  
 Ouleus salvinaDHJ02|[1454]|09-SRNP-44396|666[0n]bp  
 Ouleus salvinaDHJ02|[1455]|09-SRNP-44315|669[0n]bp  
 Ouleus salvinaDHJ02|[1456]|09-SRNP-68013|669[0n]bp  
 Ouleus salvinaDHJ02|[1457]|07-SRNP-41960|669[0n]bp  
 Ouleus salvinaDHJ02|[1458]|09-SRNP-67763|669[0n]bp  
 Ouleus salvinaDHJ02|[1459]|06-SRNP-42461|669[0n]bp  
 Ouleus salvinaDHJ02|[1460]|06-SRNP-55683|669[0n]bp  
 Ouleus salvinaDHJ02|[1461]|04-SRNP-41470|669[0n]bp  
 Ouleus salvinaDHJ02|[1462]|02-SRNP-14934|570[0n]bp  
 Ouleus salvinaDHJ02|[1463]|02-SRNP-3943|567[0n]bp  
 Ouleus salvinaDHJ02|[1464]|95-SRNP-117|591[1n]bp  
 Ouleus salvinaDHJ02|[1465]|04-SRNP-41611|627[0n]bp  
 Ouleus salvinaDHJ02|[1466]|05-SRNP-55605|669[0n]bp  
 Ouleus salvinaDHJ02|[1467]|05-SRNP-55640|669[0n]bp  
 Ouleus salvinaDHJ02|[1468]|00-SRNP-20778|669[0n]bp  
 Ouleus salvinaDHJ02|[1469]|06-SRNP-55688|669[0n]bp  
 Ouleus salvinaDHJ02|[1470]|07-SRNP-312|669[0n]bp  
 Ouleus salvinaDHJ02|[1471]|07-SRNP-55498|669[0n]bp  
 Ouleus salvinaDHJ02|[1472]|07-SRNP-55500|669[0n]bp  
 Ouleus salvinaDHJ02|[1473]|07-SRNP-55682|669[0n]bp  
 Ouleus salvinaDHJ02|[1474]|07-SRNP-55748|669[0n]bp  
 Ouleus salvinaDHJ02|[1475]|07-SRNP-55742|669[0n]bp  
 Ouleus salvinaDHJ02|[1476]|07-SRNP-55810|669[0n]bp  
 Ouleus salvinaDHJ02|[1477]|07-SRNP-55828|669[0n]bp  
 Ouleus salvinaDHJ02|[1478]|07-SRNP-55829|669[0n]bp  
 Ouleus salvinaDHJ02|[1479]|09-SRNP-75766|669[0n]bp  
 Ouleus salvinaDHJ01|[1480]|06-SRNP-59753|669[0n]bp  
 Ouleus salvinaDHJ01|[1481]|07-SRNP-56446|669[0n]bp  
 Ouleus salvinaDHJ01|[1482]|07-SRNP-55582|669[0n]bp  
 Ouleus salvinaDHJ01|[1483]|07-SRNP-55584|669[0n]bp  
 Ouleus salvinaDHJ01|[1484]|07-SRNP-55693|660[0n]bp  
 Ouleus salvinaDHJ01|[1485]|09-SRNP-65468|660[0n]bp  
 Ouleus salvinaDHJ01|[1486]|07-SRNP-42350|669[0n]bp  
 Ouleus salvinaDHJ01|[1487]|08-SRNP-70345|669[0n]bp  
 Ouleus salvinaDHJ01|[1488]|08-SRNP-70346|669[0n]bp  
 Ouleus salvinaDHJ01|[1489]|09-SRNP-70105|669[0n]bp  
 Ouleus salvinaDHJ01|[1490]|09-SRNP-68071|669[0n]bp  
 Ouleus salvinaDHJ01|[1491]|06-SRNP-31160|633[0n]bp  
 Ouleus salvinaDHJ01|[1492]|06-SRNP-55656|669[0n]bp  
 Ouleus salvinaDHJ01|[1493]|06-SRNP-55943|669[0n]bp  
 Ouleus salvinaDHJ01|[1494]|06-SRNP-55655|669[0n]bp  
 Ouleus salvinaDHJ01|[1495]|09-SRNP-68307|669[0n]bp  
 Ouleus salvinaDHJ01|[1496]|08-SRNP-55837|669[0n]bp  
 Ouleus salvinaDHJ01|[1497]|08-SRNP-55820|669[0n]bp  
 Ouleus salvinaDHJ01|[1498]|05-SRNP-21647|669[0n]bp  
 Ouleus salvinaDHJ01|[1499]|05-SRNP-55686|669[0n]bp  
 Ouleus salvinaDHJ01|[1500]|08-SRNP-68024|669[0n]bp



Ouleus salvinaDHJ01|[1497]|05-SRNP-55820|669[0n]bp  
 Ouleus salvinaDHJ01|[1498]|05-SRNP-21647|669[0n]bp  
 Ouleus salvinaDHJ01|[1499]|05-SRNP-55686|669[0n]bp  
 Ouleus salvinaDHJ01|[1500]|09-SRNP-67934|669[0n]bp  
 Ouleus salvinaDHJ01|[1501]|07-SRNP-55569|642[0n]bp  
 Ouleus salvinaDHJ01|[1502]|02-SRNP-14802|660[0n]bp  
 Ouleus salvinaDHJ01|[1503]|09-SRNP-75801|633[0n]bp  
 Ouleus salvinaDHJ01|[1504]|07-SRNP-41975|669[0n]bp  
 Ouleus salvinaDHJ01|[1505]|06-SRNP-6666|669[0n]bp  
 Ouleus salvinaDHJ01|[1506]|06-SRNP-42460|669[0n]bp  
 Ouleus salvinaDHJ01|[1507]|05-SRNP-55394|669[0n]bp  
 Ouleus salvinaDHJ01|[1508]|05-SRNP-55393|669[0n]bp  
 Ouleus salvinaDHJ01|[1509]|05-SRNP-55399|669[0n]bp  
 Ouleus salvinaDHJ01|[1510]|04-SRNP-41462|669[0n]bp  
 Ouleus salvinaDHJ01|[1511]|04-SRNP-41847|669[0n]bp  
 Ouleus salvinaDHJ01|[1512]|04-SRNP-31499|630[0n]bp  
 Ouleus salvinaDHJ01|[1513]|02-SRNP-14703|576[0n]bp  
 Ouleus salvinaDHJ01|[1514]|02-SRNP-14705|576[0n]bp  
 Ouleus salvinaDHJ01|[1515]|02-SRNP-4232|591[0n]bp  
 Ouleus salvinaDHJ01|[1516]|02-SRNP-14805|600[0n]bp  
 Ouleus salvinaDHJ01|[1517]|03-SRNP-34140|594[0n]bp  
 Ouleus salvinaDHJ01|[1518]|06-SRNP-31161|627[0n]bp  
 Ouleus salvinaDHJ01|[1519]|07-SRNP-21111|645[0n]bp  
 Ouleus salvinaDHJ01|[1520]|07-SRNP-21258|645[0n]bp  
 Ouleus salvinaDHJ01|[1521]|07-SRNP-65146|669[0n]bp  
 Ouleus salvinaDHJ01|[1522]|07-SRNP-65555|669[0n]bp  
 Ouleus salvinaDHJ01|[1523]|08-SRNP-65516|669[0n]bp  
 Ouleus salvinaDHJ01|[1524]|08-SRNP-2541|669[0n]bp  
 Ouleus salvinaDHJ01|[1525]|09-SRNP-20454|669[0n]bp  
 Ouleus salvinaDHJ01|[1526]|09-SRNP-80738|669[0n]bp  
 Eracon lachesis|[1527]|05-SRNP-32007|669[0n]bp  
 Eracon lachesis|[1528]|05-SRNP-47074|669[0n]bp  
 Eracon lachesis|[1529]|05-SRNP-33238|645[0n]bp  
 Eracon lachesis|[1530]|08-SRNP-40919|669[0n]bp  
 Eracon lachesis|[1531]|07-SRNP-32478|636[0n]bp  
 Eracon lachesis|[1532]|04-SRNP-56232|669[0n]bp  
 Eracon lachesis|[1533]|06-SRNP-65850|669[0n]bp  
 Eracon lachesis|[1534]|07-SRNP-45762|615[0n]bp  
 Eracon lachesis|[1535]|09-SRNP-55623|669[0n]bp  
 Eracon lachesis|[1536]|09-SRNP-31097|669[0n]bp  
 Eracon lachesis|[1537]|08-SRNP-40965|669[0n]bp  
 Eracon lachesis|[1538]|08-SRNP-31173|669[0n]bp  
 Eracon lachesis|[1539]|08-SRNP-40962|669[0n]bp  
 Eracon lachesis|[1540]|07-SRNP-45763|669[0n]bp  
 Eracon lachesis|[1541]|07-SRNP-32129|669[0n]bp  
 Eracon lachesis|[1542]|06-SRNP-31728|669[0n]bp  
 Eracon lachesis|[1543]|05-SRNP-31900|669[0n]bp  
 Eracon lachesis|[1544]|05-SRNP-31902|669[0n]bp  
 Eracon lachesis|[1545]|05-SRNP-47073|669[0n]bp  
 Eracon lachesis|[1546]|05-SRNP-47071|669[0n]bp  
 Eracon lachesis|[1547]|05-SRNP-47487|669[0n]bp  
 Eracon lachesis|[1548]|05-SRNP-3998|669[0n]bp  
 Eracon lachesis|[1549]|05-SRNP-4680|669[0n]bp  
 Eracon lachesis|[1550]|05-SRNP-3997|669[0n]bp  
 Eracon lachesis|[1551]|04-SRNP-55974|669[0n]bp  
 Eracon lachesis|[1552]|04-SRNP-31099|669[0n]bp  
 Eracon lachesis|[1553]|05-SRNP-70315|669[1n]bp  
 Eracon lachesis|[1554]|01-SRNP-1331|576[0n]bp  
 Eracon lachesis|[1555]|07-SRNP-46421|618[1n]bp  
 Eracon lachesis|[1556]|09-SRNP-57098|669[0n]bp  
 Eracon lachesis|[1557]|09-SRNP-58020|669[0n]bp  
 Eracon lachesis|[1558]|09-SRNP-41521|669[0n]bp  
 Tosta niger|[1559]|00-SRNP-9034|570[0n]bp  
 Tosta niger|[1560]|00-SRNP-9020|570[0n]bp  
 Tosta niger|[1561]|04-SRNP-35560|669[0n]bp  
 Tosta niger|[1562]|08-SRNP-36395|669[0n]bp  
 Tosta niger|[1563]|08-SRNP-37594|669[0n]bp  
 Tosta platypterus|[1564]|01-SRNP-25099|528[0n]bp  
 Tosta platypterus|[1565]|04-SRNP-60213|630[0n]bp  
 Tosta platypterus|[1566]|04-SRNP-4462|669[0n]bp  
 Tosta platypterus|[1567]|06-SRNP-6600|669[0n]bp  
 Tosta platypterus|[1568]|06-SRNP-2124|669[0n]bp  
 Tosta platypterus|[1569]|04-SRNP-4497|669[0n]bp  
 Tosta platypterus|[1570]|04-SRNP-42429|669[0n]bp  
 Tosta platypterus|[1571]|04-SRNP-43095|669[0n]bp  
 Tosta platypterus|[1572]|04-SRNP-815|669[0n]bp  
 Tosta platypterus|[1573]|01-SRNP-3610|591[0n]bp  
 Tosta platypterus|[1574]|07-SRNP-315|639[0n]bp  
 Tosta platypterus|[1575]|07-SRNP-41224|669[0n]bp  
 Tosta platypterus|[1576]|07-SRNP-2877|669[0n]bp  
 Tosta platypterus|[1577]|08-SRNP-584|669[0n]bp  
 Tosta platypterus|[1578]|09-SRNP-67348|669[0n]bp  
 Tosta platypterus|[1579]|04-SRNP-55109|669[0n]bp  
 Tosta platypterus|[1580]|04-SRNP-55252|669[0n]bp  
 Tosta platypterus|[1581]|07-SRNP-41435|666[0n]bp  
 Tosta platypterus|[1582]|07-SRNP-3108|666[0n]bp  
 Tosta platypterus|[1583]|07-SRNP-45523|669[1n]bp  
 Tosta platypterus|[1584]|07-SRNP-46134|669[0n]bp  
 Tosta platypterus|[1585]|07-SRNP-45525|669[0n]bp  
 Tosta platypterus|[1586]|08-SRNP-70842|669[0n]bp  
 Tosta platypterus|[1587]|09-SRNP-72364|669[0n]bp  
 Tosta platypterus|[1588]|09-SRNP-72095|669[0n]bp  
 Iliana Burns01|[1589]|07-SRNP-32919|669[0n]bp  
 Iliana Burns01|[1590]|07-SRNP-32830|645[0n]bp  
 Tosta gorgus|[1591]|05-SRNP-64260|669[0n]bp  
 Tosta gorgus|[1592]|05-SRNP-25010|669[0n]bp  
 Tosta gorgus|[1593]|05-SRNP-25011|669[0n]bp  
 Tosta gorgus|[1594]|04-SRNP-14209|669[0n]bp  
 Tosta gorgus|[1595]|04-SRNP-16178|669[0n]bp  
 Tosta gorgus|[1596]|00-SRNP-2772|597[0n]bp  
 Tosta gorgus|[1597]|00-SRNP-2404|594[0n]bp  
 Tosta gorgus|[1598]|08-SRNP-22908|639[0n]bp  
 Cyclosemia Burns01|[1599]|02-SRNP-21532|576[1n]bp  
 Cyclosemia Burns01|[1600]|02-SRNP-31271|620[0n]bp

Tosta gorgus| [1597] |00-SRNP-21941|639[0n]bp  
 Tosta gorgus| [1598] |08-SRNP-22908|639[0n]bp  
 Cyclosemia Burns01| [1599] |02-SRNP-21532|576[1n]bp  
 Cyclosemia Burns01| [1600] |02-SRNP-21274|630[0n]bp  
 Cyclosemia Burns01| [1601] |08-SRNP-70951|669[0n]bp  
 Cyclosemia Burns01| [1602] |08-SRNP-40739|669[0n]bp  
 Cyclosemia Burns01| [1603] |07-SRNP-41474|669[0n]bp  
 Cyclosemia Burns01| [1604] |07-SRNP-32839|669[0n]bp  
 Cyclosemia Burns01| [1605] |07-SRNP-41339|669[0n]bp  
 Cyclosemia Burns01| [1606] |06-SRNP-41379|669[0n]bp  
 Cyclosemia Burns01| [1607] |05-SRNP-33219|669[0n]bp  
 Cyclosemia Burns01| [1608] |05-SRNP-32358|669[0n]bp  
 Cyclosemia Burns01| [1609] |05-SRNP-41022|669[0n]bp  
 Cyclosemia Burns01| [1610] |04-SRNP-56318|669[0n]bp  
 Cyclosemia Burns01| [1611] |05-SRNP-3974|669[0n]bp  
 Cyclosemia Burns01| [1612] |05-SRNP-41706|669[0n]bp  
 Cyclosemia Burns01| [1613] |04-SRNP-42740|669[0n]bp  
 Cyclosemia Burns01| [1614] |07-SRNP-21340|669[0n]bp  
 Cyclosemia Burns01| [1615] |07-SRNP-21976|669[0n]bp  
 Cyclosemia Burns01| [1616] |06-SRNP-30843|657[0n]bp  
 Cyclosemia Burns01| [1617] |07-SRNP-65003|645[0n]bp  
 Cyclosemia Burns01| [1618] |04-SRNP-42705|627[0n]bp  
 Cyclosemia Burns01| [1619] |04-SRNP-42378|627[0n]bp  
 Cyclosemia Burns01| [1620] |04-SRNP-41976|627[0n]bp  
 Cyclosemia Burns01| [1621] |04-SRNP-42926|627[0n]bp  
 Cyclosemia Burns01| [1622] |04-SRNP-55128|627[0n]bp  
 Cyclosemia Burns01| [1623] |04-SRNP-30480|627[0n]bp  
 Cyclosemia Burns01| [1624] |04-SRNP-43086|609[0n]bp  
 Cyclosemia Burns01| [1625] |04-SRNP-42679|591[0n]bp  
 Cyclosemia Burns01| [1626] |07-SRNP-3363|639[0n]bp  
 Cyclosemia Burns01| [1627] |08-SRNP-70207|669[0n]bp  
 Cyclosemia Burns01| [1628] |08-SRNP-70211|669[0n]bp  
 Cyclosemia Burns01| [1629] |08-SRNP-40741|669[0n]bp  
 Cyclosemia Burns01| [1630] |08-SRNP-72009|669[0n]bp  
 Cyclosemia Burns01| [1631] |09-SRNP-70459|669[0n]bp  
 Cyclosemia Burns01| [1632] |09-SRNP-67109|669[0n]bp  
 Cyclosemia Burns01| [1633] |09-SRNP-73946|669[0n]bp  
 Cyclosemia anastomosis| [1634] |04-SRNP-48002|603[1n]bp  
 Cyclosemia anastomosis| [1635] |01-SRNP-464|645[0n]bp  
 Cyclosemia anastomosis| [1636] |01-SRNP-2931|663[0n]bp  
 Cyclosemia anastomosis| [1637] |05-SRNP-41199|669[0n]bp  
 Cyclosemia anastomosis| [1638] |08-SRNP-70103|669[0n]bp  
 Cyclosemia anastomosis| [1639] |08-SRNP-71654|669[0n]bp  
 Cyclosemia anastomosis| [1640] |07-SRNP-42171|669[0n]bp  
 Cyclosemia anastomosis| [1641] |07-SRNP-30971|669[0n]bp  
 Cyclosemia anastomosis| [1642] |05-SRNP-43097|669[0n]bp  
 Cyclosemia anastomosis| [1643] |05-SRNP-34289|669[0n]bp  
 Cyclosemia anastomosis| [1644] |05-SRNP-41292|669[0n]bp  
 Cyclosemia anastomosis| [1645] |05-SRNP-41296|669[0n]bp  
 Cyclosemia anastomosis| [1646] |05-SRNP-45117|669[0n]bp  
 Cyclosemia anastomosis| [1647] |04-SRNP-40770|669[0n]bp  
 Cyclosemia anastomosis| [1648] |05-SRNP-34539|660[0n]bp  
 Cyclosemia anastomosis| [1649] |07-SRNP-45516|666[0n]bp  
 Cyclosemia anastomosis| [1650] |07-SRNP-45515|633[0n]bp  
 Cyclosemia anastomosis| [1651] |07-SRNP-45573|660[0n]bp  
 Cyclosemia anastomosis| [1652] |06-SRNP-43745|657[0n]bp  
 Cyclosemia anastomosis| [1653] |06-SRNP-42938|609[0n]bp  
 Cyclosemia anastomosis| [1654] |06-SRNP-33946|609[0n]bp  
 Cyclosemia anastomosis| [1655] |07-SRNP-2044|654[0n]bp  
 Cyclosemia anastomosis| [1656] |07-SRNP-45517|645[0n]bp  
 Cyclosemia anastomosis| [1657] |07-SRNP-46695|645[0n]bp  
 Cyclosemia anastomosis| [1658] |08-SRNP-72776|648[0n]bp  
 Cyclosemia anastomosis| [1659] |05-SRNP-43883|669[0n]bp  
 Cyclosemia anastomosis| [1660] |09-SRNP-33098|669[0n]bp  
 Cyclosemia subcaerulea| [1661] |06-SRNP-42573|660[0n]bp  
 Cyclosemia subcaerulea| [1662] |02-SRNP-6718|657[0n]bp  
 Cyclosemia subcaerulea| [1663] |02-SRNP-7780|660[0n]bp  
 Cyclosemia subcaerulea| [1664] |06-SRNP-42489|630[1n]bp  
 Cyclosemia subcaerulea| [1665] |07-SRNP-65063|660[0n]bp  
 Cyclosemia subcaerulea| [1666] |09-SRNP-69386|669[0n]bp  
 Pellicia Janzen01| [1667] |05-SRNP-34546|591[0n]bp  
 Pellicia Janzen01| [1668] |08-SRNP-2348|666[0n]bp  
 Pellicia dimidiata| [1669] |06-SRNP-30813|669[0n]bp  
 Pellicia dimidiata| [1670] |93-SRNP-6528|537[0n]bp  
 Pellicia dimidiata| [1671] |06-SRNP-4815|669[0n]bp  
 Pellicia dimidiata| [1672] |06-SRNP-3027|669[0n]bp  
 Pellicia dimidiata| [1673] |06-SRNP-1886|669[0n]bp  
 Pellicia dimidiata| [1674] |06-SRNP-2646|669[0n]bp  
 Pellicia dimidiata| [1675] |06-SRNP-2668|669[0n]bp  
 Pellicia dimidiata| [1676] |05-SRNP-42242|669[0n]bp  
 Pellicia dimidiata| [1677] |04-SRNP-46357|669[0n]bp  
 Pellicia dimidiata| [1678] |02-SRNP-4585|669[0n]bp  
 Pellicia dimidiata| [1679] |93-SRNP-8674|627[0n]bp  
 Pellicia dimidiata| [1680] |07-SRNP-45157|663[0n]bp  
 Pellicia dimidiata| [1681] |07-SRNP-1514|666[0n]bp  
 Pellicia dimidiata| [1682] |07-SRNP-2217|669[0n]bp  
 Pellicia dimidiata| [1683] |08-SRNP-2140|669[0n]bp  
 Pellicia arina| [1684] |04-SRNP-13705|669[0n]bp  
 Pellicia arina| [1685] |03-SRNP-12773.1|669[1n]bp  
 Pellicia arina| [1686] |00-SRNP-4592|669[0n]bp  
 Pellicia arina| [1687] |02-SRNP-32880|669[0n]bp  
 Pellicia arina| [1688] |04-SRNP-15702|669[0n]bp  
 Pellicia arina| [1689] |94-SRNP-139|576[0n]bp  
 Pellicia arina| [1690] |05-SRNP-65245|633[0n]bp  
 Pellicia arina| [1691] |05-SRNP-61204|627[0n]bp  
 Pellicia arina| [1692] |05-SRNP-62646|630[0n]bp  
 Pellicia arina| [1693] |06-SRNP-57936|669[0n]bp  
 Pellicia arina| [1694] |06-SRNP-19742|669[0n]bp  
 Pellicia arina| [1695] |07-SRNP-14674|669[0n]bp  
 Mictris crispus caerulea| [1696] |03-SRNP-18922|492[0n]bp  
 Mictris crispus caerulea| [1697] |05-SRNP-4397|669[0n]bp  
 Mictris crispus caerulea| [1698] |05-SRNP-4032|627[0n]bp  
 Mictris crispus caerulea| [1699] |05-SRNP-3008|669[0n]bp  
 Mictris crispus caerulea| [1700] |05-SRNP-34281|598[0n]bp

|                         |        |               |     |        |
|-------------------------|--------|---------------|-----|--------|
| Mictris crispus caerula | [1697] | 05-SRNP-4032  | 627 | [0n]bp |
| Mictris crispus caerula | [1698] | 05-SRNP-4032  | 627 | [0n]bp |
| Mictris crispus caerula | [1699] | 05-SRNP-3008  | 669 | [0n]bp |
| Mictris crispus caerula | [1700] | 05-SRNP-34281 | 588 | [0n]bp |
| Mictris crispus caerula | [1701] | 07-SRNP-3356  | 660 | [0n]bp |
| Mictris crispus caerula | [1702] | 08-SRNP-40396 | 669 | [0n]bp |
| Mictris crispus caerula | [1703] | 09-SRNP-71308 | 669 | [0n]bp |
| Mictris crispus caerula | [1704] | 07-SRNP-33227 | 669 | [0n]bp |
| Mictris crispus caerula | [1705] | 07-SRNP-32363 | 669 | [0n]bp |
| Mictris crispus caerula | [1706] | 07-SRNP-31656 | 669 | [0n]bp |
| Mictris crispus caerula | [1707] | 07-SRNP-31094 | 669 | [0n]bp |
| Mictris crispus caerula | [1708] | 05-SRNP-34280 | 669 | [0n]bp |
| Mictris crispus caerula | [1709] | 05-SRNP-2161  | 669 | [0n]bp |
| Mictris crispus caerula | [1710] | 04-SRNP-4244  | 669 | [0n]bp |
| Mictris crispus caerula | [1711] | 03-SRNP-6065  | 663 | [0n]bp |
| Mictris crispus caerula | [1712] | 03-SRNP-9772  | 663 | [0n]bp |
| Mictris crispus caerula | [1713] | 05-SRNP-34282 | 615 | [1n]bp |
| Mictris crispus caerula | [1714] | 05-SRNP-34208 | 588 | [0n]bp |
| Mictris crispus caerula | [1715] | 08-SRNP-1951  | 645 | [0n]bp |
| Mictris crispus caerula | [1716] | 08-SRNP-1961  | 669 | [0n]bp |
| Mictris crispus caerula | [1717] | 08-SRNP-31176 | 669 | [0n]bp |
| Mictris crispus caerula | [1718] | 08-SRNP-2184  | 669 | [0n]bp |
| Mictris crispus caerula | [1719] | 09-SRNP-71399 | 669 | [0n]bp |
| Pachyneuria liscisca    | [1720] | 05-SRNP-58420 | 669 | [0n]bp |
| Pachyneuria liscisca    | [1721] | 03-SRNP-30838 | 669 | [0n]bp |
| Pachyneuria liscisca    | [1722] | 07-SRNP-57201 | 669 | [0n]bp |
| Pachyneuria liscisca    | [1723] | 03-SRNP-27023 | 618 | [0n]bp |
| Pachyneuria liscisca    | [1724] | 03-SRNP-27271 | 585 | [0n]bp |
| Pachyneuria liscisca    | [1725] | 03-SRNP-27670 | 669 | [0n]bp |
| Pachyneuria liscisca    | [1726] | 03-SRNP-30847 | 669 | [0n]bp |
| Pachyneuria liscisca    | [1727] | 03-SRNP-27200 | 669 | [0n]bp |
| Pachyneuria liscisca    | [1728] | 03-SRNP-27033 | 669 | [0n]bp |
| Pachyneuria liscisca    | [1729] | 03-SRNP-27671 | 669 | [0n]bp |
| Pachyneuria liscisca    | [1730] | 03-SRNP-27754 | 669 | [0n]bp |
| Pachyneuria liscisca    | [1731] | 03-SRNP-27025 | 612 | [0n]bp |
| Pachyneuria liscisca    | [1732] | 97-SRNP-5856  | 558 | [0n]bp |
| Pachyneuria liscisca    | [1733] | 02-SRNP-5984  | 567 | [0n]bp |
| Pachyneuria liscisca    | [1734] | 06-SRNP-58286 | 657 | [0n]bp |
| Pachyneuria liscisca    | [1735] | 06-SRNP-58263 | 669 | [0n]bp |
| Pachyneuria liscisca    | [1736] | 06-SRNP-67766 | 669 | [0n]bp |
| Pachyneuria liscisca    | [1737] | 09-SRNP-57271 | 669 | [0n]bp |
| Pachyneuria liscisca    | [1738] | 09-SRNP-57272 | 669 | [0n]bp |
| Pachyneuria liscisca    | [1739] | 09-SRNP-57273 | 669 | [0n]bp |
| Nisoniades castolus     | [1740] | 05-SRNP-6591  | 588 | [2n]bp |
| Nisoniades castolus     | [1741] | 06-SRNP-32805 | 594 | [0n]bp |
| Nisoniades castolus     | [1742] | 05-SRNP-45293 | 687 | [1n]bp |
| Nisoniades castolus     | [1743] | 05-SRNP-31414 | 687 | [0n]bp |
| Nisoniades castolus     | [1744] | 05-SRNP-1751  | 687 | [0n]bp |
| Nisoniades castolus     | [1745] | 07-SRNP-41530 | 669 | [0n]bp |
| Nisoniades castolus     | [1746] | 05-SRNP-31711 | 669 | [0n]bp |
| Nisoniades castolus     | [1747] | 04-SRNP-41670 | 669 | [0n]bp |
| Nisoniades castolus     | [1748] | 04-SRNP-34843 | 669 | [0n]bp |
| Nisoniades castolus     | [1749] | 04-SRNP-56347 | 669 | [0n]bp |
| Nisoniades castolus     | [1750] | 04-SRNP-60852 | 669 | [0n]bp |
| Nisoniades castolus     | [1751] | 05-SRNP-2312  | 687 | [1n]bp |
| Nisoniades castolus     | [1752] | 04-SRNP-55872 | 669 | [1n]bp |
| Nisoniades castolus     | [1753] | 05-SRNP-41450 | 687 | [2n]bp |
| Nisoniades castolus     | [1754] | 05-SRNP-41083 | 636 | [1n]bp |
| Nisoniades castolus     | [1755] | 06-SRNP-32630 | 642 | [1n]bp |
| Nisoniades castolus     | [1756] | 07-SRNP-65198 | 648 | [0n]bp |
| Nisoniades castolus     | [1757] | 07-SRNP-65620 | 669 | [0n]bp |
| Nisoniades castolus     | [1758] | 08-SRNP-2616  | 669 | [0n]bp |
| Nisoniades castolus     | [1759] | 08-SRNP-70988 | 669 | [0n]bp |
| Nisoniades castolus     | [1760] | 08-SRNP-70583 | 669 | [0n]bp |
| Nisoniades castolus     | [1761] | 08-SRNP-65475 | 669 | [0n]bp |
| Nisoniades castolus     | [1762] | 08-SRNP-65509 | 669 | [0n]bp |
| Nisoniades castolus     | [1763] | 08-SRNP-70402 | 669 | [0n]bp |
| Nisoniades castolus     | [1764] | 08-SRNP-2617  | 669 | [0n]bp |
| Nisoniades castolus     | [1765] | 09-SRNP-71609 | 669 | [0n]bp |
| Nisoniades godma        | [1766] | 07-SRNP-21783 | 669 | [0n]bp |
| Nisoniades godma        | [1767] | 08-SRNP-2515  | 669 | [0n]bp |
| Nisoniades godma        | [1768] | 09-SRNP-67771 | 669 | [0n]bp |
| Nisoniades godma        | [1769] | 08-SRNP-35368 | 669 | [0n]bp |
| Nisoniades godma        | [1770] | 08-SRNP-20591 | 669 | [0n]bp |
| Nisoniades godma        | [1771] | 08-SRNP-70907 | 669 | [0n]bp |
| Nisoniades godma        | [1772] | 08-SRNP-35367 | 669 | [0n]bp |
| Nisoniades godma        | [1773] | 07-SRNP-41906 | 669 | [0n]bp |
| Nisoniades godma        | [1774] | 07-SRNP-22159 | 669 | [0n]bp |
| Nisoniades godma        | [1775] | 07-SRNP-2603  | 669 | [0n]bp |
| Nisoniades godma        | [1776] | 07-SRNP-21785 | 669 | [0n]bp |
| Nisoniades godma        | [1777] | 07-SRNP-2675  | 669 | [0n]bp |
| Nisoniades godma        | [1778] | 07-SRNP-3043  | 669 | [0n]bp |
| Nisoniades godma        | [1779] | 06-SRNP-60085 | 669 | [0n]bp |
| Nisoniades godma        | [1780] | 06-SRNP-60084 | 669 | [0n]bp |
| Nisoniades godma        | [1781] | 98-SRNP-4340  | 669 | [0n]bp |
| Nisoniades godma        | [1782] | 07-SRNP-35261 | 669 | [0n]bp |
| Nisoniades godma        | [1783] | 98-SRNP-4343  | 669 | [0n]bp |
| Nisoniades godma        | [1784] | 98-SRNP-4337  | 669 | [0n]bp |
| Nisoniades godma        | [1785] | 05-SRNP-30669 | 669 | [0n]bp |
| Nisoniades godma        | [1786] | 98-SRNP-4617  | 669 | [0n]bp |
| Nisoniades godma        | [1787] | 07-SRNP-65813 | 669 | [0n]bp |
| Nisoniades godma        | [1788] | 07-SRNP-65579 | 669 | [0n]bp |
| Nisoniades godma        | [1789] | 07-SRNP-55229 | 669 | [0n]bp |
| Nisoniades godma        | [1790] | 07-SRNP-55227 | 669 | [0n]bp |
| Nisoniades godma        | [1791] | 02-SRNP-5568  | 669 | [0n]bp |
| Nisoniades godma        | [1792] | 02-SRNP-5569  | 669 | [0n]bp |
| Nisoniades godma        | [1793] | 02-SRNP-6253  | 669 | [0n]bp |
| Nisoniades godma        | [1794] | 02-SRNP-7146  | 669 | [0n]bp |
| Nisoniades godma        | [1795] | 02-SRNP-5582  | 669 | [0n]bp |
| Nisoniades godma        | [1796] | 02-SRNP-5571  | 669 | [0n]bp |
| Nisoniades godma        | [1797] | 04-SRNP-47998 | 669 | [0n]bp |
| Nisoniades godma        | [1798] | 04-SRNP-47987 | 669 | [0n]bp |
| Nisoniades godma        | [1799] | 04-SRNP-23805 | 669 | [0n]bp |

Nisoniades godma | [1797] | 04-SRNP-47987 | 669 [0n]bp  
 Nisoniades godma | [1798] | 04-SRNP-47987 | 669 [0n]bp  
 Nisoniades godma | [1799] | 04-SRNP-23805 | 669 [0n]bp  
 Nisoniades godma | [1800] | 07-SRNP-55730 | 663 [0n]bp  
 Nisoniades godma | [1801] | 07-SRNP-21248 | 660 [0n]bp  
 Nisoniades godma | [1802] | 05-SRNP-34138 | 630 [0n]bp  
 Nisoniades godma | [1803] | 02-SRNP-5578 | 669 [1n]bp  
 Nisoniades godma | [1804] | 03-SRNP-1412 | 657 [0n]bp  
 Nisoniades godma | [1805] | 02-SRNP-18975 | 603 [1n]bp  
 Nisoniades godma | [1806] | 06-SRNP-31175 | 627 [0n]bp  
 Nisoniades godma | [1807] | 05-SRNP-59705 | 633 [0n]bp  
 Nisoniades godma | [1808] | 08-SRNP-72371 | 408 [0n]bp  
 Nisoniades godma | [1809] | 09-SRNP-67700 | 669 [0n]bp  
 Nisoniades godma | [1810] | 09-SRNP-75599 | 669 [0n]bp  
 Nisoniades godma | [1811] | 09-SRNP-75202 | 669 [0n]bp  
 Nisoniades Burns02 | [1812] | 05-SRNP-24032 | 669 [0n]bp  
 Nisoniades Burns02 | [1813] | 01-SRNP-14613 | 669 [0n]bp  
 Nisoniades tortaDHJ01 | [1814] | 08-SRNP-2752 | 669 [0n]bp  
 Nisoniades tortaDHJ02 | [1815] | 08-SRNP-5186 | 669 [0n]bp  
 Nisoniades tortaDHJ02 | [1816] | 06-SRNP-659 | 669 [0n]bp  
 Nisoniades tortaDHJ02 | [1817] | 09-SRNP-3730 | 669 [0n]bp  
 Nisoniades rubescensDHJ01 | [1818] | 01-SRNP-16913 | 669 [0n]bp  
 Nisoniades rubescensDHJ02 | [1819] | 99-SRNP-2497 | 609 [0n]bp  
 Nisoniades rubescensDHJ02 | [1820] | 99-SRNP-2290 | 669 [0n]bp  
 Nisoniades rubescensDHJ02 | [1821] | 01-SRNP-9028 | 669 [0n]bp  
 Nisoniades rubescensDHJ02 | [1822] | 06-SRNP-4756 | 669 [0n]bp  
 Nisoniades rubescensDHJ02 | [1823] | 05-SRNP-41322 | 669 [0n]bp  
 Nisoniades rubescensDHJ02 | [1824] | 04-SRNP-22441 | 669 [0n]bp  
 Nisoniades rubescensDHJ02 | [1825] | 04-SRNP-48521 | 669 [0n]bp  
 Nisoniades rubescensDHJ02 | [1826] | 04-SRNP-22824 | 669 [0n]bp  
 Nisoniades rubescensDHJ02 | [1827] | 05-SRNP-61949 | 630 [0n]bp  
 Nisoniades rubescensDHJ02 | [1828] | 08-SRNP-65094 | 645 [0n]bp  
 Nisoniades rubescensDHJ02 | [1829] | 09-SRNP-75982 | 669 [0n]bp  
 Polyctor enops | [1830] | 06-SRNP-23424 | 525 [6n]bp  
 Polyctor enops | [1831] | 07-SRNP-20052 | 669 [0n]bp  
 Polyctor enops | [1832] | 06-SRNP-23355 | 669 [0n]bp  
 Polyctor enops | [1833] | 06-SRNP-23356 | 669 [0n]bp  
 Polyctor enops | [1834] | 06-SRNP-23354 | 669 [0n]bp  
 Polyctor enops | [1835] | 05-SRNP-24534 | 669 [0n]bp  
 Polyctor enops | [1836] | 05-SRNP-24533 | 669 [0n]bp  
 Polyctor enops | [1837] | 05-SRNP-24532 | 633 [0n]bp  
 Polyctor enops | [1838] | 07-SRNP-23555 | 669 [0n]bp  
 Polyctor enops | [1839] | 07-SRNP-23554 | 669 [0n]bp  
 Polyctor enops | [1840] | 07-SRNP-23640 | 669 [0n]bp  
 Polyctor enops | [1841] | 07-SRNP-23639 | 669 [0n]bp  
 Polyctor enops | [1842] | 07-SRNP-22844 | 669 [0n]bp  
 Polyctor enops | [1843] | 07-SRNP-23549 | 669 [0n]bp  
 Polyctor enops | [1844] | 07-SRNP-22845 | 669 [0n]bp  
 Polyctor enops | [1845] | 07-SRNP-23636 | 669 [0n]bp  
 Polyctor enops | [1846] | 07-SRNP-23542 | 669 [0n]bp  
 Polyctor enops | [1847] | 07-SRNP-23544 | 669 [0n]bp  
 Polyctor enops | [1848] | 07-SRNP-23548 | 669 [0n]bp  
 Polyctor enops | [1849] | 07-SRNP-23551 | 669 [0n]bp  
 Polyctor enops | [1850] | 07-SRNP-23553 | 669 [0n]bp  
 Polyctor enops | [1851] | 07-SRNP-23552 | 666 [0n]bp  
 Polyctor enops | [1852] | 07-SRNP-23550 | 657 [0n]bp  
 Polyctor enops | [1853] | 02-SRNP-30383 | 657 [0n]bp  
 Polyctor enops | [1854] | 02-SRNP-30386 | 657 [0n]bp  
 Polyctor enops | [1855] | 07-SRNP-23545 | 642 [0n]bp  
 Polyctor enops | [1856] | 09-SRNP-23331 | 669 [0n]bp  
 Polyctor polyctor | [1857] | 09-SRNP-20156 | 333 [0n]bp  
 Polyctor polyctor | [1858] | 03-SRNP-21493 | 519 [0n]bp  
 Polyctor polyctor | [1859] | 03-SRNP-29770 | 522 [0n]bp  
 Polyctor cleta | [1860] | 04-SRNP-16175 | 669 [0n]bp  
 Polyctor cleta | [1861] | 04-SRNP-15360 | 669 [0n]bp  
 Polyctor cleta | [1862] | 04-SRNP-15455 | 669 [0n]bp  
 Polyctor cleta | [1863] | 04-SRNP-16111 | 669 [0n]bp  
 Polyctor cleta | [1864] | 95-SRNP-9502 | 642 [0n]bp  
 Polyctor cleta | [1865] | 03-SRNP-37549 | 642 [0n]bp  
 Polyctor cleta | [1866] | 03-SRNP-30883 | 642 [0n]bp  
 Polyctor cleta | [1867] | 98-SRNP-4183 | 525 [0n]bp  
 Polyctor cleta | [1868] | 00-SRNP-20253 | 627 [0n]bp  
 Polyctor cleta | [1869] | 00-SRNP-2150 | 627 [0n]bp  
 Polyctor cleta | [1870] | 03-SRNP-30880 | 627 [0n]bp  
 Polyctor cleta | [1871] | 03-SRNP-30882 | 627 [0n]bp  
 Polyctor cleta | [1872] | 02-SRNP-32285 | 627 [0n]bp  
 Polyctor cleta | [1873] | 02-SRNP-31414 | 627 [0n]bp  
 Polyctor cleta | [1874] | 03-SRNP-37550 | 627 [0n]bp  
 Polyctor cleta | [1875] | 93-SRNP-5853 | 627 [2n]bp  
 Polyctor cleta | [1876] | 95-SRNP-9500 | 627 [0n]bp  
 Polyctor cleta | [1877] | 05-SRNP-61212 | 627 [0n]bp  
 Polyctor polyctor | [1878] | 02-SRNP-27779 | 630 [0n]bp  
 Polyctor cleta | [1879] | 92-SRNP-4986 | 606 [0n]bp  
 Polyctor polyctor | [1880] | 05-SRNP-41712 | 669 [0n]bp  
 Polyctor polyctor | [1881] | 07-SRNP-21961 | 669 [0n]bp  
 Polyctor polyctor | [1882] | 03-SRNP-29891 | 615 [0n]bp  
 Polyctor polyctor | [1883] | 00-SRNP-14180 | 618 [0n]bp  
 Polyctor polyctor | [1884] | 03-SRNP-20449 | 627 [0n]bp  
 Polyctor polyctor | [1885] | 02-SRNP-7128 | 627 [0n]bp  
 Polyctor polyctor | [1886] | 80-SRNP-364 | 585 [1n]bp  
 Polyctor polyctor | [1887] | 05-SRNP-42248 | 669 [1n]bp  
 Polyctor polyctor | [1888] | 03-SRNP-21456 | 591 [2n]bp  
 Polyctor polyctor | [1889] | 05-SRNP-6247 | 666 [1n]bp  
 Polyctor polyctor | [1890] | 05-SRNP-1141 | 627 [2n]bp  
 Polyctor polyctor | [1891] | 05-SRNP-33391 | 633 [0n]bp  
 Polyctor polyctor | [1892] | 03-SRNP-9639 | 630 [0n]bp  
 Polyctor polyctor | [1893] | 03-SRNP-20028 | 636 [0n]bp  
 Polyctor polyctor | [1894] | 05-SRNP-41517 | 687 [0n]bp  
 Polyctor polyctor | [1895] | 08-SRNP-4909 | 669 [0n]bp  
 Polyctor polyctor | [1896] | 08-SRNP-4993 | 669 [0n]bp  
 Polyctor polyctor | [1897] | 08-SRNP-4991 | 669 [0n]bp  
 Polyctor polyctor | [1898] | 08-SRNP-5183 | 669 [0n]bp  
 Polyctor polyctor | [1899] | 08-SRNP-5182 | 669 [0n]bp

|           |           |        |               |     |      |    |
|-----------|-----------|--------|---------------|-----|------|----|
| Polyctor  | polyctor  | [1897] | 08-SRNP-5183  | 669 | [0n] | bp |
| Polyctor  | polyctor  | [1898] | 08-SRNP-5183  | 669 | [0n] | bp |
| Polyctor  | polyctor  | [1899] | 08-SRNP-5182  | 669 | [0n] | bp |
| Polyctor  | polyctor  | [1900] | 08-SRNP-5181  | 669 | [0n] | bp |
| Polyctor  | polyctor  | [1901] | 08-SRNP-5273  | 669 | [0n] | bp |
| Polyctor  | polyctor  | [1902] | 08-SRNP-4906  | 669 | [0n] | bp |
| Polyctor  | polyctor  | [1903] | 08-SRNP-4903  | 669 | [0n] | bp |
| Polyctor  | polyctor  | [1904] | 08-SRNP-4905  | 669 | [0n] | bp |
| Polyctor  | polyctor  | [1905] | 08-SRNP-4902  | 669 | [0n] | bp |
| Polyctor  | polyctor  | [1906] | 08-SRNP-4904  | 669 | [0n] | bp |
| Polyctor  | polyctor  | [1907] | 08-SRNP-4996  | 669 | [0n] | bp |
| Polyctor  | polyctor  | [1908] | 08-SRNP-20490 | 669 | [0n] | bp |
| Polyctor  | polyctor  | [1909] | 07-SRNP-2990  | 669 | [0n] | bp |
| Polyctor  | polyctor  | [1910] | 07-SRNP-21952 | 669 | [0n] | bp |
| Polyctor  | polyctor  | [1911] | 07-SRNP-21283 | 669 | [0n] | bp |
| Polyctor  | polyctor  | [1912] | 06-SRNP-31806 | 669 | [0n] | bp |
| Polyctor  | polyctor  | [1913] | 06-SRNP-31800 | 669 | [0n] | bp |
| Polyctor  | polyctor  | [1914] | 05-SRNP-41516 | 669 | [0n] | bp |
| Polyctor  | polyctor  | [1915] | 05-SRNP-42247 | 669 | [0n] | bp |
| Polyctor  | polyctor  | [1916] | 04-SRNP-21386 | 669 | [0n] | bp |
| Polyctor  | polyctor  | [1917] | 04-SRNP-61064 | 669 | [0n] | bp |
| Polyctor  | polyctor  | [1918] | 04-SRNP-21385 | 669 | [0n] | bp |
| Polyctor  | polyctor  | [1919] | 04-SRNP-23706 | 669 | [0n] | bp |
| Polyctor  | polyctor  | [1920] | 04-SRNP-61026 | 669 | [0n] | bp |
| Polyctor  | polyctor  | [1921] | 04-SRNP-60859 | 669 | [0n] | bp |
| Polyctor  | polyctor  | [1922] | 04-SRNP-60861 | 669 | [0n] | bp |
| Polyctor  | polyctor  | [1923] | 04-SRNP-14595 | 669 | [0n] | bp |
| Polyctor  | polyctor  | [1924] | 04-SRNP-42603 | 669 | [0n] | bp |
| Polyctor  | polyctor  | [1925] | 04-SRNP-61027 | 669 | [0n] | bp |
| Polyctor  | polyctor  | [1926] | 04-SRNP-14594 | 669 | [0n] | bp |
| Polyctor  | polyctor  | [1927] | 03-SRNP-9643  | 591 | [0n] | bp |
| Polyctor  | polyctor  | [1928] | 03-SRNP-9706  | 591 | [0n] | bp |
| Polyctor  | polyctor  | [1929] | 02-SRNP-7127  | 642 | [0n] | bp |
| Polyctor  | polyctor  | [1930] | 03-SRNP-9701  | 642 | [0n] | bp |
| Polyctor  | polyctor  | [1931] | 03-SRNP-9641  | 642 | [0n] | bp |
| Polyctor  | polyctor  | [1932] | 95-SRNP-9527  | 642 | [0n] | bp |
| Polyctor  | polyctor  | [1933] | 02-SRNP-31973 | 642 | [0n] | bp |
| Polyctor  | polyctor  | [1934] | 07-SRNP-24016 | 654 | [0n] | bp |
| Polyctor  | polyctor  | [1935] | 07-SRNP-20959 | 657 | [0n] | bp |
| Polyctor  | polyctor  | [1936] | 08-SRNP-355   | 648 | [0n] | bp |
| Polyctor  | polyctor  | [1937] | 08-SRNP-356   | 651 | [0n] | bp |
| Polyctor  | polyctor  | [1938] | 08-SRNP-358   | 660 | [0n] | bp |
| Polyctor  | polyctor  | [1939] | 02-SRNP-7132  | 645 | [0n] | bp |
| Polyctor  | polyctor  | [1940] | 04-SRNP-61128 | 648 | [0n] | bp |
| Polyctor  | polyctor  | [1941] | 04-SRNP-56096 | 645 | [0n] | bp |
| Polyctor  | polyctor  | [1942] | 05-SRNP-34721 | 633 | [0n] | bp |
| Polyctor  | polyctor  | [1943] | 08-SRNP-350   | 645 | [0n] | bp |
| Polyctor  | polyctor  | [1944] | 08-SRNP-499   | 645 | [0n] | bp |
| Polyctor  | polyctor  | [1945] | 08-SRNP-501   | 645 | [0n] | bp |
| Polyctor  | polyctor  | [1946] | 08-SRNP-500   | 645 | [0n] | bp |
| Polyctor  | polyctor  | [1947] | 08-SRNP-359   | 645 | [0n] | bp |
| Polyctor  | polyctor  | [1948] | 08-SRNP-22736 | 645 | [0n] | bp |
| Polyctor  | polyctor  | [1949] | 09-SRNP-20479 | 669 | [0n] | bp |
| Polyctor  | polyctor  | [1950] | 09-SRNP-20478 | 669 | [0n] | bp |
| Polyctor  | polyctor  | [1951] | 09-SRNP-20485 | 669 | [0n] | bp |
| Polyctor  | polyctor  | [1952] | 09-SRNP-56143 | 669 | [0n] | bp |
| Polyctor  | polyctor  | [1953] | 09-SRNP-20724 | 669 | [0n] | bp |
| Polyctor  | polyctor  | [1954] | 08-SRNP-22527 | 669 | [0n] | bp |
| Polyctor  | polyctor  | [1955] | 07-SRNP-20902 | 654 | [0n] | bp |
| Polyctor  | polyctor  | [1956] | 08-SRNP-360   | 651 | [0n] | bp |
| Polyctor  | polyctor  | [1957] | 08-SRNP-353   | 648 | [1n] | bp |
| Polyctor  | polyctor  | [1958] | 09-SRNP-20298 | 420 | [0n] | bp |
| Polyctor  | polyctor  | [1959] | 09-SRNP-23649 | 636 | [0n] | bp |
| Polyctor  | cleta     | [1960] | 09-SRNP-12336 | 669 | [0n] | bp |
| Noctuana  | lactifera | [1961] | 02-SRNP-24244 | 642 | [0n] | bp |
| Noctuana  | lactifera | [1962] | 02-SRNP-23370 | 630 | [0n] | bp |
| Noctuana  | stator    | [1963] | 04-SRNP-2409  | 627 | [0n] | bp |
| Noctuana  | stator    | [1964] | 04-SRNP-24455 | 669 | [0n] | bp |
| Noctuana  | stator    | [1965] | 04-SRNP-24257 | 669 | [0n] | bp |
| Noctuana  | stator    | [1966] | 06-SRNP-60240 | 669 | [0n] | bp |
| Noctuana  | stator    | [1967] | 01-SRNP-2693  | 669 | [1n] | bp |
| Noctuana  | stator    | [1968] | 07-SRNP-2653  | 669 | [0n] | bp |
| Noctuana  | stator    | [1969] | 07-SRNP-2654  | 669 | [0n] | bp |
| Noctuana  | stator    | [1970] | 07-SRNP-31904 | 669 | [0n] | bp |
| Noctuana  | stator    | [1971] | 07-SRNP-736   | 669 | [0n] | bp |
| Noctuana  | stator    | [1972] | 07-SRNP-735   | 669 | [0n] | bp |
| Noctuana  | stator    | [1973] | 06-SRNP-7267  | 669 | [0n] | bp |
| Noctuana  | stator    | [1974] | 06-SRNP-6258  | 669 | [0n] | bp |
| Noctuana  | stator    | [1975] | 06-SRNP-43409 | 669 | [0n] | bp |
| Noctuana  | stator    | [1976] | 05-SRNP-4577  | 669 | [0n] | bp |
| Noctuana  | stator    | [1977] | 05-SRNP-3987  | 669 | [0n] | bp |
| Noctuana  | stator    | [1978] | 05-SRNP-32434 | 669 | [0n] | bp |
| Noctuana  | stator    | [1979] | 01-SRNP-2492  | 669 | [0n] | bp |
| Noctuana  | stator    | [1980] | 01-SRNP-2692  | 669 | [0n] | bp |
| Noctuana  | stator    | [1981] | 01-SRNP-2691  | 669 | [0n] | bp |
| Noctuana  | stator    | [1982] | 02-SRNP-6661  | 669 | [0n] | bp |
| Noctuana  | stator    | [1983] | 02-SRNP-7532  | 669 | [0n] | bp |
| Noctuana  | stator    | [1984] | 02-SRNP-17990 | 669 | [0n] | bp |
| Noctuana  | stator    | [1985] | 04-SRNP-3780  | 669 | [0n] | bp |
| Noctuana  | stator    | [1986] | 04-SRNP-2095  | 669 | [0n] | bp |
| Noctuana  | stator    | [1987] | 05-SRNP-5563  | 669 | [1n] | bp |
| Noctuana  | stator    | [1988] | 01-SRNP-2493  | 669 | [0n] | bp |
| Noctuana  | stator    | [1989] | 05-SRNP-453   | 669 | [0n] | bp |
| Noctuana  | stator    | [1990] | 02-SRNP-17989 | 645 | [0n] | bp |
| Noctuana  | stator    | [1991] | 01-SRNP-2491  | 624 | [0n] | bp |
| Noctuana  | stator    | [1992] | 04-SRNP-41356 | 624 | [0n] | bp |
| Noctuana  | stator    | [1993] | 07-SRNP-24112 | 591 | [3n] | bp |
| Noctuana  | stator    | [1994] | 08-SRNP-4026  | 669 | [0n] | bp |
| Noctuana  | stator    | [1995] | 08-SRNP-4027  | 669 | [0n] | bp |
| Noctuana  | stator    | [1996] | 08-SRNP-4533  | 669 | [0n] | bp |
| Staphylus | evemerus  | [1997] | 00-SRNP-10647 | 558 | [0n] | bp |
| Staphylus | evemerus  | [1998] | 99-SRNP-740   | 633 | [0n] | bp |
| Staphylus | evemerus  | [1999] | 00-SRNP-10651 | 669 | [0n] | bp |

|            |              |        |               |     |        |
|------------|--------------|--------|---------------|-----|--------|
| Staphylus  | evemerus     | [1997] | 00-SRNP-1004  | 669 | [0n]bp |
| Staphylus  | evemerus     | [1998] | 99-SRNP-740   | 633 | [0n]bp |
| Staphylus  | evemerus     | [1999] | 00-SRNP-10651 | 669 | [0n]bp |
| Staphylus  | evemerus     | [2000] | 00-SRNP-10765 | 669 | [0n]bp |
| Staphylus  | evemerus     | [2001] | 00-SRNP-10414 | 669 | [0n]bp |
| Staphylus  | evemerus     | [2002] | 00-SRNP-10763 | 669 | [0n]bp |
| Staphylus  | evemerus     | [2003] | 00-SRNP-10413 | 669 | [0n]bp |
| Staphylus  | evemerus     | [2004] | 03-SRNP-23252 | 669 | [0n]bp |
| Staphylus  | evemerus     | [2005] | 05-SRNP-35826 | 669 | [0n]bp |
| Staphylus  | evemerus     | [2006] | 04-SRNP-35967 | 669 | [0n]bp |
| Staphylus  | evemerus     | [2007] | 00-SRNP-10644 | 594 | [0n]bp |
| Staphylus  | evemerus     | [2008] | 00-SRNP-10648 | 594 | [0n]bp |
| Staphylus  | evemerus     | [2009] | 00-SRNP-10645 | 342 | [0n]bp |
| Staphylus  | evemerus     | [2010] | 00-SRNP-10654 | 324 | [0n]bp |
| Staphylus  | evemerus     | [2011] | 02-SRNP-23336 | 669 | [0n]bp |
| Staphylus  | evemerus     | [2012] | 02-SRNP-23337 | 669 | [0n]bp |
| Staphylus  | evemerus     | [2013] | 06-SRNP-35702 | 669 | [0n]bp |
| Staphylus  | evemerus     | [2014] | 07-SRNP-36178 | 669 | [0n]bp |
| Bolla      | zorillaDHJ11 | [2015] | 05-SRNP-5923  | 669 | [0n]bp |
| Bolla      | zorillaDHJ11 | [2016] | 03-SRNP-6884  | 669 | [0n]bp |
| Bolla      | zorillaDHJ11 | [2017] | 06-SRNP-7810  | 669 | [0n]bp |
| Bolla      | zorillaDHJ11 | [2018] | 06-SRNP-7811  | 669 | [0n]bp |
| Bolla      | zorillaDHJ09 | [2019] | 05-SRNP-7192  | 669 | [1n]bp |
| Bolla      | zorillaDHJ09 | [2020] | 05-SRNP-5451  | 669 | [0n]bp |
| Bolla      | zorillaDHJ09 | [2021] | 05-SRNP-7193  | 669 | [0n]bp |
| Bolla      | zorillaDHJ09 | [2022] | 05-SRNP-7191  | 669 | [0n]bp |
| Bolla      | zorillaDHJ09 | [2023] | 06-SRNP-1939  | 669 | [0n]bp |
| Bolla      | zorillaDHJ09 | [2024] | 06-SRNP-9445  | 669 | [0n]bp |
| Bolla      | zorillaDHJ13 | [2025] | 98-SRNP-3082  | 669 | [0n]bp |
| Bolla      | zorillaDHJ13 | [2026] | 04-SRNP-3961  | 669 | [0n]bp |
| Bolla      | zorillaDHJ13 | [2027] | 98-SRNP-3081  | 651 | [2n]bp |
| Bolla      | zorillaDHJ13 | [2028] | 06-SRNP-7350  | 669 | [0n]bp |
| Bolla      | zorillaDHJ02 | [2029] | 04-SRNP-3517  | 669 | [0n]bp |
| Bolla      | zorillaDHJ02 | [2030] | 05-SRNP-546   | 651 | [0n]bp |
| Bolla      | zorillaDHJ02 | [2031] | 05-SRNP-7189  | 669 | [0n]bp |
| Bolla      | zorillaDHJ02 | [2032] | 05-SRNP-7190  | 669 | [0n]bp |
| Bolla      | zorillaDHJ02 | [2033] | 02-SRNP-3822  | 669 | [0n]bp |
| Bolla      | zorillaDHJ02 | [2034] | 04-SRNP-3614  | 669 | [0n]bp |
| Bolla      | zorillaDHJ02 | [2035] | 06-SRNP-9042  | 669 | [0n]bp |
| Bolla      | zorillaDHJ02 | [2036] | 07-SRNP-1168  | 669 | [0n]bp |
| Bolla      | zorillaDHJ02 | [2037] | 07-SRNP-611   | 669 | [0n]bp |
| Bolla      | zorillaDHJ02 | [2038] | 05-SRNP-5922  | 669 | [0n]bp |
| Bolla      | zorillaDHJ02 | [2039] | 05-SRNP-7218  | 669 | [0n]bp |
| Bolla      | zorillaDHJ02 | [2040] | 06-SRNP-2051  | 669 | [0n]bp |
| Bolla      | zorillaDHJ02 | [2041] | 06-SRNP-4375  | 669 | [0n]bp |
| Bolla      | zorillaDHJ02 | [2042] | 06-SRNP-3931  | 669 | [0n]bp |
| Bolla      | zorillaDHJ02 | [2043] | 06-SRNP-6672  | 669 | [0n]bp |
| Bolla      | zorillaDHJ02 | [2044] | 06-SRNP-6230  | 669 | [0n]bp |
| Bolla      | zorillaDHJ02 | [2045] | 06-SRNP-6674  | 669 | [0n]bp |
| Bolla      | zorillaDHJ02 | [2046] | 06-SRNP-7405  | 669 | [0n]bp |
| Bolla      | zorillaDHJ02 | [2047] | 07-SRNP-2467  | 669 | [0n]bp |
| Arteurotia | tractipennis | [2048] | 95-SRNP-11460 | 528 | [0n]bp |
| Arteurotia | tractipennis | [2049] | 06-SRNP-1612  | 669 | [0n]bp |
| Arteurotia | tractipennis | [2050] | 95-SRNP-11459 | 639 | [1n]bp |
| Arteurotia | tractipennis | [2051] | 04-SRNP-32635 | 630 | [0n]bp |
| Arteurotia | tractipennis | [2052] | 04-SRNP-32574 | 630 | [0n]bp |
| Arteurotia | tractipennis | [2053] | 96-SRNP-1080  | 606 | [3n]bp |
| Arteurotia | tractipennis | [2054] | 00-SRNP-2356  | 615 | [3n]bp |
| Arteurotia | tractipennis | [2055] | 00-SRNP-2402  | 618 | [0n]bp |
| Arteurotia | tractipennis | [2056] | 00-SRNP-2258  | 681 | [0n]bp |
| Arteurotia | tractipennis | [2057] | 96-SRNP-1001  | 612 | [5n]bp |
| Arteurotia | tractipennis | [2058] | 05-SRNP-30659 | 594 | [1n]bp |
| Arteurotia | tractipennis | [2059] | 06-SRNP-57518 | 648 | [0n]bp |
| Bolla      | evippel      | [2060] | 09-SRNP-57008 | 669 | [0n]bp |
| Staphylus  | Janzen03     | [2061] | 04-SRNP-47281 | 669 | [0n]bp |
| Staphylus  | Janzen08     | [2062] | 05-SRNP-7212  | 669 | [7n]bp |
| Staphylus  | Janzen08     | [2063] | 06-SRNP-1211  | 669 | [0n]bp |
| Staphylus  | Janzen08     | [2064] | 06-SRNP-9509  | 669 | [0n]bp |
| Staphylus  | ascalaphus   | [2065] | 99-SRNP-3147  | 669 | [0n]bp |
| Staphylus  | ascalaphus   | [2066] | 00-SRNP-20227 | 669 | [0n]bp |
| Staphylus  | ascalaphus   | [2067] | 08-SRNP-55731 | 669 | [2n]bp |
| Staphylus  | ascalaphus   | [2068] | 05-SRNP-55703 | 669 | [0n]bp |
| Staphylus  | ascalaphus   | [2069] | 00-SRNP-6524  | 687 | [1n]bp |
| Staphylus  | ascalaphus   | [2070] | 05-SRNP-22540 | 669 | [0n]bp |
| Staphylus  | ascalaphus   | [2071] | 05-SRNP-55693 | 669 | [0n]bp |
| Staphylus  | ascalaphus   | [2072] | 06-SRNP-7407  | 669 | [0n]bp |
| Staphylus  | ascalaphus   | [2073] | 07-SRNP-55673 | 669 | [0n]bp |
| Staphylus  | ascalaphus   | [2074] | 06-SRNP-19545 | 669 | [0n]bp |
| Staphylus  | ascalaphus   | [2075] | 08-SRNP-55942 | 669 | [0n]bp |
| Staphylus  | ascalaphus   | [2076] | 08-SRNP-55778 | 669 | [0n]bp |
| Staphylus  | ascalaphus   | [2077] | 08-SRNP-55888 | 669 | [0n]bp |
| Staphylus  | ascalaphus   | [2078] | 05-SRNP-55700 | 669 | [1n]bp |
| Staphylus  | ascalaphus   | [2079] | 07-SRNP-55652 | 663 | [0n]bp |
| Staphylus  | ascalaphus   | [2080] | 05-SRNP-55699 | 669 | [0n]bp |
| Staphylus  | ascalaphus   | [2081] | 05-SRNP-55697 | 669 | [0n]bp |
| Staphylus  | ascalaphus   | [2082] | 06-SRNP-9159  | 669 | [0n]bp |
| Staphylus  | ascalaphus   | [2083] | 06-SRNP-8678  | 669 | [0n]bp |
| Staphylus  | ascalaphus   | [2084] | 07-SRNP-55651 | 669 | [0n]bp |
| Staphylus  | ascalaphus   | [2085] | 07-SRNP-55830 | 669 | [0n]bp |
| Staphylus  | ascalaphus   | [2086] | 08-SRNP-55975 | 669 | [0n]bp |
| Staphylus  | Janzen10     | [2087] | 05-SRNP-55789 | 669 | [0n]bp |
| Staphylus  | vulgata      | [2088] | 04-SRNP-45556 | 669 | [0n]bp |
| Staphylus  | vulgata      | [2089] | 03-SRNP-28632 | 669 | [0n]bp |
| Staphylus  | vulgata      | [2090] | 04-SRNP-20675 | 669 | [0n]bp |
| Staphylus  | vulgata      | [2091] | 04-SRNP-20668 | 669 | [0n]bp |
| Staphylus  | vulgata      | [2092] | 04-SRNP-22975 | 669 | [0n]bp |
| Staphylus  | vulgata      | [2093] | 05-SRNP-45426 | 669 | [0n]bp |
| Staphylus  | vulgata      | [2094] | 02-SRNP-15565 | 669 | [0n]bp |
| Staphylus  | vulgata      | [2095] | 02-SRNP-5534  | 669 | [0n]bp |
| Staphylus  | vulgata      | [2096] | 04-SRNP-20840 | 669 | [0n]bp |
| Staphylus  | vulgata      | [2097] | 02-SRNP-5685  | 669 | [0n]bp |
| Staphylus  | vulgata      | [2098] | 02-SRNP-5693  | 669 | [0n]bp |
| Staphylus  | vulgata      | [2099] | 02-SRNP-5530  | 669 | [0n]bp |

|                       |        |               |     |      |    |
|-----------------------|--------|---------------|-----|------|----|
| Staphylococcus aureus | [2097] | 02-SRNP-5693  | 669 | [0n] | bp |
| Staphylococcus aureus | [2098] | 02-SRNP-5693  | 669 | [0n] | bp |
| Staphylococcus aureus | [2099] | 02-SRNP-5530  | 669 | [0n] | bp |
| Staphylococcus aureus | [2100] | 02-SRNP-5689  | 669 | [0n] | bp |
| Staphylococcus aureus | [2101] | 02-SRNP-5535  | 669 | [0n] | bp |
| Staphylococcus aureus | [2102] | 06-SRNP-22894 | 669 | [0n] | bp |
| Staphylococcus aureus | [2103] | 07-SRNP-55674 | 669 | [0n] | bp |
| Staphylococcus aureus | [2104] | 04-SRNP-22011 | 669 | [0n] | bp |
| Staphylococcus aureus | [2105] | 07-SRNP-55812 | 669 | [1n] | bp |
| Staphylococcus aureus | [2106] | 06-SRNP-58302 | 669 | [0n] | bp |
| Staphylococcus aureus | [2107] | 06-SRNP-22880 | 669 | [0n] | bp |
| Staphylococcus aureus | [2108] | 04-SRNP-45022 | 669 | [0n] | bp |
| Staphylococcus aureus | [2109] | 03-SRNP-29100 | 669 | [0n] | bp |
| Staphylococcus aureus | [2110] | 02-SRNP-5684  | 669 | [0n] | bp |
| Staphylococcus aureus | [2111] | 02-SRNP-5692  | 669 | [0n] | bp |
| Staphylococcus aureus | [2112] | 04-SRNP-45563 | 669 | [0n] | bp |
| Staphylococcus aureus | [2113] | 04-SRNP-45512 | 669 | [0n] | bp |
| Staphylococcus aureus | [2114] | 04-SRNP-45548 | 669 | [0n] | bp |
| Staphylococcus aureus | [2115] | 04-SRNP-45554 | 669 | [0n] | bp |
| Staphylococcus aureus | [2116] | 05-SRNP-55314 | 669 | [0n] | bp |
| Staphylococcus aureus | [2117] | 05-SRNP-55698 | 669 | [0n] | bp |
| Staphylococcus aureus | [2118] | 05-SRNP-55849 | 669 | [0n] | bp |
| Staphylococcus aureus | [2119] | 05-SRNP-57366 | 669 | [0n] | bp |
| Staphylococcus aureus | [2120] | 05-SRNP-55705 | 669 | [0n] | bp |
| Staphylococcus aureus | [2121] | 05-SRNP-59885 | 669 | [0n] | bp |
| Staphylococcus aureus | [2122] | 05-SRNP-46990 | 669 | [0n] | bp |
| Staphylococcus aureus | [2123] | 05-SRNP-59424 | 669 | [0n] | bp |
| Staphylococcus aureus | [2124] | 04-SRNP-45189 | 669 | [0n] | bp |
| Staphylococcus aureus | [2125] | 04-SRNP-23419 | 669 | [0n] | bp |
| Staphylococcus aureus | [2126] | 04-SRNP-48166 | 669 | [0n] | bp |
| Staphylococcus aureus | [2127] | 04-SRNP-22233 | 627 | [0n] | bp |
| Staphylococcus aureus | [2128] | 04-SRNP-45224 | 627 | [0n] | bp |
| Staphylococcus aureus | [2129] | 04-SRNP-45552 | 618 | [0n] | bp |
| Staphylococcus aureus | [2130] | 98-SRNP-5965  | 591 | [0n] | bp |
| Staphylococcus aureus | [2131] | 02-SRNP-5690  | 324 | [0n] | bp |
| Staphylococcus aureus | [2132] | 98-SRNP-4751  | 594 | [1n] | bp |
| Staphylococcus aureus | [2133] | 06-SRNP-46873 | 648 | [1n] | bp |
| Staphylococcus aureus | [2134] | 06-SRNP-58287 | 624 | [0n] | bp |
| Staphylococcus aureus | [2135] | 07-SRNP-55628 | 669 | [0n] | bp |
| Staphylococcus aureus | [2136] | 07-SRNP-55813 | 669 | [0n] | bp |
| Staphylococcus aureus | [2137] | 07-SRNP-55675 | 669 | [0n] | bp |
| Staphylococcus aureus | [2138] | 07-SRNP-55822 | 669 | [0n] | bp |
| Staphylococcus aureus | [2139] | 07-SRNP-23532 | 669 | [0n] | bp |
| Staphylococcus aureus | [2140] | 07-SRNP-65029 | 669 | [0n] | bp |
| Staphylococcus aureus | [2141] | 08-SRNP-55775 | 669 | [0n] | bp |
| Staphylococcus aureus | [2142] | 03-SRNP-1698  | 669 | [0n] | bp |
| Staphylococcus aureus | [2143] | 04-SRNP-22010 | 669 | [0n] | bp |
| Staphylococcus aureus | [2144] | 04-SRNP-45540 | 669 | [0n] | bp |
| Staphylococcus aureus | [2145] | 05-SRNP-24781 | 669 | [0n] | bp |
| Staphylococcus aureus | [2146] | 04-SRNP-20669 | 669 | [0n] | bp |
| Staphylococcus aureus | [2147] | 05-SRNP-20931 | 636 | [0n] | bp |
| Staphylococcus aureus | [2148] | 02-SRNP-5681  | 669 | [2n] | bp |
| Staphylococcus aureus | [2149] | 03-SRNP-1969  | 669 | [0n] | bp |
| Staphylococcus aureus | [2150] | 02-SRNP-15215 | 669 | [0n] | bp |
| Staphylococcus aureus | [2151] | 02-SRNP-5917  | 669 | [0n] | bp |
| Staphylococcus aureus | [2152] | 04-SRNP-20841 | 669 | [0n] | bp |
| Staphylococcus aureus | [2153] | 03-SRNP-28724 | 669 | [0n] | bp |
| Staphylococcus aureus | [2154] | 02-SRNP-14335 | 669 | [0n] | bp |
| Staphylococcus aureus | [2155] | 06-SRNP-57164 | 669 | [0n] | bp |
| Staphylococcus aureus | [2156] | 06-SRNP-22103 | 669 | [0n] | bp |
| Staphylococcus aureus | [2157] | 06-SRNP-22892 | 669 | [0n] | bp |
| Staphylococcus aureus | [2158] | 07-SRNP-55155 | 669 | [0n] | bp |
| Staphylococcus aureus | [2159] | 08-SRNP-65738 | 669 | [0n] | bp |
| Staphylococcus aureus | [2160] | 08-SRNP-24000 | 669 | [0n] | bp |
| Staphylococcus aureus | [2161] | 00-SRNP-6527  | 669 | [5n] | bp |
| Staphylococcus aureus | [2162] | 05-SRNP-55694 | 669 | [2n] | bp |
| Staphylococcus aureus | [2163] | 00-SRNP-6505  | 609 | [4n] | bp |
| Staphylococcus aureus | [2164] | 02-SRNP-17510 | 669 | [1n] | bp |
| Staphylococcus aureus | [2165] | 02-SRNP-5531  | 669 | [1n] | bp |
| Staphylococcus aureus | [2166] | 98-SRNP-5974  | 669 | [0n] | bp |
| Staphylococcus aureus | [2167] | 00-SRNP-6532  | 669 | [0n] | bp |
| Staphylococcus aureus | [2168] | 02-SRNP-5688  | 669 | [0n] | bp |
| Staphylococcus aureus | [2169] | 00-SRNP-20190 | 669 | [0n] | bp |
| Staphylococcus aureus | [2170] | 03-SRNP-2688  | 669 | [0n] | bp |
| Staphylococcus aureus | [2171] | 03-SRNP-2728  | 669 | [0n] | bp |
| Staphylococcus aureus | [2172] | 04-SRNP-20603 | 669 | [0n] | bp |
| Staphylococcus aureus | [2173] | 02-SRNP-28722 | 669 | [0n] | bp |
| Staphylococcus aureus | [2174] | 02-SRNP-5769  | 669 | [0n] | bp |
| Staphylococcus aureus | [2175] | 05-SRNP-55695 | 669 | [0n] | bp |
| Staphylococcus aureus | [2176] | 05-SRNP-22538 | 669 | [0n] | bp |
| Staphylococcus aureus | [2177] | 04-SRNP-22976 | 669 | [0n] | bp |
| Staphylococcus aureus | [2178] | 04-SRNP-23046 | 669 | [0n] | bp |
| Staphylococcus aureus | [2179] | 98-SRNP-5973  | 594 | [0n] | bp |
| Staphylococcus aureus | [2180] | 00-SRNP-6536  | 576 | [0n] | bp |
| Staphylococcus aureus | [2181] | 08-SRNP-55660 | 669 | [0n] | bp |
| Staphylococcus aureus | [2182] | 08-SRNP-55779 | 669 | [0n] | bp |
| Staphylococcus aureus | [2183] | 08-SRNP-55777 | 669 | [0n] | bp |
| Staphylococcus aureus | [2184] | 00-SRNP-20191 | 669 | [1n] | bp |
| Staphylococcus aureus | [2185] | 08-SRNP-55729 | 669 | [0n] | bp |
| Staphylococcus aureus | [2186] | 07-SRNP-55831 | 669 | [0n] | bp |
| Staphylococcus aureus | [2187] | 06-SRNP-18820 | 669 | [0n] | bp |
| Staphylococcus aureus | [2188] | 02-SRNP-5529  | 669 | [0n] | bp |
| Staphylococcus aureus | [2189] | 00-SRNP-6529  | 669 | [0n] | bp |
| Staphylococcus aureus | [2190] | 03-SRNP-2686  | 669 | [0n] | bp |
| Staphylococcus aureus | [2191] | 00-SRNP-6598  | 669 | [0n] | bp |
| Staphylococcus aureus | [2192] | 00-SRNP-7041  | 669 | [0n] | bp |
| Staphylococcus aureus | [2193] | 04-SRNP-22251 | 669 | [0n] | bp |
| Staphylococcus aureus | [2194] | 04-SRNP-22252 | 669 | [0n] | bp |
| Staphylococcus aureus | [2195] | 05-SRNP-55771 | 669 | [0n] | bp |
| Staphylococcus aureus | [2196] | 05-SRNP-55417 | 669 | [0n] | bp |
| Staphylococcus aureus | [2197] | 03-SRNP-2646  | 669 | [0n] | bp |
| Staphylococcus aureus | [2198] | 02-SRNP-27769 | 669 | [0n] | bp |
| Staphylococcus aureus | [2199] | 02-SRNP-27768 | 669 | [0n] | bp |
| Staphylococcus aureus | [2200] | 00-SRNP-7042  | 669 | [0n] | bp |

Staphylus azteca [2197] | 02-SRNP-27769 | 669 [0n]bp  
 Staphylus azteca [2198] | 02-SRNP-27769 | 669 [0n]bp  
 Staphylus azteca [2199] | 02-SRNP-27768 | 669 [0n]bp  
 Staphylus azteca [2200] | 00-SRNP-7043 | 669 [2n]bp  
 Staphylus azteca [2201] | 03-SRNP-19829 | 669 [0n]bp  
 Staphylus azteca [2202] | 02-SRNP-27766 | 669 [0n]bp  
 Staphylus azteca [2203] | 98-SRNP-13484 | 669 [0n]bp  
 Staphylus azteca [2204] | 00-SRNP-6518 | 654 [0n]bp  
 Staphylus azteca [2205] | 02-SRNP-27389 | 627 [1n]bp  
 Staphylus azteca [2206] | 00-SRNP-6585 | 603 [0n]bp  
 Staphylus azteca [2207] | 00-SRNP-6599 | 606 [0n]bp  
 Staphylus azteca [2208] | 07-SRNP-55820 | 663 [0n]bp  
 Staphylus azteca [2209] | 00-SRNP-20193 | 669 [1n]bp  
 Staphylus azteca [2210] | 02-SRNP-27392 | 669 [2n]bp  
 Staphylus azteca [2211] | 08-SRNP-55943 | 669 [0n]bp  
 Staphylus azteca [2212] | 98-SRNP-5691 | 669 [0n]bp  
 Staphylus azteca [2213] | 02-SRNP-29445 | 669 [0n]bp  
 Staphylus azteca [2214] | 02-SRNP-27393 | 669 [0n]bp  
 Staphylus azteca [2215] | 00-SRNP-6587 | 669 [0n]bp  
 Staphylus azteca [2216] | 00-SRNP-6533 | 603 [0n]bp  
 Staphylus azteca [2217] | 07-SRNP-55875 | 669 [0n]bp  
 Staphylus azteca [2218] | 08-SRNP-55945 | 669 [0n]bp  
 Staphylus azteca [2219] | 09-SRNP-68493 | 669 [0n]bp  
 Staphylus caribbea [2220] | 07-SRNP-65990 | 669 [7n]bp  
 Staphylus caribbea [2221] | 05-SRNP-6745 | 567 [3n]bp  
 Staphylus caribbea [2222] | 08-SRNP-6754 | 453 [0n]bp  
 Staphylus caribbea [2223] | 07-SRNP-22962 | 669 [4n]bp  
 Staphylus caribbea [2224] | 04-SRNP-42021 | 627 [0n]bp  
 Staphylus caribbea [2225] | 07-SRNP-3050 | 669 [1n]bp  
 Staphylus caribbea [2226] | 06-SRNP-2133 | 669 [2n]bp  
 Staphylus caribbea [2227] | 07-SRNP-3052 | 621 [4n]bp  
 Staphylus caribbea [2228] | 06-SRNP-316 | 573 [0n]bp  
 Staphylus caribbea [2229] | 09-SRNP-75511 | 669 [0n]bp  
 Staphylus caribbea [2230] | 09-SRNP-42728 | 669 [0n]bp  
 Staphylus caribbea [2231] | 09-SRNP-68492 | 669 [0n]bp  
 Staphylus caribbea [2232] | 06-SRNP-6883 | 552 [0n]bp  
 Staphylus caribbea [2233] | 05-SRNP-7211 | 669 [0n]bp  
 Staphylus caribbea [2234] | 05-SRNP-7214 | 669 [0n]bp  
 Staphylus caribbea [2235] | 05-SRNP-6743 | 669 [0n]bp  
 Staphylus caribbea [2236] | 05-SRNP-6797 | 669 [0n]bp  
 Staphylus caribbea [2237] | 05-SRNP-7213 | 669 [0n]bp  
 Staphylus caribbea [2238] | 05-SRNP-6906 | 669 [0n]bp  
 Staphylus caribbea [2239] | 05-SRNP-7752 | 669 [0n]bp  
 Staphylus caribbea [2240] | 04-SRNP-42026 | 669 [0n]bp  
 Staphylus caribbea [2241] | 04-SRNP-42022 | 669 [0n]bp  
 Staphylus caribbea [2242] | 05-SRNP-7750 | 627 [0n]bp  
 Staphylus caribbea [2243] | 06-SRNP-5510 | 645 [0n]bp  
 Staphylus caribbea [2244] | 06-SRNP-9444 | 669 [0n]bp  
 Staphylus caribbea [2245] | 06-SRNP-8603 | 669 [0n]bp  
 Staphylus caribbea [2246] | 06-SRNP-8454 | 669 [0n]bp  
 Staphylus caribbea [2247] | 06-SRNP-9154 | 669 [0n]bp  
 Staphylus caribbea [2248] | 06-SRNP-9158 | 669 [0n]bp  
 Staphylus caribbea [2249] | 06-SRNP-6882 | 669 [0n]bp  
 Staphylus caribbea [2250] | 07-SRNP-3051 | 669 [0n]bp  
 Staphylus caribbea [2251] | 08-SRNP-6933 | 669 [0n]bp  
 Staphylus caribbea [2252] | 09-SRNP-44334 | 669 [0n]bp  
 Staphylus caribbea [2253] | 09-SRNP-44524 | 669 [0n]bp  
 Staphylus caribbea [2254] | 09-SRNP-75315 | 669 [0n]bp  
 Staphylus caribbea [2255] | 09-SRNP-68494 | 669 [0n]bp  
 Staphylus caribbea [2256] | 09-SRNP-44999 | 669 [0n]bp  
 Spioniades artemides [2257] | 07-SRNP-65617 | 660 [0n]bp  
 Spioniades abbreviata [2258] | 05-SRNP-40403 | 669 [1n]bp  
 Spioniades abbreviata [2259] | 05-SRNP-6908 | 669 [1n]bp  
 Spioniades abbreviata [2260] | 03-SRNP-20661 | 663 [0n]bp  
 Spioniades abbreviata [2261] | 03-SRNP-20234 | 663 [0n]bp  
 Spioniades abbreviata [2262] | 04-SRNP-42534 | 669 [0n]bp  
 Spioniades abbreviata [2263] | 08-SRNP-70324 | 669 [0n]bp  
 Spioniades abbreviata [2264] | 09-SRNP-72126 | 669 [0n]bp  
 Grais stigmaticus [2265] | 95-SRNP-11369 | 576 [0n]bp  
 Doberes anticus [2266] | 00-SRNP-9187 | 669 [0n]bp  
 Doberes anticus [2267] | 00-SRNP-9201 | 627 [0n]bp  
 Doberes anticus [2268] | 00-SRNP-9246 | 663 [1n]bp  
 Achlyodes pallida [2269] | 06-SRNP-55557 | 669 [1n]bp  
 Achlyodes pallida [2270] | 04-SRNP-35303 | 669 [0n]bp  
 Achlyodes pallida [2271] | 04-SRNP-46891 | 669 [0n]bp  
 Achlyodes pallida [2272] | 04-SRNP-35345 | 669 [0n]bp  
 Achlyodes pallida [2273] | 04-SRNP-35699 | 669 [0n]bp  
 Achlyodes pallida [2274] | 06-SRNP-59832 | 669 [0n]bp  
 Achlyodes pallida [2275] | 05-SRNP-35395 | 669 [0n]bp  
 Achlyodes pallida [2276] | 07-SRNP-1848 | 669 [0n]bp  
 Achlyodes pallida [2277] | 05-SRNP-2176 | 669 [0n]bp  
 Achlyodes pallida [2278] | 05-SRNP-59488 | 669 [0n]bp  
 Achlyodes pallida [2279] | 06-SRNP-60158 | 669 [0n]bp  
 Achlyodes pallida [2280] | 06-SRNP-58206 | 669 [0n]bp  
 Achlyodes pallida [2281] | 04-SRNP-61445 | 669 [0n]bp  
 Achlyodes pallida [2282] | 04-SRNP-35305 | 669 [0n]bp  
 Achlyodes pallida [2283] | 04-SRNP-35977 | 669 [0n]bp  
 Achlyodes pallida [2284] | 04-SRNP-35301 | 669 [0n]bp  
 Achlyodes pallida [2285] | 04-SRNP-35304 | 669 [0n]bp  
 Achlyodes pallida [2286] | 04-SRNP-45082 | 669 [0n]bp  
 Achlyodes pallida [2287] | 06-SRNP-55370 | 486 [0n]bp  
 Achlyodes pallida [2288] | 03-SRNP-3397 | 528 [0n]bp  
 Achlyodes pallida [2289] | 06-SRNP-60271 | 636 [0n]bp  
 Achlyodes pallida [2290] | 02-SRNP-23406 | 576 [0n]bp  
 Achlyodes pallida [2291] | 04-SRNP-35390 | 576 [0n]bp  
 Achlyodes pallida [2292] | 07-SRNP-35141 | 435 [0n]bp  
 Achlyodes pallida [2293] | 07-SRNP-35829 | 633 [0n]bp  
 Achlyodes pallida [2294] | 07-SRNP-36029 | 627 [0n]bp  
 Achlyodes pallida [2295] | 09-SRNP-57230 | 669 [0n]bp  
 Eantis thraso [2296] | 07-SRNP-1978 | 669 [0n]bp  
 Eantis thraso [2297] | 06-SRNP-22421 | 669 [0n]bp  
 Eantis thraso [2298] | 96-SRNP-1072 | 573 [0n]bp  
 Eantis thraso [2299] | 96-SRNP-262 | 576 [0n]bp  
 Eantis thraso [2300] | 96-SRNP-40288 | 669 [0n]bp



|                         |        |               |           |
|-------------------------|--------|---------------|-----------|
| Eantis thraso           | [2297] | 06-SRNP-22421 | 669[0n]bp |
| Eantis thraso           | [2298] | 96-SRNP-1072  | 573[0n]bp |
| Eantis thraso           | [2299] | 96-SRNP-262   | 576[0n]bp |
| Eantis thraso           | [2300] | 04-SRNP-49038 | 669[0n]bp |
| Eantis thraso           | [2301] | 04-SRNP-41151 | 669[0n]bp |
| Eantis thraso           | [2302] | 04-SRNP-50037 | 669[0n]bp |
| Eantis thraso           | [2303] | 04-SRNP-45216 | 669[0n]bp |
| Eantis thraso           | [2304] | 04-SRNP-48345 | 669[0n]bp |
| Eantis thraso           | [2305] | 04-SRNP-15358 | 669[0n]bp |
| Eantis thraso           | [2306] | 04-SRNP-4114  | 669[0n]bp |
| Eantis thraso           | [2307] | 94-SRNP-279   | 669[0n]bp |
| Eantis thraso           | [2308] | 07-SRNP-21152 | 669[0n]bp |
| Eantis thraso           | [2309] | 07-SRNP-1975  | 669[0n]bp |
| Eantis thraso           | [2310] | 04-SRNP-45084 | 669[0n]bp |
| Eantis thraso           | [2311] | 08-SRNP-6018  | 663[2n]bp |
| Achlyodes busirus       | [2312] | 03-SRNP-5736  | 540[0n]bp |
| Achlyodes busirus       | [2313] | 07-SRNP-1804  | 669[0n]bp |
| Achlyodes busirus       | [2314] | 07-SRNP-56770 | 669[0n]bp |
| Achlyodes busirus       | [2315] | 07-SRNP-55259 | 669[0n]bp |
| Achlyodes busirus       | [2316] | 07-SRNP-2136  | 669[0n]bp |
| Achlyodes busirus       | [2317] | 07-SRNP-1984  | 669[0n]bp |
| Achlyodes busirus       | [2318] | 07-SRNP-55258 | 669[0n]bp |
| Achlyodes busirus       | [2319] | 07-SRNP-55531 | 669[0n]bp |
| Achlyodes busirus       | [2320] | 06-SRNP-44397 | 669[0n]bp |
| Achlyodes busirus       | [2321] | 06-SRNP-44330 | 669[0n]bp |
| Achlyodes busirus       | [2322] | 06-SRNP-9750  | 669[0n]bp |
| Achlyodes busirus       | [2323] | 06-SRNP-59206 | 669[0n]bp |
| Achlyodes busirus       | [2324] | 06-SRNP-44403 | 669[0n]bp |
| Achlyodes busirus       | [2325] | 04-SRNP-47915 | 669[0n]bp |
| Achlyodes busirus       | [2326] | 04-SRNP-48202 | 669[0n]bp |
| Achlyodes busirus       | [2327] | 04-SRNP-48915 | 669[0n]bp |
| Achlyodes busirus       | [2328] | 04-SRNP-48497 | 669[0n]bp |
| Achlyodes busirus       | [2329] | 04-SRNP-32916 | 669[0n]bp |
| Achlyodes busirus       | [2330] | 04-SRNP-48413 | 669[0n]bp |
| Achlyodes busirus       | [2331] | 06-SRNP-44329 | 618[1n]bp |
| Achlyodes busirus       | [2332] | 06-SRNP-44395 | 624[1n]bp |
| Achlyodes busirus       | [2333] | 03-SRNP-5928  | 642[0n]bp |
| Achlyodes busirus       | [2334] | 06-SRNP-58729 | 609[0n]bp |
| Achlyodes busirus       | [2335] | 06-SRNP-44631 | 621[0n]bp |
| Achlyodes busirus       | [2336] | 06-SRNP-59810 | 630[2n]bp |
| Achlyodes busirus       | [2337] | 07-SRNP-1973  | 654[1n]bp |
| Achlyodes busirus       | [2338] | 07-SRNP-57186 | 645[0n]bp |
| Achlyodes busirus       | [2339] | 07-SRNP-45267 | 669[0n]bp |
| Achlyodes busirus       | [2340] | 07-SRNP-45958 | 669[0n]bp |
| Achlyodes busirus       | [2341] | 08-SRNP-2576  | 669[0n]bp |
| Achlyodes busirus       | [2342] | 08-SRNP-70349 | 669[0n]bp |
| Achlyodes busirus       | [2343] | 08-SRNP-70359 | 669[0n]bp |
| Achlyodes busirus       | [2344] | 08-SRNP-2332  | 669[0n]bp |
| Achlyodes busirus       | [2345] | 08-SRNP-2138  | 669[0n]bp |
| Achlyodes busirus       | [2346] | 08-SRNP-30931 | 669[0n]bp |
| Achlyodes busirus       | [2347] | 08-SRNP-20760 | 669[0n]bp |
| Achlyodes busirus       | [2348] | 08-SRNP-2135  | 669[0n]bp |
| Achlyodes busirus       | [2349] | 08-SRNP-4869  | 669[0n]bp |
| Achlyodes busirus       | [2350] | 08-SRNP-5054  | 669[0n]bp |
| Achlyodes busirus       | [2351] | 09-SRNP-69109 | 669[0n]bp |
| Aethilla echina         | [2352] | 05-SRNP-20    | 669[0n]bp |
| Aethilla lavochreaDHJ01 | [2353] | 08-SRNP-23841 | 669[0n]bp |
| Aethilla lavochreaDHJ02 | [2354] | 07-SRNP-24077 | 669[0n]bp |
| Aethilla lavochreaDHJ02 | [2355] | 08-SRNP-55465 | 669[0n]bp |
| Aethilla lavochreaDHJ02 | [2356] | 08-SRNP-22923 | 669[0n]bp |
| Aethilla lavochreaDHJ02 | [2357] | 09-SRNP-4333  | 669[0n]bp |
| Aethilla lavochreaDHJ02 | [2358] | 02-SRNP-14545 | 669[1n]bp |
| Aethilla lavochreaDHJ02 | [2359] | 00-SRNP-2103  | 669[0n]bp |
| Aethilla lavochreaDHJ02 | [2360] | 02-SRNP-4022  | 669[0n]bp |
| Aethilla lavochreaDHJ02 | [2361] | 00-SRNP-4557  | 669[0n]bp |
| Aethilla lavochreaDHJ02 | [2362] | 00-SRNP-2105  | 669[0n]bp |
| Aethilla lavochreaDHJ02 | [2363] | 02-SRNP-4467  | 669[0n]bp |
| Aethilla lavochreaDHJ02 | [2364] | 00-SRNP-4261  | 669[0n]bp |
| Aethilla lavochreaDHJ02 | [2365] | 00-SRNP-4439  | 669[0n]bp |
| Aethilla lavochreaDHJ02 | [2366] | 00-SRNP-4556  | 669[0n]bp |
| Aethilla lavochreaDHJ02 | [2367] | 00-SRNP-4260  | 669[0n]bp |
| Aethilla lavochreaDHJ02 | [2368] | 04-SRNP-49719 | 627[0n]bp |
| Aethilla lavochreaDHJ02 | [2369] | 08-SRNP-23663 | 669[0n]bp |
| Aethilla lavochreaDHJ02 | [2370] | 08-SRNP-23664 | 669[0n]bp |
| Aethilla lavochreaDHJ02 | [2371] | 09-SRNP-4334  | 669[1n]bp |
| Ephyriades eugramma     | [2372] | 03-SRNP-3195  | 489[0n]bp |
| Ephyriades eugramma     | [2373] | 03-SRNP-3270  | 663[0n]bp |
| Ephyriades eugramma     | [2374] | 03-SRNP-22990 | 663[0n]bp |
| Ephyriades eugramma     | [2375] | 03-SRNP-22535 | 663[0n]bp |
| Ephyriades eugramma     | [2376] | 07-SRNP-35417 | 648[0n]bp |
| Ephyriades eugramma     | [2377] | 08-SRNP-31277 | 669[0n]bp |
| Ephyriades eugramma     | [2378] | 08-SRNP-35337 | 669[0n]bp |
| Ephyriades eugramma     | [2379] | 09-SRNP-35830 | 669[0n]bp |
| Ephyriades eugramma     | [2380] | 09-SRNP-35828 | 669[0n]bp |
| Cycloglypha thrasibulus | [2381] | 06-SRNP-55047 | 669[0n]bp |
| Cycloglypha thrasibulus | [2382] | 06-SRNP-1733  | 669[0n]bp |
| Cycloglypha thrasibulus | [2383] | 05-SRNP-2186  | 669[0n]bp |
| Cycloglypha thrasibulus | [2384] | 05-SRNP-56292 | 669[0n]bp |
| Cycloglypha thrasibulus | [2385] | 05-SRNP-2205  | 669[0n]bp |
| Cycloglypha thrasibulus | [2386] | 06-SRNP-40014 | 669[0n]bp |
| Cycloglypha thrasibulus | [2387] | 07-SRNP-55252 | 669[0n]bp |
| Cycloglypha thrasibulus | [2388] | 07-SRNP-55550 | 669[0n]bp |
| Cycloglypha thrasibulus | [2389] | 07-SRNP-55357 | 669[0n]bp |
| Cycloglypha thrasibulus | [2390] | 06-SRNP-18966 | 669[0n]bp |
| Cycloglypha thrasibulus | [2391] | 06-SRNP-18825 | 669[0n]bp |
| Cycloglypha thrasibulus | [2392] | 06-SRNP-19741 | 669[0n]bp |
| Cycloglypha thrasibulus | [2393] | 07-SRNP-59528 | 669[0n]bp |
| Cycloglypha thrasibulus | [2394] | 08-SRNP-56046 | 669[0n]bp |
| Cycloglypha thrasibulus | [2395] | 01-SRNP-18101 | 669[0n]bp |
| Cycloglypha thrasibulus | [2396] | 05-SRNP-40775 | 669[0n]bp |
| Cycloglypha thrasibulus | [2397] | 02-SRNP-31147 | 669[0n]bp |
| Cycloglypha thrasibulus | [2398] | 02-SRNP-7413  | 669[0n]bp |
| Cycloglypha thrasibulus | [2399] | 02-SRNP-4616  | 669[0n]bp |
| Cycloglypha thrasibulus | [2400] | 02-SRNP-3633  | 669[0n]bp |

|                         |        |               |           |
|-------------------------|--------|---------------|-----------|
| Cycloglypha thrasibulus | [2397] | 02-SRNP-3114  | 669[0n]bp |
| Cycloglypha thrasibulus | [2398] | 02-SRNP-7413  | 669[0n]bp |
| Cycloglypha thrasibulus | [2399] | 02-SRNP-4616  | 669[0n]bp |
| Cycloglypha thrasibulus | [2400] | 02-SRNP-3233  | 669[0n]bp |
| Cycloglypha thrasibulus | [2401] | 04-SRNP-3850  | 669[0n]bp |
| Cycloglypha thrasibulus | [2402] | 04-SRNP-14593 | 669[0n]bp |
| Cycloglypha thrasibulus | [2403] | 04-SRNP-55588 | 669[0n]bp |
| Cycloglypha thrasibulus | [2404] | 05-SRNP-55022 | 669[0n]bp |
| Cycloglypha thrasibulus | [2405] | 04-SRNP-15456 | 669[0n]bp |
| Cycloglypha thrasibulus | [2406] | 02-SRNP-32143 | 669[0n]bp |
| Cycloglypha thrasibulus | [2407] | 99-SRNP-18551 | 540[0n]bp |
| Cycloglypha thrasibulus | [2408] | 02-SRNP-31149 | 642[0n]bp |
| Cycloglypha thrasibulus | [2409] | 01-SRNP-4284  | 636[0n]bp |
| Cycloglypha thrasibulus | [2410] | 04-SRNP-45636 | 534[0n]bp |
| Cycloglypha thrasibulus | [2411] | 07-SRNP-23056 | 618[0n]bp |
| Cycloglypha thrasibulus | [2412] | 04-SRNP-15458 | 618[0n]bp |
| Cycloglypha thrasibulus | [2413] | 06-SRNP-19660 | 669[0n]bp |
| Cycloglypha thrasibulus | [2414] | 08-SRNP-56190 | 669[0n]bp |
| Cycloglypha thrasibulus | [2415] | 08-SRNP-56183 | 669[0n]bp |
| Cycloglypha thrasibulus | [2416] | 08-SRNP-21510 | 669[0n]bp |
| Cycloglypha thrasibulus | [2417] | 08-SRNP-56623 | 669[0n]bp |
| Cycloglypha thrasibulus | [2418] | 08-SRNP-57718 | 669[0n]bp |
| Cycloglypha thrasibulus | [2419] | 08-SRNP-36360 | 669[0n]bp |
| Ebrietas evanidus       | [2420] | 05-SRNP-24244 | 669[0n]bp |
| Ebrietas evanidus       | [2421] | 06-SRNP-3928  | 609[0n]bp |
| Ebrietas evanidus       | [2422] | 08-SRNP-4776  | 669[0n]bp |
| Chiomara mithrax        | [2423] | 08-SRNP-71174 | 669[0n]bp |
| Camptopleura theramenes | [2424] | 05-SRNP-23809 | 669[0n]bp |
| Camptopleura theramenes | [2425] | 06-SRNP-46916 | 645[0n]bp |
| Camptopleura auxoDHJ01  | [2426] | 05-SRNP-43216 | 630[0n]bp |
| Camptopleura auxoDHJ01  | [2427] | 82-SRNP-324   | 624[0n]bp |
| Camptopleura auxoDHJ01  | [2428] | 06-SRNP-65116 | 609[0n]bp |
| Camptopleura auxoDHJ01  | [2429] | 07-SRNP-42068 | 669[0n]bp |
| Camptopleura auxoDHJ01  | [2430] | 07-SRNP-42282 | 669[0n]bp |
| Camptopleura auxoDHJ01  | [2431] | 08-SRNP-71022 | 669[0n]bp |
| Camptopleura auxoDHJ02  | [2432] | 03-SRNP-31276 | 669[0n]bp |
| Camptopleura auxoDHJ02  | [2433] | 07-SRNP-41965 | 669[0n]bp |
| Camptopleura auxoDHJ02  | [2434] | 07-SRNP-24033 | 669[0n]bp |
| Camptopleura auxoDHJ02  | [2435] | 07-SRNP-42067 | 669[0n]bp |
| Camptopleura auxoDHJ02  | [2436] | 07-SRNP-42191 | 669[0n]bp |
| Camptopleura auxoDHJ02  | [2437] | 06-SRNP-42908 | 669[0n]bp |
| Camptopleura auxoDHJ02  | [2438] | 04-SRNP-40680 | 645[1n]bp |
| Camptopleura auxoDHJ02  | [2439] | 05-SRNP-43763 | 576[0n]bp |
| Camptopleura auxoDHJ02  | [2440] | 07-SRNP-40646 | 642[0n]bp |
| Camptopleura auxoDHJ02  | [2441] | 08-SRNP-65495 | 669[1n]bp |
| Camptopleura auxoDHJ02  | [2442] | 08-SRNP-65880 | 669[0n]bp |
| Mylon salvia            | [2443] | 06-SRNP-1769  | 669[0n]bp |
| Mylon salvia            | [2444] | 02-SRNP-16859 | 630[4n]bp |
| Mylon salvia            | [2445] | 02-SRNP-27057 | 612[5n]bp |
| Mylon salvia            | [2446] | 02-SRNP-14878 | 669[0n]bp |
| Mylon salvia            | [2447] | 05-SRNP-32566 | 624[0n]bp |
| Mylon salvia            | [2448] | 02-SRNP-14879 | 537[0n]bp |
| Mylon salvia            | [2449] | 02-SRNP-14882 | 669[0n]bp |
| Mylon salvia            | [2450] | 02-SRNP-14815 | 669[0n]bp |
| Mylon salvia            | [2451] | 06-SRNP-22322 | 669[0n]bp |
| Mylon salvia            | [2452] | 03-SRNP-3274  | 645[0n]bp |
| Mylon salvia            | [2453] | 02-SRNP-14880 | 669[0n]bp |
| Mylon salvia            | [2454] | 02-SRNP-14883 | 669[0n]bp |
| Mylon salvia            | [2455] | 02-SRNP-14884 | 645[0n]bp |
| Mylon maimon            | [2456] | 06-SRNP-65117 | 669[0n]bp |
| Mylon maimon            | [2457] | 04-SRNP-15734 | 669[0n]bp |
| Mylon maimon            | [2458] | 04-SRNP-15726 | 669[0n]bp |
| Mylon maimon            | [2459] | 06-SRNP-33362 | 609[0n]bp |
| Mylon maimon            | [2460] | 06-SRNP-55541 | 669[0n]bp |
| Mylon maimon            | [2461] | 05-SRNP-33196 | 669[0n]bp |
| Mylon maimon            | [2462] | 05-SRNP-45185 | 669[0n]bp |
| Mylon maimon            | [2463] | 04-SRNP-15661 | 669[0n]bp |
| Mylon maimon            | [2464] | 04-SRNP-15653 | 669[0n]bp |
| Mylon maimon            | [2465] | 02-SRNP-33927 | 657[0n]bp |
| Mylon maimon            | [2466] | 04-SRNP-25458 | 645[3n]bp |
| Mylon maimon            | [2467] | 05-SRNP-34629 | 624[0n]bp |
| Mylon maimon            | [2468] | 96-SRNP-9924  | 576[0n]bp |
| Mylon maimon            | [2469] | 05-SRNP-66553 | 477[0n]bp |
| Mylon maimon            | [2470] | 07-SRNP-60850 | 669[0n]bp |
| Mylon lassia            | [2471] | 04-SRNP-47729 | 669[0n]bp |
| Mylon lassia            | [2472] | 04-SRNP-49068 | 669[0n]bp |
| Mylon lassia            | [2473] | 05-SRNP-46313 | 669[0n]bp |
| Mylon lassia            | [2474] | 07-SRNP-45249 | 669[0n]bp |
| Mylon lassia            | [2475] | 09-SRNP-22793 | 669[0n]bp |
| Mylon lassia            | [2476] | 06-SRNP-32968 | 669[0n]bp |
| Mylon lassia            | [2477] | 04-SRNP-47995 | 669[1n]bp |
| Mylon lassia            | [2478] | 05-SRNP-45388 | 669[1n]bp |
| Mylon lassia            | [2479] | 06-SRNP-33008 | 669[1n]bp |
| Mylon lassia            | [2480] | 05-SRNP-32431 | 669[0n]bp |
| Mylon lassia            | [2481] | 05-SRNP-35383 | 669[0n]bp |
| Mylon lassia            | [2482] | 05-SRNP-45964 | 669[0n]bp |
| Mylon lassia            | [2483] | 04-SRNP-48829 | 669[0n]bp |
| Mylon lassia            | [2484] | 04-SRNP-49039 | 669[0n]bp |
| Mylon lassia            | [2485] | 06-SRNP-31605 | 669[0n]bp |
| Mylon lassia            | [2486] | 02-SRNP-28954 | 654[0n]bp |
| Mylon lassia            | [2487] | 02-SRNP-28773 | 624[0n]bp |
| Mylon lassia            | [2488] | 04-SRNP-32066 | 630[0n]bp |
| Mylon lassia            | [2489] | 04-SRNP-35482 | 591[0n]bp |
| Mylon lassia            | [2490] | 07-SRNP-33635 | 645[0n]bp |
| Mylon lassia            | [2491] | 09-SRNP-36601 | 669[0n]bp |
| Mylon lassia            | [2492] | 09-SRNP-22448 | 669[0n]bp |
| Timochares trifasciata  | [2493] | 05-SRNP-13161 | 429[0n]bp |
| Timochares trifasciata  | [2494] | 05-SRNP-12097 | 609[0n]bp |
| Timochares trifasciata  | [2495] | 03-SRNP-12286 | 588[0n]bp |
| Timochares trifasciata  | [2496] | 05-SRNP-12096 | 687[0n]bp |
| Timochares trifasciata  | [2497] | 05-SRNP-13158 | 669[1n]bp |
| Timochares trifasciata  | [2498] | 05-SRNP-13159 | 669[1n]bp |
| Timochares trifasciata  | [2499] | 03-SRNP-13719 | 669[0n]bp |
| Timochares trifasciata  | [2500] | 05-SRNP-40802 | 669[0n]bp |

Timochares trifasciata| [2497] | 05-SRNP-13130 | 669[1n]bp  
 Timochares trifasciata| [2498] | 05-SRNP-13159 | 669[1n]bp  
 Timochares trifasciata| [2499] | 03-SRNP-13719 | 669[0n]bp  
 Timochares trifasciata| [2500] | 05-SRNP-40802 | 669[2n]bp  
 Timochares trifasciata| [2501] | 05-SRNP-13162 | 687[0n]bp  
 Timochares trifasciata| [2502] | 04-SRNP-14040 | 669[0n]bp  
 Timochares trifasciata| [2503] | 04-SRNP-14041 | 669[0n]bp  
 Timochares trifasciata| [2504] | 03-SRNP-960 | 669[0n]bp  
 Timochares trifasciata| [2505] | 03-SRNP-14113 | 669[0n]bp  
 Timochares trifasciata| [2506] | 05-SRNP-19552 | 630[0n]bp  
 Timochares trifasciata| [2507] | 08-SRNP-72653 | 669[0n]bp  
 Helias cama| [2508] | 01-SRNP-9588 | 510[2n]bp  
 Helias cama| [2509] | 05-SRNP-30554 | 669[0n]bp  
 Helias cama| [2510] | 05-SRNP-6813 | 669[0n]bp  
 Helias cama| [2511] | 06-SRNP-41760 | 669[0n]bp  
 Helias cama| [2512] | 07-SRNP-20080 | 669[0n]bp  
 Helias cama| [2513] | 08-SRNP-70554 | 669[0n]bp  
 Helias cama| [2514] | 02-SRNP-15049 | 573[0n]bp  
 Helias cama| [2515] | 04-SRNP-31168 | 669[0n]bp  
 Helias cama| [2516] | 05-SRNP-30170 | 669[0n]bp  
 Helias cama| [2517] | 04-SRNP-30824 | 669[0n]bp  
 Helias cama| [2518] | 05-SRNP-31048 | 669[0n]bp  
 Helias cama| [2519] | 05-SRNP-31049 | 669[0n]bp  
 Helias cama| [2520] | 05-SRNP-31193 | 669[0n]bp  
 Helias cama| [2521] | 05-SRNP-3359 | 669[0n]bp  
 Helias cama| [2522] | 05-SRNP-3199 | 669[0n]bp  
 Helias cama| [2523] | 05-SRNP-2671 | 669[0n]bp  
 Helias cama| [2524] | 06-SRNP-453 | 669[0n]bp  
 Helias cama| [2525] | 06-SRNP-2367 | 669[0n]bp  
 Helias cama| [2526] | 07-SRNP-30806 | 669[0n]bp  
 Helias cama| [2527] | 06-SRNP-22077 | 669[0n]bp  
 Helias cama| [2528] | 07-SRNP-20157 | 669[0n]bp  
 Helias cama| [2529] | 07-SRNP-65129 | 669[0n]bp  
 Helias cama| [2530] | 08-SRNP-2560 | 669[0n]bp  
 Helias cama| [2531] | 08-SRNP-2431 | 669[0n]bp  
 Helias cama| [2532] | 08-SRNP-72018 | 669[0n]bp  
 Helias cama| [2533] | 09-SRNP-30202 | 669[0n]bp  
 Helias cama| [2534] | 09-SRNP-30198 | 669[0n]bp  
 Ebrietas osyris| [2535] | 05-SRNP-20008 | 669[0n]bp  
 Ebrietas osyris| [2536] | 05-SRNP-34654 | 669[0n]bp  
 Ebrietas osyris| [2537] | 08-SRNP-70289 | 669[0n]bp  
 Ebrietas osyris| [2538] | 08-SRNP-72341 | 669[0n]bp  
 Cycloglypha enega| [2539] | 08-SRNP-32246 | 669[0n]bp  
 Ebrietas anacreonDHJ04| [2540] | 07-SRNP-61246 | 669[0n]bp  
 Ebrietas anacreonDHJ04| [2541] | 07-SRNP-66037 | 669[0n]bp  
 Ebrietas anacreonDHJ02| [2542] | 07-SRNP-30890 | 669[0n]bp  
 Ebrietas anacreonDHJ02| [2543] | 01-SRNP-17938 | 669[1n]bp  
 Ebrietas anacreonDHJ02| [2544] | 93-SRNP-5851 | 669[0n]bp  
 Ebrietas anacreonDHJ02| [2545] | 06-SRNP-30797 | 669[0n]bp  
 Ebrietas anacreonDHJ02| [2546] | 04-SRNP-31276 | 630[0n]bp  
 Ebrietas anacreonDHJ02| [2547] | 04-SRNP-30931 | 633[0n]bp  
 Ebrietas anacreonDHJ02| [2548] | 06-SRNP-59644 | 669[0n]bp  
 Ebrietas anacreonDHJ02| [2549] | 07-SRNP-31391 | 669[1n]bp  
 Ebrietas anacreonDHJ02| [2550] | 06-SRNP-30796 | 669[0n]bp  
 Ebrietas anacreonDHJ02| [2551] | 06-SRNP-31143 | 669[0n]bp  
 Ebrietas anacreonDHJ02| [2552] | 06-SRNP-23020 | 669[0n]bp  
 Ebrietas anacreonDHJ02| [2553] | 07-SRNP-59135 | 669[0n]bp  
 Ebrietas anacreonDHJ02| [2554] | 08-SRNP-23566 | 669[0n]bp  
 Ebrietas anacreonDHJ02| [2555] | 09-SRNP-30594 | 669[0n]bp  
 Ebrietas anacreonDHJ03| [2556] | 93-SRNP-5844 | 621[2n]bp  
 Ebrietas anacreonDHJ03| [2557] | 01-SRNP-18080 | 669[2n]bp  
 Ebrietas anacreonDHJ03| [2558] | 94-SRNP-282 | 669[1n]bp  
 Ebrietas anacreonDHJ03| [2559] | 05-SRNP-33161 | 669[0n]bp  
 Ebrietas anacreonDHJ03| [2560] | 06-SRNP-30257 | 669[0n]bp  
 Ebrietas anacreonDHJ03| [2561] | 05-SRNP-24345 | 669[0n]bp  
 Ebrietas anacreonDHJ03| [2562] | 04-SRNP-32065 | 669[0n]bp  
 Ebrietas anacreonDHJ03| [2563] | 01-SRNP-18079 | 669[0n]bp  
 Ebrietas anacreonDHJ03| [2564] | 93-SRNP-5879 | 669[0n]bp  
 Ebrietas anacreonDHJ03| [2565] | 02-SRNP-32566 | 621[0n]bp  
 Ebrietas anacreonDHJ03| [2566] | 93-SRNP-5847 | 585[0n]bp  
 Ebrietas anacreonDHJ03| [2567] | 93-SRNP-5836 | 534[0n]bp  
 Ebrietas anacreonDHJ03| [2568] | 93-SRNP-5928 | 633[0n]bp  
 Ebrietas anacreonDHJ03| [2569] | 02-SRNP-28985 | 633[0n]bp  
 Ebrietas anacreonDHJ03| [2570] | 93-SRNP-5876 | 597[0n]bp  
 Ebrietas anacreonDHJ03| [2571] | 93-SRNP-5846 | 609[0n]bp  
 Ebrietas anacreonDHJ03| [2572] | 93-SRNP-6182 | 609[0n]bp  
 Ebrietas anacreonDHJ03| [2573] | 93-SRNP-5839 | 600[3n]bp  
 Ebrietas anacreonDHJ03| [2574] | 93-SRNP-5629 | 591[1n]bp  
 Ebrietas anacreonDHJ03| [2575] | 93-SRNP-5840 | 582[0n]bp  
 Ebrietas anacreonDHJ03| [2576] | 05-SRNP-31047 | 627[0n]bp  
 Ebrietas anacreonDHJ03| [2577] | 05-SRNP-66020 | 627[0n]bp  
 Ebrietas anacreonDHJ03| [2578] | 06-SRNP-30135 | 669[0n]bp  
 Ebrietas anacreonDHJ03| [2579] | 06-SRNP-30138 | 669[0n]bp  
 Ebrietas anacreonDHJ03| [2580] | 06-SRNP-30137 | 669[0n]bp  
 Ebrietas anacreonDHJ03| [2581] | 06-SRNP-55045 | 669[0n]bp  
 Ebrietas anacreonDHJ03| [2582] | 06-SRNP-30798 | 669[0n]bp  
 Ebrietas anacreonDHJ03| [2583] | 06-SRNP-32332 | 669[0n]bp  
 Ebrietas anacreonDHJ03| [2584] | 07-SRNP-55471 | 669[0n]bp  
 Ebrietas anacreonDHJ03| [2585] | 08-SRNP-23847 | 669[0n]bp  
 Ebrietas anacreonDHJ03| [2586] | 09-SRNP-71739 | 669[0n]bp  
 Ebrietas anacreonDHJ03| [2587] | 09-SRNP-57295 | 669[0n]bp  
 Ebrietas anacreonDHJ03| [2588] | 09-SRNP-12023 | 669[0n]bp  
 Potamanaxas Burns01| [2589] | 91-SRNP-132 | 354[1n]bp  
 Potamanaxas Burns01| [2590] | 07-SRNP-31875 | 648[0n]bp  
 Potamanaxas Burns02| [2591] | 07-SRNP-65900 | 669[0n]bp  
 Potamanaxas Burns02| [2592] | 07-SRNP-65901 | 669[0n]bp  
 Potamanaxas Burns02| [2593] | 09-SRNP-71252 | 669[0n]bp  
 Mylon pelopidas| [2594] | 00-SRNP-6099 | 669[0n]bp  
 Mylon pelopidas| [2595] | 00-SRNP-6369 | 669[0n]bp  
 Mylon pelopidas| [2596] | 00-SRNP-6128 | 669[0n]bp  
 Mylon pelopidas| [2597] | 06-SRNP-12608 | 669[0n]bp  
 Mylon pelopidas| [2598] | 01-SRNP-17181 | 663[0n]bp  
 Mylon pelopidas| [2599] | 03-SRNP-649 | 657[0n]bp

Mylon pelopidas|[2597]|00-SRNP-12000|663[0n]bp  
 Mylon pelopidas|[2598]|01-SRNP-17181|663[0n]bp  
 Mylon pelopidas|[2599]|03-SRNP-649|657[0n]bp  
 Mylon pelopidas|[2600]|99-SRNP-6171|633[0n]bp  
 Mylon pelopidas|[2601]|97-SRNP-2965|645[0n]bp  
 Mylon pelopidas|[2602]|97-SRNP-3873|645[0n]bp  
 Mylon pelopidas|[2603]|02-SRNP-10065|648[1n]bp  
 Mylon pelopidas|[2604]|03-SRNP-12052|642[0n]bp  
 Mylon pelopidas|[2605]|93-SRNP-4445|633[1n]bp  
 Mylon pelopidas|[2606]|05-SRNP-55075|624[0n]bp  
 Mylon pelopidas|[2607]|97-SRNP-54|573[0n]bp  
 Mylon pelopidas|[2608]|94-SRNP-9689|600[0n]bp  
 Mylon pelopidas|[2609]|95-SRNP-6458|612[0n]bp  
 Mylon pelopidas|[2610]|07-SRNP-55508|633[0n]bp  
 Mylon pelopidas|[2611]|07-SRNP-55502|669[0n]bp  
 Mylon pelopidas|[2612]|07-SRNP-55540|669[0n]bp  
 Mylon pelopidas|[2613]|07-SRNP-55977|669[0n]bp  
 Mylon pelopidas|[2614]|07-SRNP-55365|669[0n]bp  
 Mylon pelopidas|[2615]|08-SRNP-55556|669[0n]bp  
 Potamanaxas Burns03|[2616]|07-SRNP-32749|669[0n]bp  
 Potamanaxas Burns03|[2617]|07-SRNP-32750|666[1n]bp  
 Potamanaxas Burns03|[2618]|07-SRNP-32792|669[0n]bp  
 Sostrata pusilla|[2619]|05-SRNP-7425|669[1n]bp  
 Sostrata pusilla|[2620]|07-SRNP-30539|669[0n]bp  
 Sostrata pusilla|[2621]|06-SRNP-4305|669[0n]bp  
 Sostrata pusilla|[2622]|06-SRNP-2403|669[0n]bp  
 Sostrata pusilla|[2623]|05-SRNP-1719|669[0n]bp  
 Sostrata pusilla|[2624]|05-SRNP-1859|669[0n]bp  
 Sostrata pusilla|[2625]|05-SRNP-41675|669[0n]bp  
 Sostrata pusilla|[2626]|04-SRNP-3394|669[0n]bp  
 Sostrata pusilla|[2627]|02-SRNP-18306|657[0n]bp  
 Sostrata pusilla|[2628]|05-SRNP-42029|645[0n]bp  
 Sostrata pusilla|[2629]|07-SRNP-1449|633[0n]bp  
 Sostrata pusilla|[2630]|07-SRNP-2998|669[0n]bp  
 Sostrata pusilla|[2631]|08-SRNP-30865|669[0n]bp  
 Sostrata bifasciata nordica|[2632]|03-SRNP-1099|648[0n]bp  
 Sostrata bifasciata nordica|[2633]|05-SRNP-2227|669[0n]bp  
 Sostrata bifasciata nordica|[2634]|08-SRNP-844|669[0n]bp  
 Sostrata bifasciata nordica|[2635]|07-SRNP-1567|669[0n]bp  
 Sostrata bifasciata nordica|[2636]|07-SRNP-1932|669[0n]bp  
 Sostrata bifasciata nordica|[2637]|07-SRNP-58638|669[0n]bp  
 Sostrata bifasciata nordica|[2638]|06-SRNP-3708|627[0n]bp  
 Sostrata bifasciata nordica|[2639]|06-SRNP-3696|666[0n]bp  
 Sostrata bifasciata nordica|[2640]|05-SRNP-213|669[0n]bp  
 Sostrata bifasciata nordica|[2641]|05-SRNP-214|669[0n]bp  
 Sostrata bifasciata nordica|[2642]|04-SRNP-22231|669[0n]bp  
 Sostrata bifasciata nordica|[2643]|04-SRNP-61492|669[0n]bp  
 Sostrata bifasciata nordica|[2644]|04-SRNP-61382|669[0n]bp  
 Sostrata bifasciata nordica|[2645]|04-SRNP-3640|669[0n]bp  
 Sostrata bifasciata nordica|[2646]|04-SRNP-1343|669[0n]bp  
 Sostrata bifasciata nordica|[2647]|04-SRNP-22116|669[0n]bp  
 Sostrata bifasciata nordica|[2648]|04-SRNP-2136|669[0n]bp  
 Sostrata bifasciata nordica|[2649]|05-SRNP-211|669[0n]bp  
 Sostrata bifasciata nordica|[2650]|04-SRNP-50041|669[0n]bp  
 Sostrata bifasciata nordica|[2651]|05-SRNP-212|669[0n]bp  
 Sostrata bifasciata nordica|[2652]|05-SRNP-296|669[1n]bp  
 Sostrata bifasciata nordica|[2653]|05-SRNP-2711|546[0n]bp  
 Sostrata bifasciata nordica|[2654]|04-SRNP-47237|657[0n]bp  
 Sostrata bifasciata nordica|[2655]|03-SRNP-5074|657[0n]bp  
 Sostrata bifasciata nordica|[2656]|08-SRNP-24554|612[0n]bp  
 Sostrata bifasciata nordica|[2657]|04-SRNP-23519|669[0n]bp  
 Sostrata bifasciata nordica|[2658]|04-SRNP-24494|669[0n]bp  
 Sostrata bifasciata nordica|[2659]|04-SRNP-22118|669[0n]bp  
 Sostrata bifasciata nordica|[2660]|05-SRNP-47046|669[0n]bp  
 Sostrata bifasciata nordica|[2661]|05-SRNP-4845|669[0n]bp  
 Sostrata bifasciata nordica|[2662]|05-SRNP-32215|669[0n]bp  
 Sostrata bifasciata nordica|[2663]|05-SRNP-46868|669[0n]bp  
 Sostrata bifasciata nordica|[2664]|05-SRNP-3026|669[0n]bp  
 Sostrata bifasciata nordica|[2665]|05-SRNP-45186|669[0n]bp  
 Sostrata bifasciata nordica|[2666]|05-SRNP-2678|669[0n]bp  
 Sostrata bifasciata nordica|[2667]|05-SRNP-31549|669[0n]bp  
 Sostrata bifasciata nordica|[2668]|05-SRNP-22997|669[0n]bp  
 Sostrata bifasciata nordica|[2669]|05-SRNP-40774|669[0n]bp  
 Sostrata bifasciata nordica|[2670]|05-SRNP-707|669[0n]bp  
 Sostrata bifasciata nordica|[2671]|05-SRNP-2270|669[0n]bp  
 Sostrata bifasciata nordica|[2672]|05-SRNP-295|669[0n]bp  
 Sostrata bifasciata nordica|[2673]|05-SRNP-6575|669[0n]bp  
 Sostrata bifasciata nordica|[2674]|05-SRNP-33197|669[0n]bp  
 Sostrata bifasciata nordica|[2675]|06-SRNP-1499|669[0n]bp  
 Sostrata bifasciata nordica|[2676]|06-SRNP-55120|669[0n]bp  
 Sostrata bifasciata nordica|[2677]|06-SRNP-3033|669[0n]bp  
 Sostrata bifasciata nordica|[2678]|06-SRNP-7519|669[0n]bp  
 Sostrata bifasciata nordica|[2679]|06-SRNP-23019|669[0n]bp  
 Sostrata bifasciata nordica|[2680]|07-SRNP-637|669[0n]bp  
 Sostrata bifasciata nordica|[2681]|07-SRNP-36575|669[0n]bp  
 Sostrata bifasciata nordica|[2682]|07-SRNP-58637|669[0n]bp  
 Sostrata bifasciata nordica|[2683]|07-SRNP-36790|669[0n]bp  
 Sostrata bifasciata nordica|[2684]|08-SRNP-2265|669[0n]bp  
 Sostrata bifasciata nordica|[2685]|08-SRNP-1977|669[0n]bp  
 Sostrata bifasciata nordica|[2686]|07-SRNP-60822|669[0n]bp  
 Sostrata bifasciata nordica|[2687]|08-SRNP-35027|669[0n]bp  
 Sostrata bifasciata nordica|[2688]|08-SRNP-36391|669[0n]bp  
 Sostrata bifasciata nordica|[2689]|09-SRNP-30271|669[0n]bp  
 Sostrata bifasciata nordica|[2690]|09-SRNP-35749|669[0n]bp  
 Sostrata bifasciata nordica|[2691]|09-SRNP-35141|669[0n]bp  
 Gesta gesta|[2692]|05-SRNP-62098|627[0n]bp  
 Gesta gesta|[2693]|96-SRNP-10372|576[0n]bp  
 Gesta gesta|[2694]|06-SRNP-18550|669[0n]bp  
 Gesta gesta|[2695]|05-SRNP-61955|669[1n]bp  
 Gesta gesta|[2696]|93-SRNP-5391|579[1n]bp  
 Gesta gesta|[2697]|05-SRNP-63396|627[0n]bp  
 Gesta gesta|[2698]|06-SRNP-18548|669[0n]bp  
 Gesta gesta|[2699]|06-SRNP-19618|648[1n]bp  
 Gesta gesta|[2700]|06-SRNP-18548|669[0n]bp

```

Gesta gesta|[2697]|05-SRNP-18548|669[0n]bp
Gesta gesta|[2698]|06-SRNP-18548|669[0n]bp
Gesta gesta|[2699]|06-SRNP-19618|648[1n]bp
Gesta gesta|[2700]|06-SRNP-18549|651[0n]bp
Gesta gesta|[2701]|04-SRNP-15977|669[0n]bp
Gesta gesta|[2702]|05-SRNP-63399|669[0n]bp
Gesta gesta|[2703]|07-SRNP-61370|669[0n]bp
Gesta gesta|[2704]|07-SRNP-61369|669[0n]bp
Erynnis tristis|[2705]|07-SRNP-55295|540[3n]bp
Erynnis tristis|[2706]|09-SRNP-55044|651[0n]bp
Erynnis tristis|[2707]|07-SRNP-55321|645[0n]bp
Erynnis tristis|[2708]|02-SRNP-10325|573[1n]bp
Erynnis tristis|[2709]|09-SRNP-55140|666[0n]bp
Erynnis tristis|[2710]|06-SRNP-57856|669[0n]bp
Erynnis tristis|[2711]|06-SRNP-57862|669[0n]bp
Erynnis tristis|[2712]|06-SRNP-57467|669[0n]bp
Erynnis tristis|[2713]|06-SRNP-57463|669[0n]bp
Erynnis tristis|[2714]|06-SRNP-57863|669[0n]bp
Erynnis tristis|[2715]|06-SRNP-57940|669[0n]bp
Erynnis tristis|[2716]|01-SRNP-15342|669[0n]bp
Erynnis tristis|[2717]|05-SRNP-64103|669[0n]bp
Erynnis tristis|[2718]|05-SRNP-64104|669[0n]bp
Erynnis tristis|[2719]|04-SRNP-12369|669[0n]bp
Erynnis tristis|[2720]|01-SRNP-16043|603[0n]bp
Erynnis tristis|[2721]|05-SRNP-13296|594[0n]bp
Erynnis tristis|[2722]|06-SRNP-57870|627[0n]bp
Erynnis tristis|[2723]|02-SRNP-10318|642[1n]bp
Erynnis tristis|[2724]|08-SRNP-58579|633[0n]bp
Erynnis tristis|[2725]|06-SRNP-57465|648[0n]bp
Erynnis tristis|[2726]|05-SRNP-64102|645[0n]bp
Erynnis tristis|[2727]|02-SRNP-10323|615[2n]bp
Erynnis tristis|[2728]|02-SRNP-10320|615[0n]bp
Erynnis tristis|[2729]|08-SRNP-58610|408[0n]bp
Erynnis tristis|[2730]|08-SRNP-58615|669[0n]bp
Anastrus sempiternus|[2731]|01-SRNP-17323|594[0n]bp
Anastrus sempiternus|[2732]|08-SRNP-2645|669[0n]bp
Anastrus sempiternus|[2733]|07-SRNP-4363|669[0n]bp
Anastrus sempiternus|[2734]|07-SRNP-4306|669[0n]bp
Anastrus sempiternus|[2735]|07-SRNP-32152|669[0n]bp
Anastrus sempiternus|[2736]|07-SRNP-12147|669[0n]bp
Anastrus sempiternus|[2737]|07-SRNP-55616|669[0n]bp
Anastrus sempiternus|[2738]|06-SRNP-60163|669[0n]bp
Anastrus sempiternus|[2739]|06-SRNP-60206|669[0n]bp
Anastrus sempiternus|[2740]|06-SRNP-57897|669[0n]bp
Anastrus sempiternus|[2741]|06-SRNP-57895|669[0n]bp
Anastrus sempiternus|[2742]|06-SRNP-57849|669[0n]bp
Anastrus sempiternus|[2743]|06-SRNP-23197|669[0n]bp
Anastrus sempiternus|[2744]|05-SRNP-64291|669[0n]bp
Anastrus sempiternus|[2745]|05-SRNP-64292|669[0n]bp
Anastrus sempiternus|[2746]|05-SRNP-1770|669[0n]bp
Anastrus sempiternus|[2747]|04-SRNP-4595|669[0n]bp
Anastrus sempiternus|[2748]|08-SRNP-66006|645[0n]bp
Anastrus sempiternus|[2749]|08-SRNP-58583|657[0n]bp
Anastrus sempiternus|[2750]|07-SRNP-4302|669[0n]bp
Anastrus sempiternus|[2751]|01-SRNP-17736|570[0n]bp
Anastrus sempiternus|[2752]|09-SRNP-57315|669[0n]bp
Clito aberrans|[2753]|06-SRNP-12726|669[0n]bp
Clito aberrans|[2754]|07-SRNP-55359|669[0n]bp
Clito aberrans|[2755]|05-SRNP-46256|657[1n]bp
Clito aberrans|[2756]|08-SRNP-55841|669[0n]bp
Clito aberrans|[2757]|99-SRNP-18483|528[0n]bp
Clito aberrans|[2758]|94-SRNP-3152|576[0n]bp
Clito aberrans|[2759]|05-SRNP-46254|669[0n]bp
Clito aberrans|[2760]|05-SRNP-46249|669[0n]bp
Clito aberrans|[2761]|06-SRNP-15483|669[0n]bp
Clito aberrans|[2762]|07-SRNP-3664|669[0n]bp
Clito aberrans|[2763]|07-SRNP-3662|669[0n]bp
Clito aberrans|[2764]|07-SRNP-3660|669[0n]bp
Clito aberrans|[2765]|08-SRNP-4314|669[0n]bp
Clito aberrans|[2766]|08-SRNP-4317|669[0n]bp
Clito aberrans|[2767]|08-SRNP-4315|669[0n]bp
Clito aberrans|[2768]|08-SRNP-4313|669[0n]bp
Clito Burns01|[2769]|05-SRNP-34516|669[0n]bp
Clito Burns01|[2770]|01-SRNP-9229|663[0n]bp
Clito Burns01|[2771]|01-SRNP-9304|657[0n]bp
Clito Burns01|[2772]|04-SRNP-21031|645[0n]bp
Clito Burns01|[2773]|08-SRNP-30288|660[0n]bp
Clito Burns01|[2774]|08-SRNP-70430|669[0n]bp
Anastrus neaeris|[2775]|05-SRNP-6078|630[0n]bp
Anastrus neaeris|[2776]|07-SRNP-65050|669[1n]bp
Anastrus neaeris|[2777]|05-SRNP-5537|669[0n]bp
Anastrus neaeris|[2778]|04-SRNP-60781|669[0n]bp
Anastrus neaeris|[2779]|04-SRNP-60867|669[0n]bp
Anastrus neaeris|[2780]|04-SRNP-60780|669[0n]bp
Anastrus neaeris|[2781]|02-SRNP-18593|657[0n]bp
Anastrus neaeris|[2782]|07-SRNP-65052|669[0n]bp
Anastrus neaeris|[2783]|04-SRNP-60339|669[0n]bp
Anastrus neaeris|[2784]|06-SRNP-1371|393[0n]bp
Anastrus neaeris|[2785]|06-SRNP-1373|393[0n]bp
Anastrus neaeris|[2786]|06-SRNP-1372|396[0n]bp
Anastrus neaeris|[2787]|07-SRNP-65051|633[0n]bp
Anastrus neaeris|[2788]|07-SRNP-35858|669[0n]bp
Anastrus neaeris|[2789]|08-SRNP-65477|669[0n]bp
Anastrus neaeris|[2790]|08-SRNP-65478|669[0n]bp
Anastrus neaeris|[2791]|08-SRNP-40484|669[0n]bp
Anastrus neaeris|[2792]|08-SRNP-65476|669[0n]bp
Anastrus neaeris|[2793]|08-SRNP-2106|669[0n]bp
Anastrus neaeris|[2794]|02-SRNP-16276|624[0n]bp
Anastrus neaeris|[2795]|04-SRNP-56411|588[0n]bp
Anastrus neaeris|[2796]|04-SRNP-34562|669[0n]bp
Anastrus neaeris|[2797]|08-SRNP-36419|669[0n]bp
Anastrus neaeris|[2798]|09-SRNP-67369|669[0n]bp
Eracon cliniasDHJ02|[2799]|05-SRNP-1688|669[2n]bp
Eracon cliniasDHJ02|[2800]|08-SRNP-40702|669[0n]bp

```

Anastreus neaeris | [2798] | 09-SRNP-67369 | 669[0n]bp

Eracon cliniasDHJ02 | [2799] | 05-SRNP-1688 | 669[2n]bp  
 Eracon cliniasDHJ02 | [2800] | 09-SRNP-40707 | 669[0n]bp  
 Eracon cliniasDHJ01 | [2801] | 05-SRNP-43583 | 669[0n]bp  
 Eracon cliniasDHJ01 | [2802] | 05-SRNP-22364 | 669[5n]bp  
 Eracon cliniasDHJ01 | [2803] | 07-SRNP-42619 | 669[0n]bp  
 Eracon cliniasDHJ01 | [2804] | 07-SRNP-42093 | 669[0n]bp  
 Eracon cliniasDHJ01 | [2805] | 07-SRNP-2980 | 669[0n]bp  
 Eracon cliniasDHJ01 | [2806] | 06-SRNP-44151 | 669[0n]bp  
 Eracon cliniasDHJ01 | [2807] | 06-SRNP-40016 | 669[0n]bp  
 Eracon cliniasDHJ01 | [2808] | 05-SRNP-7368 | 669[0n]bp  
 Eracon cliniasDHJ01 | [2809] | 05-SRNP-22120 | 669[0n]bp  
 Eracon cliniasDHJ01 | [2810] | 05-SRNP-22121 | 669[0n]bp  
 Eracon cliniasDHJ01 | [2811] | 05-SRNP-22467 | 669[1n]bp  
 Eracon cliniasDHJ01 | [2812] | 07-SRNP-42094 | 663[0n]bp  
 Eracon cliniasDHJ01 | [2813] | 03-SRNP-37802 | 663[0n]bp  
 Eracon cliniasDHJ01 | [2814] | 01-SRNP-5247 | 663[0n]bp  
 Eracon cliniasDHJ01 | [2815] | 05-SRNP-1713 | 576[0n]bp  
 Eracon cliniasDHJ01 | [2816] | 05-SRNP-22396 | 648[1n]bp  
 Eracon cliniasDHJ01 | [2817] | 05-SRNP-3449 | 561[0n]bp  
 Eracon cliniasDHJ01 | [2818] | 05-SRNP-1714 | 567[0n]bp  
 Eracon cliniasDHJ01 | [2819] | 01-SRNP-5289 | 645[0n]bp  
 Eracon cliniasDHJ01 | [2820] | 05-SRNP-3823 | 621[0n]bp  
 Eracon cliniasDHJ01 | [2821] | 05-SRNP-4520 | 642[2n]bp  
 Eracon cliniasDHJ01 | [2822] | 07-SRNP-42620 | 648[0n]bp  
 Eracon cliniasDHJ01 | [2823] | 08-SRNP-65365 | 669[0n]bp  
 Eracon cliniasDHJ01 | [2824] | 08-SRNP-21838 | 669[0n]bp  
 Eracon cliniasDHJ01 | [2825] | 08-SRNP-41449 | 669[0n]bp  
 Eracon cliniasDHJ01 | [2826] | 08-SRNP-41450 | 669[0n]bp  
 Eracon cliniasDHJ01 | [2827] | 09-SRNP-1734 | 669[0n]bp

Chiomara georgina | [2828] | 07-SRNP-55431 | 669[0n]bp  
 Chiomara georgina | [2829] | 03-SRNP-12148 | 630[0n]bp  
 Chiomara georgina | [2830] | 07-SRNP-20138 | 669[0n]bp  
 Chiomara georgina | [2831] | 08-SRNP-55568 | 669[0n]bp  
 Chiomara georgina | [2832] | 06-SRNP-12610 | 669[0n]bp  
 Chiomara georgina | [2833] | 04-SRNP-14129 | 669[0n]bp  
 Chiomara georgina | [2834] | 04-SRNP-14128 | 669[0n]bp  
 Chiomara georgina | [2835] | 04-SRNP-14583 | 669[0n]bp  
 Chiomara georgina | [2836] | 03-SRNP-12149 | 624[1n]bp  
 Chiomara georgina | [2837] | 05-SRNP-12171 | 627[0n]bp  
 Chiomara georgina | [2838] | 06-SRNP-22681 | 642[0n]bp  
 Chiomara georgina | [2839] | 06-SRNP-22680 | 669[0n]bp  
 Chiomara georgina | [2840] | 07-SRNP-12184 | 669[0n]bp  
 Chiomara georgina | [2841] | 07-SRNP-55287 | 669[0n]bp  
 Chiomara georgina | [2842] | 07-SRNP-20170 | 669[0n]bp  
 Chiomara georgina | [2843] | 07-SRNP-57560 | 669[0n]bp  
 Chiomara georgina | [2844] | 09-SRNP-72879 | 669[0n]bp

Gorgythion begga pyralinaDHJ01 | [2845] | 01-SRNP-15890 | 669[0n]bp  
 Gorgythion begga pyralinaDHJ01 | [2846] | 02-SRNP-16048 | 516[0n]bp  
 Gorgythion begga pyralinaDHJ01 | [2847] | 02-SRNP-32020 | 516[0n]bp  
 Gorgythion begga pyralinaDHJ01 | [2848] | 05-SRNP-31852 | 669[0n]bp  
 Gorgythion begga pyralinaDHJ01 | [2849] | 07-SRNP-20872 | 528[0n]bp  
 Gorgythion begga pyralinaDHJ01 | [2850] | 05-SRNP-358 | 669[1n]bp  
 Gorgythion begga pyralinaDHJ01 | [2851] | 05-SRNP-40713 | 669[0n]bp  
 Gorgythion begga pyralinaDHJ01 | [2852] | 05-SRNP-1709 | 669[0n]bp  
 Gorgythion begga pyralinaDHJ01 | [2853] | 05-SRNP-40714 | 669[0n]bp  
 Gorgythion begga pyralinaDHJ01 | [2854] | 05-SRNP-1707 | 669[0n]bp  
 Gorgythion begga pyralinaDHJ01 | [2855] | 05-SRNP-1706 | 669[0n]bp  
 Gorgythion begga pyralinaDHJ01 | [2856] | 05-SRNP-1710 | 669[0n]bp  
 Gorgythion begga pyralinaDHJ01 | [2857] | 05-SRNP-64097 | 669[0n]bp  
 Gorgythion begga pyralinaDHJ01 | [2858] | 06-SRNP-531 | 669[0n]bp  
 Gorgythion begga pyralinaDHJ01 | [2859] | 06-SRNP-532 | 669[0n]bp  
 Gorgythion begga pyralinaDHJ01 | [2860] | 06-SRNP-41261 | 669[0n]bp  
 Gorgythion begga pyralinaDHJ01 | [2861] | 06-SRNP-31441 | 669[0n]bp  
 Gorgythion begga pyralinaDHJ01 | [2862] | 06-SRNP-2368 | 669[0n]bp  
 Gorgythion begga pyralinaDHJ01 | [2863] | 06-SRNP-20632 | 669[0n]bp  
 Gorgythion begga pyralinaDHJ01 | [2864] | 06-SRNP-41943 | 669[0n]bp  
 Gorgythion begga pyralinaDHJ01 | [2865] | 97-SRNP-5411 | 669[0n]bp  
 Gorgythion begga pyralinaDHJ01 | [2866] | 00-SRNP-2146 | 669[0n]bp  
 Gorgythion begga pyralinaDHJ01 | [2867] | 00-SRNP-2408 | 669[0n]bp  
 Gorgythion begga pyralinaDHJ01 | [2868] | 99-SRNP-2221 | 669[0n]bp  
 Gorgythion begga pyralinaDHJ01 | [2869] | 99-SRNP-15519 | 669[0n]bp  
 Gorgythion begga pyralinaDHJ01 | [2870] | 00-SRNP-11026 | 669[0n]bp  
 Gorgythion begga pyralinaDHJ01 | [2871] | 99-SRNP-15470 | 669[0n]bp  
 Gorgythion begga pyralinaDHJ01 | [2872] | 00-SRNP-3210 | 669[0n]bp  
 Gorgythion begga pyralinaDHJ01 | [2873] | 99-SRNP-4380 | 669[0n]bp  
 Gorgythion begga pyralinaDHJ01 | [2874] | 98-SRNP-4012 | 669[0n]bp  
 Gorgythion begga pyralinaDHJ01 | [2875] | 04-SRNP-50125 | 669[0n]bp  
 Gorgythion begga pyralinaDHJ01 | [2876] | 04-SRNP-14948 | 669[0n]bp  
 Gorgythion begga pyralinaDHJ01 | [2877] | 06-SRNP-1869 | 669[0n]bp  
 Gorgythion begga pyralinaDHJ01 | [2878] | 06-SRNP-1799 | 669[0n]bp  
 Gorgythion begga pyralinaDHJ01 | [2879] | 98-SRNP-4195 | 669[0n]bp  
 Gorgythion begga pyralinaDHJ01 | [2880] | 04-SRNP-45528 | 669[0n]bp  
 Gorgythion begga pyralinaDHJ01 | [2881] | 04-SRNP-21113 | 669[0n]bp  
 Gorgythion begga pyralinaDHJ01 | [2882] | 04-SRNP-45237 | 669[0n]bp  
 Gorgythion begga pyralinaDHJ01 | [2883] | 07-SRNP-55339 | 669[0n]bp  
 Gorgythion begga pyralinaDHJ01 | [2884] | 08-SRNP-70487 | 669[0n]bp  
 Gorgythion begga pyralinaDHJ01 | [2885] | 08-SRNP-45022 | 669[0n]bp  
 Gorgythion begga pyralinaDHJ01 | [2886] | 08-SRNP-20764 | 669[0n]bp  
 Gorgythion begga pyralinaDHJ01 | [2887] | 08-SRNP-30986 | 669[0n]bp  
 Gorgythion begga pyralinaDHJ01 | [2888] | 08-SRNP-30987 | 669[0n]bp  
 Gorgythion begga pyralinaDHJ01 | [2889] | 05-SRNP-24241 | 669[0n]bp  
 Gorgythion begga pyralinaDHJ01 | [2890] | 05-SRNP-24247 | 669[0n]bp  
 Gorgythion begga pyralinaDHJ01 | [2891] | 02-SRNP-32047 | 669[0n]bp  
 Gorgythion begga pyralinaDHJ01 | [2892] | 02-SRNP-2287 | 669[0n]bp  
 Gorgythion begga pyralinaDHJ01 | [2893] | 02-SRNP-32909 | 669[0n]bp  
 Gorgythion begga pyralinaDHJ01 | [2894] | 02-SRNP-5882 | 669[0n]bp  
 Gorgythion begga pyralinaDHJ01 | [2895] | 02-SRNP-13764 | 669[0n]bp  
 Gorgythion begga pyralinaDHJ01 | [2896] | 02-SRNP-5878 | 669[0n]bp  
 Gorgythion begga pyralinaDHJ01 | [2897] | 02-SRNP-14308 | 669[0n]bp  
 Gorgythion begga pyralinaDHJ01 | [2898] | 01-SRNP-4872 | 669[0n]bp  
 Gorgythion begga pyralinaDHJ01 | [2899] | 02-SRNP-13763 | 669[0n]bp

Gorgythion begga pyralinaDHJ01|2897|02-SRNP-14308|669[0n]bp  
 -Gorgythion begga pyralinaDHJ01|[2898]|01-SRNP-4872|669[0n]bp  
 Gorgythion begga pyralinaDHJ01|[2899]|02-SRNP-13763|669[0n]bp  
 -Gorgythion begga pyralinaDHJ01|[2900]|04-SRNP-15314|669[0n]bp  
 Gorgythion begga pyralinaDHJ01|[2901]|02-SRNP-2285|474[2n]bp  
 Gorgythion begga pyralinaDHJ01|[2902]|06-SRNP-30280|669[0n]bp  
 Gorgythion begga pyralinaDHJ01|[2903]|05-SRNP-206|663[0n]bp  
 Gorgythion begga pyralinaDHJ01|[2904]|06-SRNP-753|645[0n]bp  
 Gorgythion begga pyralinaDHJ01|[2905]|05-SRNP-23371|630[0n]bp  
 Gorgythion begga pyralinaDHJ01|[2906]|06-SRNP-1800|627[0n]bp  
 Gorgythion begga pyralinaDHJ01|[2907]|04-SRNP-27297|627[0n]bp  
 Gorgythion begga pyralinaDHJ01|[2908]|96-SRNP-886|606[0n]bp  
 Gorgythion begga pyralinaDHJ01|[2909]|06-SRNP-30794|642[0n]bp  
 Gorgythion begga pyralinaDHJ01|[2910]|99-SRNP-322|624[0n]bp  
 -Gorgythion begga pyralinaDHJ01|[2911]|99-SRNP-298|618[1n]bp  
 Gorgythion begga pyralinaDHJ01|[2912]|96-SRNP-12038|618[1n]bp  
 Gorgythion begga pyralinaDHJ01|[2913]|99-SRNP-2514|615[1n]bp  
 Gorgythion begga pyralinaDHJ01|[2914]|06-SRNP-263|609[0n]bp  
 Gorgythion begga pyralinaDHJ01|[2915]|95-SRNP-6465|615[0n]bp  
 Gorgythion begga pyralinaDHJ01|[2916]|03-SRNP-28548|576[0n]bp  
 Gorgythion begga pyralinaDHJ01|[2917]|02-SRNP-17248|576[1n]bp  
 -Gorgythion begga pyralinaDHJ01|[2918]|92-SRNP-3165|378[0n]bp  
 -Gorgythion begga pyralinaDHJ01|[2919]|07-SRNP-20992|540[1n]bp  
 Gorgythion begga pyralinaDHJ01|[2920]|07-SRNP-20948|633[0n]bp  
 Gorgythion begga pyralinaDHJ01|[2921]|08-SRNP-40557|669[0n]bp  
 Gorgythion begga pyralinaDHJ01|[2922]|08-SRNP-70553|321[0n]bp  
 Gorgythion begga pyralinaDHJ02|[2923]|03-SRNP-1239|516[0n]bp  
 Gorgythion begga pyralinaDHJ02|[2924]|03-SRNP-20279|516[0n]bp  
 Gorgythion begga pyralinaDHJ02|[2925]|03-SRNP-1176|516[0n]bp  
 Gorgythion begga pyralinaDHJ02|[2926]|05-SRNP-33821|429[2n]bp  
 Gorgythion begga pyralinaDHJ02|[2927]|05-SRNP-33754|669[4n]bp  
 Gorgythion begga pyralinaDHJ02|[2928]|05-SRNP-33763|669[0n]bp  
 Gorgythion begga pyralinaDHJ02|[2929]|01-SRNP-17454|669[0n]bp  
 -Gorgythion begga pyralinaDHJ02|[2930]|06-SRNP-40222|666[0n]bp  
 Gorgythion begga pyralinaDHJ02|[2931]|07-SRNP-55213|666[2n]bp  
 Gorgythion begga pyralinaDHJ02|[2932]|01-SRNP-1269|669[1n]bp  
 Gorgythion begga pyralinaDHJ02|[2933]|08-SRNP-20679|669[0n]bp  
 Gorgythion begga pyralinaDHJ02|[2934]|08-SRNP-24442|669[0n]bp  
 Gorgythion begga pyralinaDHJ02|[2935]|07-SRNP-60837|669[0n]bp  
 Gorgythion begga pyralinaDHJ02|[2936]|08-SRNP-2157|669[0n]bp  
 Gorgythion begga pyralinaDHJ02|[2937]|06-SRNP-19738|669[0n]bp  
 Gorgythion begga pyralinaDHJ02|[2938]|07-SRNP-55196|669[0n]bp  
 Gorgythion begga pyralinaDHJ02|[2939]|99-SRNP-2400|669[0n]bp  
 Gorgythion begga pyralinaDHJ02|[2940]|98-SRNP-4745|669[0n]bp  
 Gorgythion begga pyralinaDHJ02|[2941]|00-SRNP-2145|669[0n]bp  
 Gorgythion begga pyralinaDHJ02|[2942]|98-SRNP-13474|669[0n]bp  
 Gorgythion begga pyralinaDHJ02|[2943]|06-SRNP-42907|669[0n]bp  
 Gorgythion begga pyralinaDHJ02|[2944]|06-SRNP-22800|669[0n]bp  
 Gorgythion begga pyralinaDHJ02|[2945]|04-SRNP-42567|669[0n]bp  
 Gorgythion begga pyralinaDHJ02|[2946]|04-SRNP-41839|669[0n]bp  
 Gorgythion begga pyralinaDHJ02|[2947]|06-SRNP-57189|669[0n]bp  
 Gorgythion begga pyralinaDHJ02|[2948]|06-SRNP-57188|669[0n]bp  
 Gorgythion begga pyralinaDHJ02|[2949]|97-SRNP-127|669[0n]bp  
 Gorgythion begga pyralinaDHJ02|[2950]|02-SRNP-14120|669[0n]bp  
 Gorgythion begga pyralinaDHJ02|[2951]|06-SRNP-30444|669[0n]bp  
 Gorgythion begga pyralinaDHJ02|[2952]|06-SRNP-30443|669[0n]bp  
 Gorgythion begga pyralinaDHJ02|[2953]|05-SRNP-65607|669[0n]bp  
 Gorgythion begga pyralinaDHJ02|[2954]|05-SRNP-66197|669[0n]bp  
 Gorgythion begga pyralinaDHJ02|[2955]|05-SRNP-30599|669[0n]bp  
 Gorgythion begga pyralinaDHJ02|[2956]|05-SRNP-2471|669[0n]bp  
 Gorgythion begga pyralinaDHJ02|[2957]|06-SRNP-22074|669[0n]bp  
 Gorgythion begga pyralinaDHJ02|[2958]|06-SRNP-65353|669[0n]bp  
 Gorgythion begga pyralinaDHJ02|[2959]|07-SRNP-42322|669[0n]bp  
 Gorgythion begga pyralinaDHJ02|[2960]|07-SRNP-42321|669[0n]bp  
 Gorgythion begga pyralinaDHJ02|[2961]|06-SRNP-30986|669[0n]bp  
 Gorgythion begga pyralinaDHJ02|[2962]|06-SRNP-31171|669[0n]bp  
 Gorgythion begga pyralinaDHJ02|[2963]|05-SRNP-33765|669[0n]bp  
 Gorgythion begga pyralinaDHJ02|[2964]|05-SRNP-33759|669[0n]bp  
 Gorgythion begga pyralinaDHJ02|[2965]|02-SRNP-5740|669[0n]bp  
 Gorgythion begga pyralinaDHJ02|[2966]|02-SRNP-5307|669[0n]bp  
 Gorgythion begga pyralinaDHJ02|[2967]|02-SRNP-5972|669[0n]bp  
 Gorgythion begga pyralinaDHJ02|[2968]|02-SRNP-4537|669[0n]bp  
 Gorgythion begga pyralinaDHJ02|[2969]|02-SRNP-5739|669[0n]bp  
 Gorgythion begga pyralinaDHJ02|[2970]|02-SRNP-33710|669[0n]bp  
 Gorgythion begga pyralinaDHJ02|[2971]|01-SRNP-9221|669[0n]bp  
 Gorgythion begga pyralinaDHJ02|[2972]|02-SRNP-2286|669[0n]bp  
 Gorgythion begga pyralinaDHJ02|[2973]|01-SRNP-1270|669[0n]bp  
 Gorgythion begga pyralinaDHJ02|[2974]|01-SRNP-17453|669[0n]bp  
 Gorgythion begga pyralinaDHJ02|[2975]|01-SRNP-15739|669[0n]bp  
 Gorgythion begga pyralinaDHJ02|[2976]|02-SRNP-27923|669[2n]bp  
 -Gorgythion begga pyralinaDHJ02|[2977]|04-SRNP-41616|669[0n]bp  
 -Gorgythion begga pyralinaDHJ02|[2978]|03-SRNP-21505|642[0n]bp  
 Gorgythion begga pyralinaDHJ02|[2979]|06-SRNP-23305|669[0n]bp  
 Gorgythion begga pyralinaDHJ02|[2980]|08-SRNP-65479|669[0n]bp  
 Gorgythion begga pyralinaDHJ02|[2981]|08-SRNP-4702|666[0n]bp  
 Gorgythion begga pyralinaDHJ02|[2982]|05-SRNP-66163|630[0n]bp  
 Gorgythion begga pyralinaDHJ02|[2983]|05-SRNP-40934|636[0n]bp  
 Gorgythion begga pyralinaDHJ02|[2984]|02-SRNP-15032|627[0n]bp  
 Gorgythion begga pyralinaDHJ02|[2985]|07-SRNP-31672|642[0n]bp  
 Gorgythion begga pyralinaDHJ02|[2986]|07-SRNP-65124|639[0n]bp  
 Gorgythion begga pyralinaDHJ02|[2987]|05-SRNP-33764|630[0n]bp  
 Gorgythion begga pyralinaDHJ02|[2988]|03-SRNP-28550|609[2n]bp  
 Gorgythion begga pyralinaDHJ02|[2989]|98-SRNP-4629|594[0n]bp  
 Gorgythion begga pyralinaDHJ02|[2990]|99-SRNP-2220|630[1n]bp  
 Gorgythion begga pyralinaDHJ02|[2991]|98-SRNP-4280|630[1n]bp  
 Gorgythion begga pyralinaDHJ02|[2992]|99-SRNP-2219|630[1n]bp  
 Gorgythion begga pyralinaDHJ02|[2993]|02-SRNP-14184|630[1n]bp  
 Gorgythion begga pyralinaDHJ02|[2994]|05-SRNP-41201|588[0n]bp  
 Gorgythion begga pyralinaDHJ02|[2995]|95-SRNP-7044|606[0n]bp  
 Gorgythion begga pyralinaDHJ02|[2996]|06-SRNP-40632|606[0n]bp  
 Gorgythion begga pyralinaDHJ02|[2997]|95-SRNP-6166|624[0n]bp  
 Gorgythion begga pyralinaDHJ02|[2998]|06-SRNP-30946|633[0n]bp  
 Gorgythion begga pyralinaDHJ02|[2999]|05-SRNP-40817|633[0n]bp  
 Gorgythion begga pyralinaDHJ02|[3000]|06-SRNP-4688|628[0n]bp

Gorgythion begga pyralinaDHJ02 [2997] 06-SRNP-30946 | 633 [0n]bp  
 Gorgythion begga pyralinaDHJ02 [2998] 06-SRNP-30946 | 633 [0n]bp  
 Gorgythion begga pyralinaDHJ02 [2999] 05-SRNP-40817 | 633 [0n]bp  
 Gorgythion begga pyralinaDHJ02 [3000] 96-SRNP-9689 | 639 [0n]bp  
 Gorgythion begga pyralinaDHJ02 [3001] 97-SRNP-5666 | 624 [0n]bp  
 Gorgythion begga pyralinaDHJ02 [3002] 99-SRNP-3525 | 624 [0n]bp  
 Gorgythion begga pyralinaDHJ02 [3003] 03-SRNP-21608 | 561 [0n]bp  
 Gorgythion begga pyralinaDHJ02 [3004] 02-SRNP-5088 | 576 [0n]bp  
 Gorgythion begga pyralinaDHJ02 [3005] 98-SRNP-4756 | 630 [1n]bp  
 Gorgythion begga pyralinaDHJ02 [3006] 04-SRNP-43161 | 573 [0n]bp  
 Gorgythion begga pyralinaDHJ02 [3007] 97-SRNP-380 | 603 [0n]bp  
 Gorgythion begga pyralinaDHJ02 [3008] 05-SRNP-32342 | 525 [0n]bp  
 Gorgythion begga pyralinaDHJ02 [3009] 97-SRNP-11537 | 609 [0n]bp  
 Gorgythion begga pyralinaDHJ02 [3010] 00-SRNP-2655 | 636 [0n]bp  
 Gorgythion begga pyralinaDHJ02 [3011] 08-SRNP-40397 | 633 [0n]bp  
 Gorgythion begga pyralinaDHJ02 [3012] 08-SRNP-40417 | 594 [0n]bp  
 Gorgythion begga pyralinaDHJ02 [3013] 93-SRNP-7034 | 558 [0n]bp  
 Gorgythion begga pyralinaDHJ02 [3014] 03-SRNP-20828 | 645 [0n]bp  
 Gorgythion begga pyralinaDHJ02 [3015] 05-SRNP-30971 | 687 [0n]bp  
 Gorgythion begga pyralinaDHJ02 [3016] 07-SRNP-23849 | 669 [0n]bp  
 Gorgythion begga pyralinaDHJ02 [3017] 06-SRNP-59585 | 669 [0n]bp  
 Gorgythion begga pyralinaDHJ02 [3018] 06-SRNP-59797 | 669 [0n]bp  
 Gorgythion begga pyralinaDHJ02 [3019] 06-SRNP-59614 | 669 [0n]bp  
 Gorgythion begga pyralinaDHJ02 [3020] 06-SRNP-43424 | 669 [0n]bp  
 Gorgythion begga pyralinaDHJ02 [3021] 06-SRNP-22111 | 669 [0n]bp  
 Gorgythion begga pyralinaDHJ02 [3022] 04-SRNP-30434 | 669 [0n]bp  
 Gorgythion begga pyralinaDHJ02 [3023] 04-SRNP-40895 | 669 [0n]bp  
 Gorgythion begga pyralinaDHJ02 [3024] 04-SRNP-35213 | 669 [0n]bp  
 Gorgythion begga pyralinaDHJ02 [3025] 04-SRNP-15268 | 669 [0n]bp  
 Gorgythion begga pyralinaDHJ02 [3026] 04-SRNP-33308 | 669 [0n]bp  
 Gorgythion begga pyralinaDHJ02 [3027] 00-SRNP-6011 | 669 [0n]bp  
 Gorgythion begga pyralinaDHJ02 [3028] 00-SRNP-2364 | 669 [0n]bp  
 Gorgythion begga pyralinaDHJ02 [3029] 97-SRNP-10376 | 669 [0n]bp  
 Gorgythion begga pyralinaDHJ02 [3030] 00-SRNP-2182 | 669 [0n]bp  
 Gorgythion begga pyralinaDHJ02 [3031] 00-SRNP-2038 | 669 [0n]bp  
 Gorgythion begga pyralinaDHJ02 [3032] 06-SRNP-41729 | 669 [0n]bp  
 Gorgythion begga pyralinaDHJ02 [3033] 06-SRNP-30448 | 669 [0n]bp  
 Gorgythion begga pyralinaDHJ02 [3034] 06-SRNP-30751 | 669 [0n]bp  
 Gorgythion begga pyralinaDHJ02 [3035] 06-SRNP-30445 | 669 [0n]bp  
 Gorgythion begga pyralinaDHJ02 [3036] 06-SRNP-30942 | 669 [0n]bp  
 Gorgythion begga pyralinaDHJ02 [3037] 05-SRNP-33753 | 669 [0n]bp  
 Gorgythion begga pyralinaDHJ02 [3038] 05-SRNP-33752 | 669 [0n]bp  
 Gorgythion begga pyralinaDHJ02 [3039] 05-SRNP-33272 | 669 [0n]bp  
 Gorgythion begga pyralinaDHJ02 [3040] 05-SRNP-30970 | 669 [0n]bp  
 Gorgythion begga pyralinaDHJ02 [3041] 05-SRNP-31860 | 669 [0n]bp  
 Gorgythion begga pyralinaDHJ02 [3042] 02-SRNP-21092 | 669 [0n]bp  
 Gorgythion begga pyralinaDHJ02 [3043] 02-SRNP-33944 | 669 [0n]bp  
 Gorgythion begga pyralinaDHJ02 [3044] 02-SRNP-19850 | 669 [0n]bp  
 Gorgythion begga pyralinaDHJ02 [3045] 02-SRNP-51071 | 669 [0n]bp  
 Gorgythion begga pyralinaDHJ02 [3046] 02-SRNP-27777 | 669 [0n]bp  
 Gorgythion begga pyralinaDHJ02 [3047] 07-SRNP-55244 | 666 [0n]bp  
 Gorgythion begga pyralinaDHJ02 [3048] 07-SRNP-55198 | 663 [0n]bp  
 Gorgythion begga pyralinaDHJ02 [3049] 05-SRNP-31861 | 630 [3n]bp  
 Gorgythion begga pyralinaDHJ02 [3050] 04-SRNP-43162 | 660 [0n]bp  
 Gorgythion begga pyralinaDHJ02 [3051] 05-SRNP-30226 | 660 [0n]bp  
 Gorgythion begga pyralinaDHJ02 [3052] 06-SRNP-57350 | 657 [0n]bp  
 Gorgythion begga pyralinaDHJ02 [3053] 05-SRNP-30688 | 618 [0n]bp  
 Gorgythion begga pyralinaDHJ02 [3054] 02-SRNP-14229 | 648 [0n]bp  
 Gorgythion begga pyralinaDHJ02 [3055] 02-SRNP-13839 | 642 [0n]bp  
 Gorgythion begga pyralinaDHJ02 [3056] 04-SRNP-56552 | 642 [0n]bp  
 Gorgythion begga pyralinaDHJ02 [3057] 07-SRNP-41296 | 645 [0n]bp  
 Gorgythion begga pyralinaDHJ02 [3058] 08-SRNP-40399 | 660 [0n]bp  
 Gorgythion begga pyralinaDHJ02 [3059] 08-SRNP-70432 | 669 [0n]bp  
 Gorgythion begga pyralinaDHJ02 [3060] 08-SRNP-1816 | 669 [0n]bp  
 Gorgythion begga pyralinaDHJ02 [3061] 08-SRNP-30607 | 669 [0n]bp  
 Gorgythion begga pyralinaDHJ02 [3062] 08-SRNP-20433 | 669 [0n]bp  
 Gorgythion begga pyralinaDHJ02 [3063] 08-SRNP-30605 | 669 [0n]bp  
 Gorgythion begga pyralinaDHJ02 [3064] 08-SRNP-30606 | 669 [0n]bp  
 Gorgythion begga pyralinaDHJ02 [3065] 08-SRNP-22577 | 669 [0n]bp  
 Gorgythion begga pyralinaDHJ02 [3066] 08-SRNP-24676 | 669 [0n]bp  
 Gorgythion begga pyralinaDHJ02 [3067] 09-SRNP-72858 | 669 [0n]bp  
 Gorgythion begga pyralinaDHJ02 [3068] 06-SRNP-60373 | 669 [0n]bp  
 Gorgythion begga pyralinaDHJ02 [3069] 04-SRNP-42979 | 669 [0n]bp  
 Gorgythion begga pyralinaDHJ02 [3070] 05-SRNP-66115 | 669 [0n]bp  
 Gorgythion begga pyralinaDHJ02 [3071] 05-SRNP-41039 | 669 [0n]bp  
 Gorgythion begga pyralinaDHJ02 [3072] 03-SRNP-21087 | 645 [0n]bp  
 Gorgythion begga pyralinaDHJ02 [3073] 06-SRNP-30446 | 666 [0n]bp  
 Gorgythion begga pyralinaDHJ02 [3074] 04-SRNP-60168 | 666 [0n]bp  
 Gorgythion begga pyralinaDHJ02 [3075] 05-SRNP-20969 | 669 [0n]bp  
 Gorgythion begga pyralinaDHJ02 [3076] 08-SRNP-65113 | 669 [0n]bp  
 Gorgythion begga pyralinaDHJ02 [3077] 09-SRNP-66079 | 669 [0n]bp

Telemiades fides [3078] 07-SRNP-16611 | 321 [0n]bp  
 Telemiades fides [3079] 05-SRNP-55775 | 669 [0n]bp  
 Telemiades fides [3080] 08-SRNP-65257 | 669 [0n]bp  
 Telemiades fides [3081] 02-SRNP-14055 | 669 [0n]bp  
 Telemiades fides [3082] 07-SRNP-23507 | 669 [0n]bp  
 Telemiades fides [3083] 05-SRNP-13191 | 636 [1n]bp  
 Telemiades fides [3084] 07-SRNP-65513 | 642 [0n]bp  
 Telemiades fides [3085] 07-SRNP-61381 | 642 [0n]bp  
 Telemiades fides [3086] 07-SRNP-60109 | 642 [0n]bp  
 Telemiades fides [3087] 07-SRNP-21983 | 642 [0n]bp  
 Telemiades fides [3088] 07-SRNP-65137 | 642 [0n]bp  
 Telemiades fides [3089] 07-SRNP-31688 | 642 [0n]bp  
 Telemiades fides [3090] 07-SRNP-31687 | 642 [0n]bp  
 Telemiades fides [3091] 07-SRNP-21628 | 642 [0n]bp  
 Telemiades fides [3092] 07-SRNP-20486 | 642 [0n]bp  
 Telemiades fides [3093] 07-SRNP-21257 | 642 [0n]bp  
 Telemiades fides [3094] 06-SRNP-60265 | 642 [0n]bp  
 Telemiades fides [3095] 02-SRNP-3677 | 669 [1n]bp  
 Telemiades fides [3096] 07-SRNP-5104 | 636 [0n]bp  
 Telemiades fides [3097] 07-SRNP-31870 | 648 [0n]bp  
 Telemiades fides [3098] 07-SRNP-65687 | 645 [0n]bp  
 Telemiades fides [3099] 03-SRNP-1234 | 645 [0n]bp



|                  |        |               |           |
|------------------|--------|---------------|-----------|
| Telemiades fides | [3097] | 07-SRNP-31870 | 640[0n]bp |
| Telemiades fides | [3098] | 07-SRNP-65687 | 645[0n]bp |
| Telemiades fides | [3099] | 03-SRNP-1234  | 645[0n]bp |
| Telemiades fides | [3100] | 02-SRNP-4033  | 654[0n]bp |
| Telemiades fides | [3101] | 07-SRNP-3685  | 630[0n]bp |
| Telemiades fides | [3102] | 02-SRNP-17931 | 627[2n]bp |
| Telemiades fides | [3103] | 07-SRNP-31873 | 627[0n]bp |
| Telemiades fides | [3104] | 08-SRNP-45092 | 669[1n]bp |
| Telemiades fides | [3105] | 08-SRNP-24174 | 627[0n]bp |
| Telemiades fides | [3106] | 05-SRNP-55645 | 669[0n]bp |
| Telemiades fides | [3107] | 07-SRNP-3734  | 669[0n]bp |
| Telemiades fides | [3108] | 07-SRNP-3520  | 642[0n]bp |
| Telemiades fides | [3109] | 05-SRNP-55619 | 669[0n]bp |
| Telemiades fides | [3110] | 07-SRNP-32190 | 654[0n]bp |
| Telemiades fides | [3111] | 02-SRNP-10030 | 666[1n]bp |
| Telemiades fides | [3112] | 07-SRNP-31486 | 552[0n]bp |
| Telemiades fides | [3113] | 05-SRNP-13188 | 687[0n]bp |
| Telemiades fides | [3114] | 07-SRNP-55335 | 669[0n]bp |
| Telemiades fides | [3115] | 07-SRNP-55240 | 669[0n]bp |
| Telemiades fides | [3116] | 07-SRNP-55110 | 669[0n]bp |
| Telemiades fides | [3117] | 07-SRNP-1307  | 669[0n]bp |
| Telemiades fides | [3118] | 07-SRNP-55464 | 669[0n]bp |
| Telemiades fides | [3119] | 07-SRNP-55163 | 669[0n]bp |
| Telemiades fides | [3120] | 07-SRNP-1762  | 669[0n]bp |
| Telemiades fides | [3121] | 07-SRNP-21361 | 669[0n]bp |
| Telemiades fides | [3122] | 07-SRNP-21318 | 669[0n]bp |
| Telemiades fides | [3123] | 07-SRNP-21194 | 669[0n]bp |
| Telemiades fides | [3124] | 07-SRNP-20999 | 669[0n]bp |
| Telemiades fides | [3125] | 07-SRNP-21302 | 669[0n]bp |
| Telemiades fides | [3126] | 07-SRNP-21275 | 669[0n]bp |
| Telemiades fides | [3127] | 07-SRNP-21243 | 669[0n]bp |
| Telemiades fides | [3128] | 07-SRNP-21453 | 669[0n]bp |
| Telemiades fides | [3129] | 07-SRNP-65185 | 669[0n]bp |
| Telemiades fides | [3130] | 07-SRNP-20827 | 669[0n]bp |
| Telemiades fides | [3131] | 07-SRNP-31658 | 669[0n]bp |
| Telemiades fides | [3132] | 07-SRNP-30815 | 669[0n]bp |
| Telemiades fides | [3133] | 07-SRNP-57095 | 669[0n]bp |
| Telemiades fides | [3134] | 07-SRNP-2224  | 669[0n]bp |
| Telemiades fides | [3135] | 07-SRNP-56685 | 669[0n]bp |
| Telemiades fides | [3136] | 07-SRNP-31298 | 669[0n]bp |
| Telemiades fides | [3137] | 07-SRNP-3731  | 669[0n]bp |
| Telemiades fides | [3138] | 07-SRNP-3500  | 669[0n]bp |
| Telemiades fides | [3139] | 07-SRNP-3567  | 669[0n]bp |
| Telemiades fides | [3140] | 07-SRNP-3838  | 669[0n]bp |
| Telemiades fides | [3141] | 07-SRNP-65761 | 669[0n]bp |
| Telemiades fides | [3142] | 07-SRNP-4407  | 669[0n]bp |
| Telemiades fides | [3143] | 07-SRNP-4674  | 669[0n]bp |
| Telemiades fides | [3144] | 07-SRNP-59719 | 669[0n]bp |
| Telemiades fides | [3145] | 07-SRNP-65688 | 669[0n]bp |
| Telemiades fides | [3146] | 07-SRNP-65514 | 669[0n]bp |
| Telemiades fides | [3147] | 07-SRNP-65511 | 669[0n]bp |
| Telemiades fides | [3148] | 07-SRNP-65572 | 669[0n]bp |
| Telemiades fides | [3149] | 07-SRNP-59610 | 669[0n]bp |
| Telemiades fides | [3150] | 07-SRNP-20495 | 669[0n]bp |
| Telemiades fides | [3151] | 07-SRNP-3892  | 669[0n]bp |
| Telemiades fides | [3152] | 07-SRNP-4701  | 669[0n]bp |
| Telemiades fides | [3153] | 07-SRNP-4102  | 669[0n]bp |
| Telemiades fides | [3154] | 07-SRNP-33424 | 669[0n]bp |
| Telemiades fides | [3155] | 07-SRNP-3891  | 669[0n]bp |
| Telemiades fides | [3156] | 07-SRNP-3839  | 669[0n]bp |
| Telemiades fides | [3157] | 07-SRNP-3983  | 669[0n]bp |
| Telemiades fides | [3158] | 07-SRNP-4100  | 669[0n]bp |
| Telemiades fides | [3159] | 07-SRNP-65718 | 669[0n]bp |
| Telemiades fides | [3160] | 07-SRNP-5003  | 669[0n]bp |
| Telemiades fides | [3161] | 07-SRNP-5103  | 669[0n]bp |
| Telemiades fides | [3162] | 07-SRNP-5105  | 669[0n]bp |
| Telemiades fides | [3163] | 07-SRNP-5174  | 669[0n]bp |
| Telemiades fides | [3164] | 08-SRNP-551   | 669[0n]bp |
| Telemiades fides | [3165] | 07-SRNP-5111  | 669[0n]bp |
| Telemiades fides | [3166] | 07-SRNP-5168  | 669[0n]bp |
| Telemiades fides | [3167] | 07-SRNP-3984  | 669[0n]bp |
| Telemiades fides | [3168] | 07-SRNP-42715 | 669[0n]bp |
| Telemiades fides | [3169] | 07-SRNP-4405  | 669[0n]bp |
| Telemiades fides | [3170] | 07-SRNP-3835  | 669[0n]bp |
| Telemiades fides | [3171] | 07-SRNP-4291  | 669[0n]bp |
| Telemiades fides | [3172] | 07-SRNP-5162  | 669[0n]bp |
| Telemiades fides | [3173] | 07-SRNP-4770  | 669[0n]bp |
| Telemiades fides | [3174] | 08-SRNP-129   | 669[0n]bp |
| Telemiades fides | [3175] | 07-SRNP-5139  | 669[0n]bp |
| Telemiades fides | [3176] | 07-SRNP-46433 | 669[0n]bp |
| Telemiades fides | [3177] | 07-SRNP-4902  | 669[0n]bp |
| Telemiades fides | [3178] | 08-SRNP-1791  | 669[0n]bp |
| Telemiades fides | [3179] | 08-SRNP-20925 | 669[0n]bp |
| Telemiades fides | [3180] | 08-SRNP-20965 | 669[0n]bp |
| Telemiades fides | [3181] | 08-SRNP-21076 | 669[0n]bp |
| Telemiades fides | [3182] | 08-SRNP-21078 | 669[0n]bp |
| Telemiades fides | [3183] | 08-SRNP-20956 | 669[0n]bp |
| Telemiades fides | [3184] | 08-SRNP-21028 | 669[0n]bp |
| Telemiades fides | [3185] | 08-SRNP-21036 | 669[0n]bp |
| Telemiades fides | [3186] | 08-SRNP-21077 | 669[0n]bp |
| Telemiades fides | [3187] | 08-SRNP-21084 | 669[0n]bp |
| Telemiades fides | [3188] | 08-SRNP-20967 | 669[0n]bp |
| Telemiades fides | [3189] | 08-SRNP-21070 | 669[0n]bp |
| Telemiades fides | [3190] | 08-SRNP-20494 | 669[0n]bp |
| Telemiades fides | [3191] | 08-SRNP-65208 | 669[0n]bp |
| Telemiades fides | [3192] | 08-SRNP-20966 | 669[0n]bp |
| Telemiades fides | [3193] | 08-SRNP-21083 | 669[0n]bp |
| Telemiades fides | [3194] | 08-SRNP-971   | 669[0n]bp |
| Telemiades fides | [3195] | 08-SRNP-2340  | 669[0n]bp |
| Telemiades fides | [3196] | 08-SRNP-65455 | 669[0n]bp |
| Telemiades fides | [3197] | 08-SRNP-45069 | 669[0n]bp |
| Telemiades fides | [3198] | 07-SRNP-24562 | 669[0n]bp |
| Telemiades fides | [3199] | 08-SRNP-45067 | 669[0n]bp |

|                  |      |               |           |
|------------------|------|---------------|-----------|
| Telemiades fides | 3197 | 08-SRNP-45069 | 669[0n]bp |
| Telemiades fides | 3198 | 07-SRNP-24562 | 669[0n]bp |
| Telemiades fides | 3199 | 08-SRNP-45067 | 669[0n]bp |
| Telemiades fides | 3200 | 08-SRNP-55478 | 669[0n]bp |
| Telemiades fides | 3201 | 08-SRNP-45144 | 669[0n]bp |
| Telemiades fides | 3202 | 08-SRNP-2342  | 669[0n]bp |
| Telemiades fides | 3203 | 07-SRNP-61016 | 669[0n]bp |
| Telemiades fides | 3204 | 08-SRNP-1790  | 669[0n]bp |
| Telemiades fides | 3205 | 08-SRNP-65277 | 669[0n]bp |
| Telemiades fides | 3206 | 08-SRNP-45161 | 669[0n]bp |
| Telemiades fides | 3207 | 07-SRNP-61357 | 669[0n]bp |
| Telemiades fides | 3208 | 08-SRNP-21071 | 669[0n]bp |
| Telemiades fides | 3209 | 08-SRNP-45065 | 669[0n]bp |
| Telemiades fides | 3210 | 08-SRNP-65278 | 669[0n]bp |
| Telemiades fides | 3211 | 08-SRNP-65292 | 669[0n]bp |
| Telemiades fides | 3212 | 08-SRNP-65279 | 669[0n]bp |
| Telemiades fides | 3213 | 08-SRNP-45093 | 669[0n]bp |
| Telemiades fides | 3214 | 08-SRNP-45143 | 669[0n]bp |
| Telemiades fides | 3215 | 07-SRNP-61184 | 669[0n]bp |
| Telemiades fides | 3216 | 08-SRNP-21378 | 669[0n]bp |
| Telemiades fides | 3217 | 08-SRNP-2123  | 669[0n]bp |
| Telemiades fides | 3218 | 08-SRNP-40973 | 669[0n]bp |
| Telemiades fides | 3219 | 08-SRNP-55982 | 669[0n]bp |
| Telemiades fides | 3220 | 08-SRNP-2424  | 669[0n]bp |
| Telemiades fides | 3221 | 08-SRNP-1346  | 669[0n]bp |
| Telemiades fides | 3222 | 07-SRNP-61358 | 669[0n]bp |
| Telemiades fides | 3223 | 08-SRNP-2357  | 669[0n]bp |
| Telemiades fides | 3224 | 07-SRNP-60943 | 669[0n]bp |
| Telemiades fides | 3225 | 08-SRNP-55069 | 669[0n]bp |
| Telemiades fides | 3226 | 08-SRNP-55417 | 669[0n]bp |
| Telemiades fides | 3227 | 08-SRNP-65209 | 669[0n]bp |
| Telemiades fides | 3228 | 08-SRNP-65076 | 669[0n]bp |
| Telemiades fides | 3229 | 08-SRNP-2338  | 669[0n]bp |
| Telemiades fides | 3230 | 08-SRNP-2339  | 669[0n]bp |
| Telemiades fides | 3231 | 08-SRNP-65207 | 669[0n]bp |
| Telemiades fides | 3232 | 08-SRNP-700   | 669[0n]bp |
| Telemiades fides | 3233 | 08-SRNP-65456 | 669[0n]bp |
| Telemiades fides | 3234 | 08-SRNP-55442 | 669[0n]bp |
| Telemiades fides | 3235 | 08-SRNP-1136  | 669[0n]bp |
| Telemiades fides | 3236 | 08-SRNP-65115 | 669[0n]bp |
| Telemiades fides | 3237 | 08-SRNP-55513 | 669[0n]bp |
| Telemiades fides | 3238 | 02-SRNP-31483 | 669[0n]bp |
| Telemiades fides | 3239 | 02-SRNP-33670 | 669[0n]bp |
| Telemiades fides | 3240 | 02-SRNP-34173 | 669[0n]bp |
| Telemiades fides | 3241 | 02-SRNP-5432  | 669[0n]bp |
| Telemiades fides | 3242 | 02-SRNP-5434  | 669[0n]bp |
| Telemiades fides | 3243 | 02-SRNP-31828 | 669[0n]bp |
| Telemiades fides | 3244 | 02-SRNP-5700  | 669[0n]bp |
| Telemiades fides | 3245 | 02-SRNP-27163 | 669[0n]bp |
| Telemiades fides | 3246 | 02-SRNP-14146 | 669[0n]bp |
| Telemiades fides | 3247 | 02-SRNP-5436  | 669[0n]bp |
| Telemiades fides | 3248 | 02-SRNP-19106 | 669[0n]bp |
| Telemiades fides | 3249 | 02-SRNP-18972 | 669[0n]bp |
| Telemiades fides | 3250 | 02-SRNP-2328  | 669[0n]bp |
| Telemiades fides | 3251 | 02-SRNP-2456  | 669[0n]bp |
| Telemiades fides | 3252 | 03-SRNP-5752  | 669[0n]bp |
| Telemiades fides | 3253 | 03-SRNP-5014  | 669[0n]bp |
| Telemiades fides | 3254 | 03-SRNP-31075 | 669[0n]bp |
| Telemiades fides | 3255 | 02-SRNP-20490 | 669[0n]bp |
| Telemiades fides | 3256 | 02-SRNP-18846 | 669[1n]bp |
| Telemiades fides | 3257 | 07-SRNP-4623  | 663[0n]bp |
| Telemiades fides | 3258 | 07-SRNP-4756  | 663[0n]bp |
| Telemiades fides | 3259 | 07-SRNP-429   | 669[2n]bp |
| Telemiades fides | 3260 | 07-SRNP-20828 | 618[0n]bp |
| Telemiades fides | 3261 | 08-SRNP-20412 | 621[0n]bp |
| Telemiades fides | 3262 | 05-SRNP-45213 | 669[0n]bp |
| Telemiades fides | 3263 | 07-SRNP-3837  | 657[0n]bp |
| Telemiades fides | 3264 | 07-SRNP-33828 | 621[0n]bp |
| Telemiades fides | 3265 | 07-SRNP-3730  | 615[0n]bp |
| Telemiades fides | 3266 | 05-SRNP-55621 | 669[0n]bp |
| Telemiades fides | 3267 | 96-SRNP-992   | 594[0n]bp |
| Telemiades fides | 3268 | 00-SRNP-20860 | 606[0n]bp |
| Telemiades fides | 3269 | 92-SRNP-6139  | 582[0n]bp |
| Telemiades fides | 3270 | 02-SRNP-31421 | 651[0n]bp |
| Telemiades fides | 3271 | 92-SRNP-5681  | 603[0n]bp |
| Telemiades fides | 3272 | 03-SRNP-12110 | 618[0n]bp |
| Telemiades fides | 3273 | 06-SRNP-12339 | 633[0n]bp |
| Telemiades fides | 3274 | 07-SRNP-1494  | 594[0n]bp |
| Telemiades fides | 3275 | 07-SRNP-4234  | 606[0n]bp |
| Telemiades fides | 3276 | 07-SRNP-60566 | 606[0n]bp |
| Telemiades fides | 3277 | 07-SRNP-30817 | 528[5n]bp |
| Telemiades fides | 3278 | 08-SRNP-20211 | 633[0n]bp |
| Telemiades fides | 3279 | 07-SRNP-42397 | 660[0n]bp |
| Telemiades fides | 3280 | 07-SRNP-3474  | 660[0n]bp |
| Telemiades fides | 3281 | 07-SRNP-4408  | 657[0n]bp |
| Telemiades fides | 3282 | 08-SRNP-65408 | 621[0n]bp |
| Telemiades fides | 3283 | 07-SRNP-4099  | 621[0n]bp |
| Telemiades fides | 3284 | 07-SRNP-3733  | 645[0n]bp |
| Telemiades fides | 3285 | 07-SRNP-5157  | 669[0n]bp |
| Telemiades fides | 3286 | 07-SRNP-4492  | 669[0n]bp |
| Telemiades fides | 3287 | 07-SRNP-24713 | 621[0n]bp |
| Telemiades fides | 3288 | 08-SRNP-65206 | 669[0n]bp |
| Telemiades fides | 3289 | 08-SRNP-55064 | 669[0n]bp |
| Telemiades fides | 3290 | 08-SRNP-55444 | 669[0n]bp |
| Telemiades fides | 3291 | 07-SRNP-60770 | 669[0n]bp |
| Telemiades fides | 3292 | 08-SRNP-65185 | 669[0n]bp |
| Telemiades fides | 3293 | 08-SRNP-2343  | 669[0n]bp |
| Telemiades fides | 3294 | 07-SRNP-15871 | 669[0n]bp |
| Telemiades fides | 3295 | 07-SRNP-16610 | 669[0n]bp |
| Telemiades fides | 3296 | 08-SRNP-20930 | 669[0n]bp |
| Telemiades fides | 3297 | 07-SRNP-31883 | 669[0n]bp |
| Telemiades fides | 3298 | 07-SRNP-15746 | 669[0n]bp |
| Telemiades fides | 3299 | 07-SRNP-16467 | 669[0n]bp |

|                              |        |               |           |
|------------------------------|--------|---------------|-----------|
| Telemiades fides             | [3297] | 07-SRNP-31883 | 669[0n]bp |
| Telemiades fides             | [3298] | 07-SRNP-15746 | 669[0n]bp |
| Telemiades fides             | [3299] | 07-SRNP-16467 | 669[0n]bp |
| Telemiades fides             | [3300] | 08-SRNP-5844  | 669[0n]bp |
| Telemiades fides             | [3301] | 08-SRNP-5513  | 669[0n]bp |
| Telemiades fides             | [3302] | 07-SRNP-30816 | 669[0n]bp |
| Telemiades fides             | [3303] | 07-SRNP-16643 | 669[0n]bp |
| Telemiades fides             | [3304] | 07-SRNP-16048 | 669[0n]bp |
| Telemiades fides             | [3305] | 07-SRNP-16680 | 669[0n]bp |
| Telemiades fides             | [3306] | 08-SRNP-66070 | 669[0n]bp |
| Telemiades fides             | [3307] | 08-SRNP-23199 | 669[0n]bp |
| Telemiades fides             | [3308] | 07-SRNP-20485 | 669[0n]bp |
| Telemiades fides             | [3309] | 07-SRNP-20483 | 669[0n]bp |
| Telemiades fides             | [3310] | 06-SRNP-23268 | 669[0n]bp |
| Telemiades fides             | [3311] | 06-SRNP-67814 | 669[0n]bp |
| Telemiades fides             | [3312] | 07-SRNP-55749 | 669[0n]bp |
| Telemiades fides             | [3313] | 06-SRNP-22405 | 669[0n]bp |
| Telemiades fides             | [3314] | 02-SRNP-14139 | 669[0n]bp |
| Telemiades fides             | [3315] | 02-SRNP-5368  | 669[0n]bp |
| Telemiades fides             | [3316] | 02-SRNP-10004 | 669[0n]bp |
| Telemiades fides             | [3317] | 02-SRNP-10052 | 669[0n]bp |
| Telemiades fides             | [3318] | 02-SRNP-13773 | 669[0n]bp |
| Telemiades fides             | [3319] | 01-SRNP-9333  | 669[0n]bp |
| Telemiades fides             | [3320] | 05-SRNP-55777 | 669[0n]bp |
| Telemiades fides             | [3321] | 04-SRNP-36226 | 669[0n]bp |
| Telemiades fides             | [3322] | 05-SRNP-2772  | 669[0n]bp |
| Telemiades fides             | [3323] | 05-SRNP-1858  | 669[0n]bp |
| Telemiades fides             | [3324] | 05-SRNP-32225 | 669[0n]bp |
| Telemiades fides             | [3325] | 05-SRNP-13190 | 669[0n]bp |
| Telemiades fides             | [3326] | 05-SRNP-55784 | 669[0n]bp |
| Telemiades fides             | [3327] | 05-SRNP-55783 | 669[0n]bp |
| Telemiades fides             | [3328] | 05-SRNP-1265  | 669[0n]bp |
| Telemiades fides             | [3329] | 05-SRNP-55774 | 669[0n]bp |
| Telemiades fides             | [3330] | 06-SRNP-12677 | 669[0n]bp |
| Telemiades fides             | [3331] | 06-SRNP-12708 | 669[0n]bp |
| Telemiades fides             | [3332] | 06-SRNP-60264 | 669[0n]bp |
| Telemiades fides             | [3333] | 06-SRNP-60266 | 669[0n]bp |
| Telemiades fides             | [3334] | 02-SRNP-1254  | 669[0n]bp |
| Telemiades fides             | [3335] | 02-SRNP-2194  | 669[0n]bp |
| Telemiades fides             | [3336] | 09-SRNP-65293 | 669[0n]bp |
| Telemiades fides             | [3337] | 09-SRNP-65344 | 669[0n]bp |
| Telemiades fides             | [3338] | 09-SRNP-44485 | 669[0n]bp |
| Telemiades fides             | [3339] | 09-SRNP-66013 | 669[0n]bp |
| Telemiades Burns02           | [3340] | 05-SRNP-40200 | 669[0n]bp |
| Telemiades Burns02           | [3341] | 05-SRNP-2164  | 669[0n]bp |
| Telemiades Burns02           | [3342] | 05-SRNP-33036 | 669[0n]bp |
| Telemiades Burns02           | [3343] | 05-SRNP-43775 | 669[0n]bp |
| Telemiades Burns02           | [3344] | 07-SRNP-3595  | 669[0n]bp |
| Telemiades gallius           | [3345] | 00-SRNP-4456  | 639[0n]bp |
| Telemiades gallius           | [3346] | 99-SRNP-13875 | 576[0n]bp |
| Telemiades chrysorrhoeaDHJ01 | [3347] | 03-SRNP-3888  | 540[0n]bp |
| Telemiades chrysorrhoeaDHJ01 | [3348] | 02-SRNP-23372 | 570[0n]bp |
| Telemiades chrysorrhoeaDHJ01 | [3349] | 02-SRNP-23231 | 669[3n]bp |
| Telemiades chrysorrhoeaDHJ01 | [3350] | 04-SRNP-35467 | 510[1n]bp |
| Telemiades chrysorrhoeaDHJ01 | [3351] | 03-SRNP-4126  | 621[0n]bp |
| Telemiades chrysorrhoeaDHJ01 | [3352] | 03-SRNP-4445  | 621[0n]bp |
| Telemiades chrysorrhoeaDHJ01 | [3353] | 03-SRNP-3666  | 621[0n]bp |
| Telemiades chrysorrhoeaDHJ01 | [3354] | 03-SRNP-4745  | 621[0n]bp |
| Telemiades chrysorrhoeaDHJ01 | [3355] | 03-SRNP-4261  | 621[0n]bp |
| Telemiades chrysorrhoeaDHJ01 | [3356] | 02-SRNP-9407  | 621[0n]bp |
| Telemiades chrysorrhoeaDHJ01 | [3357] | 02-SRNP-9730  | 621[0n]bp |
| Telemiades chrysorrhoeaDHJ01 | [3358] | 02-SRNP-9405  | 621[0n]bp |
| Telemiades chrysorrhoeaDHJ01 | [3359] | 02-SRNP-9230  | 621[0n]bp |
| Telemiades chrysorrhoeaDHJ01 | [3360] | 07-SRNP-36106 | 642[0n]bp |
| Telemiades chrysorrhoeaDHJ01 | [3361] | 00-SRNP-9621  | 669[1n]bp |
| Telemiades chrysorrhoeaDHJ01 | [3362] | 00-SRNP-9804  | 669[0n]bp |
| Telemiades chrysorrhoeaDHJ01 | [3363] | 01-SRNP-6022  | 669[0n]bp |
| Telemiades chrysorrhoeaDHJ01 | [3364] | 02-SRNP-8012  | 669[0n]bp |
| Telemiades chrysorrhoeaDHJ01 | [3365] | 01-SRNP-6829  | 669[0n]bp |
| Telemiades chrysorrhoeaDHJ01 | [3366] | 03-SRNP-4023  | 669[0n]bp |
| Telemiades chrysorrhoeaDHJ01 | [3367] | 03-SRNP-4298  | 669[0n]bp |
| Telemiades chrysorrhoeaDHJ01 | [3368] | 03-SRNP-4631  | 669[0n]bp |
| Telemiades chrysorrhoeaDHJ01 | [3369] | 01-SRNP-6010  | 669[0n]bp |
| Telemiades chrysorrhoeaDHJ01 | [3370] | 03-SRNP-4020  | 585[1n]bp |
| Telemiades chrysorrhoeaDHJ01 | [3371] | 03-SRNP-4299  | 669[0n]bp |
| Telemiades chrysorrhoeaDHJ01 | [3372] | 02-SRNP-23178 | 600[0n]bp |
| Telemiades chrysorrhoeaDHJ01 | [3373] | 02-SRNP-23351 | 600[1n]bp |
| Telemiades chrysorrhoeaDHJ01 | [3374] | 02-SRNP-23358 | 621[0n]bp |
| Telemiades chrysorrhoeaDHJ01 | [3375] | 02-SRNP-23070 | 585[0n]bp |
| Telemiades chrysorrhoeaDHJ01 | [3376] | 03-SRNP-4448  | 585[0n]bp |
| Telemiades chrysorrhoeaDHJ01 | [3377] | 02-SRNP-9520  | 585[0n]bp |
| Telemiades chrysorrhoeaDHJ01 | [3378] | 03-SRNP-4025  | 585[0n]bp |
| Telemiades chrysorrhoeaDHJ01 | [3379] | 02-SRNP-9560  | 585[0n]bp |
| Telemiades chrysorrhoeaDHJ01 | [3380] | 02-SRNP-9227  | 585[0n]bp |
| Telemiades chrysorrhoeaDHJ01 | [3381] | 02-SRNP-8011  | 354[0n]bp |
| Telemiades chrysorrhoeaDHJ01 | [3382] | 03-SRNP-4743  | 357[0n]bp |
| Telemiades chrysorrhoeaDHJ01 | [3383] | 01-SRNP-6170  | 609[0n]bp |
| Telemiades chrysorrhoeaDHJ01 | [3384] | 04-SRNP-35573 | 669[0n]bp |
| Telemiades chrysorrhoeaDHJ01 | [3385] | 08-SRNP-35603 | 669[0n]bp |
| Telemiades chrysorrhoeaDHJ01 | [3386] | 08-SRNP-35580 | 669[0n]bp |
| Telemiades chrysorrhoeaDHJ01 | [3387] | 08-SRNP-35605 | 669[0n]bp |
| Telemiades chrysorrhoeaDHJ02 | [3388] | 03-SRNP-4636  | 612[5n]bp |
| Telemiades chrysorrhoeaDHJ02 | [3389] | 03-SRNP-4892  | 612[8n]bp |
| Telemiades chrysorrhoeaDHJ02 | [3390] | 08-SRNP-35601 | 669[1n]bp |
| Telemiades chrysorrhoeaDHJ02 | [3391] | 02-SRNP-8074  | 588[8n]bp |
| Telemiades chrysorrhoeaDHJ02 | [3392] | 03-SRNP-4837  | 612[6n]bp |
| Telemiades chrysorrhoeaDHJ02 | [3393] | 02-SRNP-23202 | 675[6n]bp |
| Telemiades chrysorrhoeaDHJ02 | [3394] | 08-SRNP-35613 | 669[0n]bp |
| Telemiades chrysorrhoeaDHJ02 | [3395] | 08-SRNP-35384 | 669[0n]bp |
| Telemiades chrysorrhoeaDHJ02 | [3396] | 08-SRNP-35968 | 669[0n]bp |
| Telemiades chrysorrhoeaDHJ02 | [3397] | 08-SRNP-35614 | 669[0n]bp |
| Telemiades chrysorrhoeaDHJ02 | [3398] | 08-SRNP-35579 | 669[0n]bp |
| Telemiades chrysorrhoeaDHJ02 | [3399] | 08-SRNP-35966 | 669[0n]bp |

```

Telemiades chrysorrhoeaDHJ02|[3397]|08-SRNP-35614|669[0n]bp
Telemiades chrysorrhoeaDHJ02|[3398]|08-SRNP-35579|669[0n]bp
Telemiades chrysorrhoeaDHJ02|[3399]|08-SRNP-35966|669[0n]bp
Telemiades chrysorrhoeaDHJ02|[3400]|03-SRNP-4632|612[1n]bp
Telemiades chrysorrhoeaDHJ02|[3401]|03-SRNP-4447|576[5n]bp
Telemiades chrysorrhoeaDHJ02|[3402]|02-SRNP-9408|609[1n]bp
Telemiades chrysorrhoeaDHJ02|[3403]|02-SRNP-9930|615[1n]bp
Telemiades chrysorrhoeaDHJ02|[3404]|03-SRNP-4026|633[3n]bp
Telemiades chrysorrhoeaDHJ02|[3405]|03-SRNP-4297|585[5n]bp
Telemiades chrysorrhoeaDHJ02|[3406]|03-SRNP-4742|675[2n]bp
Telemiades chrysorrhoeaDHJ02|[3407]|03-SRNP-3440|630[2n]bp
Telemiades chrysorrhoeaDHJ02|[3408]|03-SRNP-3441|645[1n]bp
Telemiades chrysorrhoeaDHJ02|[3409]|02-SRNP-23096|645[1n]bp
Telemiades chrysorrhoeaDHJ02|[3410]|02-SRNP-23179|639[1n]bp
Telemiades chrysorrhoeaDHJ02|[3411]|00-SRNP-9561|675[0n]bp
Telemiades chrysorrhoeaDHJ02|[3412]|01-SRNP-6918|675[2n]bp
Telemiades chrysorrhoeaDHJ02|[3413]|02-SRNP-9664|675[1n]bp
Telemiades chrysorrhoeaDHJ02|[3414]|01-SRNP-6864|675[3n]bp
Telemiades chrysorrhoeaDHJ02|[3415]|02-SRNP-9445|588[1n]bp
Telemiades chrysorrhoeaDHJ02|[3416]|02-SRNP-9929|588[0n]bp
Telemiades chrysorrhoeaDHJ02|[3417]|02-SRNP-23273|588[0n]bp
Telemiades chrysorrhoeaDHJ02|[3418]|02-SRNP-23201|618[0n]bp
Telemiades chrysorrhoeaDHJ02|[3419]|08-SRNP-37068|642[5n]bp
Telemiades megallus|[3420]|08-SRNP-66068|669[0n]bp
Telemiades megallus|[3421]|08-SRNP-40055|654[0n]bp
Telemiades megallus|[3422]|07-SRNP-42824|645[0n]bp
Telemiades megallus|[3423]|03-SRNP-31164|492[0n]bp
Telemiades megallus|[3424]|07-SRNP-3719|669[0n]bp
Telemiades megallus|[3425]|08-SRNP-40056|651[0n]bp
Telemiades megallus|[3426]|07-SRNP-42778|642[0n]bp
Telemiades megallus|[3427]|07-SRNP-42752|642[0n]bp
Telemiades megallus|[3428]|07-SRNP-33307|642[0n]bp
Telemiades megallus|[3429]|07-SRNP-24437|621[0n]bp
Telemiades megallus|[3430]|07-SRNP-43135|645[2n]bp
Telemiades megallus|[3431]|07-SRNP-43082|669[0n]bp
Telemiades megallus|[3432]|09-SRNP-69855|669[0n]bp
Telemiades megallus|[3433]|07-SRNP-42971|669[0n]bp
Telemiades megallus|[3434]|07-SRNP-42910|669[0n]bp
Telemiades megallus|[3435]|07-SRNP-3809|669[0n]bp
Telemiades megallus|[3436]|07-SRNP-42969|669[0n]bp
Telemiades megallus|[3437]|07-SRNP-33308|669[0n]bp
Telemiades megallus|[3438]|07-SRNP-41026|669[0n]bp
Telemiades megallus|[3439]|07-SRNP-30422|669[0n]bp
Telemiades megallus|[3440]|05-SRNP-24526|669[0n]bp
Telemiades megallus|[3441]|04-SRNP-111|639[0n]bp
Telemiades megallus|[3442]|03-SRNP-30710|492[0n]bp
Telemiades megallus|[3443]|07-SRNP-42440|660[0n]bp
Telemiades megallus|[3444]|00-SRNP-21554|624[0n]bp
Telemiades megallus|[3445]|07-SRNP-4414|621[0n]bp
Telemiades megallus|[3446]|07-SRNP-42987|648[0n]bp
Telemiades megallus|[3447]|07-SRNP-5171|630[0n]bp
Telemiades megallus|[3448]|07-SRNP-42879|663[0n]bp
Telemiades megallus|[3449]|09-SRNP-69856|633[0n]bp
Telemiades oiclus|[3450]|03-SRNP-7387|669[0n]bp
Telemiades oiclus|[3451]|05-SRNP-5462|687[0n]bp
Telemiades oiclus|[3452]|03-SRNP-12536.1|669[0n]bp
Telemiades oiclus|[3453]|04-SRNP-30865|669[0n]bp
Telemiades oiclus|[3454]|04-SRNP-55048|669[0n]bp
Telemiades oiclus|[3455]|04-SRNP-56957|669[0n]bp
Telemiades oiclus|[3456]|04-SRNP-56954|669[0n]bp
Telemiades oiclus|[3457]|03-SRNP-7308|663[0n]bp
Telemiades oiclus|[3458]|01-SRNP-3727|663[0n]bp
Telemiades oiclus|[3459]|03-SRNP-12588.1|576[3n]bp
Telemiades oiclus|[3460]|03-SRNP-20865|636[0n]bp
Telemiades oiclus|[3461]|00-SRNP-22202|648[1n]bp
Telemiades oiclus|[3462]|01-SRNP-2947|669[0n]bp
Telemiades oiclus|[3463]|07-SRNP-2201|663[0n]bp
Telemiades oiclus|[3464]|01-SRNP-25089|669[0n]bp
Telemiades oiclus|[3465]|05-SRNP-42621|669[0n]bp
Telemiades oiclus|[3466]|07-SRNP-2119|645[0n]bp
Telemiades oiclus|[3467]|07-SRNP-1786|669[0n]bp
Telemiades oiclus|[3468]|07-SRNP-2582|669[0n]bp
Telemiades oiclus|[3469]|07-SRNP-33526|669[0n]bp
Telemiades nicomedes|[3470]|07-SRNP-42342|669[0n]bp
Telemiades nicomedes|[3471]|05-SRNP-33522|630[0n]bp
Telemiades nicomedes|[3472]|06-SRNP-42935|669[0n]bp
Telemiades nicomedes|[3473]|05-SRNP-33746|687[0n]bp
Telemiades nicomedes|[3474]|03-SRNP-21802|663[0n]bp
Telemiades nicomedes|[3475]|03-SRNP-27835|384[0n]bp
Telemiades nicomedes|[3476]|04-SRNP-2174|585[0n]bp
Telemiades nicomedes|[3477]|05-SRNP-43154|669[0n]bp
Telemiades nicomedes|[3478]|06-SRNP-31788|669[0n]bp
Telemiades nicomedes|[3479]|06-SRNP-31705|669[0n]bp
Telemiades nicomedes|[3480]|06-SRNP-43594|669[0n]bp
Telemiades nicomedes|[3481]|06-SRNP-65735|669[0n]bp
Telemiades nicomedes|[3482]|07-SRNP-42490|669[0n]bp
Telemiades nicomedes|[3483]|08-SRNP-65358|669[0n]bp
Telemiades nicomedes|[3484]|08-SRNP-65381|669[0n]bp
Telemiades nicomedes|[3485]|08-SRNP-40801|669[0n]bp
Telemiades nicomedes|[3486]|08-SRNP-22689|669[0n]bp
Telemiades nicomedes|[3487]|08-SRNP-22691|669[0n]bp
Telemiades nicomedes|[3488]|08-SRNP-2225|669[0n]bp
Telemiades nicomedes|[3489]|05-SRNP-33923|627[0n]bp
Telemiades nicomedes|[3490]|06-SRNP-44852|669[0n]bp
Telemiades nicomedes|[3491]|05-SRNP-34684|669[0n]bp
Telemiades nicomedes|[3492]|03-SRNP-38197|645[0n]bp
Telemiades nicomedes|[3493]|08-SRNP-40117|642[0n]bp
Telemiades nicomedes|[3494]|08-SRNP-66200|669[0n]bp
Telemiades nicomedes|[3495]|08-SRNP-72830|669[0n]bp
Telemiades Burns01|[3496]|98-SRNP-6688|480[0n]bp
Telemiades Burns01|[3497]|02-SRNP-19058|489[1n]bp
Telemiades Burns01|[3498]|07-SRNP-4410|645[0n]bp
Telemiades Burns01|[3499]|07-SRNP-3801|645[0n]bp

```

```

Telemiades Burns01|3497|02-SRNP-19058|669[0n]bp
Telemiades Burns01|3498|07-SRNP-4410|645[0n]bp
Telemiades Burns01|3499|07-SRNP-3801|645[0n]bp
Telemiades Burns01|3500|07-SRNP-3542|669[0n]bp
Telemiades Burns01|3501|07-SRNP-3804|669[0n]bp
Telemiades Burns01|3502|07-SRNP-3803|669[0n]bp
Telemiades Burns01|3503|07-SRNP-2223|669[0n]bp
Telemiades Burns01|3504|07-SRNP-1335|669[0n]bp
Telemiades Burns01|3505|02-SRNP-19057|669[0n]bp
Telemiades Burns01|3506|03-SRNP-13003.1|669[0n]bp
Telemiades Burns01|3507|07-SRNP-3807|621[0n]bp
Telemiades Burns01|3508|07-SRNP-4083|669[0n]bp
Telemiades Burns01|3509|07-SRNP-4699|669[0n]bp
Telemiades Burns01|3510|08-SRNP-79|669[0n]bp
Telemiades Burns01|3511|08-SRNP-80|669[0n]bp
Telemiades Burns01|3512|08-SRNP-941|669[0n]bp
Telemiades Burns01|3513|08-SRNP-41014|669[0n]bp
Telemiades Burns01|3514|08-SRNP-2336|669[0n]bp
Telemiades Burns01|3515|02-SRNP-18967|669[0n]bp
Telemiades Burns01|3516|07-SRNP-3519|669[0n]bp
Telemiades Burns01|3517|07-SRNP-4034|669[0n]bp
Telemiades Burns01|3518|08-SRNP-1107|669[0n]bp
Telemiades Burns08|3519|08-SRNP-65335|669[0n]bp
Telemiades Burns08|3520|09-SRNP-65738|669[0n]bp
Telemiades Burns08|3521|09-SRNP-65754|669[0n]bp
Telemiades antiopDHJ04|3522|03-SRNP-12790.1|576[0n]bp
Telemiades antiopDHJ04|3523|08-SRNP-65458|621[0n]bp
Telemiades antiopDHJ04|3524|07-SRNP-5113|606[0n]bp
Telemiades antiopDHJ04|3525|08-SRNP-40546|669[0n]bp
Telemiades antiopDHJ04|3526|08-SRNP-20658|669[0n]bp
Telemiades antiopDHJ04|3527|08-SRNP-2356|669[0n]bp
Telemiades antiopDHJ04|3528|07-SRNP-5149|669[0n]bp
Telemiades antiopDHJ04|3529|08-SRNP-213|669[0n]bp
Telemiades antiopDHJ04|3530|07-SRNP-4662|669[0n]bp
Telemiades antiopDHJ04|3531|07-SRNP-42683|669[0n]bp
Telemiades antiopDHJ04|3532|08-SRNP-25|669[0n]bp
Telemiades antiopDHJ04|3533|07-SRNP-65997|669[0n]bp
Telemiades antiopDHJ04|3534|07-SRNP-4830|669[0n]bp
Telemiades antiopDHJ04|3535|08-SRNP-90|669[0n]bp
Telemiades antiopDHJ04|3536|08-SRNP-40014|669[0n]bp
Telemiades antiopDHJ04|3537|08-SRNP-78|669[0n]bp
Telemiades antiopDHJ04|3538|07-SRNP-4413|669[0n]bp
Telemiades antiopDHJ04|3539|07-SRNP-4181|669[0n]bp
Telemiades antiopDHJ04|3540|07-SRNP-66030|669[0n]bp
Telemiades antiopDHJ04|3541|02-SRNP-5610|669[0n]bp
Telemiades antiopDHJ04|3542|07-SRNP-4622|666[0n]bp
Telemiades antiopDHJ04|3543|08-SRNP-771624|621[0n]bp
Telemiades antiopDHJ04|3544|07-SRNP-3260|657[0n]bp
Telemiades antiopDHJ04|3545|07-SRNP-5121|648[0n]bp
Telemiades antiopDHJ04|3546|02-SRNP-31972|594[0n]bp
Telemiades antiopDHJ04|3547|08-SRNP-20471|642[0n]bp
Telemiades antiopDHJ04|3548|08-SRNP-65366|669[0n]bp
Telemiades antiopDHJ04|3549|08-SRNP-20470|669[0n]bp
Telemiades antiopDHJ04|3550|08-SRNP-85|669[0n]bp
Telemiades antiopDHJ04|3551|08-SRNP-22138|669[0n]bp
Telemiades antiopDHJ04|3552|08-SRNP-66178|669[0n]bp
Telemiades antiopDHJ04|3553|08-SRNP-66078|669[0n]bp
Telemiades antiopDHJ04|3554|08-SRNP-32462|669[0n]bp
Telemiades antiopDHJ02|3555|08-SRNP-32857|633[0n]bp
Telemiades antiopDHJ02|3556|02-SRNP-19299|582[0n]bp
Telemiades antiopDHJ02|3557|07-SRNP-32031|669[0n]bp
Telemiades antiopDHJ02|3558|07-SRNP-4321|669[0n]bp
Telemiades antiopDHJ02|3559|08-SRNP-31060|669[0n]bp
Telemiades antiopDHJ02|3560|08-SRNP-66086|669[0n]bp
Telemiades antiopDHJ02|3561|08-SRNP-66041|669[0n]bp
Telemiades antiopDHJ02|3562|01-SRNP-25374|621[0n]bp
Telemiades antiopDHJ02|3563|07-SRNP-4412|669[0n]bp
Telemiades antiopDHJ02|3564|07-SRNP-4814|669[0n]bp
Telemiades antiopDHJ02|3565|07-SRNP-4822|669[0n]bp
Telemiades antiopDHJ02|3566|07-SRNP-3864|669[0n]bp
Telemiades antiopDHJ02|3567|06-SRNP-9304|669[0n]bp
Telemiades antiopDHJ02|3568|00-SRNP-14600|669[0n]bp
Telemiades antiopDHJ02|3569|07-SRNP-42387|660[0n]bp
Telemiades antiopDHJ02|3570|07-SRNP-45352|660[0n]bp
Telemiades antiopDHJ02|3571|07-SRNP-4821|663[0n]bp
Telemiades antiopDHJ02|3572|07-SRNP-42887|669[0n]bp
Telemiades antiopDHJ02|3573|07-SRNP-3822|669[0n]bp
Telemiades antiopDHJ02|3574|08-SRNP-2038|669[0n]bp
Telemiades antiopDHJ02|3575|08-SRNP-40378|669[0n]bp
Telemiades antiopDHJ02|3576|08-SRNP-31062|669[0n]bp
Telemiades antiopDHJ02|3577|08-SRNP-1018|669[0n]bp
Telemiades antiopDHJ02|3578|08-SRNP-5514|669[0n]bp
Telemiades antiopDHJ02|3579|08-SRNP-72542|669[0n]bp
Telemiades antiopDHJ02|3580|09-SRNP-40086|576[0n]bp
Telemiades antiopDHJ02|3581|07-SRNP-1844|645[0n]bp
Telemiades antiopDHJ02|3582|02-SRNP-1005|621[0n]bp
Telemiades antiopDHJ02|3583|02-SRNP-1008|621[0n]bp
Telemiades antiopDHJ02|3584|02-SRNP-1004|621[0n]bp
Telemiades antiopDHJ02|3585|02-SRNP-1451|621[0n]bp
Telemiades antiopDHJ02|3586|08-SRNP-41239|669[0n]bp
Telemiades antiopDHJ02|3587|08-SRNP-1347|669[0n]bp
Telemiades antiopDHJ02|3588|08-SRNP-40203|669[0n]bp
Telemiades antiopDHJ02|3589|08-SRNP-30634|669[0n]bp
Telemiades antiopDHJ02|3590|08-SRNP-40136|669[0n]bp
Telemiades antiopDHJ02|3591|08-SRNP-520|669[0n]bp
Telemiades antiopDHJ02|3592|08-SRNP-2122|669[0n]bp
Telemiades antiopDHJ02|3593|08-SRNP-75|669[0n]bp
Telemiades antiopDHJ02|3594|07-SRNP-4808|669[0n]bp
Telemiades antiopDHJ02|3595|07-SRNP-4177|669[0n]bp
Telemiades antiopDHJ02|3596|07-SRNP-4810|669[0n]bp
Telemiades antiopDHJ02|3597|07-SRNP-4465|669[0n]bp
Telemiades antiopDHJ02|3598|07-SRNP-5159|669[0n]bp
Telemiades antiopDHJ02|3599|07-SRNP-4154|669[0n]bp

```

|            |             |        |               |           |
|------------|-------------|--------|---------------|-----------|
| Telemiades | antiopDHJ02 | [3597] | 07-SRNP-4465  | 669[0n]bp |
| Telemiades | antiopDHJ02 | [3598] | 07-SRNP-5159  | 669[0n]bp |
| Telemiades | antiopDHJ02 | [3599] | 07-SRNP-4154  | 669[0n]bp |
| Telemiades | antiopDHJ02 | [3600] | 02-SRNP-1007  | 669[0n]bp |
| Telemiades | antiopDHJ02 | [3601] | 02-SRNP-19206 | 669[0n]bp |
| Telemiades | antiopDHJ02 | [3602] | 02-SRNP-4634  | 669[0n]bp |
| Telemiades | antiopDHJ02 | [3603] | 07-SRNP-30338 | 669[0n]bp |
| Telemiades | antiopDHJ02 | [3604] | 07-SRNP-3292  | 666[0n]bp |
| Telemiades | antiopDHJ02 | [3605] | 07-SRNP-42386 | 660[0n]bp |
| Telemiades | antiopDHJ02 | [3606] | 07-SRNP-42388 | 657[0n]bp |
| Telemiades | antiopDHJ02 | [3607] | 02-SRNP-1638  | 540[0n]bp |
| Telemiades | antiopDHJ02 | [3608] | 02-SRNP-1003  | 642[0n]bp |
| Telemiades | antiopDHJ02 | [3609] | 02-SRNP-19728 | 651[0n]bp |
| Telemiades | antiopDHJ02 | [3610] | 09-SRNP-65787 | 606[0n]bp |
| Telemiades | antiopDHJ02 | [3611] | 09-SRNP-69681 | 669[0n]bp |
| Telemiades | antiopDHJ03 | [3612] | 03-SRNP-5635  | 639[1n]bp |
| Telemiades | antiopDHJ03 | [3613] | 07-SRNP-3532  | 654[0n]bp |
| Telemiades | antiopDHJ03 | [3614] | 07-SRNP-5153  | 669[0n]bp |
| Telemiades | antiopDHJ03 | [3615] | 08-SRNP-56    | 669[0n]bp |
| Telemiades | antiopDHJ03 | [3616] | 07-SRNP-4621  | 669[0n]bp |
| Telemiades | antiopDHJ03 | [3617] | 08-SRNP-88    | 669[0n]bp |
| Telemiades | antiopDHJ03 | [3618] | 07-SRNP-65881 | 669[0n]bp |
| Telemiades | antiopDHJ03 | [3619] | 07-SRNP-4322  | 669[0n]bp |
| Telemiades | antiopDHJ03 | [3620] | 07-SRNP-65754 | 669[0n]bp |
| Telemiades | antiopDHJ03 | [3621] | 07-SRNP-2288  | 669[0n]bp |
| Telemiades | antiopDHJ03 | [3622] | 05-SRNP-31699 | 669[0n]bp |
| Telemiades | antiopDHJ03 | [3623] | 07-SRNP-4816  | 663[0n]bp |
| Telemiades | antiopDHJ03 | [3624] | 07-SRNP-3834  | 660[0n]bp |
| Telemiades | antiopDHJ03 | [3625] | 07-SRNP-3258  | 660[0n]bp |
| Telemiades | antiopDHJ03 | [3626] | 08-SRNP-53    | 651[1n]bp |
| Telemiades | antiopDHJ03 | [3627] | 08-SRNP-94    | 645[0n]bp |
| Telemiades | antiopDHJ03 | [3628] | 08-SRNP-212   | 669[0n]bp |
| Telemiades | antiopDHJ03 | [3629] | 08-SRNP-65345 | 669[0n]bp |
| Telemiades | antiopDHJ03 | [3630] | 08-SRNP-2235  | 669[0n]bp |
| Telemiades | antiopDHJ03 | [3631] | 08-SRNP-65187 | 669[0n]bp |
| Telemiades | antiopDHJ03 | [3632] | 08-SRNP-2052  | 669[0n]bp |
| Telemiades | antiopDHJ03 | [3633] | 08-SRNP-1022  | 669[0n]bp |
| Telemiades | antiopDHJ03 | [3634] | 08-SRNP-5335  | 669[0n]bp |
| Telemiades | antiopDHJ03 | [3635] | 09-SRNP-80154 | 669[0n]bp |
| Telemiades | antiopDHJ01 | [3636] | 03-SRNP-5756  | 639[0n]bp |
| Telemiades | antiopDHJ01 | [3637] | 03-SRNP-5262  | 630[0n]bp |
| Telemiades | antiopDHJ01 | [3638] | 07-SRNP-4829  | 621[0n]bp |
| Telemiades | antiopDHJ01 | [3639] | 07-SRNP-42569 | 621[0n]bp |
| Telemiades | antiopDHJ01 | [3640] | 07-SRNP-33538 | 621[0n]bp |
| Telemiades | antiopDHJ01 | [3641] | 02-SRNP-882   | 621[0n]bp |
| Telemiades | antiopDHJ01 | [3642] | 02-SRNP-19458 | 648[0n]bp |
| Telemiades | antiopDHJ01 | [3643] | 07-SRNP-4743  | 669[0n]bp |
| Telemiades | antiopDHJ01 | [3644] | 07-SRNP-5126  | 669[0n]bp |
| Telemiades | antiopDHJ01 | [3645] | 07-SRNP-4700  | 669[0n]bp |
| Telemiades | antiopDHJ01 | [3646] | 07-SRNP-4317  | 669[0n]bp |
| Telemiades | antiopDHJ01 | [3647] | 07-SRNP-4480  | 669[0n]bp |
| Telemiades | antiopDHJ01 | [3648] | 07-SRNP-4666  | 669[0n]bp |
| Telemiades | antiopDHJ01 | [3649] | 07-SRNP-41772 | 669[0n]bp |
| Telemiades | antiopDHJ01 | [3650] | 07-SRNP-41859 | 669[0n]bp |
| Telemiades | antiopDHJ01 | [3651] | 07-SRNP-32623 | 669[0n]bp |
| Telemiades | antiopDHJ01 | [3652] | 05-SRNP-2943  | 669[0n]bp |
| Telemiades | antiopDHJ01 | [3653] | 05-SRNP-31617 | 669[0n]bp |
| Telemiades | antiopDHJ01 | [3654] | 05-SRNP-31616 | 669[0n]bp |
| Telemiades | antiopDHJ01 | [3655] | 06-SRNP-22168 | 669[0n]bp |
| Telemiades | antiopDHJ01 | [3656] | 02-SRNP-19799 | 669[0n]bp |
| Telemiades | antiopDHJ01 | [3657] | 02-SRNP-31830 | 669[0n]bp |
| Telemiades | antiopDHJ01 | [3658] | 97-SRNP-6271  | 669[0n]bp |
| Telemiades | antiopDHJ01 | [3659] | 98-SRNP-4297  | 669[0n]bp |
| Telemiades | antiopDHJ01 | [3660] | 01-SRNP-9439  | 669[0n]bp |
| Telemiades | antiopDHJ01 | [3661] | 98-SRNP-4296  | 669[0n]bp |
| Telemiades | antiopDHJ01 | [3662] | 07-SRNP-65162 | 669[0n]bp |
| Telemiades | antiopDHJ01 | [3663] | 07-SRNP-4438  | 666[0n]bp |
| Telemiades | antiopDHJ01 | [3664] | 08-SRNP-74    | 660[2n]bp |
| Telemiades | antiopDHJ01 | [3665] | 07-SRNP-3358  | 666[0n]bp |
| Telemiades | antiopDHJ01 | [3666] | 07-SRNP-5012  | 660[0n]bp |
| Telemiades | antiopDHJ01 | [3667] | 07-SRNP-3831  | 660[0n]bp |
| Telemiades | antiopDHJ01 | [3668] | 07-SRNP-3359  | 660[0n]bp |
| Telemiades | antiopDHJ01 | [3669] | 02-SRNP-31831 | 603[0n]bp |
| Telemiades | antiopDHJ01 | [3670] | 02-SRNP-19598 | 579[0n]bp |
| Telemiades | antiopDHJ01 | [3671] | 02-SRNP-19126 | 630[0n]bp |
| Telemiades | antiopDHJ01 | [3672] | 02-SRNP-6041  | 585[0n]bp |
| Telemiades | antiopDHJ01 | [3673] | 01-SRNP-23390 | 594[0n]bp |
| Telemiades | antiopDHJ01 | [3674] | 07-SRNP-4015  | 384[0n]bp |
| Telemiades | antiopDHJ01 | [3675] | 07-SRNP-4768  | 651[1n]bp |
| Telemiades | antiopDHJ01 | [3676] | 07-SRNP-5014  | 633[0n]bp |
| Telemiades | antiopDHJ01 | [3677] | 07-SRNP-4178  | 669[0n]bp |
| Telemiades | antiopDHJ01 | [3678] | 07-SRNP-4705  | 669[0n]bp |
| Telemiades | antiopDHJ01 | [3679] | 07-SRNP-4179  | 669[0n]bp |
| Telemiades | antiopDHJ01 | [3680] | 08-SRNP-72    | 669[0n]bp |
| Telemiades | antiopDHJ01 | [3681] | 08-SRNP-84    | 669[0n]bp |
| Telemiades | antiopDHJ01 | [3682] | 07-SRNP-4472  | 669[0n]bp |
| Telemiades | antiopDHJ01 | [3683] | 07-SRNP-4747  | 669[0n]bp |
| Telemiades | antiopDHJ01 | [3684] | 07-SRNP-5047  | 669[0n]bp |
| Telemiades | antiopDHJ01 | [3685] | 07-SRNP-4146  | 669[0n]bp |
| Telemiades | antiopDHJ01 | [3686] | 07-SRNP-4186  | 669[0n]bp |
| Telemiades | antiopDHJ01 | [3687] | 07-SRNP-4665  | 669[0n]bp |
| Telemiades | antiopDHJ01 | [3688] | 07-SRNP-65996 | 669[0n]bp |
| Telemiades | antiopDHJ01 | [3689] | 07-SRNP-4466  | 669[0n]bp |
| Telemiades | antiopDHJ01 | [3690] | 07-SRNP-42746 | 669[0n]bp |
| Telemiades | antiopDHJ01 | [3691] | 07-SRNP-4202  | 669[0n]bp |
| Telemiades | antiopDHJ01 | [3692] | 08-SRNP-65077 | 669[0n]bp |
| Telemiades | antiopDHJ01 | [3693] | 08-SRNP-2032  | 669[0n]bp |
| Telemiades | antiopDHJ01 | [3694] | 08-SRNP-20474 | 669[0n]bp |
| Telemiades | antiopDHJ01 | [3695] | 08-SRNP-241   | 669[0n]bp |
| Telemiades | antiopDHJ01 | [3696] | 08-SRNP-21085 | 669[0n]bp |
| Telemiades | antiopDHJ01 | [3697] | 07-SRNP-23802 | 669[0n]bp |
| Telemiades | antiopDHJ01 | [3698] | 07-SRNP-4183  | 669[0n]bp |
| Telemiades | antiopDHJ01 | [3699] | 07-SRNP-3832  | 669[0n]bp |

|                         |              |        |               |     |        |
|-------------------------|--------------|--------|---------------|-----|--------|
| Telemiades              | antiopeDHJ01 | [3697] | 07-SRNP-43802 | 669 | [0n]bp |
| Telemiades              | antiopeDHJ01 | [3698] | 07-SRNP-4183  | 669 | [0n]bp |
| Telemiades              | antiopeDHJ01 | [3699] | 07-SRNP-3832  | 669 | [0n]bp |
| Telemiades              | antiopeDHJ01 | [3700] | 07-SRNP-42570 | 669 | [0n]bp |
| Telemiades              | antiopeDHJ01 | [3701] | 08-SRNP-593   | 669 | [0n]bp |
| Telemiades              | antiopeDHJ01 | [3702] | 08-SRNP-31223 | 669 | [0n]bp |
| Telemiades              | antiopeDHJ01 | [3703] | 07-SRNP-4831  | 669 | [0n]bp |
| Telemiades              | antiopeDHJ01 | [3704] | 08-SRNP-1861  | 669 | [0n]bp |
| Telemiades              | antiopeDHJ01 | [3705] | 08-SRNP-65346 | 669 | [0n]bp |
| Telemiades              | antiopeDHJ01 | [3706] | 08-SRNP-2236  | 669 | [0n]bp |
| Telemiades              | antiopeDHJ01 | [3707] | 08-SRNP-40725 | 669 | [0n]bp |
| Telemiades              | antiopeDHJ01 | [3708] | 08-SRNP-1849  | 669 | [0n]bp |
| Telemiades              | antiopeDHJ01 | [3709] | 08-SRNP-66184 | 669 | [0n]bp |
| Telemiades              | antiopeDHJ01 | [3710] | 08-SRNP-22019 | 669 | [0n]bp |
| Telemiades              | antiopeDHJ01 | [3711] | 09-SRNP-66051 | 669 | [0n]bp |
| Telemiades              | antiopeDHJ01 | [3712] | 09-SRNP-44901 | 669 | [0n]bp |
| Telemiades Burns03      |              | [3713] | 06-SRNP-43497 | 669 | [0n]bp |
| Cogia eluina            |              | [3714] | 04-SRNP-50096 | 489 | [0n]bp |
| Cogia eluina            |              | [3715] | 04-SRNP-50103 | 333 | [2n]bp |
| Cogia eluina            |              | [3716] | 05-SRNP-64296 | 645 | [0n]bp |
| Cogia eluina            |              | [3717] | 05-SRNP-64303 | 600 | [0n]bp |
| Cogia eluina            |              | [3718] | 01-SRNP-16128 | 645 | [0n]bp |
| Cogia eluina            |              | [3719] | 02-SRNP-32045 | 645 | [3n]bp |
| Cogia eluina            |              | [3720] | 04-SRNP-15978 | 627 | [0n]bp |
| Cogia eluina            |              | [3721] | 02-SRNP-17121 | 645 | [0n]bp |
| Cogia eluina            |              | [3722] | 91-SRNP-1362  | 576 | [0n]bp |
| Cogia eluina            |              | [3723] | 04-SRNP-16107 | 669 | [0n]bp |
| Cogia eluina            |              | [3724] | 06-SRNP-21562 | 669 | [0n]bp |
| Cogia eluina            |              | [3725] | 05-SRNP-56836 | 669 | [0n]bp |
| Cogia eluina            |              | [3726] | 05-SRNP-56837 | 669 | [0n]bp |
| Cogia eluina            |              | [3727] | 04-SRNP-16191 | 669 | [0n]bp |
| Cogia eluina            |              | [3728] | 04-SRNP-16194 | 669 | [0n]bp |
| Cogia eluina            |              | [3729] | 04-SRNP-14135 | 669 | [0n]bp |
| Cogia eluina            |              | [3730] | 04-SRNP-14051 | 669 | [0n]bp |
| Cogia eluina            |              | [3731] | 04-SRNP-13940 | 669 | [0n]bp |
| Cogia eluina            |              | [3732] | 05-SRNP-12004 | 666 | [0n]bp |
| Cogia eluina            |              | [3733] | 07-SRNP-22100 | 669 | [0n]bp |
| Telemiades avitus       |              | [3734] | 05-SRNP-55667 | 633 | [0n]bp |
| Telemiades avitus       |              | [3735] | 07-SRNP-41266 | 669 | [0n]bp |
| Telemiades avitus       |              | [3736] | 08-SRNP-65922 | 669 | [0n]bp |
| Heliopetes lavianaDHJ01 |              | [3737] | 07-SRNP-55300 | 486 | [5n]bp |
| Heliopetes lavianaDHJ01 |              | [3738] | 09-SRNP-57620 | 669 | [0n]bp |
| Polygonus savignyDHJ01  |              | [3739] | 01-SRNP-14590 | 660 | [0n]bp |
| Polygonus savignyDHJ01  |              | [3740] | 06-SRNP-2530  | 669 | [0n]bp |
| Polygonus savignyDHJ01  |              | [3741] | 02-SRNP-16605 | 669 | [0n]bp |
| Polygonus savignyDHJ01  |              | [3742] | 03-SRNP-15205 | 669 | [0n]bp |
| Polygonus savignyDHJ01  |              | [3743] | 91-SRNP-954   | 669 | [0n]bp |
| Polygonus savignyDHJ01  |              | [3744] | 03-SRNP-16118 | 669 | [0n]bp |
| Polygonus savignyDHJ01  |              | [3745] | 04-SRNP-46430 | 669 | [0n]bp |
| Polygonus savignyDHJ01  |              | [3746] | 04-SRNP-46324 | 669 | [0n]bp |
| Polygonus savignyDHJ01  |              | [3747] | 06-SRNP-45458 | 669 | [0n]bp |
| Polygonus savignyDHJ01  |              | [3748] | 02-SRNP-1520  | 669 | [0n]bp |
| Polygonus savignyDHJ01  |              | [3749] | 01-SRNP-14675 | 669 | [0n]bp |
| Polygonus savignyDHJ01  |              | [3750] | 02-SRNP-17731 | 669 | [0n]bp |
| Polygonus savignyDHJ01  |              | [3751] | 01-SRNP-14738 | 669 | [0n]bp |
| Polygonus savignyDHJ02  |              | [3752] | 06-SRNP-16949 | 594 | [0n]bp |
| Polygonus savignyDHJ02  |              | [3753] | 06-SRNP-56369 | 666 | [0n]bp |
| Polygonus savignyDHJ02  |              | [3754] | 06-SRNP-56370 | 669 | [0n]bp |
| Polygonus savignyDHJ02  |              | [3755] | 01-SRNP-14737 | 669 | [0n]bp |
| Polygonus savignyDHJ02  |              | [3756] | 01-SRNP-14672 | 669 | [0n]bp |
| Polygonus savignyDHJ02  |              | [3757] | 01-SRNP-14673 | 669 | [0n]bp |
| Polygonus savignyDHJ02  |              | [3758] | 01-SRNP-14671 | 669 | [0n]bp |
| Polygonus savignyDHJ02  |              | [3759] | 01-SRNP-14670 | 669 | [0n]bp |
| Polygonus savignyDHJ02  |              | [3760] | 01-SRNP-14669 | 669 | [0n]bp |
| Polygonus savignyDHJ02  |              | [3761] | 01-SRNP-14668 | 669 | [0n]bp |
| Polygonus savignyDHJ02  |              | [3762] | 01-SRNP-14674 | 669 | [0n]bp |
| Polygonus savignyDHJ02  |              | [3763] | 01-SRNP-14676 | 669 | [0n]bp |
| Polygonus savignyDHJ02  |              | [3764] | 91-SRNP-431   | 606 | [0n]bp |
| Polygonus savignyDHJ02  |              | [3765] | 08-SRNP-1689  | 669 | [0n]bp |
| Polygonus savignyDHJ02  |              | [3766] | 08-SRNP-1690  | 669 | [0n]bp |
| Polygonus leo           |              | [3767] | 05-SRNP-1988  | 669 | [0n]bp |
| Polygonus leo           |              | [3768] | 05-SRNP-45857 | 627 | [0n]bp |
| Polygonus leo           |              | [3769] | 04-SRNP-46889 | 669 | [0n]bp |
| Polygonus leo           |              | [3770] | 05-SRNP-1445  | 669 | [0n]bp |
| Polygonus leo           |              | [3771] | 05-SRNP-1699  | 669 | [0n]bp |
| Polygonus leo           |              | [3772] | 05-SRNP-63797 | 633 | [0n]bp |
| Polygonus leo           |              | [3773] | 05-SRNP-1444  | 669 | [0n]bp |
| Polygonus leo           |              | [3774] | 05-SRNP-1448  | 669 | [0n]bp |
| Polygonus leo           |              | [3775] | 05-SRNP-1987  | 669 | [0n]bp |
| Polygonus leo           |              | [3776] | 08-SRNP-55973 | 669 | [0n]bp |
| Polygonus leo           |              | [3777] | 06-SRNP-15696 | 669 | [0n]bp |
| Polygonus leo           |              | [3778] | 06-SRNP-15549 | 669 | [0n]bp |
| Polygonus leo           |              | [3779] | 06-SRNP-15550 | 669 | [1n]bp |
| Polygonus leo           |              | [3780] | 06-SRNP-15695 | 600 | [1n]bp |
| Polygonus leo           |              | [3781] | 08-SRNP-55955 | 669 | [0n]bp |
| Polygonus leo           |              | [3782] | 04-SRNP-46785 | 669 | [0n]bp |
| Polygonus leo           |              | [3783] | 09-SRNP-14024 | 669 | [0n]bp |
| Astraptes INGCUP        |              | [3784] | 97-SRNP-6203  | 645 | [0n]bp |
| Astraptes INGCUP        |              | [3785] | 00-SRNP-20677 | 645 | [0n]bp |
| Astraptes INGCUP        |              | [3786] | 07-SRNP-4771  | 603 | [1n]bp |
| Astraptes INGCUP        |              | [3787] | 08-SRNP-1416  | 645 | [0n]bp |
| Astraptes INGCUP        |              | [3788] | 08-SRNP-1414  | 645 | [0n]bp |
| Astraptes INGCUP        |              | [3789] | 08-SRNP-82    | 645 | [0n]bp |
| Astraptes INGCUP        |              | [3790] | 08-SRNP-130   | 645 | [0n]bp |
| Astraptes INGCUP        |              | [3791] | 95-SRNP-8692  | 651 | [0n]bp |
| Astraptes INGCUP        |              | [3792] | 01-SRNP-5312  | 651 | [0n]bp |
| Astraptes INGCUP        |              | [3793] | 02-SRNP-29904 | 651 | [0n]bp |
| Astraptes INGCUP        |              | [3794] | 01-SRNP-508   | 651 | [0n]bp |
| Astraptes INGCUP        |              | [3795] | 99-SRNP-4982  | 651 | [0n]bp |
| Astraptes INGCUP        |              | [3796] | 96-SRNP-9864  | 651 | [0n]bp |
| Astraptes INGCUP        |              | [3797] | 98-SRNP-6438  | 651 | [0n]bp |
| Astraptes INGCUP        |              | [3798] | 97-SRNP-6595  | 651 | [0n]bp |
| Astraptes INGCUP        |              | [3799] | 99-SRNP-4173  | 651 | [0n]bp |

|            |        |        |                |           |
|------------|--------|--------|----------------|-----------|
| Astraptles | INGCUP | [3797] | 98-SRNP-6438   | 651[0n]bp |
| Astraptles | INGCUP | [3798] | 97-SRNP-6595   | 651[0n]bp |
| Astraptles | INGCUP | [3799] | 99-SRNP-4173   | 651[0n]bp |
| Astraptles | INGCUP | [3800] | 02-SRNP-24431  | 651[0n]bp |
| Astraptles | INGCUP | [3801] | 97-SRNP-6205   | 651[0n]bp |
| Astraptles | INGCUP | [3802] | 02-SRNP-9735   | 651[0n]bp |
| Astraptles | INGCUP | [3803] | 02-SRNP-20351  | 651[0n]bp |
| Astraptles | INGCUP | [3804] | 02-SRNP-19906  | 651[0n]bp |
| Astraptles | INGCUP | [3805] | 02-SRNP-20353  | 651[0n]bp |
| Astraptles | INGCUP | [3806] | 02-SRNP-9734   | 651[0n]bp |
| Astraptles | INGCUP | [3807] | 99-SRNP-5123   | 651[0n]bp |
| Astraptles | INGCUP | [3808] | 99-SRNP-4985   | 651[0n]bp |
| Astraptles | INGCUP | [3809] | 97-SRNP-6231   | 651[0n]bp |
| Astraptles | INGCUP | [3810] | 99-SRNP-5917   | 651[0n]bp |
| Astraptles | INGCUP | [3811] | 95-SRNP-4448   | 651[0n]bp |
| Astraptles | INGCUP | [3812] | 97-SRNP-6024   | 651[0n]bp |
| Astraptles | INGCUP | [3813] | 01-SRNP-1966   | 651[0n]bp |
| Astraptles | INGCUP | [3814] | 01-SRNP-1389   | 651[0n]bp |
| Astraptles | INGCUP | [3815] | 01-SRNP-7101   | 651[0n]bp |
| Astraptles | INGCUP | [3816] | 02-SRNP-19350  | 651[0n]bp |
| Astraptles | INGCUP | [3817] | 02-SRNP-21515  | 651[0n]bp |
| Astraptles | INGCUP | [3818] | 97-SRNP-7123   | 651[0n]bp |
| Astraptles | INGCUP | [3819] | 01-SRNP-947    | 651[0n]bp |
| Astraptles | INGCUP | [3820] | 97-SRNP-7160   | 651[0n]bp |
| Astraptles | INGCUP | [3821] | 93-SRNP-2396   | 651[0n]bp |
| Astraptles | INGCUP | [3822] | 00-SRNP-15880  | 651[0n]bp |
| Astraptles | INGCUP | [3823] | 93-SRNP-2622   | 651[0n]bp |
| Astraptles | INGCUP | [3824] | 93-SRNP-2796   | 651[0n]bp |
| Astraptles | INGCUP | [3825] | 99-SRNP-10568  | 651[0n]bp |
| Astraptles | INGCUP | [3826] | 02-SRNP-32205  | 651[0n]bp |
| Astraptles | INGCUP | [3827] | 92-SRNP-3026   | 651[0n]bp |
| Astraptles | INGCUP | [3828] | 91-SRNP-2219   | 651[0n]bp |
| Astraptles | INGCUP | [3829] | 00-SRNP-2547   | 651[0n]bp |
| Astraptles | INGCUP | [3830] | 02-SRNP-32206  | 651[0n]bp |
| Astraptles | INGCUP | [3831] | 02-SRNP-19576  | 651[0n]bp |
| Astraptles | INGCUP | [3832] | 02-SRNP-20092  | 651[0n]bp |
| Astraptles | INGCUP | [3833] | 96-SRNP-934    | 651[0n]bp |
| Astraptles | INGCUP | [3834] | 02-SRNP-19721  | 651[0n]bp |
| Astraptles | INGCUP | [3835] | 98-SRNP-6516   | 651[0n]bp |
| Astraptles | INGCUP | [3836] | 02-SRNP-29906  | 651[0n]bp |
| Astraptles | INGCUP | [3837] | 98-SRNP-6370   | 651[0n]bp |
| Astraptles | INGCUP | [3838] | 94-SRNP-4843   | 651[0n]bp |
| Astraptles | INGCUP | [3839] | 02-SRNP-32204  | 651[0n]bp |
| Astraptles | INGCUP | [3840] | 92-SRNP-3121   | 651[0n]bp |
| Astraptles | INGCUP | [3841] | 99-SRNP-10560  | 651[0n]bp |
| Astraptles | INGCUP | [3842] | 94-SRNP-3011   | 651[0n]bp |
| Astraptles | INGCUP | [3843] | 00-SRNP-15081  | 651[0n]bp |
| Astraptles | INGCUP | [3844] | 94-SRNP-4958   | 651[0n]bp |
| Astraptles | INGCUP | [3845] | 96-SRNP-6841.1 | 651[0n]bp |
| Astraptles | INGCUP | [3846] | 08-SRNP-5592   | 669[0n]bp |
| Astraptles | INGCUP | [3847] | 08-SRNP-1415   | 669[0n]bp |
| Astraptles | INGCUP | [3848] | 07-SRNP-42970  | 669[0n]bp |
| Astraptles | INGCUP | [3849] | 08-SRNP-21067  | 669[0n]bp |
| Astraptles | INGCUP | [3850] | 08-SRNP-65396  | 669[0n]bp |
| Astraptles | INGCUP | [3851] | 08-SRNP-70409  | 669[0n]bp |
| Astraptles | INGCUP | [3852] | 08-SRNP-2460   | 669[0n]bp |
| Astraptles | INGCUP | [3853] | 08-SRNP-1900   | 669[0n]bp |
| Astraptles | INGCUP | [3854] | 07-SRNP-61013  | 669[0n]bp |
| Astraptles | INGCUP | [3855] | 08-SRNP-1792   | 669[0n]bp |
| Astraptles | INGCUP | [3856] | 08-SRNP-40658  | 669[0n]bp |
| Astraptles | INGCUP | [3857] | 08-SRNP-81     | 669[0n]bp |
| Astraptles | INGCUP | [3858] | 08-SRNP-280    | 669[0n]bp |
| Astraptles | INGCUP | [3859] | 08-SRNP-1417   | 669[0n]bp |
| Astraptles | INGCUP | [3860] | 07-SRNP-5172   | 669[0n]bp |
| Astraptles | INGCUP | [3861] | 08-SRNP-1901   | 669[0n]bp |
| Astraptles | INGCUP | [3862] | 07-SRNP-42840  | 669[0n]bp |
| Astraptles | INGCUP | [3863] | 07-SRNP-5170   | 669[0n]bp |
| Astraptles | INGCUP | [3864] | 08-SRNP-59     | 669[0n]bp |
| Astraptles | INGCUP | [3865] | 07-SRNP-45415  | 669[0n]bp |
| Astraptles | INGCUP | [3866] | 07-SRNP-58527  | 669[0n]bp |
| Astraptles | INGCUP | [3867] | 07-SRNP-3511   | 669[0n]bp |
| Astraptles | INGCUP | [3868] | 07-SRNP-45414  | 669[0n]bp |
| Astraptles | INGCUP | [3869] | 07-SRNP-58050  | 669[0n]bp |
| Astraptles | INGCUP | [3870] | 07-SRNP-3512   | 669[0n]bp |
| Astraptles | INGCUP | [3871] | 07-SRNP-21910  | 669[0n]bp |
| Astraptles | INGCUP | [3872] | 07-SRNP-1753   | 669[0n]bp |
| Astraptles | INGCUP | [3873] | 07-SRNP-1790   | 669[0n]bp |
| Astraptles | INGCUP | [3874] | 07-SRNP-40141  | 669[0n]bp |
| Astraptles | INGCUP | [3875] | 07-SRNP-579    | 669[0n]bp |
| Astraptles | INGCUP | [3876] | 07-SRNP-1286   | 669[0n]bp |
| Astraptles | INGCUP | [3877] | 07-SRNP-1285   | 669[0n]bp |
| Astraptles | INGCUP | [3878] | 07-SRNP-380    | 669[0n]bp |
| Astraptles | INGCUP | [3879] | 07-SRNP-381    | 669[0n]bp |
| Astraptles | INGCUP | [3880] | 06-SRNP-9898   | 669[0n]bp |
| Astraptles | INGCUP | [3881] | 06-SRNP-9899   | 669[0n]bp |
| Astraptles | INGCUP | [3882] | 06-SRNP-46318  | 669[0n]bp |
| Astraptles | INGCUP | [3883] | 06-SRNP-34320  | 669[0n]bp |
| Astraptles | INGCUP | [3884] | 06-SRNP-8910   | 669[0n]bp |
| Astraptles | INGCUP | [3885] | 06-SRNP-34321  | 669[0n]bp |
| Astraptles | INGCUP | [3886] | 06-SRNP-46151  | 669[0n]bp |
| Astraptles | INGCUP | [3887] | 06-SRNP-35256  | 669[0n]bp |
| Astraptles | INGCUP | [3888] | 06-SRNP-8752   | 669[0n]bp |
| Astraptles | INGCUP | [3889] | 04-SRNP-46483  | 669[0n]bp |
| Astraptles | INGCUP | [3890] | 04-SRNP-40688  | 669[0n]bp |
| Astraptles | INGCUP | [3891] | 04-SRNP-46477  | 669[0n]bp |
| Astraptles | INGCUP | [3892] | 04-SRNP-60805  | 669[0n]bp |
| Astraptles | INGCUP | [3893] | 03-SRNP-5634   | 669[0n]bp |
| Astraptles | INGCUP | [3894] | 05-SRNP-48590  | 669[0n]bp |
| Astraptles | INGCUP | [3895] | 05-SRNP-58120  | 669[0n]bp |
| Astraptles | INGCUP | [3896] | 05-SRNP-40683  | 669[0n]bp |
| Astraptles | INGCUP | [3897] | 05-SRNP-2221   | 669[0n]bp |
| Astraptles | INGCUP | [3898] | 06-SRNP-55334  | 669[0n]bp |
| Astraptles | INGCUP | [3899] | 07-SRNP-4895   | 621[0n]bp |



|           |                  |        |               |           |
|-----------|------------------|--------|---------------|-----------|
| Astraptus | INGCUP           | [3897] | 05-SRNP-2221  | 669[0n]bp |
| Astraptus | INGCUP           | [3898] | 06-SRNP-55334 | 669[0n]bp |
| Astraptus | INGCUP           | [3899] | 07-SRNP-4895  | 621[0n]bp |
| Astraptus | INGCUP           | [3900] | 07-SRNP-4323  | 657[1n]bp |
| Astraptus | INGCUP           | [3901] | 07-SRNP-4552  | 654[0n]bp |
| Astraptus | INGCUP           | [3902] | 07-SRNP-4225  | 654[0n]bp |
| Astraptus | INGCUP           | [3903] | 07-SRNP-42991 | 654[0n]bp |
| Astraptus | INGCUP           | [3904] | 07-SRNP-4229  | 648[0n]bp |
| Astraptus | INGCUP           | [3905] | 07-SRNP-46516 | 654[1n]bp |
| Astraptus | INGCUP           | [3906] | 07-SRNP-5013  | 627[0n]bp |
| Astraptus | INGCUP           | [3907] | 07-SRNP-4884  | 633[0n]bp |
| Astraptus | INGCUP           | [3908] | 06-SRNP-31876 | 633[0n]bp |
| Astraptus | INGCUP           | [3909] | 99-SRNP-4980  | 642[0n]bp |
| Astraptus | INGCUP           | [3910] | 97-SRNP-6144  | 639[0n]bp |
| Astraptus | INGCUP           | [3911] | 02-SRNP-20352 | 651[0n]bp |
| Astraptus | INGCUP           | [3912] | 02-SRNP-19284 | 651[0n]bp |
| Astraptus | INGCUP           | [3913] | 07-SRNP-4462  | 630[0n]bp |
| Astraptus | INGCUP           | [3914] | 07-SRNP-4324  | 657[1n]bp |
| Astraptus | INGCUP           | [3915] | 07-SRNP-4806  | 636[0n]bp |
| Astraptus | INGCUP           | [3916] | 07-SRNP-2374  | 666[0n]bp |
| Astraptus | INGCUP           | [3917] | 07-SRNP-3068  | 666[0n]bp |
| Astraptus | INGCUP           | [3918] | 04-SRNP-40472 | 663[0n]bp |
| Astraptus | INGCUP           | [3919] | 06-SRNP-46319 | 666[0n]bp |
| Astraptus | INGCUP           | [3920] | 03-SRNP-5870  | 666[0n]bp |
| Astraptus | INGCUP           | [3921] | 04-SRNP-47856 | 666[0n]bp |
| Astraptus | INGCUP           | [3922] | 99-SRNP-13677 | 651[0n]bp |
| Astraptus | INGCUP           | [3923] | 07-SRNP-31660 | 669[0n]bp |
| Astraptus | INGCUP           | [3924] | 06-SRNP-46276 | 666[0n]bp |
| Astraptus | INGCUP           | [3925] | 04-SRNP-47345 | 666[0n]bp |
| Astraptus | INGCUP           | [3926] | 04-SRNP-2251  | 666[0n]bp |
| Astraptus | INGCUP           | [3927] | 05-SRNP-1361  | 666[0n]bp |
| Astraptus | INGCUP           | [3928] | 07-SRNP-58736 | 669[0n]bp |
| Astraptus | INGCUP           | [3929] | 04-SRNP-47196 | 666[0n]bp |
| Astraptus | INGCUP           | [3930] | 06-SRNP-55405 | 669[2n]bp |
| Astraptus | INGCUP           | [3931] | 07-SRNP-1054  | 669[0n]bp |
| Astraptus | INGCUP           | [3932] | 07-SRNP-1595  | 666[0n]bp |
| Astraptus | INGCUP           | [3933] | 04-SRNP-61428 | 666[0n]bp |
| Astraptus | INGCUP           | [3934] | 05-SRNP-19576 | 666[0n]bp |
| Astraptus | INGCUP           | [3935] | 05-SRNP-58121 | 666[0n]bp |
| Astraptus | INGCUP           | [3936] | 07-SRNP-4606  | 660[2n]bp |
| Astraptus | INGCUP           | [3937] | 97-SRNP-5640  | 651[0n]bp |
| Astraptus | INGCUP           | [3938] | 07-SRNP-4488  | 633[0n]bp |
| Astraptus | INGCUP           | [3939] | 07-SRNP-4489  | 621[0n]bp |
| Astraptus | INGCUP           | [3940] | 07-SRNP-4608  | 654[1n]bp |
| Astraptus | INGCUP           | [3941] | 04-SRNP-47346 | 666[0n]bp |
| Astraptus | INGCUP           | [3942] | 08-SRNP-1418  | 654[1n]bp |
| Astraptus | INGCUP           | [3943] | 04-SRNP-40582 | 624[0n]bp |
| Astraptus | INGCUP           | [3944] | 07-SRNP-4277  | 633[0n]bp |
| Astraptus | INGCUP           | [3945] | 04-SRNP-35086 | 630[1n]bp |
| Astraptus | INGCUP           | [3946] | 07-SRNP-4833  | 642[0n]bp |
| Astraptus | INGCUP           | [3947] | 03-SRNP-15979 | 669[1n]bp |
| Astraptus | HIHAMP           | [3948] | 04-SRNP-35067 | 648[0n]bp |
| Astraptus | HIHAMP           | [3949] | 04-SRNP-35081 | 615[2n]bp |
| Astraptus | HIHAMP           | [3950] | 06-SRNP-36085 | 618[0n]bp |
| Astraptus | HIHAMP           | [3951] | 07-SRNP-35469 | 669[1n]bp |
| Astraptus | HIHAMP           | [3952] | 06-SRNP-36608 | 615[0n]bp |
| Astraptus | HIHAMP           | [3953] | 99-SRNP-1215  | 651[0n]bp |
| Astraptus | HIHAMP           | [3954] | 04-SRNP-56052 | 669[0n]bp |
| Astraptus | HIHAMP           | [3955] | 03-SRNP-22543 | 669[0n]bp |
| Astraptus | HIHAMP           | [3956] | 07-SRNP-45714 | 669[0n]bp |
| Astraptus | HIHAMP           | [3957] | 05-SRNP-35903 | 666[0n]bp |
| Astraptus | HIHAMP           | [3958] | 07-SRNP-45437 | 669[0n]bp |
| Astraptus | HIHAMP           | [3959] | 07-SRNP-36293 | 669[0n]bp |
| Astraptus | HIHAMP           | [3960] | 07-SRNP-35467 | 669[0n]bp |
| Astraptus | HIHAMP           | [3961] | 07-SRNP-35468 | 669[0n]bp |
| Astraptus | HIHAMP           | [3962] | 06-SRNP-36705 | 669[0n]bp |
| Astraptus | HIHAMP           | [3963] | 06-SRNP-36706 | 669[0n]bp |
| Astraptus | HIHAMP           | [3964] | 06-SRNP-35831 | 669[0n]bp |
| Astraptus | HIHAMP           | [3965] | 06-SRNP-36787 | 669[0n]bp |
| Astraptus | HIHAMP           | [3966] | 06-SRNP-36083 | 669[0n]bp |
| Astraptus | HIHAMP           | [3967] | 06-SRNP-35716 | 669[0n]bp |
| Astraptus | HIHAMP           | [3968] | 03-SRNP-3079  | 669[0n]bp |
| Astraptus | HIHAMP           | [3969] | 05-SRNP-35763 | 669[0n]bp |
| Astraptus | HIHAMP           | [3970] | 05-SRNP-35765 | 669[0n]bp |
| Astraptus | HIHAMP           | [3971] | 06-SRNP-35832 | 663[0n]bp |
| Astraptus | HIHAMP           | [3972] | 97-SRNP-1804  | 651[0n]bp |
| Astraptus | HIHAMP           | [3973] | 01-SRNP-7374  | 651[0n]bp |
| Astraptus | HIHAMP           | [3974] | 02-SRNP-23035 | 651[0n]bp |
| Astraptus | HIHAMP           | [3975] | 99-SRNP-1220  | 651[0n]bp |
| Astraptus | HIHAMP           | [3976] | 00-SRNP-22183 | 651[0n]bp |
| Astraptus | HIHAMP           | [3977] | 01-SRNP-6199  | 651[0n]bp |
| Astraptus | HIHAMP           | [3978] | 99-SRNP-1098  | 651[0n]bp |
| Astraptus | HIHAMP           | [3979] | 95-SRNP-666   | 651[0n]bp |
| Astraptus | HIHAMP           | [3980] | 00-SRNP-10424 | 651[0n]bp |
| Astraptus | HIHAMP           | [3981] | 97-SRNP-1588  | 651[0n]bp |
| Astraptus | HIHAMP           | [3982] | 97-SRNP-1613  | 651[0n]bp |
| Astraptus | INGCUP           | [3983] | 05-SRNP-34301 | 642[0n]bp |
| Astraptus | HIHAMP           | [3984] | 01-SRNP-7327  | 642[0n]bp |
| Astraptus | HIHAMP           | [3985] | 97-SRNP-1641  | 645[0n]bp |
| Astraptus | HIHAMP           | [3986] | 07-SRNP-45715 | 633[0n]bp |
| Astraptus | HIHAMP           | [3987] | 07-SRNP-36295 | 654[2n]bp |
| Astraptus | HIHAMP           | [3988] | 08-SRNP-35798 | 669[0n]bp |
| Astraptus | HIHAMP           | [3989] | 08-SRNP-6196  | 669[0n]bp |
| Astraptus | fulgerator group | [3990] | 09-SRNP-72096 | 669[0n]bp |
| Astraptus | INGCUP           | [3991] | 06-SRNP-23021 | 648[0n]bp |
| Astraptus | INGCUP           | [3992] | 07-SRNP-4664  | 648[1n]bp |
| Astraptus | INGCUP           | [3993] | 07-SRNP-55016 | 669[1n]bp |
| Astraptus | MYST             | [3994] | 90-SRNP-1632  | 585[0n]bp |
| Astraptus | MYST             | [3995] | 02-SRNP-33369 | 651[0n]bp |
| Astraptus | MYST             | [3996] | 02-SRNP-33451 | 651[0n]bp |
| Astraptus | MYST             | [3997] | 03-SRNP-21723 | 669[0n]bp |
| Astraptus | MYST             | [3998] | 03-SRNP-20884 | 669[0n]bp |
| Astraptus | MYST             | [3999] | 03-SRNP-31167 | 669[0n]bp |

|           |         |        |               |     |      |    |
|-----------|---------|--------|---------------|-----|------|----|
| Astraptes | MYST    | [3997] | 03-SRNP-21723 | 669 | [0n] | bp |
| Astraptes | MYST    | [3998] | 03-SRNP-20884 | 669 | [0n] | bp |
| Astraptes | MYST    | [3999] | 03-SRNP-31167 | 669 | [0n] | bp |
| Astraptes | MYST    | [4000] | 06-SRNP-41913 | 669 | [0n] | bp |
| Astraptes | YESENN  | [4001] | 07-SRNP-45998 | 612 | [0n] | bp |
| Astraptes | INGCUP  | [4002] | 03-SRNP-10415 | 669 | [0n] | bp |
| Astraptes | INGCUP  | [4003] | 06-SRNP-3381  | 669 | [0n] | bp |
| Astraptes | INGCUP  | [4004] | 07-SRNP-4663  | 618 | [0n] | bp |
| Astraptes | INGCUP  | [4005] | 02-SRNP-33256 | 651 | [0n] | bp |
| Astraptes | INGCUP  | [4006] | 07-SRNP-1756  | 561 | [4n] | bp |
| Astraptes | INGCUP  | [4007] | 07-SRNP-4469  | 615 | [5n] | bp |
| Astraptes | INGCUP  | [4008] | 07-SRNP-33557 | 618 | [3n] | bp |
| Astraptes | FABOV   | [4009] | 94-SRNP-678   | 651 | [0n] | bp |
| Astraptes | FABOV   | [4010] | 06-SRNP-47519 | 618 | [0n] | bp |
| Astraptes | FABOV   | [4011] | 98-SRNP-79    | 651 | [0n] | bp |
| Astraptes | FABOV   | [4012] | 03-SRNP-38625 | 624 | [0n] | bp |
| Astraptes | FABOV   | [4013] | 05-SRNP-34585 | 669 | [1n] | bp |
| Astraptes | FABOV   | [4014] | 03-SRNP-38030 | 666 | [0n] | bp |
| Astraptes | FABOV   | [4015] | 04-SRNP-47477 | 666 | [0n] | bp |
| Astraptes | FABOV   | [4016] | 03-SRNP-18628 | 666 | [0n] | bp |
| Astraptes | FABOV   | [4017] | 03-SRNP-21672 | 666 | [0n] | bp |
| Astraptes | FABOV   | [4018] | 03-SRNP-1100  | 666 | [0n] | bp |
| Astraptes | FABOV   | [4019] | 04-SRNP-47263 | 666 | [0n] | bp |
| Astraptes | FABOV   | [4020] | 05-SRNP-20134 | 666 | [0n] | bp |
| Astraptes | FABOV   | [4021] | 04-SRNP-27294 | 666 | [0n] | bp |
| Astraptes | FABOV   | [4022] | 04-SRNP-47478 | 666 | [0n] | bp |
| Astraptes | FABOV   | [4023] | 04-SRNP-15696 | 666 | [0n] | bp |
| Astraptes | FABOV   | [4024] | 07-SRNP-40452 | 666 | [0n] | bp |
| Astraptes | FABOV   | [4025] | 05-SRNP-30622 | 666 | [0n] | bp |
| Astraptes | FABOV   | [4026] | 08-SRNP-45170 | 669 | [0n] | bp |
| Astraptes | FABOV   | [4027] | 08-SRNP-6000  | 669 | [0n] | bp |
| Astraptes | FABOV   | [4028] | 07-SRNP-21410 | 669 | [0n] | bp |
| Astraptes | FABOV   | [4029] | 07-SRNP-58607 | 669 | [0n] | bp |
| Astraptes | FABOV   | [4030] | 07-SRNP-40453 | 669 | [0n] | bp |
| Astraptes | FABOV   | [4031] | 07-SRNP-22021 | 669 | [0n] | bp |
| Astraptes | FABOV   | [4032] | 04-SRNP-22024 | 669 | [0n] | bp |
| Astraptes | FABOV   | [4033] | 05-SRNP-25512 | 669 | [0n] | bp |
| Astraptes | FABOV   | [4034] | 03-SRNP-15973 | 669 | [0n] | bp |
| Astraptes | FABOV   | [4035] | 03-SRNP-19356 | 669 | [0n] | bp |
| Astraptes | FABOV   | [4036] | 04-SRNP-50141 | 669 | [0n] | bp |
| Astraptes | FABOV   | [4037] | 04-SRNP-56195 | 669 | [0n] | bp |
| Astraptes | FABOV   | [4038] | 04-SRNP-26414 | 669 | [0n] | bp |
| Astraptes | FABOV   | [4039] | 94-SRNP-5469  | 651 | [0n] | bp |
| Astraptes | FABOV   | [4040] | 80-SRNP-216   | 651 | [0n] | bp |
| Astraptes | FABOV   | [4041] | 97-SRNP-5023  | 651 | [0n] | bp |
| Astraptes | FABOV   | [4042] | 97-SRNP-5143  | 651 | [0n] | bp |
| Astraptes | FABOV   | [4043] | 02-SRNP-13079 | 651 | [0n] | bp |
| Astraptes | FABOV   | [4044] | 95-SRNP-6867  | 651 | [0n] | bp |
| Astraptes | FABOV   | [4045] | 92-SRNP-6023  | 651 | [0n] | bp |
| Astraptes | FABOV   | [4046] | 93-SRNP-6312  | 651 | [0n] | bp |
| Astraptes | FABOV   | [4047] | 95-SRNP-6871  | 651 | [0n] | bp |
| Astraptes | FABOV   | [4048] | 97-SRNP-5060  | 651 | [0n] | bp |
| Astraptes | FABOV   | [4049] | 93-SRNP-7060  | 651 | [0n] | bp |
| Astraptes | FABOV   | [4050] | 02-SRNP-31579 | 651 | [0n] | bp |
| Astraptes | FABOV   | [4051] | 95-SRNP-9320  | 651 | [0n] | bp |
| Astraptes | FABOV   | [4052] | 02-SRNP-31569 | 651 | [0n] | bp |
| Astraptes | FABOV   | [4053] | 02-SRNP-13082 | 651 | [0n] | bp |
| Astraptes | FABOV   | [4054] | 96-SRNP-171   | 651 | [0n] | bp |
| Astraptes | FABOV   | [4055] | 95-SRNP-6103  | 651 | [0n] | bp |
| Astraptes | FABOV   | [4056] | 95-SRNP-511   | 651 | [0n] | bp |
| Astraptes | FABOV   | [4057] | 99-SRNP-8551  | 651 | [0n] | bp |
| Astraptes | FABOV   | [4058] | 02-SRNP-28909 | 651 | [0n] | bp |
| Astraptes | FABOV   | [4059] | 97-SRNP-5809  | 642 | [0n] | bp |
| Astraptes | FABOV   | [4060] | 97-SRNP-5926  | 645 | [0n] | bp |
| Astraptes | FABOV   | [4061] | 92-SRNP-4645  | 648 | [0n] | bp |
| Astraptes | FABOV   | [4062] | 95-SRNP-6866  | 648 | [0n] | bp |
| Astraptes | FABOV   | [4063] | 94-SRNP-745   | 630 | [0n] | bp |
| Astraptes | FABOV   | [4064] | 04-SRNP-15697 | 633 | [0n] | bp |
| Astraptes | FABOV   | [4065] | 05-SRNP-45420 | 669 | [0n] | bp |
| Astraptes | FABOV   | [4066] | 80-SRNP-160   | 627 | [0n] | bp |
| Astraptes | FABOV   | [4067] | 97-SRNP-5927  | 651 | [0n] | bp |
| Astraptes | FABOV   | [4068] | 04-SRNP-27295 | 669 | [0n] | bp |
| Astraptes | FABOV   | [4069] | 07-SRNP-56300 | 669 | [0n] | bp |
| Astraptes | FABOV   | [4070] | 05-SRNP-20856 | 669 | [0n] | bp |
| Astraptes | FABOV   | [4071] | 95-SRNP-8306  | 651 | [0n] | bp |
| Astraptes | FABOV   | [4072] | 97-SRNP-5969  | 642 | [0n] | bp |
| Astraptes | FABOV   | [4073] | 05-SRNP-21651 | 669 | [0n] | bp |
| Astraptes | FABOV   | [4074] | 05-SRNP-60050 | 669 | [0n] | bp |
| Astraptes | FABOV   | [4075] | 08-SRNP-58528 | 669 | [0n] | bp |
| Astraptes | enta    | [4076] | 03-SRNP-11423 | 666 | [0n] | bp |
| Astraptes | enta    | [4077] | 07-SRNP-42567 | 669 | [0n] | bp |
| Astraptes | enta    | [4078] | 09-SRNP-75531 | 669 | [0n] | bp |
| Astraptes | BYTTNER | [4079] | 95-SRNP-8045  | 651 | [0n] | bp |
| Astraptes | BYTTNER | [4080] | 95-SRNP-8046  | 651 | [0n] | bp |
| Astraptes | BYTTNER | [4081] | 95-SRNP-8044  | 645 | [0n] | bp |
| Astraptes | LOHAMP  | [4082] | 99-SRNP-17057 | 375 | [0n] | bp |
| Astraptes | LOHAMP  | [4083] | 06-SRNP-36233 | 588 | [1n] | bp |
| Astraptes | LOHAMP  | [4084] | 06-SRNP-36395 | 612 | [2n] | bp |
| Astraptes | LOHAMP  | [4085] | 06-SRNP-31669 | 633 | [2n] | bp |
| Astraptes | LOHAMP  | [4086] | 06-SRNP-36238 | 600 | [0n] | bp |
| Astraptes | LOHAMP  | [4087] | 03-SRNP-4251  | 666 | [1n] | bp |
| Astraptes | LOHAMP  | [4088] | 06-SRNP-36296 | 615 | [0n] | bp |
| Astraptes | LOHAMP  | [4089] | 07-SRNP-2042  | 618 | [0n] | bp |
| Astraptes | LOHAMP  | [4090] | 04-SRNP-35879 | 624 | [0n] | bp |
| Astraptes | LOHAMP  | [4091] | 06-SRNP-36344 | 612 | [0n] | bp |
| Astraptes | LOHAMP  | [4092] | 06-SRNP-36346 | 612 | [0n] | bp |
| Astraptes | LOHAMP  | [4093] | 06-SRNP-36338 | 621 | [0n] | bp |
| Astraptes | LOHAMP  | [4094] | 06-SRNP-7043  | 657 | [0n] | bp |
| Astraptes | LOHAMP  | [4095] | 06-SRNP-7363  | 657 | [0n] | bp |
| Astraptes | LOHAMP  | [4096] | 06-SRNP-8179  | 633 | [0n] | bp |
| Astraptes | LOHAMP  | [4097] | 04-SRNP-35147 | 633 | [0n] | bp |
| Astraptes | LOHAMP  | [4098] | 03-SRNP-3139  | 633 | [0n] | bp |
| Astraptes | LOHAMP  | [4099] | 04-SRNP-61342 | 633 | [0n] | bp |

|            |        |        |               |           |
|------------|--------|--------|---------------|-----------|
| Astraptres | LOHAMP | [4097] | 04-SRNP-3314  | 669[0n]bp |
| Astraptres | LOHAMP | [4098] | 03-SRNP-3139  | 633[0n]bp |
| Astraptres | LOHAMP | [4099] | 04-SRNP-61342 | 633[0n]bp |
| Astraptres | LOHAMP | [4100] | 04-SRNP-56771 | 633[0n]bp |
| Astraptres | LOHAMP | [4101] | 03-SRNP-15889 | 633[0n]bp |
| Astraptres | LOHAMP | [4102] | 06-SRNP-36052 | 651[0n]bp |
| Astraptres | LOHAMP | [4103] | 06-SRNP-6884  | 651[0n]bp |
| Astraptres | LOHAMP | [4104] | 08-SRNP-35977 | 669[0n]bp |
| Astraptres | LOHAMP | [4105] | 08-SRNP-35969 | 669[0n]bp |
| Astraptres | LOHAMP | [4106] | 08-SRNP-35978 | 669[0n]bp |
| Astraptres | LOHAMP | [4107] | 08-SRNP-72414 | 669[0n]bp |
| Astraptres | LOHAMP | [4108] | 08-SRNP-35033 | 669[0n]bp |
| Astraptres | LOHAMP | [4109] | 08-SRNP-21411 | 669[0n]bp |
| Astraptres | LOHAMP | [4110] | 08-SRNP-35306 | 669[0n]bp |
| Astraptres | LOHAMP | [4111] | 07-SRNP-36287 | 669[0n]bp |
| Astraptres | LOHAMP | [4112] | 07-SRNP-3020  | 669[0n]bp |
| Astraptres | LOHAMP | [4113] | 07-SRNP-42071 | 669[0n]bp |
| Astraptres | LOHAMP | [4114] | 07-SRNP-36173 | 669[0n]bp |
| Astraptres | LOHAMP | [4115] | 07-SRNP-35819 | 669[0n]bp |
| Astraptres | LOHAMP | [4116] | 07-SRNP-35848 | 669[0n]bp |
| Astraptres | LOHAMP | [4117] | 07-SRNP-42123 | 669[0n]bp |
| Astraptres | LOHAMP | [4118] | 07-SRNP-35826 | 669[0n]bp |
| Astraptres | LOHAMP | [4119] | 07-SRNP-35754 | 669[0n]bp |
| Astraptres | LOHAMP | [4120] | 07-SRNP-35755 | 669[0n]bp |
| Astraptres | LOHAMP | [4121] | 07-SRNP-35709 | 669[0n]bp |
| Astraptres | LOHAMP | [4122] | 07-SRNP-697   | 669[0n]bp |
| Astraptres | LOHAMP | [4123] | 07-SRNP-1983  | 669[0n]bp |
| Astraptres | LOHAMP | [4124] | 07-SRNP-35414 | 669[0n]bp |
| Astraptres | LOHAMP | [4125] | 06-SRNP-65614 | 669[0n]bp |
| Astraptres | LOHAMP | [4126] | 07-SRNP-35525 | 669[0n]bp |
| Astraptres | LOHAMP | [4127] | 07-SRNP-1211  | 669[0n]bp |
| Astraptres | LOHAMP | [4128] | 07-SRNP-1467  | 669[0n]bp |
| Astraptres | LOHAMP | [4129] | 06-SRNP-36758 | 669[0n]bp |
| Astraptres | LOHAMP | [4130] | 06-SRNP-36094 | 669[0n]bp |
| Astraptres | LOHAMP | [4131] | 06-SRNP-36941 | 669[0n]bp |
| Astraptres | LOHAMP | [4132] | 06-SRNP-36618 | 669[0n]bp |
| Astraptres | LOHAMP | [4133] | 06-SRNP-36087 | 669[0n]bp |
| Astraptres | LOHAMP | [4134] | 06-SRNP-36707 | 669[0n]bp |
| Astraptres | LOHAMP | [4135] | 06-SRNP-47853 | 669[0n]bp |
| Astraptres | LOHAMP | [4136] | 06-SRNP-36541 | 669[0n]bp |
| Astraptres | LOHAMP | [4137] | 06-SRNP-36616 | 669[0n]bp |
| Astraptres | LOHAMP | [4138] | 06-SRNP-36544 | 669[0n]bp |
| Astraptres | LOHAMP | [4139] | 06-SRNP-36237 | 669[0n]bp |
| Astraptres | LOHAMP | [4140] | 07-SRNP-35045 | 669[0n]bp |
| Astraptres | LOHAMP | [4141] | 07-SRNP-35040 | 669[0n]bp |
| Astraptres | LOHAMP | [4142] | 06-SRNP-35627 | 669[0n]bp |
| Astraptres | LOHAMP | [4143] | 06-SRNP-35607 | 669[0n]bp |
| Astraptres | LOHAMP | [4144] | 06-SRNP-35688 | 669[0n]bp |
| Astraptres | LOHAMP | [4145] | 06-SRNP-35628 | 669[0n]bp |
| Astraptres | LOHAMP | [4146] | 06-SRNP-35619 | 669[0n]bp |
| Astraptres | LOHAMP | [4147] | 06-SRNP-35710 | 669[0n]bp |
| Astraptres | LOHAMP | [4148] | 06-SRNP-9530  | 669[0n]bp |
| Astraptres | LOHAMP | [4149] | 06-SRNP-6234  | 669[0n]bp |
| Astraptres | LOHAMP | [4150] | 06-SRNP-21646 | 669[0n]bp |
| Astraptres | LOHAMP | [4151] | 06-SRNP-9420  | 669[0n]bp |
| Astraptres | LOHAMP | [4152] | 06-SRNP-23242 | 669[0n]bp |
| Astraptres | LOHAMP | [4153] | 06-SRNP-6037  | 669[0n]bp |
| Astraptres | LOHAMP | [4154] | 06-SRNP-6038  | 669[0n]bp |
| Astraptres | LOHAMP | [4155] | 06-SRNP-47681 | 669[0n]bp |
| Astraptres | LOHAMP | [4156] | 06-SRNP-7042  | 669[0n]bp |
| Astraptres | LOHAMP | [4157] | 06-SRNP-5587  | 669[0n]bp |
| Astraptres | LOHAMP | [4158] | 06-SRNP-6933  | 669[0n]bp |
| Astraptres | LOHAMP | [4159] | 06-SRNP-8178  | 669[0n]bp |
| Astraptres | LOHAMP | [4160] | 06-SRNP-9171  | 669[0n]bp |
| Astraptres | LOHAMP | [4161] | 06-SRNP-8076  | 669[0n]bp |
| Astraptres | LOHAMP | [4162] | 06-SRNP-35562 | 669[0n]bp |
| Astraptres | LOHAMP | [4163] | 06-SRNP-4848  | 669[0n]bp |
| Astraptres | LOHAMP | [4164] | 04-SRNP-35126 | 669[0n]bp |
| Astraptres | LOHAMP | [4165] | 04-SRNP-35127 | 669[0n]bp |
| Astraptres | LOHAMP | [4166] | 04-SRNP-35162 | 669[0n]bp |
| Astraptres | LOHAMP | [4167] | 04-SRNP-35149 | 669[0n]bp |
| Astraptres | LOHAMP | [4168] | 04-SRNP-46671 | 669[0n]bp |
| Astraptres | LOHAMP | [4169] | 04-SRNP-50042 | 669[0n]bp |
| Astraptres | LOHAMP | [4170] | 04-SRNP-49891 | 669[0n]bp |
| Astraptres | LOHAMP | [4171] | 04-SRNP-60810 | 669[0n]bp |
| Astraptres | LOHAMP | [4172] | 04-SRNP-55659 | 669[0n]bp |
| Astraptres | LOHAMP | [4173] | 04-SRNP-56335 | 669[0n]bp |
| Astraptres | LOHAMP | [4174] | 04-SRNP-61002 | 669[0n]bp |
| Astraptres | LOHAMP | [4175] | 04-SRNP-60550 | 669[0n]bp |
| Astraptres | LOHAMP | [4176] | 04-SRNP-61012 | 669[0n]bp |
| Astraptres | LOHAMP | [4177] | 04-SRNP-60933 | 669[0n]bp |
| Astraptres | LOHAMP | [4178] | 04-SRNP-36186 | 669[0n]bp |
| Astraptres | LOHAMP | [4179] | 04-SRNP-36170 | 669[0n]bp |
| Astraptres | LOHAMP | [4180] | 03-SRNP-22299 | 669[0n]bp |
| Astraptres | LOHAMP | [4181] | 03-SRNP-3138  | 669[0n]bp |
| Astraptres | LOHAMP | [4182] | 03-SRNP-3509  | 669[0n]bp |
| Astraptres | LOHAMP | [4183] | 03-SRNP-3100  | 669[0n]bp |
| Astraptres | LOHAMP | [4184] | 03-SRNP-4933  | 669[0n]bp |
| Astraptres | LOHAMP | [4185] | 03-SRNP-4776  | 669[0n]bp |
| Astraptres | LOHAMP | [4186] | 03-SRNP-4281  | 669[0n]bp |
| Astraptres | LOHAMP | [4187] | 03-SRNP-4252  | 669[0n]bp |
| Astraptres | LOHAMP | [4188] | 03-SRNP-4410  | 669[0n]bp |
| Astraptres | LOHAMP | [4189] | 03-SRNP-6959  | 669[0n]bp |
| Astraptres | LOHAMP | [4190] | 03-SRNP-7550  | 669[0n]bp |
| Astraptres | LOHAMP | [4191] | 04-SRNP-40265 | 669[0n]bp |
| Astraptres | LOHAMP | [4192] | 03-SRNP-4699  | 669[0n]bp |
| Astraptres | LOHAMP | [4193] | 03-SRNP-3193  | 669[0n]bp |
| Astraptres | LOHAMP | [4194] | 03-SRNP-3258  | 669[0n]bp |
| Astraptres | LOHAMP | [4195] | 03-SRNP-5544  | 669[0n]bp |
| Astraptres | LOHAMP | [4196] | 03-SRNP-7135  | 669[0n]bp |
| Astraptres | LOHAMP | [4197] | 03-SRNP-3112  | 669[0n]bp |
| Astraptres | LOHAMP | [4198] | 03-SRNP-3343  | 669[0n]bp |
| Astraptres | LOHAMP | [4199] | 03-SRNP-10879 | 669[0n]bp |

|            |        |        |               |           |
|------------|--------|--------|---------------|-----------|
| Astrapttes | LOHAMP | [4197] | 03-SRNP-3112  | 669[0n]bp |
| Astrapttes | LOHAMP | [4198] | 03-SRNP-3343  | 669[0n]bp |
| Astrapttes | LOHAMP | [4199] | 03-SRNP-10879 | 669[0n]bp |
| Astrapttes | LOHAMP | [4200] | 03-SRNP-6958  | 669[0n]bp |
| Astrapttes | LOHAMP | [4201] | 06-SRNP-35048 | 669[0n]bp |
| Astrapttes | LOHAMP | [4202] | 06-SRNP-35127 | 669[0n]bp |
| Astrapttes | LOHAMP | [4203] | 04-SRNP-36231 | 669[0n]bp |
| Astrapttes | LOHAMP | [4204] | 05-SRNP-41118 | 669[0n]bp |
| Astrapttes | LOHAMP | [4205] | 04-SRNP-35980 | 669[0n]bp |
| Astrapttes | LOHAMP | [4206] | 05-SRNP-350   | 669[0n]bp |
| Astrapttes | LOHAMP | [4207] | 05-SRNP-35593 | 669[0n]bp |
| Astrapttes | LOHAMP | [4208] | 04-SRNP-56334 | 669[0n]bp |
| Astrapttes | LOHAMP | [4209] | 05-SRNP-231   | 669[0n]bp |
| Astrapttes | LOHAMP | [4210] | 07-SRNP-35931 | 666[0n]bp |
| Astrapttes | LOHAMP | [4211] | 07-SRNP-40830 | 666[0n]bp |
| Astrapttes | LOHAMP | [4212] | 06-SRNP-36607 | 666[0n]bp |
| Astrapttes | LOHAMP | [4213] | 07-SRNP-35002 | 666[0n]bp |
| Astrapttes | LOHAMP | [4214] | 06-SRNP-42492 | 666[0n]bp |
| Astrapttes | LOHAMP | [4215] | 06-SRNP-42491 | 666[0n]bp |
| Astrapttes | LOHAMP | [4216] | 04-SRNP-35218 | 666[0n]bp |
| Astrapttes | LOHAMP | [4217] | 04-SRNP-35559 | 666[0n]bp |
| Astrapttes | LOHAMP | [4218] | 03-SRNP-23253 | 666[0n]bp |
| Astrapttes | LOHAMP | [4219] | 03-SRNP-3354  | 666[0n]bp |
| Astrapttes | LOHAMP | [4220] | 03-SRNP-4998  | 666[0n]bp |
| Astrapttes | LOHAMP | [4221] | 03-SRNP-4369  | 666[0n]bp |
| Astrapttes | LOHAMP | [4222] | 03-SRNP-1331  | 666[0n]bp |
| Astrapttes | LOHAMP | [4223] | 04-SRNP-35877 | 666[0n]bp |
| Astrapttes | LOHAMP | [4224] | 04-SRNP-35875 | 666[0n]bp |
| Astrapttes | LOHAMP | [4225] | 04-SRNP-35694 | 666[0n]bp |
| Astrapttes | LOHAMP | [4226] | 04-SRNP-3509  | 666[0n]bp |
| Astrapttes | LOHAMP | [4227] | 04-SRNP-35873 | 666[0n]bp |
| Astrapttes | LOHAMP | [4228] | 04-SRNP-3852  | 666[0n]bp |
| Astrapttes | LOHAMP | [4229] | 04-SRNP-35321 | 666[0n]bp |
| Astrapttes | LOHAMP | [4230] | 04-SRNP-35170 | 666[0n]bp |
| Astrapttes | LOHAMP | [4231] | 04-SRNP-46672 | 666[0n]bp |
| Astrapttes | LOHAMP | [4232] | 04-SRNP-35683 | 666[0n]bp |
| Astrapttes | LOHAMP | [4233] | 04-SRNP-35449 | 666[0n]bp |
| Astrapttes | LOHAMP | [4234] | 04-SRNP-35500 | 666[0n]bp |
| Astrapttes | LOHAMP | [4235] | 04-SRNP-35346 | 666[0n]bp |
| Astrapttes | LOHAMP | [4236] | 04-SRNP-35269 | 666[0n]bp |
| Astrapttes | LOHAMP | [4237] | 04-SRNP-35395 | 666[0n]bp |
| Astrapttes | LOHAMP | [4238] | 04-SRNP-35343 | 666[0n]bp |
| Astrapttes | LOHAMP | [4239] | 04-SRNP-35436 | 666[0n]bp |
| Astrapttes | LOHAMP | [4240] | 03-SRNP-23619 | 666[0n]bp |
| Astrapttes | LOHAMP | [4241] | 03-SRNP-4294  | 666[0n]bp |
| Astrapttes | LOHAMP | [4242] | 03-SRNP-6225  | 666[0n]bp |
| Astrapttes | LOHAMP | [4243] | 03-SRNP-13031 | 666[0n]bp |
| Astrapttes | LOHAMP | [4244] | 03-SRNP-31151 | 666[0n]bp |
| Astrapttes | LOHAMP | [4245] | 03-SRNP-23573 | 666[0n]bp |
| Astrapttes | LOHAMP | [4246] | 03-SRNP-22087 | 666[0n]bp |
| Astrapttes | LOHAMP | [4247] | 06-SRNP-35022 | 666[0n]bp |
| Astrapttes | LOHAMP | [4248] | 04-SRNP-36163 | 666[0n]bp |
| Astrapttes | LOHAMP | [4249] | 05-SRNP-1602  | 666[0n]bp |
| Astrapttes | LOHAMP | [4250] | 04-SRNP-36230 | 666[0n]bp |
| Astrapttes | LOHAMP | [4251] | 05-SRNP-35006 | 666[0n]bp |
| Astrapttes | LOHAMP | [4252] | 04-SRNP-36185 | 666[0n]bp |
| Astrapttes | LOHAMP | [4253] | 07-SRNP-35003 | 666[0n]bp |
| Astrapttes | LOHAMP | [4254] | 06-SRNP-7285  | 663[0n]bp |
| Astrapttes | LOHAMP | [4255] | 07-SRNP-35593 | 663[0n]bp |
| Astrapttes | LOHAMP | [4256] | 06-SRNP-36339 | 627[1n]bp |
| Astrapttes | LOHAMP | [4257] | 07-SRNP-1982  | 654[0n]bp |
| Astrapttes | LOHAMP | [4258] | 04-SRNP-4381  | 654[0n]bp |
| Astrapttes | LOHAMP | [4259] | 00-SRNP-9957  | 651[0n]bp |
| Astrapttes | LOHAMP | [4260] | 01-SRNP-7375  | 651[0n]bp |
| Astrapttes | LOHAMP | [4261] | 02-SRNP-23196 | 651[0n]bp |
| Astrapttes | LOHAMP | [4262] | 02-SRNP-8010  | 651[0n]bp |
| Astrapttes | LOHAMP | [4263] | 01-SRNP-21272 | 651[0n]bp |
| Astrapttes | LOHAMP | [4264] | 02-SRNP-19946 | 651[0n]bp |
| Astrapttes | LOHAMP | [4265] | 02-SRNP-9906  | 651[0n]bp |
| Astrapttes | LOHAMP | [4266] | 02-SRNP-19945 | 651[0n]bp |
| Astrapttes | LOHAMP | [4267] | 02-SRNP-9775  | 651[0n]bp |
| Astrapttes | LOHAMP | [4268] | 02-SRNP-7893  | 651[0n]bp |
| Astrapttes | LOHAMP | [4269] | 02-SRNP-9769  | 651[0n]bp |
| Astrapttes | LOHAMP | [4270] | 02-SRNP-19727 | 651[0n]bp |
| Astrapttes | LOHAMP | [4271] | 02-SRNP-7856  | 651[0n]bp |
| Astrapttes | LOHAMP | [4272] | 02-SRNP-23086 | 651[0n]bp |
| Astrapttes | LOHAMP | [4273] | 02-SRNP-23926 | 651[0n]bp |
| Astrapttes | LOHAMP | [4274] | 02-SRNP-19182 | 651[0n]bp |
| Astrapttes | LOHAMP | [4275] | 01-SRNP-6254  | 651[0n]bp |
| Astrapttes | LOHAMP | [4276] | 98-SRNP-2129  | 651[0n]bp |
| Astrapttes | LOHAMP | [4277] | 97-SRNP-804   | 651[0n]bp |
| Astrapttes | LOHAMP | [4278] | 98-SRNP-2071  | 651[0n]bp |
| Astrapttes | LOHAMP | [4279] | 01-SRNP-21069 | 651[0n]bp |
| Astrapttes | LOHAMP | [4280] | 98-SRNP-2132  | 651[0n]bp |
| Astrapttes | LOHAMP | [4281] | 98-SRNP-6256  | 651[0n]bp |
| Astrapttes | LOHAMP | [4282] | 98-SRNP-6331  | 651[0n]bp |
| Astrapttes | LOHAMP | [4283] | 98-SRNP-2607  | 651[0n]bp |
| Astrapttes | LOHAMP | [4284] | 94-SRNP-10101 | 651[0n]bp |
| Astrapttes | LOHAMP | [4285] | 99-SRNP-17142 | 651[0n]bp |
| Astrapttes | LOHAMP | [4286] | 99-SRNP-17117 | 651[0n]bp |
| Astrapttes | LOHAMP | [4287] | 97-SRNP-795   | 651[0n]bp |
| Astrapttes | LOHAMP | [4288] | 99-SRNP-17030 | 651[0n]bp |
| Astrapttes | LOHAMP | [4289] | 99-SRNP-17039 | 651[0n]bp |
| Astrapttes | LOHAMP | [4290] | 00-SRNP-11876 | 651[0n]bp |
| Astrapttes | LOHAMP | [4291] | 99-SRNP-1893  | 651[0n]bp |
| Astrapttes | LOHAMP | [4292] | 00-SRNP-11725 | 651[0n]bp |
| Astrapttes | LOHAMP | [4293] | 99-SRNP-17192 | 651[0n]bp |
| Astrapttes | LOHAMP | [4294] | 96-SRNP-7037  | 651[0n]bp |
| Astrapttes | LOHAMP | [4295] | 95-SRNP-244   | 651[0n]bp |
| Astrapttes | LOHAMP | [4296] | 02-SRNP-9525  | 651[0n]bp |
| Astrapttes | LOHAMP | [4297] | 05-SRNP-2170  | 648[0n]bp |
| Astrapttes | LOHAMP | [4298] | 07-SRNP-45889 | 648[0n]bp |
| Astrapttes | LOHAMP | [4299] | 99-SRNP-1403  | 642[0n]bp |

```

Astraptles LOHAMP [4297] 05-SRNP-21701048[0n]bp
Astraptles LOHAMP [4298] 07-SRNP-45889|648[0n]bp
Astraptles LOHAMP [4299] 99-SRNP-1403|642[0n]bp
Astraptles LOHAMP [4300] 97-SRNP-1898|639[0n]bp
Astraptles LOHAMP [4301] 97-SRNP-6178|639[0n]bp
Astraptles LOHAMP [4302] 97-SRNP-6757|648[0n]bp
Astraptles LOHAMP [4303] 95-SRNP-3651|648[0n]bp
Astraptles LOHAMP [4304] 95-SRNP-867|648[0n]bp
Astraptles LOHAMP [4305] 06-SRNP-36701|624[0n]bp
Astraptles LOHAMP [4306] 06-SRNP-36231|624[0n]bp
Astraptles LOHAMP [4307] 04-SRNP-36169|666[0n]bp
Astraptles LOHAMP [4308] 05-SRNP-40961|669[0n]bp
Astraptles LOHAMP [4309] 06-SRNP-7520|669[0n]bp
Astraptles LOHAMP [4310] 06-SRNP-35608|669[0n]bp
Astraptles LOHAMP [4311] 06-SRNP-36679|669[0n]bp
Astraptles LOHAMP [4312] 07-SRNP-30949|669[0n]bp
Astraptles LOHAMP [4313] 07-SRNP-2787|669[0n]bp
Astraptles LOHAMP [4314] 07-SRNP-2858|669[0n]bp
Astraptles LOHAMP [4315] 08-SRNP-71001|669[0n]bp
Astraptles LOHAMP [4316] 08-SRNP-35886|669[0n]bp
Astraptles LOHAMP [4317] 08-SRNP-5784|669[0n]bp
Astraptles LOHAMP [4318] 09-SRNP-69238|669[0n]bp
Astraptles LOHAMP [4319] 09-SRNP-72074|669[0n]bp
Astraptles LOHAMP [4320] 09-SRNP-35515|669[0n]bp
Astraptles LOHAMP [4321] 09-SRNP-41801|669[0n]bp
Astraptles YESENN [4322] 98-SRNP-27131|600[4n]bp
Astraptles YESENN [4323] 03-SRNP-9129|666[0n]bp
Astraptles YESENN [4324] 05-SRNP-1745|666[0n]bp
Astraptles YESENN [4325] 03-SRNP-22479|666[0n]bp
Astraptles YESENN [4326] 06-SRNP-31612|669[0n]bp
Astraptles YESENN [4327] 07-SRNP-1716|669[0n]bp
Astraptles YESENN [4328] 07-SRNP-1714|669[0n]bp
Astraptles YESENN [4329] 08-SRNP-1634|669[0n]bp
Astraptles YESENN [4330] 08-SRNP-1633|669[0n]bp
Astraptles YESENN [4331] 95-SRNP-512|651[1n]bp
Astraptles YESENN [4332] 02-SRNP-9495|651[1n]bp
Astraptles YESENN [4333] 95-SRNP-840|651[1n]bp
Astraptles YESENN [4334] 07-SRNP-23723|618[0n]bp
Astraptles YESENN [4335] 05-SRNP-2389|669[0n]bp
Astraptles YESENN [4336] 98-SRNP-14616|651[0n]bp
Astraptles YESENN [4337] 02-SRNP-21442|651[0n]bp
Astraptles YESENN [4338] 03-SRNP-5145|666[0n]bp
Astraptles YESENN [4339] 06-SRNP-34242|669[0n]bp
Astraptles YESENN [4340] 04-SRNP-48269|669[0n]bp
Astraptles YESENN [4341] 03-SRNP-3194|669[1n]bp
Astraptles YESENN [4342] 02-SRNP-9939|618[0n]bp
Astraptles YESENN [4343] 98-SRNP-7982|609[0n]bp
Astraptles YESENN [4344] 06-SRNP-45979|657[0n]bp
Astraptles YESENN [4345] 95-SRNP-4551|420[0n]bp
Astraptles YESENN [4346] 99-SRNP-302|651[0n]bp
Astraptles YESENN [4347] 04-SRNP-46518|642[1n]bp
Astraptles YESENN [4348] 04-SRNP-46751|642[1n]bp
Astraptles YESENN [4349] 95-SRNP-858|591[0n]bp
Astraptles YESENN [4350] 03-SRNP-15877|669[0n]bp
Astraptles YESENN [4351] 08-SRNP-36525|669[0n]bp
Astraptles YESENN [4352] 08-SRNP-36993|669[0n]bp
Astraptles YESENN [4353] 08-SRNP-2398|669[0n]bp
Astraptles YESENN [4354] 08-SRNP-2397|669[0n]bp
Astraptles YESENN [4355] 07-SRNP-23843|669[0n]bp
Astraptles YESENN [4356] 08-SRNP-65542|669[0n]bp
Astraptles YESENN [4357] 07-SRNP-45395|669[0n]bp
Astraptles YESENN [4358] 07-SRNP-65880|669[0n]bp
Astraptles YESENN [4359] 07-SRNP-45394|669[0n]bp
Astraptles YESENN [4360] 07-SRNP-45298|669[0n]bp
Astraptles YESENN [4361] 07-SRNP-21700|669[0n]bp
Astraptles YESENN [4362] 07-SRNP-36004|669[0n]bp
Astraptles YESENN [4363] 06-SRNP-65728|669[0n]bp
Astraptles YESENN [4364] 07-SRNP-1339|669[0n]bp
Astraptles INGCUP [4365] 06-SRNP-7673|669[0n]bp
Astraptles YESENN [4366] 06-SRNP-7197|669[0n]bp
Astraptles YESENN [4367] 06-SRNP-45902|669[0n]bp
Astraptles YESENN [4368] 06-SRNP-7523|669[0n]bp
Astraptles YESENN [4369] 03-SRNP-12813.1|669[0n]bp
Astraptles YESENN [4370] 03-SRNP-20867|669[0n]bp
Astraptles YESENN [4371] 03-SRNP-20900|669[0n]bp
Astraptles YESENN [4372] 03-SRNP-31190|669[0n]bp
Astraptles YESENN [4373] 03-SRNP-9131|669[0n]bp
Astraptles YESENN [4374] 03-SRNP-13054.1|669[0n]bp
Astraptles YESENN [4375] 03-SRNP-19233|669[0n]bp
Astraptles YESENN [4376] 03-SRNP-21719|669[0n]bp
Astraptles YESENN [4377] 03-SRNP-20039|669[0n]bp
Astraptles YESENN [4378] 03-SRNP-12396.1|669[0n]bp
Astraptles YESENN [4379] 03-SRNP-5830|669[0n]bp
Astraptles YESENN [4380] 03-SRNP-18629|669[0n]bp
Astraptles YESENN [4381] 03-SRNP-19981|669[0n]bp
Astraptles YESENN [4382] 03-SRNP-12811.1|669[0n]bp
Astraptles YESENN [4383] 06-SRNP-2596|669[0n]bp
Astraptles YESENN [4384] 03-SRNP-19923|669[0n]bp
Astraptles YESENN [4385] 06-SRNP-35002|669[0n]bp
Astraptles YESENN [4386] 05-SRNP-343|669[0n]bp
Astraptles YESENN [4387] 05-SRNP-46248|669[0n]bp
Astraptles YESENN [4388] 05-SRNP-46247|669[0n]bp
Astraptles YESENN [4389] 05-SRNP-23710|669[1n]bp
Astraptles YESENN [4390] 07-SRNP-1582|666[0n]bp
Astraptles YESENN [4391] 04-SRNP-46657|666[0n]bp
Astraptles YESENN [4392] 04-SRNP-46761|666[0n]bp
Astraptles YESENN [4393] 03-SRNP-29977|666[0n]bp
Astraptles YESENN [4394] 03-SRNP-19925|666[0n]bp
Astraptles YESENN [4395] 04-SRNP-61087|666[0n]bp
Astraptles YESENN [4396] 04-SRNP-42351|666[0n]bp
Astraptles YESENN [4397] 04-SRNP-21144|666[0n]bp
Astraptles YESENN [4398] 03-SRNP-17617|666[0n]bp
Astraptles YESENN [4399] 03-SRNP-19500|666[0n]bp

```

|           |        |        |                 |     |      |    |
|-----------|--------|--------|-----------------|-----|------|----|
| Astraptes | YESENN | [437]  | 04-SRNP-21144   | 666 | [0n] | bp |
| Astraptes | YESENN | [4398] | 03-SRNP-17617   | 666 | [0n] | bp |
| Astraptes | YESENN | [4399] | 03-SRNP-19500   | 666 | [0n] | bp |
| Astraptes | YESENN | [4400] | 03-SRNP-11292   | 666 | [0n] | bp |
| Astraptes | YESENN | [4401] | 03-SRNP-11291   | 666 | [0n] | bp |
| Astraptes | YESENN | [4402] | 03-SRNP-13084.1 | 666 | [0n] | bp |
| Astraptes | YESENN | [4403] | 03-SRNP-31311   | 666 | [0n] | bp |
| Astraptes | YESENN | [4404] | 04-SRNP-56956   | 669 | [0n] | bp |
| Astraptes | YESENN | [4405] | 04-SRNP-56955   | 669 | [0n] | bp |
| Astraptes | YESENN | [4406] | 03-SRNP-31192   | 666 | [0n] | bp |
| Astraptes | YESENN | [4407] | 06-SRNP-46048   | 669 | [0n] | bp |
| Astraptes | YESENN | [4408] | 03-SRNP-8219    | 666 | [0n] | bp |
| Astraptes | YESENN | [4409] | 03-SRNP-21599   | 666 | [0n] | bp |
| Astraptes | YESENN | [4410] | 05-SRNP-2166    | 669 | [0n] | bp |
| Astraptes | YESENN | [4411] | 06-SRNP-35000   | 669 | [0n] | bp |
| Astraptes | YESENN | [4412] | 06-SRNP-2689    | 666 | [0n] | bp |
| Astraptes | YESENN | [4413] | 07-SRNP-3219    | 669 | [0n] | bp |
| Astraptes | YESENN | [4414] | 06-SRNP-35003   | 666 | [0n] | bp |
| Astraptes | YESENN | [4415] | 01-SRNP-9652    | 651 | [0n] | bp |
| Astraptes | YESENN | [4416] | 07-SRNP-31395   | 669 | [0n] | bp |
| Astraptes | YESENN | [4417] | 06-SRNP-7000    | 660 | [0n] | bp |
| Astraptes | YESENN | [4418] | 00-SRNP-11880   | 651 | [0n] | bp |
| Astraptes | YESENN | [4419] | 99-SRNP-3015    | 651 | [0n] | bp |
| Astraptes | YESENN | [4420] | 02-SRNP-30212   | 651 | [0n] | bp |
| Astraptes | YESENN | [4421] | 02-SRNP-30211   | 651 | [0n] | bp |
| Astraptes | YESENN | [4422] | 00-SRNP-11188   | 651 | [0n] | bp |
| Astraptes | YESENN | [4423] | 94-SRNP-9330    | 651 | [0n] | bp |
| Astraptes | YESENN | [4424] | 02-SRNP-19308   | 651 | [0n] | bp |
| Astraptes | YESENN | [4425] | 98-SRNP-6561    | 651 | [0n] | bp |
| Astraptes | YESENN | [4426] | 02-SRNP-31858   | 651 | [0n] | bp |
| Astraptes | YESENN | [4427] | 02-SRNP-29805   | 651 | [0n] | bp |
| Astraptes | YESENN | [4428] | 02-SRNP-30062   | 651 | [0n] | bp |
| Astraptes | YESENN | [4429] | 02-SRNP-33820   | 651 | [0n] | bp |
| Astraptes | YESENN | [4430] | 02-SRNP-30059   | 651 | [0n] | bp |
| Astraptes | YESENN | [4431] | 02-SRNP-20190   | 651 | [0n] | bp |
| Astraptes | YESENN | [4432] | 02-SRNP-21384   | 651 | [0n] | bp |
| Astraptes | YESENN | [4433] | 99-SRNP-4820    | 651 | [0n] | bp |
| Astraptes | YESENN | [4434] | 99-SRNP-203     | 651 | [0n] | bp |
| Astraptes | YESENN | [4435] | 99-SRNP-11      | 651 | [0n] | bp |
| Astraptes | YESENN | [4436] | 99-SRNP-386     | 651 | [0n] | bp |
| Astraptes | YESENN | [4437] | 99-SRNP-12      | 651 | [0n] | bp |
| Astraptes | YESENN | [4438] | 99-SRNP-2446    | 651 | [0n] | bp |
| Astraptes | YESENN | [4439] | 01-SRNP-6896    | 651 | [0n] | bp |
| Astraptes | YESENN | [4440] | 01-SRNP-1047    | 651 | [0n] | bp |
| Astraptes | YESENN | [4441] | 00-SRNP-22164   | 651 | [0n] | bp |
| Astraptes | YESENN | [4442] | 02-SRNP-9496    | 651 | [0n] | bp |
| Astraptes | YESENN | [4443] | 98-SRNP-14632   | 651 | [4n] | bp |
| Astraptes | YESENN | [4444] | 03-SRNP-20899   | 645 | [0n] | bp |
| Astraptes | YESENN | [4445] | 02-SRNP-23365   | 642 | [0n] | bp |
| Astraptes | YESENN | [4446] | 98-SRNP-7874    | 639 | [0n] | bp |
| Astraptes | YESENN | [4447] | 99-SRNP-301     | 636 | [0n] | bp |
| Astraptes | YESENN | [4448] | 98-SRNP-4773    | 636 | [0n] | bp |
| Astraptes | YESENN | [4449] | 06-SRNP-41253   | 633 | [0n] | bp |
| Astraptes | YESENN | [4450] | 06-SRNP-35006   | 633 | [0n] | bp |
| Astraptes | YESENN | [4451] | 06-SRNP-45767   | 630 | [1n] | bp |
| Astraptes | YESENN | [4452] | 07-SRNP-42668   | 552 | [0n] | bp |
| Astraptes | YESENN | [4453] | 09-SRNP-57375   | 669 | [0n] | bp |
| Astraptes | YESENN | [4454] | 03-SRNP-19491   | 666 | [1n] | bp |
| Astraptes | YESENN | [4455] | 03-SRNP-1327    | 669 | [0n] | bp |
| Astraptes | YESENN | [4456] | 06-SRNP-45771   | 657 | [0n] | bp |
| Astraptes | YESENN | [4457] | 06-SRNP-3660    | 657 | [0n] | bp |
| Astraptes | YESENN | [4458] | 03-SRNP-12405.1 | 669 | [0n] | bp |
| Astraptes | YESENN | [4459] | 07-SRNP-23600   | 573 | [1n] | bp |
| Astraptes | YESENN | [4460] | 08-SRNP-1537    | 645 | [0n] | bp |
| Astraptes | YESENN | [4461] | 06-SRNP-5657    | 627 | [1n] | bp |
| Astraptes | YESENN | [4462] | 03-SRNP-7325    | 669 | [0n] | bp |
| Astraptes | YESENN | [4463] | 03-SRNP-19236   | 669 | [0n] | bp |
| Astraptes | YESENN | [4464] | 03-SRNP-16333   | 669 | [0n] | bp |
| Astraptes | YESENN | [4465] | 03-SRNP-16844   | 669 | [0n] | bp |
| Astraptes | YESENN | [4466] | 03-SRNP-30303   | 669 | [0n] | bp |
| Astraptes | YESENN | [4467] | 06-SRNP-43726   | 669 | [0n] | bp |
| Astraptes | YESENN | [4468] | 03-SRNP-12638.1 | 669 | [0n] | bp |
| Astraptes | YESENN | [4469] | 03-SRNP-37033   | 669 | [0n] | bp |
| Astraptes | YESENN | [4470] | 03-SRNP-19241   | 669 | [0n] | bp |
| Astraptes | YESENN | [4471] | 03-SRNP-20422   | 669 | [0n] | bp |
| Astraptes | YESENN | [4472] | 03-SRNP-15876   | 669 | [0n] | bp |
| Astraptes | YESENN | [4473] | 03-SRNP-4202    | 669 | [0n] | bp |
| Astraptes | YESENN | [4474] | 06-SRNP-35033   | 669 | [0n] | bp |
| Astraptes | YESENN | [4475] | 04-SRNP-27148   | 669 | [0n] | bp |
| Astraptes | YESENN | [4476] | 05-SRNP-41425   | 669 | [0n] | bp |
| Astraptes | YESENN | [4477] | 05-SRNP-23696   | 666 | [0n] | bp |
| Astraptes | YESENN | [4478] | 05-SRNP-23780   | 666 | [0n] | bp |
| Astraptes | YESENN | [4479] | 06-SRNP-2688    | 666 | [0n] | bp |
| Astraptes | YESENN | [4480] | 95-SRNP-4464    | 651 | [0n] | bp |
| Astraptes | YESENN | [4481] | 02-SRNP-33384   | 651 | [0n] | bp |
| Astraptes | YESENN | [4482] | 02-SRNP-31970   | 651 | [0n] | bp |
| Astraptes | YESENN | [4483] | 00-SRNP-20862   | 651 | [0n] | bp |
| Astraptes | YESENN | [4484] | 01-SRNP-9728    | 651 | [0n] | bp |
| Astraptes | YESENN | [4485] | 97-SRNP-6181    | 651 | [0n] | bp |
| Astraptes | YESENN | [4486] | 99-SRNP-4773    | 651 | [0n] | bp |
| Astraptes | YESENN | [4487] | 98-SRNP-15072   | 651 | [0n] | bp |
| Astraptes | YESENN | [4488] | 00-SRNP-10415   | 651 | [0n] | bp |
| Astraptes | YESENN | [4489] | 02-SRNP-17335   | 642 | [0n] | bp |
| Astraptes | YESENN | [4490] | 03-SRNP-19235   | 633 | [0n] | bp |
| Astraptes | YESENN | [4491] | 04-SRNP-30116   | 660 | [0n] | bp |
| Astraptes | YESENN | [4492] | 03-SRNP-21722   | 666 | [0n] | bp |
| Astraptes | YESENN | [4493] | 03-SRNP-21302   | 666 | [0n] | bp |
| Astraptes | YESENN | [4494] | 04-SRNP-47991   | 666 | [0n] | bp |
| Astraptes | YESENN | [4495] | 04-SRNP-56475   | 666 | [0n] | bp |
| Astraptes | YESENN | [4496] | 03-SRNP-11346   | 666 | [0n] | bp |
| Astraptes | YESENN | [4497] | 03-SRNP-2947    | 666 | [0n] | bp |
| Astraptes | YESENN | [4498] | 03-SRNP-31288   | 666 | [0n] | bp |
| Astraptes | YESENN | [4499] | 04-SRNP-45272   | 666 | [0n] | bp |

|           |        |        |               |           |
|-----------|--------|--------|---------------|-----------|
| Astraptes | YESENN | [4497] | 03-SRNP-2347  | 666[0n]bp |
| Astraptes | YESENN | [4498] | 03-SRNP-31288 | 666[0n]bp |
| Astraptes | YESENN | [4499] | 04-SRNP-45272 | 666[0n]bp |
| Astraptes | YESENN | [4500] | 06-SRNP-22582 | 666[0n]bp |
| Astraptes | YESENN | [4501] | 06-SRNP-7387  | 669[0n]bp |
| Astraptes | YESENN | [4502] | 06-SRNP-23309 | 669[0n]bp |
| Astraptes | YESENN | [4503] | 06-SRNP-23308 | 669[0n]bp |
| Astraptes | YESENN | [4504] | 06-SRNP-46392 | 669[0n]bp |
| Astraptes | YESENN | [4505] | 09-SRNP-21124 | 669[0n]bp |
| Astraptes | YESENN | [4506] | 09-SRNP-80729 | 669[0n]bp |
| Astraptes | YESENN | [4507] | 03-SRNP-1328  | 669[2n]bp |
| Astraptes | YESENN | [4508] | 99-SRNP-17158 | 651[1n]bp |
| Astraptes | YESENN | [4509] | 04-SRNP-35012 | 666[0n]bp |
| Astraptes | YESENN | [4510] | 02-SRNP-29803 | 651[0n]bp |
| Astraptes | YESENN | [4511] | 02-SRNP-18849 | 651[0n]bp |
| Astraptes | YESENN | [4512] | 02-SRNP-19921 | 651[0n]bp |
| Astraptes | YESENN | [4513] | 06-SRNP-33146 | 669[0n]bp |
| Astraptes | YESENN | [4514] | 07-SRNP-1583  | 645[0n]bp |
| Astraptes | YESENN | [4515] | 06-SRNP-46808 | 669[0n]bp |
| Astraptes | YESENN | [4516] | 06-SRNP-46810 | 669[0n]bp |
| Astraptes | YESENN | [4517] | 06-SRNP-21578 | 669[0n]bp |
| Astraptes | YESENN | [4518] | 06-SRNP-21607 | 669[0n]bp |
| Astraptes | YESENN | [4519] | 06-SRNP-22150 | 669[0n]bp |
| Astraptes | YESENN | [4520] | 06-SRNP-46491 | 669[0n]bp |
| Astraptes | YESENN | [4521] | 06-SRNP-43633 | 669[0n]bp |
| Astraptes | YESENN | [4522] | 06-SRNP-45450 | 669[0n]bp |
| Astraptes | YESENN | [4523] | 06-SRNP-2751  | 669[0n]bp |
| Astraptes | YESENN | [4524] | 04-SRNP-46943 | 669[0n]bp |
| Astraptes | YESENN | [4525] | 03-SRNP-12768 | 669[0n]bp |
| Astraptes | YESENN | [4526] | 03-SRNP-13044 | 669[0n]bp |
| Astraptes | YESENN | [4527] | 03-SRNP-31188 | 669[0n]bp |
| Astraptes | YESENN | [4528] | 03-SRNP-12300 | 666[0n]bp |
| Astraptes | YESENN | [4529] | 03-SRNP-28876 | 666[0n]bp |
| Astraptes | YESENN | [4530] | 03-SRNP-15893 | 666[0n]bp |
| Astraptes | YESENN | [4531] | 03-SRNP-5207  | 666[0n]bp |
| Astraptes | YESENN | [4532] | 03-SRNP-28260 | 666[1n]bp |
| Astraptes | YESENN | [4533] | 03-SRNP-19922 | 666[0n]bp |
| Astraptes | YESENN | [4534] | 03-SRNP-31295 | 666[0n]bp |
| Astraptes | YESENN | [4535] | 03-SRNP-13045 | 666[0n]bp |
| Astraptes | YESENN | [4536] | 03-SRNP-37165 | 666[0n]bp |
| Astraptes | YESENN | [4537] | 03-SRNP-18626 | 669[0n]bp |
| Astraptes | YESENN | [4538] | 98-SRNP-6537  | 651[0n]bp |
| Astraptes | YESENN | [4539] | 04-SRNP-46760 | 666[0n]bp |
| Astraptes | YESENN | [4540] | 05-SRNP-23548 | 666[0n]bp |
| Astraptes | YESENN | [4541] | 03-SRNP-28257 | 669[0n]bp |
| Astraptes | YESENN | [4542] | 03-SRNP-28256 | 666[0n]bp |
| Astraptes | YESENN | [4543] | 05-SRNP-65076 | 666[0n]bp |
| Astraptes | YESENN | [4544] | 06-SRNP-43453 | 657[0n]bp |
| Astraptes | YESENN | [4545] | 89-SRNP-112   | 651[0n]bp |
| Astraptes | YESENN | [4546] | 99-SRNP-155   | 651[0n]bp |
| Astraptes | YESENN | [4547] | 99-SRNP-4383  | 651[0n]bp |
| Astraptes | YESENN | [4548] | 00-SRNP-11805 | 651[0n]bp |
| Astraptes | YESENN | [4549] | 02-SRNP-19802 | 651[0n]bp |
| Astraptes | YESENN | [4550] | 02-SRNP-19922 | 651[0n]bp |
| Astraptes | YESENN | [4551] | 98-SRNP-7848  | 651[0n]bp |
| Astraptes | YESENN | [4552] | 01-SRNP-6800  | 651[0n]bp |
| Astraptes | YESENN | [4553] | 99-SRNP-4436  | 651[0n]bp |
| Astraptes | YESENN | [4554] | 98-SRNP-15015 | 651[0n]bp |
| Astraptes | YESENN | [4555] | 97-SRNP-6252  | 651[0n]bp |
| Astraptes | YESENN | [4556] | 98-SRNP-2712  | 651[0n]bp |
| Astraptes | YESENN | [4557] | 00-SRNP-22003 | 651[0n]bp |
| Astraptes | YESENN | [4558] | 98-SRNP-6332  | 651[0n]bp |
| Astraptes | YESENN | [4559] | 99-SRNP-525   | 651[0n]bp |
| Astraptes | YESENN | [4560] | 95-SRNP-4402  | 648[0n]bp |
| Astraptes | YESENN | [4561] | 99-SRNP-524   | 642[0n]bp |
| Astraptes | YESENN | [4562] | 99-SRNP-4418  | 639[0n]bp |
| Astraptes | YESENN | [4563] | 99-SRNP-2444  | 639[0n]bp |
| Astraptes | YESENN | [4564] | 06-SRNP-7361  | 639[0n]bp |
| Astraptes | YESENN | [4565] | 06-SRNP-47922 | 618[0n]bp |
| Astraptes | YESENN | [4566] | 07-SRNP-1266  | 666[0n]bp |
| Astraptes | YESENN | [4567] | 07-SRNP-42069 | 669[0n]bp |
| Astraptes | YESENN | [4568] | 07-SRNP-65846 | 669[0n]bp |
| Astraptes | YESENN | [4569] | 08-SRNP-2539  | 669[0n]bp |
| Astraptes | YESENN | [4570] | 09-SRNP-2732  | 669[0n]bp |
| Astraptes | YESENN | [4571] | 06-SRNP-7524  | 669[0n]bp |
| Astraptes | YESENN | [4572] | 06-SRNP-7624  | 669[0n]bp |
| Astraptes | YESENN | [4573] | 06-SRNP-46103 | 669[0n]bp |
| Astraptes | YESENN | [4574] | 04-SRNP-47834 | 666[0n]bp |
| Astraptes | YESENN | [4575] | 03-SRNP-19933 | 666[0n]bp |
| Astraptes | YESENN | [4576] | 06-SRNP-5658  | 663[0n]bp |
| Astraptes | YESENN | [4577] | 93-SRNP-3364  | 651[0n]bp |
| Astraptes | YESENN | [4578] | 03-SRNP-23561 | 666[0n]bp |
| Astraptes | YESENN | [4579] | 99-SRNP-402   | 651[0n]bp |
| Astraptes | YESENN | [4580] | 06-SRNP-5995  | 642[0n]bp |
| Astraptes | YESENN | [4581] | 06-SRNP-22572 | 669[0n]bp |
| Astraptes | YESENN | [4582] | 09-SRNP-20756 | 669[0n]bp |
| Astraptes | LONCHO | [4583] | 04-SRNP-35659 | 642[0n]bp |
| Astraptes | LONCHO | [4584] | 97-SRNP-721   | 651[0n]bp |
| Astraptes | LONCHO | [4585] | 04-SRNP-35510 | 570[1n]bp |
| Astraptes | LONCHO | [4586] | 02-SRNP-8471  | 558[1n]bp |
| Astraptes | LONCHO | [4587] | 02-SRNP-9547  | 612[0n]bp |
| Astraptes | LONCHO | [4588] | 02-SRNP-8068  | 621[0n]bp |
| Astraptes | LONCHO | [4589] | 02-SRNP-8361  | 558[1n]bp |
| Astraptes | LONCHO | [4590] | 02-SRNP-8165  | 558[1n]bp |
| Astraptes | LONCHO | [4591] | 97-SRNP-840   | 651[0n]bp |
| Astraptes | LONCHO | [4592] | 04-SRNP-35270 | 540[1n]bp |
| Astraptes | LONCHO | [4593] | 04-SRNP-35660 | 666[0n]bp |
| Astraptes | LONCHO | [4594] | 03-SRNP-22396 | 660[0n]bp |
| Astraptes | LONCHO | [4595] | 06-SRNP-35047 | 660[0n]bp |
| Astraptes | LONCHO | [4596] | 00-SRNP-10977 | 651[0n]bp |
| Astraptes | LONCHO | [4597] | 02-SRNP-9135  | 651[0n]bp |
| Astraptes | LONCHO | [4598] | 98-SRNP-2703  | 651[0n]bp |
| Astraptes | LONCHO | [4599] | 00-SRNP-10502 | 651[0n]bp |

```

Astraptes LONCHO [4597] |02-SRNP-2155|651[0n]bp
Astraptes LONCHO [4598] |98-SRNP-2703|651[0n]bp
Astraptes LONCHO [4599] |00-SRNP-10502|651[0n]bp
Astraptes LONCHO [4600] |99-SRNP-17068|651[0n]bp
Astraptes LONCHO [4601] |01-SRNP-21505|651[0n]bp
Astraptes LONCHO [4602] |99-SRNP-17184|651[0n]bp
Astraptes LONCHO [4603] |02-SRNP-9976|651[0n]bp
Astraptes LONCHO [4604] |00-SRNP-10501|651[0n]bp
Astraptes LONCHO [4605] |00-SRNP-10500|651[0n]bp
Astraptes LONCHO [4606] |89-SRNP-736|651[0n]bp
Astraptes LONCHO [4607] |97-SRNP-1147|651[0n]bp
Astraptes LONCHO [4608] |97-SRNP-842|651[0n]bp
Astraptes LONCHO [4609] |02-SRNP-9448|651[0n]bp
Astraptes LONCHO [4610] |97-SRNP-1856|651[0n]bp
Astraptes LONCHO [4611] |02-SRNP-8281|651[0n]bp
Astraptes LONCHO [4612] |97-SRNP-724|651[0n]bp
Astraptes LONCHO [4613] |02-SRNP-8140|651[0n]bp
Astraptes LONCHO [4614] |97-SRNP-1127|651[0n]bp
Astraptes LONCHO [4615] |97-SRNP-755|651[0n]bp
Astraptes LONCHO [4616] |02-SRNP-8439|651[0n]bp
Astraptes LONCHO [4617] |00-SRNP-9539|651[0n]bp
Astraptes LONCHO [4618] |02-SRNP-8360|651[0n]bp
Astraptes LONCHO [4619] |97-SRNP-722|651[0n]bp
Astraptes LONCHO [4620] |00-SRNP-9040|651[0n]bp
Astraptes LONCHO [4621] |02-SRNP-8249|651[0n]bp
Astraptes LONCHO [4622] |02-SRNP-8343|651[0n]bp
Astraptes LONCHO [4623] |01-SRNP-21520|651[0n]bp
Astraptes LONCHO [4624] |97-SRNP-1050|651[0n]bp
Astraptes LONCHO [4625] |02-SRNP-8438|651[0n]bp
Astraptes LONCHO [4626] |97-SRNP-723|651[0n]bp
Astraptes LONCHO [4627] |97-SRNP-720|651[0n]bp
Astraptes LONCHO [4628] |02-SRNP-24219|633[0n]bp
Astraptes LONCHO [4629] |99-SRNP-17162|639[0n]bp
Astraptes LONCHO [4630] |07-SRNP-35892|669[0n]bp
Astraptes LONCHO [4631] |07-SRNP-36055|669[0n]bp
Astraptes LONCHO [4632] |07-SRNP-45518|669[0n]bp
Astraptes LONCHO [4633] |07-SRNP-36122|669[0n]bp
Astraptes LONCHO [4634] |08-SRNP-36242|669[0n]bp
Astraptes LONCHO [4635] |08-SRNP-35999|669[0n]bp
Astraptes LONCHO [4636] |04-SRNP-56583|669[0n]bp
Astraptes LONCHO [4637] |06-SRNP-35016|669[0n]bp
Astraptes LONCHO [4638] |09-SRNP-36882|669[0n]bp
Astraptes SENNOV [4639] |01-SRNP-2604|378[1n]bp
Astraptes SENNOV [4640] |91-SRNP-2454|558[6n]bp
Astraptes SENNOV [4641] |95-SRNP-4409|651[0n]bp
Astraptes SENNOV [4642] |05-SRNP-45060|669[0n]bp
Astraptes SENNOV [4643] |93-SRNP-3363|651[0n]bp
Astraptes SENNOV [4644] |92-SRNP-3975.1|651[0n]bp
Astraptes SENNOV [4645] |95-SRNP-6137|651[0n]bp
Astraptes SENNOV [4646] |93-SRNP-3377|651[0n]bp
Astraptes SENNOV [4647] |90-SRNP-1711|636[0n]bp
Astraptes SENNOV [4648] |92-SRNP-3975|651[0n]bp
Astraptes SENNOV [4649] |96-SRNP-10407|651[0n]bp
Astraptes SENNOV [4650] |99-SRNP-10683.1|651[0n]bp
Astraptes SENNOV [4651] |96-SRNP-10408|651[0n]bp
Astraptes SENNOV [4652] |94-SRNP-8089|651[0n]bp
Astraptes SENNOV [4653] |96-SRNP-10410|651[0n]bp
Astraptes SENNOV [4654] |96-SRNP-10409|651[0n]bp
Astraptes SENNOV [4655] |04-SRNP-30803|666[0n]bp
Astraptes SENNOV [4656] |91-SRNP-1741|651[0n]bp
Astraptes SENNOV [4657] |06-SRNP-19450|669[0n]bp
Astraptes SENNOV [4658] |99-SRNP-4144|651[0n]bp
Astraptes SENNOV [4659] |06-SRNP-31423|645[1n]bp
Astraptes SENNOV [4660] |93-SRNP-954|651[0n]bp
Astraptes SENNOV [4661] |93-SRNP-955|651[0n]bp
Astraptes SENNOV [4662] |95-SRNP-8555|651[1n]bp
Astraptes SENNOV [4663] |07-SRNP-45042|669[0n]bp
Astraptes SENNOV [4664] |07-SRNP-45041|669[0n]bp
Astraptes SENNOV [4665] |07-SRNP-45040|669[0n]bp
Astraptes SENNOV [4666] |07-SRNP-45043|669[0n]bp
Astraptes SENNOV [4667] |04-SRNP-46788|669[0n]bp
Astraptes SENNOV [4668] |06-SRNP-47119|669[0n]bp
Astraptes SENNOV [4669] |05-SRNP-60388|669[0n]bp
Astraptes SENNOV [4670] |04-SRNP-46986|669[0n]bp
Astraptes SENNOV [4671] |05-SRNP-47264|669[0n]bp
Astraptes SENNOV [4672] |05-SRNP-59407|669[0n]bp
Astraptes SENNOV [4673] |05-SRNP-46328|669[0n]bp
Astraptes SENNOV [4674] |05-SRNP-46845|669[0n]bp
Astraptes SENNOV [4675] |05-SRNP-46843|669[0n]bp
Astraptes SENNOV [4676] |05-SRNP-59544|669[0n]bp
Astraptes SENNOV [4677] |05-SRNP-57580|669[0n]bp
Astraptes SENNOV [4678] |06-SRNP-20364|669[0n]bp
Astraptes SENNOV [4679] |04-SRNP-48059|666[0n]bp
Astraptes SENNOV [4680] |05-SRNP-46846|666[0n]bp
Astraptes SENNOV [4681] |95-SRNP-4807|651[0n]bp
Astraptes SENNOV [4682] |99-SRNP-411|651[0n]bp
Astraptes SENNOV [4683] |98-SRNP-2714|651[0n]bp
Astraptes SENNOV [4684] |99-SRNP-413|651[0n]bp
Astraptes SENNOV [4685] |99-SRNP-409|651[0n]bp
Astraptes SENNOV [4686] |99-SRNP-412|651[0n]bp
Astraptes SENNOV [4687] |95-SRNP-6435|651[0n]bp
Astraptes SENNOV [4688] |96-SRNP-10154|651[0n]bp
Astraptes SENNOV [4689] |93-SRNP-3603.2|651[0n]bp
Astraptes SENNOV [4690] |89-SRNP-23|651[0n]bp
Astraptes SENNOV [4691] |93-SRNP-5558.1|651[0n]bp
Astraptes SENNOV [4692] |93-SRNP-3701|651[0n]bp
Astraptes SENNOV [4693] |95-SRNP-8643|651[0n]bp
Astraptes SENNOV [4694] |95-SRNP-9333|651[0n]bp
Astraptes SENNOV [4695] |96-SRNP-8770|651[0n]bp
Astraptes SENNOV [4696] |96-SRNP-8797|651[0n]bp
Astraptes SENNOV [4697] |99-SRNP-207|651[0n]bp
Astraptes SENNOV [4698] |95-SRNP-6869|651[0n]bp
Astraptes SENNOV [4699] |99-SRNP-403|651[0n]bp

```



```

Astraptles SENNOV [4697] 99-SRNP-2071651[0n]bp
Astraptles SENNOV [4698] 95-SRNP-6869|651[0n]bp
Astraptles SENNOV [4699] 99-SRNP-403|651[0n]bp
Astraptles SENNOV [4700] 93-SRNP-2206|651[0n]bp
Astraptles SENNOV [4701] 93-SRNP-2201|651[0n]bp
Astraptles SENNOV [4702] 02-SRNP-13088|651[0n]bp
Astraptles SENNOV [4703] 95-SRNP-4533|651[0n]bp
Astraptles SENNOV [4704] 93-SRNP-1025|651[0n]bp
Astraptles SENNOV [4705] 93-SRNP-2208|651[0n]bp
Astraptles SENNOV [4706] 96-SRNP-8773|645[0n]bp
Astraptles SENNOV [4707] 99-SRNP-399|645[0n]bp
Astraptles SENNOV [4708] 92-SRNP-69|645[0n]bp
Astraptles SENNOV [4709] 92-SRNP-70|636[0n]bp
Astraptles SENNOV [4710] 96-SRNP-812|639[0n]bp
Astraptles SENNOV [4711] 99-SRNP-410|639[0n]bp
Astraptles SENNOV [4712] 95-SRNP-6476|609[0n]bp
Astraptles SENNOV [4713] 91-SRNP-3005|609[0n]bp
Astraptles SENNOV [4714] 96-SRNP-8769|645[0n]bp
Astraptles SENNOV [4715] 04-SRNP-47619|633[0n]bp
Astraptles SENNOV [4716] 04-SRNP-47520|666[0n]bp
Astraptles SENNOV [4717] 04-SRNP-47264|666[0n]bp
Astraptles SENNOV [4718] 06-SRNP-46624|666[0n]bp
Astraptles SENNOV [4719] 07-SRNP-23823|669[0n]bp
Astraptles SENNOV [4720] 99-SRNP-17188|651[1n]bp
Astraptles SENNOV [4721] 03-SRNP-22238|666[0n]bp
Astraptles SENNOV [4722] 03-SRNP-22239|666[0n]bp
Astraptles SENNOV [4723] 06-SRNP-2651|666[0n]bp
Astraptles SENNOV [4724] 06-SRNP-36042|669[0n]bp
Astraptles SENNOV [4725] 03-SRNP-3011|669[2n]bp
Astraptles SENNOV [4726] 05-SRNP-55272|666[0n]bp
Astraptles SENNOV [4727] 05-SRNP-45346|669[1n]bp
Astraptles SENNOV [4728] 95-SRNP-10951|642[0n]bp
Astraptles SENNOV [4729] 06-SRNP-47118|669[0n]bp
Astraptles SENNOV [4730] 07-SRNP-58784|669[0n]bp
Astraptles SENNOV [4731] 92-SRNP-5660|645[1n]bp
Astraptles SENNOV [4732] 06-SRNP-31380|645[1n]bp
Astraptles SENNOV [4733] 06-SRNP-46575|669[0n]bp
Astraptles SENNOV [4734] 06-SRNP-46050|669[0n]bp
Astraptles SENNOV [4735] 04-SRNP-49527|669[0n]bp
Astraptles SENNOV [4736] 04-SRNP-45246|669[0n]bp
Astraptles SENNOV [4737] 03-SRNP-22051|669[0n]bp
Astraptles SENNOV [4738] 05-SRNP-7221|669[0n]bp
Astraptles SENNOV [4739] 05-SRNP-46983|669[0n]bp
Astraptles SENNOV [4740] 04-SRNP-47268|666[0n]bp
Astraptles SENNOV [4741] 03-SRNP-14687|666[0n]bp
Astraptles SENNOV [4742] 06-SRNP-46931|669[0n]bp
Astraptles SENNOV [4743] 06-SRNP-460|666[1n]bp
Astraptles SENNOV [4744] 91-SRNP-2715|651[0n]bp
Astraptles SENNOV [4745] 93-SRNP-3656|651[0n]bp
Astraptles SENNOV [4746] 93-SRNP-3655|651[0n]bp
Astraptles SENNOV [4747] 96-SRNP-8802|651[0n]bp
Astraptles SENNOV [4748] 99-SRNP-2445|651[0n]bp
Astraptles SENNOV [4749] 99-SRNP-401|651[0n]bp
Astraptles SENNOV [4750] 96-SRNP-6857|651[0n]bp
Astraptles SENNOV [4751] 95-SRNP-6898|651[0n]bp
Astraptles SENNOV [4752] 92-SRNP-4398|651[0n]bp
Astraptles SENNOV [4753] 95-SRNP-6899|648[0n]bp
Astraptles SENNOV [4754] 04-SRNP-47266|633[0n]bp
Astraptles SENNOV [4755] 98-SRNP-3453|651[0n]bp
Astraptles SENNOV [4756] 91-SRNP-3045|438[0n]bp
Astraptles SENNOV [4757] 93-SRNP-3603.1|651[0n]bp
Astraptles SENNOV [4758] 06-SRNP-59595|645[0n]bp
Astraptles SENNOV [4759] 06-SRNP-47181|669[0n]bp
Astraptles SENNOV [4760] 07-SRNP-30435|669[0n]bp
Astraptles SENNOV [4761] 08-SRNP-55549|645[0n]bp
Astraptles INGCUPnumt [4762] 02-SRNP-13284|651[7n]bp
Astraptles SENNOVnumt [4763] 06-SRNP-23360|645[1n]bp
Astraptles YESENnumt [4764] 06-SRNP-46388|666[3n]bp
Astraptles YESENnumt [4765] 06-SRNP-33139|639[1n]bp
Astraptles SENNOVnumt [4766] 04-SRNP-47236|663[0n]bp
Astraptles SENNOVnumt [4767] 03-SRNP-3010|669[1n]bp
Astraptles YESENnumt [4768] 00-SRNP-11386|651[0n]bp
Astraptles SENNOVnumt [4769] 94-SRNP-6452|651[0n]bp
Astraptles SENNOVnumt [4770] 93-SRNP-2680|651[0n]bp
Astraptles YESENnumt [4771] 05-SRNP-1089|669[0n]bp
Astraptles YESENnumt [4772] 06-SRNP-46389|669[0n]bp
Astraptles YESENnumt [4773] 07-SRNP-24037|654[0n]bp
Astraptles CELT [4774] 02-SRNP-31493|651[0n]bp
Astraptles CELT [4775] 02-SRNP-31136|651[0n]bp
Astraptles CELT [4776] 06-SRNP-48008|594[0n]bp
Astraptles CELT [4777] 06-SRNP-47989|609[0n]bp
Astraptles CELT [4778] 07-SRNP-45471|669[1n]bp
Astraptles CELT [4779] 07-SRNP-1959|669[1n]bp
Astraptles CELT [4780] 02-SRNP-29799|651[0n]bp
Astraptles CELT [4781] 06-SRNP-3010|666[0n]bp
Astraptles CELT [4782] 05-SRNP-20730|666[0n]bp
Astraptles CELT [4783] 05-SRNP-1765|669[0n]bp
Astraptles CELT [4784] 06-SRNP-3231|669[0n]bp
Astraptles CELT [4785] 05-SRNP-20729|669[0n]bp
Astraptles CELT [4786] 06-SRNP-46989|669[0n]bp
Astraptles CELT [4787] 07-SRNP-23567|669[0n]bp
Astraptles CELT [4788] 07-SRNP-23826|669[0n]bp
Astraptles CELT [4789] 97-SRNP-9604|645[0n]bp
Astraptles CELT [4790] 04-SRNP-48372|666[1n]bp
Astraptles CELT [4791] 06-SRNP-45462|669[3n]bp
Astraptles CELT [4792] 06-SRNP-4757|657[0n]bp
Astraptles CELT [4793] 05-SRNP-754|669[1n]bp
Astraptles CELT [4794] 04-SRNP-46734|663[0n]bp
Astraptles CELT [4795] 02-SRNP-31741|651[0n]bp
Astraptles CELT [4796] 02-SRNP-29082|651[0n]bp
Astraptles CELT [4797] 04-SRNP-46737|633[0n]bp
Astraptles CELT [4798] 04-SRNP-46063|633[0n]bp
Astraptles CELT [4799] 07-SRNP-1969|654[0n]bp

```

|           |       |        |               |      |      |    |
|-----------|-------|--------|---------------|------|------|----|
| Astraptes | CELT  | [4797] | 04-SRNP-46131 | 6531 | [0n] | bp |
| Astraptes | CELT  | [4798] | 04-SRNP-46063 | 6333 | [0n] | bp |
| Astraptes | CELT  | [4799] | 07-SRNP-1969  | 654  | [0n] | bp |
| Astraptes | CELT  | [4800] | 94-SRNP-9389  | 651  | [0n] | bp |
| Astraptes | CELT  | [4801] | 99-SRNP-5312  | 651  | [0n] | bp |
| Astraptes | CELT  | [4802] | 02-SRNP-33197 | 651  | [0n] | bp |
| Astraptes | CELT  | [4803] | 01-SRNP-1413  | 651  | [0n] | bp |
| Astraptes | CELT  | [4804] | 02-SRNP-31745 | 651  | [0n] | bp |
| Astraptes | CELT  | [4805] | 02-SRNP-33016 | 651  | [0n] | bp |
| Astraptes | CELT  | [4806] | 02-SRNP-29083 | 651  | [0n] | bp |
| Astraptes | CELT  | [4807] | 02-SRNP-31738 | 651  | [0n] | bp |
| Astraptes | CELT  | [4808] | 02-SRNP-29080 | 651  | [0n] | bp |
| Astraptes | CELT  | [4809] | 02-SRNP-29798 | 651  | [0n] | bp |
| Astraptes | CELT  | [4810] | 96-SRNP-227   | 651  | [0n] | bp |
| Astraptes | CELT  | [4811] | 02-SRNP-30241 | 651  | [0n] | bp |
| Astraptes | CELT  | [4812] | 02-SRNP-33002 | 651  | [0n] | bp |
| Astraptes | CELT  | [4813] | 02-SRNP-29054 | 651  | [0n] | bp |
| Astraptes | CELT  | [4814] | 02-SRNP-31739 | 651  | [0n] | bp |
| Astraptes | CELT  | [4805] | 02-SRNP-33016 | 651  | [0n] | bp |
| Astraptes | CELT  | [4802] | 02-SRNP-33197 | 651  | [0n] | bp |
| Astraptes | CELT  | [4815] | 06-SRNP-3011  | 666  | [0n] | bp |
| Astraptes | CELT  | [4816] | 04-SRNP-46459 | 666  | [0n] | bp |
| Astraptes | CELT  | [4817] | 05-SRNP-20279 | 666  | [0n] | bp |
| Astraptes | CELT  | [4818] | 05-SRNP-20731 | 666  | [0n] | bp |
| Astraptes | CELT  | [4819] | 05-SRNP-6757  | 666  | [0n] | bp |
| Astraptes | CELT  | [4820] | 05-SRNP-1608  | 666  | [0n] | bp |
| Astraptes | CELT  | [4821] | 05-SRNP-45088 | 666  | [0n] | bp |
| Astraptes | CELT  | [4822] | 02-SRNP-31377 | 642  | [0n] | bp |
| Astraptes | CELT  | [4823] | 05-SRNP-24514 | 669  | [0n] | bp |
| Astraptes | CELT  | [4824] | 04-SRNP-46431 | 669  | [0n] | bp |
| Astraptes | CELT  | [4825] | 06-SRNP-4630  | 669  | [0n] | bp |
| Astraptes | CELT  | [4826] | 06-SRNP-4631  | 669  | [0n] | bp |
| Astraptes | CELT  | [4827] | 06-SRNP-9528  | 669  | [0n] | bp |
| Astraptes | CELT  | [4828] | 06-SRNP-47745 | 669  | [0n] | bp |
| Astraptes | CELT  | [4829] | 07-SRNP-1958  | 669  | [0n] | bp |
| Astraptes | CELT  | [4830] | 07-SRNP-1967  | 669  | [0n] | bp |
| Astraptes | CELT  | [4831] | 07-SRNP-45467 | 669  | [0n] | bp |
| Astraptes | CELT  | [4832] | 07-SRNP-3042  | 669  | [0n] | bp |
| Astraptes | CELT  | [4833] | 07-SRNP-45470 | 669  | [0n] | bp |
| Astraptes | CELT  | [4834] | 07-SRNP-45603 | 669  | [0n] | bp |
| Astraptes | CELT  | [4835] | 07-SRNP-45602 | 669  | [0n] | bp |
| Astraptes | CELT  | [4836] | 07-SRNP-45608 | 669  | [0n] | bp |
| Astraptes | CELT  | [4837] | 07-SRNP-45607 | 669  | [0n] | bp |
| Astraptes | CELT  | [4838] | 07-SRNP-45600 | 669  | [0n] | bp |
| Astraptes | CELT  | [4839] | 07-SRNP-22224 | 669  | [0n] | bp |
| Astraptes | CELT  | [4840] | 08-SRNP-4065  | 669  | [0n] | bp |
| Astraptes | CELT  | [4841] | 09-SRNP-65963 | 669  | [0n] | bp |
| Astraptes | TRIGO | [4842] | 06-SRNP-55033 | 669  | [3n] | bp |
| Astraptes | TRIGO | [4843] | 07-SRNP-45479 | 669  | [0n] | bp |
| Astraptes | TRIGO | [4844] | 07-SRNP-45480 | 669  | [0n] | bp |
| Astraptes | TRIGO | [4845] | 06-SRNP-59720 | 669  | [0n] | bp |
| Astraptes | TRIGO | [4846] | 07-SRNP-45478 | 669  | [0n] | bp |
| Astraptes | TRIGO | [4847] | 07-SRNP-45482 | 669  | [0n] | bp |
| Astraptes | TRIGO | [4848] | 02-SRNP-31761 | 651  | [0n] | bp |
| Astraptes | TRIGO | [4849] | 91-SRNP-2346  | 627  | [0n] | bp |
| Astraptes | TRIGO | [4850] | 06-SRNP-59719 | 615  | [0n] | bp |
| Astraptes | TRIGO | [4851] | 97-SRNP-5364  | 651  | [0n] | bp |
| Astraptes | TRIGO | [4852] | 97-SRNP-5500  | 642  | [0n] | bp |
| Astraptes | TRIGO | [4853] | 07-SRNP-55072 | 627  | [0n] | bp |
| Astraptes | TRIGO | [4854] | 02-SRNP-30290 | 651  | [0n] | bp |
| Astraptes | TRIGO | [4855] | 02-SRNP-30291 | 651  | [0n] | bp |
| Astraptes | TRIGO | [4856] | 92-SRNP-4386  | 651  | [0n] | bp |
| Astraptes | TRIGO | [4857] | 02-SRNP-31535 | 651  | [0n] | bp |
| Astraptes | TRIGO | [4858] | 03-SRNP-17651 | 666  | [0n] | bp |
| Astraptes | TRIGO | [4859] | 05-SRNP-45112 | 666  | [0n] | bp |
| Astraptes | TRIGO | [4860] | 05-SRNP-45125 | 666  | [0n] | bp |
| Astraptes | TRIGO | [4861] | 05-SRNP-45076 | 666  | [0n] | bp |
| Astraptes | TRIGO | [4862] | 05-SRNP-45073 | 666  | [0n] | bp |
| Astraptes | TRIGO | [4863] | 01-SRNP-9825  | 651  | [0n] | bp |
| Astraptes | TRIGO | [4864] | 02-SRNP-29103 | 651  | [0n] | bp |
| Astraptes | TRIGO | [4865] | 02-SRNP-31684 | 651  | [0n] | bp |
| Astraptes | TRIGO | [4866] | 02-SRNP-33258 | 651  | [0n] | bp |
| Astraptes | TRIGO | [4867] | 02-SRNP-31538 | 651  | [0n] | bp |
| Astraptes | TRIGO | [4868] | 02-SRNP-31536 | 651  | [0n] | bp |
| Astraptes | TRIGO | [4869] | 02-SRNP-33259 | 651  | [0n] | bp |
| Astraptes | TRIGO | [4870] | 02-SRNP-31537 | 651  | [0n] | bp |
| Astraptes | TRIGO | [4871] | 02-SRNP-31762 | 651  | [0n] | bp |
| Astraptes | TRIGO | [4872] | 02-SRNP-31756 | 651  | [0n] | bp |
| Astraptes | TRIGO | [4873] | 02-SRNP-33261 | 651  | [0n] | bp |
| Astraptes | TRIGO | [4874] | 98-SRNP-5868  | 651  | [0n] | bp |
| Astraptes | TRIGO | [4875] | 02-SRNP-31748 | 651  | [0n] | bp |
| Astraptes | TRIGO | [4876] | 02-SRNP-33260 | 651  | [0n] | bp |
| Astraptes | TRIGO | [4877] | 02-SRNP-31539 | 651  | [0n] | bp |
| Astraptes | TRIGO | [4878] | 02-SRNP-31755 | 651  | [0n] | bp |
| Astraptes | TRIGO | [4879] | 97-SRNP-5215  | 651  | [0n] | bp |
| Astraptes | TRIGO | [4880] | 97-SRNP-5499  | 651  | [0n] | bp |
| Astraptes | TRIGO | [4881] | 02-SRNP-31620 | 651  | [0n] | bp |
| Astraptes | TRIGO | [4882] | 92-SRNP-5726  | 651  | [0n] | bp |
| Astraptes | TRIGO | [4883] | 02-SRNP-31621 | 651  | [0n] | bp |
| Astraptes | TRIGO | [4884] | 91-SRNP-2576  | 651  | [0n] | bp |
| Astraptes | TRIGO | [4885] | 02-SRNP-31784 | 651  | [0n] | bp |
| Astraptes | TRIGO | [4886] | 02-SRNP-31782 | 651  | [0n] | bp |
| Astraptes | TRIGO | [4887] | 91-SRNP-2694  | 651  | [0n] | bp |
| Astraptes | TRIGO | [4888] | 02-SRNP-31817 | 651  | [0n] | bp |
| Astraptes | TRIGO | [4889] | 02-SRNP-33453 | 651  | [0n] | bp |
| Astraptes | TRIGO | [4890] | 97-SRNP-4485  | 651  | [0n] | bp |
| Astraptes | TRIGO | [4891] | 91-SRNP-2631  | 651  | [0n] | bp |
| Astraptes | TRIGO | [4892] | 92-SRNP-4379  | 651  | [0n] | bp |
| Astraptes | TRIGO | [4893] | 97-SRNP-5939  | 651  | [0n] | bp |
| Astraptes | TRIGO | [4894] | 93-SRNP-7152  | 651  | [0n] | bp |
| Astraptes | TRIGO | [4895] | 93-SRNP-8663  | 651  | [0n] | bp |
| Astraptes | TRIGO | [4896] | 97-SRNP-5453  | 651  | [0n] | bp |
| Astraptes | TRIGO | [4897] | 02-SRNP-31820 | 651  | [0n] | bp |

```

Astraptes TRIGO [4895] | 93-SRNP-8003 | 651 [0n]bp
Astraptes TRIGO [4896] | 97-SRNP-5453 | 651 [0n]bp
Astraptes TRIGO [4897] | 02-SRNP-31820 | 651 [0n]bp
Astraptes TRIGO [4898] | 02-SRNP-31786 | 651 [0n]bp
Astraptes TRIGO [4899] | 92-SRNP-4372 | 651 [0n]bp
Astraptes TRIGO [4900] | 97-SRNP-5173 | 651 [0n]bp
Astraptes TRIGO [4901] | 87-SRNP-1357 | 642 [0n]bp
Astraptes TRIGO [4902] | 91-SRNP-2522 | 642 [0n]bp
Astraptes TRIGO [4903] | 01-SRNP-9111 | 645 [0n]bp
Astraptes TRIGO [4904] | 96-SRNP-9543 | 651 [0n]bp
Astraptes TRIGO [4904] | 96-SRNP-9543 | 651 [0n]bp
Astraptes TRIGO [4905] | 06-SRNP-55035 | 558 [0n]bp
Astraptes TRIGO [4906] | 05-SRNP-45110 | 669 [0n]bp
Astraptes TRIGO [4907] | 05-SRNP-45111 | 669 [0n]bp
Astraptes TRIGO [4908] | 05-SRNP-65453 | 669 [0n]bp
Astraptes TRIGO [4909] | 06-SRNP-58075 | 669 [0n]bp
Astraptes TRIGO [4910] | 06-SRNP-58074 | 669 [0n]bp
Astraptes TRIGO [4911] | 06-SRNP-58073 | 669 [0n]bp
Astraptes TRIGO [4912] | 06-SRNP-59785 | 669 [0n]bp
Astraptes TRIGO [4913] | 07-SRNP-45559 | 669 [0n]bp
Astraptes TRIGO [4914] | 08-SRNP-2317 | 645 [0n]bp
Urbanus evona [4915] | 93-SRNP-3406 | 567 [1n]bp
Urbanus evona [4916] | 90-SRNP-1654.1 | 600 [1n]bp
Urbanus evona [4917] | 04-SRNP-45778 | 669 [1n]bp
Urbanus evona [4918] | 05-SRNP-66411 | 669 [0n]bp
Urbanus evona [4919] | 05-SRNP-59072 | 669 [0n]bp
Urbanus evona [4920] | 05-SRNP-57365 | 669 [0n]bp
Urbanus evona [4921] | 05-SRNP-57364 | 669 [0n]bp
Urbanus evona [4922] | 05-SRNP-58937 | 669 [0n]bp
Urbanus evona [4923] | 04-SRNP-15286 | 669 [0n]bp
Urbanus evona [4924] | 04-SRNP-14470 | 669 [0n]bp
Urbanus evona [4925] | 02-SRNP-32829 | 669 [0n]bp
Urbanus evona [4926] | 02-SRNP-32830 | 669 [0n]bp
Urbanus evona [4927] | 01-SRNP-14067 | 669 [0n]bp
Urbanus evona [4928] | 04-SRNP-45787 | 669 [0n]bp
Urbanus evona [4929] | 97-SRNP-4685 | 615 [0n]bp
Urbanus evona [4930] | 02-SRNP-32828 | 669 [0n]bp
Urbanus evona [4931] | 06-SRNP-57688 | 669 [0n]bp
Urbanus evona [4932] | 07-SRNP-57988 | 669 [0n]bp
Urbanus esta [4933] | 93-SRNP-5934 | 522 [0n]bp
Urbanus esta [4934] | 97-SRNP-2009 | 519 [0n]bp
Urbanus esta [4935] | 97-SRNP-2006 | 522 [0n]bp
Urbanus esta [4936] | 04-SRNP-56961 | 669 [0n]bp
Urbanus esta [4937] | 07-SRNP-45289 | 669 [0n]bp
Urbanus esta [4938] | 06-SRNP-40068 | 585 [0n]bp
Urbanus esta [4939] | 06-SRNP-1725 | 669 [0n]bp
Urbanus esta [4940] | 93-SRNP-1169 | 384 [0n]bp
Urbanus esta [4941] | 01-SRNP-3184 | 639 [0n]bp
Urbanus esta [4942] | 06-SRNP-19547 | 609 [0n]bp
Urbanus esta [4943] | 00-SRNP-1522 | 669 [0n]bp
Urbanus esta [4944] | 06-SRNP-31215 | 669 [0n]bp
Urbanus esta [4945] | 05-SRNP-416 | 669 [1n]bp
Urbanus esta [4946] | 07-SRNP-65020 | 663 [0n]bp
Urbanus esta [4947] | 06-SRNP-57925 | 663 [0n]bp
Urbanus esta [4948] | 06-SRNP-2685 | 666 [0n]bp
Urbanus esta [4949] | 01-SRNP-17208 | 669 [1n]bp
Urbanus esta [4950] | 05-SRNP-65398 | 669 [0n]bp
Urbanus esta [4951] | 07-SRNP-20182 | 669 [0n]bp
Urbanus esta [4952] | 06-SRNP-31006 | 669 [0n]bp
Urbanus esta [4953] | 05-SRNP-33820 | 669 [0n]bp
Urbanus esta [4954] | 05-SRNP-58910 | 669 [0n]bp
Urbanus esta [4955] | 06-SRNP-31058 | 669 [0n]bp
Urbanus esta [4956] | 05-SRNP-59305 | 669 [0n]bp
Urbanus esta [4957] | 01-SRNP-473 | 669 [0n]bp
Urbanus esta [4958] | 02-SRNP-1933 | 669 [0n]bp
Urbanus esta [4959] | 02-SRNP-1930 | 669 [0n]bp
Urbanus esta [4960] | 00-SRNP-1520 | 669 [0n]bp
Urbanus esta [4961] | 00-SRNP-1519 | 669 [0n]bp
Urbanus esta [4962] | 01-SRNP-17209 | 669 [0n]bp
Urbanus esta [4963] | 04-SRNP-15166 | 669 [0n]bp
Urbanus esta [4964] | 04-SRNP-15168 | 669 [0n]bp
Urbanus esta [4965] | 02-SRNP-1932 | 669 [0n]bp
Urbanus esta [4966] | 02-SRNP-32029 | 642 [0n]bp
Urbanus esta [4967] | 06-SRNP-19546 | 606 [0n]bp
Urbanus esta [4968] | 07-SRNP-31014 | 669 [0n]bp
Urbanus esta [4969] | 06-SRNP-30965 | 669 [0n]bp
Urbanus esta [4970] | 06-SRNP-31059 | 669 [0n]bp
Urbanus esta [4971] | 06-SRNP-1984 | 669 [0n]bp
Urbanus esta [4972] | 06-SRNP-1745 | 669 [0n]bp
Urbanus esta [4973] | 06-SRNP-30964 | 669 [0n]bp
Urbanus esta [4974] | 06-SRNP-30990 | 669 [0n]bp
Urbanus esta [4975] | 06-SRNP-30961 | 669 [0n]bp
Urbanus esta [4976] | 06-SRNP-31004 | 669 [0n]bp
Urbanus esta [4977] | 06-SRNP-1743 | 669 [0n]bp
Urbanus esta [4978] | 06-SRNP-1985 | 669 [0n]bp
Urbanus esta [4979] | 05-SRNP-59539 | 669 [0n]bp
Urbanus esta [4980] | 05-SRNP-59065 | 669 [0n]bp
Urbanus esta [4981] | 06-SRNP-1798 | 669 [0n]bp
Urbanus esta [4982] | 06-SRNP-1747 | 669 [0n]bp
Urbanus esta [4983] | 06-SRNP-1746 | 669 [0n]bp
Urbanus esta [4984] | 06-SRNP-1982 | 669 [0n]bp
Urbanus esta [4985] | 06-SRNP-2690 | 669 [0n]bp
Urbanus esta [4986] | 06-SRNP-4071 | 669 [0n]bp
Urbanus esta [4987] | 07-SRNP-56430 | 669 [0n]bp
Urbanus esta [4988] | 07-SRNP-1190 | 669 [0n]bp
Urbanus esta [4989] | 07-SRNP-65022 | 669 [0n]bp
Urbanus esta [4990] | 07-SRNP-65019 | 669 [0n]bp
Urbanus esta [4991] | 06-SRNP-1532 | 669 [0n]bp
Urbanus esta [4992] | 06-SRNP-30959 | 669 [0n]bp
Urbanus esta [4993] | 06-SRNP-30040 | 669 [0n]bp
Urbanus esta [4994] | 06-SRNP-1983 | 669 [0n]bp
Urbanus esta [4995] | 05-SRNP-417 | 669 [0n]bp
Urbanus esta [4996] | 05-SRNP-41969 | 669 [0n]bp

```

```

Urbanus esta|[4994]|06-SRNP-1983|669[0n]bp
Urbanus esta|[4995]|05-SRNP-417|669[0n]bp
Urbanus esta|[4996]|05-SRNP-41969|669[0n]bp
Urbanus esta|[4997]|02-SRNP-2902|669[0n]bp
Urbanus esta|[4998]|01-SRNP-1157|669[0n]bp
Urbanus esta|[4999]|00-SRNP-20821|669[0n]bp
Urbanus esta|[5000]|02-SRNP-1896|669[0n]bp
Urbanus esta|[5001]|02-SRNP-1436|669[0n]bp
Urbanus esta|[5002]|02-SRNP-2373|669[0n]bp
Urbanus esta|[5003]|02-SRNP-1435|669[0n]bp
Urbanus esta|[5004]|02-SRNP-546|669[0n]bp
Urbanus esta|[5005]|01-SRNP-16946|669[0n]bp
Urbanus esta|[5006]|02-SRNP-32024|669[0n]bp
Urbanus esta|[5007]|04-SRNP-55662|669[0n]bp
Urbanus esta|[5008]|05-SRNP-30144|669[0n]bp
Urbanus esta|[5009]|04-SRNP-30928|669[0n]bp
Urbanus esta|[5010]|02-SRNP-2320|612[0n]bp
Urbanus esta|[5011]|02-SRNP-402|669[0n]bp
Urbanus esta|[5012]|02-SRNP-401|669[0n]bp
Urbanus esta|[5013]|06-SRNP-20646|669[5n]bp
Urbanus esta|[5014]|07-SRNP-58873|669[0n]bp
Urbanus esmeraldus|[5015]|97-SRNP-9206|384[0n]bp
Urbanus esmeraldus|[5016]|97-SRNP-9537|384[0n]bp
Urbanus esmeraldus|[5017]|97-SRNP-9643|384[0n]bp
Urbanus esmeraldus|[5018]|97-SRNP-9544|588[0n]bp
Urbanus esmeraldus|[5019]|92-SRNP-4090|567[0n]bp
Urbanus esmeraldus|[5020]|93-SRNP-6647.1|567[0n]bp
Urbanus esmeraldus|[5021]|02-SRNP-28832|669[0n]bp
Urbanus esmeraldus|[5022]|02-SRNP-28843|669[0n]bp
Urbanus esmeraldus|[5023]|99-SRNP-3218|669[0n]bp
Urbanus esmeraldus|[5024]|02-SRNP-28844|669[0n]bp
Urbanus esmeraldus|[5025]|06-SRNP-59207|603[0n]bp
Urbanus esmeraldus|[5026]|97-SRNP-9775|588[0n]bp
Urbanus esmeraldus|[5027]|06-SRNP-56793|618[2n]bp
Urbanus esmeraldus|[5028]|97-SRNP-9209|621[0n]bp
Urbanus esmeraldus|[5029]|97-SRNP-9213|609[0n]bp
Urbanus esmeraldus|[5030]|97-SRNP-9207|609[0n]bp
Urbanus esmeraldus|[5031]|97-SRNP-9532|609[0n]bp
Urbanus esmeraldus|[5032]|02-SRNP-15771|669[0n]bp
Urbanus esmeraldus|[5033]|01-SRNP-17432|372[0n]bp
Urbanus esmeraldus|[5034]|01-SRNP-17161|627[0n]bp
Urbanus esmeraldus|[5035]|07-SRNP-20116|669[0n]bp
Urbanus esmeraldus|[5036]|05-SRNP-56429|669[0n]bp
Urbanus esmeraldus|[5037]|05-SRNP-56430|627[0n]bp
Urbanus esmeraldus|[5038]|03-SRNP-1944|663[0n]bp
Urbanus esmeraldus|[5039]|02-SRNP-17015|660[0n]bp
Urbanus esmeraldus|[5040]|03-SRNP-20895|660[0n]bp
Urbanus esmeraldus|[5041]|01-SRNP-17567|666[0n]bp
Urbanus esmeraldus|[5042]|03-SRNP-17407|666[0n]bp
Urbanus esmeraldus|[5043]|05-SRNP-32493|666[0n]bp
Urbanus esmeraldus|[5044]|06-SRNP-31303|666[0n]bp
Urbanus esmeraldus|[5045]|06-SRNP-31301|666[0n]bp
Urbanus esmeraldus|[5046]|06-SRNP-31302|666[0n]bp
Urbanus esmeraldus|[5047]|06-SRNP-30507|669[1n]bp
Urbanus esmeraldus|[5048]|01-SRNP-17046|669[0n]bp
Urbanus esmeraldus|[5049]|01-SRNP-17434|669[0n]bp
Urbanus esmeraldus|[5050]|01-SRNP-17160|669[0n]bp
Urbanus esmeraldus|[5051]|01-SRNP-17141|669[0n]bp
Urbanus esmeraldus|[5052]|01-SRNP-17081|669[0n]bp
Urbanus esmeraldus|[5053]|99-SRNP-3219|669[0n]bp
Urbanus esmeraldus|[5054]|01-SRNP-17561|669[0n]bp
Urbanus esmeraldus|[5055]|02-SRNP-32156|669[0n]bp
Urbanus esmeraldus|[5056]|99-SRNP-7525|669[0n]bp
Urbanus esmeraldus|[5057]|03-SRNP-30344|669[0n]bp
Urbanus esmeraldus|[5058]|04-SRNP-22082|669[0n]bp
Urbanus esmeraldus|[5059]|04-SRNP-22250|669[0n]bp
Urbanus esmeraldus|[5060]|03-SRNP-17392|669[0n]bp
Urbanus esmeraldus|[5061]|03-SRNP-17393|669[0n]bp
Urbanus esmeraldus|[5062]|03-SRNP-17394|669[0n]bp
Urbanus esmeraldus|[5063]|06-SRNP-33147|669[0n]bp
Urbanus esmeraldus|[5064]|06-SRNP-45697|669[0n]bp
Urbanus esmeraldus|[5065]|05-SRNP-34511|669[0n]bp
Urbanus esmeraldus|[5066]|05-SRNP-32807|669[0n]bp
Urbanus esmeraldus|[5067]|05-SRNP-32806|669[0n]bp
Urbanus esmeraldus|[5068]|05-SRNP-34529|669[0n]bp
Urbanus esmeraldus|[5069]|05-SRNP-32491|669[0n]bp
Urbanus esmeraldus|[5070]|05-SRNP-59480|669[0n]bp
Urbanus esmeraldus|[5071]|05-SRNP-46986|669[0n]bp
Urbanus esmeraldus|[5072]|05-SRNP-45421|669[0n]bp
Urbanus esmeraldus|[5073]|05-SRNP-46937|669[0n]bp
Urbanus esmeraldus|[5074]|05-SRNP-59048|669[0n]bp
Urbanus esmeraldus|[5075]|04-SRNP-26751|669[0n]bp
Urbanus esmeraldus|[5076]|01-SRNP-17442|669[0n]bp
Urbanus esmeraldus|[5077]|02-SRNP-29483|669[0n]bp
Urbanus esmeraldus|[5078]|97-SRNP-4935|669[0n]bp
Urbanus esmeraldus|[5079]|04-SRNP-15171|669[0n]bp
Urbanus esmeraldus|[5080]|04-SRNP-16070|669[0n]bp
Urbanus esmeraldus|[5081]|04-SRNP-13825|669[0n]bp
Urbanus esmeraldus|[5082]|04-SRNP-14316|669[0n]bp
Urbanus esmeraldus|[5083]|04-SRNP-48164|669[0n]bp
Urbanus esmeraldus|[5084]|04-SRNP-13677|669[0n]bp
Urbanus esmeraldus|[5085]|04-SRNP-13824|669[0n]bp
Urbanus esmeraldus|[5086]|01-SRNP-17077|669[0n]bp
Urbanus esmeraldus|[5087]|01-SRNP-17185|669[0n]bp
Urbanus esmeraldus|[5088]|01-SRNP-17421|669[0n]bp
Urbanus esmeraldus|[5089]|01-SRNP-17080.01|669[0n]bp
Urbanus esmeraldus|[5090]|01-SRNP-17163|669[0n]bp
Urbanus esmeraldus|[5091]|01-SRNP-17433|669[0n]bp
Urbanus esmeraldus|[5092]|01-SRNP-11002|669[0n]bp
Urbanus esmeraldus|[5093]|02-SRNP-29162|669[0n]bp
Urbanus esmeraldus|[5094]|01-SRNP-17443|669[0n]bp
Urbanus esmeraldus|[5095]|02-SRNP-5542|669[0n]bp
Urbanus esmeraldus|[5096]|01-SRNP-17426|669[0n]bp

```

```

Urbanus esmeraldus|[5094]|01-SRNP-17443|669[0n]bp
Urbanus esmeraldus|[5095]|02-SRNP-5542|669[0n]bp
Urbanus esmeraldus|[5096]|01-SRNP-17426|669[0n]bp
Urbanus esmeraldus|[5097]|01-SRNP-17562|669[0n]bp
Urbanus esmeraldus|[5098]|02-SRNP-13383|669[0n]bp
Urbanus esmeraldus|[5099]|04-SRNP-45661|669[0n]bp
Urbanus esmeraldus|[5100]|04-SRNP-45660|669[0n]bp
Urbanus esmeraldus|[5101]|04-SRNP-45662|669[0n]bp
Urbanus esmeraldus|[5102]|05-SRNP-33816|666[0n]bp
Urbanus esmeraldus|[5103]|03-SRNP-16910|669[0n]bp
Urbanus esmeraldus|[5104]|01-SRNP-17439|669[0n]bp
Urbanus esmeraldus|[5105]|97-SRNP-4639|609[0n]bp
Urbanus esmeraldus|[5106]|97-SRNP-4567|609[0n]bp
Urbanus esmeraldus|[5107]|97-SRNP-4640|609[0n]bp
Urbanus esmeraldus|[5108]|99-SRNP-8598|645[0n]bp
Urbanus esmeraldus|[5109]|04-SRNP-45064|657[0n]bp
Urbanus esmeraldus|[5110]|01-SRNP-17131|660[0n]bp
Urbanus esmeraldus|[5111]|97-SRNP-4936|618[0n]bp
Urbanus esmeraldus|[5112]|97-SRNP-9658|609[0n]bp
Urbanus esmeraldus|[5113]|01-SRNP-17047|615[0n]bp
Urbanus esmeraldus|[5114]|97-SRNP-9211|615[0n]bp
Urbanus esmeraldus|[5115]|04-SRNP-21981|609[0n]bp
Urbanus esmeraldus|[5116]|04-SRNP-45065|609[0n]bp
Urbanus esmeraldus|[5117]|03-SRNP-19022|609[0n]bp
Urbanus esmeraldus|[5118]|03-SRNP-17465|609[0n]bp
Urbanus esmeraldus|[5119]|97-SRNP-5646|609[0n]bp
Urbanus esmeraldus|[5120]|97-SRNP-9554|609[0n]bp
Urbanus esmeraldus|[5121]|96-SRNP-11210|609[0n]bp
Urbanus esmeraldus|[5122]|97-SRNP-9552|609[0n]bp
Urbanus esmeraldus|[5123]|97-SRNP-9531|609[0n]bp
Urbanus esmeraldus|[5124]|97-SRNP-9530|609[0n]bp
Urbanus esmeraldus|[5125]|97-SRNP-9208|609[0n]bp
Urbanus esmeraldus|[5126]|97-SRNP-9647|609[0n]bp
Urbanus esmeraldus|[5127]|97-SRNP-9558|609[0n]bp
Urbanus esmeraldus|[5128]|97-SRNP-9645|609[0n]bp
Urbanus esmeraldus|[5129]|97-SRNP-9843|609[0n]bp
Urbanus esmeraldus|[5130]|97-SRNP-9646|609[0n]bp
Urbanus esmeraldus|[5131]|97-SRNP-5807|606[0n]bp
Urbanus esmeraldus|[5132]|05-SRNP-32029|636[0n]bp
Urbanus esmeraldus|[5133]|03-SRNP-29671|633[0n]bp
Urbanus esmeraldus|[5134]|02-SRNP-5961|609[0n]bp
Urbanus esmeraldus|[5135]|01-SRNP-17079|609[0n]bp
Urbanus esmeraldus|[5136]|01-SRNP-17158|609[0n]bp
Urbanus esmeraldus|[5137]|01-SRNP-17566|609[0n]bp
Urbanus esmeraldus|[5138]|95-SRNP-9803|609[0n]bp
Urbanus esmeraldus|[5139]|95-SRNP-9805|609[0n]bp
Urbanus esmeraldus|[5140]|95-SRNP-9968|609[0n]bp
Urbanus esmeraldus|[5141]|95-SRNP-8976|609[0n]bp
Urbanus esmeraldus|[5142]|01-SRNP-17083|609[0n]bp
Urbanus esmeraldus|[5143]|03-SRNP-16636|669[0n]bp
Urbanus esmeraldus|[5144]|06-SRNP-34518|669[0n]bp
Urbanus esmeraldus|[5145]|06-SRNP-46734|669[0n]bp
Urbanus esmeraldus|[5146]|07-SRNP-56341|669[0n]bp
Urbanus esmeraldus|[5147]|07-SRNP-56359|669[0n]bp
Urbanus esmeraldus|[5148]|07-SRNP-56490|669[0n]bp
Urbanus esmeraldus|[5149]|07-SRNP-20117|669[0n]bp
Urbanus esmeraldus|[5150]|07-SRNP-58471|669[0n]bp
Urbanus esmeraldus|[5151]|07-SRNP-57861|669[0n]bp
Urbanus esmeraldus|[5152]|07-SRNP-57862|669[0n]bp
Urbanus esmeraldus|[5153]|08-SRNP-21596|669[0n]bp
Urbanus esmeraldus|[5154]|08-SRNP-23543|669[0n]bp
Urbanus esmeraldus|[5155]|08-SRNP-58525|669[0n]bp
Urbanus proteus|[5156]|97-SRNP-2922|609[0n]bp
Urbanus proteus|[5157]|02-SRNP-17912|669[0n]bp
Urbanus proteus|[5158]|02-SRNP-17915|669[0n]bp
Urbanus proteus|[5159]|02-SRNP-15156|669[0n]bp
Urbanus proteus|[5160]|02-SRNP-28591|669[0n]bp
Urbanus proteus|[5161]|03-SRNP-16230|669[0n]bp
Urbanus proteus|[5162]|02-SRNP-17914|669[0n]bp
Urbanus proteus|[5163]|97-SRNP-4503|645[0n]bp
Urbanus proteus|[5164]|94-SRNP-744|609[0n]bp
Urbanus proteus|[5165]|07-SRNP-55548|669[0n]bp
Urbanus proteus|[5166]|08-SRNP-71742|669[0n]bp
Urbanus proteus|[5167]|03-SRNP-16609|633[0n]bp
Urbanus proteus|[5168]|04-SRNP-12473|669[1n]bp
Urbanus proteus|[5169]|04-SRNP-12477|669[0n]bp
Urbanus proteus|[5170]|02-SRNP-1925|669[0n]bp
Urbanus proteus|[5171]|04-SRNP-12475|669[0n]bp
Urbanus proteus|[5172]|01-SRNP-4528|624[2n]bp
Urbanus proteus|[5173]|06-SRNP-4935|669[0n]bp
Urbanus proteus|[5174]|06-SRNP-20639|669[0n]bp
Urbanus proteus|[5175]|03-SRNP-16767|645[0n]bp
Urbanus proteus|[5176]|06-SRNP-31010|669[0n]bp
Urbanus proteus|[5177]|05-SRNP-31866|669[0n]bp
Urbanus proteus|[5178]|04-SRNP-45320|669[0n]bp
Urbanus proteus|[5179]|04-SRNP-45321|669[0n]bp
Urbanus proteus|[5180]|06-SRNP-33300|666[0n]bp
Urbanus proteus|[5181]|02-SRNP-15123|669[0n]bp
Urbanus proteus|[5182]|03-SRNP-16621|669[0n]bp
Urbanus proteus|[5183]|03-SRNP-16637|669[0n]bp
Urbanus proteus|[5184]|03-SRNP-12324|669[0n]bp
Urbanus proteus|[5185]|03-SRNP-16601|669[0n]bp
Urbanus proteus|[5186]|03-SRNP-16778|669[0n]bp
Urbanus proteus|[5187]|02-SRNP-29399|669[0n]bp
Urbanus proteus|[5188]|03-SRNP-16782|669[0n]bp
Urbanus proteus|[5189]|03-SRNP-16605|669[0n]bp
Urbanus proteus|[5190]|98-SRNP-4627|669[0n]bp
Urbanus proteus|[5191]|02-SRNP-29473|669[0n]bp
Urbanus proteus|[5192]|02-SRNP-17900|669[0n]bp
Urbanus proteus|[5193]|02-SRNP-17897|669[0n]bp
Urbanus proteus|[5194]|02-SRNP-17894|669[0n]bp
Urbanus proteus|[5195]|01-SRNP-12172|669[0n]bp
Urbanus proteus|[5196]|02-SRNP-28088|669[0n]bp

```

|                 |        |               |            |
|-----------------|--------|---------------|------------|
| Urbanus proteus | [5194] | 02-SRNP-17094 | 669[0n]bp  |
| Urbanus proteus | [5195] | 01-SRNP-12172 | 669[0n]bp  |
| Urbanus proteus | [5196] | 02-SRNP-28088 | 669[0n]bp  |
| Urbanus proteus | [5197] | 02-SRNP-28087 | 669[0n]bp  |
| Urbanus proteus | [5198] | 97-SRNP-2035  | 627[0n]bp  |
| Urbanus proteus | [5199] | 95-SRNP-4168  | 615[0n]bp  |
| Urbanus proteus | [5200] | 02-SRNP-15336 | 1468[0n]bp |
| Urbanus proteus | [5201] | 97-SRNP-3765  | 624[0n]bp  |
| Urbanus proteus | [5202] | 97-SRNP-450   | 585[0n]bp  |
| Urbanus proteus | [5203] | 97-SRNP-4059  | 564[0n]bp  |
| Urbanus proteus | [5204] | 07-SRNP-65362 | 669[0n]bp  |
| Urbanus proteus | [5205] | 07-SRNP-65363 | 669[0n]bp  |
| Urbanus proteus | [5206] | 07-SRNP-65361 | 669[0n]bp  |
| Urbanus proteus | [5207] | 04-SRNP-22094 | 669[0n]bp  |
| Urbanus proteus | [5208] | 06-SRNP-20989 | 669[0n]bp  |
| Urbanus proteus | [5209] | 06-SRNP-20638 | 669[0n]bp  |
| Urbanus proteus | [5210] | 05-SRNP-42674 | 669[0n]bp  |
| Urbanus proteus | [5211] | 05-SRNP-42675 | 669[0n]bp  |
| Urbanus proteus | [5212] | 02-SRNP-28144 | 669[0n]bp  |
| Urbanus proteus | [5213] | 09-SRNP-44384 | 669[0n]bp  |
| Urbanus proteus | [5214] | 95-SRNP-4171  | 639[0n]bp  |
| Urbanus proteus | [5215] | 08-SRNP-65051 | 651[0n]bp  |
| Urbanus proteus | [5216] | 07-SRNP-20070 | 645[0n]bp  |
| Urbanus proteus | [5217] | 02-SRNP-1919  | 645[0n]bp  |
| Urbanus proteus | [5218] | 03-SRNP-16226 | 645[0n]bp  |
| Urbanus proteus | [5219] | 04-SRNP-45331 | 645[0n]bp  |
| Urbanus proteus | [5220] | 04-SRNP-22097 | 645[0n]bp  |
| Urbanus proteus | [5221] | 03-SRNP-16604 | 645[0n]bp  |
| Urbanus proteus | [5222] | 03-SRNP-16643 | 645[0n]bp  |
| Urbanus proteus | [5223] | 03-SRNP-2587  | 645[0n]bp  |
| Urbanus proteus | [5224] | 03-SRNP-2943  | 645[0n]bp  |
| Urbanus proteus | [5225] | 06-SRNP-20992 | 645[0n]bp  |
| Urbanus proteus | [5226] | 03-SRNP-16622 | 645[0n]bp  |
| Urbanus proteus | [5227] | 97-SRNP-4440  | 621[0n]bp  |
| Urbanus proteus | [5228] | 03-SRNP-16638 | 621[0n]bp  |
| Urbanus proteus | [5229] | 97-SRNP-5092  | 609[0n]bp  |
| Urbanus proteus | [5230] | 97-SRNP-2067  | 609[0n]bp  |
| Urbanus proteus | [5231] | 95-SRNP-4170  | 609[0n]bp  |
| Urbanus proteus | [5232] | 97-SRNP-3766  | 609[0n]bp  |
| Urbanus proteus | [5233] | 02-SRNP-28072 | 609[0n]bp  |
| Urbanus proteus | [5234] | 01-SRNP-452   | 609[0n]bp  |
| Urbanus proteus | [5235] | 01-SRNP-978   | 609[0n]bp  |
| Urbanus proteus | [5236] | 95-SRNP-6395  | 609[0n]bp  |
| Urbanus proteus | [5237] | 95-SRNP-9306  | 609[0n]bp  |
| Urbanus proteus | [5238] | 97-SRNP-3010  | 609[0n]bp  |
| Urbanus proteus | [5239] | 95-SRNP-9354  | 609[0n]bp  |
| Urbanus proteus | [5240] | 94-SRNP-3026  | 588[0n]bp  |
| Urbanus proteus | [5241] | 97-SRNP-2037  | 606[0n]bp  |
| Urbanus proteus | [5242] | 04-SRNP-45179 | 669[0n]bp  |
| Urbanus proteus | [5243] | 02-SRNP-28093 | 663[0n]bp  |
| Urbanus proteus | [5244] | 03-SRNP-16771 | 669[0n]bp  |
| Urbanus proteus | [5245] | 02-SRNP-15128 | 669[0n]bp  |
| Urbanus proteus | [5246] | 95-SRNP-4169  | 615[0n]bp  |
| Urbanus proteus | [5247] | 97-SRNP-5093  | 582[0n]bp  |
| Urbanus proteus | [5248] | 97-SRNP-4803  | 609[0n]bp  |
| Urbanus proteus | [5249] | 07-SRNP-65369 | 669[0n]bp  |
| Urbanus proteus | [5250] | 03-SRNP-16611 | 657[0n]bp  |
| Urbanus proteus | [5251] | 03-SRNP-16895 | 657[0n]bp  |
| Urbanus proteus | [5252] | 02-SRNP-28761 | 657[0n]bp  |
| Urbanus proteus | [5253] | 02-SRNP-28758 | 669[0n]bp  |
| Urbanus proteus | [5254] | 01-SRNP-443   | 609[0n]bp  |
| Urbanus proteus | [5255] | 04-SRNP-22098 | 654[0n]bp  |
| Urbanus proteus | [5256] | 04-SRNP-22007 | 654[0n]bp  |
| Urbanus proteus | [5257] | 04-SRNP-47421 | 669[0n]bp  |
| Urbanus proteus | [5258] | 04-SRNP-33891 | 669[0n]bp  |
| Urbanus proteus | [5259] | 05-SRNP-32458 | 669[0n]bp  |
| Urbanus proteus | [5260] | 05-SRNP-32459 | 669[0n]bp  |
| Urbanus proteus | [5261] | 04-SRNP-22087 | 669[0n]bp  |
| Urbanus proteus | [5262] | 03-SRNP-16631 | 669[0n]bp  |
| Urbanus proteus | [5263] | 03-SRNP-17441 | 669[0n]bp  |
| Urbanus proteus | [5264] | 07-SRNP-65360 | 669[0n]bp  |
| Urbanus proteus | [5265] | 08-SRNP-55989 | 669[0n]bp  |
| Urbanus proteus | [5266] | 08-SRNP-55990 | 669[0n]bp  |
| Urbanus proteus | [5267] | 02-SRNP-28070 | 663[0n]bp  |
| Urbanus proteus | [5268] | 04-SRNP-33890 | 669[0n]bp  |
| Urbanus proteus | [5269] | 06-SRNP-32779 | 609[0n]bp  |
| Urbanus proteus | [5270] | 97-SRNP-4502  | 618[0n]bp  |
| Urbanus proteus | [5271] | 04-SRNP-21999 | 669[0n]bp  |
| Urbanus proteus | [5272] | 04-SRNP-21804 | 654[1n]bp  |
| Urbanus proteus | [5273] | 07-SRNP-22160 | 666[0n]bp  |
| Urbanus proteus | [5274] | 02-SRNP-28876 | 633[0n]bp  |
| Urbanus proteus | [5275] | 05-SRNP-21817 | 669[0n]bp  |
| Urbanus proteus | [5276] | 02-SRNP-17496 | 633[0n]bp  |
| Urbanus proteus | [5277] | 03-SRNP-16618 | 612[0n]bp  |
| Urbanus proteus | [5278] | 94-SRNP-2742  | 615[0n]bp  |
| Urbanus proteus | [5279] | 94-SRNP-3012  | 603[1n]bp  |
| Urbanus proteus | [5280] | 01-SRNP-1156  | 666[0n]bp  |
| Urbanus proteus | [5281] | 03-SRNP-6987  | 657[0n]bp  |
| Urbanus proteus | [5282] | 01-SRNP-5597  | 669[0n]bp  |
| Urbanus proteus | [5283] | 03-SRNP-2029  | 669[0n]bp  |
| Urbanus proteus | [5284] | 02-SRNP-28921 | 669[0n]bp  |
| Urbanus proteus | [5285] | 06-SRNP-20652 | 669[0n]bp  |
| Urbanus proteus | [5286] | 08-SRNP-65133 | 669[0n]bp  |
| Urbanus proteus | [5287] | 02-SRNP-28879 | 669[1n]bp  |
| Urbanus proteus | [5288] | 04-SRNP-45319 | 669[1n]bp  |
| Urbanus proteus | [5289] | 03-SRNP-2585  | 651[1n]bp  |
| Urbanus proteus | [5290] | 04-SRNP-45322 | 669[0n]bp  |
| Urbanus proteus | [5291] | 04-SRNP-22092 | 669[0n]bp  |
| Urbanus proteus | [5292] | 04-SRNP-32060 | 669[0n]bp  |
| Urbanus proteus | [5293] | 03-SRNP-20447 | 669[0n]bp  |
| Urbanus proteus | [5294] | 06-SRNP-6068  | 669[0n]bp  |
| Urbanus proteus | [5295] | 06-SRNP-6067  | 669[0n]bp  |
| Urbanus proteus | [5296] | 02-SRNP-17493 | 669[0n]bp  |

|                 |        |               |           |
|-----------------|--------|---------------|-----------|
| Urbanus proteus | [5294] | 06-SRNP-6068  | 669[0n]bp |
| Urbanus proteus | [5295] | 06-SRNP-6067  | 669[0n]bp |
| Urbanus proteus | [5296] | 02-SRNP-17493 | 669[0n]bp |
| Urbanus proteus | [5297] | 02-SRNP-29476 | 669[0n]bp |
| Urbanus proteus | [5298] | 03-SRNP-16629 | 669[0n]bp |
| Urbanus proteus | [5299] | 02-SRNP-28091 | 669[0n]bp |
| Urbanus proteus | [5300] | 02-SRNP-17905 | 669[0n]bp |
| Urbanus proteus | [5301] | 02-SRNP-17917 | 669[0n]bp |
| Urbanus proteus | [5302] | 02-SRNP-17500 | 669[0n]bp |
| Urbanus proteus | [5303] | 04-SRNP-22439 | 669[0n]bp |
| Urbanus proteus | [5304] | 04-SRNP-22142 | 669[0n]bp |
| Urbanus proteus | [5305] | 04-SRNP-21276 | 669[0n]bp |
| Urbanus proteus | [5306] | 04-SRNP-45255 | 669[0n]bp |
| Urbanus proteus | [5307] | 04-SRNP-21421 | 669[0n]bp |
| Urbanus proteus | [5308] | 03-SRNP-16772 | 645[0n]bp |
| Urbanus proteus | [5309] | 02-SRNP-28089 | 669[0n]bp |
| Urbanus proteus | [5310] | 05-SRNP-42099 | 669[0n]bp |
| Urbanus proteus | [5311] | 04-SRNP-45328 | 669[1n]bp |
| Urbanus proteus | [5312] | 04-SRNP-21992 | 669[0n]bp |
| Urbanus proteus | [5313] | 04-SRNP-22095 | 669[0n]bp |
| Urbanus proteus | [5314] | 06-SRNP-20650 | 669[0n]bp |
| Urbanus proteus | [5315] | 02-SRNP-28763 | 669[0n]bp |
| Urbanus proteus | [5316] | 04-SRNP-21997 | 669[0n]bp |
| Urbanus proteus | [5317] | 04-SRNP-21991 | 645[0n]bp |
| Urbanus proteus | [5318] | 04-SRNP-21993 | 669[0n]bp |
| Urbanus proteus | [5319] | 03-SRNP-17430 | 666[0n]bp |
| Urbanus proteus | [5320] | 05-SRNP-22290 | 666[0n]bp |
| Urbanus proteus | [5321] | 07-SRNP-56187 | 666[0n]bp |
| Urbanus proteus | [5322] | 06-SRNP-22060 | 666[1n]bp |
| Urbanus proteus | [5323] | 06-SRNP-20672 | 669[0n]bp |
| Urbanus proteus | [5324] | 06-SRNP-32781 | 612[1n]bp |
| Urbanus proteus | [5325] | 02-SRNP-32259 | 627[0n]bp |
| Urbanus proteus | [5326] | 02-SRNP-1921  | 669[0n]bp |
| Urbanus proteus | [5327] | 03-SRNP-2512  | 639[0n]bp |
| Urbanus proteus | [5328] | 03-SRNP-16896 | 636[0n]bp |
| Urbanus proteus | [5329] | 03-SRNP-16625 | 669[0n]bp |
| Urbanus proteus | [5330] | 03-SRNP-16606 | 669[0n]bp |
| Urbanus proteus | [5331] | 02-SRNP-28094 | 669[0n]bp |
| Urbanus proteus | [5332] | 07-SRNP-32675 | 531[0n]bp |
| Urbanus proteus | [5333] | 08-SRNP-71996 | 669[0n]bp |
| Urbanus proteus | [5334] | 09-SRNP-70674 | 669[1n]bp |
| Urbanus proteus | [5335] | 02-SRNP-17909 | 669[0n]bp |
| Urbanus proteus | [5336] | 02-SRNP-17892 | 669[0n]bp |
| Urbanus proteus | [5337] | 06-SRNP-32816 | 669[0n]bp |
| Urbanus proteus | [5338] | 02-SRNP-15161 | 669[0n]bp |
| Urbanus proteus | [5339] | 06-SRNP-32782 | 669[0n]bp |
| Urbanus proteus | [5340] | 06-SRNP-32807 | 669[0n]bp |
| Urbanus proteus | [5341] | 06-SRNP-21095 | 669[0n]bp |
| Urbanus proteus | [5342] | 06-SRNP-20993 | 669[0n]bp |
| Urbanus proteus | [5343] | 06-SRNP-21060 | 669[0n]bp |
| Urbanus proteus | [5344] | 06-SRNP-21281 | 669[0n]bp |
| Urbanus proteus | [5345] | 06-SRNP-20649 | 669[0n]bp |
| Urbanus proteus | [5346] | 06-SRNP-21046 | 669[0n]bp |
| Urbanus proteus | [5347] | 05-SRNP-55628 | 669[0n]bp |
| Urbanus proteus | [5348] | 06-SRNP-30958 | 669[0n]bp |
| Urbanus proteus | [5349] | 05-SRNP-31865 | 669[0n]bp |
| Urbanus proteus | [5350] | 05-SRNP-41526 | 669[0n]bp |
| Urbanus proteus | [5351] | 05-SRNP-33815 | 669[0n]bp |
| Urbanus proteus | [5352] | 05-SRNP-46456 | 669[0n]bp |
| Urbanus proteus | [5353] | 02-SRNP-17495 | 669[0n]bp |
| Urbanus proteus | [5354] | 01-SRNP-12344 | 669[0n]bp |
| Urbanus proteus | [5355] | 02-SRNP-29166 | 669[0n]bp |
| Urbanus proteus | [5356] | 02-SRNP-17910 | 669[0n]bp |
| Urbanus proteus | [5357] | 02-SRNP-17902 | 669[0n]bp |
| Urbanus proteus | [5358] | 02-SRNP-28882 | 669[0n]bp |
| Urbanus proteus | [5359] | 02-SRNP-17499 | 669[0n]bp |
| Urbanus proteus | [5360] | 02-SRNP-17904 | 669[0n]bp |
| Urbanus proteus | [5361] | 01-SRNP-17048 | 669[0n]bp |
| Urbanus proteus | [5362] | 02-SRNP-17891 | 669[0n]bp |
| Urbanus proteus | [5363] | 01-SRNP-444   | 669[0n]bp |
| Urbanus proteus | [5364] | 01-SRNP-5650  | 669[0n]bp |
| Urbanus proteus | [5365] | 01-SRNP-448   | 669[0n]bp |
| Urbanus proteus | [5366] | 01-SRNP-12349 | 669[0n]bp |
| Urbanus proteus | [5367] | 01-SRNP-12371 | 669[0n]bp |
| Urbanus proteus | [5368] | 01-SRNP-449   | 669[0n]bp |
| Urbanus proteus | [5369] | 01-SRNP-12318 | 669[0n]bp |
| Urbanus proteus | [5370] | 01-SRNP-12370 | 669[0n]bp |
| Urbanus proteus | [5371] | 01-SRNP-12346 | 669[0n]bp |
| Urbanus proteus | [5372] | 01-SRNP-12345 | 669[0n]bp |
| Urbanus proteus | [5373] | 04-SRNP-45076 | 669[0n]bp |
| Urbanus proteus | [5374] | 03-SRNP-7405  | 669[0n]bp |
| Urbanus proteus | [5375] | 04-SRNP-45299 | 669[0n]bp |
| Urbanus proteus | [5376] | 04-SRNP-45323 | 669[0n]bp |
| Urbanus proteus | [5377] | 02-SRNP-31168 | 669[0n]bp |
| Urbanus proteus | [5378] | 02-SRNP-28914 | 669[0n]bp |
| Urbanus proteus | [5379] | 02-SRNP-16019 | 669[0n]bp |
| Urbanus proteus | [5380] | 02-SRNP-28092 | 669[0n]bp |
| Urbanus proteus | [5381] | 01-SRNP-446   | 669[0n]bp |
| Urbanus proteus | [5382] | 01-SRNP-917   | 669[0n]bp |
| Urbanus proteus | [5383] | 02-SRNP-17899 | 669[0n]bp |
| Urbanus proteus | [5384] | 02-SRNP-17918 | 669[0n]bp |
| Urbanus proteus | [5385] | 01-SRNP-447   | 669[0n]bp |
| Urbanus proteus | [5386] | 02-SRNP-17896 | 669[0n]bp |
| Urbanus proteus | [5387] | 01-SRNP-453   | 669[0n]bp |
| Urbanus proteus | [5388] | 01-SRNP-4731  | 669[0n]bp |
| Urbanus proteus | [5389] | 02-SRNP-15124 | 669[0n]bp |
| Urbanus proteus | [5390] | 01-SRNP-12352 | 669[0n]bp |
| Urbanus proteus | [5391] | 06-SRNP-33586 | 669[0n]bp |
| Urbanus proteus | [5392] | 06-SRNP-33301 | 669[0n]bp |
| Urbanus proteus | [5393] | 06-SRNP-32780 | 669[0n]bp |
| Urbanus proteus | [5394] | 06-SRNP-32342 | 669[0n]bp |
| Urbanus proteus | [5395] | 06-SRNP-21280 | 669[0n]bp |
| Urbanus proteus | [5396] | 06-SRNP-20994 | 669[0n]bp |

|                 |        |               |           |
|-----------------|--------|---------------|-----------|
| Urbanus proteus | [5394] | 06-SRNP-32342 | 669[0n]bp |
| Urbanus proteus | [5395] | 06-SRNP-21280 | 669[0n]bp |
| Urbanus proteus | [5396] | 06-SRNP-20994 | 669[0n]bp |
| Urbanus proteus | [5397] | 06-SRNP-31653 | 669[0n]bp |
| Urbanus proteus | [5398] | 06-SRNP-20991 | 669[0n]bp |
| Urbanus proteus | [5399] | 05-SRNP-24255 | 669[0n]bp |
| Urbanus proteus | [5400] | 06-SRNP-45207 | 669[0n]bp |
| Urbanus proteus | [5401] | 05-SRNP-32492 | 669[0n]bp |
| Urbanus proteus | [5402] | 05-SRNP-32595 | 669[0n]bp |
| Urbanus proteus | [5403] | 05-SRNP-42295 | 669[0n]bp |
| Urbanus proteus | [5404] | 05-SRNP-31008 | 669[0n]bp |
| Urbanus proteus | [5405] | 02-SRNP-15154 | 669[0n]bp |
| Urbanus proteus | [5406] | 04-SRNP-12474 | 669[0n]bp |
| Urbanus proteus | [5407] | 02-SRNP-17907 | 669[0n]bp |
| Urbanus proteus | [5408] | 02-SRNP-29478 | 669[0n]bp |
| Urbanus proteus | [5409] | 04-SRNP-22006 | 669[0n]bp |
| Urbanus proteus | [5410] | 03-SRNP-16908 | 669[0n]bp |
| Urbanus proteus | [5411] | 03-SRNP-16781 | 669[0n]bp |
| Urbanus proteus | [5412] | 03-SRNP-16617 | 669[0n]bp |
| Urbanus proteus | [5413] | 03-SRNP-2586  | 669[0n]bp |
| Urbanus proteus | [5414] | 03-SRNP-16902 | 669[0n]bp |
| Urbanus proteus | [5415] | 03-SRNP-8110  | 669[0n]bp |
| Urbanus proteus | [5416] | 03-SRNP-2945  | 669[0n]bp |
| Urbanus proteus | [5417] | 03-SRNP-16897 | 669[0n]bp |
| Urbanus proteus | [5418] | 03-SRNP-2584  | 669[0n]bp |
| Urbanus proteus | [5419] | 04-SRNP-22103 | 669[0n]bp |
| Urbanus proteus | [5420] | 03-SRNP-2108  | 669[0n]bp |
| Urbanus proteus | [5421] | 04-SRNP-22000 | 669[0n]bp |
| Urbanus proteus | [5422] | 04-SRNP-21996 | 669[0n]bp |
| Urbanus proteus | [5423] | 04-SRNP-22004 | 669[0n]bp |
| Urbanus proteus | [5424] | 04-SRNP-45366 | 669[0n]bp |
| Urbanus proteus | [5425] | 04-SRNP-32097 | 669[0n]bp |
| Urbanus proteus | [5426] | 04-SRNP-22008 | 669[0n]bp |
| Urbanus proteus | [5427] | 03-SRNP-16893 | 669[0n]bp |
| Urbanus proteus | [5428] | 03-SRNP-16899 | 669[0n]bp |
| Urbanus proteus | [5429] | 03-SRNP-16635 | 669[0n]bp |
| Urbanus proteus | [5430] | 03-SRNP-16774 | 669[0n]bp |
| Urbanus proteus | [5431] | 03-SRNP-2535  | 669[0n]bp |
| Urbanus proteus | [5432] | 03-SRNP-16624 | 669[0n]bp |
| Urbanus proteus | [5433] | 02-SRNP-15147 | 669[0n]bp |
| Urbanus proteus | [5434] | 03-SRNP-2027  | 669[0n]bp |
| Urbanus proteus | [5435] | 02-SRNP-28073 | 669[0n]bp |
| Urbanus proteus | [5436] | 02-SRNP-7152  | 669[0n]bp |
| Urbanus proteus | [5437] | 02-SRNP-17906 | 669[0n]bp |
| Urbanus proteus | [5438] | 01-SRNP-976   | 669[0n]bp |
| Urbanus proteus | [5439] | 02-SRNP-17901 | 669[0n]bp |
| Urbanus proteus | [5440] | 02-SRNP-28917 | 669[0n]bp |
| Urbanus proteus | [5441] | 02-SRNP-28874 | 669[0n]bp |
| Urbanus proteus | [5442] | 02-SRNP-17911 | 669[0n]bp |
| Urbanus proteus | [5443] | 03-SRNP-2940  | 669[0n]bp |
| Urbanus proteus | [5444] | 03-SRNP-16894 | 669[0n]bp |
| Urbanus proteus | [5445] | 03-SRNP-19131 | 669[0n]bp |
| Urbanus proteus | [5446] | 03-SRNP-2367  | 669[0n]bp |
| Urbanus proteus | [5447] | 03-SRNP-2588  | 669[0n]bp |
| Urbanus proteus | [5448] | 03-SRNP-2028  | 669[0n]bp |
| Urbanus proteus | [5449] | 04-SRNP-22090 | 669[0n]bp |
| Urbanus proteus | [5450] | 04-SRNP-22089 | 669[0n]bp |
| Urbanus proteus | [5451] | 03-SRNP-2093  | 669[0n]bp |
| Urbanus proteus | [5452] | 04-SRNP-22002 | 669[0n]bp |
| Urbanus proteus | [5453] | 03-SRNP-20714 | 669[0n]bp |
| Urbanus proteus | [5454] | 03-SRNP-16616 | 669[0n]bp |
| Urbanus proteus | [5455] | 04-SRNP-45332 | 669[0n]bp |
| Urbanus proteus | [5456] | 03-SRNP-18903 | 669[0n]bp |
| Urbanus proteus | [5457] | 02-SRNP-28096 | 669[0n]bp |
| Urbanus proteus | [5458] | 02-SRNP-28071 | 669[0n]bp |
| Urbanus proteus | [5459] | 02-SRNP-17898 | 669[0n]bp |
| Urbanus proteus | [5460] | 02-SRNP-15366 | 669[0n]bp |
| Urbanus proteus | [5461] | 02-SRNP-28090 | 669[0n]bp |
| Urbanus proteus | [5462] | 02-SRNP-1917  | 669[0n]bp |
| Urbanus proteus | [5463] | 03-SRNP-16594 | 669[0n]bp |
| Urbanus proteus | [5464] | 03-SRNP-17445 | 669[0n]bp |
| Urbanus proteus | [5465] | 03-SRNP-16769 | 669[0n]bp |
| Urbanus proteus | [5466] | 03-SRNP-16898 | 669[0n]bp |
| Urbanus proteus | [5467] | 03-SRNP-2030  | 669[0n]bp |
| Urbanus proteus | [5468] | 03-SRNP-2112  | 669[0n]bp |
| Urbanus proteus | [5469] | 03-SRNP-2583  | 669[0n]bp |
| Urbanus proteus | [5470] | 04-SRNP-21995 | 669[0n]bp |
| Urbanus proteus | [5471] | 03-SRNP-2537  | 669[0n]bp |
| Urbanus proteus | [5472] | 03-SRNP-16770 | 669[0n]bp |
| Urbanus proteus | [5473] | 03-SRNP-15468 | 669[0n]bp |
| Urbanus proteus | [5474] | 03-SRNP-2944  | 669[0n]bp |
| Urbanus proteus | [5475] | 03-SRNP-2536  | 669[0n]bp |
| Urbanus proteus | [5476] | 03-SRNP-2582  | 669[0n]bp |
| Urbanus proteus | [5477] | 03-SRNP-16634 | 669[0n]bp |
| Urbanus proteus | [5478] | 03-SRNP-17406 | 669[0n]bp |
| Urbanus proteus | [5479] | 09-SRNP-70673 | 669[0n]bp |
| Urbanus proteus | [5480] | 09-SRNP-70675 | 669[0n]bp |
| Urbanus proteus | [5481] | 09-SRNP-44562 | 669[0n]bp |
| Urbanus proteus | [5482] | 09-SRNP-70361 | 669[0n]bp |
| Urbanus proteus | [5483] | 09-SRNP-70360 | 669[0n]bp |
| Urbanus proteus | [5484] | 09-SRNP-44561 | 669[0n]bp |
| Urbanus proteus | [5485] | 09-SRNP-44385 | 669[0n]bp |
| Urbanus proteus | [5486] | 09-SRNP-44317 | 669[0n]bp |
| Urbanus proteus | [5487] | 08-SRNP-72574 | 669[0n]bp |
| Urbanus proteus | [5488] | 08-SRNP-72588 | 669[0n]bp |
| Urbanus proteus | [5489] | 08-SRNP-71676 | 669[0n]bp |
| Urbanus proteus | [5490] | 08-SRNP-71995 | 669[0n]bp |
| Urbanus proteus | [5491] | 08-SRNP-45057 | 669[0n]bp |
| Urbanus proteus | [5492] | 08-SRNP-45169 | 669[0n]bp |
| Urbanus proteus | [5493] | 08-SRNP-71277 | 669[0n]bp |
| Urbanus proteus | [5494] | 08-SRNP-1259  | 669[0n]bp |
| Urbanus proteus | [5495] | 08-SRNP-65631 | 669[0n]bp |
| Urbanus proteus | [5496] | 08-SRNP-65632 | 669[0n]bp |



|                    |        |                 |           |
|--------------------|--------|-----------------|-----------|
| Urbanus proteus    | [5494] | 08-SRNP-1259    | 669[0n]bp |
| Urbanus proteus    | [5495] | 08-SRNP-65631   | 669[0n]bp |
| Urbanus proteus    | [5496] | 08-SRNP-65632   | 669[0n]bp |
| Urbanus proteus    | [5497] | 08-SRNP-65633   | 669[0n]bp |
| Urbanus proteus    | [5498] | 08-SRNP-65634   | 669[0n]bp |
| Urbanus proteus    | [5499] | 07-SRNP-65419   | 669[0n]bp |
| Urbanus proteus    | [5500] | 08-SRNP-65052   | 669[0n]bp |
| Urbanus proteus    | [5501] | 07-SRNP-57891   | 669[0n]bp |
| Urbanus proteus    | [5502] | 07-SRNP-65273   | 669[0n]bp |
| Urbanus proteus    | [5503] | 07-SRNP-1369    | 669[0n]bp |
| Urbanus proteus    | [5504] | 07-SRNP-56212   | 669[0n]bp |
| Urbanus proteus    | [5505] | 07-SRNP-20079   | 669[0n]bp |
| Urbanus proteus    | [5506] | 07-SRNP-20455   | 669[0n]bp |
| Urbanus proteus    | [5507] | 02-SRNP-5760    | 669[0n]bp |
| Urbanus proteus    | [5508] | 02-SRNP-29402   | 669[0n]bp |
| Urbanus proteus    | [5509] | 07-SRNP-55788   | 669[0n]bp |
| Urbanus proteus    | [5510] | 07-SRNP-56167   | 669[0n]bp |
| Urbanus proteus    | [5511] | 07-SRNP-32038   | 669[0n]bp |
| Urbanus proteus    | [5512] | 07-SRNP-20045   | 669[0n]bp |
| Urbanus proteus    | [5513] | 02-SRNP-15127   | 669[0n]bp |
| Urbanus proteus    | [5514] | 02-SRNP-28881   | 669[0n]bp |
| Urbanus proteus    | [5515] | 02-SRNP-28760   | 669[0n]bp |
| Urbanus proteus    | [5516] | 97-SRNP-4472    | 669[0n]bp |
| Urbanus proteus    | [5517] | 02-SRNP-17913   | 669[0n]bp |
| Urbanus proteus    | [5518] | 02-SRNP-2958    | 669[0n]bp |
| Urbanus proteus    | [5519] | 01-SRNP-1274    | 669[0n]bp |
| Urbanus proteus    | [5520] | 02-SRNP-14208   | 669[0n]bp |
| Urbanus proteus    | [5521] | 02-SRNP-15153   | 669[0n]bp |
| Urbanus proteus    | [5522] | 01-SRNP-450     | 669[0n]bp |
| Urbanus proteus    | [5523] | 02-SRNP-15121   | 669[0n]bp |
| Urbanus proteus    | [5524] | 02-SRNP-15567   | 669[0n]bp |
| Urbanus proteus    | [5525] | 02-SRNP-15155   | 669[0n]bp |
| Urbanus proteus    | [5526] | 02-SRNP-2957    | 669[0n]bp |
| Urbanus proteus    | [5527] | 02-SRNP-29165   | 669[0n]bp |
| Urbanus proteus    | [5528] | 97-SRNP-9660    | 669[0n]bp |
| Urbanus proteus    | [5529] | 01-SRNP-12350   | 669[0n]bp |
| Urbanus proteus    | [5530] | 01-SRNP-445     | 669[0n]bp |
| Urbanus proteus    | [5531] | 02-SRNP-17908   | 669[0n]bp |
| Urbanus proteus    | [5532] | 01-SRNP-977     | 669[0n]bp |
| Urbanus proteus    | [5533] | 01-SRNP-451     | 669[0n]bp |
| Urbanus proteus    | [5534] | 01-SRNP-981     | 669[0n]bp |
| Urbanus proteus    | [5535] | 02-SRNP-28762   | 669[0n]bp |
| Urbanus proteus    | [5536] | 02-SRNP-28920   | 669[0n]bp |
| Urbanus proteus    | [5537] | 03-SRNP-16599   | 669[0n]bp |
| Urbanus proteus    | [5538] | 01-SRNP-1273    | 669[0n]bp |
| Urbanus proteus    | [5539] | 04-SRNP-45304   | 669[0n]bp |
| Urbanus proteus    | [5540] | 04-SRNP-45579   | 669[0n]bp |
| Urbanus proteus    | [5541] | 03-SRNP-17056   | 669[0n]bp |
| Urbanus proteus    | [5542] | 03-SRNP-20455   | 669[0n]bp |
| Urbanus proteus    | [5543] | 04-SRNP-45408   | 669[0n]bp |
| Urbanus proteus    | [5544] | 03-SRNP-16784   | 669[0n]bp |
| Urbanus proteus    | [5545] | 04-SRNP-45364   | 669[0n]bp |
| Urbanus proteus    | [5546] | 04-SRNP-1039    | 669[0n]bp |
| Urbanus proteus    | [5547] | 04-SRNP-45324   | 669[0n]bp |
| Urbanus proteus    | [5548] | 04-SRNP-45365   | 669[0n]bp |
| Urbanus proteus    | [5549] | 04-SRNP-22001   | 669[0n]bp |
| Urbanus proteus    | [5550] | 04-SRNP-22021   | 669[0n]bp |
| Urbanus proteus    | [5551] | 03-SRNP-16641   | 669[0n]bp |
| Urbanus proteus    | [5552] | 03-SRNP-16603   | 669[0n]bp |
| Urbanus proteus    | [5553] | 03-SRNP-16627   | 669[0n]bp |
| Urbanus proteus    | [5554] | 03-SRNP-16620   | 669[0n]bp |
| Urbanus proteus    | [5555] | 03-SRNP-16891   | 669[0n]bp |
| Urbanus proteus    | [5556] | 03-SRNP-16640   | 669[0n]bp |
| Urbanus proteus    | [5557] | 07-SRNP-21374   | 669[0n]bp |
| Urbanus proteus    | [5558] | 07-SRNP-22165   | 669[0n]bp |
| Urbanus proteus    | [5559] | 07-SRNP-1159    | 669[0n]bp |
| Urbanus proteus    | [5560] | 07-SRNP-3075    | 669[0n]bp |
| Urbanus proteus    | [5561] | 07-SRNP-21822   | 669[0n]bp |
| Urbanus proteus    | [5562] | 07-SRNP-45406   | 669[0n]bp |
| Urbanus proteus    | [5563] | 07-SRNP-56883   | 669[0n]bp |
| Urbanus proteus    | [5564] | 07-SRNP-57878   | 669[0n]bp |
| Urbanus proteus    | [5565] | 07-SRNP-65274   | 669[0n]bp |
| Urbanus proteus    | [5566] | 07-SRNP-65275   | 669[0n]bp |
| Urbanus proteus    | [5567] | 08-SRNP-65195   | 669[0n]bp |
| Urbanus proteus    | [5568] | 08-SRNP-55985   | 669[0n]bp |
| Urbanus proteus    | [5569] | 08-SRNP-55979   | 669[0n]bp |
| Urbanus proteus    | [5570] | 08-SRNP-65630   | 669[0n]bp |
| Urbanus proteus    | [5571] | 09-SRNP-57115   | 669[0n]bp |
| Urbanus proteus    | [5572] | 09-SRNP-75601   | 669[0n]bp |
| Urbanus bellidHJ02 | [5573] | 04-SRNP-45491   | 669[0n]bp |
| Urbanus bellidHJ02 | [5574] | 03-SRNP-12624.1 | 669[0n]bp |
| Urbanus bellidHJ02 | [5575] | 03-SRNP-12634.1 | 669[0n]bp |
| Urbanus bellidHJ02 | [5576] | 06-SRNP-47816   | 669[0n]bp |
| Urbanus bellidHJ02 | [5577] | 07-SRNP-45071   | 666[0n]bp |
| Urbanus bellidHJ02 | [5578] | 06-SRNP-30895   | 669[0n]bp |
| Urbanus bellidHJ02 | [5579] | 95-SRNP-10572   | 669[0n]bp |
| Urbanus bellidHJ02 | [5580] | 01-SRNP-2952    | 669[0n]bp |
| Urbanus bellidHJ02 | [5581] | 01-SRNP-4475    | 669[0n]bp |
| Urbanus bellidHJ02 | [5582] | 01-SRNP-487     | 669[0n]bp |
| Urbanus bellidHJ02 | [5583] | 06-SRNP-3621    | 669[0n]bp |
| Urbanus bellidHJ02 | [5584] | 07-SRNP-40856   | 669[0n]bp |
| Urbanus bellidHJ02 | [5585] | 06-SRNP-47814   | 630[0n]bp |
| Urbanus bellidHJ02 | [5586] | 06-SRNP-30896   | 669[0n]bp |
| Urbanus bellidHJ02 | [5587] | 06-SRNP-46174   | 669[0n]bp |
| Urbanus bellidHJ02 | [5588] | 06-SRNP-46171   | 645[0n]bp |
| Urbanus bellidHJ02 | [5589] | 06-SRNP-57638   | 609[0n]bp |
| Urbanus bellidHJ02 | [5590] | 02-SRNP-1417    | 669[0n]bp |
| Urbanus bellidHJ02 | [5591] | 04-SRNP-45586   | 669[0n]bp |
| Urbanus bellidHJ02 | [5592] | 95-SRNP-6826    | 669[0n]bp |
| Urbanus bellidHJ02 | [5593] | 02-SRNP-954     | 669[0n]bp |
| Urbanus bellidHJ02 | [5594] | 04-SRNP-14877   | 669[0n]bp |
| Urbanus bellidHJ02 | [5595] | 04-SRNP-49377   | 669[0n]bp |
| Urbanus bellidHJ02 | [5596] | 04-SRNP-15474   | 669[0n]bp |

```

Urbanus belliDHJ02|[5594]|04-SRNP-14877|669[0n]bp
Urbanus belliDHJ02|[5595]|04-SRNP-49377|669[0n]bp
Urbanus belliDHJ02|[5596]|04-SRNP-15474|669[0n]bp
Urbanus belliDHJ02|[5597]|04-SRNP-15145|669[0n]bp
Urbanus belliDHJ02|[5598]|04-SRNP-48357|669[0n]bp
Urbanus belliDHJ02|[5599]|04-SRNP-47954|669[0n]bp
Urbanus belliDHJ02|[5600]|04-SRNP-14569|669[0n]bp
Urbanus belliDHJ02|[5601]|02-SRNP-32172|669[0n]bp
Urbanus belliDHJ02|[5602]|02-SRNP-392|669[0n]bp
Urbanus belliDHJ02|[5603]|02-SRNP-166|669[0n]bp
Urbanus belliDHJ02|[5604]|04-SRNP-20968|669[0n]bp
Urbanus belliDHJ02|[5605]|04-SRNP-20876|669[0n]bp
Urbanus belliDHJ02|[5606]|05-SRNP-59447|669[1n]bp
Urbanus belliDHJ02|[5607]|06-SRNP-47801|609[0n]bp
Urbanus belliDHJ02|[5608]|02-SRNP-1026|669[0n]bp
Urbanus belliDHJ02|[5609]|03-SRNP-12592|669[0n]bp
Urbanus belliDHJ02|[5610]|06-SRNP-46184|666[0n]bp
Urbanus belliDHJ02|[5611]|07-SRNP-55283|669[0n]bp
Urbanus belliDHJ02|[5612]|04-SRNP-45494|669[0n]bp
Urbanus belliDHJ02|[5613]|05-SRNP-1832|669[0n]bp
Urbanus belliDHJ02|[5614]|05-SRNP-47043|669[0n]bp
Urbanus belliDHJ02|[5615]|05-SRNP-47231|669[0n]bp
Urbanus belliDHJ02|[5616]|06-SRNP-2662|669[0n]bp
Urbanus belliDHJ02|[5617]|05-SRNP-19630|669[0n]bp
Urbanus belliDHJ02|[5618]|05-SRNP-59448|669[0n]bp
Urbanus belliDHJ02|[5619]|05-SRNP-59444|669[0n]bp
Urbanus belliDHJ02|[5620]|04-SRNP-45492|669[0n]bp
Urbanus belliDHJ02|[5621]|03-SRNP-29774|669[0n]bp
Urbanus belliDHJ02|[5622]|06-SRNP-2658|669[0n]bp
Urbanus belliDHJ02|[5623]|06-SRNP-46172|669[0n]bp
Urbanus belliDHJ02|[5624]|06-SRNP-46486|669[0n]bp
Urbanus belliDHJ02|[5625]|06-SRNP-46572|669[0n]bp
Urbanus belliDHJ02|[5626]|06-SRNP-46179|669[0n]bp
Urbanus belliDHJ02|[5627]|06-SRNP-46315|669[0n]bp
Urbanus belliDHJ02|[5628]|06-SRNP-6511|669[0n]bp
Urbanus belliDHJ02|[5629]|06-SRNP-46639|669[0n]bp
Urbanus belliDHJ02|[5630]|06-SRNP-46460|669[0n]bp
Urbanus belliDHJ02|[5631]|06-SRNP-47817|669[0n]bp
Urbanus belliDHJ02|[5632]|07-SRNP-40676|669[0n]bp
Urbanus belliDHJ02|[5633]|07-SRNP-30613|669[0n]bp
Urbanus belliDHJ02|[5634]|07-SRNP-56829|669[0n]bp
Urbanus belliDHJ02|[5635]|07-SRNP-56547|669[0n]bp
Urbanus belliDHJ02|[5636]|07-SRNP-30615|669[0n]bp
Urbanus belliDHJ02|[5637]|07-SRNP-20318|669[0n]bp
Urbanus belliDHJ02|[5638]|06-SRNP-18276|669[0n]bp
Urbanus belliDHJ02|[5639]|07-SRNP-57868|669[0n]bp
Urbanus belliDHJ02|[5640]|08-SRNP-31826|669[0n]bp
Urbanus viterboana|[5641]|03-SRNP-23514|669[0n]bp
Urbanus viterboana|[5642]|01-SRNP-21478|669[0n]bp
Urbanus viterboana|[5643]|01-SRNP-21220|669[0n]bp
Urbanus viterboana|[5644]|99-SRNP-363|669[0n]bp
Urbanus viterboana|[5645]|03-SRNP-23516|669[0n]bp
Urbanus viterboana|[5646]|06-SRNP-35186|669[0n]bp
Urbanus viterboana|[5647]|05-SRNP-35999|660[0n]bp
Urbanus viterboana|[5648]|01-SRNP-21475|669[0n]bp
Urbanus viterboana|[5649]|01-SRNP-21228|669[0n]bp
Urbanus viterboana|[5650]|01-SRNP-21233|627[0n]bp
Urbanus viterboana|[5651]|01-SRNP-21223|669[0n]bp
Urbanus viterboana|[5652]|99-SRNP-366|669[0n]bp
Urbanus viterboana|[5653]|05-SRNP-35553|669[0n]bp
Urbanus viterboana|[5654]|06-SRNP-35190|669[0n]bp
Urbanus viterboana|[5655]|07-SRNP-35463|669[0n]bp
Urbanus viterboana|[5656]|07-SRNP-35538|669[0n]bp
Urbanus viterboana|[5657]|08-SRNP-35218|669[0n]bp
Urbanus belliDHJ03|[5658]|03-SRNP-12654.1|669[0n]bp
Urbanus belliDHJ03|[5659]|06-SRNP-31264|324[0n]bp
Urbanus belliDHJ03|[5660]|07-SRNP-1121|645[0n]bp
Urbanus belliDHJ03|[5661]|07-SRNP-1122|645[0n]bp
Urbanus belliDHJ03|[5662]|06-SRNP-65065|660[0n]bp
Urbanus belliDHJ03|[5663]|07-SRNP-33182|660[0n]bp
Urbanus belliDHJ03|[5664]|08-SRNP-65993|669[0n]bp
Urbanus belliDHJ03|[5665]|08-SRNP-66028|669[0n]bp
Urbanus belliDHJ03|[5666]|07-SRNP-33183|669[0n]bp
Urbanus belliDHJ03|[5667]|07-SRNP-33184|669[0n]bp
Urbanus belliDHJ03|[5668]|07-SRNP-287|669[0n]bp
Urbanus belliDHJ03|[5669]|07-SRNP-40761|669[0n]bp
Urbanus belliDHJ03|[5670]|06-SRNP-46887|669[0n]bp
Urbanus belliDHJ03|[5671]|06-SRNP-7473|669[0n]bp
Urbanus belliDHJ03|[5672]|06-SRNP-46891|669[0n]bp
Urbanus belliDHJ03|[5673]|05-SRNP-7209|669[0n]bp
Urbanus belliDHJ03|[5674]|05-SRNP-40545|669[0n]bp
Urbanus belliDHJ03|[5675]|05-SRNP-41753|669[0n]bp
Urbanus belliDHJ03|[5676]|03-SRNP-12629.1|669[0n]bp
Urbanus belliDHJ03|[5677]|03-SRNP-10927|669[0n]bp
Urbanus belliDHJ03|[5678]|03-SRNP-12109.1|669[0n]bp
Urbanus belliDHJ03|[5679]|03-SRNP-10327|669[0n]bp
Urbanus belliDHJ03|[5680]|03-SRNP-12655.1|669[0n]bp
Urbanus belliDHJ03|[5681]|99-SRNP-5541|669[0n]bp
Urbanus belliDHJ03|[5682]|01-SRNP-23227|669[0n]bp
Urbanus belliDHJ03|[5683]|04-SRNP-42794|669[0n]bp
Urbanus belliDHJ03|[5684]|01-SRNP-22184|669[0n]bp
Urbanus belliDHJ03|[5685]|01-SRNP-23228|669[0n]bp
Urbanus belliDHJ03|[5686]|01-SRNP-2104|669[0n]bp
Urbanus belliDHJ03|[5687]|02-SRNP-7163|669[0n]bp
Urbanus belliDHJ03|[5688]|05-SRNP-42394|639[0n]bp
Urbanus belliDHJ03|[5689]|06-SRNP-43129|384[0n]bp
Urbanus belliDHJ03|[5690]|09-SRNP-57089|669[0n]bp
Urbanus belliDHJ01|[5691]|04-SRNP-49713|669[0n]bp
Urbanus belliDHJ01|[5692]|04-SRNP-49711|669[0n]bp
Urbanus belliDHJ01|[5693]|05-SRNP-49623|381[0n]bp
Urbanus belliDHJ01|[5694]|01-SRNP-22185|669[0n]bp
Urbanus belliDHJ01|[5695]|05-SRNP-43429|669[0n]bp
Urbanus belliDHJ01|[5696]|06-SRNP-31091|669[0n]bp

```

|         |            |        |                 |           |
|---------|------------|--------|-----------------|-----------|
| Urbanus | belliDHJ01 | [5694] | 01-SRNP-22185   | 669[0n]bp |
| Urbanus | belliDHJ01 | [5695] | 05-SRNP-43429   | 669[0n]bp |
| Urbanus | belliDHJ01 | [5696] | 06-SRNP-31091   | 669[0n]bp |
| Urbanus | belliDHJ01 | [5697] | 06-SRNP-46459   | 630[0n]bp |
| Urbanus | belliDHJ01 | [5698] | 06-SRNP-19690   | 618[1n]bp |
| Urbanus | belliDHJ01 | [5699] | 07-SRNP-1053    | 633[0n]bp |
| Urbanus | belliDHJ01 | [5700] | 06-SRNP-47304   | 645[0n]bp |
| Urbanus | belliDHJ01 | [5701] | 07-SRNP-23883   | 633[1n]bp |
| Urbanus | belliDHJ01 | [5702] | 06-SRNP-46173   | 627[0n]bp |
| Urbanus | belliDHJ01 | [5703] | 06-SRNP-48039   | 609[0n]bp |
| Urbanus | belliDHJ01 | [5704] | 98-SRNP-4170    | 669[0n]bp |
| Urbanus | belliDHJ01 | [5705] | 05-SRNP-47230   | 669[0n]bp |
| Urbanus | belliDHJ01 | [5706] | 05-SRNP-42614   | 669[2n]bp |
| Urbanus | belliDHJ01 | [5707] | 07-SRNP-45068   | 660[0n]bp |
| Urbanus | belliDHJ01 | [5708] | 06-SRNP-47295   | 666[0n]bp |
| Urbanus | belliDHJ01 | [5709] | 06-SRNP-31265   | 666[0n]bp |
| Urbanus | belliDHJ01 | [5710] | 05-SRNP-60977   | 666[0n]bp |
| Urbanus | belliDHJ01 | [5711] | 05-SRNP-42873   | 666[0n]bp |
| Urbanus | belliDHJ01 | [5712] | 06-SRNP-40907   | 666[0n]bp |
| Urbanus | belliDHJ01 | [5713] | 07-SRNP-20462   | 660[0n]bp |
| Urbanus | belliDHJ01 | [5714] | 96-SRNP-11569   | 654[0n]bp |
| Urbanus | belliDHJ01 | [5715] | 07-SRNP-41187   | 654[1n]bp |
| Urbanus | belliDHJ01 | [5716] | 08-SRNP-1439    | 669[0n]bp |
| Urbanus | belliDHJ01 | [5717] | 08-SRNP-65153   | 669[0n]bp |
| Urbanus | belliDHJ01 | [5718] | 07-SRNP-65582   | 669[0n]bp |
| Urbanus | belliDHJ01 | [5719] | 07-SRNP-33232   | 669[0n]bp |
| Urbanus | belliDHJ01 | [5720] | 07-SRNP-1119    | 669[0n]bp |
| Urbanus | belliDHJ01 | [5721] | 07-SRNP-42421   | 669[0n]bp |
| Urbanus | belliDHJ01 | [5722] | 07-SRNP-42423   | 669[0n]bp |
| Urbanus | belliDHJ01 | [5723] | 07-SRNP-31148   | 669[0n]bp |
| Urbanus | belliDHJ01 | [5724] | 07-SRNP-31150   | 669[0n]bp |
| Urbanus | belliDHJ01 | [5725] | 07-SRNP-20874   | 669[0n]bp |
| Urbanus | belliDHJ01 | [5726] | 07-SRNP-31149   | 669[0n]bp |
| Urbanus | belliDHJ01 | [5727] | 07-SRNP-20875   | 669[0n]bp |
| Urbanus | belliDHJ01 | [5728] | 07-SRNP-30807   | 669[0n]bp |
| Urbanus | belliDHJ01 | [5729] | 07-SRNP-30614   | 669[0n]bp |
| Urbanus | belliDHJ01 | [5730] | 07-SRNP-45090   | 669[0n]bp |
| Urbanus | belliDHJ01 | [5731] | 07-SRNP-45088   | 669[0n]bp |
| Urbanus | belliDHJ01 | [5732] | 07-SRNP-40762   | 669[0n]bp |
| Urbanus | belliDHJ01 | [5733] | 07-SRNP-30617   | 669[0n]bp |
| Urbanus | belliDHJ01 | [5734] | 06-SRNP-60091   | 669[0n]bp |
| Urbanus | belliDHJ01 | [5735] | 06-SRNP-47955   | 669[0n]bp |
| Urbanus | belliDHJ01 | [5736] | 06-SRNP-59197   | 669[0n]bp |
| Urbanus | belliDHJ01 | [5737] | 06-SRNP-46570   | 669[0n]bp |
| Urbanus | belliDHJ01 | [5738] | 06-SRNP-46180   | 669[0n]bp |
| Urbanus | belliDHJ01 | [5739] | 06-SRNP-46176   | 669[0n]bp |
| Urbanus | belliDHJ01 | [5740] | 06-SRNP-47233   | 669[0n]bp |
| Urbanus | belliDHJ01 | [5741] | 06-SRNP-7474    | 669[0n]bp |
| Urbanus | belliDHJ01 | [5742] | 06-SRNP-6164    | 669[0n]bp |
| Urbanus | belliDHJ01 | [5743] | 06-SRNP-46703   | 669[0n]bp |
| Urbanus | belliDHJ01 | [5744] | 06-SRNP-7378    | 669[0n]bp |
| Urbanus | belliDHJ01 | [5745] | 06-SRNP-46183   | 669[0n]bp |
| Urbanus | belliDHJ01 | [5746] | 06-SRNP-46487   | 669[0n]bp |
| Urbanus | belliDHJ01 | [5747] | 06-SRNP-46333   | 669[0n]bp |
| Urbanus | belliDHJ01 | [5748] | 06-SRNP-43281   | 669[0n]bp |
| Urbanus | belliDHJ01 | [5749] | 06-SRNP-32923   | 669[0n]bp |
| Urbanus | belliDHJ01 | [5750] | 06-SRNP-46181   | 669[0n]bp |
| Urbanus | belliDHJ01 | [5751] | 06-SRNP-5512    | 669[0n]bp |
| Urbanus | belliDHJ01 | [5752] | 06-SRNP-30699   | 669[0n]bp |
| Urbanus | belliDHJ01 | [5753] | 06-SRNP-3004    | 669[0n]bp |
| Urbanus | belliDHJ01 | [5754] | 06-SRNP-2656    | 669[0n]bp |
| Urbanus | belliDHJ01 | [5755] | 05-SRNP-43001   | 669[0n]bp |
| Urbanus | belliDHJ01 | [5756] | 06-SRNP-40981   | 669[0n]bp |
| Urbanus | belliDHJ01 | [5757] | 06-SRNP-2074    | 669[0n]bp |
| Urbanus | belliDHJ01 | [5758] | 06-SRNP-2199    | 669[0n]bp |
| Urbanus | belliDHJ01 | [5759] | 06-SRNP-30737   | 669[0n]bp |
| Urbanus | belliDHJ01 | [5760] | 05-SRNP-40888   | 669[0n]bp |
| Urbanus | belliDHJ01 | [5761] | 05-SRNP-45196   | 669[0n]bp |
| Urbanus | belliDHJ01 | [5762] | 05-SRNP-42399   | 669[0n]bp |
| Urbanus | belliDHJ01 | [5763] | 05-SRNP-40898   | 669[0n]bp |
| Urbanus | belliDHJ01 | [5764] | 05-SRNP-47058   | 669[0n]bp |
| Urbanus | belliDHJ01 | [5765] | 05-SRNP-42700   | 669[0n]bp |
| Urbanus | belliDHJ01 | [5766] | 05-SRNP-47229   | 669[0n]bp |
| Urbanus | belliDHJ01 | [5767] | 05-SRNP-20694   | 669[0n]bp |
| Urbanus | belliDHJ01 | [5768] | 05-SRNP-47232   | 669[0n]bp |
| Urbanus | belliDHJ01 | [5769] | 04-SRNP-4302    | 669[0n]bp |
| Urbanus | belliDHJ01 | [5770] | 04-SRNP-21913   | 669[0n]bp |
| Urbanus | belliDHJ01 | [5771] | 03-SRNP-12633.1 | 669[0n]bp |
| Urbanus | belliDHJ01 | [5772] | 03-SRNP-12657.1 | 669[0n]bp |
| Urbanus | belliDHJ01 | [5773] | 03-SRNP-12627.1 | 669[0n]bp |
| Urbanus | belliDHJ01 | [5774] | 03-SRNP-12947.1 | 669[0n]bp |
| Urbanus | belliDHJ01 | [5775] | 03-SRNP-11566   | 669[0n]bp |
| Urbanus | belliDHJ01 | [5776] | 03-SRNP-12345.1 | 669[0n]bp |
| Urbanus | belliDHJ01 | [5777] | 03-SRNP-10529   | 669[0n]bp |
| Urbanus | belliDHJ01 | [5778] | 03-SRNP-12298.1 | 669[0n]bp |
| Urbanus | belliDHJ01 | [5779] | 03-SRNP-11211   | 669[0n]bp |
| Urbanus | belliDHJ01 | [5780] | 04-SRNP-21912   | 669[0n]bp |
| Urbanus | belliDHJ01 | [5781] | 01-SRNP-23117   | 669[0n]bp |
| Urbanus | belliDHJ01 | [5782] | 02-SRNP-7107    | 669[0n]bp |
| Urbanus | belliDHJ01 | [5783] | 01-SRNP-1028    | 669[0n]bp |
| Urbanus | belliDHJ01 | [5784] | 01-SRNP-22505   | 669[0n]bp |
| Urbanus | belliDHJ01 | [5785] | 00-SRNP-22025   | 669[0n]bp |
| Urbanus | belliDHJ01 | [5786] | 99-SRNP-2440    | 669[0n]bp |
| Urbanus | belliDHJ01 | [5787] | 02-SRNP-590     | 669[0n]bp |
| Urbanus | belliDHJ01 | [5788] | 02-SRNP-7734    | 669[0n]bp |
| Urbanus | belliDHJ01 | [5789] | 01-SRNP-5700    | 669[0n]bp |
| Urbanus | belliDHJ01 | [5790] | 00-SRNP-1534    | 669[0n]bp |
| Urbanus | belliDHJ01 | [5791] | 00-SRNP-2200    | 669[0n]bp |
| Urbanus | belliDHJ01 | [5792] | 00-SRNP-22026   | 669[0n]bp |
| Urbanus | belliDHJ01 | [5793] | 02-SRNP-12992   | 669[0n]bp |
| Urbanus | belliDHJ01 | [5794] | 04-SRNP-49712   | 669[0n]bp |
| Urbanus | belliDHJ01 | [5795] | 04-SRNP-49960   | 669[0n]bp |
| Urbanus | belliDHJ01 | [5796] | 04-SRNP-49714   | 669[0n]bp |

|                    |        |                 |           |
|--------------------|--------|-----------------|-----------|
| Urbanus bellidHJ01 | [5794] | 04-SRNP-49712   | 669[0n]bp |
| Urbanus bellidHJ01 | [5795] | 04-SRNP-49960   | 669[0n]bp |
| Urbanus bellidHJ01 | [5796] | 04-SRNP-49714   | 669[0n]bp |
| Urbanus bellidHJ01 | [5797] | 04-SRNP-49963   | 669[0n]bp |
| Urbanus bellidHJ01 | [5798] | 04-SRNP-41942   | 669[0n]bp |
| Urbanus bellidHJ01 | [5799] | 04-SRNP-15157   | 669[0n]bp |
| Urbanus bellidHJ01 | [5800] | 04-SRNP-15160   | 669[0n]bp |
| Urbanus bellidHJ01 | [5801] | 04-SRNP-15153   | 669[0n]bp |
| Urbanus bellidHJ01 | [5802] | 04-SRNP-15679   | 669[0n]bp |
| Urbanus bellidHJ01 | [5803] | 04-SRNP-15149   | 669[0n]bp |
| Urbanus bellidHJ01 | [5804] | 04-SRNP-15189   | 669[0n]bp |
| Urbanus bellidHJ01 | [5805] | 04-SRNP-15161   | 669[0n]bp |
| Urbanus bellidHJ01 | [5806] | 04-SRNP-15155   | 669[0n]bp |
| Urbanus bellidHJ01 | [5807] | 04-SRNP-15147   | 669[0n]bp |
| Urbanus bellidHJ01 | [5808] | 04-SRNP-15146   | 669[0n]bp |
| Urbanus bellidHJ01 | [5809] | 04-SRNP-15154   | 669[0n]bp |
| Urbanus bellidHJ01 | [5810] | 04-SRNP-15137   | 669[0n]bp |
| Urbanus bellidHJ01 | [5811] | 04-SRNP-15162   | 669[0n]bp |
| Urbanus bellidHJ01 | [5812] | 04-SRNP-15150   | 669[0n]bp |
| Urbanus bellidHJ01 | [5813] | 04-SRNP-15674   | 669[0n]bp |
| Urbanus bellidHJ01 | [5814] | 04-SRNP-15680   | 669[0n]bp |
| Urbanus bellidHJ01 | [5815] | 04-SRNP-15677   | 669[0n]bp |
| Urbanus bellidHJ01 | [5816] | 04-SRNP-48641   | 669[0n]bp |
| Urbanus bellidHJ01 | [5817] | 04-SRNP-48028   | 669[0n]bp |
| Urbanus bellidHJ01 | [5818] | 04-SRNP-48033   | 669[0n]bp |
| Urbanus bellidHJ01 | [5819] | 04-SRNP-47563   | 669[0n]bp |
| Urbanus bellidHJ01 | [5820] | 04-SRNP-14307   | 669[0n]bp |
| Urbanus bellidHJ01 | [5821] | 04-SRNP-14390   | 669[0n]bp |
| Urbanus bellidHJ01 | [5822] | 04-SRNP-14389   | 669[0n]bp |
| Urbanus bellidHJ01 | [5823] | 04-SRNP-41681   | 669[0n]bp |
| Urbanus bellidHJ01 | [5824] | 04-SRNP-41680   | 669[0n]bp |
| Urbanus bellidHJ01 | [5825] | 04-SRNP-48639   | 669[0n]bp |
| Urbanus bellidHJ01 | [5826] | 04-SRNP-47956   | 669[0n]bp |
| Urbanus bellidHJ01 | [5827] | 04-SRNP-47824   | 669[0n]bp |
| Urbanus bellidHJ01 | [5828] | 04-SRNP-14108   | 669[0n]bp |
| Urbanus bellidHJ01 | [5829] | 01-SRNP-5310    | 669[0n]bp |
| Urbanus bellidHJ01 | [5830] | 01-SRNP-5311    | 669[0n]bp |
| Urbanus bellidHJ01 | [5831] | 01-SRNP-3745    | 669[0n]bp |
| Urbanus bellidHJ01 | [5832] | 01-SRNP-3404    | 669[0n]bp |
| Urbanus bellidHJ01 | [5833] | 01-SRNP-23060   | 669[0n]bp |
| Urbanus bellidHJ01 | [5834] | 02-SRNP-13670   | 669[0n]bp |
| Urbanus bellidHJ01 | [5835] | 02-SRNP-2246    | 669[0n]bp |
| Urbanus bellidHJ01 | [5836] | 02-SRNP-28991   | 669[0n]bp |
| Urbanus bellidHJ01 | [5837] | 02-SRNP-32169   | 669[0n]bp |
| Urbanus bellidHJ01 | [5838] | 02-SRNP-11533   | 669[0n]bp |
| Urbanus bellidHJ01 | [5839] | 02-SRNP-13111   | 669[0n]bp |
| Urbanus bellidHJ01 | [5840] | 02-SRNP-1028    | 669[0n]bp |
| Urbanus bellidHJ01 | [5841] | 02-SRNP-13671   | 669[0n]bp |
| Urbanus bellidHJ01 | [5842] | 02-SRNP-163     | 669[0n]bp |
| Urbanus bellidHJ01 | [5843] | 04-SRNP-33067   | 669[0n]bp |
| Urbanus bellidHJ01 | [5844] | 04-SRNP-21152   | 669[0n]bp |
| Urbanus bellidHJ01 | [5845] | 04-SRNP-31053   | 669[0n]bp |
| Urbanus bellidHJ01 | [5846] | 04-SRNP-22913   | 669[0n]bp |
| Urbanus bellidHJ01 | [5847] | 04-SRNP-45034   | 669[0n]bp |
| Urbanus bellidHJ01 | [5848] | 04-SRNP-20680   | 669[0n]bp |
| Urbanus bellidHJ01 | [5849] | 04-SRNP-20872   | 669[0n]bp |
| Urbanus bellidHJ01 | [5850] | 04-SRNP-20925   | 669[0n]bp |
| Urbanus bellidHJ01 | [5851] | 06-SRNP-59672   | 669[0n]bp |
| Urbanus bellidHJ01 | [5852] | 04-SRNP-47963   | 669[0n]bp |
| Urbanus bellidHJ01 | [5853] | 04-SRNP-47882   | 669[0n]bp |
| Urbanus bellidHJ01 | [5854] | 04-SRNP-47558   | 669[0n]bp |
| Urbanus bellidHJ01 | [5855] | 04-SRNP-14305   | 669[2n]bp |
| Urbanus bellidHJ01 | [5856] | 06-SRNP-40146   | 630[0n]bp |
| Urbanus bellidHJ01 | [5857] | 07-SRNP-20167   | 645[0n]bp |
| Urbanus bellidHJ01 | [5858] | 01-SRNP-3403    | 669[0n]bp |
| Urbanus bellidHJ01 | [5859] | 02-SRNP-21477   | 669[0n]bp |
| Urbanus bellidHJ01 | [5860] | 03-SRNP-12581.1 | 669[0n]bp |
| Urbanus bellidHJ01 | [5861] | 03-SRNP-12948.1 | 669[0n]bp |
| Urbanus bellidHJ01 | [5862] | 07-SRNP-41928   | 669[0n]bp |
| Urbanus bellidHJ01 | [5863] | 08-SRNP-4727    | 669[0n]bp |
| Urbanus bellidHJ01 | [5864] | 08-SRNP-65935   | 669[0n]bp |
| Urbanus bellidHJ01 | [5865] | 08-SRNP-5848    | 669[0n]bp |
| Urbanus bellidHJ01 | [5866] | 08-SRNP-23800   | 669[0n]bp |
| Urbanus bellidHJ01 | [5867] | 08-SRNP-24278   | 669[0n]bp |
| Urbanus bellidHJ01 | [5868] | 09-SRNP-69873   | 669[0n]bp |
| Astraptes tucuti   | [5869] | 98-SRNP-15995   | 657[0n]bp |
| Astraptes tucuti   | [5870] | 01-SRNP-21502   | 642[0n]bp |
| Astraptes tucuti   | [5871] | 01-SRNP-21504   | 630[0n]bp |
| Astraptes tucuti   | [5872] | 04-SRNP-3376    | 669[0n]bp |
| Astraptes tucuti   | [5873] | 05-SRNP-4479    | 645[2n]bp |
| Astraptes tucuti   | [5874] | 05-SRNP-5094    | 651[1n]bp |
| Astraptes tucuti   | [5875] | 07-SRNP-42005   | 645[0n]bp |
| Astraptes tucuti   | [5876] | 04-SRNP-35322   | 666[0n]bp |
| Astraptes tucuti   | [5877] | 04-SRNP-35430   | 666[0n]bp |
| Astraptes tucuti   | [5878] | 04-SRNP-35323   | 666[0n]bp |
| Astraptes tucuti   | [5879] | 02-SRNP-3446    | 639[0n]bp |
| Astraptes tucuti   | [5880] | 07-SRNP-1173    | 669[0n]bp |
| Astraptes tucuti   | [5881] | 06-SRNP-41042   | 669[0n]bp |
| Astraptes tucuti   | [5882] | 06-SRNP-2459    | 669[0n]bp |
| Astraptes tucuti   | [5883] | 05-SRNP-4645    | 669[0n]bp |
| Astraptes tucuti   | [5884] | 04-SRNP-2718    | 669[0n]bp |
| Astraptes tucuti   | [5885] | 04-SRNP-60520   | 669[0n]bp |
| Astraptes tucuti   | [5886] | 04-SRNP-60491   | 669[0n]bp |
| Astraptes tucuti   | [5887] | 07-SRNP-2625    | 639[0n]bp |
| Astraptes tucuti   | [5888] | 07-SRNP-1968    | 609[0n]bp |
| Astraptes tucuti   | [5889] | 07-SRNP-35969   | 669[0n]bp |
| Astraptes tucuti   | [5890] | 07-SRNP-2349    | 669[0n]bp |
| Astraptes tucuti   | [5891] | 09-SRNP-56674   | 669[0n]bp |
| Urbanus pronta     | [5892] | 04-SRNP-46061   | 669[0n]bp |
| Urbanus pronta     | [5893] | 04-SRNP-46058   | 669[0n]bp |
| Urbanus pronta     | [5894] | 04-SRNP-46056   | 669[0n]bp |
| Urbanus pronta     | [5895] | 04-SRNP-46057   | 669[0n]bp |
| Urbanus pronta     | [5896] | 08-SRNP-36361   | 669[0n]bp |

Urbanus prouta | 5894 | 04-SRNP-46056 | 669 | 0n | bp  
 Urbanus prouta | 5895 | 04-SRNP-46057 | 669 | 0n | bp  
 Urbanus prouta | 5896 | 08-SRNP-36361 | 669 | 0n | bp  
 Urbanus prouta | 5897 | 06-SRNP-9393 | 669 | 0n | bp  
 Urbanus prouta | 5898 | 06-SRNP-45648 | 669 | 0n | bp  
 Urbanus prouta | 5899 | 06-SRNP-45649 | 669 | 0n | bp  
 Urbanus prouta | 5900 | 06-SRNP-3187 | 669 | 0n | bp  
 Urbanus prouta | 5901 | 01-SRNP-3205 | 669 | 0n | bp  
 Urbanus prouta | 5902 | 01-SRNP-22501 | 669 | 0n | bp  
 Urbanus prouta | 5903 | 02-SRNP-17474 | 669 | 0n | bp  
 Urbanus prouta | 5904 | 02-SRNP-18620 | 669 | 0n | bp  
 Urbanus prouta | 5905 | 02-SRNP-27305 | 669 | 0n | bp  
 Urbanus prouta | 5906 | 02-SRNP-27308 | 669 | 0n | bp  
 Urbanus prouta | 5907 | 02-SRNP-1605 | 669 | 0n | bp  
 Urbanus prouta | 5908 | 02-SRNP-17477 | 669 | 3n | bp  
 Urbanus prouta | 5909 | 02-SRNP-17476 | 606 | 0n | bp  
 Urbanus prouta | 5910 | 06-SRNP-5958 | 507 | 0n | bp  
 Urbanus prouta | 5911 | 06-SRNP-23251 | 654 | 1n | bp  
 Urbanus prouta | 5912 | 09-SRNP-58058 | 669 | 0n | bp  
 Urbanus prouta | 5913 | 09-SRNP-58053 | 669 | 0n | bp  
 Astraptes apastus | 5914 | 03-SRNP-20746 | 663 | 0n | bp  
 Astraptes apastus | 5915 | 07-SRNP-40564 | 669 | 0n | bp  
 Astraptes brevicauda | 5916 | 03-SRNP-11830 | 669 | 0n | bp  
 Astraptes brevicauda | 5917 | 08-SRNP-1126 | 669 | 0n | bp  
 Astraptes brevicauda | 5918 | 05-SRNP-40306 | 669 | 0n | bp  
 Astraptes brevicauda | 5919 | 01-SRNP-3278 | 630 | 0n | bp  
 Astraptes brevicauda | 5920 | 01-SRNP-5574 | 618 | 2n | bp  
 Astraptes brevicauda | 5921 | 05-SRNP-41750 | 669 | 2n | bp  
 Astraptes brevicauda | 5922 | 04-SRNP-23822 | 669 | 0n | bp  
 Astraptes brevicauda | 5923 | 04-SRNP-41627 | 669 | 0n | bp  
 Astraptes brevicauda | 5924 | 04-SRNP-42195 | 669 | 0n | bp  
 Astraptes brevicauda | 5925 | 04-SRNP-4716 | 669 | 0n | bp  
 Astraptes brevicauda | 5926 | 03-SRNP-11273 | 669 | 0n | bp  
 Astraptes brevicauda | 5927 | 03-SRNP-6444 | 669 | 0n | bp  
 Astraptes brevicauda | 5928 | 03-SRNP-6247 | 669 | 0n | bp  
 Astraptes brevicauda | 5929 | 05-SRNP-390 | 669 | 0n | bp  
 Astraptes brevicauda | 5930 | 05-SRNP-41809 | 669 | 0n | bp  
 Astraptes brevicauda | 5931 | 06-SRNP-31309 | 669 | 0n | bp  
 Astraptes brevicauda | 5932 | 06-SRNP-3274 | 669 | 0n | bp  
 Astraptes brevicauda | 5933 | 07-SRNP-1174 | 669 | 0n | bp  
 Astraptes brevicauda | 5934 | 05-SRNP-7334 | 669 | 0n | bp  
 Astraptes brevicauda | 5935 | 07-SRNP-66036 | 669 | 0n | bp  
 Astraptes brevicauda | 5936 | 08-SRNP-1013 | 669 | 0n | bp  
 Astraptes brevicauda | 5937 | 08-SRNP-5071 | 669 | 0n | bp  
 Astraptes anaphus annettaDHJ01 | 5938 | 04-SRNP-686 | 669 | 0n | bp  
 Astraptes anaphus annettaDHJ01 | 5939 | 04-SRNP-1067 | 669 | 0n | bp  
 Astraptes anaphus annettaDHJ01 | 5940 | 01-SRNP-16954 | 669 | 0n | bp  
 Astraptes anaphus annettaDHJ01 | 5941 | 02-SRNP-28707 | 669 | 0n | bp  
 Astraptes anaphus annettaDHJ01 | 5942 | 07-SRNP-33566 | 669 | 0n | bp  
 Astraptes anaphus annettaDHJ03 | 5943 | 97-SRNP-417 | 618 | 0n | bp  
 Astraptes anaphus annettaDHJ03 | 5944 | 97-SRNP-451 | 609 | 0n | bp  
 Astraptes anaphus annettaDHJ03 | 5945 | 02-SRNP-28432 | 660 | 0n | bp  
 Astraptes anaphus annettaDHJ03 | 5946 | 00-SRNP-20224 | 657 | 0n | bp  
 Astraptes anaphus annettaDHJ03 | 5947 | 97-SRNP-492 | 624 | 0n | bp  
 Astraptes anaphus annettaDHJ03 | 5948 | 93-SRNP-4847 | 609 | 0n | bp  
 Astraptes anaphus annettaDHJ03 | 5949 | 03-SRNP-26790 | 669 | 0n | bp  
 Astraptes anaphus annettaDHJ03 | 5950 | 97-SRNP-457 | 609 | 0n | bp  
 Astraptes anaphus annettaDHJ03 | 5951 | 93-SRNP-7914 | 615 | 0n | bp  
 Astraptes anaphus annettaDHJ03 | 5952 | 97-SRNP-462 | 669 | 0n | bp  
 Astraptes anaphus annettaDHJ03 | 5953 | 02-SRNP-5751 | 669 | 0n | bp  
 Astraptes anaphus annettaDHJ03 | 5954 | 02-SRNP-5101 | 669 | 0n | bp  
 Astraptes anaphus annettaDHJ03 | 5955 | 02-SRNP-5100 | 669 | 0n | bp  
 Astraptes anaphus annettaDHJ03 | 5956 | 02-SRNP-29489 | 633 | 0n | bp  
 Astraptes anaphus annettaDHJ03 | 5957 | 94-SRNP-7681 | 618 | 0n | bp  
 Astraptes anaphus annettaDHJ03 | 5958 | 06-SRNP-46316 | 669 | 0n | bp  
 Astraptes anaphus annettaDHJ03 | 5959 | 07-SRNP-20031 | 669 | 0n | bp  
 Astraptes anaphus annettaDHJ03 | 5960 | 07-SRNP-20299 | 669 | 0n | bp  
 Astraptes anaphus annettaDHJ03 | 5961 | 07-SRNP-20217 | 669 | 0n | bp  
 Astraptes anaphus annettaDHJ03 | 5962 | 07-SRNP-23872 | 669 | 0n | bp  
 Astraptes anaphus annettaDHJ03 | 5963 | 94-SRNP-7840 | 645 | 0n | bp  
 Astraptes anaphus annettaDHJ03 | 5964 | 00-SRNP-20296 | 669 | 0n | bp  
 Astraptes anaphus annettaDHJ03 | 5965 | 06-SRNP-3246 | 633 | 0n | bp  
 Astraptes anaphus annettaDHJ03 | 5966 | 00-SRNP-20174 | 642 | 0n | bp  
 Astraptes anaphus annettaDHJ03 | 5967 | 94-SRNP-7838 | 669 | 0n | bp  
 Astraptes anaphus annettaDHJ03 | 5968 | 93-SRNP-6735 | 609 | 0n | bp  
 Astraptes anaphus annettaDHJ03 | 5969 | 92-SRNP-4964 | 609 | 0n | bp  
 Astraptes anaphus annettaDHJ03 | 5970 | 97-SRNP-10083 | 609 | 0n | bp  
 Astraptes anaphus annettaDHJ03 | 5971 | 92-SRNP-4961 | 609 | 0n | bp  
 Astraptes anaphus annettaDHJ03 | 5972 | 07-SRNP-20148 | 669 | 0n | bp  
 Astraptes anaphus annettaDHJ03 | 5973 | 02-SRNP-28615 | 660 | 0n | bp  
 Astraptes anaphus annettaDHJ03 | 5974 | 05-SRNP-2000 | 687 | 0n | bp  
 Astraptes anaphus annettaDHJ03 | 5975 | 00-SRNP-19298 | 669 | 0n | bp  
 Astraptes anaphus annettaDHJ03 | 5976 | 00-SRNP-20267 | 669 | 0n | bp  
 Astraptes anaphus annettaDHJ03 | 5977 | 97-SRNP-11538 | 669 | 0n | bp  
 Astraptes anaphus annettaDHJ03 | 5978 | 07-SRNP-20264 | 669 | 0n | bp  
 Astraptes anaphus annettaDHJ03 | 5979 | 93-SRNP-8375 | 669 | 0n | bp  
 Astraptes anaphus annettaDHJ03 | 5980 | 00-SRNP-17721 | 669 | 0n | bp  
 Astraptes anaphus annettaDHJ03 | 5981 | 02-SRNP-28828 | 669 | 0n | bp  
 Astraptes anaphus annettaDHJ03 | 5982 | 00-SRNP-6012 | 669 | 0n | bp  
 Astraptes anaphus annettaDHJ03 | 5983 | 01-SRNP-17042 | 669 | 0n | bp  
 Astraptes anaphus annettaDHJ03 | 5984 | 97-SRNP-9242 | 669 | 0n | bp  
 Astraptes anaphus annettaDHJ03 | 5985 | 00-SRNP-20270 | 669 | 0n | bp  
 Astraptes anaphus annettaDHJ03 | 5986 | 02-SRNP-30063 | 669 | 0n | bp  
 Astraptes anaphus annettaDHJ03 | 5987 | 02-SRNP-28709 | 669 | 0n | bp  
 Astraptes anaphus annettaDHJ03 | 5988 | 02-SRNP-28395 | 669 | 0n | bp  
 Astraptes anaphus annettaDHJ03 | 5989 | 97-SRNP-2276 | 669 | 0n | bp  
 Astraptes anaphus annettaDHJ03 | 5990 | 03-SRNP-34428 | 669 | 0n | bp  
 Astraptes anaphus annettaDHJ03 | 5991 | 03-SRNP-7277 | 669 | 0n | bp  
 Astraptes anaphus annettaDHJ03 | 5992 | 06-SRNP-41210 | 669 | 0n | bp  
 Astraptes anaphus annettaDHJ03 | 5993 | 06-SRNP-41208 | 669 | 0n | bp  
 Astraptes anaphus annettaDHJ03 | 5994 | 04-SRNP-13408 | 669 | 0n | bp  
 Astraptes anaphus annettaDHJ03 | 5995 | 93-SRNP-4846 | 615 | 0n | bp  
 Astraptes anaphus annettaDHJ03 | 5996 | 93-SRNP-7913 | 612 | 0n | bp

|           |               |              |               |               |        |        |
|-----------|---------------|--------------|---------------|---------------|--------|--------|
| Astraptes | anaphus       | annettaDHJ03 | [5994]        | 04-SRNP-13408 | 669    | [0n]bp |
| Astraptes | anaphus       | annettaDHJ03 | [5995]        | 93-SRNP-4846  | 615    | [0n]bp |
| Astraptes | anaphus       | annettaDHJ03 | [5996]        | 93-SRNP-7913  | 612    | [0n]bp |
| Astraptes | anaphus       | annettaDHJ03 | [5997]        | 07-SRNP-20180 | 669    | [0n]bp |
| Astraptes | anaphus       | annettaDHJ03 | [5998]        | 07-SRNP-42788 | 654    | [0n]bp |
| Astraptes | anaphus       | annettaDHJ02 | [5999]        | 92-SRNP-4965  | 645    | [1n]bp |
| Astraptes | anaphus       | annettaDHJ02 | [6000]        | 97-SRNP-421   | 657    | [0n]bp |
| Astraptes | anaphus       | annettaDHJ02 | [6001]        | 00-SRNP-19297 | 657    | [0n]bp |
| Astraptes | anaphus       | annettaDHJ02 | [6002]        | 97-SRNP-480   | 660    | [0n]bp |
| Astraptes | anaphus       | annettaDHJ02 | [6003]        | 92-SRNP-4960  | 621    | [0n]bp |
| Astraptes | anaphus       | annettaDHJ02 | [6004]        | 06-SRNP-30279 | 603    | [0n]bp |
| Astraptes | anaphus       | annettaDHJ02 | [6005]        | 97-SRNP-3128  | 669    | [0n]bp |
| Astraptes | anaphus       | annettaDHJ02 | [6006]        | 97-SRNP-3009  | 615    | [0n]bp |
| Astraptes | anaphus       | annettaDHJ02 | [6007]        | 93-SRNP-8376  | 666    | [0n]bp |
| Astraptes | anaphus       | annettaDHJ02 | [6008]        | 06-SRNP-41207 | 666    | [0n]bp |
| Astraptes | anaphus       | annettaDHJ02 | [6009]        | 02-SRNP-28509 | 669    | [0n]bp |
| Astraptes | anaphus       | annettaDHJ02 | [6010]        | 93-SRNP-6180  | 669    | [0n]bp |
| Astraptes | anaphus       | annettaDHJ02 | [6011]        | 97-SRNP-2560  | 669    | [0n]bp |
| Astraptes | anaphus       | annettaDHJ02 | [6012]        | 96-SRNP-4565  | 669    | [0n]bp |
| Astraptes | anaphus       | annettaDHJ02 | [6013]        | 93-SRNP-6733  | 669    | [0n]bp |
| Astraptes | anaphus       | annettaDHJ02 | [6014]        | 02-SRNP-32066 | 669    | [0n]bp |
| Astraptes | anaphus       | annettaDHJ02 | [6015]        | 97-SRNP-2566  | 669    | [0n]bp |
| Astraptes | anaphus       | annettaDHJ02 | [6016]        | 02-SRNP-28069 | 669    | [0n]bp |
| Astraptes | anaphus       | annettaDHJ02 | [6017]        | 02-SRNP-2245  | 669    | [0n]bp |
| Astraptes | anaphus       | annettaDHJ02 | [6018]        | 06-SRNP-41209 | 669    | [0n]bp |
| Astraptes | anaphus       | annettaDHJ02 | [6019]        | 06-SRNP-41039 | 669    | [0n]bp |
| Astraptes | anaphus       | annettaDHJ02 | [6020]        | 04-SRNP-61482 | 669    | [0n]bp |
| Astraptes | anaphus       | annettaDHJ02 | [6021]        | 94-SRNP-6194  | 609    | [0n]bp |
| Astraptes | anaphus       | annettaDHJ02 | [6022]        | 96-SRNP-4564  | 609    | [0n]bp |
| Astraptes | anaphus       | annettaDHJ02 | [6023]        | 93-SRNP-6178  | 609    | [0n]bp |
| Astraptes | anaphus       | annettaDHJ02 | [6024]        | 94-SRNP-7265  | 609    | [0n]bp |
| Astraptes | anaphus       | annettaDHJ02 | [6025]        | 93-SRNP-4708  | 609    | [0n]bp |
| Astraptes | anaphus       | annettaDHJ02 | [6026]        | 93-SRNP-8379  | 609    | [0n]bp |
| Astraptes | anaphus       | annettaDHJ02 | [6027]        | 93-SRNP-6179  | 609    | [0n]bp |
| Astraptes | anaphus       | annettaDHJ02 | [6028]        | 92-SRNP-4963  | 609    | [0n]bp |
| Astraptes | anaphus       | annettaDHJ02 | [6029]        | 02-SRNP-5753  | 669    | [0n]bp |
| Astraptes | anaphus       | annettaDHJ02 | [6030]        | 93-SRNP-7917  | 597    | [0n]bp |
| Astraptes | anaphus       | annettaDHJ02 | [6031]        | 93-SRNP-5032  | 615    | [0n]bp |
| Astraptes | anaphus       | annettaDHJ02 | [6032]        | 94-SRNP-6195  | 621    | [0n]bp |
| Astraptes | anaphus       | annettaDHJ02 | [6033]        | 97-SRNP-2556  | 612    | [0n]bp |
| Astraptes | anaphus       | annettaDHJ02 | [6034]        | 93-SRNP-8378  | 612    | [0n]bp |
| Astraptes | anaphus       | annettaDHJ02 | [6035]        | 97-SRNP-2559  | 618    | [0n]bp |
| Astraptes | anaphus       | annettaDHJ02 | [6036]        | 97-SRNP-418   | 618    | [0n]bp |
| Astraptes | anaphus       | annettaDHJ02 | [6037]        | 06-SRNP-21977 | 669    | [0n]bp |
| Astraptes | anaphus       | annettaDHJ02 | [6038]        | 07-SRNP-20150 | 669    | [0n]bp |
| Astraptes | anaphus       | annettaDHJ02 | [6039]        | 07-SRNP-20439 | 669    | [0n]bp |
| Astraptes | anaphus       | annettaDHJ02 | [6040]        | 07-SRNP-20089 | 669    | [0n]bp |
| Astraptes | anaphus       | annettaDHJ02 | [6041]        | 02-SRNP-28508 | 669    | [0n]bp |
| Astraptes | anaphus       | annettaDHJ02 | [6042]        | 97-SRNP-477   | 669    | [0n]bp |
| Astraptes | anaphus       | annettaDHJ02 | [6043]        | 97-SRNP-420   | 669    | [0n]bp |
| Astraptes | anaphus       | annettaDHJ02 | [6044]        | 00-SRNP-20266 | 669    | [0n]bp |
| Astraptes | anaphus       | annettaDHJ02 | [6045]        | 09-SRNP-44302 | 669    | [0n]bp |
| Astraptes | anaphus       | annettaDHJ02 | [6046]        | 09-SRNP-20617 | 669    | [0n]bp |
| Astraptes | hopfferiDHJ02 | [6047]       | 00-SRNP-6038  | 591           | [0n]bp |        |
| Astraptes | hopfferiDHJ02 | [6048]       | 05-SRNP-6035  | 633           | [0n]bp |        |
| Astraptes | hopfferiDHJ02 | [6049]       | 05-SRNP-6064  | 633           | [0n]bp |        |
| Astraptes | hopfferiDHJ02 | [6050]       | 05-SRNP-24819 | 630           | [0n]bp |        |
| Astraptes | hopfferiDHJ02 | [6051]       | 05-SRNP-24755 | 630           | [0n]bp |        |
| Astraptes | hopfferiDHJ02 | [6052]       | 05-SRNP-24197 | 630           | [0n]bp |        |
| Astraptes | hopfferiDHJ02 | [6053]       | 05-SRNP-19978 | 633           | [0n]bp |        |
| Astraptes | hopfferiDHJ02 | [6054]       | 05-SRNP-66135 | 630           | [0n]bp |        |
| Astraptes | hopfferiDHJ02 | [6055]       | 05-SRNP-24396 | 630           | [0n]bp |        |
| Astraptes | hopfferiDHJ02 | [6056]       | 05-SRNP-60568 | 630           | [0n]bp |        |
| Astraptes | hopfferiDHJ02 | [6057]       | 05-SRNP-61464 | 633           | [0n]bp |        |
| Astraptes | hopfferiDHJ02 | [6058]       | 05-SRNP-24340 | 567           | [0n]bp |        |
| Astraptes | hopfferiDHJ02 | [6059]       | 07-SRNP-57872 | 669           | [0n]bp |        |
| Astraptes | hopfferiDHJ02 | [6060]       | 00-SRNP-6035  | 624           | [0n]bp |        |
| Astraptes | hopfferiDHJ02 | [6061]       | 06-SRNP-58062 | 657           | [0n]bp |        |
| Astraptes | hopfferiDHJ02 | [6062]       | 07-SRNP-21123 | 669           | [0n]bp |        |
| Astraptes | hopfferiDHJ02 | [6063]       | 07-SRNP-20481 | 669           | [0n]bp |        |
| Astraptes | hopfferiDHJ02 | [6064]       | 07-SRNP-20482 | 669           | [0n]bp |        |
| Astraptes | hopfferiDHJ02 | [6065]       | 02-SRNP-5424  | 669           | [0n]bp |        |
| Astraptes | hopfferiDHJ02 | [6066]       | 99-SRNP-2552  | 669           | [0n]bp |        |
| Astraptes | hopfferiDHJ02 | [6067]       | 98-SRNP-4521  | 669           | [0n]bp |        |
| Astraptes | hopfferiDHJ02 | [6068]       | 01-SRNP-16888 | 669           | [0n]bp |        |
| Astraptes | hopfferiDHJ02 | [6069]       | 01-SRNP-16907 | 669           | [0n]bp |        |
| Astraptes | hopfferiDHJ02 | [6070]       | 95-SRNP-10163 | 669           | [0n]bp |        |
| Astraptes | hopfferiDHJ02 | [6071]       | 05-SRNP-19981 | 669           | [0n]bp |        |
| Astraptes | hopfferiDHJ02 | [6072]       | 05-SRNP-19980 | 669           | [0n]bp |        |
| Astraptes | hopfferiDHJ02 | [6073]       | 04-SRNP-15947 | 669           | [0n]bp |        |
| Astraptes | hopfferiDHJ02 | [6074]       | 05-SRNP-21448 | 633           | [0n]bp |        |
| Astraptes | hopfferiDHJ02 | [6075]       | 96-SRNP-9303  | 462           | [1n]bp |        |
| Astraptes | hopfferiDHJ02 | [6076]       | 05-SRNP-24589 | 633           | [0n]bp |        |
| Astraptes | hopfferiDHJ02 | [6077]       | 05-SRNP-24568 | 633           | [0n]bp |        |
| Astraptes | hopfferiDHJ02 | [6078]       | 98-SRNP-4411  | 618           | [0n]bp |        |
| Astraptes | hopfferiDHJ02 | [6079]       | 07-SRNP-55079 | 609           | [0n]bp |        |
| Astraptes | hopfferiDHJ02 | [6080]       | 07-SRNP-20899 | 627           | [0n]bp |        |
| Astraptes | hopfferiDHJ02 | [6081]       | 07-SRNP-24342 | 669           | [1n]bp |        |
| Astraptes | hopfferiDHJ02 | [6082]       | 07-SRNP-15266 | 669           | [0n]bp |        |
| Astraptes | hopfferiDHJ02 | [6083]       | 07-SRNP-15267 | 669           | [0n]bp |        |
| Astraptes | hopfferiDHJ02 | [6084]       | 07-SRNP-15268 | 669           | [0n]bp |        |
| Astraptes | hopfferiDHJ02 | [6085]       | 08-SRNP-16500 | 669           | [0n]bp |        |
| Astraptes | hopfferiDHJ02 | [6086]       | 08-SRNP-16501 | 669           | [0n]bp |        |
| Astraptes | hopfferiDHJ02 | [6087]       | 08-SRNP-16509 | 669           | [0n]bp |        |
| Astraptes | hopfferiDHJ02 | [6088]       | 08-SRNP-65151 | 669           | [0n]bp |        |
| Astraptes | hopfferiDHJ02 | [6089]       | 07-SRNP-24343 | 669           | [0n]bp |        |
| Astraptes | hopfferiDHJ02 | [6090]       | 08-SRNP-16506 | 669           | [0n]bp |        |
| Astraptes | hopfferiDHJ02 | [6091]       | 08-SRNP-14782 | 669           | [0n]bp |        |
| Astraptes | hopfferiDHJ02 | [6092]       | 08-SRNP-16510 | 669           | [0n]bp |        |
| Astraptes | hopfferiDHJ02 | [6093]       | 08-SRNP-16504 | 669           | [0n]bp |        |
| Astraptes | hopfferiDHJ02 | [6094]       | 00-SRNP-18470 | 669           | [0n]bp |        |
| Astraptes | hopfferiDHJ02 | [6095]       | 03-SRNP-15756 | 669           | [0n]bp |        |
| Astraptes | hopfferiDHJ02 | [6096]       | 02-SRNP-13859 | 669           | [0n]bp |        |

|           |               |            |               |               |        |        |
|-----------|---------------|------------|---------------|---------------|--------|--------|
| Astraptes | hopfferiDHJ02 | [6094]     | 00-SRNP-18470 | 669           | [On]bp |        |
| Astraptes | hopfferiDHJ02 | [6095]     | 03-SRNP-15756 | 669           | [On]bp |        |
| Astraptes | hopfferiDHJ02 | [6096]     | 02-SRNP-13859 | 669           | [On]bp |        |
| Astraptes | hopfferiDHJ02 | [6097]     | 01-SRNP-16887 | 669           | [On]bp |        |
| Astraptes | hopfferiDHJ02 | [6098]     | 02-SRNP-13861 | 669           | [On]bp |        |
| Astraptes | hopfferiDHJ02 | [6099]     | 02-SRNP-33228 | 669           | [On]bp |        |
| Astraptes | hopfferiDHJ02 | [6100]     | 02-SRNP-33292 | 669           | [On]bp |        |
| Astraptes | hopfferiDHJ02 | [6101]     | 01-SRNP-16885 | 669           | [On]bp |        |
| Astraptes | hopfferiDHJ02 | [6102]     | 07-SRNP-55080 | 669           | [On]bp |        |
| Astraptes | hopfferiDHJ02 | [6103]     | 07-SRNP-57649 | 669           | [On]bp |        |
| Astraptes | hopfferiDHJ02 | [6104]     | 07-SRNP-57556 | 669           | [On]bp |        |
| Astraptes | hopfferiDHJ02 | [6105]     | 08-SRNP-13809 | 669           | [On]bp |        |
| Astraptes | hopfferiDHJ02 | [6106]     | 08-SRNP-13808 | 669           | [On]bp |        |
| Astraptes | hopfferiDHJ02 | [6107]     | 08-SRNP-16352 | 669           | [On]bp |        |
| Astraptes | hopfferiDHJ02 | [6108]     | 08-SRNP-16353 | 669           | [On]bp |        |
| Astraptes | hopfferiDHJ01 | [6109]     | 05-SRNP-60355 | 633           | [On]bp |        |
| Astraptes | hopfferiDHJ01 | [6110]     | 05-SRNP-24692 | 630           | [On]bp |        |
| Astraptes | hopfferiDHJ01 | [6111]     | 05-SRNP-24395 | 630           | [On]bp |        |
| Astraptes | hopfferiDHJ01 | [6112]     | 05-SRNP-21444 | 669           | [On]bp |        |
| Astraptes | hopfferiDHJ01 | [6113]     | 98-SRNP-4412  | 669           | [On]bp |        |
| Astraptes | hopfferiDHJ01 | [6114]     | 98-SRNP-4402  | 645           | [On]bp |        |
| Astraptes | hopfferiDHJ01 | [6115]     | 98-SRNP-4409  | 669           | [On]bp |        |
| Astraptes | hopfferiDHJ01 | [6116]     | 98-SRNP-4399  | 669           | [On]bp |        |
| Astraptes | hopfferiDHJ01 | [6117]     | 98-SRNP-4408  | 669           | [On]bp |        |
| Astraptes | hopfferiDHJ01 | [6118]     | 08-SRNP-24553 | 669           | [On]bp |        |
| Astraptes | chiriouensis  | [6119]     | 05-SRNP-32306 | 669           | [On]bp |        |
| Astraptes | chiriouensis  | [6120]     | 04-SRNP-33647 | 669           | [On]bp |        |
| Astraptes | chiriouensis  | [6121]     | 04-SRNP-2338  | 669           | [On]bp |        |
| Astraptes | chiriouensis  | [6122]     | 06-SRNP-31610 | 633           | [1n]bp |        |
| Astraptes | chiriouensis  | [6123]     | 07-SRNP-41188 | 669           | [On]bp |        |
| Astraptes | chiriouensis  | [6124]     | 07-SRNP-40863 | 669           | [On]bp |        |
| Astraptes | chiriouensis  | [6125]     | 07-SRNP-23622 | 663           | [On]bp |        |
| Astraptes | alardus       | [6126]     | 05-SRNP-66269 | 669           | [3n]bp |        |
| Astraptes | alardus       | [6127]     | 05-SRNP-57547 | 651           | [On]bp |        |
| Astraptes | alardus       | [6128]     | 07-SRNP-56409 | 669           | [On]bp |        |
| Astraptes | alardus       | [6129]     | 07-SRNP-56408 | 669           | [On]bp |        |
| Astraptes | alardus       | [6130]     | 07-SRNP-35878 | 669           | [On]bp |        |
| Astraptes | alardus       | [6131]     | 07-SRNP-56961 | 669           | [On]bp |        |
| Astraptes | alardus       | [6132]     | 07-SRNP-56397 | 669           | [On]bp |        |
| Astraptes | alardus       | [6133]     | 06-SRNP-58880 | 669           | [On]bp |        |
| Astraptes | alardus       | [6134]     | 04-SRNP-60018 | 669           | [On]bp |        |
| Astraptes | alardus       | [6135]     | 04-SRNP-35460 | 669           | [On]bp |        |
| Astraptes | alardus       | [6136]     | 04-SRNP-45519 | 669           | [On]bp |        |
| Astraptes | alardus       | [6137]     | 04-SRNP-35461 | 669           | [On]bp |        |
| Astraptes | alardus       | [6138]     | 04-SRNP-24624 | 669           | [On]bp |        |
| Astraptes | alardus       | [6139]     | 07-SRNP-35859 | 645           | [On]bp |        |
| Astraptes | alardus       | [6140]     | 07-SRNP-56299 | 645           | [On]bp |        |
| Astraptes | alardus       | [6141]     | 05-SRNP-57546 | 669           | [4n]bp |        |
| Astraptes | alardus       | [6142]     | 05-SRNP-66293 | 669           | [5n]bp |        |
| Astraptes | alardus       | [6143]     | 04-SRNP-34471 | 627           | [On]bp |        |
| Astraptes | alardus       | [6144]     | 03-SRNP-3693  | 624           | [On]bp |        |
| Astraptes | alardus       | [6145]     | 07-SRNP-56473 | 648           | [On]bp |        |
| Astraptes | alardus       | [6146]     | 06-SRNP-35909 | 612           | [On]bp |        |
| Astraptes | alardus       | [6147]     | 06-SRNP-35908 | 609           | [On]bp |        |
| Astraptes | alardus       | [6148]     | 03-SRNP-3691  | 540           | [On]bp |        |
| Astraptes | alardus       | [6149]     | 05-SRNP-20286 | 573           | [On]bp |        |
| Astraptes | alardus       | [6150]     | 07-SRNP-35953 | 633           | [On]bp |        |
| Astraptes | alardus       | [6151]     | 07-SRNP-56765 | 669           | [On]bp |        |
| Astraptes | alardus       | [6152]     | 07-SRNP-65143 | 582           | [On]bp |        |
| Astraptes | alardus       | [6153]     | 07-SRNP-35914 | 621           | [On]bp |        |
| Astraptes | alardus       | [6154]     | 08-SRNP-45019 | 669           | [On]bp |        |
| Astraptes | alardus       | [6155]     | 08-SRNP-36614 | 669           | [On]bp |        |
| Astraptes | creteus       | cranaDHJ01 | [6156]        | 02-SRNP-23100 | 669    | [6n]bp |
| Astraptes | creteus       | cranaDHJ01 | [6157]        | 97-SRNP-1464  | 588    | [On]bp |
| Astraptes | creteus       | cranaDHJ01 | [6158]        | 02-SRNP-23417 | 585    | [On]bp |
| Astraptes | creteus       | cranaDHJ01 | [6159]        | 99-SRNP-13962 | 669    | [On]bp |
| Astraptes | creteus       | cranaDHJ01 | [6160]        | 02-SRNP-23933 | 669    | [On]bp |
| Astraptes | creteus       | cranaDHJ01 | [6161]        | 99-SRNP-13961 | 669    | [On]bp |
| Astraptes | creteus       | cranaDHJ01 | [6162]        | 03-SRNP-4189  | 669    | [On]bp |
| Astraptes | creteus       | cranaDHJ01 | [6163]        | 03-SRNP-4188  | 669    | [On]bp |
| Astraptes | creteus       | cranaDHJ01 | [6164]        | 03-SRNP-4333  | 669    | [On]bp |
| Astraptes | creteus       | cranaDHJ01 | [6165]        | 05-SRNP-35360 | 669    | [On]bp |
| Astraptes | creteus       | cranaDHJ01 | [6166]        | 97-SRNP-1467  | 609    | [On]bp |
| Astraptes | creteus       | cranaDHJ01 | [6167]        | 97-SRNP-1465  | 384    | [On]bp |
| Astraptes | creteus       | cranaDHJ01 | [6168]        | 98-SRNP-3078  | 669    | [On]bp |
| Astraptes | creteus       | cranaDHJ01 | [6169]        | 97-SRNP-1253  | 669    | [On]bp |
| Astraptes | creteus       | cranaDHJ01 | [6170]        | 99-SRNP-13963 | 669    | [On]bp |
| Astraptes | creteus       | cranaDHJ02 | [6171]        | 98-SRNP-2979  | 642    | [On]bp |
| Astraptes | creteus       | cranaDHJ02 | [6172]        | 02-SRNP-23727 | 630    | [On]bp |
| Astraptes | creteus       | cranaDHJ02 | [6173]        | 02-SRNP-24378 | 630    | [On]bp |
| Astraptes | creteus       | cranaDHJ02 | [6174]        | 02-SRNP-9497  | 669    | [On]bp |
| Astraptes | creteus       | cranaDHJ02 | [6175]        | 98-SRNP-3853  | 633    | [On]bp |
| Astraptes | creteus       | cranaDHJ02 | [6176]        | 00-SRNP-9497  | 504    | [On]bp |
| Astraptes | creteus       | cranaDHJ02 | [6177]        | 00-SRNP-9363  | 669    | [On]bp |
| Astraptes | creteus       | cranaDHJ02 | [6178]        | 03-SRNP-4452  | 669    | [On]bp |
| Astraptes | creteus       | cranaDHJ02 | [6179]        | 03-SRNP-23876 | 669    | [On]bp |
| Astraptes | creteus       | cranaDHJ02 | [6180]        | 03-SRNP-13379 | 669    | [On]bp |
| Astraptes | creteus       | cranaDHJ02 | [6181]        | 03-SRNP-23795 | 669    | [On]bp |
| Astraptes | creteus       | cranaDHJ02 | [6182]        | 03-SRNP-3042  | 669    | [On]bp |
| Astraptes | creteus       | cranaDHJ02 | [6183]        | 03-SRNP-23880 | 669    | [On]bp |
| Astraptes | creteus       | cranaDHJ02 | [6184]        | 05-SRNP-35359 | 669    | [On]bp |
| Astraptes | creteus       | cranaDHJ02 | [6185]        | 05-SRNP-35230 | 669    | [On]bp |
| Astraptes | creteus       | cranaDHJ02 | [6186]        | 05-SRNP-35582 | 669    | [On]bp |
| Astraptes | creteus       | cranaDHJ02 | [6187]        | 05-SRNP-35228 | 669    | [On]bp |
| Astraptes | creteus       | cranaDHJ02 | [6188]        | 05-SRNP-35253 | 669    | [On]bp |
| Astraptes | creteus       | cranaDHJ02 | [6189]        | 04-SRNP-35324 | 669    | [On]bp |
| Astraptes | creteus       | cranaDHJ02 | [6190]        | 04-SRNP-35590 | 669    | [On]bp |
| Astraptes | creteus       | cranaDHJ02 | [6191]        | 04-SRNP-35599 | 669    | [On]bp |
| Astraptes | creteus       | cranaDHJ02 | [6192]        | 00-SRNP-9654  | 585    | [On]bp |
| Astraptes | creteus       | cranaDHJ02 | [6193]        | 03-SRNP-4174  | 669    | [1n]bp |
| Astraptes | creteus       | cranaDHJ02 | [6194]        | 00-SRNP-9951  | 669    | [On]bp |
| Astraptes | creteus       | cranaDHJ02 | [6195]        | 00-SRNP-9783  | 669    | [On]bp |
| Astraptes | creteus       | cranaDHJ02 | [6196]        | 07-SRNP-57106 | 645    | [On]bp |

|                              |        |               |     |        |
|------------------------------|--------|---------------|-----|--------|
| Astraptes creteus cranaDHJ02 | [6194] | 00-SRNP-9951  | 669 | [0n]bp |
| Astraptes creteus cranaDHJ02 | [6195] | 00-SRNP-9783  | 669 | [0n]bp |
| Astraptes creteus cranaDHJ02 | [6196] | 07-SRNP-57106 | 645 | [0n]bp |
| Astraptes creteus cranaDHJ02 | [6197] | 02-SRNP-8259  | 645 | [0n]bp |
| Astraptes creteus cranaDHJ02 | [6198] | 98-SRNP-2019  | 645 | [0n]bp |
| Astraptes creteus cranaDHJ02 | [6199] | 02-SRNP-9883  | 585 | [0n]bp |
| Astraptes creteus cranaDHJ02 | [6200] | 97-SRNP-1362  | 630 | [0n]bp |
| Astraptes creteus cranaDHJ02 | [6201] | 99-SRNP-291   | 642 | [1n]bp |
| Astraptes creteus cranaDHJ02 | [6202] | 00-SRNP-10716 | 624 | [0n]bp |
| Astraptes creteus cranaDHJ02 | [6203] | 02-SRNP-8156  | 585 | [0n]bp |
| Astraptes creteus cranaDHJ02 | [6204] | 02-SRNP-23538 | 585 | [0n]bp |
| Astraptes creteus cranaDHJ02 | [6205] | 97-SRNP-1617  | 615 | [0n]bp |
| Astraptes creteus cranaDHJ02 | [6206] | 98-SRNP-11988 | 609 | [0n]bp |
| Astraptes creteus cranaDHJ02 | [6207] | 98-SRNP-2628  | 609 | [0n]bp |
| Astraptes creteus cranaDHJ02 | [6208] | 98-SRNP-2871  | 609 | [0n]bp |
| Astraptes creteus cranaDHJ02 | [6209] | 98-SRNP-2709  | 609 | [0n]bp |
| Astraptes creteus cranaDHJ02 | [6210] | 00-SRNP-9398  | 609 | [0n]bp |
| Astraptes creteus cranaDHJ02 | [6211] | 01-SRNP-6265  | 606 | [0n]bp |
| Astraptes creteus cranaDHJ02 | [6212] | 01-SRNP-6809  | 606 | [0n]bp |
| Astraptes creteus cranaDHJ02 | [6213] | 95-SRNP-537   | 363 | [2n]bp |
| Astraptes creteus cranaDHJ02 | [6214] | 94-SRNP-5247  | 609 | [0n]bp |
| Astraptes creteus cranaDHJ02 | [6215] | 98-SRNP-2873  | 588 | [0n]bp |
| Astraptes creteus cranaDHJ02 | [6216] | 07-SRNP-57105 | 639 | [0n]bp |
| Astraptes creteus cranaDHJ02 | [6217] | 02-SRNP-24377 | 669 | [0n]bp |
| Astraptes creteus cranaDHJ02 | [6218] | 01-SRNP-6805  | 669 | [0n]bp |
| Astraptes creteus cranaDHJ02 | [6219] | 01-SRNP-7968  | 669 | [0n]bp |
| Astraptes creteus cranaDHJ02 | [6220] | 02-SRNP-8216  | 669 | [0n]bp |
| Astraptes creteus cranaDHJ02 | [6221] | 01-SRNP-7967  | 669 | [0n]bp |
| Astraptes creteus cranaDHJ02 | [6222] | 02-SRNP-23585 | 669 | [0n]bp |
| Astraptes creteus cranaDHJ02 | [6223] | 02-SRNP-24509 | 669 | [0n]bp |
| Astraptes creteus cranaDHJ02 | [6224] | 02-SRNP-23630 | 669 | [0n]bp |
| Astraptes creteus cranaDHJ02 | [6225] | 01-SRNP-6182  | 669 | [0n]bp |
| Astraptes creteus cranaDHJ02 | [6226] | 01-SRNP-6806  | 669 | [0n]bp |
| Astraptes creteus cranaDHJ02 | [6227] | 02-SRNP-23118 | 669 | [0n]bp |
| Astraptes creteus cranaDHJ02 | [6228] | 02-SRNP-23539 | 669 | [0n]bp |
| Astraptes creteus cranaDHJ02 | [6229] | 98-SRNP-2980  | 669 | [0n]bp |
| Astraptes creteus cranaDHJ02 | [6230] | 97-SRNP-1252  | 669 | [0n]bp |
| Astraptes creteus cranaDHJ02 | [6231] | 97-SRNP-11002 | 669 | [0n]bp |
| Astraptes creteus cranaDHJ02 | [6232] | 02-SRNP-8258  | 669 | [0n]bp |
| Astraptes creteus cranaDHJ02 | [6233] | 00-SRNP-9624  | 669 | [0n]bp |
| Astraptes creteus cranaDHJ02 | [6234] | 98-SRNP-2805  | 669 | [0n]bp |
| Astraptes creteus cranaDHJ02 | [6235] | 00-SRNP-9502  | 669 | [0n]bp |
| Astraptes creteus cranaDHJ02 | [6236] | 98-SRNP-2055  | 669 | [0n]bp |
| Astraptes creteus cranaDHJ02 | [6237] | 98-SRNP-2806  | 669 | [0n]bp |
| Astraptes creteus cranaDHJ02 | [6238] | 98-SRNP-3912  | 669 | [0n]bp |
| Astraptes creteus cranaDHJ02 | [6239] | 97-SRNP-1835  | 669 | [0n]bp |
| Astraptes creteus cranaDHJ02 | [6240] | 06-SRNP-35585 | 669 | [0n]bp |
| Astraptes creteus cranaDHJ02 | [6241] | 06-SRNP-46102 | 669 | [0n]bp |
| Astraptes creteus cranaDHJ02 | [6242] | 07-SRNP-36022 | 669 | [0n]bp |
| Astraptes creteus cranaDHJ02 | [6243] | 07-SRNP-57188 | 669 | [0n]bp |
| Astraptes creteus cranaDHJ02 | [6244] | 07-SRNP-36021 | 669 | [0n]bp |
| Astraptes creteus cranaDHJ02 | [6245] | 07-SRNP-36883 | 669 | [0n]bp |
| Astraptes creteus cranaDHJ02 | [6246] | 08-SRNP-35767 | 669 | [0n]bp |
| Astraptes creteus cranaDHJ02 | [6247] | 08-SRNP-35790 | 669 | [0n]bp |
| Astraptes creteus cranaDHJ02 | [6248] | 08-SRNP-35544 | 669 | [0n]bp |
| Astraptes creteus cranaDHJ02 | [6249] | 09-SRNP-56363 | 669 | [0n]bp |
| Astraptes creteus cranaDHJ02 | [6250] | 09-SRNP-56364 | 669 | [0n]bp |
| Astraptes creteus cranaDHJ02 | [6251] | 02-SRNP-9064  | 669 | [1n]bp |
| Astraptes creteus cranaDHJ02 | [6252] | 04-SRNP-36066 | 669 | [0n]bp |
| Astraptes creteus cranaDHJ02 | [6253] | 09-SRNP-36873 | 669 | [0n]bp |
| Astraptes talus              | [6254] | 03-SRNP-1776  | 540 | [1n]bp |
| Astraptes talus              | [6255] | 02-SRNP-28715 | 570 | [0n]bp |
| Astraptes talus              | [6256] | 05-SRNP-22282 | 657 | [0n]bp |
| Astraptes talus              | [6257] | 07-SRNP-42996 | 669 | [0n]bp |
| Astraptes talus              | [6258] | 06-SRNP-21979 | 669 | [0n]bp |
| Astraptes talus              | [6259] | 06-SRNP-56333 | 669 | [0n]bp |
| Astraptes talus              | [6260] | 05-SRNP-22277 | 669 | [0n]bp |
| Astraptes talus              | [6261] | 05-SRNP-22036 | 669 | [0n]bp |
| Astraptes talus              | [6262] | 05-SRNP-22279 | 669 | [0n]bp |
| Astraptes talus              | [6263] | 05-SRNP-22031 | 669 | [0n]bp |
| Astraptes talus              | [6264] | 05-SRNP-22257 | 669 | [0n]bp |
| Astraptes talus              | [6265] | 05-SRNP-22033 | 669 | [0n]bp |
| Astraptes talus              | [6266] | 07-SRNP-1322  | 663 | [0n]bp |
| Astraptes talus              | [6267] | 05-SRNP-25199 | 453 | [1n]bp |
| Astraptes talus              | [6268] | 05-SRNP-25202 | 642 | [0n]bp |
| Astraptes talus              | [6269] | 07-SRNP-43000 | 669 | [0n]bp |
| Astraptes talus              | [6270] | 08-SRNP-40181 | 669 | [0n]bp |
| Astraptes talus              | [6271] | 09-SRNP-41979 | 669 | [0n]bp |
| Astraptes talus              | [6272] | 09-SRNP-41975 | 669 | [0n]bp |
| Astraptes talus              | [6273] | 09-SRNP-41973 | 669 | [0n]bp |
| Astraptes talus              | [6274] | 09-SRNP-41980 | 669 | [0n]bp |
| Astraptes talus              | [6275] | 09-SRNP-41977 | 669 | [0n]bp |
| Astraptes talus              | [6276] | 09-SRNP-41974 | 669 | [0n]bp |
| Astraptes talus              | [6277] | 09-SRNP-41983 | 669 | [0n]bp |
| Astraptes talus              | [6278] | 09-SRNP-41978 | 669 | [0n]bp |
| Astraptes talus              | [6279] | 09-SRNP-41982 | 669 | [0n]bp |
| Autochton longipennis        | [6280] | 01-SRNP-2960  | 390 | [0n]bp |
| Achalarus albociliatus       | [6281] | 05-SRNP-56408 | 636 | [0n]bp |
| Achalarus albociliatus       | [6282] | 96-SRNP-1083  | 570 | [0n]bp |
| Achalarus albociliatus       | [6283] | 00-SRNP-6810  | 582 | [3n]bp |
| Achalarus albociliatus       | [6284] | 02-SRNP-14451 | 669 | [0n]bp |
| Achalarus albociliatus       | [6285] | 02-SRNP-14113 | 669 | [0n]bp |
| Achalarus albociliatus       | [6286] | 02-SRNP-14234 | 669 | [0n]bp |
| Achalarus albociliatus       | [6287] | 00-SRNP-6827  | 669 | [0n]bp |
| Achalarus albociliatus       | [6288] | 02-SRNP-4786  | 669 | [1n]bp |
| Achalarus albociliatus       | [6289] | 07-SRNP-12984 | 669 | [0n]bp |
| Achalarus toxeus             | [6290] | 96-SRNP-8690  | 576 | [0n]bp |
| Achalarus toxeus             | [6291] | 93-SRNP-7539  | 396 | [0n]bp |
| Achalarus toxeus             | [6292] | 02-SRNP-10179 | 669 | [0n]bp |
| Achalarus toxeus             | [6293] | 02-SRNP-10180 | 669 | [0n]bp |
| Achalarus toxeus             | [6294] | 03-SRNP-237   | 669 | [0n]bp |
| Thessia jalapus              | [6295] | 08-SRNP-22900 | 669 | [0n]bp |
| Thessia jalapus              | [6296] | 97-SRNP-4702  | 639 | [0n]bp |



```

Achaiaurus toxeus|[6294]|03-SRNP-231|669[0n]bp
Thessia jalapus|[6295]|08-SRNP-22900|669[0n]bp
Thessia jalapus|[6296]|97-SRNP-4702|639[0n]bp
Thessia jalapus|[6297]|08-SRNP-22673|669[0n]bp
Thessia jalapus|[6298]|08-SRNP-30977|669[0n]bp
Thessia jalapus|[6299]|08-SRNP-30974|669[0n]bp
Thessia jalapus|[6300]|02-SRNP-13559|669[0n]bp
Thessia jalapus|[6301]|08-SRNP-30979|669[0n]bp
Thessia jalapus|[6302]|09-SRNP-30937|408[0n]bp
Thessia jalapus|[6303]|09-SRNP-20372|669[0n]bp
Thessia jalapus|[6304]|08-SRNP-23350|669[0n]bp
Thessia jalapus|[6305]|09-SRNP-20138|669[0n]bp
Thessia jalapus|[6306]|08-SRNP-24707|669[0n]bp
Thessia jalapus|[6307]|04-SRNP-22865|669[0n]bp
Thessia jalapus|[6308]|08-SRNP-55016|669[0n]bp
Thessia jalapus|[6309]|08-SRNP-30973|669[0n]bp
Thessia jalapus|[6310]|07-SRNP-55386|669[0n]bp
Thessia jalapus|[6311]|02-SRNP-13729|669[0n]bp
Thessia jalapus|[6312]|02-SRNP-13560|669[0n]bp
Thessia jalapus|[6313]|02-SRNP-4830|669[0n]bp
Thessia jalapus|[6314]|02-SRNP-14049|669[0n]bp
Thessia jalapus|[6315]|04-SRNP-14601|669[0n]bp
Thessia jalapus|[6316]|07-SRNP-21140|663[0n]bp
Thessia jalapus|[6317]|97-SRNP-4570|573[0n]bp
Thessia jalapus|[6318]|08-SRNP-21898|669[0n]bp
Thessia jalapus|[6319]|09-SRNP-20140|669[0n]bp
Astraptus phalaecus|[6320]|00-SRNP-17853|630[0n]bp
Astraptus phalaecus|[6321]|09-SRNP-33034|669[0n]bp
Astraptus phalaecus|[6322]|09-SRNP-33035|669[0n]bp
Urbanus albimargo|[6323]|99-SRNP-6189|642[0n]bp
Urbanus albimargo|[6324]|05-SRNP-55418|687[0n]bp
Urbanus albimargo|[6325]|97-SRNP-4266|396[0n]bp
Urbanus albimargo|[6326]|06-SRNP-2798|633[0n]bp
Urbanus albimargo|[6327]|08-SRNP-4797|669[0n]bp
Urbanus albimargo|[6328]|08-SRNP-4799|669[0n]bp
Urbanus albimargo|[6329]|08-SRNP-4798|669[0n]bp
Urbanus doryssusDHJ01|[6330]|09-SRNP-65298|669[0n]bp
Urbanus doryssusDHJ01|[6331]|08-SRNP-66077|669[0n]bp
Urbanus doryssusDHJ01|[6332]|08-SRNP-65793|669[0n]bp
Urbanus doryssusDHJ01|[6333]|08-SRNP-32448|669[0n]bp
Urbanus doryssusDHJ01|[6334]|08-SRNP-65792|669[0n]bp
Urbanus doryssusDHJ01|[6335]|08-SRNP-30716|669[0n]bp
Urbanus doryssusDHJ01|[6336]|08-SRNP-65388|669[0n]bp
Urbanus doryssusDHJ01|[6337]|08-SRNP-41168|669[0n]bp
Urbanus doryssusDHJ01|[6338]|08-SRNP-30697|669[0n]bp
Urbanus doryssusDHJ01|[6339]|08-SRNP-65154|669[0n]bp
Urbanus doryssusDHJ01|[6340]|07-SRNP-33176|669[0n]bp
Urbanus doryssusDHJ01|[6341]|07-SRNP-65317|669[0n]bp
Urbanus doryssusDHJ01|[6342]|07-SRNP-32796|669[0n]bp
Urbanus doryssusDHJ01|[6343]|07-SRNP-65529|669[0n]bp
Urbanus doryssusDHJ01|[6344]|07-SRNP-41431|669[0n]bp
Urbanus doryssusDHJ01|[6345]|07-SRNP-32630|669[0n]bp
Urbanus doryssusDHJ01|[6346]|07-SRNP-32039|669[0n]bp
Urbanus doryssusDHJ01|[6347]|07-SRNP-30997|669[0n]bp
Urbanus doryssusDHJ01|[6348]|07-SRNP-21334|669[0n]bp
Urbanus doryssusDHJ01|[6349]|02-SRNP-6305|669[0n]bp
Urbanus doryssusDHJ01|[6350]|06-SRNP-31223|669[0n]bp
Urbanus doryssusDHJ01|[6351]|07-SRNP-32446|642[0n]bp
Urbanus doryssusDHJ01|[6352]|04-SRNP-42344|618[0n]bp
Urbanus doryssusDHJ01|[6353]|07-SRNP-41459|660[0n]bp
Urbanus doryssusDHJ01|[6354]|05-SRNP-70279|396[0n]bp
Urbanus doryssusDHJ01|[6355]|09-SRNP-30058|645[0n]bp
Urbanus doryssusDHJ01|[6356]|09-SRNP-33053|639[0n]bp
Urbanus doryssusDHJ01|[6357]|09-SRNP-31697|669[0n]bp
Urbanus doryssusDHJ01|[6358]|09-SRNP-31399|669[0n]bp
Urbanus doryssusDHJ01|[6359]|09-SRNP-80602|669[0n]bp
Urbanus doryssusDHJ01|[6360]|09-SRNP-32813|630[0n]bp
Urbanus doryssusDHJ03|[6361]|04-SRNP-46471|669[0n]bp
Urbanus doryssusDHJ03|[6362]|04-SRNP-46473|669[0n]bp
Urbanus doryssusDHJ02|[6363]|05-SRNP-2102|669[0n]bp
Urbanus doryssusDHJ02|[6364]|05-SRNP-65996|669[0n]bp
Urbanus doryssusDHJ02|[6365]|06-SRNP-1298|669[2n]bp
Urbanus doryssusDHJ02|[6366]|07-SRNP-59558|669[0n]bp
Urbanus doryssusDHJ02|[6367]|04-SRNP-46474|627[0n]bp
Urbanus doryssusDHJ02|[6368]|06-SRNP-3568|669[0n]bp
Urbanus doryssusDHJ02|[6369]|09-SRNP-44478|669[0n]bp
Urbanus doryssusDHJ02|[6370]|09-SRNP-44475|669[0n]bp
Urbanus doryssusDHJ02|[6371]|96-SRNP-11042|618[0n]bp
Urbanus doryssusDHJ02|[6372]|05-SRNP-2322|669[0n]bp
Urbanus doryssusDHJ02|[6373]|09-SRNP-65637|636[0n]bp
Urbanus doryssusDHJ02|[6374]|05-SRNP-20746|669[0n]bp
Urbanus doryssusDHJ02|[6375]|08-SRNP-1784|669[0n]bp
Urbanus doryssusDHJ02|[6376]|08-SRNP-1779|669[0n]bp
Urbanus doryssusDHJ02|[6377]|09-SRNP-20147|669[0n]bp
Urbanus doryssusDHJ02|[6378]|09-SRNP-65199|669[0n]bp
Urbanus doryssusDHJ02|[6379]|08-SRNP-1324|669[0n]bp
Urbanus doryssusDHJ02|[6380]|08-SRNP-1771|669[0n]bp
Urbanus doryssusDHJ02|[6381]|08-SRNP-1774|669[0n]bp
Urbanus doryssusDHJ02|[6382]|08-SRNP-2350|669[0n]bp
Urbanus doryssusDHJ02|[6383]|07-SRNP-1310|669[0n]bp
Urbanus doryssusDHJ02|[6384]|07-SRNP-1447|669[0n]bp
Urbanus doryssusDHJ02|[6385]|06-SRNP-3275|669[0n]bp
Urbanus doryssusDHJ02|[6386]|06-SRNP-3569|669[0n]bp
Urbanus doryssusDHJ02|[6387]|06-SRNP-20390|669[0n]bp
Urbanus doryssusDHJ02|[6388]|05-SRNP-2104|669[0n]bp
Urbanus doryssusDHJ02|[6389]|05-SRNP-2309|669[0n]bp
Urbanus doryssusDHJ02|[6390]|05-SRNP-2103|669[0n]bp
Urbanus doryssusDHJ02|[6391]|05-SRNP-2105|669[0n]bp
Urbanus doryssusDHJ02|[6392]|05-SRNP-46461|669[0n]bp
Urbanus doryssusDHJ02|[6393]|05-SRNP-2108|669[0n]bp
Urbanus doryssusDHJ02|[6394]|05-SRNP-2339|669[0n]bp
Urbanus doryssusDHJ02|[6395]|05-SRNP-46459|669[0n]bp
Urbanus doryssusDHJ02|[6396]|05-SRNP-2106|669[0n]bp

```

Urbanus doryssusDHJ02|[6394]|05-SRNP-2339|669[0n]bp  
 Urbanus doryssusDHJ02|[6395]|05-SRNP-46459|669[0n]bp  
 Urbanus doryssusDHJ02|[6396]|05-SRNP-2106|669[0n]bp  
 Urbanus doryssusDHJ02|[6397]|08-SRNP-2185|666[0n]bp  
 Urbanus doryssusDHJ02|[6398]|06-SRNP-3214|669[0n]bp  
 Urbanus doryssusDHJ02|[6399]|08-SRNP-1781|669[0n]bp  
 Urbanus doryssusDHJ02|[6400]|07-SRNP-1739|612[0n]bp  
 Urbanus doryssusDHJ02|[6401]|06-SRNP-1796|633[0n]bp  
 Urbanus doryssusDHJ02|[6402]|93-SRNP-4324|564[0n]bp  
 Urbanus doryssusDHJ02|[6403]|09-SRNP-65198|606[0n]bp  
 Urbanus doryssusDHJ02|[6404]|09-SRNP-65161|618[0n]bp  
 Urbanus doryssusDHJ02|[6405]|09-SRNP-68103|669[0n]bp  
 Urbanus doryssusDHJ02|[6406]|05-SRNP-58857|669[0n]bp  
 Urbanus doryssusDHJ02|[6407]|04-SRNP-22318|669[0n]bp  
 Urbanus doryssusDHJ02|[6408]|04-SRNP-22317|669[0n]bp  
 Urbanus doryssusDHJ02|[6409]|04-SRNP-48319|669[0n]bp  
 Urbanus doryssusDHJ02|[6410]|06-SRNP-3376|669[0n]bp  
 Urbanus doryssusDHJ02|[6411]|08-SRNP-2186|669[0n]bp  
 Urbanus doryssusDHJ02|[6412]|09-SRNP-23060|669[0n]bp  
 Urbanus teleus|[6413]|01-SRNP-16521|669[0n]bp  
 Urbanus teleus|[6414]|97-SRNP-3309|513[23n]bp  
 Urbanus teleus|[6415]|00-SRNP-4055|669[0n]bp  
 Urbanus teleus|[6416]|00-SRNP-4054|669[0n]bp  
 Urbanus teleus|[6417]|04-SRNP-30475|669[0n]bp  
 Urbanus teleus|[6418]|07-SRNP-55852|669[0n]bp  
 Urbanus teleus|[6419]|07-SRNP-55853|669[0n]bp  
 Urbanus teleus|[6420]|07-SRNP-58338|669[0n]bp  
 Autochton zarex|[6421]|04-SRNP-42624|669[0n]bp  
 Autochton zarex|[6422]|05-SRNP-57363|669[0n]bp  
 Autochton zarex|[6423]|05-SRNP-43733|669[0n]bp  
 Autochton zarex|[6424]|07-SRNP-58889|642[0n]bp  
 Autochton zarex|[6425]|05-SRNP-59312|669[0n]bp  
 Autochton zarex|[6426]|06-SRNP-23079|669[0n]bp  
 Autochton zarex|[6427]|03-SRNP-8036|639[3n]bp  
 Autochton zarex|[6428]|95-SRNP-7760|411[0n]bp  
 Autochton zarex|[6429]|97-SRNP-5452|618[0n]bp  
 Autochton zarex|[6430]|97-SRNP-4767|552[2n]bp  
 Autochton zarex|[6431]|06-SRNP-22476|645[0n]bp  
 Autochton zarex|[6432]|08-SRNP-70876|669[0n]bp  
 Urbanus dorantes|[6433]|05-SRNP-34161|627[0n]bp  
 Urbanus dorantes|[6434]|05-SRNP-6828|627[0n]bp  
 Urbanus dorantes|[6435]|07-SRNP-65123|636[0n]bp  
 Urbanus dorantes|[6436]|02-SRNP-1897|570[0n]bp  
 Urbanus dorantes|[6437]|02-SRNP-15449|645[0n]bp  
 Urbanus dorantes|[6438]|06-SRNP-1986|669[0n]bp  
 Urbanus dorantes|[6439]|06-SRNP-30970|669[0n]bp  
 Urbanus dorantes|[6440]|05-SRNP-59442|669[0n]bp  
 Urbanus dorantes|[6441]|04-SRNP-16100|669[0n]bp  
 Urbanus dorantes|[6442]|05-SRNP-42411|573[0n]bp  
 Urbanus dorantes|[6443]|06-SRNP-3492|666[0n]bp  
 Urbanus dorantes|[6444]|07-SRNP-32150|669[0n]bp  
 Urbanus dorantes|[6445]|07-SRNP-56431|669[0n]bp  
 Urbanus dorantes|[6446]|07-SRNP-45404|669[0n]bp  
 Urbanus dorantes|[6447]|07-SRNP-45405|669[0n]bp  
 Urbanus dorantes|[6448]|08-SRNP-72130|669[0n]bp  
 Astraptes egregiusDHJ01|[6449]|06-SRNP-41788|669[0n]bp  
 Astraptes egregiusDHJ01|[6450]|05-SRNP-40504|669[0n]bp  
 Astraptes egregiusDHJ01|[6451]|04-SRNP-56511|669[0n]bp  
 Astraptes egregiusDHJ01|[6452]|07-SRNP-21401|648[0n]bp  
 Astraptes egregiusDHJ02|[6453]|02-SRNP-15436|624[0n]bp  
 Astraptes egregiusDHJ02|[6454]|03-SRNP-21843|576[0n]bp  
 Astraptes egregiusDHJ02|[6455]|96-SRNP-11827|570[0n]bp  
 Astraptes egregiusDHJ02|[6456]|05-SRNP-59306|669[0n]bp  
 Astraptes egregiusDHJ02|[6457]|06-SRNP-40597|669[0n]bp  
 Astraptes egregiusDHJ02|[6458]|07-SRNP-40219|669[0n]bp  
 Astraptes egregiusDHJ02|[6459]|08-SRNP-36561|669[0n]bp  
 Urbanus simplicius|[6460]|04-SRNP-45191|666[0n]bp  
 Urbanus simplicius|[6461]|04-SRNP-30838|669[0n]bp  
 Urbanus simplicius|[6462]|02-SRNP-5635|645[0n]bp  
 Urbanus simplicius|[6463]|07-SRNP-20188|669[0n]bp  
 Urbanus simplicius|[6464]|07-SRNP-20175|669[0n]bp  
 Urbanus simplicius|[6465]|07-SRNP-20181|669[0n]bp  
 Urbanus simplicius|[6466]|07-SRNP-20078|669[0n]bp  
 Urbanus simplicius|[6467]|06-SRNP-20658|669[0n]bp  
 Urbanus simplicius|[6468]|06-SRNP-58893|669[0n]bp  
 Urbanus simplicius|[6469]|04-SRNP-45789|669[0n]bp  
 Urbanus simplicius|[6470]|02-SRNP-4745|639[0n]bp  
 Urbanus simplicius|[6471]|07-SRNP-20177|669[0n]bp  
 Urbanus simplicius|[6472]|08-SRNP-58533|669[0n]bp  
 Urbanus simplicius|[6473]|08-SRNP-24796|669[0n]bp  
 Astraptes aulus|[6474]|97-SRNP-10301|639[0n]bp  
 Astraptes aulus|[6475]|06-SRNP-55030|663[5n]bp  
 Astraptes aulus|[6476]|94-SRNP-7852|399[0n]bp  
 Astraptes aulus|[6477]|05-SRNP-12046|669[0n]bp  
 Astraptes aulus|[6478]|05-SRNP-64313|669[0n]bp  
 Astraptes aulus|[6479]|06-SRNP-60359|669[0n]bp  
 Astraptes janeiraDHJ01|[6480]|06-SRNP-6959|669[0n]bp  
 Astraptes janeiraDHJ01|[6481]|09-SRNP-65806|669[0n]bp  
 Astraptes janeiraDHJ02|[6482]|08-SRNP-65223|669[1n]bp  
 Astraptes janeiraDHJ02|[6483]|08-SRNP-31029|669[0n]bp  
 Astraptes janeiraDHJ02|[6484]|08-SRNP-40223|669[0n]bp  
 Astraptes janeiraDHJ02|[6485]|08-SRNP-65370|669[0n]bp  
 Astraptes janeiraDHJ02|[6486]|04-SRNP-1932|669[0n]bp  
 Astraptes janeiraDHJ02|[6487]|03-SRNP-21497|657[0n]bp  
 Astraptes janeiraDHJ02|[6488]|05-SRNP-43094|630[0n]bp  
 Astraptes janeiraDHJ02|[6489]|05-SRNP-21164|669[0n]bp  
 Astraptes janeiraDHJ02|[6490]|05-SRNP-21166|669[0n]bp  
 Astraptes janeiraDHJ02|[6491]|99-SRNP-2448|630[0n]bp  
 Astraptes janeiraDHJ02|[6492]|02-SRNP-5607|585[0n]bp  
 Astraptes janeiraDHJ02|[6493]|05-SRNP-32361|624[0n]bp  
 Astraptes janeiraDHJ02|[6494]|06-SRNP-2015|669[0n]bp  
 Astraptes janeiraDHJ02|[6495]|09-SRNP-67362|669[0n]bp  
 Astraptes enotrus|[6496]|03-SRNP-3278|630[2n]bp

|         |         |        |               |               |         |        |              |     |      |    |
|---------|---------|--------|---------------|---------------|---------|--------|--------------|-----|------|----|
| Astrapt | janeira | DHJ02  | [6494]        | 06-SRNP-2015  | 669     | [0n]   | bp           |     |      |    |
| Astrapt | janeira | DHJ02  | [6495]        | 09-SRNP-67362 | 669     | [0n]   | bp           |     |      |    |
|         |         |        |               | Astrapt       | enotrus | [6496] | 03-SRNP-3278 | 630 | [2n] | bp |
| Astrapt | enotrus | [6497] | 08-SRNP-4337  | 321           | [0n]    | bp     |              |     |      |    |
| Astrapt | enotrus | [6498] | 08-SRNP-66239 | 669           | [3n]    | bp     |              |     |      |    |
| Astrapt | enotrus | [6499] | 08-SRNP-2132  | 669           | [3n]    | bp     |              |     |      |    |
| Astrapt | enotrus | [6500] | 02-SRNP-29258 | 657           | [3n]    | bp     |              |     |      |    |
| Astrapt | enotrus | [6501] | 08-SRNP-4382  | 642           | [0n]    | bp     |              |     |      |    |
| Astrapt | enotrus | [6502] | 07-SRNP-45300 | 642           | [0n]    | bp     |              |     |      |    |
| Astrapt | enotrus | [6503] | 07-SRNP-57189 | 642           | [0n]    | bp     |              |     |      |    |
| Astrapt | enotrus | [6504] | 07-SRNP-2586  | 669           | [0n]    | bp     |              |     |      |    |
| Astrapt | enotrus | [6505] | 03-SRNP-8361  | 663           | [0n]    | bp     |              |     |      |    |
| Astrapt | enotrus | [6506] | 07-SRNP-45178 | 639           | [0n]    | bp     |              |     |      |    |
| Astrapt | enotrus | [6507] | 03-SRNP-1513  | 570           | [0n]    | bp     |              |     |      |    |
| Astrapt | enotrus | [6508] | 04-SRNP-32395 | 669           | [1n]    | bp     |              |     |      |    |
| Astrapt | enotrus | [6509] | 05-SRNP-31823 | 669           | [0n]    | bp     |              |     |      |    |
| Astrapt | enotrus | [6510] | 04-SRNP-30579 | 669           | [0n]    | bp     |              |     |      |    |
| Astrapt | enotrus | [6511] | 04-SRNP-33020 | 669           | [0n]    | bp     |              |     |      |    |
| Astrapt | enotrus | [6512] | 04-SRNP-30578 | 669           | [0n]    | bp     |              |     |      |    |
| Astrapt | enotrus | [6513] | 04-SRNP-31311 | 669           | [0n]    | bp     |              |     |      |    |
| Astrapt | enotrus | [6514] | 04-SRNP-32345 | 669           | [0n]    | bp     |              |     |      |    |
| Astrapt | enotrus | [6515] | 04-SRNP-22616 | 669           | [0n]    | bp     |              |     |      |    |
| Astrapt | enotrus | [6516] | 04-SRNP-1431  | 669           | [0n]    | bp     |              |     |      |    |
| Astrapt | enotrus | [6517] | 04-SRNP-4633  | 669           | [1n]    | bp     |              |     |      |    |
| Astrapt | enotrus | [6518] | 01-SRNP-9736  | 669           | [0n]    | bp     |              |     |      |    |
| Astrapt | enotrus | [6519] | 06-SRNP-23089 | 615           | [1n]    | bp     |              |     |      |    |
| Astrapt | enotrus | [6520] | 04-SRNP-47730 | 669           | [0n]    | bp     |              |     |      |    |
| Astrapt | enotrus | [6521] | 03-SRNP-20571 | 669           | [0n]    | bp     |              |     |      |    |
| Astrapt | enotrus | [6522] | 03-SRNP-19578 | 669           | [0n]    | bp     |              |     |      |    |
| Astrapt | enotrus | [6523] | 08-SRNP-2124  | 630           | [3n]    | bp     |              |     |      |    |
| Astrapt | enotrus | [6524] | 06-SRNP-36179 | 666           | [0n]    | bp     |              |     |      |    |
| Astrapt | enotrus | [6525] | 01-SRNP-1057  | 669           | [1n]    | bp     |              |     |      |    |
| Astrapt | enotrus | [6526] | 03-SRNP-10882 | 669           | [1n]    | bp     |              |     |      |    |
| Astrapt | enotrus | [6527] | 04-SRNP-4407  | 669           | [1n]    | bp     |              |     |      |    |
| Astrapt | enotrus | [6528] | 04-SRNP-4531  | 669           | [1n]    | bp     |              |     |      |    |
| Astrapt | enotrus | [6529] | 04-SRNP-15289 | 669           | [1n]    | bp     |              |     |      |    |
| Astrapt | enotrus | [6530] | 04-SRNP-23231 | 627           | [0n]    | bp     |              |     |      |    |
| Astrapt | enotrus | [6531] | 03-SRNP-5824  | 645           | [0n]    | bp     |              |     |      |    |
| Astrapt | enotrus | [6532] | 06-SRNP-40208 | 657           | [0n]    | bp     |              |     |      |    |
| Astrapt | enotrus | [6533] | 07-SRNP-31387 | 660           | [0n]    | bp     |              |     |      |    |
| Astrapt | enotrus | [6534] | 95-SRNP-7803  | 621           | [0n]    | bp     |              |     |      |    |
| Astrapt | enotrus | [6535] | 99-SRNP-4986  | 615           | [0n]    | bp     |              |     |      |    |
| Astrapt | enotrus | [6536] | 00-SRNP-1877  | 651           | [1n]    | bp     |              |     |      |    |
| Astrapt | enotrus | [6537] | 98-SRNP-4808  | 636           | [0n]    | bp     |              |     |      |    |
| Astrapt | enotrus | [6538] | 02-SRNP-18995 | 630           | [1n]    | bp     |              |     |      |    |
| Astrapt | enotrus | [6539] | 07-SRNP-35000 | 609           | [0n]    | bp     |              |     |      |    |
| Astrapt | enotrus | [6540] | 03-SRNP-20573 | 669           | [1n]    | bp     |              |     |      |    |
| Astrapt | enotrus | [6541] | 06-SRNP-23433 | 660           | [0n]    | bp     |              |     |      |    |
| Astrapt | enotrus | [6542] | 03-SRNP-5834  | 669           | [0n]    | bp     |              |     |      |    |
| Astrapt | enotrus | [6543] | 08-SRNP-1658  | 660           | [0n]    | bp     |              |     |      |    |
| Astrapt | enotrus | [6544] | 08-SRNP-65001 | 669           | [0n]    | bp     |              |     |      |    |
| Astrapt | enotrus | [6545] | 04-SRNP-23876 | 669           | [0n]    | bp     |              |     |      |    |
| Astrapt | enotrus | [6546] | 04-SRNP-48434 | 669           | [0n]    | bp     |              |     |      |    |
| Astrapt | enotrus | [6547] | 04-SRNP-48802 | 669           | [0n]    | bp     |              |     |      |    |
| Astrapt | enotrus | [6548] | 04-SRNP-4532  | 669           | [0n]    | bp     |              |     |      |    |
| Astrapt | enotrus | [6549] | 03-SRNP-37547 | 669           | [0n]    | bp     |              |     |      |    |
| Astrapt | enotrus | [6550] | 02-SRNP-30318 | 669           | [0n]    | bp     |              |     |      |    |
| Astrapt | enotrus | [6551] | 03-SRNP-23940 | 669           | [0n]    | bp     |              |     |      |    |
| Astrapt | enotrus | [6552] | 07-SRNP-30922 | 669           | [0n]    | bp     |              |     |      |    |
| Astrapt | enotrus | [6553] | 07-SRNP-895   | 669           | [0n]    | bp     |              |     |      |    |
| Astrapt | enotrus | [6554] | 06-SRNP-23363 | 669           | [0n]    | bp     |              |     |      |    |
| Astrapt | enotrus | [6555] | 07-SRNP-32164 | 669           | [0n]    | bp     |              |     |      |    |
| Astrapt | enotrus | [6556] | 07-SRNP-31091 | 669           | [0n]    | bp     |              |     |      |    |
| Astrapt | enotrus | [6557] | 07-SRNP-40850 | 669           | [0n]    | bp     |              |     |      |    |
| Astrapt | enotrus | [6558] | 07-SRNP-2585  | 669           | [0n]    | bp     |              |     |      |    |
| Astrapt | enotrus | [6559] | 07-SRNP-23362 | 669           | [0n]    | bp     |              |     |      |    |
| Astrapt | enotrus | [6560] | 03-SRNP-4337  | 669           | [0n]    | bp     |              |     |      |    |
| Astrapt | enotrus | [6561] | 00-SRNP-3195  | 669           | [0n]    | bp     |              |     |      |    |
| Astrapt | enotrus | [6562] | 03-SRNP-20168 | 669           | [0n]    | bp     |              |     |      |    |
| Astrapt | enotrus | [6563] | 03-SRNP-5007  | 669           | [0n]    | bp     |              |     |      |    |
| Astrapt | enotrus | [6564] | 03-SRNP-38023 | 669           | [0n]    | bp     |              |     |      |    |
| Astrapt | enotrus | [6565] | 01-SRNP-1374  | 669           | [0n]    | bp     |              |     |      |    |
| Astrapt | enotrus | [6566] | 01-SRNP-578   | 669           | [0n]    | bp     |              |     |      |    |
| Astrapt | enotrus | [6567] | 04-SRNP-4535  | 669           | [0n]    | bp     |              |     |      |    |
| Astrapt | enotrus | [6568] | 04-SRNP-15007 | 669           | [0n]    | bp     |              |     |      |    |
| Astrapt | enotrus | [6569] | 04-SRNP-61500 | 669           | [0n]    | bp     |              |     |      |    |
| Astrapt | enotrus | [6570] | 04-SRNP-55371 | 669           | [0n]    | bp     |              |     |      |    |
| Astrapt | enotrus | [6571] | 02-SRNP-29261 | 669           | [0n]    | bp     |              |     |      |    |
| Astrapt | enotrus | [6572] | 02-SRNP-4701  | 669           | [0n]    | bp     |              |     |      |    |
| Astrapt | enotrus | [6573] | 02-SRNP-29260 | 669           | [0n]    | bp     |              |     |      |    |
| Astrapt | enotrus | [6574] | 02-SRNP-18992 | 669           | [0n]    | bp     |              |     |      |    |
| Astrapt | enotrus | [6575] | 04-SRNP-14410 | 669           | [0n]    | bp     |              |     |      |    |
| Astrapt | enotrus | [6576] | 02-SRNP-19031 | 669           | [0n]    | bp     |              |     |      |    |
| Astrapt | enotrus | [6577] | 02-SRNP-4310  | 669           | [0n]    | bp     |              |     |      |    |
| Astrapt | enotrus | [6578] | 00-SRNP-12241 | 669           | [0n]    | bp     |              |     |      |    |
| Astrapt | enotrus | [6579] | 02-SRNP-29259 | 669           | [0n]    | bp     |              |     |      |    |
| Astrapt | enotrus | [6580] | 03-SRNP-21678 | 669           | [0n]    | bp     |              |     |      |    |
| Astrapt | enotrus | [6581] | 03-SRNP-27838 | 669           | [0n]    | bp     |              |     |      |    |
| Astrapt | enotrus | [6582] | 01-SRNP-569   | 669           | [0n]    | bp     |              |     |      |    |
| Astrapt | enotrus | [6583] | 04-SRNP-16060 | 669           | [0n]    | bp     |              |     |      |    |
| Astrapt | enotrus | [6584] | 03-SRNP-7340  | 669           | [0n]    | bp     |              |     |      |    |
| Astrapt | enotrus | [6585] | 03-SRNP-1596  | 669           | [0n]    | bp     |              |     |      |    |
| Astrapt | enotrus | [6586] | 07-SRNP-60787 | 669           | [0n]    | bp     |              |     |      |    |
| Astrapt | enotrus | [6587] | 08-SRNP-65002 | 669           | [0n]    | bp     |              |     |      |    |
| Astrapt | enotrus | [6588] | 08-SRNP-30981 | 669           | [0n]    | bp     |              |     |      |    |
| Astrapt | enotrus | [6589] | 08-SRNP-40360 | 669           | [0n]    | bp     |              |     |      |    |
| Astrapt | enotrus | [6590] | 08-SRNP-2125  | 669           | [0n]    | bp     |              |     |      |    |
| Astrapt | enotrus | [6591] | 08-SRNP-2321  | 669           | [0n]    | bp     |              |     |      |    |
| Astrapt | enotrus | [6592] | 08-SRNP-65460 | 669           | [0n]    | bp     |              |     |      |    |
| Astrapt | enotrus | [6593] | 08-SRNP-65411 | 669           | [0n]    | bp     |              |     |      |    |
| Astrapt | enotrus | [6594] | 08-SRNP-20582 | 669           | [0n]    | bp     |              |     |      |    |
| Astrapt | enotrus | [6595] | 08-SRNP-20893 | 669           | [0n]    | bp     |              |     |      |    |
| Astrapt | enotrus | [6596] | 08-SRNP-1656  | 669           | [0n]    | bp     |              |     |      |    |

|            |          |        |               |     |        |
|------------|----------|--------|---------------|-----|--------|
| Astraptes  | enotrus  | [6594] | 08-SRNP-20582 | 669 | [0n]bp |
| Astraptes  | enotrus  | [6595] | 08-SRNP-20893 | 669 | [0n]bp |
| Astraptes  | enotrus  | [6596] | 08-SRNP-1656  | 669 | [0n]bp |
| Astraptes  | enotrus  | [6597] | 08-SRNP-40359 | 669 | [0n]bp |
| Astraptes  | enotrus  | [6598] | 08-SRNP-1657  | 669 | [0n]bp |
| Astraptes  | enotrus  | [6599] | 08-SRNP-56038 | 669 | [0n]bp |
| Astraptes  | enotrus  | [6600] | 05-SRNP-30647 | 669 | [0n]bp |
| Astraptes  | enotrus  | [6601] | 05-SRNP-30648 | 669 | [0n]bp |
| Astraptes  | enotrus  | [6602] | 05-SRNP-791   | 669 | [0n]bp |
| Astraptes  | enotrus  | [6603] | 05-SRNP-30598 | 669 | [0n]bp |
| Astraptes  | enotrus  | [6604] | 09-SRNP-32555 | 669 | [0n]bp |
| Astraptes  | enotrus  | [6605] | 09-SRNP-20260 | 669 | [0n]bp |
| Astraptes  | enotrus  | [6606] | 06-SRNP-2122  | 669 | [0n]bp |
| Astraptes  | enotrus  | [6607] | 06-SRNP-32266 | 669 | [0n]bp |
| Astraptes  | enotrus  | [6608] | 06-SRNP-35215 | 669 | [0n]bp |
| Astraptes  | enotrus  | [6609] | 06-SRNP-22782 | 669 | [0n]bp |
| Astraptes  | enotrus  | [6610] | 09-SRNP-22799 | 669 | [0n]bp |
| Astraptes  | enotrus  | [6611] | 09-SRNP-20286 | 669 | [0n]bp |
| Chioides   | catillus | [6612] | 07-SRNP-57955 | 669 | [0n]bp |
| Chioides   | catillus | [6613] | 07-SRNP-20324 | 666 | [0n]bp |
| Chioides   | catillus | [6614] | 06-SRNP-21086 | 666 | [0n]bp |
| Chioides   | catillus | [6615] | 07-SRNP-938   | 669 | [0n]bp |
| Chioides   | catillus | [6616] | 07-SRNP-58548 | 669 | [0n]bp |
| Chioides   | catillus | [6617] | 07-SRNP-32811 | 669 | [0n]bp |
| Chioides   | catillus | [6618] | 07-SRNP-939   | 669 | [0n]bp |
| Chioides   | catillus | [6619] | 07-SRNP-20124 | 669 | [0n]bp |
| Chioides   | catillus | [6620] | 07-SRNP-22429 | 669 | [0n]bp |
| Chioides   | catillus | [6621] | 07-SRNP-20115 | 669 | [0n]bp |
| Chioides   | catillus | [6622] | 07-SRNP-20187 | 669 | [0n]bp |
| Chioides   | catillus | [6623] | 07-SRNP-20128 | 669 | [0n]bp |
| Chioides   | catillus | [6624] | 07-SRNP-45146 | 669 | [0n]bp |
| Chioides   | catillus | [6625] | 05-SRNP-45682 | 669 | [0n]bp |
| Chioides   | catillus | [6626] | 04-SRNP-34914 | 669 | [0n]bp |
| Chioides   | catillus | [6627] | 04-SRNP-56106 | 669 | [0n]bp |
| Chioides   | catillus | [6628] | 04-SRNP-23839 | 669 | [0n]bp |
| Chioides   | catillus | [6629] | 04-SRNP-34756 | 669 | [0n]bp |
| Chioides   | catillus | [6630] | 04-SRNP-23173 | 669 | [0n]bp |
| Chioides   | catillus | [6631] | 04-SRNP-24064 | 669 | [0n]bp |
| Chioides   | catillus | [6632] | 03-SRNP-1704  | 654 | [0n]bp |
| Chioides   | catillus | [6633] | 04-SRNP-23511 | 669 | [4n]bp |
| Chioides   | catillus | [6634] | 03-SRNP-1498  | 642 | [0n]bp |
| Chioides   | catillus | [6635] | 05-SRNP-31764 | 576 | [1n]bp |
| Chioides   | catillus | [6636] | 07-SRNP-58581 | 645 | [0n]bp |
| Chioides   | zilpa    | [6637] | 02-SRNP-10079 | 645 | [0n]bp |
| Chioides   | zilpa    | [6638] | 07-SRNP-45681 | 669 | [0n]bp |
| Chioides   | zilpa    | [6639] | 04-SRNP-45690 | 669 | [0n]bp |
| Chioides   | zilpa    | [6640] | 04-SRNP-45597 | 669 | [0n]bp |
| Chioides   | zilpa    | [6641] | 04-SRNP-45616 | 669 | [0n]bp |
| Chioides   | zilpa    | [6642] | 04-SRNP-45596 | 669 | [0n]bp |
| Chioides   | zilpa    | [6643] | 04-SRNP-45594 | 669 | [0n]bp |
| Chioides   | zilpa    | [6644] | 04-SRNP-45618 | 669 | [0n]bp |
| Chioides   | zilpa    | [6645] | 04-SRNP-45595 | 669 | [0n]bp |
| Chioides   | zilpa    | [6646] | 04-SRNP-45749 | 669 | [0n]bp |
| Chioides   | zilpa    | [6647] | 02-SRNP-10078 | 654 | [0n]bp |
| Chioides   | zilpa    | [6648] | 07-SRNP-45680 | 660 | [0n]bp |
| Chioides   | zilpa    | [6649] | 07-SRNP-45864 | 669 | [0n]bp |
| Chioides   | zilpa    | [6650] | 09-SRNP-57613 | 669 | [0n]bp |
| Epargyreus | Burns04  | [6651] | 02-SRNP-29831 | 639 | [0n]bp |
| Epargyreus | Burns04  | [6652] | 02-SRNP-29832 | 639 | [0n]bp |
| Epargyreus | Burns04  | [6653] | 01-SRNP-14765 | 639 | [0n]bp |
| Epargyreus | Burns04  | [6654] | 03-SRNP-30086 | 669 | [0n]bp |
| Epargyreus | Burns04  | [6655] | 03-SRNP-29910 | 669 | [0n]bp |
| Epargyreus | Burns04  | [6656] | 03-SRNP-29907 | 669 | [0n]bp |
| Epargyreus | Burns04  | [6657] | 01-SRNP-17907 | 669 | [0n]bp |
| Epargyreus | Burns05  | [6658] | 02-SRNP-4752  | 669 | [0n]bp |
| Epargyreus | Burns04  | [6659] | 03-SRNP-29911 | 669 | [0n]bp |
| Epargyreus | Burns04  | [6660] | 07-SRNP-45120 | 669 | [0n]bp |
| Epargyreus | Burns04  | [6661] | 02-SRNP-16314 | 630 | [1n]bp |
| Epargyreus | Burns04  | [6662] | 04-SRNP-24319 | 669 | [0n]bp |
| Epargyreus | Burns04  | [6663] | 96-SRNP-9218  | 405 | [0n]bp |
| Epargyreus | Burns04  | [6664] | 01-SRNP-16938 | 504 | [0n]bp |
| Epargyreus | Burns04  | [6665] | 07-SRNP-20185 | 669 | [0n]bp |
| Epargyreus | Burns04  | [6666] | 07-SRNP-20050 | 645 | [0n]bp |
| Epargyreus | Burns04  | [6667] | 07-SRNP-20051 | 630 | [0n]bp |
| Epargyreus | Burns07  | [6668] | 07-SRNP-21582 | 612 | [0n]bp |
| Epargyreus | Burns07  | [6669] | 07-SRNP-21586 | 627 | [0n]bp |
| Epargyreus | Burns07  | [6670] | 04-SRNP-55660 | 669 | [0n]bp |
| Epargyreus | Burns07  | [6671] | 05-SRNP-30037 | 645 | [0n]bp |
| Epargyreus | Burns07  | [6672] | 05-SRNP-21988 | 648 | [1n]bp |
| Epargyreus | Burns07  | [6673] | 04-SRNP-15059 | 669 | [0n]bp |
| Epargyreus | Burns07  | [6674] | 04-SRNP-1184  | 669 | [0n]bp |
| Epargyreus | Burns07  | [6675] | 02-SRNP-16668 | 639 | [0n]bp |
| Epargyreus | Burns07  | [6676] | 02-SRNP-16077 | 657 | [0n]bp |
| Epargyreus | Burns07  | [6677] | 06-SRNP-32932 | 609 | [0n]bp |
| Epargyreus | Burns07  | [6678] | 07-SRNP-21670 | 669 | [0n]bp |
| Epargyreus | Burns07  | [6679] | 08-SRNP-2670  | 669 | [0n]bp |
| Epargyreus | Burns07  | [6680] | 08-SRNP-31981 | 669 | [0n]bp |
| Epargyreus | Burns05  | [6681] | 06-SRNP-46832 | 669 | [0n]bp |
| Epargyreus | Burns05  | [6682] | 06-SRNP-46827 | 669 | [0n]bp |
| Epargyreus | Burns05  | [6683] | 02-SRNP-29177 | 669 | [0n]bp |
| Epargyreus | Burns05  | [6684] | 02-SRNP-29170 | 669 | [0n]bp |
| Epargyreus | Burns05  | [6685] | 02-SRNP-29171 | 669 | [0n]bp |
| Epargyreus | Burns05  | [6686] | 02-SRNP-4753  | 669 | [0n]bp |
| Epargyreus | Burns05  | [6687] | 02-SRNP-5328  | 657 | [0n]bp |
| Epargyreus | Burns05  | [6688] | 02-SRNP-17323 | 651 | [0n]bp |
| Epargyreus | Burns05  | [6689] | 02-SRNP-4118  | 480 | [0n]bp |
| Epargyreus | Burns05  | [6690] | 02-SRNP-15163 | 501 | [1n]bp |
| Epargyreus | Burns05  | [6691] | 07-SRNP-56896 | 633 | [0n]bp |
| Epargyreus | Burns05  | [6692] | 07-SRNP-46910 | 669 | [0n]bp |
| Epargyreus | Burns05  | [6693] | 05-SRNP-65949 | 645 | [0n]bp |
| Epargyreus | Burns05  | [6694] | 02-SRNP-28000 | 639 | [0n]bp |
| Epargyreus | Burns05  | [6695] | 02-SRNP-4513  | 480 | [0n]bp |
| Epargyreus | Burns05  | [6696] | 04-SRNP-14225 | 669 | [0n]bp |

```

|Epargyreus Burns05|[6694]|02-SRNP-28000|639[0n]bp
|Epargyreus Burns05|[6695]|02-SRNP-4513|480[0n]bp
|Epargyreus Burns05|[6696]|04-SRNP-14225|669[0n]bp
|Epargyreus Burns05|[6697]|02-SRNP-29175|669[0n]bp
|Epargyreus Burns05|[6698]|08-SRNP-15158|669[0n]bp
|Epargyreus Burns06|[6699]|97-SRNP-1659|561[0n]bp
|Epargyreus Burns06|[6700]|02-SRNP-8179|618[0n]bp
|Epargyreus Burns06|[6701]|03-SRNP-20073|669[0n]bp
|Epargyreus Burns06|[6702]|07-SRNP-1276|669[0n]bp
|Epargyreus Burns06|[6703]|07-SRNP-427|669[0n]bp
|Epargyreus Burns06|[6704]|08-SRNP-1110|669[0n]bp
|Epargyreus Burns11|[6705]|01-SRNP-16427|621[0n]bp
|Epargyreus Burns11|[6706]|07-SRNP-20344|669[0n]bp
|Epargyreus Burns11|[6707]|07-SRNP-20063|669[0n]bp
|Epargyreus Burns11|[6708]|04-SRNP-14219|609[0n]bp
|Epargyreus Burns11|[6709]|07-SRNP-20341|621[0n]bp
|Epargyreus Burns11|[6710]|07-SRNP-23521|621[0n]bp
|Epargyreus Burns11|[6711]|05-SRNP-45151|669[0n]bp
|Epargyreus Burns11|[6712]|07-SRNP-20334|669[0n]bp
|Epargyreus Burns11|[6713]|05-SRNP-45152|669[1n]bp
|Epargyreus Burns11|[6714]|07-SRNP-20333|603[0n]bp
|Epargyreus Burns11|[6715]|06-SRNP-67531|606[0n]bp
|Epargyreus Burns11|[6716]|04-SRNP-21554|606[0n]bp
|Epargyreus Burns11|[6717]|01-SRNP-16541|384[0n]bp
|Epargyreus Burns11|[6718]|06-SRNP-58925|591[0n]bp
|Epargyreus Burns11|[6719]|07-SRNP-20296|606[0n]bp
|Epargyreus Burns11|[6720]|07-SRNP-20364|606[0n]bp
|Epargyreus Burns11|[6721]|07-SRNP-20329|669[0n]bp
|Epargyreus Burns11|[6722]|09-SRNP-55106|669[0n]bp
|Epargyreus Burns12|[6723]|08-SRNP-24800|627[0n]bp
|Epargyreus Burns12|[6724]|07-SRNP-46132|660[2n]bp
|Epargyreus Burns12|[6725]|07-SRNP-21329|495[0n]bp
|Epargyreus Burns12|[6726]|07-SRNP-65538|669[0n]bp
|Epargyreus Burns12|[6727]|08-SRNP-24801|669[0n]bp
|Epargyreus Burns03|[6728]|08-SRNP-45027|669[0n]bp
|Epargyreus Burns03|[6729]|07-SRNP-57869|645[0n]bp
|Epargyreus Burns03|[6730]|94-SRNP-8731|540[0n]bp
|Epargyreus Burns03|[6731]|04-SRNP-45025|669[0n]bp
|Epargyreus Burns03|[6732]|04-SRNP-47759|630[0n]bp
|Epargyreus Burns03|[6733]|07-SRNP-57031|669[0n]bp
|Epargyreus Burns03|[6734]|05-SRNP-45698|669[0n]bp
|Epargyreus Burns03|[6735]|06-SRNP-47189|669[0n]bp
|Epargyreus Burns03|[6736]|04-SRNP-46436|669[0n]bp
|Epargyreus Burns03|[6737]|04-SRNP-46435|669[0n]bp
|Epargyreus Burns03|[6738]|04-SRNP-46800|669[0n]bp
|Epargyreus Burns03|[6739]|04-SRNP-46437|669[0n]bp
|Epargyreus Burns03|[6740]|04-SRNP-46819|669[0n]bp
|Epargyreus Burns03|[6741]|04-SRNP-48332|669[0n]bp
|Epargyreus Burns03|[6742]|04-SRNP-47032|669[0n]bp
|Epargyreus Burns03|[6743]|04-SRNP-47031|669[0n]bp
|Epargyreus Burns03|[6744]|04-SRNP-46799|669[0n]bp
|Epargyreus Burns03|[6745]|04-SRNP-46820|669[0n]bp
|Epargyreus Burns03|[6746]|94-SRNP-8741|384[0n]bp
|Epargyreus Burns03|[6747]|96-SRNP-10052|384[0n]bp
|Epargyreus Burns03|[6748]|04-SRNP-48150|669[0n]bp
|Epargyreus Burns03|[6749]|08-SRNP-58522|669[2n]bp
|Epargyreus Burns02|[6750]|01-SRNP-3183|639[0n]bp
|Epargyreus Burns02|[6751]|02-SRNP-29202|639[0n]bp
|Epargyreus Burns02|[6752]|05-SRNP-30057|645[0n]bp
|Epargyreus Burns02|[6753]|04-SRNP-27300|669[0n]bp
|Epargyreus Burns02|[6754]|07-SRNP-61270|669[0n]bp
|Epargyreus Burns02|[6755]|08-SRNP-4758|669[0n]bp
|Epargyreus Burns02|[6756]|09-SRNP-71932|669[0n]bp
|Epargyreus Burns02|[6757]|01-SRNP-18804|639[0n]bp
|Epargyreus Burns02|[6758]|01-SRNP-18806|651[0n]bp
|Epargyreus Burns02|[6759]|02-SRNP-15408|639[1n]bp
|Epargyreus Burns02|[6760]|08-SRNP-72029|669[0n]bp
|Epargyreus Burns02|[6761]|04-SRNP-15015|669[0n]bp
|Epargyreus Burns02|[6762]|07-SRNP-57672|645[0n]bp
|Epargyreus Burns02|[6763]|04-SRNP-15177|669[0n]bp
|Epargyreus Burns02|[6764]|05-SRNP-33218|645[0n]bp
|Epargyreus Burns02|[6765]|07-SRNP-42506|642[0n]bp
|Epargyreus Burns02|[6766]|02-SRNP-524|639[0n]bp
|Epargyreus Burns02|[6767]|02-SRNP-525|642[0n]bp
|Epargyreus Burns02|[6768]|04-SRNP-24265|669[0n]bp
|Epargyreus Burns02|[6769]|92-SRNP-2367|615[1n]bp
|Epargyreus Burns02|[6770]|05-SRNP-2701|639[0n]bp
|Epargyreus Burns02|[6771]|04-SRNP-13417|669[0n]bp
|Epargyreus Burns02|[6772]|04-SRNP-24405|669[0n]bp
|Epargyreus Burns02|[6773]|02-SRNP-29200|657[0n]bp
|Epargyreus Burns02|[6774]|02-SRNP-32945|663[0n]bp
|Epargyreus Burns02|[6775]|04-SRNP-14174|669[0n]bp
|Epargyreus Burns02|[6776]|04-SRNP-15077|669[0n]bp
|Epargyreus Burns02|[6777]|04-SRNP-15090|669[0n]bp
|Epargyreus Burns02|[6778]|04-SRNP-15384|669[0n]bp
|Epargyreus Burns02|[6779]|04-SRNP-4655|669[0n]bp
|Epargyreus Burns02|[6780]|04-SRNP-15720|669[0n]bp
|Epargyreus Burns02|[6781]|06-SRNP-43439|669[0n]bp
|Epargyreus Burns02|[6782]|06-SRNP-43442|669[0n]bp
|Epargyreus Burns02|[6783]|06-SRNP-43440|669[0n]bp
|Epargyreus Burns02|[6784]|05-SRNP-32694|669[0n]bp
|Epargyreus Burns02|[6785]|05-SRNP-1416|669[0n]bp
|Epargyreus Burns02|[6786]|04-SRNP-27299|669[0n]bp
|Epargyreus Burns02|[6787]|05-SRNP-92|669[0n]bp
|Epargyreus Burns02|[6788]|08-SRNP-4814|669[0n]bp
|Epargyreus Burns02|[6789]|08-SRNP-4777|669[0n]bp
|Epargyreus Burns02|[6790]|09-SRNP-72516|669[0n]bp
|Epargyreus Burns02|[6791]|09-SRNP-73319|669[0n]bp
|Epargyreus Burns02|[6792]|09-SRNP-76379|669[0n]bp
|Epargyreus Burns02|[6793]|09-SRNP-75608|669[0n]bp
|Codatractus imalena|[6794]|00-SRNP-10752|594[8n]bp
|Codatractus imalena|[6795]|97-SRNP-1645|606[6n]bp
|Codatractus imalena|[6796]|02-SRNP-24526|315[1n]bp

```

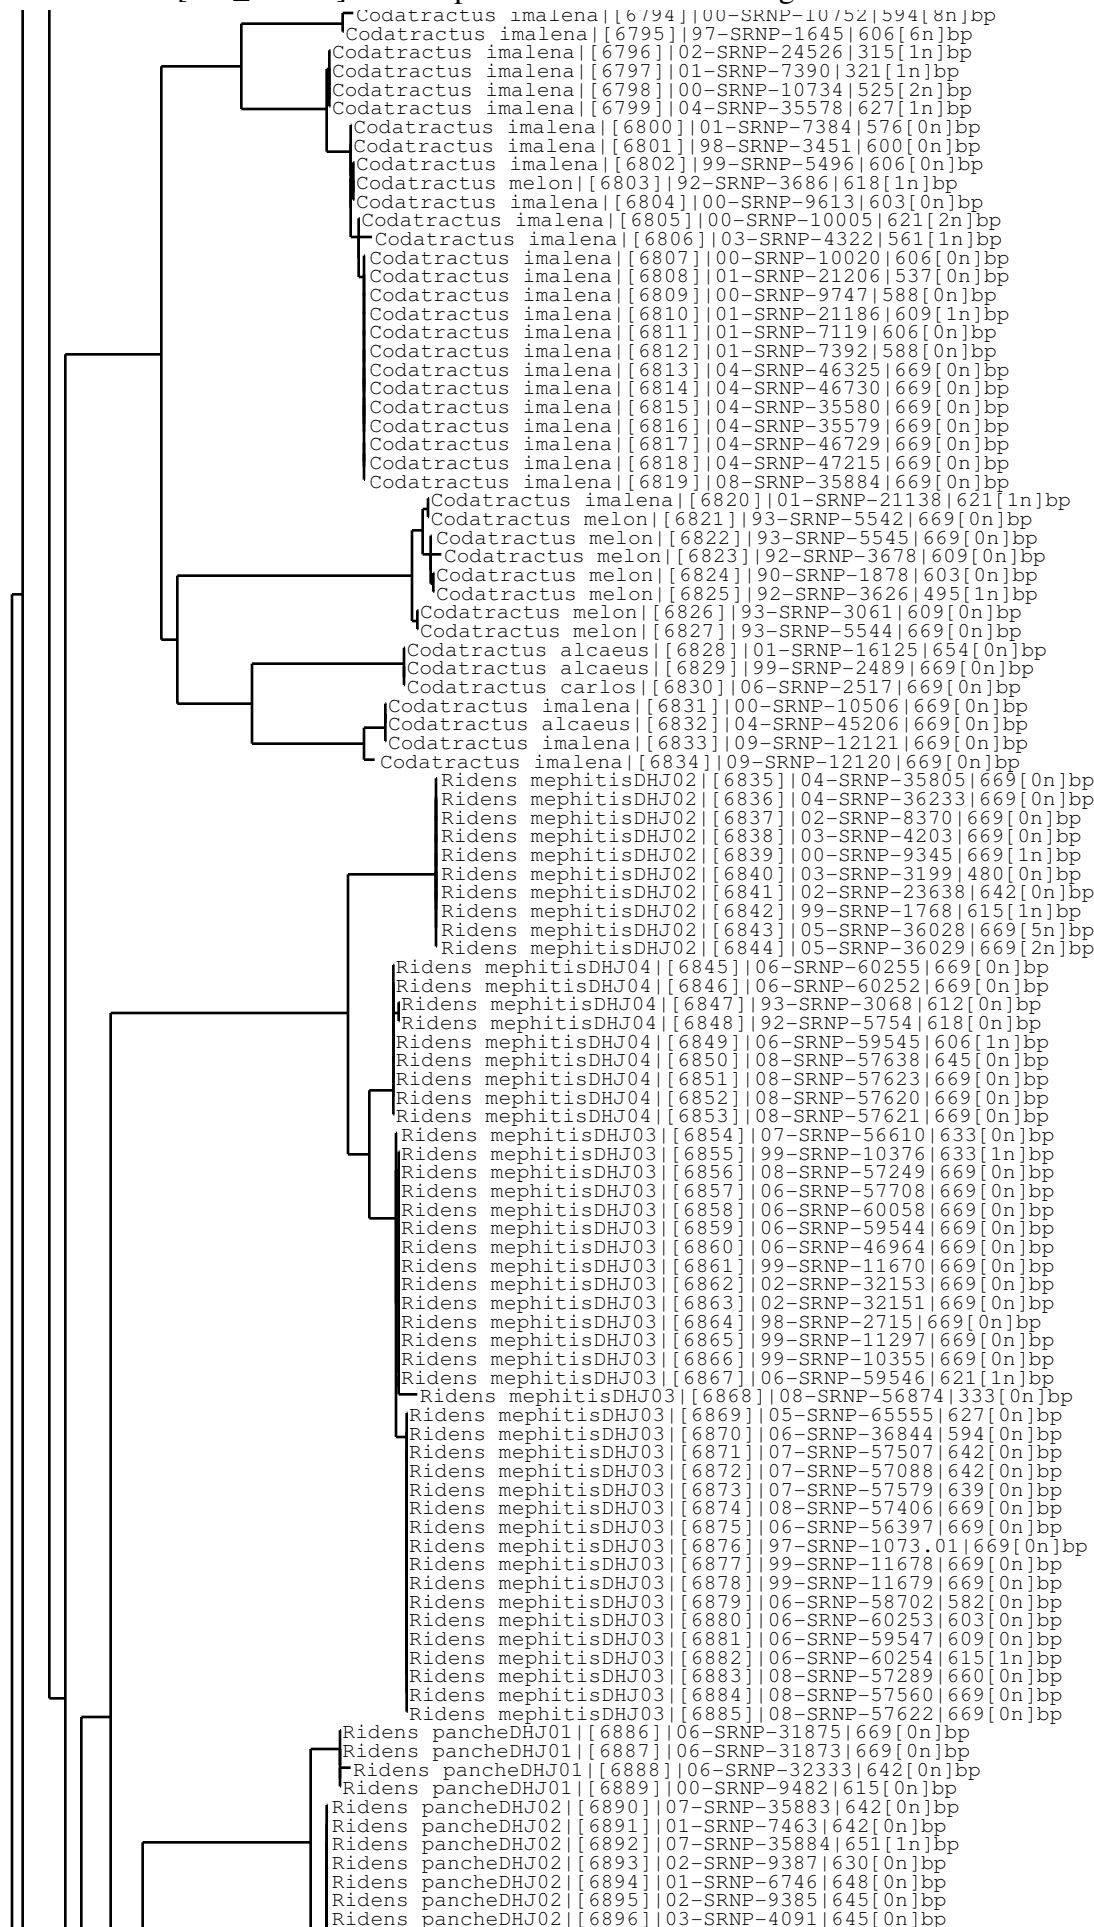

|                    |        |               |     |        |
|--------------------|--------|---------------|-----|--------|
| Ridens pancheDHJ02 | [6894] | 01-SRNP-6746  | 648 | [On]bp |
| Ridens pancheDHJ02 | [6895] | 02-SRNP-9385  | 645 | [On]bp |
| Ridens pancheDHJ02 | [6896] | 03-SRNP-4091  | 645 | [On]bp |
| Ridens pancheDHJ02 | [6897] | 02-SRNP-8372  | 645 | [On]bp |
| Ridens pancheDHJ02 | [6898] | 01-SRNP-6929  | 669 | [On]bp |
| Ridens pancheDHJ02 | [6899] | 02-SRNP-8538  | 669 | [On]bp |
| Ridens pancheDHJ02 | [6900] | 06-SRNP-3632  | 669 | [On]bp |
| Ridens pancheDHJ02 | [6901] | 06-SRNP-35129 | 669 | [On]bp |
| Ridens pancheDHJ02 | [6902] | 05-SRNP-35185 | 669 | [On]bp |
| Ridens pancheDHJ02 | [6903] | 05-SRNP-35180 | 669 | [On]bp |
| Ridens pancheDHJ02 | [6904] | 04-SRNP-35425 | 669 | [On]bp |
| Ridens pancheDHJ02 | [6905] | 05-SRNP-31719 | 669 | [On]bp |
| Ridens pancheDHJ02 | [6906] | 04-SRNP-35446 | 669 | [On]bp |
| Ridens pancheDHJ02 | [6907] | 04-SRNP-35428 | 669 | [On]bp |
| Ridens pancheDHJ02 | [6908] | 03-SRNP-6073  | 666 | [On]bp |
| Ridens pancheDHJ02 | [6909] | 06-SRNP-3638  | 618 | [On]bp |
| Ridens pancheDHJ02 | [6910] | 06-SRNP-3482  | 648 | [On]bp |
| Ridens pancheDHJ02 | [6911] | 03-SRNP-3775  | 591 | [3n]bp |
| Ridens pancheDHJ02 | [6912] | 01-SRNP-6839  | 624 | [On]bp |
| Ridens pancheDHJ02 | [6913] | 02-SRNP-9450  | 654 | [On]bp |
| Ridens pancheDHJ02 | [6914] | 02-SRNP-8537  | 618 | [On]bp |
| Ridens pancheDHJ02 | [6915] | 03-SRNP-3740  | 609 | [On]bp |
| Ridens pancheDHJ02 | [6916] | 03-SRNP-4014  | 612 | [On]bp |
| Ridens pancheDHJ02 | [6917] | 01-SRNP-9377  | 666 | [On]bp |
| Ridens pancheDHJ02 | [6918] | 01-SRNP-6552  | 666 | [On]bp |
| Ridens pancheDHJ02 | [6919] | 00-SRNP-10808 | 669 | [On]bp |
| Ridens pancheDHJ02 | [6920] | 00-SRNP-10799 | 669 | [On]bp |
| Ridens pancheDHJ02 | [6921] | 03-SRNP-3772  | 669 | [On]bp |
| Ridens pancheDHJ02 | [6922] | 03-SRNP-3769  | 669 | [On]bp |
| Ridens pancheDHJ02 | [6923] | 98-SRNP-2005  | 669 | [On]bp |
| Ridens pancheDHJ02 | [6924] | 03-SRNP-4067  | 669 | [On]bp |
| Ridens pancheDHJ02 | [6925] | 03-SRNP-3596  | 669 | [On]bp |
| Ridens pancheDHJ02 | [6926] | 03-SRNP-4312  | 669 | [On]bp |
| Ridens pancheDHJ02 | [6927] | 03-SRNP-3808  | 669 | [On]bp |
| Ridens pancheDHJ02 | [6928] | 02-SRNP-8369  | 669 | [On]bp |
| Ridens pancheDHJ02 | [6929] | 02-SRNP-8368  | 669 | [On]bp |
| Ridens pancheDHJ02 | [6930] | 03-SRNP-3774  | 669 | [On]bp |
| Ridens pancheDHJ02 | [6931] | 03-SRNP-3634  | 669 | [On]bp |
| Ridens pancheDHJ02 | [6932] | 99-SRNP-453   | 669 | [On]bp |
| Ridens pancheDHJ02 | [6933] | 06-SRNP-3634  | 669 | [On]bp |
| Ridens pancheDHJ02 | [6934] | 07-SRNP-35521 | 669 | [On]bp |
| Ridens pancheDHJ02 | [6935] | 08-SRNP-35179 | 669 | [On]bp |
| Ridens pancheDHJ02 | [6936] | 08-SRNP-35569 | 669 | [On]bp |
| Ridens pancheDHJ02 | [6937] | 03-SRNP-23955 | 669 | [On]bp |
| Ridens pancheDHJ02 | [6938] | 03-SRNP-3637  | 669 | [On]bp |
| Ridens pancheDHJ02 | [6939] | 08-SRNP-35487 | 669 | [On]bp |
| Ridens pancheDHJ02 | [6940] | 08-SRNP-35331 | 639 | [On]bp |
| Ridens Burns01     | [6941] | 06-SRNP-31900 | 642 | [On]bp |
| Ridens Burns01     | [6942] | 05-SRNP-30993 | 636 | [On]bp |
| Ridens Burns01     | [6943] | 05-SRNP-30994 | 633 | [1n]bp |
| Ridens Burns01     | [6944] | 05-SRNP-30995 | 633 | [1n]bp |
| Ridens Burns01     | [6945] | 02-SRNP-28461 | 630 | [On]bp |
| Ridens Burns01     | [6946] | 05-SRNP-31102 | 687 | [On]bp |
| Ridens Burns01     | [6947] | 02-SRNP-28462 | 576 | [On]bp |
| Ridens Burns01     | [6948] | 05-SRNP-31099 | 669 | [On]bp |
| Ridens Burns01     | [6949] | 06-SRNP-31896 | 669 | [On]bp |
| Ridens Burns01     | [6950] | 06-SRNP-7320  | 669 | [On]bp |
| Ridens Burns01     | [6951] | 06-SRNP-31898 | 669 | [On]bp |
| Ridens Burns01     | [6952] | 06-SRNP-31899 | 669 | [On]bp |
| Ridens Burns01     | [6953] | 06-SRNP-31901 | 669 | [On]bp |
| Ridens biolleyi    | [6954] | 09-SRNP-35558 | 663 | [On]bp |
| Ridens biolleyi    | [6955] | 02-SRNP-8021  | 624 | [On]bp |
| Ridens biolleyi    | [6956] | 01-SRNP-6396  | 591 | [On]bp |
| Ridens biolleyi    | [6957] | 98-SRNP-2547  | 594 | [On]bp |
| Ridens biolleyi    | [6958] | 00-SRNP-9333  | 594 | [On]bp |
| Ridens biolleyi    | [6959] | 00-SRNP-9370  | 594 | [On]bp |
| Ridens biolleyi    | [6960] | 00-SRNP-9238  | 591 | [On]bp |
| Ridens biolleyi    | [6961] | 00-SRNP-9259  | 378 | [On]bp |
| Ridens biolleyi    | [6962] | 02-SRNP-8016  | 396 | [On]bp |
| Ridens biolleyi    | [6963] | 00-SRNP-9229  | 384 | [On]bp |
| Ridens biolleyi    | [6964] | 01-SRNP-6395  | 384 | [On]bp |
| Ridens biolleyi    | [6965] | 99-SRNP-17191 | 558 | [On]bp |
| Ridens biolleyi    | [6966] | 08-SRNP-31106 | 669 | [On]bp |
| Ridens biolleyi    | [6967] | 09-SRNP-36067 | 669 | [On]bp |
| Ridens biolleyi    | [6968] | 09-SRNP-36267 | 669 | [On]bp |
| Ridens cachinnans  | [6969] | 08-SRNP-37306 | 669 | [On]bp |
| Ridens cachinnans  | [6970] | 02-SRNP-23213 | 612 | [On]bp |
| Ridens cachinnans  | [6971] | 02-SRNP-23212 | 612 | [On]bp |
| Ridens cachinnans  | [6972] | 08-SRNP-35997 | 576 | [On]bp |
| Ridens cachinnans  | [6973] | 08-SRNP-35556 | 576 | [On]bp |
| Ridens cachinnans  | [6974] | 09-SRNP-36708 | 669 | [On]bp |
| Venada nevada      | [6975] | 05-SRNP-35056 | 666 | [On]bp |
| Venada nevada      | [6976] | 07-SRNP-35995 | 645 | [On]bp |
| Venada nevada      | [6977] | 06-SRNP-36696 | 645 | [On]bp |
| Venada nevada      | [6978] | 03-SRNP-3106  | 645 | [On]bp |
| Venada nevada      | [6979] | 03-SRNP-4419  | 645 | [On]bp |
| Venada nevada      | [6980] | 03-SRNP-4070  | 645 | [On]bp |
| Venada nevada      | [6981] | 03-SRNP-3148  | 645 | [On]bp |
| Venada nevada      | [6982] | 03-SRNP-3972  | 645 | [1n]bp |
| Venada nevada      | [6983] | 00-SRNP-9986  | 642 | [On]bp |
| Venada nevada      | [6984] | 05-SRNP-227   | 669 | [On]bp |
| Venada nevada      | [6985] | 05-SRNP-30877 | 669 | [On]bp |
| Venada nevada      | [6986] | 05-SRNP-226   | 669 | [On]bp |
| Venada nevada      | [6987] | 05-SRNP-577   | 669 | [On]bp |
| Venada nevada      | [6988] | 05-SRNP-35565 | 669 | [On]bp |
| Venada nevada      | [6989] | 05-SRNP-35356 | 669 | [On]bp |
| Venada nevada      | [6990] | 04-SRNP-35614 | 669 | [On]bp |
| Venada nevada      | [6991] | 04-SRNP-35681 | 669 | [On]bp |
| Venada nevada      | [6992] | 04-SRNP-56616 | 669 | [On]bp |
| Venada nevada      | [6993] | 04-SRNP-56617 | 669 | [On]bp |
| Venada nevada      | [6994] | 04-SRNP-61462 | 648 | [On]bp |
| Venada nevada      | [6995] | 06-SRNP-36333 | 654 | [On]bp |
| Venada nevada      | [6996] | 06-SRNP-36619 | 648 | [On]bp |

```

Venada nevada| [6994]|04-SRNP-61462|648|Un]bp
Venada nevada| [6995]|06-SRNP-36333|654|0n]bp
Venada nevada| [6996]|06-SRNP-36619|648|0n]bp
Venada nevada| [6997]|98-SRNP-2758|630|0n]bp
Venada nevada| [6998]|03-SRNP-3990|492|1n]bp
Venada nevada| [6999]|03-SRNP-4768|492|0n]bp
Venada nevada| [7000]|03-SRNP-3346|636|1n]bp
Venada nevada| [7001]|05-SRNP-35244|651|0n]bp
Venada nevada| [7002]|05-SRNP-30878|669|0n]bp
Venada nevada| [7003]|05-SRNP-30663|669|0n]bp
Venada nevada| [7004]|05-SRNP-30665|669|0n]bp
Venada nevada| [7005]|07-SRNP-36157|669|0n]bp
Venada nevada| [7006]|07-SRNP-36499|669|0n]bp
Venada nevada| [7007]|07-SRNP-35918|669|0n]bp
Venada nevada| [7008]|07-SRNP-35840|669|0n]bp
Venada nevada| [7009]|07-SRNP-35841|669|0n]bp
Venada nevada| [7010]|08-SRNP-35509|669|0n]bp
Venada nevada| [7011]|08-SRNP-35511|669|0n]bp
Venada nevada| [7012]|08-SRNP-35510|669|0n]bp
Venada nevada| [7013]|08-SRNP-35612|642|0n]bp
Venada daneva| [7014]|06-SRNP-4962|669|0n]bp
Venada daneva| [7015]|03-SRNP-5810|645|0n]bp
Venada daneva| [7016]|02-SRNP-20143|645|0n]bp
Venada daneva| [7017]|03-SRNP-6535|657|0n]bp
Venada daneva| [7018]|99-SRNP-18830|594|0n]bp
Venada daneva| [7019]|03-SRNP-5862|492|0n]bp
Venada daneva| [7020]|97-SRNP-11560|396|0n]bp
Venada daneva| [7021]|03-SRNP-5863|576|0n]bp
Venada daneva| [7022]|03-SRNP-5651|576|0n]bp
Venada daneva| [7023]|04-SRNP-32605|669|0n]bp
Venada daneva| [7024]|04-SRNP-2360|669|0n]bp
Venada daneva| [7025]|04-SRNP-2359|669|0n]bp
Venada daneva| [7026]|04-SRNP-2191|669|0n]bp
Venada daneva| [7027]|04-SRNP-2688|669|0n]bp
Venada daneva| [7028]|05-SRNP-2577|669|0n]bp
Venada daneva| [7029]|07-SRNP-2501|669|0n]bp
Venada daneva| [7030]|07-SRNP-2502|669|0n]bp
Venada daneva| [7031]|07-SRNP-2371|669|0n]bp
Venada daneva| [7032]|08-SRNP-2594|669|0n]bp
Venada daneva| [7033]|08-SRNP-2680|669|0n]bp
Venada daneva| [7034]|08-SRNP-2705|669|0n]bp
Venada daneva| [7035]|08-SRNP-31224|669|0n]bp
Venada daneva| [7036]|09-SRNP-32294|669|0n]bp
Venada naranja| [7037]|00-SRNP-9226|669|0n]bp
Venada naranja| [7038]|01-SRNP-6992|669|0n]bp
Venada naranja| [7039]|02-SRNP-8086|669|0n]bp
Venada naranja| [7040]|03-SRNP-22199|669|0n]bp
Venada naranja| [7041]|00-SRNP-9327|669|0n]bp
Venada naranja| [7042]|00-SRNP-9252|669|0n]bp
Venada naranja| [7043]|00-SRNP-9183|669|0n]bp
Venada naranja| [7044]|00-SRNP-9324|669|0n]bp
Venada naranja| [7045]|99-SRNP-1069|669|0n]bp
Venada naranja| [7046]|00-SRNP-9050|669|0n]bp
Venada naranja| [7047]|06-SRNP-35940|669|0n]bp
Venada naranja| [7048]|03-SRNP-4740|657|0n]bp
Venada naranja| [7049]|02-SRNP-24573|636|0n]bp
Venada naranja| [7050]|03-SRNP-3901|636|0n]bp
Venada naranja| [7051]|04-SRNP-35682|642|0n]bp
Venada naranja| [7052]|00-SRNP-9329|669|0n]bp
Venada naranja| [7053]|04-SRNP-36174|669|0n]bp
Venada naranja| [7054]|05-SRNP-35059|669|0n]bp
Venada naranja| [7055]|09-SRNP-35765|669|0n]bp
Venada Janzen01| [7056]|09-SRNP-36371|669|0n]bp
Venada Janzen01| [7057]|09-SRNP-36370|669|0n]bp
Venada cacao| [7058]|02-SRNP-23324|669|0n]bp
Venada cacao| [7059]|02-SRNP-23004|657|0n]bp
Venada cacao| [7060]|02-SRNP-23362|669|0n]bp
Venada cacao| [7061]|02-SRNP-23364|663|0n]bp
Venada cacao| [7062]|01-SRNP-6880|633|0n]bp
Venada cacaoDHJ02| [7063]|09-SRNP-36883|669|0n]bp
Polythrix kanshul| [7064]|04-SRNP-60560|669|0n]bp
Polythrix kanshul| [7065]|05-SRNP-5452|633|0n]bp
Polythrix kanshul| [7066]|09-SRNP-65100|669|0n]bp
Polythrix kanshul| [7067]|05-SRNP-2332|666|1n]bp
Polythrix kanshul| [7068]|00-SRNP-11396|555|0n]bp
Polythrix kanshul| [7069]|00-SRNP-373|576|0n]bp
Polythrix kanshul| [7070]|04-SRNP-60051|669|0n]bp
Polythrix kanshul| [7071]|06-SRNP-8907|669|0n]bp
Polythrix kanshul| [7072]|06-SRNP-9915|669|0n]bp
Polythrix kanshul| [7073]|07-SRNP-738|669|0n]bp
Polythrix kanshul| [7074]|07-SRNP-65895|669|0n]bp
Polythrix kanshul| [7075]|09-SRNP-42534|669|0n]bp
Porphyrogenes sula| [7076]|06-SRNP-42916|666|0n]bp
Ocyba calathana| [7077]|98-SRNP-6146|612|0n]bp
Ocyba calathana| [7078]|06-SRNP-55791|666|0n]bp
Ocyba calathana| [7079]|06-SRNP-55767|666|0n]bp
Ocyba calathana| [7080]|01-SRNP-12165|594|0n]bp
Ocyba calathana| [7081]|00-SRNP-2597|600|0n]bp
Ocyba calathana| [7082]|06-SRNP-12192|633|1n]bp
Ocyba calathana| [7083]|05-SRNP-64295|669|0n]bp
Ocyba calathana| [7084]|07-SRNP-65680|669|0n]bp
Ocyba calathana| [7085]|08-SRNP-12162|321|0n]bp
Porphyrogenes peterwegei| [7086]|06-SRNP-41790|603|0n]bp
Porphyrogenes peterwegei| [7087]|06-SRNP-59687|594|0n]bp
Porphyrogenes peterwegei| [7088]|08-SRNP-65472|669|0n]bp
Porphyrogenes peterwegei| [7089]|07-SRNP-45285|642|0n]bp
Porphyrogenes peterwegei| [7090]|05-SRNP-2308|642|0n]bp
Porphyrogenes peterwegei| [7091]|05-SRNP-4096|642|0n]bp
Porphyrogenes peterwegei| [7092]|02-SRNP-14654|627|0n]bp
Porphyrogenes peterwegei| [7093]|07-SRNP-65894|666|0n]bp
Porphyrogenes peterwegei| [7094]|06-SRNP-7825|666|0n]bp
Porphyrogenes peterwegei| [7095]|05-SRNP-25294|666|0n]bp
Porphyrogenes peterwegei| [7096]|06-SRNP-31563|666|0n]bp

```



|                          |        |               |     |      |    |
|--------------------------|--------|---------------|-----|------|----|
| Porphyrogenes peterwegei | [7094] | 06-SRNP-7825  | 666 | [0n] | bp |
| Porphyrogenes peterwegei | [7095] | 05-SRNP-25294 | 666 | [0n] | bp |
| Porphyrogenes peterwegei | [7096] | 06-SRNP-31563 | 666 | [0n] | bp |
| Porphyrogenes peterwegei | [7097] | 06-SRNP-32892 | 663 | [0n] | bp |
| Porphyrogenes peterwegei | [7098] | 03-SRNP-61331 | 657 | [0n] | bp |
| Porphyrogenes peterwegei | [7099] | 07-SRNP-23407 | 669 | [0n] | bp |
| Porphyrogenes peterwegei | [7100] | 06-SRNP-65685 | 669 | [0n] | bp |
| Porphyrogenes peterwegei | [7101] | 07-SRNP-31916 | 669 | [0n] | bp |
| Porphyrogenes peterwegei | [7102] | 07-SRNP-30450 | 669 | [0n] | bp |
| Porphyrogenes peterwegei | [7103] | 05-SRNP-19221 | 669 | [0n] | bp |
| Porphyrogenes peterwegei | [7104] | 05-SRNP-41224 | 669 | [0n] | bp |
| Porphyrogenes peterwegei | [7105] | 05-SRNP-20991 | 669 | [0n] | bp |
| Porphyrogenes peterwegei | [7106] | 05-SRNP-22389 | 669 | [0n] | bp |
| Porphyrogenes peterwegei | [7107] | 07-SRNP-40389 | 669 | [0n] | bp |
| Porphyrogenes peterwegei | [7108] | 06-SRNP-22070 | 669 | [0n] | bp |
| Porphyrogenes peterwegei | [7109] | 06-SRNP-22071 | 669 | [0n] | bp |
| Porphyrogenes peterwegei | [7110] | 06-SRNP-22084 | 669 | [0n] | bp |
| Porphyrogenes peterwegei | [7111] | 06-SRNP-33708 | 669 | [0n] | bp |
| Porphyrogenes peterwegei | [7112] | 06-SRNP-43467 | 669 | [0n] | bp |
| Porphyrogenes peterwegei | [7113] | 05-SRNP-19251 | 669 | [0n] | bp |
| Porphyrogenes peterwegei | [7114] | 06-SRNP-45298 | 669 | [0n] | bp |
| Porphyrogenes peterwegei | [7115] | 06-SRNP-45299 | 669 | [0n] | bp |
| Porphyrogenes peterwegei | [7116] | 06-SRNP-31354 | 669 | [0n] | bp |
| Porphyrogenes peterwegei | [7117] | 05-SRNP-43764 | 669 | [0n] | bp |
| Porphyrogenes peterwegei | [7118] | 04-SRNP-42341 | 669 | [0n] | bp |
| Porphyrogenes peterwegei | [7119] | 04-SRNP-24187 | 669 | [0n] | bp |
| Porphyrogenes peterwegei | [7120] | 04-SRNP-44001 | 669 | [0n] | bp |
| Porphyrogenes peterwegei | [7121] | 04-SRNP-45221 | 669 | [0n] | bp |
| Porphyrogenes peterwegei | [7122] | 05-SRNP-43653 | 669 | [0n] | bp |
| Porphyrogenes peterwegei | [7123] | 06-SRNP-22153 | 669 | [0n] | bp |
| Porphyrogenes peterwegei | [7124] | 03-SRNP-21521 | 576 | [1n] | bp |
| Porphyrogenes peterwegei | [7125] | 05-SRNP-45183 | 660 | [0n] | bp |
| Porphyrogenes peterwegei | [7126] | 07-SRNP-41033 | 660 | [0n] | bp |
| Porphyrogenes peterwegei | [7127] | 07-SRNP-27671 | 666 | [0n] | bp |
| Porphyrogenes peterwegei | [7128] | 04-SRNP-22615 | 669 | [0n] | bp |
| Porphyrogenes peterwegei | [7129] | 07-SRNP-42518 | 669 | [0n] | bp |
| Porphyrogenes peterwegei | [7130] | 08-SRNP-65165 | 669 | [0n] | bp |
| Porphyrogenes peterwegei | [7131] | 08-SRNP-55407 | 669 | [0n] | bp |
| Porphyrogenes peterwegei | [7132] | 08-SRNP-23691 | 669 | [0n] | bp |
| Porphyrogenes peterwegei | [7133] | 08-SRNP-65274 | 669 | [0n] | bp |
| Porphyrogenes peterwegei | [7134] | 08-SRNP-25491 | 669 | [0n] | bp |
| Porphyrogenes peterwegei | [7135] | 08-SRNP-25511 | 669 | [0n] | bp |
| Porphyrogenes peterwegei | [7136] | 08-SRNP-22811 | 669 | [0n] | bp |
| Porphyrogenes peterwegei | [7137] | 08-SRNP-25541 | 669 | [0n] | bp |
| Porphyrogenes peterwegei | [7138] | 08-SRNP-25501 | 669 | [0n] | bp |
| Porphyrogenes peterwegei | [7139] | 08-SRNP-65453 | 669 | [0n] | bp |
| Porphyrogenes peterwegei | [7140] | 08-SRNP-65190 | 669 | [0n] | bp |
| Porphyrogenes peterwegei | [7141] | 08-SRNP-50531 | 669 | [0n] | bp |
| Porphyrogenes peterwegei | [7142] | 08-SRNP-40151 | 669 | [0n] | bp |
| Porphyrogenes peterwegei | [7143] | 08-SRNP-65797 | 669 | [0n] | bp |
| Porphyrogenes peterwegei | [7144] | 08-SRNP-50511 | 669 | [0n] | bp |
| Porphyrogenes peterwegei | [7145] | 09-SRNP-70382 | 669 | [0n] | bp |
| Porphyrogenes peterwegei | [7146] | 09-SRNP-21376 | 669 | [0n] | bp |
| Porphyrogenes peterwegei | [7147] | 03-SRNP-20026 | 624 | [0n] | bp |
| Porphyrogenes peterwegei | [7148] | 03-SRNP-94031 | 627 | [0n] | bp |
| Porphyrogenes peterwegei | [7149] | 02-SRNP-65801 | 627 | [0n] | bp |
| Porphyrogenes peterwegei | [7150] | 05-SRNP-42535 | 666 | [0n] | bp |
| Porphyrogenes peterwegei | [7151] | 06-SRNP-32698 | 639 | [0n] | bp |
| Porphyrogenes peterwegei | [7152] | 06-SRNP-32697 | 630 | [0n] | bp |
| Porphyrogenes peterwegei | [7153] | 06-SRNP-22072 | 633 | [0n] | bp |
| Porphyrogenes peterwegei | [7154] | 03-SRNP-94051 | 627 | [0n] | bp |
| Porphyrogenes peterwegei | [7155] | 02-SRNP-21541 | 645 | [0n] | bp |
| Porphyrogenes peterwegei | [7156] | 06-SRNP-22118 | 669 | [0n] | bp |
| Porphyrogenes peterwegei | [7157] | 07-SRNP-9041  | 669 | [0n] | bp |
| Porphyrogenes peterwegei | [7158] | 05-SRNP-46602 | 669 | [0n] | bp |
| Porphyrogenes peterwegei | [7159] | 09-SRNP-26241 | 669 | [0n] | bp |
| Calliades zeutus         | [7160] | 05-SRNP-58434 | 687 | [0n] | bp |
| Calliades zeutus         | [7161] | 06-SRNP-19561 | 669 | [0n] | bp |
| Calliades zeutus         | [7162] | 07-SRNP-20366 | 669 | [0n] | bp |
| Calliades zeutus         | [7163] | 06-SRNP-58046 | 669 | [0n] | bp |
| Calliades zeutus         | [7164] | 04-SRNP-49938 | 669 | [0n] | bp |
| Calliades zeutus         | [7165] | 04-SRNP-14586 | 669 | [0n] | bp |
| Calliades zeutus         | [7166] | 04-SRNP-14067 | 627 | [0n] | bp |
| Calliades zeutus         | [7167] | 04-SRNP-49935 | 627 | [0n] | bp |
| Calliades zeutus         | [7168] | 04-SRNP-49393 | 627 | [0n] | bp |
| Calliades zeutus         | [7169] | 05-SRNP-61209 | 669 | [1n] | bp |
| Calliades zeutus         | [7170] | 06-SRNP-19539 | 669 | [0n] | bp |
| Calliades zeutus         | [7171] | 05-SRNP-55236 | 669 | [2n] | bp |
| Calliades zeutus         | [7172] | 02-SRNP-42941 | 639 | [0n] | bp |
| Calliades zeutus         | [7173] | 02-SRNP-41041 | 576 | [0n] | bp |
| Calliades zeutus         | [7174] | 07-SRNP-20861 | 636 | [0n] | bp |
| Calliades zeutus         | [7175] | 07-SRNP-21845 | 648 | [0n] | bp |
| Calliades zeutus         | [7176] | 07-SRNP-21844 | 669 | [0n] | bp |
| Proteides mercurius      | [7177] | 95-SRNP-64221 | 594 | [1n] | bp |
| Proteides mercurius      | [7178] | 05-SRNP-59505 | 669 | [1n] | bp |
| Proteides mercurius      | [7179] | 95-SRNP-42611 | 597 | [0n] | bp |
| Proteides mercurius      | [7180] | 95-SRNP-73191 | 615 | [0n] | bp |
| Proteides mercurius      | [7181] | 02-SRNP-45161 | 669 | [1n] | bp |
| Proteides mercurius      | [7182] | 95-SRNP-741   | 669 | [0n] | bp |
| Proteides mercurius      | [7183] | 00-SRNP-20231 | 669 | [1n] | bp |
| Proteides mercurius      | [7184] | 99-SRNP-60621 | 657 | [3n] | bp |
| Proteides mercurius      | [7185] | 95-SRNP-64131 | 588 | [4n] | bp |
| Proteides mercurius      | [7186] | 95-SRNP-78331 | 600 | [1n] | bp |
| Proteides mercurius      | [7187] | 04-SRNP-21331 | 627 | [1n] | bp |
| Proteides mercurius      | [7188] | 05-SRNP-19609 | 669 | [0n] | bp |
| Proteides mercurius      | [7189] | 04-SRNP-14109 | 669 | [0n] | bp |
| Proteides mercurius      | [7190] | 95-SRNP-63521 | 669 | [1n] | bp |
| Proteides mercurius      | [7191] | 95-SRNP-42691 | 609 | [1n] | bp |
| Proteides mercurius      | [7192] | 06-SRNP-55587 | 603 | [0n] | bp |
| Proteides mercurius      | [7193] | 95-SRNP-62651 | 627 | [0n] | bp |
| Proteides mercurius      | [7194] | 07-SRNP-40797 | 645 | [0n] | bp |
| Spathilepia clonius      | [7195] | 95-SRNP-92491 | 312 | [0n] | bp |
| Spathilepia clonius      | [7196] | 02-SRNP-57561 | 633 | [0n] | bp |

```

*Proteides mercurius|[194]|07-SRNP-4079|645[On]bp
Spathilepia clonius|[7195]|95-SRNP-9249|312[On]bp
Spathilepia clonius|[7196]|02-SRNP-5756|633[On]bp
Spathilepia clonius|[7197]|07-SRNP-20091|669[On]bp
Spathilepia clonius|[7198]|05-SRNP-20626|669[On]bp
Spathilepia clonius|[7199]|07-SRNP-20254|669[On]bp
Spathilepia clonius|[7200]|04-SRNP-47760|669[On]bp
Spathilepia clonius|[7201]|04-SRNP-27278|657[On]bp
Spathilepia clonius|[7202]|05-SRNP-46985|654[2n]bp
Spathilepia clonius|[7203]|07-SRNP-20183|669[1n]bp
Spathilepia clonius|[7204]|01-SRNP-15478|624[On]bp
Spathilepia clonius|[7205]|07-SRNP-20074|669[On]bp
Spathilepia clonius|[7206]|07-SRNP-20201|669[On]bp
Spathilepia clonius|[7207]|07-SRNP-20075|642[On]bp
Spathilepia clonius|[7208]|09-SRNP-76098|669[On]bp
Narcosius samson|[7209]|05-SRNP-32509|633[On]bp
Narcosius samson|[7210]|02-SRNP-3561|618[On]bp
Narcosius samson|[7211]|02-SRNP-18532|651[On]bp
Narcosius samson|[7212]|07-SRNP-45154|669[On]bp
Narcosius samson|[7213]|05-SRNP-21384|669[On]bp
Narcosius samson|[7214]|04-SRNP-23182|669[On]bp
Narcosius samson|[7215]|04-SRNP-46044|669[On]bp
Narcosius samson|[7216]|07-SRNP-2014|660[On]bp
Narcosius samson|[7217]|07-SRNP-33701|669[On]bp
Narcosius samson|[7218]|08-SRNP-30598|669[On]bp
Narcosius samson|[7219]|05-SRNP-22628|627[On]bp
Narcosius samson|[7220]|06-SRNP-6237|669[On]bp
Narcosius samson|[7221]|02-SRNP-373|651[On]bp
Narcosius samson|[7222]|07-SRNP-65943|669[On]bp
Narcosius samson|[7223]|07-SRNP-65845|669[On]bp
Narcosius samson|[7224]|08-SRNP-40054|669[On]bp
Narcosius samson|[7225]|07-SRNP-4271|669[On]bp
Narcosius samson|[7226]|07-SRNP-4275|669[On]bp
Narcosius samson|[7227]|07-SRNP-4276|669[On]bp
Narcosius samson|[7228]|08-SRNP-65210|669[On]bp
Narcosius samson|[7229]|07-SRNP-41022|669[On]bp
Narcosius samson|[7230]|07-SRNP-1456|669[On]bp
Narcosius samson|[7231]|07-SRNP-1341|669[On]bp
Narcosius samson|[7232]|06-SRNP-33348|669[On]bp
Narcosius samson|[7233]|04-SRNP-60936|669[On]bp
Narcosius samson|[7234]|07-SRNP-33230|669[1n]bp
Narcosius samson|[7235]|02-SRNP-1251|657[On]bp
Narcosius samson|[7236]|07-SRNP-4272|633[On]bp
Narcosius samson|[7237]|08-SRNP-1747|669[On]bp
Narcosius colossus|[7238]|07-SRNP-1788|633[On]bp
Narcosius colossus|[7239]|05-SRNP-3183|669[On]bp
Narcosius colossus|[7240]|05-SRNP-35254|669[On]bp
Narcosius colossus|[7241]|04-SRNP-34370|669[On]bp
Narcosius colossus|[7242]|05-SRNP-35044|669[On]bp
Narcosius colossus|[7243]|07-SRNP-60189|669[On]bp
Narcosius colossus|[7244]|07-SRNP-58794|669[On]bp
Narcosius colossus|[7245]|07-SRNP-1843|639[On]bp
Narcosius colossus|[7246]|03-SRNP-79|639[On]bp
Narcosius colossus|[7247]|06-SRNP-4365|669[On]bp
Narcosius colossus|[7248]|06-SRNP-35026|669[On]bp
Narcosius colossus|[7249]|06-SRNP-2399|669[On]bp
Narcosius colossus|[7250]|06-SRNP-12012|669[On]bp
Narcosius colossus|[7251]|04-SRNP-61447|669[On]bp
Narcosius colossus|[7252]|04-SRNP-35290|669[On]bp
Narcosius colossus|[7253]|04-SRNP-35050|669[On]bp
Narcosius colossus|[7254]|04-SRNP-35268|669[On]bp
Narcosius colossus|[7255]|04-SRNP-35266|669[On]bp
Narcosius colossus|[7256]|05-SRNP-35355|384[On]bp
Narcosius colossus|[7257]|06-SRNP-31983|468[1n]bp
Narcosius colossus|[7258]|02-SRNP-9121|651[On]bp
Narcosius colossus|[7259]|06-SRNP-36131|600[On]bp
Narcosius colossus|[7260]|07-SRNP-1842|669[On]bp
Narcosius colossus|[7261]|07-SRNP-60168|669[On]bp
Narcosius colossus|[7262]|08-SRNP-1953|669[On]bp
Narcosius colossus|[7263]|08-SRNP-2685|669[On]bp
Narcosius colossus|[7264]|08-SRNP-2684|669[On]bp
Narcosius colossus|[7265]|07-SRNP-57343|627[On]bp
Narcosius colossus|[7266]|07-SRNP-23367|609[On]bp
Narcosius colossus|[7267]|04-SRNP-35101|669[On]bp
Narcosius colossus|[7268]|05-SRNP-2080|669[On]bp
Narcosius colossus|[7269]|07-SRNP-23315|669[On]bp
Narcosius colossus|[7270]|08-SRNP-4789|669[On]bp
Narcosius helen|[7271]|96-SRNP-7367|576[1n]bp
Narcosius helen|[7272]|06-SRNP-59517|669[On]bp
Narcosius helen|[7273]|06-SRNP-22184|669[On]bp
Narcosius helen|[7274]|06-SRNP-3211|669[On]bp
Narcosius helen|[7275]|05-SRNP-65551|630[On]bp
Narcosius helen|[7276]|06-SRNP-46972|657[On]bp
Narcosius helen|[7277]|06-SRNP-60063|615[On]bp
Narcosius helen|[7278]|07-SRNP-57650|636[On]bp
Narcosius nazaraeus|[7279]|09-SRNP-20099|669[On]bp
Aguna claxon|[7280]|05-SRNP-41660|669[On]bp
Aguna claxon|[7281]|05-SRNP-41659|669[On]bp
Aguna claxon|[7282]|05-SRNP-41925|669[On]bp
Aguna claxon|[7283]|06-SRNP-42825|669[On]bp
Aguna claxon|[7284]|07-SRNP-41625|669[On]bp
Aguna claxon|[7285]|09-SRNP-44598|669[On]bp
Aguna panama|[7286]|07-SRNP-55426|669[On]bp
Aguna panama|[7287]|00-SRNP-6020|615[2n]bp
Aguna panama|[7288]|07-SRNP-61073|669[On]bp
Aguna panama|[7289]|07-SRNP-56460|669[On]bp
Aguna panama|[7290]|06-SRNP-58291|669[On]bp
Aguna panama|[7291]|05-SRNP-57368|669[On]bp
Aguna panama|[7292]|00-SRNP-6052|627[2n]bp
Aguna panama|[7293]|08-SRNP-55747|669[1n]bp
Aguna panama|[7294]|07-SRNP-61072|669[On]bp
Aguna panama|[7295]|08-SRNP-55705|669[On]bp
Aguna panama|[7296]|09-SRNP-57341|669[On]bp

```

```

Aguna panama | [294] | 07-SRNP-6102 | 669 [0n] bp
Aguna panama | [7295] | 08-SRNP-55705 | 669 [0n] bp
Aguna panama | [7296] | 09-SRNP-57341 | 669 [0n] bp
Aguna metophis | [7297] | 05-SRNP-41056 | 669 [0n] bp
Aguna asander | [7298] | 05-SRNP-56838 | 669 [0n] bp
Aguna asander | [7299] | 06-SRNP-56534 | 669 [0n] bp
Aguna asander | [7300] | 07-SRNP-56019 | 669 [0n] bp
Aguna asander | [7301] | 07-SRNP-56139 | 669 [0n] bp
Aguna asander | [7302] | 05-SRNP-56840 | 669 [0n] bp
Aguna asander | [7303] | 05-SRNP-56839 | 669 [0n] bp
Aguna asander | [7304] | 06-SRNP-56535 | 660 [2n] bp
Aguna asander | [7305] | 07-SRNP-56140 | 660 [0n] bp
Aguna asander | [7306] | 07-SRNP-56354 | 669 [1n] bp
Aguna asander | [7307] | 07-SRNP-57812 | 624 [0n] bp
Aguna asander | [7308] | 07-SRNP-56518 | 669 [0n] bp
Aguna asander | [7309] | 07-SRNP-56519 | 669 [0n] bp
Aguna asander | [7310] | 07-SRNP-56833 | 669 [0n] bp
Aguna asander | [7311] | 98-SRNP-3363 | 639 [0n] bp
Aguna asander | [7312] | 06-SRNP-56500 | 669 [0n] bp
Aguna asander | [7313] | 06-SRNP-56093 | 669 [0n] bp
Aguna asander | [7314] | 97-SRNP-2360 | 576 [0n] bp
Aguna asander | [7315] | 07-SRNP-56789 | 648 [0n] bp
Aguna asander | [7316] | 06-SRNP-56319 | 624 [0n] bp
Aguna asander | [7317] | 07-SRNP-56524 | 642 [0n] bp
Aguna asander | [7318] | 07-SRNP-56433 | 669 [0n] bp
Aguna asander | [7319] | 07-SRNP-57226 | 642 [0n] bp
Aguna asander | [7320] | 07-SRNP-56791 | 642 [0n] bp
Aguna arunce hypozonius | [7321] | 05-SRNP-57391 | 669 [0n] bp
Aguna arunce hypozonius | [7322] | 05-SRNP-57392 | 669 [0n] bp
Aguna arunce hypozonius | [7323] | 05-SRNP-57393 | 669 [0n] bp
Aguna arunce hypozonius | [7324] | 07-SRNP-56141 | 666 [0n] bp
Aguna arunce hypozonius | [7325] | 07-SRNP-58253 | 645 [0n] bp
Aguna Burns01 | [7326] | 04-SRNP-42390 | 669 [0n] bp
Aguna Burns01 | [7327] | 03-SRNP-21307 | 657 [0n] bp
Aguna Burns01 | [7328] | 03-SRNP-21306 | 621 [0n] bp
Aguna Burns01 | [7329] | 03-SRNP-37032 | 639 [0n] bp
Aguna Burns01 | [7330] | 05-SRNP-41612 | 669 [0n] bp
Aguna Burns01 | [7331] | 05-SRNP-70024 | 669 [0n] bp
Aguna Burns01 | [7332] | 03-SRNP-21373 | 669 [0n] bp
Aguna Burns01 | [7333] | 03-SRNP-21386 | 669 [0n] bp
Aguna Burns01 | [7334] | 08-SRNP-71779 | 669 [0n] bp
Aguna Burns01 | [7335] | 08-SRNP-71112 | 669 [0n] bp
Aguna Burns01 | [7336] | 08-SRNP-71115 | 669 [0n] bp
Aguna Burns01 | [7337] | 08-SRNP-71111 | 669 [0n] bp
Aguna coeloides | [7338] | 07-SRNP-31814 | 669 [0n] bp
Aguna coeloides | [7339] | 02-SRNP-6676 | 645 [0n] bp
Aguna coeloides | [7340] | 03-SRNP-20032 | 645 [0n] bp
Aguna coeloides | [7341] | 03-SRNP-20033 | 612 [0n] bp
Aguna coeloides | [7342] | 02-SRNP-6344 | 627 [0n] bp
Aguna coeloides | [7343] | 08-SRNP-71144 | 669 [0n] bp
Aguna coeloides | [7344] | 08-SRNP-32489 | 669 [0n] bp
Aguna Burns02 | [7345] | 03-SRNP-10346 | 525 [1n] bp
Aguna Burns02 | [7346] | 05-SRNP-43291 | 669 [0n] bp
Aguna Burns02 | [7347] | 05-SRNP-42263 | 669 [0n] bp
Aguna Burns02 | [7348] | 05-SRNP-40266 | 669 [0n] bp
Aguna Burns02 | [7349] | 03-SRNP-10765 | 669 [0n] bp
Aguna Burns02 | [7350] | 03-SRNP-10241 | 639 [0n] bp
Aguna Burns02 | [7351] | 03-SRNP-10064 | 657 [0n] bp
Aguna Burns02 | [7352] | 03-SRNP-31756 | 645 [0n] bp
Aguna Burns02 | [7353] | 06-SRNP-42285 | 618 [0n] bp
Aguna Burns02 | [7354] | 06-SRNP-42575 | 669 [0n] bp
Aguna Burns02 | [7355] | 06-SRNP-42313 | 669 [0n] bp
Aguna Burns02 | [7356] | 06-SRNP-44328 | 669 [0n] bp
Aguna Burns02 | [7357] | 06-SRNP-44327 | 669 [0n] bp
Aguna Burns02 | [7358] | 09-SRNP-69431 | 669 [0n] bp
Aguna Burns02 | [7359] | 09-SRNP-69465 | 669 [0n] bp
Autochton bipunctatus | [7360] | 08-SRNP-30643 | 669 [0n] bp
Autochton Burns01DHJ02 | [7361] | 04-SRNP-45713 | 669 [0n] bp
Autochton Burns01DHJ02 | [7362] | 08-SRNP-1103 | 669 [0n] bp
Autochton Burns01DHJ02 | [7363] | 08-SRNP-1650 | 669 [0n] bp
Autochton Burns01DHJ02 | [7364] | 08-SRNP-1753 | 669 [0n] bp
Autochton Burns01DHJ02 | [7365] | 02-SRNP-2645 | 669 [0n] bp
Autochton Burns01DHJ02 | [7366] | 03-SRNP-19145 | 669 [0n] bp
Autochton Burns01DHJ02 | [7367] | 06-SRNP-59183 | 669 [0n] bp
Autochton Burns01DHJ02 | [7368] | 02-SRNP-2824 | 669 [0n] bp
Autochton Burns01DHJ02 | [7369] | 02-SRNP-2646 | 669 [0n] bp
Autochton Burns01DHJ02 | [7370] | 02-SRNP-2647 | 669 [0n] bp
Autochton Burns01DHJ02 | [7371] | 02-SRNP-2644 | 669 [0n] bp
Autochton Burns01DHJ02 | [7372] | 02-SRNP-2825 | 669 [0n] bp
Autochton Burns01DHJ02 | [7373] | 02-SRNP-2822 | 669 [0n] bp
Autochton Burns01DHJ02 | [7374] | 02-SRNP-2821 | 669 [0n] bp
Autochton Burns01DHJ02 | [7375] | 02-SRNP-6791 | 669 [0n] bp
Autochton Burns01DHJ02 | [7376] | 02-SRNP-2643 | 669 [0n] bp
Autochton Burns01DHJ02 | [7377] | 06-SRNP-2611 | 669 [0n] bp
Autochton Burns01DHJ02 | [7378] | 06-SRNP-1336 | 669 [0n] bp
Autochton Burns01DHJ02 | [7379] | 04-SRNP-45765 | 669 [0n] bp
Autochton Burns01DHJ02 | [7380] | 00-SRNP-3690 | 669 [0n] bp
Autochton Burns01DHJ02 | [7381] | 05-SRNP-46948 | 630 [0n] bp
Autochton Burns01DHJ02 | [7382] | 01-SRNP-1372 | 612 [0n] bp
Autochton Burns01DHJ02 | [7383] | 02-SRNP-2823 | 561 [0n] bp
Autochton Burns01DHJ02 | [7384] | 05-SRNP-59071 | 636 [0n] bp
Autochton Burns01DHJ02 | [7385] | 06-SRNP-9152 | 645 [1n] bp
Autochton Burns01DHJ02 | [7386] | 06-SRNP-9303 | 609 [0n] bp
Autochton Burns01DHJ02 | [7387] | 08-SRNP-1961 | 645 [0n] bp
Autochton Burns01DHJ02 | [7388] | 08-SRNP-1113 | 669 [0n] bp
Autochton Burns01DHJ02 | [7389] | 08-SRNP-1014 | 669 [0n] bp
Autochton Burns01DHJ02 | [7390] | 08-SRNP-1534 | 669 [0n] bp
Autochton Burns01DHJ02 | [7391] | 08-SRNP-1533 | 669 [0n] bp
Autochton Burns01DHJ02 | [7392] | 08-SRNP-40551 | 669 [0n] bp
Autochton Burns01DHJ02 | [7393] | 08-SRNP-749 | 669 [0n] bp
Autochton Burns01DHJ02 | [7394] | 08-SRNP-718 | 669 [0n] bp
Autochton Burns01DHJ02 | [7395] | 08-SRNP-1752 | 669 [0n] bp
Autochton Burns01DHJ02 | [7396] | 08-SRNP-1710 | 669 [0n] bp

```

```

Autochton Burns01DHJ02|[7394]|08-SRNP-118|669|0n]bp
Autochton Burns01DHJ02|[7395]|08-SRNP-1752|669|0n]bp
Autochton Burns01DHJ02|[7396]|08-SRNP-1710|669|0n]bp
Autochton Burns01DHJ02|[7397]|08-SRNP-1649|669|0n]bp
Autochton Burns01DHJ02|[7398]|08-SRNP-1532|669|0n]bp
Autochton Burns01DHJ03|[7399]|03-SRNP-21795|645|4n]bp
Autochton Burns01DHJ03|[7400]|05-SRNP-5444|651|7n]bp
Autochton Burns01DHJ04|[7401]|01-SRNP-2361|669|2n]bp
Autochton Burns01DHJ03|[7402]|03-SRNP-8841|660|3n]bp
Autochton Burns01DHJ03|[7403]|02-SRNP-7452|669|1n]bp
Autochton Burns01DHJ04|[7404]|05-SRNP-42409|648|6n]bp
Autochton Burns01DHJ03|[7405]|02-SRNP-7369|666|1n]bp
Autochton Burns01DHJ03|[7406]|02-SRNP-19075|657|2n]bp
Autochton Burns01DHJ03|[7407]|07-SRNP-1204|669|2n]bp
Autochton Burns01DHJ03|[7408]|00-SRNP-11807|669|2n]bp
Autochton Burns01DHJ03|[7409]|01-SRNP-2359|669|1n]bp
Autochton Burns01DHJ03|[7410]|02-SRNP-6764|663|1n]bp
Autochton Burns01DHJ03|[7411]|01-SRNP-2360|657|1n]bp
Autochton Burns01DHJ03|[7412]|01-SRNP-25357|669|0n]bp
Autochton Burns01DHJ03|[7413]|07-SRNP-524|669|1n]bp
Autochton Burns01DHJ03|[7414]|07-SRNP-466|669|1n]bp
Autochton Burns01DHJ03|[7415]|06-SRNP-34485|669|1n]bp
Autochton Burns01DHJ03|[7416]|03-SRNP-9633|660|1n]bp
Autochton Burns01DHJ03|[7417]|06-SRNP-3321|669|2n]bp
Autochton Burns01DHJ03|[7418]|06-SRNP-3415|666|3n]bp
Autochton Burns01DHJ03|[7419]|07-SRNP-40843|621|0n]bp
Autochton Burns01DHJ03|[7420]|03-SRNP-9631|669|1n]bp
Autochton Burns01DHJ03|[7421]|00-SRNP-1531|636|0n]bp
Autochton Burns01DHJ03|[7422]|03-SRNP-21535|645|1n]bp
Autochton Burns01DHJ03|[7423]|02-SRNP-15018|645|1n]bp
Autochton Burns01DHJ03|[7424]|06-SRNP-43554|657|3n]bp
Autochton Burns01DHJ03|[7425]|02-SRNP-15017|669|2n]bp
Autochton Burns01DHJ03|[7426]|03-SRNP-8817|633|3n]bp
Autochton Burns01DHJ03|[7427]|01-SRNP-3734|657|1n]bp
Autochton Burns01DHJ03|[7428]|03-SRNP-9632|645|2n]bp
Autochton Burns01DHJ04|[7429]|03-SRNP-6742|582|2n]bp
Autochton Burns01DHJ04|[7430]|02-SRNP-17340|636|0n]bp
Autochton Burns01DHJ04|[7431]|07-SRNP-76|609|1n]bp
Autochton Burns01DHJ03|[7432]|07-SRNP-834|669|0n]bp
Autochton Burns01DHJ03|[7433]|03-SRNP-21652|669|0n]bp
Autochton Burns01DHJ03|[7434]|03-SRNP-9634|669|0n]bp
Autochton Burns01DHJ03|[7435]|03-SRNP-6163|669|0n]bp
Autochton Burns01DHJ03|[7436]|03-SRNP-21660|669|0n]bp
Autochton Burns01DHJ03|[7437]|06-SRNP-43772|669|0n]bp
Autochton Burns01DHJ03|[7438]|07-SRNP-3126|621|0n]bp
Autochton Burns01DHJ03|[7439]|08-SRNP-1863|669|0n]bp
Autochton Burns01DHJ03|[7440]|08-SRNP-724|669|0n]bp
Autochton Burns01DHJ03|[7441]|01-SRNP-1271|669|2n]bp
Autochton Burns01DHJ03|[7442]|08-SRNP-723|669|5n]bp
Autochton Burns01DHJ04|[7443]|03-SRNP-5976|669|1n]bp
Autochton Burns01DHJ04|[7444]|06-SRNP-40471|669|3n]bp
Autochton Burns01DHJ04|[7445]|02-SRNP-5075|633|3n]bp
Autochton Burns01DHJ05|[7446]|07-SRNP-2033|648|0n]bp
Autochton Burns01DHJ04|[7447]|02-SRNP-17338|582|2n]bp
Autochton Burns01DHJ04|[7448]|08-SRNP-1535|639|5n]bp
Autochton Burns01DHJ04|[7449]|08-SRNP-1648|639|3n]bp
Autochton Burns01DHJ04|[7450]|05-SRNP-4301|687|5n]bp
Autochton Burns01DHJ04|[7451]|05-SRNP-32030|669|1n]bp
Autochton Burns01DHJ04|[7452]|01-SRNP-2650|669|0n]bp
Autochton Burns01DHJ04|[7453]|01-SRNP-2651|624|1n]bp
Autochton Burns01DHJ04|[7454]|01-SRNP-2652|621|3n]bp
Autochton Burns01DHJ04|[7455]|02-SRNP-17339|669|0n]bp
Autochton Burns01DHJ04|[7456]|04-SRNP-60519|669|4n]bp
Autochton Burns01DHJ04|[7457]|01-SRNP-1371|642|3n]bp
Autochton Burns01DHJ04|[7458]|05-SRNP-43435|669|4n]bp
Autochton Burns01DHJ04|[7459]|03-SRNP-8819|669|3n]bp
Autochton Burns01DHJ04|[7460]|03-SRNP-21425|669|3n]bp
Autochton Burns01DHJ04|[7461]|08-SRNP-41353|669|0n]bp
Autochton Burns01DHJ04|[7462]|06-SRNP-43553|669|1n]bp
Autochton Burns01DHJ04|[7463]|03-SRNP-9628|645|1n]bp
Autochton Burns01DHJ04|[7464]|07-SRNP-1157|657|0n]bp
Autochton Burns01DHJ04|[7465]|02-SRNP-30483|669|0n]bp
Autochton Burns01DHJ04|[7466]|02-SRNP-1953|669|0n]bp
Autochton Burns01DHJ04|[7467]|02-SRNP-3878|669|0n]bp
Autochton Burns01DHJ04|[7468]|02-SRNP-28933|669|0n]bp
Autochton Burns01DHJ04|[7469]|03-SRNP-9630|669|0n]bp
Autochton Burns01DHJ04|[7470]|00-SRNP-11621|669|0n]bp
Autochton Burns01DHJ04|[7471]|00-SRNP-12409|669|0n]bp
Autochton Burns01DHJ04|[7472]|01-SRNP-3899|669|0n]bp
Autochton Burns01DHJ04|[7473]|06-SRNP-65526|669|0n]bp
Autochton Burns01DHJ04|[7474]|01-SRNP-25365|669|0n]bp
Autochton Burns01DHJ04|[7475]|02-SRNP-19076|669|0n]bp
Autochton Burns01DHJ04|[7476]|04-SRNP-3794|669|0n]bp
Autochton Burns01DHJ04|[7477]|02-SRNP-2648|669|0n]bp
Autochton Burns01DHJ04|[7478]|01-SRNP-3735|645|0n]bp
Autochton Burns01DHJ04|[7479]|04-SRNP-60826|627|0n]bp
Autochton Burns01DHJ04|[7480]|06-SRNP-65122|666|0n]bp
Autochton Burns01DHJ04|[7481]|06-SRNP-34487|657|1n]bp
Autochton Burns01DHJ04|[7482]|05-SRNP-21742|648|6n]bp
Autochton Burns01DHJ04|[7483]|03-SRNP-21668|639|0n]bp
Autochton Burns01DHJ04|[7484]|03-SRNP-9627|639|1n]bp
Autochton Burns01DHJ04|[7485]|03-SRNP-9626|609|0n]bp
Autochton Burns01DHJ04|[7486]|02-SRNP-19077|645|0n]bp
Autochton Burns01DHJ04|[7487]|08-SRNP-5469|669|0n]bp
Autochton Burns01DHJ05|[7488]|00-SRNP-1187|645|3n]bp
Autochton Burns01DHJ05|[7489]|06-SRNP-2060|669|2n]bp
Autochton Burns01DHJ05|[7490]|01-SRNP-3733|669|1n]bp
Autochton Burns01DHJ05|[7491]|03-SRNP-9837|645|0n]bp
Autochton Burns01DHJ05|[7492]|03-SRNP-21655|669|0n]bp
Autochton Burns01DHJ05|[7493]|03-SRNP-31321|600|0n]bp
Autochton Burns01DHJ05|[7494]|06-SRNP-9700|669|0n]bp
Autochton Burns01DHJ05|[7495]|03-SRNP-13047.1|669|0n]bp
Autochton Burns01DHJ05|[7496]|03-SRNP-10151|645|0n]bp

```

```

Autochtou Burns01DHJ05|[7494]|06-SRNP-9700|669[On]bp
Autochtou Burns01DHJ05|[7495]|03-SRNP-13047.1|669[On]bp
Autochtou Burns01DHJ05|[7496]|03-SRNP-10151|645[On]bp
Autochtou Burns01DHJ05|[7497]|04-SRNP-22708|669[On]bp
Autochtou Burns01DHJ05|[7498]|04-SRNP-22710|669[On]bp
Autochtou Burns01DHJ05|[7499]|02-SRNP-14078|669[On]bp
Autochtou Burns01DHJ05|[7500]|01-SRNP-3736|669[On]bp
Autochtou Burns01DHJ05|[7501]|01-SRNP-1893|669[On]bp
Autochtou Burns01DHJ05|[7502]|08-SRNP-1358|669[On]bp
Autochtou Burns01DHJ05|[7503]|08-SRNP-6305|669[On]bp
Cabares potrillo|[7504]|09-SRNP-57001|669[On]bp
Cabares potrillo|[7505]|06-SRNP-58154|669[On]bp
Cabares potrillo|[7506]|95-SRNP-6015|351[On]bp
Cabares potrillo|[7507]|09-SRNP-57000|669[On]bp
Cabares potrillo|[7508]|09-SRNP-57002|669[On]bp
Cabares potrillo|[7509]|09-SRNP-57090|669[On]bp
Mysoria ambigua|[7510]|03-SRNP-1431|645[On]bp
Mysoria ambigua|[7511]|08-SRNP-24392|669[On]bp
Mysoria ambigua|[7512]|08-SRNP-55431|669[On]bp
Mysoria ambigua|[7513]|05-SRNP-57606|669[On]bp
Mysoria ambigua|[7514]|05-SRNP-55647|669[On]bp
Mysoria ambigua|[7515]|04-SRNP-23872|669[On]bp
Mysoria ambigua|[7516]|04-SRNP-14802|669[On]bp
Mysoria ambigua|[7517]|04-SRNP-14797|669[On]bp
Mysoria ambigua|[7518]|04-SRNP-14796|669[On]bp
Mysoria ambigua|[7519]|04-SRNP-14795|669[On]bp
Mysoria ambigua|[7520]|04-SRNP-14800|669[On]bp
Mysoria ambigua|[7521]|04-SRNP-14801|669[On]bp
Mysoria ambigua|[7522]|05-SRNP-55178|669[On]bp
Mysoria ambigua|[7523]|04-SRNP-14558|669[On]bp
Mysoria ambigua|[7524]|04-SRNP-14099|669[On]bp
Mysoria ambigua|[7525]|05-SRNP-55193|669[On]bp
Mysoria ambigua|[7526]|05-SRNP-55175|669[On]bp
Mysoria ambigua|[7527]|08-SRNP-55530|669[On]bp
Mysoria ambigua|[7528]|03-SRNP-1293|657[On]bp
Mysoria ambigua|[7529]|04-SRNP-14584|627[On]bp
Mysoria ambigua|[7530]|08-SRNP-24269|627[On]bp
Jemadia Burns01|[7531]|01-SRNP-9029|567[On]bp
Jemadia Burns01|[7532]|04-SRNP-30754|669[On]bp
Jemadia Burns01|[7533]|03-SRNP-21823|669[On]bp
Jemadia Burns01|[7534]|03-SRNP-21528|669[On]bp
Jemadia Burns01|[7535]|04-SRNP-32358|669[On]bp
Jemadia Burns01|[7536]|04-SRNP-34396|669[On]bp
Jemadia Burns01|[7537]|05-SRNP-31969|669[On]bp
Jemadia Burns01|[7538]|00-SRNP-4482|630[On]bp
Jemadia Burns01|[7539]|04-SRNP-56811|669[On]bp
Jemadia Burns01|[7540]|05-SRNP-31086|669[On]bp
Jemadia Burns01|[7541]|96-SRNP-12846|618[On]bp
Jemadia Burns01|[7542]|02-SRNP-13059|645[On]bp
Jemadia Burns01|[7543]|09-SRNP-30034|642[On]bp
Elbella scylla|[7544]|04-SRNP-13405|669[On]bp
Elbella scylla|[7545]|07-SRNP-32122|669[On]bp
Elbella scylla|[7546]|07-SRNP-65187|669[On]bp
Elbella scylla|[7547]|08-SRNP-70068|669[On]bp
Elbella scylla|[7548]|08-SRNP-70229|669[On]bp
Elbella scylla|[7549]|05-SRNP-31078|669[On]bp
Elbella scylla|[7550]|05-SRNP-12075|669[On]bp
Elbella scylla|[7551]|05-SRNP-31568|669[On]bp
Elbella scylla|[7552]|08-SRNP-72172|669[On]bp
Elbella scylla|[7553]|08-SRNP-70307|669[On]bp
Elbella scylla|[7554]|08-SRNP-55460|669[On]bp
Elbella scylla|[7555]|08-SRNP-55401|669[On]bp
Elbella scylla|[7556]|08-SRNP-55397|669[On]bp
Elbella scylla|[7557]|08-SRNP-70314|669[On]bp
Elbella scylla|[7558]|06-SRNP-67774|669[On]bp
Elbella scylla|[7559]|05-SRNP-31077|669[On]bp
Elbella scylla|[7560]|05-SRNP-55736|669[On]bp
Elbella scylla|[7561]|05-SRNP-13170|669[On]bp
Elbella scylla|[7562]|04-SRNP-13706|669[On]bp
Elbella scylla|[7563]|04-SRNP-13406|669[On]bp
Elbella scylla|[7564]|04-SRNP-13082|669[On]bp
Elbella scylla|[7565]|04-SRNP-13081|669[On]bp
Elbella scylla|[7566]|04-SRNP-21136|669[On]bp
Elbella scylla|[7567]|07-SRNP-21861|666[On]bp
Elbella scylla|[7568]|07-SRNP-57964|657[On]bp
Elbella scylla|[7569]|03-SRNP-232|573[On]bp
Elbella scylla|[7570]|07-SRNP-65934|648[On]bp
Elbella scylla|[7571]|08-SRNP-70185|645[On]bp
Elbella scylla|[7572]|03-SRNP-635|642[On]bp
Elbella scylla|[7573]|08-SRNP-23853|612[On]bp
Elbella patrobas|[7574]|07-SRNP-31402|669[On]bp
Elbella patrobas|[7575]|06-SRNP-33024|669[On]bp
Elbella patrobas|[7576]|03-SRNP-6393|639[On]bp
Elbella patrobas|[7577]|07-SRNP-2792|669[On]bp
Elbella patrobas|[7578]|07-SRNP-4287|669[On]bp
Elbella patrobas|[7579]|08-SRNP-2588|669[On]bp
Elbella patrobasDHJ05|[7580]|07-SRNP-3722|669[On]bp
Elbella merops|[7581]|05-SRNP-32782|669[On]bp
Elbella merops|[7582]|08-SRNP-70940|669[On]bp
Elbella merops|[7583]|05-SRNP-41519|669[On]bp
Elbella merops|[7584]|09-SRNP-30538|633[On]bp
Elbella merops|[7585]|09-SRNP-71893|669[On]bp
Jemadia pseudognetus|[7586]|01-SRNP-1773|528[On]bp
Jemadia pseudognetus|[7587]|02-SRNP-3211|576[On]bp
Jemadia pseudognetus|[7588]|08-SRNP-4381|669[On]bp
Jemadia pseudognetus|[7589]|08-SRNP-639|669[On]bp
Jemadia pseudognetus|[7590]|07-SRNP-65061|669[On]bp
Jemadia pseudognetus|[7591]|07-SRNP-45220|669[On]bp
Jemadia pseudognetus|[7592]|07-SRNP-2561|669[On]bp
Jemadia pseudognetus|[7593]|07-SRNP-1947|669[On]bp
Jemadia pseudognetus|[7594]|07-SRNP-2837|669[On]bp
Jemadia pseudognetus|[7595]|07-SRNP-3517|669[On]bp
Jemadia pseudognetus|[7596]|05-SRNP-7825|669[On]bp

```

Jemadia pseudognetus | 7594 | 07-SRNP-283 | 669 | 0n | bp  
 Jemadia pseudognetus | 7595 | 07-SRNP-3517 | 669 | 0n | bp  
 Jemadia pseudognetus | 7596 | 05-SRNP-7825 | 669 | 0n | bp  
 Jemadia pseudognetus | 7597 | 05-SRNP-4394 | 669 | 0n | bp  
 Jemadia pseudognetus | 7598 | 05-SRNP-2922 | 669 | 0n | bp  
 Jemadia pseudognetus | 7599 | 05-SRNP-3192 | 669 | 0n | bp  
 Jemadia pseudognetus | 7600 | 05-SRNP-4069 | 669 | 0n | bp  
 Jemadia pseudognetus | 7601 | 04-SRNP-4113 | 669 | 0n | bp  
 Jemadia pseudognetus | 7602 | 06-SRNP-1088 | 669 | 1n | bp  
 Jemadia pseudognetus | 7603 | 05-SRNP-4395 | 669 | 0n | bp  
 Jemadia pseudognetus | 7604 | 02-SRNP-18659 | 627 | 0n | bp  
 Jemadia pseudognetus | 7605 | 02-SRNP-18802 | 627 | 0n | bp  
 Jemadia pseudognetus | 7606 | 04-SRNP-26478 | 561 | 1n | bp  
 Jemadia pseudognetus | 7607 | 06-SRNP-67850 | 633 | 0n | bp  
 Jemadia pseudognetus | 7608 | 07-SRNP-2602 | 645 | 0n | bp  
 Jemadia pseudognetus | 7609 | 08-SRNP-289 | 654 | 0n | bp  
 Jemadia pseudognetus | 7610 | 01-SRNP-2420 | 654 | 0n | bp  
 Jemadia pseudognetus | 7611 | 02-SRNP-1552 | 576 | 0n | bp  
 Jemadia pseudognetus | 7612 | 08-SRNP-65423 | 669 | 0n | bp  
 Parelbella macleannani | 7613 | 06-SRNP-8158 | 669 | 0n | bp  
 Parelbella macleannani | 7614 | 04-SRNP-24065 | 669 | 0n | bp  
 Parelbella macleannani | 7615 | 04-SRNP-23689 | 669 | 0n | bp  
 Parelbella macleannani | 7616 | 04-SRNP-21620 | 669 | 0n | bp  
 Parelbella macleannani | 7617 | 04-SRNP-23317 | 669 | 0n | bp  
 Parelbella macleannani | 7618 | 04-SRNP-23795 | 669 | 0n | bp  
 Parelbella macleannani | 7619 | 04-SRNP-23300 | 669 | 0n | bp  
 Parelbella macleannani | 7620 | 01-SRNP-163 | 534 | 3n | bp  
 Parelbella macleannani | 7621 | 00-SRNP-571 | 597 | 0n | bp  
 Parelbella macleannani | 7622 | 07-SRNP-19 | 660 | 0n | bp  
 Parelbella macleannani | 7623 | 07-SRNP-425 | 669 | 0n | bp  
 Parelbella macleannani | 7624 | 07-SRNP-20933 | 669 | 0n | bp  
 Parelbella macleannani | 7625 | 06-SRNP-23440 | 669 | 0n | bp  
 Parelbella macleannani | 7626 | 07-SRNP-2509 | 669 | 0n | bp  
 Parelbella macleannani | 7627 | 07-SRNP-3362 | 669 | 0n | bp  
 Parelbella macleannani | 7628 | 07-SRNP-2510 | 669 | 0n | bp  
 Parelbella macleannani | 7629 | 07-SRNP-23463 | 669 | 0n | bp  
 Parelbella macleannani | 7630 | 07-SRNP-22879 | 669 | 0n | bp  
 Parelbella macleannani | 7631 | 09-SRNP-20914 | 669 | 0n | bp  
 Yanguna cosyra | 7632 | 03-SRNP-5253 | 567 | 1n | bp  
 Yanguna cosyra | 7633 | 03-SRNP-3068 | 663 | 0n | bp  
 Yanguna cosyra | 7634 | 04-SRNP-35097 | 669 | 0n | bp  
 Yanguna cosyra | 7635 | 04-SRNP-35058 | 669 | 0n | bp  
 Yanguna cosyra | 7636 | 04-SRNP-35285 | 669 | 0n | bp  
 Yanguna cosyra | 7637 | 04-SRNP-35120 | 669 | 0n | bp  
 Yanguna cosyra | 7638 | 04-SRNP-35115 | 669 | 0n | bp  
 Yanguna cosyra | 7639 | 04-SRNP-35110 | 669 | 0n | bp  
 Yanguna cosyra | 7640 | 04-SRNP-35116 | 669 | 0n | bp  
 Yanguna cosyra | 7641 | 04-SRNP-35122 | 669 | 0n | bp  
 Yanguna cosyra | 7642 | 05-SRNP-35027 | 669 | 0n | bp  
 Yanguna cosyra | 7643 | 05-SRNP-35042 | 669 | 0n | bp  
 Yanguna cosyra | 7644 | 05-SRNP-35054 | 669 | 0n | bp  
 Yanguna cosyra | 7645 | 06-SRNP-65100 | 669 | 0n | bp  
 Yanguna cosyra | 7646 | 07-SRNP-41792 | 669 | 0n | bp  
 Yanguna cosyra | 7647 | 07-SRNP-2192 | 669 | 0n | bp  
 Yanguna cosyra | 7648 | 07-SRNP-2272 | 669 | 0n | bp  
 Yanguna cosyra | 7649 | 07-SRNP-41479 | 669 | 0n | bp  
 Yanguna cosyra | 7650 | 07-SRNP-41979 | 669 | 0n | bp  
 Yanguna cosyra | 7651 | 07-SRNP-36506 | 669 | 0n | bp  
 Yanguna cosyra | 7652 | 07-SRNP-35955 | 669 | 0n | bp  
 Yanguna cosyra | 7653 | 08-SRNP-35914 | 669 | 0n | bp  
 Yanguna cosyra | 7654 | 08-SRNP-31712 | 669 | 0n | bp  
 Jonaspnye aesculapus | 7655 | 03-SRNP-3336 | 669 | 0n | bp  
 Jonaspnye aesculapus | 7656 | 04-SRNP-35065 | 669 | 0n | bp  
 Jonaspnye aesculapus | 7657 | 98-SRNP-2286 | 633 | 0n | bp  
 Jonaspnye aesculapus | 7658 | 98-SRNP-2048.1 | 630 | 0n | bp  
 Jonaspnye aesculapus | 7659 | 97-SRNP-514 | 639 | 0n | bp  
 Jonaspnye aesculapus | 7660 | 04-SRNP-35064 | 576 | 0n | bp  
 Jonaspnye aesculapus | 7661 | 04-SRNP-35130 | 669 | 0n | bp  
 Jonaspnye aesculapus | 7662 | 05-SRNP-35055 | 669 | 0n | bp  
 Jonaspnye aesculapus | 7663 | 02-SRNP-23111 | 657 | 0n | bp  
 Jonaspnye aesculapus | 7664 | 04-SRNP-35066 | 630 | 0n | bp  
 Jonaspnye aesculapus | 7665 | 97-SRNP-2105 | 621 | 0n | bp  
 Jonaspnye aesculapus | 7666 | 00-SRNP-9360 | 630 | 0n | bp  
 Creonpyge creon | 7667 | 06-SRNP-36175 | 669 | 0n | bp  
 Creonpyge creon | 7668 | 02-SRNP-8028 | 669 | 0n | bp  
 Creonpyge creon | 7669 | 01-SRNP-7147 | 669 | 0n | bp  
 Creonpyge creon | 7670 | 01-SRNP-7399 | 669 | 0n | bp  
 Creonpyge creon | 7671 | 02-SRNP-9441 | 669 | 0n | bp  
 Creonpyge creon | 7672 | 03-SRNP-3109 | 669 | 0n | bp  
 Creonpyge creon | 7673 | 98-SRNP-2317 | 633 | 0n | bp  
 Creonpyge creon | 7674 | 03-SRNP-3108 | 657 | 0n | bp  
 Creonpyge creon | 7675 | 02-SRNP-8026 | 660 | 0n | bp  
 Creonpyge creon | 7676 | 06-SRNP-36176 | 669 | 0n | bp  
 Melanopyge erythrosticta | 7677 | 03-SRNP-5457 | 645 | 0n | bp  
 Melanopyge erythrosticta | 7678 | 00-SRNP-15831 | 663 | 0n | bp  
 Melanopyge erythrosticta | 7679 | 04-SRNP-34289 | 669 | 0n | bp  
 Melanopyge erythrosticta | 7680 | 05-SRNP-894 | 669 | 0n | bp  
 Melanopyge Burns01 | 7681 | 07-SRNP-992 | 669 | 0n | bp  
 Melanopyge Burns01 | 7682 | 09-SRNP-722 | 669 | 0n | bp  
 Melanopyge Burns01 | 7683 | 05-SRNP-34170 | 669 | 0n | bp  
 Melanopyge Burns01 | 7684 | 07-SRNP-2732 | 669 | 0n | bp  
 Melanopyge Burns01 | 7685 | 05-SRNP-3132 | 669 | 0n | bp  
 Melanopyge Burns01 | 7686 | 05-SRNP-309 | 669 | 0n | bp  
 Melanopyge Burns01 | 7687 | 04-SRNP-3561 | 669 | 0n | bp  
 Melanopyge Burns01 | 7688 | 04-SRNP-3562 | 669 | 0n | bp  
 Melanopyge Burns01 | 7689 | 04-SRNP-4008 | 669 | 0n | bp  
 Melanopyge Burns01 | 7690 | 04-SRNP-3996 | 669 | 0n | bp  
 Melanopyge Burns01 | 7691 | 04-SRNP-3563 | 669 | 0n | bp  
 Melanopyge Burns01 | 7692 | 07-SRNP-65400 | 642 | 0n | bp  
 Melanopyge Burns01 | 7693 | 02-SRNP-14905 | 642 | 0n | bp  
 Melanopyge Burns01 | 7694 | 05-SRNP-34206 | 630 | 0n | bp  
 Melanopyge Burns01 | 7695 | 08-SRNP-71628 | 639 | 0n | bp  
 Melanopyge Burns01 | 7696 | 09-SRNP-65504 | 657 | 0n | bp

```

Melanopyge Burns01|[7694]|05-SRNP-34206|630|Un]bp
Melanopyge Burns01|[7695]|08-SRNP-71628|639|On]bp
Melanopyge Burns01|[7696]|09-SRNP-65504|657|On]bp
Pyrrhopyge zenodorusDHJ01|[7697]|04-SRNP-41678|669|On]bp
Pyrrhopyge zenodorusDHJ01|[7698]|00-SRNP-1645|669|On]bp
Pyrrhopyge zenodorusDHJ01|[7699]|01-SRNP-9155|669|On]bp
Pyrrhopyge zenodorusDHJ01|[7700]|06-SRNP-1697|669|On]bp
Pyrrhopyge zenodorusDHJ01|[7701]|06-SRNP-42909|669|On]bp
Pyrrhopyge zenodorusDHJ01|[7702]|06-SRNP-4369|669|On]bp
Pyrrhopyge zenodorusDHJ03|[7703]|05-SRNP-59692|669|1n]bp
Pyrrhopyge zenodorusDHJ03|[7704]|06-SRNP-60372|669|On]bp
Pyrrhopyge zenodorusDHJ03|[7705]|05-SRNP-66260|603|1n]bp
Pyrrhopyge zenodorusDHJ03|[7706]|05-SRNP-66171|573|1n]bp
Pyrrhopyge zenodorusDHJ03|[7707]|99-SRNP-5161|669|On]bp
Pyrrhopyge zenodorusDHJ03|[7708]|07-SRNP-3197|669|On]bp
Pyrrhopyge zenodorusDHJ03|[7709]|08-SRNP-70278|669|On]bp
Pyrrhopyge zenodorusDHJ03|[7710]|08-SRNP-70280|669|On]bp
Pyrrhopyge zenodorusDHJ02|[7711]|08-SRNP-72317|549|On]bp
Pyrrhopyge zenodorusDHJ02|[7712]|00-SRNP-20566|609|On]bp
Pyrrhopyge zenodorusDHJ02|[7713]|07-SRNP-65619|669|On]bp
Pyrrhopyge zenodorusDHJ02|[7714]|07-SRNP-45223|669|On]bp
Pyrrhopyge zenodorusDHJ02|[7715]|06-SRNP-9502|669|On]bp
Pyrrhopyge zenodorusDHJ02|[7716]|06-SRNP-46215|669|On]bp
Pyrrhopyge zenodorusDHJ02|[7717]|06-SRNP-6822|669|On]bp
Pyrrhopyge zenodorusDHJ02|[7718]|06-SRNP-7823|669|On]bp
Pyrrhopyge zenodorusDHJ02|[7719]|06-SRNP-20133|669|On]bp
Pyrrhopyge zenodorusDHJ02|[7720]|99-SRNP-12050|669|On]bp
Pyrrhopyge zenodorusDHJ02|[7721]|99-SRNP-5532|669|On]bp
Pyrrhopyge zenodorusDHJ02|[7722]|02-SRNP-14950|669|On]bp
Pyrrhopyge zenodorusDHJ02|[7723]|01-SRNP-1501|669|On]bp
Pyrrhopyge zenodorusDHJ02|[7724]|00-SRNP-14177|669|On]bp
Pyrrhopyge zenodorusDHJ02|[7725]|00-SRNP-2007|669|On]bp
Pyrrhopyge zenodorusDHJ02|[7726]|00-SRNP-22185|669|On]bp
Pyrrhopyge zenodorusDHJ02|[7727]|00-SRNP-14143|669|On]bp
Pyrrhopyge zenodorusDHJ02|[7728]|00-SRNP-11309|669|On]bp
Pyrrhopyge zenodorusDHJ02|[7729]|00-SRNP-2010|669|On]bp
Pyrrhopyge zenodorusDHJ02|[7730]|02-SRNP-23595|669|On]bp
Pyrrhopyge zenodorusDHJ02|[7731]|02-SRNP-14179|669|On]bp
Pyrrhopyge zenodorusDHJ02|[7732]|01-SRNP-4744|669|On]bp
Pyrrhopyge zenodorusDHJ02|[7733]|03-SRNP-1421|669|On]bp
Pyrrhopyge zenodorusDHJ02|[7734]|05-SRNP-49652|669|On]bp
Pyrrhopyge zenodorusDHJ02|[7735]|06-SRNP-116|669|On]bp
Pyrrhopyge zenodorusDHJ02|[7736]|05-SRNP-59691|669|On]bp
Pyrrhopyge zenodorusDHJ02|[7737]|04-SRNP-47942|669|On]bp
Pyrrhopyge zenodorusDHJ02|[7738]|04-SRNP-47938|669|On]bp
Pyrrhopyge zenodorusDHJ02|[7739]|04-SRNP-48199|669|On]bp
Pyrrhopyge zenodorusDHJ02|[7740]|04-SRNP-47940|669|On]bp
Pyrrhopyge zenodorusDHJ02|[7741]|02-SRNP-15035|666|On]bp
Pyrrhopyge zenodorusDHJ02|[7742]|07-SRNP-45520|669|On]bp
Pyrrhopyge zenodorusDHJ02|[7743]|07-SRNP-45519|669|On]bp
Pyrrhopyge zenodorusDHJ02|[7744]|06-SRNP-65140|663|On]bp
Pyrrhopyge zenodorusDHJ02|[7745]|03-SRNP-1418|624|On]bp
Pyrrhopyge zenodorusDHJ02|[7746]|03-SRNP-5466|630|On]bp
Pyrrhopyge zenodorusDHJ02|[7747]|00-SRNP-14681|618|On]bp
Pyrrhopyge zenodorusDHJ02|[7748]|06-SRNP-44426|597|On]bp
Pyrrhopyge zenodorusDHJ02|[7749]|08-SRNP-65047|606|On]bp
Pyrrhopyge zenodorusDHJ02|[7750]|08-SRNP-70328|669|On]bp
Pyrrhopyge zenodorusDHJ02|[7751]|08-SRNP-2416|669|On]bp
Pyrrhopyge zenodorusDHJ02|[7752]|09-SRNP-69426|669|On]bp
Pyrrhopyge zenodorusDHJ02|[7753]|09-SRNP-71854|669|On]bp
Pyrrhopyge zenodorusDHJ02|[7754]|09-SRNP-71853|669|On]bp
Pyrrhopyge zenodorusDHJ02|[7755]|09-SRNP-41493|669|On]bp
Pyrrhopyge crida|[7756]|07-SRNP-65395|633|On]bp
Pyrrhopyge crida|[7757]|07-SRNP-65251|660|On]bp
Pyrrhopyge crida|[7758]|07-SRNP-65439|660|On]bp
Pyrrhopyge crida|[7759]|07-SRNP-65440|669|On]bp
Pyrrhopyge crida|[7760]|07-SRNP-65431|669|On]bp
Pyrrhopyge crida|[7761]|07-SRNP-65427|669|On]bp
Pyrrhopyge crida|[7762]|07-SRNP-65438|669|On]bp
Pyrrhopyge crida|[7763]|07-SRNP-65517|669|On]bp
Pyrrhopyge crida|[7764]|07-SRNP-65248|669|On]bp
Pyrrhopyge crida|[7765]|07-SRNP-65186|669|On]bp
Pyrrhopyge crida|[7766]|07-SRNP-21159|669|On]bp
Pyrrhopyge crida|[7767]|07-SRNP-65432|669|On]bp
Pyrrhopyge crida|[7768]|05-SRNP-23087|669|On]bp
Pyrrhopyge crida|[7769]|05-SRNP-20774|669|On]bp
Pyrrhopyge crida|[7770]|05-SRNP-20610|669|On]bp
Pyrrhopyge crida|[7771]|05-SRNP-20173|669|On]bp
Pyrrhopyge crida|[7772]|04-SRNP-32575|669|On]bp
Pyrrhopyge crida|[7773]|04-SRNP-34740|669|On]bp
Pyrrhopyge crida|[7774]|04-SRNP-34738|669|On]bp
Pyrrhopyge crida|[7775]|04-SRNP-34984|669|On]bp
Pyrrhopyge crida|[7776]|04-SRNP-33852|669|On]bp
Pyrrhopyge crida|[7777]|04-SRNP-34744|669|On]bp
Pyrrhopyge crida|[7778]|04-SRNP-34924|669|On]bp
Pyrrhopyge crida|[7779]|05-SRNP-20692|669|On]bp
Pyrrhopyge crida|[7780]|05-SRNP-20180|669|On]bp
Pyrrhopyge crida|[7781]|05-SRNP-20171|669|On]bp
Pyrrhopyge crida|[7782]|05-SRNP-20775|669|On]bp
Pyrrhopyge crida|[7783]|04-SRNP-34275|669|On]bp
Pyrrhopyge crida|[7784]|04-SRNP-32812|669|On]bp
Pyrrhopyge crida|[7785]|04-SRNP-32576|669|On]bp
Pyrrhopyge crida|[7786]|03-SRNP-21852|669|On]bp
Pyrrhopyge crida|[7787]|03-SRNP-21862|669|On]bp
Pyrrhopyge crida|[7788]|04-SRNP-30780|669|On]bp
Pyrrhopyge crida|[7789]|03-SRNP-21855|669|On]bp
Pyrrhopyge crida|[7790]|03-SRNP-21853|669|On]bp
Pyrrhopyge crida|[7791]|05-SRNP-20952|651|On]bp
Pyrrhopyge crida|[7792]|07-SRNP-65585|666|On]bp
Pyrrhopyge crida|[7793]|07-SRNP-65426|666|On]bp
Pyrrhopyge crida|[7794]|03-SRNP-1149|642|On]bp
Pyrrhopyge crida|[7795]|01-SRNP-9130|624|On]bp
Pyrrhopyge crida|[7796]|07-SRNP-65584|621|On]bp
    
```

```

Pyrrhopyge crida| [7794] |03-SRNP-1149|642[0n]bp
Pyrrhopyge crida| [7795] |01-SRNP-9130|624[0n]bp
Pyrrhopyge crida| [7796] |07-SRNP-65584|621[0n]bp
Pyrrhopyge crida| [7797] |07-SRNP-66213|648[0n]bp
Pyrrhopyge crida| [7798] |03-SRNP-21536|564[2n]bp
Pyrrhopyge crida| [7799] |03-SRNP-21486|603[1n]bp
Pyrrhopyge crida| [7800] |05-SRNP-20964|585[0n]bp
Pyrrhopyge crida| [7801] |08-SRNP-65031|603[0n]bp
Pyrrhopyge crida| [7802] |07-SRNP-65757|669[0n]bp
Pyrrhopyge crida| [7803] |07-SRNP-65984|669[0n]bp
Pyrrhopyge crida| [7804] |09-SRNP-20790|669[0n]bp
Myscelus amystis| [7805] |96-SRNP-365|537[3n]bp
Myscelus amystis| [7806] |05-SRNP-20512|669[1n]bp
Myscelus amystis| [7807] |04-SRNP-26567|687[0n]bp
Myscelus amystis| [7808] |05-SRNP-20288|669[0n]bp
Myscelus amystis| [7809] |05-SRNP-20428|669[0n]bp
Myscelus amystis| [7810] |05-SRNP-20589|669[0n]bp
Myscelus amystis| [7811] |05-SRNP-20514|669[0n]bp
Myscelus amystis| [7812] |04-SRNP-24102|669[0n]bp
Myscelus amystis| [7813] |04-SRNP-21290|669[0n]bp
Myscelus amystis| [7814] |00-SRNP-6023|669[0n]bp
Myscelus amystis| [7815] |00-SRNP-20049|594[0n]bp
Myscelus amystis| [7816] |05-SRNP-20426|375[2n]bp
Myscelus amystis| [7817] |05-SRNP-20706|669[0n]bp
Myscelus amystis| [7818] |04-SRNP-26566|669[0n]bp
Myscelus amystis| [7819] |05-SRNP-20582|669[0n]bp
Passova gellias| [7820] |06-SRNP-47761|609[0n]bp
Passova gellias| [7821] |08-SRNP-5050|669[0n]bp
Passova gellias| [7822] |98-SRNP-2698|639[0n]bp
Passova gellias| [7823] |02-SRNP-33556|666[0n]bp
Passova gellias| [7824] |03-SRNP-4222|666[0n]bp
Passova gellias| [7825] |01-SRNP-3818|666[0n]bp
Passova gellias| [7826] |08-SRNP-5586|669[0n]bp
Passova gellias| [7827] |08-SRNP-5267|669[0n]bp
Passova gellias| [7828] |07-SRNP-23493|669[0n]bp
Passova gellias| [7829] |07-SRNP-65612|669[0n]bp
Passova gellias| [7830] |07-SRNP-2695|669[0n]bp
Passova gellias| [7831] |07-SRNP-65778|669[0n]bp
Passova gellias| [7832] |02-SRNP-33544|669[0n]bp
Passova gellias| [7833] |02-SRNP-18208|669[0n]bp
Passova gellias| [7834] |03-SRNP-25876|669[0n]bp
Passova gellias| [7835] |03-SRNP-34742|669[0n]bp
Passova gellias| [7836] |02-SRNP-18690|669[0n]bp
Passova gellias| [7837] |02-SRNP-18842|669[0n]bp
Passova gellias| [7838] |04-SRNP-35968|669[0n]bp
Passova gellias| [7839] |04-SRNP-33962|669[0n]bp
Passova gellias| [7840] |04-SRNP-46731|669[0n]bp
Passova gellias| [7841] |04-SRNP-2750|669[0n]bp
Passova gellias| [7842] |02-SRNP-18968|669[0n]bp
Passova gellias| [7843] |07-SRNP-501|660[0n]bp
Passova gellias| [7844] |02-SRNP-903|660[0n]bp
Passova gellias| [7845] |04-SRNP-4530|648[0n]bp
Passova gellias| [7846] |02-SRNP-18863|528[0n]bp
Passova gellias| [7847] |08-SRNP-348|582[0n]bp
Passova gellias| [7848] |09-SRNP-881|636[0n]bp
Passova gellias| [7849] |08-SRNP-5268|669[0n]bp
Passova gellias| [7850] |09-SRNP-57397|669[0n]bp
Myscelus assaricus michaeli| [7851] |04-SRNP-1946|669[0n]bp
Myscelus assaricus michaeli| [7852] |02-SRNP-33561|669[0n]bp
Myscelus assaricus michaeli| [7853] |02-SRNP-33559|669[0n]bp
Myscelus assaricus michaeli| [7854] |02-SRNP-33574|669[0n]bp
Myscelus assaricus michaeli| [7855] |04-SRNP-2100|669[0n]bp
Myscelus assaricus michaeli| [7856] |04-SRNP-2099|669[0n]bp
Myscelus assaricus michaeli| [7857] |03-SRNP-6544|657[0n]bp
Myscelus assaricus michaeli| [7858] |03-SRNP-6120|633[0n]bp
Myscelus assaricus michaeli| [7859] |02-SRNP-33572|660[0n]bp
Myscelus assaricus michaeli| [7860] |02-SRNP-33568|660[0n]bp
Myscelus assaricus michaeli| [7861] |03-SRNP-5954|669[0n]bp
Myscelus assaricus michaeli| [7862] |08-SRNP-1740|669[0n]bp
Myscelus assaricus michaeli| [7863] |08-SRNP-65643|669[0n]bp
Myscelus perissodora| [7864] |03-SRNP-6256|654[0n]bp
Myscelus perissodora| [7865] |99-SRNP-2587|657[0n]bp
Myscelus belti| [7866] |07-SRNP-66198|666[0n]bp
Myscelus belti| [7867] |07-SRNP-1252|669[0n]bp
Myscelus belti| [7868] |07-SRNP-3251|669[0n]bp
Myscelus belti| [7869] |08-SRNP-1651|669[0n]bp
Myscelus belti| [7870] |08-SRNP-72474|669[0n]bp
Myscelus belti| [7871] |07-SRNP-3252|669[0n]bp
Myscelus belti| [7872] |07-SRNP-36505|669[0n]bp
Myscelus belti| [7873] |09-SRNP-20103|669[0n]bp
Myscelus belti| [7874] |09-SRNP-20720|669[0n]bp
Myscelus belti| [7875] |09-SRNP-4463|669[0n]bp
Myscelus belti| [7876] |09-SRNP-4464|669[0n]bp
Myscelus belti| [7877] |07-SRNP-32809|669[0n]bp
Myscelus belti| [7878] |05-SRNP-2091|669[0n]bp
Myscelus belti| [7879] |04-SRNP-34960|669[0n]bp
Myscelus belti| [7880] |04-SRNP-3418|669[0n]bp
Myscelus belti| [7881] |04-SRNP-23919|669[0n]bp
Myscelus belti| [7882] |04-SRNP-23918|669[0n]bp
Myscelus belti| [7883] |04-SRNP-31804|669[0n]bp
Myscelus belti| [7884] |04-SRNP-33998|669[0n]bp
Myscelus belti| [7885] |04-SRNP-35333|669[0n]bp
Myscelus belti| [7886] |04-SRNP-35100|669[0n]bp
Myscelus belti| [7887] |04-SRNP-35393|669[0n]bp
Myscelus belti| [7888] |07-SRNP-65976|669[1n]bp
Myscelus belti| [7889] |07-SRNP-3391|660[0n]bp
Myscelus belti| [7890] |03-SRNP-6307|645[0n]bp
Myscelus belti| [7891] |07-SRNP-65974|654[0n]bp
Myscelus belti| [7892] |03-SRNP-3151|630[0n]bp
Myscelus belti| [7893] |07-SRNP-66043|642[0n]bp
Myscelus belti| [7894] |09-SRNP-69008|642[0n]bp
Myscelus belti| [7895] |09-SRNP-20102|669[0n]bp
Oxynetra hopfferi| [7896] |02-SRNP-23286|630[0n]bp

```



|  |                           |        |               |     |        |
|--|---------------------------|--------|---------------|-----|--------|
|  | Myscelus belti            | [7894] | 09-SRNP-69008 | 642 | [On]bp |
|  | Myscelus belti            | [7895] | 09-SRNP-20102 | 669 | [On]bp |
|  | Oxynetra hopfferi         | [7896] | 02-SRNP-23286 | 630 | [On]bp |
|  | Oxynetra hopfferi         | [7897] | 02-SRNP-23284 | 645 | [On]bp |
|  | Oxynetra hopfferi         | [7898] | 01-SRNP-6995  | 669 | [On]bp |
|  | Oxynetra hopfferi         | [7899] | 02-SRNP-23283 | 669 | [On]bp |
|  | Oxynetra hopfferi         | [7900] | 02-SRNP-23540 | 669 | [On]bp |
|  | Oxynetra hopfferi         | [7901] | 02-SRNP-24529 | 669 | [On]bp |
|  | Oxynetra hopfferi         | [7902] | 02-SRNP-23285 | 669 | [On]bp |
|  | Oxynetra hopfferi         | [7903] | 02-SRNP-23109 | 669 | [On]bp |
|  | Oxynetra hopfferi         | [7904] | 02-SRNP-23110 | 669 | [On]bp |
|  | Oxynetra hopfferi         | [7905] | 03-SRNP-3638  | 669 | [On]bp |
|  | Bungalotis erythus        | [7906] | 08-SRNP-65506 | 669 | [On]bp |
|  | Bungalotis erythus        | [7907] | 08-SRNP-70954 | 669 | [On]bp |
|  | Bungalotis erythus        | [7908] | 08-SRNP-21006 | 669 | [On]bp |
|  | Bungalotis erythus        | [7909] | 08-SRNP-20672 | 669 | [On]bp |
|  | Bungalotis erythus        | [7910] | 07-SRNP-46538 | 669 | [On]bp |
|  | Bungalotis erythus        | [7911] | 07-SRNP-65250 | 669 | [On]bp |
|  | Bungalotis erythus        | [7912] | 07-SRNP-41269 | 669 | [On]bp |
|  | Bungalotis erythus        | [7913] | 07-SRNP-21991 | 669 | [On]bp |
|  | Bungalotis erythus        | [7914] | 07-SRNP-940   | 669 | [On]bp |
|  | Bungalotis erythus        | [7915] | 05-SRNP-33392 | 669 | [On]bp |
|  | Bungalotis erythus        | [7916] | 06-SRNP-20583 | 669 | [On]bp |
|  | Bungalotis erythus        | [7917] | 05-SRNP-45216 | 669 | [On]bp |
|  | Bungalotis erythus        | [7918] | 05-SRNP-47613 | 669 | [On]bp |
|  | Bungalotis erythus        | [7919] | 04-SRNP-55857 | 669 | [On]bp |
|  | Bungalotis erythus        | [7920] | 04-SRNP-22883 | 669 | [On]bp |
|  | Bungalotis erythus        | [7921] | 04-SRNP-61431 | 669 | [On]bp |
|  | Bungalotis erythus        | [7922] | 04-SRNP-3609  | 669 | [On]bp |
|  | Bungalotis erythus        | [7923] | 05-SRNP-20556 | 669 | [On]bp |
|  | Bungalotis erythus        | [7924] | 04-SRNP-22815 | 669 | [On]bp |
|  | Bungalotis erythus        | [7925] | 04-SRNP-4963  | 669 | [On]bp |
|  | Bungalotis erythus        | [7926] | 07-SRNP-20903 | 666 | [On]bp |
|  | Bungalotis erythus        | [7927] | 01-SRNP-24401 | 654 | [On]bp |
|  | Bungalotis erythus        | [7928] | 07-SRNP-941   | 645 | [On]bp |
|  | Bungalotis erythus        | [7929] | 97-SRNP-6142  | 627 | [On]bp |
|  | Bungalotis erythus        | [7930] | 08-SRNP-70955 | 621 | [On]bp |
|  | Bungalotis erythus        | [7931] | 08-SRNP-65224 | 645 | [On]bp |
|  | Bungalotis erythus        | [7932] | 07-SRNP-36879 | 645 | [On]bp |
|  | Bungalotis erythus        | [7933] | 08-SRNP-200   | 645 | [On]bp |
|  | Bungalotis erythus        | [7934] | 08-SRNP-65769 | 669 | [On]bp |
|  | Bungalotis quadratumDHJ02 | [7935] | 05-SRNP-2515  | 669 | [2n]bp |
|  | Bungalotis quadratumDHJ02 | [7936] | 07-SRNP-66034 | 666 | [On]bp |
|  | Bungalotis quadratumDHJ02 | [7937] | 05-SRNP-23625 | 666 | [On]bp |
|  | Bungalotis quadratumDHJ02 | [7938] | 05-SRNP-3116  | 654 | [On]bp |
|  | Bungalotis quadratumDHJ02 | [7939] | 07-SRNP-4096  | 651 | [On]bp |
|  | Bungalotis quadratumDHJ02 | [7940] | 07-SRNP-66035 | 645 | [On]bp |
|  | Bungalotis quadratumDHJ02 | [7941] | 06-SRNP-31687 | 666 | [On]bp |
|  | Bungalotis quadratumDHJ02 | [7942] | 03-SRNP-1484  | 645 | [1n]bp |
|  | Bungalotis quadratumDHJ02 | [7943] | 02-SRNP-33238 | 594 | [On]bp |
|  | Bungalotis quadratumDHJ02 | [7944] | 02-SRNP-14657 | 585 | [On]bp |
|  | Bungalotis quadratumDHJ02 | [7945] | 02-SRNP-20465 | 585 | [On]bp |
|  | Bungalotis quadratumDHJ02 | [7946] | 05-SRNP-21979 | 669 | [On]bp |
|  | Bungalotis quadratumDHJ02 | [7947] | 06-SRNP-517   | 669 | [On]bp |
|  | Bungalotis quadratumDHJ02 | [7948] | 08-SRNP-65212 | 669 | [On]bp |
|  | Bungalotis quadratumDHJ02 | [7949] | 08-SRNP-65420 | 669 | [On]bp |
|  | Bungalotis quadratumDHJ02 | [7950] | 05-SRNP-41328 | 669 | [On]bp |
|  | Bungalotis quadratumDHJ02 | [7951] | 05-SRNP-3115  | 687 | [On]bp |
|  | Bungalotis quadratumDHJ02 | [7952] | 04-SRNP-10345 | 669 | [On]bp |
|  | Bungalotis quadratumDHJ02 | [7953] | 05-SRNP-21480 | 669 | [On]bp |
|  | Bungalotis quadratumDHJ02 | [7954] | 05-SRNP-41367 | 669 | [On]bp |
|  | Bungalotis quadratumDHJ02 | [7955] | 05-SRNP-40975 | 669 | [On]bp |
|  | Bungalotis quadratumDHJ02 | [7956] | 06-SRNP-3854  | 669 | [On]bp |
|  | Bungalotis quadratumDHJ02 | [7957] | 08-SRNP-65367 | 669 | [On]bp |
|  | Bungalotis quadratumDHJ02 | [7958] | 08-SRNP-65296 | 669 | [On]bp |
|  | Bungalotis quadratumDHJ02 | [7959] | 08-SRNP-2181  | 669 | [On]bp |
|  | Bungalotis quadratumDHJ02 | [7960] | 05-SRNP-21366 | 666 | [2n]bp |
|  | Bungalotis quadratumDHJ02 | [7961] | 07-SRNP-42298 | 669 | [On]bp |
|  | Bungalotis quadratumDHJ02 | [7962] | 07-SRNP-2736  | 669 | [On]bp |
|  | Bungalotis quadratumDHJ02 | [7963] | 05-SRNP-1726  | 669 | [On]bp |
|  | Bungalotis quadratumDHJ02 | [7964] | 05-SRNP-12052 | 669 | [On]bp |
|  | Bungalotis quadratumDHJ02 | [7965] | 04-SRNP-21541 | 669 | [On]bp |
|  | Bungalotis quadratumDHJ02 | [7966] | 05-SRNP-8122  | 669 | [On]bp |
|  | Bungalotis quadratumDHJ02 | [7967] | 04-SRNP-20799 | 669 | [On]bp |
|  | Bungalotis quadratumDHJ02 | [7968] | 05-SRNP-64394 | 633 | [On]bp |
|  | Bungalotis quadratumDHJ02 | [7969] | 07-SRNP-2182  | 669 | [On]bp |
|  | Bungalotis quadratumDHJ02 | [7970] | 07-SRNP-65520 | 645 | [On]bp |
|  | Bungalotis quadratumDHJ02 | [7971] | 08-SRNP-65306 | 669 | [On]bp |
|  | Bungalotis quadratumDHJ02 | [7972] | 08-SRNP-318   | 669 | [On]bp |
|  | Bungalotis quadratumDHJ02 | [7973] | 08-SRNP-21949 | 669 | [On]bp |
|  | Bungalotis quadratumDHJ02 | [7974] | 08-SRNP-21946 | 669 | [On]bp |
|  | Bungalotis quadratumDHJ01 | [7975] | 07-SRNP-20456 | 666 | [On]bp |
|  | Bungalotis quadratumDHJ01 | [7976] | 07-SRNP-65502 | 669 | [On]bp |
|  | Bungalotis quadratumDHJ01 | [7977] | 08-SRNP-1902  | 669 | [On]bp |
|  | Bungalotis quadratumDHJ01 | [7978] | 08-SRNP-55655 | 669 | [On]bp |
|  | Bungalotis quadratumDHJ01 | [7979] | 08-SRNP-65339 | 669 | [On]bp |
|  | Bungalotis quadratumDHJ01 | [7980] | 08-SRNP-20633 | 669 | [On]bp |
|  | Bungalotis quadratumDHJ01 | [7981] | 08-SRNP-20846 | 669 | [On]bp |
|  | Bungalotis quadratumDHJ01 | [7982] | 08-SRNP-65211 | 669 | [On]bp |
|  | Bungalotis quadratumDHJ01 | [7983] | 07-SRNP-42880 | 669 | [On]bp |
|  | Bungalotis quadratumDHJ01 | [7984] | 08-SRNP-65342 | 669 | [On]bp |
|  | Bungalotis quadratumDHJ01 | [7985] | 08-SRNP-2564  | 669 | [On]bp |
|  | Bungalotis quadratumDHJ01 | [7986] | 07-SRNP-1559  | 669 | [On]bp |
|  | Bungalotis quadratumDHJ01 | [7987] | 07-SRNP-1560  | 669 | [On]bp |
|  | Bungalotis quadratumDHJ01 | [7988] | 07-SRNP-1561  | 669 | [On]bp |
|  | Bungalotis quadratumDHJ01 | [7989] | 06-SRNP-5401  | 669 | [On]bp |
|  | Bungalotis quadratumDHJ01 | [7990] | 05-SRNP-2294  | 669 | [On]bp |
|  | Bungalotis quadratumDHJ01 | [7991] | 05-SRNP-2447  | 669 | [On]bp |
|  | Bungalotis quadratumDHJ01 | [7992] | 05-SRNP-21145 | 669 | [On]bp |
|  | Bungalotis quadratumDHJ01 | [7993] | 05-SRNP-12053 | 669 | [On]bp |
|  | Bungalotis quadratumDHJ01 | [7994] | 05-SRNP-2293  | 669 | [On]bp |
|  | Bungalotis quadratumDHJ01 | [7995] | 05-SRNP-21739 | 669 | [On]bp |
|  | Bungalotis quadratumDHJ01 | [7996] | 04-SRNP-32299 | 669 | [On]bp |

Bungalotis quadratumDHJ01|[7994]|05-SRNP-2293|669[0n]bp  
 Bungalotis quadratumDHJ01|[7995]|05-SRNP-21739|669[0n]bp  
 Bungalotis quadratumDHJ01|[7996]|04-SRNP-32299|669[0n]bp  
 Bungalotis quadratumDHJ01|[7997]|04-SRNP-20807|669[0n]bp  
 Bungalotis quadratumDHJ01|[7998]|04-SRNP-21611|669[0n]bp  
 Bungalotis quadratumDHJ01|[7999]|07-SRNP-1876|666[0n]bp  
 Bungalotis quadratumDHJ01|[8000]|03-SRNP-1652|642[0n]bp  
 Bungalotis quadratumDHJ01|[8001]|07-SRNP-21698|663[0n]bp  
 Bungalotis quadratumDHJ01|[8002]|05-SRNP-3021|552[0n]bp  
 Bungalotis quadratumDHJ01|[8003]|02-SRNP-1284|621[0n]bp  
 Bungalotis quadratumDHJ01|[8004]|02-SRNP-20466|621[0n]bp  
 Bungalotis quadratumDHJ01|[8005]|02-SRNP-31454|621[0n]bp  
 Bungalotis quadratumDHJ01|[8006]|03-SRNP-1253|621[0n]bp  
 Bungalotis quadratumDHJ01|[8007]|02-SRNP-14135|621[0n]bp  
 Bungalotis quadratumDHJ01|[8008]|02-SRNP-4554|594[1n]bp  
 Bungalotis quadratumDHJ01|[8009]|02-SRNP-2667|594[0n]bp  
 Bungalotis quadratumDHJ01|[8010]|02-SRNP-1283|585[0n]bp  
 Bungalotis quadratumDHJ01|[8011]|02-SRNP-33827|585[0n]bp  
 Bungalotis quadratumDHJ01|[8012]|02-SRNP-2075|585[0n]bp  
 Bungalotis quadratumDHJ01|[8013]|02-SRNP-4552|585[0n]bp  
 Bungalotis quadratumDHJ01|[8014]|07-SRNP-46004|513[1n]bp  
 Bungalotis quadratumDHJ01|[8015]|08-SRNP-65328|669[0n]bp  
 Bungalotis quadratumDHJ01|[8016]|08-SRNP-40971|669[0n]bp  
 Bungalotis quadratumDHJ01|[8017]|08-SRNP-65688|669[0n]bp  
 Bungalotis quadratumDHJ01|[8018]|09-SRNP-20206|669[0n]bp  
 Bungalotis quadratumDHJ01|[8019]|05-SRNP-12177|645[0n]bp  
 Bungalotis quadratumDHJ01|[8020]|05-SRNP-3054|669[3n]bp  
 Bungalotis quadratumDHJ01|[8021]|05-SRNP-30602|669[4n]bp  
 Bungalotis quadratumDHJ01|[8022]|05-SRNP-3055|645[1n]bp  
 Bungalotis quadratumDHJ01|[8023]|07-SRNP-2743|666[0n]bp  
 Bungalotis quadratumDHJ01|[8024]|02-SRNP-6982|621[0n]bp  
 Bungalotis quadratumDHJ01|[8025]|05-SRNP-3484|669[0n]bp  
 Bungalotis quadratumDHJ01|[8026]|07-SRNP-5038|648[0n]bp  
 Bungalotis quadratumDHJ01|[8027]|05-SRNP-3088|663[1n]bp  
 Bungalotis quadratumDHJ01|[8028]|08-SRNP-40281|669[0n]bp  
 Bungalotis quadratumDHJ01|[8029]|08-SRNP-40180|669[0n]bp  
 Bungalotis quadratumDHJ01|[8030]|08-SRNP-586|669[0n]bp  
 Bungalotis quadratumDHJ01|[8031]|08-SRNP-65341|669[0n]bp  
 Bungalotis quadratumDHJ01|[8032]|08-SRNP-65340|669[0n]bp  
 Bungalotis quadratumDHJ01|[8033]|07-SRNP-12438|669[0n]bp  
 Bungalotis quadratumDHJ01|[8034]|08-SRNP-65454|669[0n]bp  
 Bungalotis quadratumDHJ01|[8035]|08-SRNP-65515|669[0n]bp  
 Bungalotis quadratumDHJ01|[8036]|08-SRNP-65368|669[0n]bp  
 Bungalotis quadratumDHJ01|[8037]|08-SRNP-65459|669[0n]bp  
 Bungalotis quadratumDHJ01|[8038]|08-SRNP-65164|669[0n]bp  
 Bungalotis quadratumDHJ01|[8039]|08-SRNP-267|669[0n]bp  
 Bungalotis quadratumDHJ01|[8040]|07-SRNP-4896|669[0n]bp  
 Bungalotis quadratumDHJ01|[8041]|08-SRNP-65276|669[0n]bp  
 Bungalotis quadratumDHJ01|[8042]|08-SRNP-585|669[0n]bp  
 Bungalotis quadratumDHJ01|[8043]|08-SRNP-65305|669[0n]bp  
 Bungalotis quadratumDHJ01|[8044]|08-SRNP-21065|669[0n]bp  
 Bungalotis quadratumDHJ01|[8045]|08-SRNP-1750|669[0n]bp  
 Bungalotis quadratumDHJ01|[8046]|08-SRNP-45152|669[0n]bp  
 Bungalotis quadratumDHJ01|[8047]|08-SRNP-296|669[0n]bp  
 Bungalotis quadratumDHJ01|[8048]|08-SRNP-2182|669[0n]bp  
 Bungalotis quadratumDHJ01|[8049]|08-SRNP-65327|669[0n]bp  
 Bungalotis quadratumDHJ01|[8050]|08-SRNP-164|669[0n]bp  
 Bungalotis quadratumDHJ01|[8051]|07-SRNP-3504|669[0n]bp  
 Bungalotis quadratumDHJ01|[8052]|08-SRNP-40213|669[0n]bp  
 Bungalotis quadratumDHJ01|[8053]|07-SRNP-21331|669[0n]bp  
 Bungalotis quadratumDHJ01|[8054]|07-SRNP-3488|669[0n]bp  
 Bungalotis quadratumDHJ01|[8055]|07-SRNP-566|669[0n]bp  
 Bungalotis quadratumDHJ01|[8056]|07-SRNP-21349|669[0n]bp  
 Bungalotis quadratumDHJ01|[8057]|05-SRNP-22370|669[0n]bp  
 Bungalotis quadratumDHJ01|[8058]|06-SRNP-41272|669[0n]bp  
 Bungalotis quadratumDHJ01|[8059]|06-SRNP-20160|669[0n]bp  
 Bungalotis quadratumDHJ01|[8060]|06-SRNP-1694|669[0n]bp  
 Bungalotis quadratumDHJ01|[8061]|06-SRNP-2564|669[0n]bp  
 Bungalotis quadratumDHJ01|[8062]|06-SRNP-1945|669[0n]bp  
 Bungalotis quadratumDHJ01|[8063]|06-SRNP-1686|669[0n]bp  
 Bungalotis quadratumDHJ01|[8064]|06-SRNP-260|669[0n]bp  
 Bungalotis quadratumDHJ01|[8065]|05-SRNP-4567|669[0n]bp  
 Bungalotis quadratumDHJ01|[8066]|05-SRNP-999|669[0n]bp  
 Bungalotis quadratumDHJ01|[8067]|05-SRNP-3053|669[0n]bp  
 Bungalotis quadratumDHJ01|[8068]|04-SRNP-48823|669[0n]bp  
 Bungalotis quadratumDHJ01|[8069]|05-SRNP-55167|669[0n]bp  
 Bungalotis quadratumDHJ01|[8070]|07-SRNP-4148|636[0n]bp  
 Bungalotis quadratumDHJ01|[8071]|05-SRNP-20357|636[0n]bp  
 Bungalotis quadratumDHJ01|[8072]|07-SRNP-4097|630[0n]bp  
 Bungalotis quadratumDHJ01|[8073]|07-SRNP-1859|660[0n]bp  
 Bungalotis quadratumDHJ01|[8074]|02-SRNP-3261|621[1n]bp  
 Bungalotis quadratumDHJ01|[8075]|02-SRNP-14043|621[0n]bp  
 Bungalotis quadratumDHJ01|[8076]|02-SRNP-3643|621[0n]bp  
 Bungalotis quadratumDHJ01|[8077]|02-SRNP-2979|621[0n]bp  
 Bungalotis quadratumDHJ01|[8078]|02-SRNP-3867|621[0n]bp  
 Bungalotis quadratumDHJ01|[8079]|02-SRNP-18838|621[0n]bp  
 Bungalotis quadratumDHJ01|[8080]|02-SRNP-2994|621[0n]bp  
 Bungalotis quadratumDHJ01|[8081]|02-SRNP-14137|621[0n]bp  
 Bungalotis quadratumDHJ01|[8082]|02-SRNP-14083|621[0n]bp  
 Bungalotis quadratumDHJ01|[8083]|01-SRNP-628|594[0n]bp  
 Bungalotis quadratumDHJ01|[8084]|02-SRNP-5698|594[0n]bp  
 Bungalotis quadratumDHJ01|[8085]|02-SRNP-2310|585[0n]bp  
 Bungalotis quadratumDHJ01|[8086]|02-SRNP-14094|585[0n]bp  
 Bungalotis quadratumDHJ01|[8087]|02-SRNP-14599|585[0n]bp  
 Bungalotis quadratumDHJ01|[8088]|02-SRNP-5850|582[0n]bp  
 Bungalotis quadratumDHJ01|[8089]|08-SRNP-959|636[0n]bp  
 Bungalotis quadratumDHJ01|[8090]|08-SRNP-40212|645[0n]bp  
 Bungalotis quadratumDHJ01|[8091]|09-SRNP-20809|669[0n]bp  
 Bungalotis astylos|[8092]|04-SRNP-23054|627[0n]bp  
 Bungalotis astylos|[8093]|05-SRNP-3123|669[0n]bp  
 Bungalotis astylos|[8094]|07-SRNP-32268|669[0n]bp  
 Bungalotis astylos|[8095]|06-SRNP-55070|669[0n]bp  
 Bungalotis astylos|[8096]|04-SRNP-48647|669[0n]bp

Bungalotis astylos|[8094]|07-SRNP-32268|669[0n]bp  
 Bungalotis astylos|[8095]|06-SRNP-55070|669[0n]bp  
 Bungalotis astylos|[8096]|04-SRNP-48647|669[0n]bp  
 Bungalotis astylos|[8097]|07-SRNP-31525|669[0n]bp  
 Bungalotis astylos|[8098]|07-SRNP-40972|669[0n]bp  
 Bungalotis astylos|[8099]|07-SRNP-2056|669[0n]bp  
 Bungalotis astylos|[8100]|07-SRNP-42318|669[0n]bp  
 Bungalotis astylos|[8101]|07-SRNP-33568|669[0n]bp  
 Bungalotis astylos|[8102]|06-SRNP-57444|669[0n]bp  
 Bungalotis astylos|[8103]|06-SRNP-59176|669[0n]bp  
 Bungalotis astylos|[8104]|06-SRNP-43639|669[0n]bp  
 Bungalotis astylos|[8105]|06-SRNP-33017|669[0n]bp  
 Bungalotis astylos|[8106]|07-SRNP-57567|669[0n]bp  
 Bungalotis astylos|[8107]|07-SRNP-57566|669[0n]bp  
 Bungalotis astylos|[8108]|05-SRNP-3124|669[0n]bp  
 Bungalotis astylos|[8109]|06-SRNP-58700|585[1n]bp  
 Bungalotis astylos|[8110]|01-SRNP-1961|663[0n]bp  
 Bungalotis astylos|[8111]|07-SRNP-57565|660[0n]bp  
 Bungalotis astylos|[8112]|09-SRNP-31141|660[0n]bp  
 Bungalotis astylos|[8113]|05-SRNP-66563|669[3n]bp  
 Bungalotis astylos|[8114]|06-SRNP-59177|621[0n]bp  
 Bungalotis astylos|[8115]|96-SRNP-11379|639[0n]bp  
 Bungalotis astylos|[8116]|09-SRNP-1890|669[0n]bp  
 Bungalotis midas|[8117]|03-SRNP-12881.1|567[0n]bp  
 Bungalotis midas|[8118]|06-SRNP-43436|666[0n]bp  
 Bungalotis midas|[8119]|03-SRNP-9076|654[0n]bp  
 Bungalotis midas|[8120]|05-SRNP-4908|687[0n]bp  
 Bungalotis midas|[8121]|03-SRNP-15139|660[0n]bp  
 Bungalotis midas|[8122]|94-SRNP-308|399[0n]bp  
 Bungalotis midas|[8123]|03-SRNP-9194|576[0n]bp  
 Bungalotis midas|[8124]|03-SRNP-34185|663[0n]bp  
 Bungalotis midas|[8125]|05-SRNP-4469|669[0n]bp  
 Bungalotis midas|[8126]|06-SRNP-21109|669[0n]bp  
 Bungalotis midas|[8127]|07-SRNP-40390|669[0n]bp  
 Bungalotis midas|[8128]|09-SRNP-44040|669[0n]bp  
 Bungalotis midas|[8129]|09-SRNP-20274|669[0n]bp  
 Bungalotis diophorus|[8130]|06-SRNP-1016|669[2n]bp  
 Bungalotis diophorus|[8131]|05-SRNP-24718|669[0n]bp  
 Bungalotis diophorus|[8132]|07-SRNP-3318|669[0n]bp  
 Bungalotis diophorus|[8133]|07-SRNP-3315|669[0n]bp  
 Bungalotis diophorus|[8134]|08-SRNP-70990|663[0n]bp  
 Bungalotis diophorus|[8135]|04-SRNP-34119|669[0n]bp  
 Bungalotis diophorus|[8136]|04-SRNP-56177|669[0n]bp  
 Bungalotis diophorus|[8137]|08-SRNP-70423|669[0n]bp  
 Bungalotis diophorus|[8138]|08-SRNP-65707|669[1n]bp  
 Bungalotis diophorus|[8139]|03-SRNP-1854|654[0n]bp  
 Bungalotis diophorus|[8140]|03-SRNP-10878|645[0n]bp  
 Bungalotis diophorus|[8141]|04-SRNP-34165|669[0n]bp  
 Bungalotis diophorus|[8142]|04-SRNP-34027|669[0n]bp  
 Bungalotis diophorus|[8143]|04-SRNP-33359|669[0n]bp  
 Bungalotis diophorus|[8144]|04-SRNP-33198|669[0n]bp  
 Bungalotis diophorus|[8145]|05-SRNP-21655|669[0n]bp  
 Bungalotis diophorus|[8146]|05-SRNP-34150|669[0n]bp  
 Bungalotis diophorus|[8147]|07-SRNP-65195|669[0n]bp  
 Bungalotis diophorus|[8148]|07-SRNP-3311|669[0n]bp  
 Bungalotis diophorus|[8149]|07-SRNP-23801|669[0n]bp  
 Bungalotis diophorus|[8150]|07-SRNP-23522|669[0n]bp  
 Bungalotis diophorus|[8151]|08-SRNP-70422|669[0n]bp  
 Bungalotis diophorus|[8152]|08-SRNP-70986|669[0n]bp  
 Bungalotis diophorus|[8153]|08-SRNP-71152|669[0n]bp  
 Bungalotis diophorus|[8154]|09-SRNP-22402|669[0n]bp  
 Nascus paullinae|[8155]|08-SRNP-5198|321[0n]bp  
 Nascus paullinae|[8156]|08-SRNP-5133|321[0n]bp  
 Nascus paullinae|[8157]|99-SRNP-15218|558[0n]bp  
 Nascus paullinae|[8158]|04-SRNP-55249|669[0n]bp  
 Nascus paullinae|[8159]|06-SRNP-7877|669[0n]bp  
 Nascus paullinae|[8160]|05-SRNP-42441|669[0n]bp  
 Nascus paullinae|[8161]|05-SRNP-5420|669[0n]bp  
 Nascus paullinae|[8162]|05-SRNP-888|669[0n]bp  
 Nascus paullinae|[8163]|04-SRNP-14706|669[0n]bp  
 Nascus paullinae|[8164]|04-SRNP-34021|669[0n]bp  
 Nascus paullinae|[8165]|04-SRNP-34682|669[0n]bp  
 Nascus paullinae|[8166]|04-SRNP-14655|669[0n]bp  
 Nascus paullinae|[8167]|04-SRNP-55654|669[0n]bp  
 Nascus paullinae|[8168]|04-SRNP-55794|669[0n]bp  
 Nascus paullinae|[8169]|04-SRNP-55367|669[0n]bp  
 Nascus paullinae|[8170]|04-SRNP-55964|669[0n]bp  
 Nascus paullinae|[8171]|02-SRNP-6701|669[0n]bp  
 Nascus paullinae|[8172]|95-SRNP-9964|627[0n]bp  
 Nascus paullinae|[8173]|05-SRNP-45154|627[0n]bp  
 Nascus paullinae|[8174]|08-SRNP-481|633[0n]bp  
 Nascus paullinae|[8175]|04-SRNP-14559|669[0n]bp  
 Nicephellus nicephorus|[8176]|02-SRNP-27688|495[3n]bp  
 Nicephellus nicephorus|[8177]|02-SRNP-27689|654[0n]bp  
 Salatis canalis|[8178]|02-SRNP-18982|600[1n]bp  
 Salatis canalis|[8179]|05-SRNP-3157|687[0n]bp  
 Salatis canalis|[8180]|08-SRNP-70373|669[0n]bp  
 Salatis canalis|[8181]|08-SRNP-70839|669[0n]bp  
 Salatis canalis|[8182]|08-SRNP-20448|669[0n]bp  
 Salatis canalis|[8183]|07-SRNP-65776|669[0n]bp  
 Salatis canalis|[8184]|08-SRNP-287|669[0n]bp  
 Salatis canalis|[8185]|06-SRNP-9549|669[0n]bp  
 Salatis canalis|[8186]|06-SRNP-44103|669[0n]bp  
 Salatis canalis|[8187]|05-SRNP-1100|669[0n]bp  
 Salatis canalis|[8188]|04-SRNP-60727|669[0n]bp  
 Salatis canalis|[8189]|04-SRNP-1838|669[0n]bp  
 Salatis canalis|[8190]|03-SRNP-1802|645[0n]bp  
 Salatis canalis|[8191]|03-SRNP-35001|645[0n]bp  
 Salatis canalis|[8192]|02-SRNP-18867|645[0n]bp  
 Salatis canalis|[8193]|02-SRNP-19694|645[1n]bp  
 Salatis canalis|[8194]|05-SRNP-1017|666[0n]bp  
 Salatis canalis|[8195]|02-SRNP-3899|645[0n]bp  
 Salatis canalis|[8196]|03-SRNP-5164|645[0n]bp

```

|Salatis canalis|[8194]|05-SRNP-1017|666[0n]bp
|Salatis canalis|[8195]|02-SRNP-3899|645[0n]bp
|Salatis canalis|[8196]|03-SRNP-5164|645[0n]bp
|Salatis canalis|[8197]|07-SRNP-2774|660[0n]bp
|Salatis canalis|[8198]|08-SRNP-20447|645[0n]bp
|Salatis canalis|[8199]|08-SRNP-71642|639[0n]bp
|Salatis canalis|[8200]|08-SRNP-4733|669[0n]bp
|Salatis canalis|[8201]|09-SRNP-22934|669[0n]bp
|Cephise aelius|[8202]|06-SRNP-20598|582[1n]bp
|Cephise aelius|[8203]|06-SRNP-2857|669[0n]bp
|Cephise aelius|[8204]|06-SRNP-30466|669[0n]bp
|Cephise aelius|[8205]|06-SRNP-12607|669[0n]bp
|Cephise aelius|[8206]|06-SRNP-12587|669[0n]bp
|Cephise aelius|[8207]|06-SRNP-12591|669[0n]bp
|Cephise aelius|[8208]|05-SRNP-55123|669[0n]bp
|Cephise aelius|[8209]|06-SRNP-3213|666[0n]bp
|Cephise aelius|[8210]|03-SRNP-234|630[0n]bp
|Cephise aelius|[8211]|03-SRNP-652|597[1n]bp
|Cephise aelius|[8212]|02-SRNP-5365|651[0n]bp
|Cephise aelius|[8213]|02-SRNP-5356|651[0n]bp
|Cephise aelius|[8214]|07-SRNP-55696|669[0n]bp
|Cephise aelius|[8215]|08-SRNP-295|669[0n]bp
|Cephise aelius|[8216]|07-SRNP-61378|669[0n]bp
|Cephise aelius|[8217]|08-SRNP-55427|669[0n]bp
|Cephise aelius|[8218]|09-SRNP-22247|669[0n]bp
|Cephise nuspesezDHJ01|[8219]|05-SRNP-30053|645[0n]bp
|Cephise nuspesezDHJ01|[8220]|07-SRNP-30952|669[0n]bp
|Cephise nuspesezDHJ01|[8221]|08-SRNP-20453|669[0n]bp
|Cephise nuspesezDHJ01|[8222]|08-SRNP-20452|669[0n]bp
|Cephise nuspesezDHJ01|[8223]|09-SRNP-68309|669[0n]bp
|Cephise nuspesezDHJ03|[8224]|02-SRNP-663|651[0n]bp
|Cephise nuspesezDHJ02|[8225]|06-SRNP-59594|618[1n]bp
|Cephise nuspesezDHJ02|[8226]|05-SRNP-40841|669[0n]bp
|Cephise nuspesezDHJ02|[8227]|07-SRNP-58078|669[0n]bp
|Cephise nuspesezDHJ02|[8228]|08-SRNP-2349|669[0n]bp
|Cephise nuspesezDHJ02|[8229]|04-SRNP-21120|585[0n]bp
|Cephise nuspesezDHJ02|[8230]|04-SRNP-41085|624[0n]bp
|Cephise nuspesezDHJ02|[8231]|04-SRNP-56573|624[0n]bp
|Cephise nuspesezDHJ02|[8232]|04-SRNP-24552|624[0n]bp
|Cephise nuspesezDHJ02|[8233]|04-SRNP-42550|624[0n]bp
|Cephise nuspesezDHJ02|[8234]|04-SRNP-56917|624[0n]bp
|Cephise nuspesezDHJ02|[8235]|04-SRNP-1731|624[0n]bp
|Cephise nuspesezDHJ02|[8236]|04-SRNP-56576|624[0n]bp
|Cephise nuspesezDHJ02|[8237]|04-SRNP-56570|624[0n]bp
|Cephise nuspesezDHJ02|[8238]|04-SRNP-47334|624[0n]bp
|Cephise nuspesezDHJ02|[8239]|04-SRNP-61251|624[3n]bp
|Cephise nuspesezDHJ02|[8240]|04-SRNP-35344|624[0n]bp
|Cephise nuspesezDHJ02|[8241]|04-SRNP-45451|669[0n]bp
|Cephise nuspesezDHJ02|[8242]|05-SRNP-40050|669[0n]bp
|Cephise nuspesezDHJ02|[8243]|06-SRNP-23457|669[0n]bp
|Cephise nuspesezDHJ02|[8244]|07-SRNP-31118|645[0n]bp
|Cephise nuspesezDHJ02|[8245]|04-SRNP-1075|645[0n]bp
|Cephise nuspesezDHJ02|[8246]|04-SRNP-40599|645[0n]bp
|Cephise nuspesezDHJ02|[8247]|03-SRNP-21962|645[0n]bp
|Cephise nuspesezDHJ02|[8248]|03-SRNP-21961|645[0n]bp
|Cephise nuspesezDHJ02|[8249]|03-SRNP-5407|645[0n]bp
|Cephise nuspesezDHJ02|[8250]|03-SRNP-3473|645[0n]bp
|Cephise nuspesezDHJ02|[8251]|09-SRNP-20005|669[0n]bp
|Cephise nuspesezDHJ02|[8252]|09-SRNP-387|669[0n]bp
|Cephise nuspesezDHJ02|[8253]|08-SRNP-23259|669[0n]bp
|Cephise nuspesezDHJ02|[8254]|08-SRNP-23248|669[0n]bp
|Cephise nuspesezDHJ02|[8255]|08-SRNP-40706|669[0n]bp
|Cephise nuspesezDHJ02|[8256]|08-SRNP-35369|669[0n]bp
|Cephise nuspesezDHJ02|[8257]|08-SRNP-20435|669[0n]bp
|Cephise nuspesezDHJ02|[8258]|08-SRNP-945|669[0n]bp
|Cephise nuspesezDHJ02|[8259]|08-SRNP-748|669[0n]bp
|Cephise nuspesezDHJ02|[8260]|08-SRNP-40861|669[0n]bp
|Cephise nuspesezDHJ02|[8261]|07-SRNP-58267|669[0n]bp
|Cephise nuspesezDHJ02|[8262]|04-SRNP-61487|669[0n]bp
|Cephise nuspesezDHJ02|[8263]|04-SRNP-48306|669[0n]bp
|Cephise nuspesezDHJ02|[8264]|03-SRNP-5930|651[0n]bp
|Cephise nuspesezDHJ02|[8265]|08-SRNP-655|642[0n]bp
|Cephise nuspesezDHJ02|[8266]|02-SRNP-33859|657[0n]bp
|Cephise nuspesezDHJ02|[8267]|03-SRNP-10602|666[0n]bp
|Cephise nuspesezDHJ02|[8268]|05-SRNP-43495|663[0n]bp
|Cephise nuspesezDHJ02|[8269]|07-SRNP-31639|648[1n]bp
|Cephise nuspesezDHJ02|[8270]|00-SRNP-110|630[0n]bp
|Cephise nuspesezDHJ02|[8271]|03-SRNP-5879|576[0n]bp
|Cephise nuspesezDHJ02|[8272]|04-SRNP-61513|648[1n]bp
|Cephise nuspesezDHJ02|[8273]|03-SRNP-5406|624[0n]bp
|Cephise nuspesezDHJ02|[8274]|02-SRNP-5636|651[0n]bp
|Cephise nuspesezDHJ02|[8275]|03-SRNP-5475|492[0n]bp
|Cephise nuspesezDHJ02|[8276]|07-SRNP-66199|594[0n]bp
|Cephise nuspesezDHJ02|[8277]|08-SRNP-531|645[0n]bp
|Cephise nuspesezDHJ02|[8278]|09-SRNP-20293|669[0n]bp
|Cephise nuspesezDHJ02|[8279]|09-SRNP-20294|669[0n]bp
|Cephise Burns01|[8280]|03-SRNP-10046|639[0n]bp
|Cephise Burns01|[8281]|06-SRNP-41883|669[0n]bp
|Cephise Burns01|[8282]|08-SRNP-31038|669[0n]bp
|Cephise Burns01|[8283]|09-SRNP-69829|669[0n]bp
|Cephise Burns01|[8284]|03-SRNP-10720|657[0n]bp
|Cephise Burns01|[8285]|03-SRNP-10166|657[0n]bp
|Cephise Burns01|[8286]|04-SRNP-34910|669[0n]bp
|Cephise Burns01|[8287]|04-SRNP-34943|669[0n]bp
|Cephise Burns01|[8288]|08-SRNP-42404|633[0n]bp
|Cephise Burns01|[8289]|03-SRNP-21880|597[0n]bp
|Cephise Burns01|[8290]|03-SRNP-10462|513[1n]bp
|Cephise Burns01|[8291]|08-SRNP-24687|669[0n]bp
|Cephise Burns01|[8292]|00-SRNP-11741|630[0n]bp
|Cephise Burns01|[8293]|05-SRNP-24566|645[0n]bp
|Cephise Burns01|[8294]|04-SRNP-32954|669[0n]bp
|Cephise Burns01|[8295]|04-SRNP-41887|669[0n]bp
|Cephise Burns01|[8296]|06-SRNP-41095|669[0n]bp

```

|                             |        |               |     |      |    |
|-----------------------------|--------|---------------|-----|------|----|
| Cephise Burns01             | [8294] | 04-SRNP-32954 | 669 | [0n] | bp |
| Cephise Burns01             | [8295] | 04-SRNP-41887 | 669 | [0n] | bp |
| Cephise Burns01             | [8296] | 06-SRNP-41095 | 669 | [0n] | bp |
| Cephise Burns01             | [8297] | 06-SRNP-23379 | 669 | [0n] | bp |
| Cephise Burns01             | [8298] | 05-SRNP-33964 | 669 | [0n] | bp |
| Cephise Burns01             | [8299] | 09-SRNP-80522 | 669 | [0n] | bp |
| Cephise Burns01             | [8300] | 07-SRNP-41982 | 645 | [0n] | bp |
| Cephise Burns01             | [8301] | 03-SRNP-21881 | 645 | [0n] | bp |
| Cephise Burns01             | [8302] | 05-SRNP-41674 | 603 | [0n] | bp |
| Cephise Burns01             | [8303] | 05-SRNP-23773 | 645 | [0n] | bp |
| Cephise Burns01             | [8304] | 06-SRNP-65516 | 642 | [0n] | bp |
| Cephise Burns01             | [8305] | 08-SRNP-40693 | 669 | [0n] | bp |
| Cephise Burns01             | [8306] | 09-SRNP-40285 | 669 | [0n] | bp |
| Cephise Burns01             | [8307] | 09-SRNP-30023 | 669 | [0n] | bp |
| Cephise Burns01             | [8308] | 09-SRNP-40454 | 669 | [0n] | bp |
| Cephise Burns01             | [8309] | 09-SRNP-67702 | 669 | [0n] | bp |
| Cephise Burns01             | [8310] | 09-SRNP-67936 | 669 | [0n] | bp |
| Cephise Burns01             | [8311] | 08-SRNP-72778 | 669 | [0n] | bp |
| Cephise Burns01             | [8312] | 08-SRNP-42162 | 669 | [0n] | bp |
| Cephise Burns01             | [8313] | 09-SRNP-69828 | 669 | [0n] | bp |
| Cephise Burns01             | [8314] | 07-SRNP-32126 | 669 | [0n] | bp |
| Cephise Burns01             | [8315] | 07-SRNP-32127 | 669 | [0n] | bp |
| Cephise Burns01             | [8316] | 07-SRNP-31871 | 669 | [0n] | bp |
| Cephise Burns01             | [8317] | 06-SRNP-41266 | 669 | [0n] | bp |
| Cephise Burns01             | [8318] | 04-SRNP-42479 | 669 | [0n] | bp |
| Cephise Burns01             | [8319] | 04-SRNP-32936 | 669 | [0n] | bp |
| Cephise Burns01             | [8320] | 04-SRNP-55099 | 669 | [0n] | bp |
| Cephise Burns01             | [8321] | 04-SRNP-56368 | 669 | [0n] | bp |
| Cephise Burns01             | [8322] | 04-SRNP-32391 | 669 | [0n] | bp |
| Cephise Burns01             | [8323] | 04-SRNP-42353 | 669 | [0n] | bp |
| Cephise Burns01             | [8324] | 06-SRNP-34228 | 630 | [0n] | bp |
| Cephise Burns01             | [8325] | 07-SRNP-32173 | 633 | [0n] | bp |
| Cephise Burns01             | [8326] | 01-SRNP-4401  | 624 | [0n] | bp |
| Cephise Burns01             | [8327] | 08-SRNP-24688 | 603 | [0n] | bp |
| Cephise Burns01             | [8328] | 09-SRNP-68422 | 615 | [0n] | bp |
| Dyscophellus phraxanorDHJ01 | [8329] | 00-SRNP-14033 | 669 | [0n] | bp |
| Dyscophellus phraxanorDHJ01 | [8330] | 07-SRNP-32221 | 669 | [0n] | bp |
| Dyscophellus phraxanorDHJ01 | [8331] | 02-SRNP-3482  | 669 | [0n] | bp |
| Dyscophellus phraxanorDHJ01 | [8332] | 01-SRNP-5699  | 669 | [0n] | bp |
| Dyscophellus phraxanorDHJ01 | [8333] | 01-SRNP-22949 | 669 | [0n] | bp |
| Dyscophellus phraxanorDHJ01 | [8334] | 02-SRNP-6877  | 669 | [0n] | bp |
| Dyscophellus phraxanorDHJ01 | [8335] | 99-SRNP-13675 | 669 | [0n] | bp |
| Dyscophellus phraxanorDHJ01 | [8336] | 99-SRNP-12738 | 669 | [0n] | bp |
| Dyscophellus phraxanorDHJ01 | [8337] | 99-SRNP-12756 | 669 | [0n] | bp |
| Dyscophellus phraxanorDHJ01 | [8338] | 99-SRNP-12686 | 669 | [0n] | bp |
| Dyscophellus phraxanorDHJ01 | [8339] | 99-SRNP-12371 | 669 | [0n] | bp |
| Dyscophellus phraxanorDHJ01 | [8340] | 99-SRNP-12368 | 669 | [0n] | bp |
| Dyscophellus phraxanorDHJ01 | [8341] | 01-SRNP-25007 | 669 | [0n] | bp |
| Dyscophellus phraxanorDHJ01 | [8342] | 01-SRNP-175   | 669 | [0n] | bp |
| Dyscophellus phraxanorDHJ01 | [8343] | 00-SRNP-14611 | 669 | [0n] | bp |
| Dyscophellus phraxanorDHJ01 | [8344] | 00-SRNP-14606 | 669 | [0n] | bp |
| Dyscophellus phraxanorDHJ01 | [8345] | 00-SRNP-12745 | 669 | [0n] | bp |
| Dyscophellus phraxanorDHJ01 | [8346] | 99-SRNP-5588  | 669 | [0n] | bp |
| Dyscophellus phraxanorDHJ01 | [8347] | 01-SRNP-64    | 669 | [0n] | bp |
| Dyscophellus phraxanorDHJ01 | [8348] | 99-SRNP-13192 | 669 | [0n] | bp |
| Dyscophellus phraxanorDHJ01 | [8349] | 99-SRNP-13329 | 669 | [0n] | bp |
| Dyscophellus phraxanorDHJ01 | [8350] | 98-SRNP-7943  | 669 | [0n] | bp |
| Dyscophellus phraxanorDHJ01 | [8351] | 02-SRNP-2032  | 669 | [0n] | bp |
| Dyscophellus phraxanorDHJ01 | [8352] | 02-SRNP-982   | 669 | [0n] | bp |
| Dyscophellus phraxanorDHJ01 | [8353] | 02-SRNP-3712  | 669 | [0n] | bp |
| Dyscophellus phraxanorDHJ01 | [8354] | 01-SRNP-3949  | 669 | [0n] | bp |
| Dyscophellus phraxanorDHJ01 | [8355] | 99-SRNP-13337 | 669 | [0n] | bp |
| Dyscophellus phraxanorDHJ01 | [8356] | 00-SRNP-4533  | 669 | [0n] | bp |
| Dyscophellus phraxanorDHJ01 | [8357] | 01-SRNP-9094  | 669 | [0n] | bp |
| Dyscophellus phraxanorDHJ01 | [8358] | 00-SRNP-14920 | 618 | [1n] | bp |
| Dyscophellus phraxanorDHJ01 | [8359] | 99-SRNP-4770  | 660 | [0n] | bp |
| Dyscophellus phraxanorDHJ01 | [8360] | 00-SRNP-22143 | 645 | [0n] | bp |
| Dyscophellus phraxanorDHJ01 | [8361] | 98-SRNP-7950  | 654 | [1n] | bp |
| Dyscophellus phraxanorDHJ01 | [8362] | 99-SRNP-12369 | 609 | [1n] | bp |
| Dyscophellus phraxanorDHJ01 | [8363] | 99-SRNP-13331 | 609 | [0n] | bp |
| Dyscophellus phraxanorDHJ01 | [8364] | 99-SRNP-12797 | 597 | [0n] | bp |
| Dyscophellus phraxanorDHJ01 | [8365] | 07-SRNP-41526 | 627 | [0n] | bp |
| Dyscophellus phraxanorDHJ01 | [8366] | 07-SRNP-41240 | 669 | [0n] | bp |
| Dyscophellus phraxanorDHJ01 | [8367] | 07-SRNP-65772 | 669 | [0n] | bp |
| Dyscophellus phraxanorDHJ01 | [8368] | 08-SRNP-65547 | 669 | [0n] | bp |
| Dyscophellus phraxanorDHJ01 | [8369] | 09-SRNP-68521 | 669 | [0n] | bp |
| Dyscophellus phraxanorDHJ01 | [8370] | 09-SRNP-68520 | 669 | [0n] | bp |
| Dyscophellus phraxanorDHJ04 | [8371] | 99-SRNP-12766 | 669 | [0n] | bp |
| Dyscophellus phraxanorDHJ04 | [8372] | 00-SRNP-4233  | 588 | [0n] | bp |
| Dyscophellus phraxanorDHJ04 | [8373] | 07-SRNP-65144 | 669 | [1n] | bp |
| Dyscophellus phraxanorDHJ04 | [8374] | 08-SRNP-70094 | 669 | [0n] | bp |
| Dyscophellus phraxanorDHJ04 | [8375] | 99-SRNP-12825 | 591 | [0n] | bp |
| Dyscophellus phraxanorDHJ04 | [8376] | 09-SRNP-68523 | 669 | [0n] | bp |
| Dyscophellus phraxanorDHJ02 | [8377] | 08-SRNP-66081 | 669 | [1n] | bp |
| Dyscophellus phraxanorDHJ02 | [8378] | 07-SRNP-65679 | 633 | [0n] | bp |
| Dyscophellus phraxanorDHJ02 | [8379] | 00-SRNP-12285 | 669 | [0n] | bp |
| Dyscophellus phraxanorDHJ02 | [8380] | 00-SRNP-14612 | 669 | [0n] | bp |
| Dyscophellus phraxanorDHJ02 | [8381] | 99-SRNP-12737 | 645 | [0n] | bp |
| Dyscophellus phraxanorDHJ02 | [8382] | 99-SRNP-12807 | 669 | [0n] | bp |
| Dyscophellus phraxanorDHJ02 | [8383] | 02-SRNP-6962  | 669 | [0n] | bp |
| Dyscophellus phraxanorDHJ02 | [8384] | 06-SRNP-65714 | 669 | [0n] | bp |
| Dyscophellus phraxanorDHJ02 | [8385] | 09-SRNP-67283 | 669 | [0n] | bp |
| Dyscophellus phraxanorDHJ03 | [8386] | 07-SRNP-65163 | 669 | [0n] | bp |
| Dyscophellus phraxanorDHJ03 | [8387] | 01-SRNP-4859  | 594 | [0n] | bp |
| Dyscophellus phraxanorDHJ03 | [8388] | 08-SRNP-7035  | 669 | [0n] | bp |
| Dyscophellus phraxanorDHJ03 | [8389] | 01-SRNP-23461 | 669 | [0n] | bp |
| Dyscophellus phraxanorDHJ03 | [8390] | 01-SRNP-22998 | 669 | [0n] | bp |
| Dyscophellus phraxanorDHJ03 | [8391] | 01-SRNP-23558 | 669 | [0n] | bp |
| Dyscophellus phraxanorDHJ03 | [8392] | 01-SRNP-22434 | 624 | [0n] | bp |
| Dyscophellus phraxanorDHJ03 | [8393] | 97-SRNP-6236  | 588 | [0n] | bp |
| Dyscophellus phraxanorDHJ03 | [8394] | 00-SRNP-14728 | 606 | [0n] | bp |
| Dyscophellus phraxanorDHJ03 | [8395] | 07-SRNP-42162 | 669 | [0n] | bp |
| Dyscophellus phraxanorDHJ03 | [8396] | 07-SRNP-65384 | 669 | [0n] | bp |

|              |                |        |               |     |      |    |
|--------------|----------------|--------|---------------|-----|------|----|
| Dyscophellus | phraxanorDHJ03 | [8394] | 00-SRNP-14728 | 606 | [0n] | bp |
| Dyscophellus | phraxanorDHJ03 | [8395] | 07-SRNP-42162 | 669 | [0n] | bp |
| Dyscophellus | phraxanorDHJ03 | [8396] | 07-SRNP-65384 | 669 | [0n] | bp |
| Dyscophellus | phraxanorDHJ03 | [8397] | 02-SRNP-2879  | 669 | [0n] | bp |
| Dyscophellus | phraxanorDHJ03 | [8398] | 07-SRNP-65189 | 669 | [0n] | bp |
| Dyscophellus | phraxanorDHJ03 | [8399] | 98-SRNP-15000 | 669 | [0n] | bp |
| Dyscophellus | phraxanorDHJ03 | [8400] | 99-SRNP-12565 | 669 | [0n] | bp |
| Dyscophellus | phraxanorDHJ03 | [8401] | 99-SRNP-5787  | 669 | [0n] | bp |
| Dyscophellus | phraxanorDHJ03 | [8402] | 04-SRNP-27330 | 669 | [0n] | bp |
| Dyscophellus | phraxanorDHJ03 | [8403] | 04-SRNP-27328 | 669 | [0n] | bp |
| Dyscophellus | phraxanorDHJ03 | [8404] | 04-SRNP-34002 | 669 | [0n] | bp |
| Dyscophellus | phraxanorDHJ03 | [8405] | 99-SRNP-13498 | 669 | [0n] | bp |
| Dyscophellus | phraxanorDHJ02 | [8406] | 99-SRNP-5485  | 654 | [0n] | bp |
| Dyscophellus | phraxanorDHJ02 | [8407] | 98-SRNP-6815  | 606 | [0n] | bp |
| Dyscophellus | phraxanorDHJ02 | [8408] | 99-SRNP-12566 | 633 | [0n] | bp |
| Dyscophellus | phraxanorDHJ02 | [8409] | 01-SRNP-22109 | 585 | [0n] | bp |
| Dyscophellus | phraxanorDHJ02 | [8410] | 97-SRNP-6367  | 609 | [0n] | bp |
| Dyscophellus | phraxanorDHJ02 | [8411] | 01-SRNP-3190  | 594 | [0n] | bp |
| Dyscophellus | phraxanorDHJ02 | [8412] | 99-SRNP-12255 | 606 | [0n] | bp |
| Dyscophellus | phraxanorDHJ02 | [8413] | 97-SRNP-6218  | 582 | [0n] | bp |
| Dyscophellus | phraxanorDHJ02 | [8414] | 99-SRNP-5786  | 585 | [0n] | bp |
| Dyscophellus | phraxanorDHJ03 | [8415] | 01-SRNP-3948  | 669 | [0n] | bp |
| Dyscophellus | phraxanorDHJ03 | [8416] | 99-SRNP-12568 | 669 | [0n] | bp |
| Dyscophellus | phraxanorDHJ03 | [8417] | 99-SRNP-13505 | 669 | [0n] | bp |
| Dyscophellus | phraxanorDHJ03 | [8418] | 99-SRNP-15163 | 669 | [0n] | bp |
| Dyscophellus | phraxanorDHJ03 | [8419] | 07-SRNP-45755 | 669 | [0n] | bp |
| Dyscophellus | phraxanorDHJ03 | [8420] | 08-SRNP-31603 | 669 | [0n] | bp |
| Dyscophellus | phraxanorDHJ03 | [8421] | 07-SRNP-45264 | 669 | [0n] | bp |
| Dyscophellus | phraxanorDHJ03 | [8422] | 99-SRNP-12512 | 669 | [0n] | bp |
| Dyscophellus | phraxanorDHJ03 | [8423] | 01-SRNP-23096 | 669 | [0n] | bp |
| Dyscophellus | phraxanorDHJ03 | [8424] | 99-SRNP-12186 | 669 | [0n] | bp |
| Dyscophellus | phraxanorDHJ03 | [8425] | 01-SRNP-22953 | 624 | [0n] | bp |
| Dyscophellus | phraxanorDHJ03 | [8426] | 02-SRNP-18265 | 627 | [0n] | bp |
| Dyscophellus | phraxanorDHJ03 | [8427] | 98-SRNP-14893 | 651 | [0n] | bp |
| Dyscophellus | phraxanorDHJ03 | [8428] | 05-SRNP-20557 | 645 | [0n] | bp |
| Dyscophellus | phraxanorDHJ03 | [8429] | 01-SRNP-9032  | 669 | [0n] | bp |
| Dyscophellus | phraxanorDHJ03 | [8430] | 08-SRNP-32859 | 669 | [0n] | bp |
| Dyscophellus | phraxanorDHJ02 | [8431] | 08-SRNP-6169  | 666 | [5n] | bp |
| Dyscophellus | phraxanorDHJ02 | [8432] | 00-SRNP-14734 | 669 | [0n] | bp |
| Dyscophellus | phraxanorDHJ02 | [8433] | 99-SRNP-13462 | 669 | [0n] | bp |
| Dyscophellus | phraxanorDHJ02 | [8434] | 01-SRNP-9165  | 669 | [0n] | bp |
| Dyscophellus | phraxanorDHJ02 | [8435] | 99-SRNP-5874  | 669 | [0n] | bp |
| Dyscophellus | phraxanorDHJ02 | [8436] | 02-SRNP-3484  | 669 | [0n] | bp |
| Dyscophellus | phraxanorDHJ02 | [8437] | 00-SRNP-11848 | 669 | [0n] | bp |
| Dyscophellus | phraxanorDHJ02 | [8438] | 00-SRNP-11388 | 669 | [0n] | bp |
| Dyscophellus | phraxanorDHJ02 | [8439] | 99-SRNP-5875  | 630 | [0n] | bp |
| Dyscophellus | phraxanorDHJ02 | [8440] | 00-SRNP-4333  | 669 | [0n] | bp |
| Dyscophellus | phraxanorDHJ02 | [8441] | 99-SRNP-12489 | 669 | [0n] | bp |
| Dyscophellus | phraxanorDHJ02 | [8442] | 00-SRNP-14680 | 669 | [0n] | bp |
| Dyscophellus | phraxanorDHJ02 | [8443] | 01-SRNP-3501  | 669 | [0n] | bp |
| Dyscophellus | phraxanorDHJ02 | [8444] | 07-SRNP-32987 | 669 | [0n] | bp |
| Dyscophellus | phraxanorDHJ02 | [8445] | 04-SRNP-34005 | 669 | [0n] | bp |
| Dyscophellus | phraxanorDHJ02 | [8446] | 04-SRNP-34935 | 669 | [0n] | bp |
| Dyscophellus | phraxanorDHJ02 | [8447] | 07-SRNP-32986 | 669 | [0n] | bp |
| Dyscophellus | phraxanorDHJ02 | [8448] | 98-SRNP-6943  | 669 | [0n] | bp |
| Dyscophellus | phraxanorDHJ02 | [8449] | 02-SRNP-3485  | 669 | [0n] | bp |
| Dyscophellus | phraxanorDHJ02 | [8450] | 02-SRNP-3481  | 669 | [0n] | bp |
| Dyscophellus | phraxanorDHJ02 | [8451] | 99-SRNP-13135 | 669 | [0n] | bp |
| Dyscophellus | phraxanorDHJ02 | [8452] | 00-SRNP-21015 | 669 | [0n] | bp |
| Dyscophellus | phraxanorDHJ02 | [8453] | 00-SRNP-4194  | 669 | [0n] | bp |
| Dyscophellus | phraxanorDHJ02 | [8454] | 01-SRNP-3303  | 669 | [0n] | bp |
| Dyscophellus | phraxanorDHJ02 | [8455] | 01-SRNP-1559  | 669 | [0n] | bp |
| Dyscophellus | phraxanorDHJ02 | [8456] | 06-SRNP-44849 | 669 | [1n] | bp |
| Dyscophellus | phraxanorDHJ02 | [8457] | 02-SRNP-6149  | 624 | [0n] | bp |
| Dyscophellus | phraxanorDHJ02 | [8458] | 04-SRNP-23209 | 669 | [0n] | bp |
| Dyscophellus | phraxanorDHJ02 | [8459] | 01-SRNP-3381  | 669 | [0n] | bp |
| Dyscophellus | phraxanorDHJ02 | [8460] | 01-SRNP-9118  | 669 | [0n] | bp |
| Dyscophellus | phraxanorDHJ02 | [8461] | 01-SRNP-3519  | 669 | [0n] | bp |
| Dyscophellus | phraxanorDHJ02 | [8462] | 97-SRNP-6945  | 630 | [0n] | bp |
| Dyscophellus | phraxanorDHJ02 | [8463] | 01-SRNP-25126 | 603 | [0n] | bp |
| Dyscophellus | phraxanorDHJ02 | [8464] | 01-SRNP-22999 | 669 | [0n] | bp |
| Dyscophellus | phraxanorDHJ02 | [8465] | 01-SRNP-3785  | 627 | [1n] | bp |
| Dyscophellus | phraxanorDHJ02 | [8466] | 02-SRNP-18329 | 645 | [0n] | bp |
| Dyscophellus | phraxanorDHJ02 | [8467] | 97-SRNP-6959  | 582 | [0n] | bp |
| Dyscophellus | phraxanorDHJ02 | [8468] | 00-SRNP-4255  | 564 | [0n] | bp |
| Dyscophellus | phraxanorDHJ02 | [8469] | 97-SRNP-6601  | 606 | [0n] | bp |
| Dyscophellus | phraxanorDHJ02 | [8470] | 99-SRNP-12220 | 606 | [0n] | bp |
| Dyscophellus | phraxanorDHJ02 | [8471] | 99-SRNP-12767 | 606 | [0n] | bp |
| Dyscophellus | phraxanorDHJ02 | [8472] | 99-SRNP-12263 | 657 | [0n] | bp |
| Dyscophellus | phraxanorDHJ02 | [8473] | 99-SRNP-13041 | 603 | [0n] | bp |
| Dyscophellus | phraxanorDHJ02 | [8474] | 99-SRNP-12798 | 606 | [0n] | bp |
| Dyscophellus | phraxanorDHJ02 | [8475] | 00-SRNP-11209 | 582 | [0n] | bp |
| Dyscophellus | phraxanorDHJ02 | [8476] | 99-SRNP-12200 | 633 | [1n] | bp |
| Dyscophellus | phraxanorDHJ02 | [8477] | 99-SRNP-13130 | 627 | [0n] | bp |
| Dyscophellus | phraxanorDHJ02 | [8478] | 01-SRNP-25001 | 588 | [0n] | bp |
| Dyscophellus | phraxanorDHJ02 | [8479] | 01-SRNP-22878 | 594 | [0n] | bp |
| Dyscophellus | phraxanorDHJ02 | [8480] | 98-SRNP-6998  | 609 | [0n] | bp |
| Dyscophellus | phraxanorDHJ02 | [8481] | 97-SRNP-6566  | 609 | [0n] | bp |
| Dyscophellus | phraxanorDHJ02 | [8482] | 97-SRNP-6747  | 606 | [0n] | bp |
| Dyscophellus | phraxanorDHJ02 | [8483] | 00-SRNP-4551  | 606 | [0n] | bp |
| Dyscophellus | phraxanorDHJ02 | [8484] | 02-SRNP-3885  | 624 | [0n] | bp |
| Dyscophellus | phraxanorDHJ02 | [8485] | 08-SRNP-65057 | 645 | [0n] | bp |
| Dyscophellus | phraxanorDHJ02 | [8486] | 08-SRNP-2144  | 645 | [0n] | bp |
| Dyscophellus | phraxanorDHJ02 | [8487] | 01-SRNP-3380  | 669 | [0n] | bp |
| Dyscophellus | phraxanorDHJ02 | [8488] | 01-SRNP-3900  | 669 | [0n] | bp |
| Dyscophellus | phraxanorDHJ02 | [8489] | 01-SRNP-3947  | 669 | [0n] | bp |
| Dyscophellus | phraxanorDHJ02 | [8490] | 07-SRNP-30937 | 669 | [0n] | bp |
| Dyscophellus | phraxanorDHJ02 | [8491] | 07-SRNP-45419 | 669 | [0n] | bp |
| Dyscophellus | phraxanorDHJ02 | [8492] | 07-SRNP-65225 | 669 | [0n] | bp |
| Dyscophellus | phraxanorDHJ02 | [8493] | 99-SRNP-13193 | 669 | [0n] | bp |
| Dyscophellus | phraxanorDHJ02 | [8494] | 99-SRNP-15209 | 669 | [0n] | bp |
| Dyscophellus | phraxanorDHJ02 | [8495] | 07-SRNP-65246 | 669 | [0n] | bp |
| Dyscophellus | phraxanorDHJ02 | [8496] | 07-SRNP-33141 | 669 | [0n] | bp |

|              |                |        |                 |           |
|--------------|----------------|--------|-----------------|-----------|
| Dyscophellus | phraxanorDHJ02 | [8494] | 99-SRNP-15209   | 669[0n]bp |
| Dyscophellus | phraxanorDHJ02 | [8495] | 07-SRNP-65246   | 669[0n]bp |
| Dyscophellus | phraxanorDHJ02 | [8496] | 07-SRNP-33141   | 669[0n]bp |
| Dyscophellus | phraxanorDHJ02 | [8497] | 07-SRNP-65247   | 669[0n]bp |
| Dyscophellus | phraxanorDHJ02 | [8498] | 08-SRNP-4730    | 669[0n]bp |
| Dyscophellus | phraxanorDHJ02 | [8499] | 08-SRNP-65758   | 669[0n]bp |
| Dyscophellus | phraxanorDHJ02 | [8500] | 08-SRNP-65873   | 669[0n]bp |
| Dyscophellus | phraxanorDHJ02 | [8501] | 99-SRNP-12518   | 669[0n]bp |
| Dyscophellus | phraxanorDHJ02 | [8502] | 99-SRNP-12486   | 669[0n]bp |
| Dyscophellus | phraxanorDHJ02 | [8503] | 98-SRNP-15081   | 669[0n]bp |
| Dyscophellus | phraxanorDHJ02 | [8504] | 00-SRNP-12297   | 669[0n]bp |
| Dyscophellus | phraxanorDHJ02 | [8505] | 01-SRNP-3326    | 669[0n]bp |
| Dyscophellus | phraxanorDHJ02 | [8506] | 99-SRNP-12366   | 669[0n]bp |
| Dyscophellus | phraxanorDHJ02 | [8507] | 99-SRNP-12485   | 669[0n]bp |
| Dyscophellus | phraxanorDHJ02 | [8508] | 99-SRNP-12722   | 669[0n]bp |
| Dyscophellus | phraxanorDHJ02 | [8509] | 99-SRNP-12705   | 669[0n]bp |
| Dyscophellus | phraxanorDHJ02 | [8510] | 99-SRNP-12881   | 669[0n]bp |
| Dyscophellus | phraxanorDHJ02 | [8511] | 99-SRNP-12370   | 669[0n]bp |
| Dyscophellus | phraxanorDHJ02 | [8512] | 99-SRNP-12381   | 669[0n]bp |
| Dyscophellus | phraxanorDHJ02 | [8513] | 99-SRNP-12380   | 669[0n]bp |
| Dyscophellus | phraxanorDHJ02 | [8514] | 99-SRNP-12383   | 669[0n]bp |
| Dyscophellus | phraxanorDHJ02 | [8515] | 08-SRNP-66201   | 669[0n]bp |
| Dyscophellus | phraxanorDHJ02 | [8516] | 09-SRNP-56856   | 669[0n]bp |
| Dyscophellus | phraxanorDHJ02 | [8517] | 09-SRNP-57092   | 669[0n]bp |
| Dyscophellus | phraxanorDHJ02 | [8518] | 00-SRNP-22220   | 669[0n]bp |
| Dyscophellus | phraxanorDHJ02 | [8519] | 99-SRNP-12282   | 669[0n]bp |
| Dyscophellus | phraxanorDHJ02 | [8520] | 99-SRNP-12435   | 669[0n]bp |
| Dyscophellus | phraxanorDHJ02 | [8521] | 99-SRNP-4100    | 669[0n]bp |
| Dyscophellus | phraxanorDHJ02 | [8522] | 99-SRNP-4009    | 669[0n]bp |
| Dyscophellus | phraxanorDHJ02 | [8523] | 01-SRNP-22948   | 669[0n]bp |
| Dyscophellus | phraxanorDHJ02 | [8524] | 02-SRNP-18890   | 669[0n]bp |
| Dyscophellus | phraxanorDHJ02 | [8525] | 99-SRNP-13335   | 669[0n]bp |
| Dyscophellus | phraxanorDHJ02 | [8526] | 99-SRNP-13173   | 669[0n]bp |
| Dyscophellus | phraxanorDHJ02 | [8527] | 01-SRNP-1865    | 669[0n]bp |
| Dyscophellus | phraxanorDHJ02 | [8528] | 99-SRNP-4099    | 624[0n]bp |
| Dyscophellus | phraxanorDHJ02 | [8529] | 00-SRNP-12748   | 669[0n]bp |
| Dyscophellus | phraxanorDHJ02 | [8530] | 02-SRNP-3831    | 624[0n]bp |
| Dyscophellus | phraxanorDHJ02 | [8531] | 99-SRNP-12291   | 630[0n]bp |
| Dyscophellus | phraxanorDHJ02 | [8532] | 98-SRNP-15001   | 642[0n]bp |
| Dyscophellus | phraxanorDHJ02 | [8533] | 99-SRNP-4098    | 657[0n]bp |
| Dyscophellus | phraxanorDHJ02 | [8534] | 98-SRNP-6939    | 657[1n]bp |
| Dyscophellus | phraxanorDHJ02 | [8535] | 97-SRNP-6580    | 606[0n]bp |
| Dyscophellus | phraxanorDHJ02 | [8536] | 97-SRNP-6790    | 606[0n]bp |
| Dyscophellus | phraxanorDHJ02 | [8537] | 99-SRNP-5790    | 654[3n]bp |
| Dyscophellus | phraxanorDHJ02 | [8538] | 98-SRNP-6941    | 633[0n]bp |
| Dyscophellus | phraxanorDHJ02 | [8539] | 97-SRNP-6220    | 609[0n]bp |
| Dyscophellus | phraxanorDHJ02 | [8540] | 99-SRNP-12194   | 606[0n]bp |
| Dyscophellus | phraxanorDHJ02 | [8541] | 00-SRNP-14791   | 579[0n]bp |
| Dyscophellus | phraxanorDHJ02 | [8542] | 01-SRNP-497     | 669[0n]bp |
| Dyscophellus | phraxanorDHJ02 | [8543] | 01-SRNP-9119    | 669[0n]bp |
| Dyscophellus | phraxanorDHJ02 | [8544] | 00-SRNP-21016   | 669[0n]bp |
| Dyscophellus | phraxanorDHJ02 | [8545] | 99-SRNP-12367   | 669[0n]bp |
| Dyscophellus | phraxanorDHJ02 | [8546] | 99-SRNP-12688   | 669[0n]bp |
| Dyscophellus | phraxanorDHJ02 | [8547] | 07-SRNP-45265   | 669[0n]bp |
| Dyscophellus | phraxanorDHJ02 | [8548] | 07-SRNP-45263   | 669[0n]bp |
| Dyscophellus | phraxanorDHJ02 | [8549] | 09-SRNP-72343   | 669[0n]bp |
| Dyscophellus | phraxanorDHJ02 | [8550] | 97-SRNP-6512    | 627[1n]bp |
| Dyscophellus | phraxanorDHJ02 | [8551] | 09-SRNP-65857   | 669[0n]bp |
| Dyscophellus | phraxanorDHJ02 | [8552] | 09-SRNP-32343   | 669[0n]bp |
| Dyscophellus | phraxanorDHJ02 | [8553] | 09-SRNP-67110   | 669[0n]bp |
| Dyscophellus | phraxanorDHJ02 | [8554] | 09-SRNP-72763   | 669[0n]bp |
| Dyscophellus | phraxanorDHJ02 | [8555] | 07-SRNP-45964   | 669[0n]bp |
| Dyscophellus | phraxanorDHJ02 | [8556] | 07-SRNP-45952   | 669[0n]bp |
| Dyscophellus | phraxanorDHJ02 | [8557] | 01-SRNP-2916    | 669[0n]bp |
| Dyscophellus | phraxanorDHJ02 | [8558] | 02-SRNP-2635    | 669[0n]bp |
| Dyscophellus | phraxanorDHJ02 | [8559] | 00-SRNP-1057    | 669[0n]bp |
| Dyscophellus | phraxanorDHJ02 | [8560] | 01-SRNP-1058    | 669[0n]bp |
| Dyscophellus | phraxanorDHJ02 | [8561] | 00-SRNP-12293   | 669[0n]bp |
| Dyscophellus | phraxanorDHJ02 | [8562] | 99-SRNP-13496   | 669[0n]bp |
| Dyscophellus | phraxanorDHJ02 | [8563] | 99-SRNP-13336   | 669[0n]bp |
| Dyscophellus | phraxanorDHJ02 | [8564] | 99-SRNP-13063   | 669[0n]bp |
| Dyscophellus | phraxanorDHJ02 | [8565] | 98-SRNP-15079   | 669[0n]bp |
| Dyscophellus | phraxanorDHJ02 | [8566] | 99-SRNP-12290   | 669[0n]bp |
| Dyscophellus | phraxanorDHJ02 | [8567] | 04-SRNP-34379   | 669[0n]bp |
| Dyscophellus | phraxanorDHJ02 | [8568] | 02-SRNP-481     | 669[0n]bp |
| Dyscophellus | phraxanorDHJ02 | [8569] | 01-SRNP-22947   | 669[0n]bp |
| Dyscophellus | phraxanorDHJ02 | [8570] | 01-SRNP-23370   | 669[0n]bp |
| Dyscophellus | phraxanorDHJ02 | [8571] | 01-SRNP-3488    | 669[0n]bp |
| Dyscophellus | phraxanorDHJ02 | [8572] | 00-SRNP-4520    | 669[0n]bp |
| Dyscophellus | phraxanorDHJ02 | [8573] | 99-SRNP-12028   | 657[0n]bp |
| Dyscophellus | phraxanorDHJ02 | [8574] | 99-SRNP-13339   | 606[0n]bp |
| Dyscophellus | phraxanorDHJ02 | [8575] | 00-SRNP-4195    | 609[1n]bp |
| Dyscophellus | phraxanorDHJ02 | [8576] | 09-SRNP-68551   | 669[0n]bp |
| Dyscophellus | Burns02        | [8577] | 05-SRNP-33035   | 669[0n]bp |
| Dyscophellus | Burns02        | [8578] | 04-SRNP-61423   | 687[0n]bp |
| Dyscophellus | Burns02        | [8579] | 00-SRNP-21086   | 669[0n]bp |
| Dyscophellus | Burns02        | [8580] | 98-SRNP-6071    | 669[0n]bp |
| Dyscophellus | Burns02        | [8581] | 08-SRNP-70869   | 669[0n]bp |
| Dyscophellus | Burns02        | [8582] | 06-SRNP-4389    | 669[0n]bp |
| Dyscophellus | Burns02        | [8583] | 02-SRNP-6754    | 669[0n]bp |
| Dyscophellus | Burns02        | [8584] | 03-SRNP-12963.1 | 669[0n]bp |
| Dyscophellus | Burns02        | [8585] | 04-SRNP-32586   | 630[0n]bp |
| Dyscophellus | Burns02        | [8586] | 06-SRNP-812     | 315[0n]bp |
| Dyscophellus | Burns02        | [8587] | 02-SRNP-7471    | 657[0n]bp |
| Dyscophellus | Burns02        | [8588] | 02-SRNP-6761    | 657[0n]bp |
| Dyscophellus | Burns02        | [8589] | 04-SRNP-41726   | 669[0n]bp |
| Dyscophellus | Burns02        | [8590] | 04-SRNP-3811    | 669[0n]bp |
| Dyscophellus | Burns02        | [8591] | 04-SRNP-41073   | 669[0n]bp |
| Dyscophellus | Burns02        | [8592] | 05-SRNP-40223   | 669[0n]bp |
| Dyscophellus | Burns02        | [8593] | 02-SRNP-7460    | 669[0n]bp |
| Dyscophellus | Burns02        | [8594] | 01-SRNP-468     | 669[0n]bp |
| Dyscophellus | Burns02        | [8595] | 03-SRNP-11903   | 669[0n]bp |
| Dyscophellus | Burns02        | [8596] | 02-SRNP-7467    | 669[0n]bp |

Dyscophellus Burns02|[8594]|01-SRNP-468|669[0n]bp  
 Dyscophellus Burns02|[8595]|03-SRNP-11903|669[0n]bp  
 Dyscophellus Burns02|[8596]|02-SRNP-7467|669[0n]bp  
 Dyscophellus Burns02|[8597]|01-SRNP-5675|669[0n]bp  
 Dyscophellus Burns02|[8598]|06-SRNP-40602|669[0n]bp  
 Dyscophellus Burns02|[8599]|08-SRNP-70835|669[0n]bp  
 Dyscophellus Burns02|[8600]|08-SRNP-65702|669[0n]bp  
 Dyscophellus porcius|[8601]|01-SRNP-5603|630[0n]bp  
 Dyscophellus porcius|[8602]|07-SRNP-42003|669[0n]bp  
 Dyscophellus Burns01|[8603]|08-SRNP-4491|669[0n]bp  
 Dyscophellus Burns01|[8604]|08-SRNP-914|669[1n]bp  
 Dyscophellus Burns01|[8605]|08-SRNP-32137|669[0n]bp  
 Dyscophellus Burns01|[8606]|08-SRNP-70995|669[0n]bp  
 Dyscophellus Burns01|[8607]|08-SRNP-65309|669[0n]bp  
 Dyscophellus Burns01|[8608]|08-SRNP-790|669[0n]bp  
 Dyscophellus Burns01|[8609]|08-SRNP-21088|669[0n]bp  
 Dyscophellus Burns01|[8610]|08-SRNP-21089|669[0n]bp  
 Dyscophellus Burns01|[8611]|07-SRNP-45367|669[0n]bp  
 Dyscophellus Burns01|[8612]|07-SRNP-33600|669[0n]bp  
 Dyscophellus Burns01|[8613]|07-SRNP-2605|669[0n]bp  
 Dyscophellus Burns01|[8614]|07-SRNP-45366|669[0n]bp  
 Dyscophellus Burns01|[8615]|07-SRNP-2606|669[0n]bp  
 Dyscophellus Burns01|[8616]|07-SRNP-1820|669[0n]bp  
 Dyscophellus Burns01|[8617]|07-SRNP-31532|669[0n]bp  
 Dyscophellus Burns01|[8618]|07-SRNP-1821|669[0n]bp  
 Dyscophellus Burns01|[8619]|06-SRNP-4434|669[0n]bp  
 Dyscophellus Burns01|[8620]|06-SRNP-45197|669[0n]bp  
 Dyscophellus Burns01|[8621]|06-SRNP-2566|669[0n]bp  
 Dyscophellus Burns01|[8622]|04-SRNP-1382|669[0n]bp  
 Dyscophellus Burns01|[8623]|04-SRNP-3019|669[0n]bp  
 Dyscophellus Burns01|[8624]|04-SRNP-1472|669[0n]bp  
 Dyscophellus Burns01|[8625]|04-SRNP-1145|669[0n]bp  
 Dyscophellus Burns01|[8626]|04-SRNP-41583|669[0n]bp  
 Dyscophellus Burns01|[8627]|05-SRNP-34746|669[2n]bp  
 Dyscophellus Burns01|[8628]|02-SRNP-17977|645[0n]bp  
 Dyscophellus Burns01|[8629]|03-SRNP-5975|645[0n]bp  
 Dyscophellus Burns01|[8630]|01-SRNP-1161|639[0n]bp  
 Dyscophellus Burns01|[8631]|01-SRNP-22233|639[0n]bp  
 Dyscophellus Burns01|[8632]|07-SRNP-20844|645[0n]bp  
 Dyscophellus Burns01|[8633]|08-SRNP-70860|645[0n]bp  
 Dyscophellus Burns01|[8634]|08-SRNP-21379|669[0n]bp  
 Dyscophellus Burns01|[8635]|08-SRNP-21611|669[0n]bp  
 Dyscophellus Burns01|[8636]|08-SRNP-915|669[0n]bp  
 Dyscophellus Burns01|[8637]|08-SRNP-1071|669[0n]bp  
 Dyscophellus Burns01|[8638]|08-SRNP-32136|669[0n]bp  
 Dyscophellus Burns01|[8639]|09-SRNP-57048|669[0n]bp  
 Dyscophellus Burns01|[8640]|07-SRNP-42747|669[0n]bp  
 Dyscophellus Burns01|[8641]|09-SRNP-67513|669[0n]bp  
 Dyscophellus Burns01|[8642]|06-SRNP-5185|627[0n]bp  
 Dyscophellus Burns01|[8643]|08-SRNP-2351|669[1n]bp  
 Dyscophellus Burns01|[8644]|08-SRNP-70059|669[0n]bp  
 Dyscophellus Burns01|[8645]|08-SRNP-1139|669[0n]bp  
 Dyscophellus Burns01|[8646]|08-SRNP-1140|669[0n]bp  
 Dyscophellus Burns01|[8647]|07-SRNP-46539|669[0n]bp  
 Dyscophellus Burns01|[8648]|07-SRNP-65613|669[0n]bp  
 Dyscophellus Burns01|[8649]|06-SRNP-5990|669[0n]bp  
 Dyscophellus Burns01|[8650]|06-SRNP-31676|669[0n]bp  
 Dyscophellus Burns01|[8651]|06-SRNP-2371|669[0n]bp  
 Dyscophellus Burns01|[8652]|07-SRNP-45716|660[0n]bp  
 Dyscophellus Burns01|[8653]|03-SRNP-1735|528[1n]bp  
 Dyscophellus Burns01|[8654]|06-SRNP-5186|624[0n]bp  
 Dyscophellus Burns01|[8655]|08-SRNP-1423|645[0n]bp  
 Dyscophellus Burns01|[8656]|08-SRNP-1424|645[0n]bp  
 Dyscophellus Burns01|[8657]|08-SRNP-70994|669[0n]bp  
 Dyscophellus Burns01|[8658]|07-SRNP-42565|669[0n]bp  
 Dyscophellus Burns01|[8659]|08-SRNP-40847|669[3n]bp  
 Dyscophellus Burns01|[8660]|07-SRNP-3025|669[0n]bp  
 Dyscophellus Burns01|[8661]|07-SRNP-833|669[0n]bp  
 Dyscophellus Burns01|[8662]|06-SRNP-4432|669[0n]bp  
 Dyscophellus Burns01|[8663]|06-SRNP-4193|669[0n]bp  
 Dyscophellus Burns01|[8664]|04-SRNP-34190|669[0n]bp  
 Dyscophellus Burns01|[8665]|07-SRNP-45717|660[0n]bp  
 Dyscophellus Burns01|[8666]|08-SRNP-1274|669[0n]bp  
 Dyscophellus Burns01|[8667]|08-SRNP-70502|669[0n]bp  
 Dyscophellus Burns01|[8668]|08-SRNP-35933|669[0n]bp  
 Dyscophellus Burns01|[8669]|09-SRNP-68136|669[0n]bp  
 Dyscophellus ramon|[8670]|01-SRNP-3569|669[0n]bp  
 Dyscophellus ramon|[8671]|09-SRNP-40055|669[0n]bp  
 Dyscophellus ramon|[8672]|03-SRNP-5396|654[1n]bp  
 Dyscophellus ramon|[8673]|01-SRNP-25139|669[0n]bp  
 Dyscophellus ramon|[8674]|01-SRNP-1770|669[0n]bp  
 Dyscophellus ramon|[8675]|01-SRNP-22279|669[0n]bp  
 Dyscophellus ramon|[8676]|01-SRNP-5763|669[0n]bp  
 Dyscophellus ramon|[8677]|00-SRNP-12919|669[0n]bp  
 Dyscophellus ramon|[8678]|07-SRNP-60549|669[0n]bp  
 Dyscophellus ramon|[8679]|03-SRNP-5318|630[0n]bp  
 Dyscophellus ramon|[8680]|01-SRNP-24190|630[1n]bp  
 Dyscophellus ramon|[8681]|08-SRNP-1584|669[1n]bp  
 Dyscophellus ramon|[8682]|08-SRNP-71274|666[0n]bp  
 Dyscophellus ramon|[8683]|03-SRNP-30935|669[0n]bp  
 Dyscophellus ramon|[8684]|02-SRNP-169|669[0n]bp  
 Dyscophellus ramon|[8685]|08-SRNP-24064|633[0n]bp  
 Dyscophellus ramon|[8686]|06-SRNP-370|669[0n]bp  
 Dyscophellus ramon|[8687]|08-SRNP-24061|636[0n]bp  
 Dyscophellus ramon|[8688]|08-SRNP-24063|669[0n]bp  
 Dyscophellus ramon|[8689]|03-SRNP-30164|669[0n]bp  
 Dyscophellus ramon|[8690]|00-SRNP-21755|669[0n]bp  
 Dyscophellus ramon|[8691]|02-SRNP-18736|669[0n]bp  
 Dyscophellus ramon|[8692]|02-SRNP-1636|669[0n]bp  
 Dyscophellus ramon|[8693]|02-SRNP-4089|669[0n]bp  
 Dyscophellus ramon|[8694]|07-SRNP-20011|669[0n]bp  
 Dyscophellus ramon|[8695]|05-SRNP-42006|669[0n]bp  
 Dyscophellus ramon|[8696]|07-SRNP-41237|669[0n]bp



|                         |        |               |           |
|-------------------------|--------|---------------|-----------|
| Dyscophellus ramon      | [8694] | 07-SRNP-20011 | 669[0n]bp |
| Dyscophellus ramon      | [8695] | 05-SRNP-42006 | 669[0n]bp |
| Dyscophellus ramon      | [8696] | 07-SRNP-41237 | 669[0n]bp |
| Dyscophellus ramon      | [8697] | 07-SRNP-45229 | 669[0n]bp |
| Dyscophellus ramon      | [8698] | 08-SRNP-4118  | 669[0n]bp |
| Dyscophellus ramon      | [8699] | 02-SRNP-33929 | 669[0n]bp |
| Dyscophellus ramon      | [8700] | 01-SRNP-22278 | 669[0n]bp |
| Dyscophellus ramon      | [8701] | 02-SRNP-20433 | 669[0n]bp |
| Dyscophellus ramon      | [8702] | 00-SRNP-22195 | 669[0n]bp |
| Dyscophellus ramon      | [8703] | 02-SRNP-7461  | 669[0n]bp |
| Dyscophellus ramon      | [8704] | 02-SRNP-7470  | 669[0n]bp |
| Dyscophellus ramon      | [8705] | 01-SRNP-22392 | 669[0n]bp |
| Dyscophellus ramon      | [8706] | 02-SRNP-3214  | 669[0n]bp |
| Dyscophellus ramon      | [8707] | 01-SRNP-3012  | 669[0n]bp |
| Dyscophellus ramon      | [8708] | 01-SRNP-25138 | 669[0n]bp |
| Dyscophellus ramon      | [8709] | 02-SRNP-7463  | 669[0n]bp |
| Dyscophellus ramon      | [8710] | 02-SRNP-7117  | 669[0n]bp |
| Dyscophellus ramon      | [8711] | 00-SRNP-11389 | 669[0n]bp |
| Dyscophellus ramon      | [8712] | 02-SRNP-20419 | 669[0n]bp |
| Dyscophellus ramon      | [8713] | 02-SRNP-19579 | 669[0n]bp |
| Dyscophellus ramon      | [8714] | 01-SRNP-22456 | 669[0n]bp |
| Dyscophellus ramon      | [8715] | 06-SRNP-77    | 669[0n]bp |
| Dyscophellus ramon      | [8716] | 04-SRNP-60594 | 669[0n]bp |
| Dyscophellus ramon      | [8717] | 04-SRNP-3520  | 669[0n]bp |
| Dyscophellus ramon      | [8718] | 03-SRNP-5316  | 669[0n]bp |
| Dyscophellus ramon      | [8719] | 02-SRNP-1606  | 669[0n]bp |
| Dyscophellus ramon      | [8720] | 97-SRNP-6149  | 666[0n]bp |
| Dyscophellus ramon      | [8721] | 01-SRNP-11993 | 654[0n]bp |
| Dyscophellus ramon      | [8722] | 08-SRNP-4781  | 645[0n]bp |
| Dyscophellus ramon      | [8723] | 08-SRNP-23241 | 624[0n]bp |
| Dyscophellus ramon      | [8724] | 08-SRNP-58183 | 669[0n]bp |
| Dyscophellus ramon      | [8725] | 09-SRNP-67984 | 669[0n]bp |
| Phareas coeleste        | [8726] | 02-SRNP-35232 | 540[0n]bp |
| Phareas coeleste        | [8727] | 02-SRNP-35231 | 576[0n]bp |
| Phareas coeleste        | [8728] | 04-SRNP-56226 | 669[0n]bp |
| Phareas coeleste        | [8729] | 05-SRNP-30644 | 669[0n]bp |
| Phareas coeleste        | [8730] | 05-SRNP-30576 | 669[0n]bp |
| Phareas coeleste        | [8731] | 05-SRNP-30642 | 669[0n]bp |
| Phareas coeleste        | [8732] | 05-SRNP-30469 | 669[0n]bp |
| Phareas coeleste        | [8733] | 05-SRNP-30643 | 669[0n]bp |
| Phareas coeleste        | [8734] | 05-SRNP-30577 | 669[0n]bp |
| Phocides belus          | [8735] | 06-SRNP-55175 | 642[0n]bp |
| Phocides belus          | [8736] | 06-SRNP-55419 | 642[0n]bp |
| Phocides belus          | [8737] | 02-SRNP-10072 | 663[0n]bp |
| Phocides belus          | [8738] | 06-SRNP-55185 | 669[0n]bp |
| Phocides belus          | [8739] | 96-SRNP-51    | 612[0n]bp |
| Phocides belus          | [8740] | 01-SRNP-18748 | 669[0n]bp |
| Phocides belus          | [8741] | 96-SRNP-12439 | 669[0n]bp |
| Phocides belus          | [8742] | 96-SRNP-12538 | 669[0n]bp |
| Phocides belus          | [8743] | 96-SRNP-12436 | 669[0n]bp |
| Phocides belus          | [8744] | 07-SRNP-55324 | 669[0n]bp |
| Phocides belus          | [8745] | 07-SRNP-55469 | 669[0n]bp |
| Phocides belus          | [8746] | 06-SRNP-55343 | 669[0n]bp |
| Phocides belus          | [8747] | 01-SRNP-17031 | 669[0n]bp |
| Phocides belus          | [8748] | 07-SRNP-56444 | 669[0n]bp |
| Phocides belus          | [8749] | 96-SRNP-12539 | 630[0n]bp |
| Phocides Warren01       | [8750] | 00-SRNP-15104 | 639[0n]bp |
| Phocides Warren01       | [8751] | 00-SRNP-15731 | 639[0n]bp |
| Phocides Warren01       | [8752] | 01-SRNP-17035 | 645[0n]bp |
| Phocides Warren01       | [8753] | 00-SRNP-8936  | 645[0n]bp |
| Phocides Warren01       | [8754] | 00-SRNP-15124 | 594[0n]bp |
| Phocides Warren01       | [8755] | 00-SRNP-8940  | 669[0n]bp |
| Phocides Warren01       | [8756] | 00-SRNP-15109 | 669[0n]bp |
| Phocides Warren01       | [8757] | 00-SRNP-15096 | 669[0n]bp |
| Phocides Warren01       | [8758] | 00-SRNP-15097 | 669[0n]bp |
| Phocides Warren01       | [8759] | 00-SRNP-15177 | 669[0n]bp |
| Phocides Warren01       | [8760] | 00-SRNP-15103 | 669[0n]bp |
| Phocides Warren01       | [8761] | 01-SRNP-17848 | 669[0n]bp |
| Phocides Warren01       | [8762] | 00-SRNP-15187 | 669[0n]bp |
| Phocides Warren01       | [8763] | 00-SRNP-15115 | 669[0n]bp |
| Phocides Warren01       | [8764] | 01-SRNP-16953 | 669[0n]bp |
| Phocides Warren01       | [8765] | 00-SRNP-15106 | 669[0n]bp |
| Phocides Warren01       | [8766] | 00-SRNP-15221 | 669[0n]bp |
| Phocides Warren01       | [8767] | 00-SRNP-15114 | 669[0n]bp |
| Phocides Warren01       | [8768] | 00-SRNP-15894 | 669[0n]bp |
| Phocides Warren01       | [8769] | 00-SRNP-15110 | 669[0n]bp |
| Phocides Warren01       | [8770] | 01-SRNP-16950 | 669[0n]bp |
| Phocides Warren01       | [8771] | 00-SRNP-15186 | 669[0n]bp |
| Phocides pigmalionDHJ01 | [8772] | 95-SRNP-7824  | 570[0n]bp |
| Phocides pigmalionDHJ01 | [8773] | 00-SRNP-4542  | 567[0n]bp |
| Phocides Warren01       | [8774] | 00-SRNP-15238 | 576[0n]bp |
| Phocides pigmalionDHJ01 | [8775] | 02-SRNP-14336 | 576[0n]bp |
| Phocides pigmalionDHJ01 | [8776] | 02-SRNP-14447 | 669[0n]bp |
| Phocides pigmalionDHJ01 | [8777] | 00-SRNP-16167 | 669[0n]bp |
| Phocides pigmalionDHJ01 | [8778] | 96-SRNP-9016  | 669[0n]bp |
| Phocides pigmalionDHJ01 | [8779] | 00-SRNP-4322  | 669[0n]bp |
| Phocides pigmalionDHJ01 | [8780] | 96-SRNP-9017  | 669[0n]bp |
| Phocides pigmalionDHJ01 | [8781] | 96-SRNP-9015  | 669[0n]bp |
| Phocides pigmalionDHJ01 | [8782] | 04-SRNP-14106 | 669[0n]bp |
| Phocides pigmalionDHJ01 | [8783] | 05-SRNP-61368 | 669[0n]bp |
| Phocides pigmalionDHJ01 | [8784] | 07-SRNP-42344 | 669[0n]bp |
| Phocides pigmalionDHJ01 | [8785] | 07-SRNP-42389 | 669[0n]bp |
| Phocides pigmalionDHJ01 | [8786] | 07-SRNP-42343 | 669[0n]bp |
| Phocides pigmalionDHJ01 | [8787] | 07-SRNP-42390 | 669[0n]bp |
| Phocides pigmalionDHJ01 | [8788] | 08-SRNP-55462 | 669[0n]bp |
| Phocides pigmalionDHJ01 | [8789] | 08-SRNP-5779  | 669[0n]bp |
| Phocides belus          | [8790] | 05-SRNP-64113 | 633[0n]bp |
| Phocides belus          | [8791] | 06-SRNP-60076 | 609[0n]bp |
| Phocides pigmalionDHJ01 | [8792] | 05-SRNP-6300  | 627[0n]bp |
| Phocides pigmalionDHJ01 | [8793] | 00-SRNP-4541  | 639[0n]bp |
| Phocides pigmalionDHJ01 | [8794] | 99-SRNP-16188 | 639[0n]bp |
| Phocides pigmalionDHJ01 | [8795] | 06-SRNP-60042 | 606[0n]bp |
| Phocides Warren01       | [8796] | 00-SRNP-15726 | 642[0n]bp |

Phocides pigmalionDHJ01|[8794]|99-SRNP-16188|639[0n]bp  
 Phocides pigmalionDHJ01|[8795]|06-SRNP-60042|606[0n]bp  
 Phocides Warren01|[8796]|00-SRNP-15726|642[0n]bp  
 Phocides belus|[8797]|06-SRNP-59670|597[0n]bp  
 Phocides belus|[8798]|05-SRNP-66416|669[1n]bp  
 Phocides belus|[8799]|05-SRNP-66414|669[0n]bp  
 Phocides belus|[8800]|06-SRNP-55154|669[1n]bp  
 Phocides belus|[8801]|96-SRNP-12435.1|669[0n]bp  
 Phocides belus|[8802]|99-SRNP-8611|669[0n]bp  
 Phocides belus|[8803]|06-SRNP-60276|615[1n]bp  
 Phocides belus|[8804]|01-SRNP-18749|648[0n]bp  
 Phocides belus|[8805]|94-SRNP-7489|645[0n]bp  
 Phocides belus|[8806]|01-SRNP-17030|600[0n]bp  
 Phocides belus|[8807]|05-SRNP-55231|669[0n]bp  
 Phocides belus|[8808]|07-SRNP-55795|669[0n]bp  
 Phocides belus|[8809]|07-SRNP-55340|669[0n]bp  
 Phocides belus|[8810]|07-SRNP-55373|669[0n]bp  
 Phocides belus|[8811]|00-SRNP-20234|573[0n]bp  
 Phocides belus|[8812]|00-SRNP-20231|669[0n]bp  
 Phocides belus|[8813]|96-SRNP-12432|669[0n]bp  
 Phocides belus|[8814]|07-SRNP-55377|669[0n]bp  
 Phocides belus|[8815]|96-SRNP-9221|669[0n]bp  
 Phocides belus|[8816]|97-SRNP-248|669[0n]bp  
 Phocides belus|[8817]|00-SRNP-3582|669[0n]bp  
 Phocides belus|[8818]|93-SRNP-6630|669[0n]bp  
 Phocides Warren01|[8819]|00-SRNP-15102|669[0n]bp  
 Phocides Warren01|[8820]|00-SRNP-15185|669[0n]bp  
 Phocides Warren01|[8821]|00-SRNP-15194|669[0n]bp  
 Phocides Warren01|[8822]|00-SRNP-15236|669[0n]bp  
 Phocides belus|[8823]|06-SRNP-55176|669[0n]bp  
 Phocides belus|[8824]|06-SRNP-55418|669[0n]bp  
 Phocides belus|[8825]|05-SRNP-55233|669[0n]bp  
 Phocides belus|[8826]|05-SRNP-55235|669[0n]bp  
 Phocides belus|[8827]|06-SRNP-55173|669[1n]bp  
 Phocides belus|[8828]|05-SRNP-66417|669[2n]bp  
 Phocides belus|[8829]|08-SRNP-55675|669[0n]bp  
 Phocides belus|[8830]|09-SRNP-55421|642[0n]bp  
 Phocides pigmalionDHJ02|[8831]|06-SRNP-34234|663[0n]bp  
 Phocides pigmalionDHJ02|[8832]|06-SRNP-44090|615[0n]bp  
 Phocides pigmalionDHJ02|[8833]|08-SRNP-41365|669[0n]bp  
 Phocides pigmalionDHJ02|[8834]|08-SRNP-41366|669[0n]bp  
 Phocides pigmalionDHJ02|[8835]|07-SRNP-42096|669[0n]bp  
 Phocides pigmalionDHJ02|[8836]|07-SRNP-42095|669[0n]bp  
 Phocides pigmalionDHJ02|[8837]|07-SRNP-943|669[0n]bp  
 Phocides pigmalionDHJ02|[8838]|07-SRNP-1304|669[0n]bp  
 Phocides pigmalionDHJ02|[8839]|07-SRNP-1303|669[0n]bp  
 Phocides pigmalionDHJ02|[8840]|06-SRNP-34235|669[0n]bp  
 Phocides pigmalionDHJ02|[8841]|06-SRNP-43725|669[0n]bp  
 Phocides pigmalionDHJ02|[8842]|06-SRNP-43751|669[0n]bp  
 Phocides pigmalionDHJ02|[8843]|06-SRNP-34232|669[0n]bp  
 Phocides pigmalionDHJ02|[8844]|06-SRNP-34233|669[0n]bp  
 Phocides pigmalionDHJ02|[8845]|06-SRNP-41789|669[0n]bp  
 Phocides pigmalionDHJ02|[8846]|00-SRNP-11147|669[0n]bp  
 Phocides pigmalionDHJ02|[8847]|00-SRNP-12628|669[0n]bp  
 Phocides pigmalionDHJ02|[8848]|08-SRNP-66135|669[0n]bp  
 Phocides pigmalionDHJ02|[8849]|09-SRNP-21125|669[0n]bp  
 Phocides Burns01|[8850]|05-SRNP-41960|669[0n]bp  
 Phocides Burns01|[8851]|05-SRNP-2576|669[0n]bp  
 Phocides Burns01|[8852]|04-SRNP-40653|669[0n]bp  
 Phocides Burns01|[8853]|06-SRNP-42438|630[0n]bp  
 Phocides Burns01|[8854]|06-SRNP-42881|669[0n]bp  
 Phocides lilea|[8855]|02-SRNP-4215|645[1n]bp  
 Phocides lilea|[8856]|05-SRNP-36020|642[0n]bp  
 Phocides lilea|[8857]|02-SRNP-4582|642[1n]bp  
 Phocides lilea|[8858]|07-SRNP-45148|669[0n]bp  
 Phocides lilea|[8859]|06-SRNP-55337|603[0n]bp  
 Phocides lilea|[8860]|08-SRNP-45148|669[0n]bp  
 Phocides lilea|[8861]|08-SRNP-55012|669[0n]bp  
 Phocides lilea|[8862]|06-SRNP-36875|669[0n]bp  
 Phocides lilea|[8863]|07-SRNP-1991|669[0n]bp  
 Phocides lilea|[8864]|05-SRNP-45014|669[0n]bp  
 Phocides lilea|[8865]|05-SRNP-45013|669[0n]bp  
 Phocides lilea|[8866]|05-SRNP-45012|669[0n]bp  
 Phocides lilea|[8867]|05-SRNP-55954|669[0n]bp  
 Phocides lilea|[8868]|05-SRNP-31874|669[0n]bp  
 Phocides lilea|[8869]|05-SRNP-42094|669[0n]bp  
 Phocides lilea|[8870]|04-SRNP-48827|669[0n]bp  
 Phocides lilea|[8871]|04-SRNP-22905|669[0n]bp  
 Phocides lilea|[8872]|04-SRNP-49744|669[0n]bp  
 Phocides lilea|[8873]|06-SRNP-55641|669[2n]bp  
 Phocides lilea|[8874]|05-SRNP-64067|669[0n]bp  
 Phocides lilea|[8875]|06-SRNP-12035|669[0n]bp  
 Phocides lilea|[8876]|05-SRNP-64081|669[0n]bp  
 Phocides lilea|[8877]|05-SRNP-64071|669[0n]bp  
 Phocides lilea|[8878]|06-SRNP-12616|669[0n]bp  
 Phocides lilea|[8879]|05-SRNP-64077|669[0n]bp  
 Phocides lilea|[8880]|07-SRNP-56871|669[0n]bp  
 Phocides lilea|[8881]|08-SRNP-1660|669[0n]bp  
 Phocides lilea|[8882]|08-SRNP-70870|669[0n]bp  
 Phocides lilea|[8883]|07-SRNP-43071|669[0n]bp  
 Phocides lilea|[8884]|08-SRNP-45036|669[0n]bp  
 Phocides lilea|[8885]|08-SRNP-72107|669[0n]bp  
 Phocides lilea|[8886]|08-SRNP-71270|669[0n]bp  
 Phocides lilea|[8887]|08-SRNP-71658|669[0n]bp  
 Phocides lilea|[8888]|08-SRNP-72658|669[0n]bp  
 Phocides lilea|[8889]|08-SRNP-37041|669[0n]bp  
 Phocides nigrescens|[8890]|02-SRNP-24513|642[0n]bp  
 Phocides nigrescens|[8891]|03-SRNP-1248|639[0n]bp  
 Phocides nigrescens|[8892]|09-SRNP-20813|669[1n]bp  
 Phocides nigrescens|[8893]|06-SRNP-6937|654[0n]bp  
 Phocides nigrescens|[8894]|06-SRNP-9777|669[0n]bp  
 Phocides nigrescens|[8895]|07-SRNP-60225|669[0n]bp  
 Phocides nigrescens|[8896]|08-SRNP-30726|669[0n]bp

Phocides nigrescens [8894] | 06-SRNP-9777 | 669 [0n]bp  
 Phocides nigrescens [8895] | 07-SRNP-60225 | 669 [0n]bp  
 Phocides nigrescens [8896] | 08-SRNP-30726 | 669 [0n]bp  
 Phocides nigrescens [8897] | 08-SRNP-30757 | 669 [0n]bp  
 Phocides nigrescens [8898] | 07-SRNP-1654 | 669 [0n]bp  
 Phocides nigrescens [8899] | 07-SRNP-1584 | 669 [0n]bp  
 Phocides nigrescens [8900] | 07-SRNP-1585 | 669 [0n]bp  
 Phocides nigrescens [8901] | 07-SRNP-1599 | 669 [0n]bp  
 Phocides nigrescens [8902] | 07-SRNP-3394 | 669 [0n]bp  
 Phocides nigrescens [8903] | 07-SRNP-45870 | 669 [0n]bp  
 Phocides nigrescens [8904] | 08-SRNP-1566 | 669 [0n]bp  
 Phocides nigrescens [8905] | 08-SRNP-30756 | 669 [0n]bp  
 Phocides nigrescens [8906] | 08-SRNP-2469 | 669 [0n]bp  
 Phocides nigrescens [8907] | 08-SRNP-23739 | 669 [0n]bp  
 Phocides nigrescens [8908] | 09-SRNP-20870 | 669 [0n]bp  
 Phocides nigrescens [8909] | 09-SRNP-80647 | 669 [0n]bp  
 Phocides nigrescens [8910] | 08-SRNP-33055 | 669 [0n]bp  
 Phocides nigrescens [8911] | 08-SRNP-6886 | 669 [0n]bp  
 Phocides nigrescens [8912] | 06-SRNP-4789 | 669 [0n]bp  
 Phocides nigrescens [8913] | 07-SRNP-1656 | 669 [0n]bp  
 Phocides nigrescens [8914] | 06-SRNP-4244 | 669 [0n]bp  
 Phocides nigrescens [8915] | 06-SRNP-6938 | 669 [0n]bp  
 Phocides nigrescens [8916] | 06-SRNP-7174 | 669 [0n]bp  
 Phocides nigrescens [8917] | 06-SRNP-6010 | 669 [0n]bp  
 Phocides nigrescens [8918] | 06-SRNP-6017 | 669 [0n]bp  
 Phocides nigrescens [8919] | 06-SRNP-6172 | 669 [0n]bp  
 Phocides nigrescens [8920] | 06-SRNP-6612 | 669 [0n]bp  
 Phocides nigrescens [8921] | 06-SRNP-23407 | 669 [0n]bp  
 Phocides nigrescens [8922] | 06-SRNP-4060 | 669 [0n]bp  
 Phocides nigrescens [8923] | 05-SRNP-7497 | 669 [0n]bp  
 Phocides nigrescens [8924] | 06-SRNP-2402 | 669 [0n]bp  
 Phocides nigrescens [8925] | 05-SRNP-7669 | 669 [0n]bp  
 Phocides nigrescens [8926] | 05-SRNP-31898 | 669 [0n]bp  
 Phocides nigrescens [8927] | 05-SRNP-21431 | 669 [0n]bp  
 Phocides nigrescens [8928] | 05-SRNP-3478 | 669 [0n]bp  
 Phocides nigrescens [8929] | 05-SRNP-2553 | 669 [0n]bp  
 Phocides nigrescens [8930] | 04-SRNP-35496 | 669 [0n]bp  
 Phocides nigrescens [8931] | 04-SRNP-3410 | 669 [0n]bp  
 Phocides nigrescens [8932] | 04-SRNP-23796 | 669 [0n]bp  
 Phocides nigrescens [8933] | 04-SRNP-4780 | 669 [0n]bp  
 Phocides nigrescens [8934] | 04-SRNP-35586 | 669 [0n]bp  
 Phocides nigrescens [8935] | 06-SRNP-6936 | 648 [0n]bp  
 Phocides nigrescens [8936] | 06-SRNP-9333 | 651 [2n]bp  
 Phocides nigrescens [8937] | 09-SRNP-21126 | 669 [0n]bp  
 Nascus phintias [8938] | 05-SRNP-2410 | 669 [0n]bp  
 Nascus phintias [8939] | 07-SRNP-2575 | 669 [0n]bp  
 Nascus phintias [8940] | 02-SRNP-3373 | 645 [0n]bp  
 Nascus phintias [8941] | 05-SRNP-2034 | 687 [0n]bp  
 Nascus phintias [8942] | 05-SRNP-43646 | 669 [0n]bp  
 Nascus phintias [8943] | 07-SRNP-35296 | 669 [0n]bp  
 Nascus phintias [8944] | 05-SRNP-47456 | 669 [0n]bp  
 Nascus phintias [8945] | 05-SRNP-3879 | 669 [0n]bp  
 Nascus phintias [8946] | 05-SRNP-40848 | 669 [0n]bp  
 Nascus phintias [8947] | 05-SRNP-2532 | 669 [0n]bp  
 Nascus phintias [8948] | 05-SRNP-2535 | 669 [0n]bp  
 Nascus phintias [8949] | 04-SRNP-2156 | 669 [0n]bp  
 Nascus phintias [8950] | 02-SRNP-3469 | 669 [0n]bp  
 Nascus phintias [8951] | 07-SRNP-36387 | 633 [0n]bp  
 Nascus phintias [8952] | 08-SRNP-31018 | 669 [0n]bp  
 Nascus Burns01 [8953] | 04-SRNP-60540 | 669 [0n]bp  
 Nascus Burns01 [8954] | 02-SRNP-135 | 591 [0n]bp  
 Nascus Burns01 [8955] | 00-SRNP-1575 | 528 [0n]bp  
 Nascus Burns01 [8956] | 04-SRNP-14201 | 630 [0n]bp  
 Nascus Burns01 [8957] | 08-SRNP-14631 | 669 [0n]bp  
 Nascus Burns01 [8958] | 05-SRNP-47006 | 669 [0n]bp  
 Nascus Burns01 [8959] | 05-SRNP-47054 | 669 [0n]bp  
 Nascus Burns01 [8960] | 05-SRNP-47007 | 669 [0n]bp  
 Nascus Burns01 [8961] | 98-SRNP-15119 | 636 [2n]bp  
 Nascus Burns01 [8962] | 07-SRNP-23590 | 621 [0n]bp  
 Nascus Burns01 [8963] | 04-SRNP-2064 | 609 [1n]bp  
 Nascus Burns01 [8964] | 96-SRNP-12541 | 624 [0n]bp  
 Nascus Burns01 [8965] | 98-SRNP-15121 | 624 [0n]bp  
 Nascus Burns01 [8966] | 06-SRNP-47760 | 594 [0n]bp  
 Nascus Burns01 [8967] | 08-SRNP-6958 | 660 [0n]bp  
 Nascus Burns01 [8968] | 08-SRNP-6946 | 660 [0n]bp  
 Nascus Burns02 [8969] | 07-SRNP-45185 | 669 [0n]bp  
 Nascus Burns02 [8970] | 02-SRNP-5385 | 630 [0n]bp  
 Nascus Burns02 [8971] | 96-SRNP-7368 | 669 [0n]bp  
 Nascus Burns02 [8972] | 02-SRNP-2085 | 594 [0n]bp  
 Nascus Burns02 [8973] | 02-SRNP-5744 | 600 [0n]bp  
 Nascus Burns02 [8974] | 04-SRNP-45037 | 669 [0n]bp  
 Nascus Burns02 [8975] | 04-SRNP-48523 | 669 [0n]bp  
 Nascus Burns02 [8976] | 04-SRNP-23315 | 669 [0n]bp  
 Nascus Burns02 [8977] | 04-SRNP-21643 | 669 [0n]bp  
 Nascus Burns02 [8978] | 04-SRNP-21927 | 669 [0n]bp  
 Nascus Burns02 [8979] | 04-SRNP-47932 | 669 [0n]bp  
 Nascus Burns02 [8980] | 04-SRNP-47541 | 669 [0n]bp  
 Nascus Burns02 [8981] | 04-SRNP-48314 | 669 [0n]bp  
 Nascus Burns02 [8982] | 04-SRNP-48044 | 669 [0n]bp  
 Nascus Burns02 [8983] | 04-SRNP-48045 | 669 [0n]bp  
 Nascus Burns02 [8984] | 04-SRNP-47542 | 669 [0n]bp  
 Nascus Burns02 [8985] | 04-SRNP-11980 | 669 [0n]bp  
 Nascus Burns02 [8986] | 06-SRNP-21092 | 669 [0n]bp  
 Nascus Burns02 [8987] | 06-SRNP-3613 | 669 [0n]bp  
 Nascus Burns02 [8988] | 06-SRNP-58211 | 669 [0n]bp  
 Nascus Burns02 [8989] | 06-SRNP-59675 | 669 [0n]bp  
 Nascus Burns02 [8990] | 06-SRNP-47830 | 669 [0n]bp  
 Nascus Burns02 [8991] | 06-SRNP-59883 | 669 [0n]bp  
 Nascus Burns02 [8992] | 06-SRNP-59658 | 669 [0n]bp  
 Nascus Burns02 [8993] | 07-SRNP-60000 | 669 [0n]bp  
 Nascus Burns02 [8994] | 08-SRNP-1817 | 669 [0n]bp  
 Nascus Burns02 [8995] | 07-SRNP-65044 | 669 [0n]bp  
 Nascus Burns02 [8996] | 08-SRNP-22926 | 669 [0n]bp

Nascus Burns02|[8994]|08-SRNP-1817|669[0n]bp  
 Nascus Burns02|[8995]|07-SRNP-65044|669[0n]bp  
 Nascus Burns02|[8996]|08-SRNP-22926|669[0n]bp  
 Nascus Burns02|[8997]|09-SRNP-44171|669[0n]bp  
 Nascus broteas|[8998]|07-SRNP-58744|642[0n]bp  
 Nascus broteas|[8999]|07-SRNP-65708|642[0n]bp  
 Nascus broteas|[9000]|07-SRNP-45315|642[0n]bp  
 Nascus broteas|[9001]|07-SRNP-45363|642[0n]bp  
 Nascus broteas|[9002]|07-SRNP-65709|633[0n]bp  
 Nascus broteas|[9003]|07-SRNP-20402|654[0n]bp  
 Nascus broteas|[9004]|07-SRNP-65689|651[0n]bp  
 Nascus broteas|[9005]|05-SRNP-47047|687[0n]bp  
 Nascus broteas|[9006]|08-SRNP-66188|669[0n]bp  
 Nascus broteas|[9007]|09-SRNP-57232|669[0n]bp  
 Nascus broteas|[9008]|08-SRNP-66059|669[0n]bp  
 Nascus broteas|[9009]|08-SRNP-66039|669[0n]bp  
 Nascus broteas|[9010]|08-SRNP-22159|669[0n]bp  
 Nascus broteas|[9011]|08-SRNP-32159|669[0n]bp  
 Nascus broteas|[9012]|07-SRNP-58175|669[0n]bp  
 Nascus broteas|[9013]|07-SRNP-35984|669[0n]bp  
 Nascus broteas|[9014]|09-SRNP-20230|669[0n]bp  
 Nascus broteas|[9015]|08-SRNP-6161|669[0n]bp  
 Nascus broteas|[9016]|08-SRNP-66029|669[0n]bp  
 Nascus broteas|[9017]|08-SRNP-66038|669[0n]bp  
 Nascus broteas|[9018]|07-SRNP-32448|669[0n]bp  
 Nascus broteas|[9019]|07-SRNP-36061|669[0n]bp  
 Nascus broteas|[9020]|05-SRNP-2095|669[0n]bp  
 Nascus broteas|[9021]|05-SRNP-5955|669[0n]bp  
 Nascus broteas|[9022]|05-SRNP-2780|669[0n]bp  
 Nascus broteas|[9023]|05-SRNP-3276|669[0n]bp  
 Nascus broteas|[9024]|05-SRNP-887|669[0n]bp  
 Nascus broteas|[9025]|05-SRNP-47048|669[0n]bp  
 Nascus broteas|[9026]|04-SRNP-46661|669[0n]bp  
 Nascus broteas|[9027]|03-SRNP-37108|669[0n]bp  
 Nascus broteas|[9028]|01-SRNP-7365|663[0n]bp  
 Nascus broteas|[9029]|02-SRNP-9577|663[0n]bp  
 Nascus broteas|[9030]|05-SRNP-47061|669[2n]bp  
 Nascus broteas|[9031]|05-SRNP-30597|669[1n]bp  
 Nascus broteas|[9032]|06-SRNP-1723|669[0n]bp  
 Nascus broteas|[9033]|09-SRNP-80142|669[0n]bp  
 Nascus solon|[9034]|94-SRNP-4830|627[0n]bp  
 Nascus solon|[9035]|05-SRNP-55806|687[0n]bp  
 Nascus solon|[9036]|04-SRNP-50064|669[0n]bp  
 Nascus solon|[9037]|05-SRNP-46699|669[0n]bp  
 Nascus solon|[9038]|05-SRNP-705|669[0n]bp  
 Nascus solon|[9039]|05-SRNP-58399|669[0n]bp  
 Nascus solon|[9040]|05-SRNP-2536|669[0n]bp  
 Nascus solon|[9041]|05-SRNP-46952|669[0n]bp  
 Nascus solon|[9042]|05-SRNP-30650|669[0n]bp  
 Nascus solon|[9043]|04-SRNP-49682|669[0n]bp  
 Nascus solon|[9044]|04-SRNP-45029|669[0n]bp  
 Nascus solon|[9045]|04-SRNP-35293|669[0n]bp  
 Nascus solon|[9046]|04-SRNP-49716|669[0n]bp  
 Nascus solon|[9047]|04-SRNP-49717|669[0n]bp  
 Nascus solon|[9048]|04-SRNP-49681|669[0n]bp  
 Nascus solon|[9049]|04-SRNP-49777|669[0n]bp  
 Nascus solon|[9050]|04-SRNP-49768|669[0n]bp  
 Nascus solon|[9051]|04-SRNP-49335|669[0n]bp  
 Nascus solon|[9052]|04-SRNP-49680|669[0n]bp  
 Nascus solon|[9053]|02-SRNP-168|669[0n]bp  
 Nascus solon|[9054]|01-SRNP-597|663[0n]bp  
 Nascus solon|[9055]|04-SRNP-49336|627[0n]bp  
 Nascus solon|[9056]|04-SRNP-49775|363[0n]bp  
 Nascus solon|[9057]|06-SRNP-59999|642[1n]bp  
 Nascus solon|[9058]|05-SRNP-25375|669[0n]bp  
 Nascus solon|[9059]|05-SRNP-47450|669[0n]bp  
 Nascus solon|[9060]|07-SRNP-21820|669[0n]bp  
 Nascus solon|[9061]|07-SRNP-45627|669[0n]bp  
 Nascus solon|[9062]|08-SRNP-55518|669[0n]bp  
 Nascus solon|[9063]|08-SRNP-21263|669[0n]bp  
 Nascus solon|[9064]|07-SRNP-61336|669[0n]bp  
 Nascus solon|[9065]|08-SRNP-21932|669[0n]bp  
 Nascus solon|[9066]|09-SRNP-57395|669[0n]bp  
 Drephalys alcmon|[9067]|01-SRNP-9223|669[0n]bp  
 Drephalys alcmon|[9068]|99-SRNP-2617|633[0n]bp  
 Drephalys alcmon|[9069]|97-SRNP-4047|633[1n]bp  
 Drephalys alcmon|[9070]|99-SRNP-2188|645[0n]bp  
 Drephalys alcmon|[9071]|01-SRNP-9331|639[0n]bp  
 Drephalys alcmon|[9072]|97-SRNP-4150|657[0n]bp  
 Drephalys alcmon|[9073]|02-SRNP-29274|669[0n]bp  
 Drephalys alcmon|[9074]|02-SRNP-4202|669[0n]bp  
 Drephalys alcmon|[9075]|99-SRNP-2646|669[0n]bp  
 Drephalys alcmon|[9076]|98-SRNP-4184|669[0n]bp  
 Drephalys alcmon|[9077]|00-SRNP-2692|669[0n]bp  
 Drephalys Burns01|[9078]|05-SRNP-70289|567[0n]bp  
 Drephalys Burns01|[9079]|06-SRNP-5699|666[0n]bp  
 Drephalys Burns01|[9080]|07-SRNP-42336|669[0n]bp  
 Drephalys Burns01|[9081]|06-SRNP-42502|669[0n]bp  
 Drephalys Burns01|[9082]|06-SRNP-42807|669[0n]bp  
 Drephalys Burns01|[9083]|05-SRNP-31284|669[0n]bp  
 Drephalys Burns01|[9084]|05-SRNP-43718|669[0n]bp  
 Drephalys Burns01|[9085]|05-SRNP-34501|669[0n]bp  
 Drephalys Burns01|[9086]|05-SRNP-41556|669[0n]bp  
 Drephalys Burns01|[9087]|05-SRNP-41680|669[0n]bp  
 Drephalys Burns01|[9088]|05-SRNP-41447|669[0n]bp  
 Drephalys Burns01|[9089]|05-SRNP-41557|639[0n]bp  
 Drephalys Burns01|[9090]|03-SRNP-21317|645[0n]bp  
 Drephalys Burns01|[9091]|06-SRNP-30793|411[0n]bp  
 Drephalys Burns01|[9092]|06-SRNP-42501|654[1n]bp  
 Drephalys Burns01|[9093]|07-SRNP-41814|657[0n]bp  
 Drephalys Burns01|[9094]|08-SRNP-345|669[0n]bp  
 Drephalys Burns01|[9095]|08-SRNP-41486|669[0n]bp  
 Drephalys Burns01|[9096]|08-SRNP-71839|669[0n]bp

```

Drephalys Burns01|[9094]|08-SRNP-345|669[0n]bp
Drephalys Burns01|[9095]|08-SRNP-41486|669[0n]bp
Drephalys Burns01|[9096]|08-SRNP-71839|669[0n]bp
Drephalys kidonoi|[9097]|06-SRNP-60166|576[0n]bp
Drephalys kidonoi|[9098]|02-SRNP-12965|618[0n]bp
Drephalys kidonoi|[9099]|02-SRNP-12979|609[0n]bp
Drephalys kidonoi|[9100]|02-SRNP-13368|597[1n]bp
Drephalys kidonoi|[9101]|02-SRNP-10261|615[0n]bp
Drephalys kidonoi|[9102]|02-SRNP-13429|669[0n]bp
Drephalys kidonoi|[9103]|02-SRNP-12978|669[0n]bp
Drephalys kidonoi|[9104]|02-SRNP-10329|669[0n]bp
Drephalys kidonoi|[9105]|02-SRNP-10250|669[0n]bp
Drephalys kidonoi|[9106]|02-SRNP-13369|669[0n]bp
Drephalys kidonoi|[9107]|02-SRNP-10252|669[0n]bp
Drephalys kidonoi|[9108]|02-SRNP-13103|669[0n]bp
Drephalys kidonoi|[9109]|01-SRNP-12341|528[0n]bp
Drephalys kidonoi|[9110]|02-SRNP-13370|492[0n]bp
Drephalys kidonoi|[9111]|06-SRNP-60079|615[0n]bp
Drephalys kidonoi|[9112]|07-SRNP-55278|609[0n]bp
Drephalys kidonoi|[9113]|09-SRNP-55224|669[0n]bp
Drephalys kidonoi|[9114]|09-SRNP-55518|669[0n]bp
Cogia hiska|[9115]|03-SRNP-250|645[0n]bp
Cogia hiska|[9116]|03-SRNP-101|630[0n]bp
Cogia hiska|[9117]|06-SRNP-12193|669[0n]bp
Cogia hiska|[9118]|03-SRNP-18|669[0n]bp
Cogia hiska|[9119]|03-SRNP-14096|669[0n]bp
Cogia hiska|[9120]|03-SRNP-13714|669[0n]bp
Cogia hiska|[9121]|02-SRNP-12905|669[0n]bp
Cogia hiska|[9122]|02-SRNP-13343|669[0n]bp
Cogia hiska|[9123]|02-SRNP-13341|669[0n]bp
Cogia hiska|[9124]|02-SRNP-13338|669[0n]bp
Cogia hiska|[9125]|02-SRNP-13244|669[0n]bp
Cogia hiska|[9126]|02-SRNP-12906|669[0n]bp
Cogia hiska|[9127]|02-SRNP-13604|669[0n]bp
Cogia hiska|[9128]|02-SRNP-13580|669[0n]bp
Cogia hiska|[9129]|02-SRNP-13357|669[0n]bp
Cogia hiska|[9130]|02-SRNP-13348|669[0n]bp
Cogia hiska|[9131]|02-SRNP-13346|669[0n]bp
Typhedanus undulatus|[9132]|05-SRNP-5907|669[4n]bp
Typhedanus undulatus|[9133]|05-SRNP-7507|669[1n]bp
Typhedanus undulatus|[9134]|05-SRNP-5906|627[0n]bp
Typhedanus undulatus|[9135]|99-SRNP-12788|624[0n]bp
Typhedanus undulatus|[9136]|98-SRNP-6246|639[0n]bp
Typhedanus undulatus|[9137]|04-SRNP-24403|669[0n]bp
Typhedanus undulatus|[9138]|06-SRNP-21153|669[0n]bp
Typhedanus undulatus|[9139]|07-SRNP-41835|669[0n]bp
Typhedanus undulatus|[9140]|07-SRNP-3071|669[0n]bp
Typhedanus undulatus|[9141]|07-SRNP-23877|669[0n]bp
Cogia calchasDHJ01|[9142]|05-SRNP-12001|591[0n]bp
Cogia calchasDHJ01|[9143]|04-SRNP-49737|669[0n]bp
Cogia calchasDHJ01|[9144]|07-SRNP-55314|669[0n]bp
Cogia calchasDHJ01|[9145]|98-SRNP-6237|669[0n]bp
Cogia calchasDHJ01|[9146]|93-SRNP-6683|669[0n]bp
Cogia calchasDHJ01|[9147]|06-SRNP-13361|669[0n]bp
Cogia calchasDHJ01|[9148]|04-SRNP-48664|669[0n]bp
Cogia calchasDHJ01|[9149]|97-SRNP-379|624[0n]bp
Cogia calchasDHJ01|[9150]|07-SRNP-45272|645[0n]bp
Cogia calchasDHJ01|[9151]|03-SRNP-31305|669[0n]bp
Cogia calchasDHJ01|[9152]|98-SRNP-6173|669[0n]bp
Cogia calchasDHJ01|[9153]|98-SRNP-6178|669[0n]bp
Cogia calchasDHJ01|[9154]|06-SRNP-13417|669[0n]bp
Cogia calchasDHJ01|[9155]|05-SRNP-31856|669[0n]bp
Cogia calchasDHJ01|[9156]|03-SRNP-6772|663[0n]bp
Cogia calchasDHJ01|[9157]|97-SRNP-296|666[0n]bp
Cogia calchasDHJ01|[9158]|98-SRNP-6163|669[0n]bp
Cogia calchasDHJ01|[9159]|08-SRNP-2425|669[0n]bp
Cogia calchasDHJ01|[9160]|08-SRNP-2467|669[0n]bp
Cogia calchasDHJ01|[9161]|09-SRNP-80678|669[0n]bp
Cogia calchasDHJ02|[9162]|05-SRNP-32463|669[0n]bp
Cogia calchasDHJ02|[9163]|04-SRNP-55362|669[0n]bp
Cogia calchasDHJ02|[9164]|05-SRNP-32462|651[0n]bp
Cogia calchasDHJ02|[9165]|00-SRNP-21991|669[0n]bp
Cogia calchasDHJ02|[9166]|09-SRNP-73335|669[0n]bp
Cogia calchasDHJ02|[9167]|09-SRNP-73332|669[0n]bp
Cogia calchasDHJ02|[9168]|09-SRNP-80699|669[0n]bp
Udranomía orcinus|[9169]|04-SRNP-41230|648[0n]bp
Udranomía orcinus|[9170]|05-SRNP-2555|669[4n]bp
Udranomía orcinus|[9171]|04-SRNP-30933|669[0n]bp
Udranomía orcinus|[9172]|04-SRNP-31229|669[1n]bp
Udranomía orcinus|[9173]|03-SRNP-5582|525[1n]bp
Udranomía orcinus|[9174]|05-SRNP-1457|669[0n]bp
Udranomía orcinus|[9175]|07-SRNP-40320|669[0n]bp
Udranomía orcinus|[9176]|08-SRNP-1673|669[0n]bp
Udranomía orcinus|[9177]|05-SRNP-21131|687[0n]bp
Udranomía orcinus|[9178]|08-SRNP-22893|669[0n]bp
Udranomía orcinus|[9179]|08-SRNP-41217|669[0n]bp
Udranomía orcinus|[9180]|07-SRNP-20955|669[0n]bp
Udranomía orcinus|[9181]|08-SRNP-31332|669[0n]bp
Udranomía orcinus|[9182]|08-SRNP-40514|669[0n]bp
Udranomía orcinus|[9183]|08-SRNP-1672|669[0n]bp
Udranomía orcinus|[9184]|08-SRNP-20817|669[0n]bp
Udranomía orcinus|[9185]|08-SRNP-20850|669[0n]bp
Udranomía orcinus|[9186]|08-SRNP-818|669[0n]bp
Udranomía orcinus|[9187]|08-SRNP-30988|669[0n]bp
Udranomía orcinus|[9188]|07-SRNP-65382|669[0n]bp
Udranomía orcinus|[9189]|07-SRNP-40260|669[0n]bp
Udranomía orcinus|[9190]|07-SRNP-1287|669[0n]bp
Udranomía orcinus|[9191]|06-SRNP-23065|669[0n]bp
Udranomía orcinus|[9192]|04-SRNP-31004|669[0n]bp
Udranomía orcinus|[9193]|04-SRNP-42858|669[0n]bp
Udranomía orcinus|[9194]|07-SRNP-40862|666[0n]bp
Udranomía orcinus|[9195]|06-SRNP-41751|666[1n]bp
Udranomía orcinus|[9196]|05-SRNP-31979|669[3n]bp

```

```

Udranomia orcinus|[9194]|07-SRNP-40862|666[0n]bp
Udranomia orcinus|[9195]|06-SRNP-41751|666[1n]bp
Udranomia orcinus|[9196]|05-SRNP-31979|669[3n]bp
Udranomia orcinus|[9197]|03-SRNP-10433|519[1n]bp
Udranomia orcinus|[9198]|05-SRNP-8128|648[1n]bp
Udranomia orcinus|[9199]|05-SRNP-41043|567[2n]bp
Udranomia orcinus|[9200]|05-SRNP-8135|633[0n]bp
Udranomia orcinus|[9201]|07-SRNP-24023|645[0n]bp
Udranomia orcinus|[9202]|08-SRNP-70812|639[0n]bp
Udranomia orcinus|[9203]|08-SRNP-66180|669[0n]bp
Udranomia orcinus|[9204]|09-SRNP-67117|669[0n]bp
Udranomia orcinus|[9205]|09-SRNP-69354|669[0n]bp
Udranomia orcinus|[9206]|09-SRNP-80703|669[0n]bp
Udranomia eurus|[9207]|03-SRNP-11250|561[0n]bp
Udranomia kikkawaiDHJ03|[9208]|08-SRNP-21971|669[0n]bp
Udranomia kikkawaiDHJ03|[9209]|08-SRNP-21969|669[0n]bp
Udranomia kikkawaiDHJ03|[9210]|96-SRNP-1042|594[0n]bp
Udranomia kikkawaiDHJ03|[9211]|06-SRNP-55723|669[0n]bp
Udranomia kikkawaiDHJ03|[9212]|07-SRNP-55337|639[0n]bp
Udranomia kikkawaiDHJ03|[9213]|07-SRNP-55336|639[0n]bp
Udranomia kikkawaiDHJ03|[9214]|08-SRNP-21281|669[0n]bp
Udranomia kikkawaiDHJ03|[9215]|07-SRNP-56346|669[0n]bp
Udranomia kikkawaiDHJ03|[9216]|07-SRNP-56440|669[0n]bp
Udranomia kikkawaiDHJ03|[9217]|07-SRNP-56118|669[0n]bp
Udranomia kikkawaiDHJ03|[9218]|07-SRNP-55138|669[0n]bp
Udranomia kikkawaiDHJ03|[9219]|01-SRNP-9758|669[0n]bp
Udranomia kikkawaiDHJ03|[9220]|01-SRNP-24435|669[0n]bp
Udranomia kikkawaiDHJ03|[9221]|02-SRNP-11244|669[0n]bp
Udranomia kikkawaiDHJ03|[9222]|02-SRNP-11245|669[0n]bp
Udranomia kikkawaiDHJ03|[9223]|00-SRNP-2831|669[0n]bp
Udranomia kikkawaiDHJ03|[9224]|01-SRNP-17596|669[0n]bp
Udranomia kikkawaiDHJ03|[9225]|07-SRNP-55917|630[0n]bp
Udranomia kikkawaiDHJ03|[9226]|02-SRNP-32867|633[1n]bp
Udranomia kikkawaiDHJ03|[9227]|07-SRNP-56117|654[0n]bp
Udranomia kikkawaiDHJ03|[9228]|07-SRNP-20950|660[0n]bp
Udranomia kikkawaiDHJ03|[9229]|07-SRNP-23337|669[0n]bp
Udranomia kikkawaiDHJ03|[9230]|07-SRNP-23338|669[0n]bp
Udranomia kikkawaiDHJ03|[9231]|08-SRNP-56040|669[0n]bp
Udranomia kikkawaiDHJ03|[9232]|08-SRNP-20600|669[0n]bp
Udranomia kikkawaiDHJ03|[9233]|08-SRNP-20931|669[0n]bp
Udranomia kikkawaiDHJ03|[9234]|08-SRNP-21219|669[0n]bp
Udranomia kikkawaiDHJ03|[9235]|08-SRNP-21967|669[0n]bp
Udranomia kikkawaiDHJ03|[9236]|08-SRNP-21965|669[0n]bp
Udranomia kikkawaiDHJ03|[9237]|08-SRNP-23929|669[0n]bp
Udranomia kikkawaiDHJ03|[9238]|08-SRNP-16988|669[0n]bp
Udranomia kikkawaiDHJ01|[9239]|03-SRNP-12017|567[0n]bp
Udranomia kikkawaiDHJ01|[9240]|96-SRNP-807|594[0n]bp
Udranomia kikkawaiDHJ01|[9241]|96-SRNP-1053|594[0n]bp
Udranomia kikkawaiDHJ01|[9242]|96-SRNP-1007|576[0n]bp
Udranomia kikkawaiDHJ01|[9243]|00-SRNP-6094|669[0n]bp
Udranomia kikkawaiDHJ01|[9244]|01-SRNP-17593|630[1n]bp
Udranomia kikkawaiDHJ01|[9245]|02-SRNP-4194|630[0n]bp
Udranomia kikkawaiDHJ01|[9246]|02-SRNP-10083|627[0n]bp
Udranomia kikkawaiDHJ01|[9247]|07-SRNP-55350|642[0n]bp
Udranomia kikkawaiDHJ01|[9248]|08-SRNP-21920|633[0n]bp
Udranomia kikkawaiDHJ01|[9249]|07-SRNP-55803|669[0n]bp
Udranomia kikkawaiDHJ01|[9250]|07-SRNP-55804|669[0n]bp
Udranomia kikkawaiDHJ01|[9251]|07-SRNP-55142|669[0n]bp
Udranomia kikkawaiDHJ01|[9252]|06-SRNP-56437|669[0n]bp
Udranomia kikkawaiDHJ01|[9253]|01-SRNP-24380|669[0n]bp
Udranomia kikkawaiDHJ01|[9254]|03-SRNP-966|669[0n]bp
Udranomia kikkawaiDHJ01|[9255]|01-SRNP-17592|669[0n]bp
Udranomia kikkawaiDHJ01|[9256]|06-SRNP-13261|666[0n]bp
Udranomia kikkawaiDHJ01|[9257]|97-SRNP-4074|573[0n]bp
Udranomia kikkawaiDHJ01|[9258]|06-SRNP-13260|669[1n]bp
Udranomia kikkawaiDHJ01|[9259]|96-SRNP-930|324[2n]bp
Udranomia kikkawaiDHJ01|[9260]|07-SRNP-20867|600[0n]bp
Udranomia kikkawaiDHJ01|[9261]|07-SRNP-20972|669[0n]bp
Udranomia kikkawaiDHJ01|[9262]|07-SRNP-23327|669[0n]bp
Udranomia kikkawaiDHJ01|[9263]|08-SRNP-20601|669[0n]bp
Udranomia kikkawaiDHJ01|[9264]|08-SRNP-20596|669[0n]bp
Udranomia kikkawaiDHJ01|[9265]|08-SRNP-21165|669[0n]bp
Udranomia kikkawaiDHJ01|[9266]|08-SRNP-12275|669[0n]bp
Udranomia kikkawaiDHJ01|[9267]|08-SRNP-12197|645[0n]bp
Udranomia kikkawaiDHJ01|[9268]|07-SRNP-55686|645[0n]bp
Udranomia kikkawaiDHJ01|[9269]|07-SRNP-56119|645[0n]bp
Udranomia kikkawaiDHJ01|[9270]|07-SRNP-12122|645[0n]bp
Udranomia kikkawaiDHJ01|[9271]|02-SRNP-14029|627[0n]bp
Udranomia kikkawaiDHJ01|[9272]|08-SRNP-12195|621[0n]bp
Udranomia kikkawaiDHJ01|[9273]|97-SRNP-4069|624[0n]bp
Udranomia kikkawaiDHJ01|[9274]|08-SRNP-16999|669[0n]bp
Udranomia kikkawaiDHJ01|[9275]|08-SRNP-75002|669[0n]bp
Udranomia kikkawaiDHJ01|[9276]|08-SRNP-16997|669[0n]bp
Udranomia kikkawaiDHJ01|[9277]|08-SRNP-12158|669[0n]bp
Udranomia kikkawaiDHJ01|[9278]|08-SRNP-21923|669[0n]bp
Udranomia kikkawaiDHJ01|[9279]|08-SRNP-21924|669[0n]bp
Udranomia kikkawaiDHJ01|[9280]|08-SRNP-21968|669[0n]bp
Udranomia kikkawaiDHJ01|[9281]|08-SRNP-21926|669[0n]bp
Udranomia kikkawaiDHJ01|[9282]|07-SRNP-20946|669[0n]bp
Udranomia kikkawaiDHJ01|[9283]|08-SRNP-55525|669[0n]bp
Udranomia kikkawaiDHJ01|[9284]|08-SRNP-20481|669[0n]bp
Udranomia kikkawaiDHJ01|[9285]|08-SRNP-20636|669[0n]bp
Udranomia kikkawaiDHJ01|[9286]|08-SRNP-20882|669[0n]bp
Udranomia kikkawaiDHJ01|[9287]|08-SRNP-20635|669[0n]bp
Udranomia kikkawaiDHJ01|[9288]|08-SRNP-45146|669[0n]bp
Udranomia kikkawaiDHJ01|[9289]|07-SRNP-23341|669[0n]bp
Udranomia kikkawaiDHJ01|[9290]|07-SRNP-20956|669[0n]bp
Udranomia kikkawaiDHJ01|[9291]|07-SRNP-20953|669[0n]bp
Udranomia kikkawaiDHJ01|[9292]|07-SRNP-56274|669[0n]bp
Udranomia kikkawaiDHJ01|[9293]|07-SRNP-12359|669[0n]bp
Udranomia kikkawaiDHJ01|[9294]|07-SRNP-12102|669[0n]bp
Udranomia kikkawaiDHJ01|[9295]|07-SRNP-55349|669[0n]bp
Udranomia kikkawaiDHJ01|[9296]|07-SRNP-55351|669[0n]bp

```

Udranom i a k i kkawai DHJ01[9294]|07-SRNP-12102|669[0n]bp  
 Udranom i a k i kkawai DHJ01[9295]|07-SRNP-55349|669[0n]bp  
 Udranom i a k i kkawai DHJ01[9296]|07-SRNP-55351|669[0n]bp  
 Udranom i a k i kkawai DHJ01[9297]|07-SRNP-12180|669[0n]bp  
 Udranom i a k i kkawai DHJ01[9298]|07-SRNP-12127|669[0n]bp  
 Udranom i a k i kkawai DHJ01[9299]|07-SRNP-12034|669[0n]bp  
 Udranom i a k i kkawai DHJ01[9300]|07-SRNP-12098|669[0n]bp  
 Udranom i a k i kkawai DHJ01[9301]|07-SRNP-55263|669[0n]bp  
 Udranom i a k i kkawai DHJ01[9302]|06-SRNP-13329|669[0n]bp  
 Udranom i a k i kkawai DHJ01[9303]|06-SRNP-56079|669[0n]bp  
 Udranom i a k i kkawai DHJ01[9304]|96-SRNP-1155|669[0n]bp  
 Udranom i a k i kkawai DHJ01[9305]|96-SRNP-832|669[0n]bp  
 Udranom i a k i kkawai DHJ01[9306]|99-SRNP-2706|669[0n]bp  
 Udranom i a k i kkawai DHJ01[9307]|01-SRNP-24490|669[0n]bp  
 Udranom i a k i kkawai DHJ01[9308]|01-SRNP-24434|669[0n]bp  
 Udranom i a k i kkawai DHJ01[9309]|02-SRNP-5956|669[0n]bp  
 Udranom i a k i kkawai DHJ01[9310]|01-SRNP-17953|669[0n]bp  
 Udranom i a k i kkawai DHJ01[9311]|02-SRNP-4127|669[0n]bp  
 Udranom i a k i kkawai DHJ01[9312]|01-SRNP-17591|669[0n]bp  
 Udranom i a k i kkawai DHJ01[9313]|03-SRNP-12056|669[0n]bp  
 Udranom i a k i kkawai DHJ01[9314]|05-SRNP-45233|669[0n]bp  
 Udranom i a k i kkawai DHJ01[9315]|05-SRNP-45219|669[0n]bp  
 Udranom i a k i kkawai DHJ01[9316]|04-SRNP-45504|669[0n]bp  
 Udranom i a k i kkawai DHJ01[9317]|04-SRNP-16075|669[0n]bp  
 Udranom i a k i kkawai DHJ01[9318]|04-SRNP-45505|669[0n]bp  
 Udranom i a k i kkawai DHJ01[9319]|07-SRNP-20954|621[0n]bp  
 Udranom i a k i kkawai DHJ01[9320]|05-SRNP-12029|669[0n]bp  
 Udranom i a k i kkawai DHJ01[9321]|04-SRNP-45599|669[0n]bp  
 Udranom i a k i kkawai DHJ01[9322]|07-SRNP-12099|666[0n]bp  
 Udranom i a k i kkawai DHJ01[9323]|07-SRNP-12101|663[1n]bp  
 Udranom i a k i kkawai DHJ01[9324]|07-SRNP-56275|651[0n]bp  
 Udranom i a k i kkawai DHJ01[9325]|07-SRNP-55265|642[0n]bp  
 Udranom i a k i kkawai DHJ01[9326]|07-SRNP-20952|603[0n]bp  
 Udranom i a k i kkawai DHJ01[9327]|08-SRNP-75004|669[1n]bp  
 Udranom i a k i kkawai DHJ01[9328]|09-SRNP-12113|669[1n]bp  
 Udranom i a k i kkawai DHJ01[9329]|08-SRNP-16994|669[0n]bp  
 Udranom i a k i kkawai DHJ01[9330]|09-SRNP-20996|669[0n]bp  
 Udranom i a k i kkawai DHJ02[9331]|96-SRNP-1054|594[0n]bp  
 Udranom i a k i kkawai DHJ02[9332]|05-SRNP-41045|669[0n]bp  
 Udranom i a k i kkawai DHJ02[9333]|04-SRNP-30985|669[0n]bp  
 Udranom i a k i kkawai DHJ02[9334]|05-SRNP-21026|669[1n]bp  
 Udranom i a k i kkawai DHJ02[9335]|01-SRNP-22738|669[0n]bp  
 Udranom i a k i kkawai DHJ02[9336]|03-SRNP-10461|669[0n]bp  
 Udranom i a k i kkawai DHJ02[9337]|05-SRNP-40465|669[0n]bp  
 Udranom i a k i kkawai DHJ02[9338]|06-SRNP-3255|645[0n]bp  
 Udranom i a k i kkawai DHJ02[9339]|03-SRNP-10577|645[0n]bp  
 Udranom i a k i kkawai DHJ02[9340]|04-SRNP-40828|669[1n]bp  
 Udranom i a k i kkawai DHJ02[9341]|08-SRNP-31128|669[0n]bp  
 Udranom i a k i kkawai DHJ02[9342]|08-SRNP-21090|669[0n]bp  
 Udranom i a k i kkawai DHJ02[9343]|08-SRNP-70104|669[0n]bp  
 Udranom i a k i kkawai DHJ02[9344]|07-SRNP-40724|669[0n]bp  
 Udranom i a k i kkawai DHJ02[9345]|06-SRNP-23003|669[0n]bp  
 Udranom i a k i kkawai DHJ02[9346]|06-SRNP-41739|669[0n]bp  
 Udranom i a k i kkawai DHJ02[9347]|06-SRNP-41738|669[0n]bp  
 Udranom i a k i kkawai DHJ02[9348]|06-SRNP-41442|669[0n]bp  
 Udranom i a k i kkawai DHJ02[9349]|03-SRNP-10604|669[0n]bp  
 Udranom i a k i kkawai DHJ02[9350]|03-SRNP-10392|669[0n]bp  
 Udranom i a k i kkawai DHJ02[9351]|03-SRNP-10390|669[0n]bp  
 Udranom i a k i kkawai DHJ02[9352]|03-SRNP-11383|669[0n]bp  
 Udranom i a k i kkawai DHJ02[9353]|02-SRNP-21390|669[0n]bp  
 Udranom i a k i kkawai DHJ02[9354]|03-SRNP-10391|669[0n]bp  
 Udranom i a k i kkawai DHJ02[9355]|02-SRNP-2617|669[0n]bp  
 Udranom i a k i kkawai DHJ02[9356]|02-SRNP-6916|669[0n]bp  
 Udranom i a k i kkawai DHJ02[9357]|06-SRNP-3420|669[0n]bp  
 Udranom i a k i kkawai DHJ02[9358]|06-SRNP-3422|669[0n]bp  
 Udranom i a k i kkawai DHJ02[9359]|05-SRNP-31041|669[0n]bp  
 Udranom i a k i kkawai DHJ02[9360]|05-SRNP-21024|669[0n]bp  
 Udranom i a k i kkawai DHJ02[9361]|04-SRNP-31720|669[0n]bp  
 Udranom i a k i kkawai DHJ02[9362]|04-SRNP-41255|669[0n]bp  
 Udranom i a k i kkawai DHJ02[9363]|04-SRNP-2413|669[0n]bp  
 Udranom i a k i kkawai DHJ02[9364]|06-SRNP-41737|669[1n]bp  
 Udranom i a k i kkawai DHJ02[9365]|06-SRNP-41741|669[1n]bp  
 Udranom i a k i kkawai DHJ02[9366]|06-SRNP-3253|669[1n]bp  
 Udranom i a k i kkawai DHJ02[9367]|06-SRNP-32415|606[0n]bp  
 Udranom i a k i kkawai DHJ02[9368]|06-SRNP-34647|660[0n]bp  
 Udranom i a k i kkawai DHJ02[9369]|07-SRNP-40376|663[0n]bp  
 Udranom i a k i kkawai DHJ02[9370]|08-SRNP-40430|648[1n]bp  
 Udranom i a k i kkawai DHJ02[9371]|08-SRNP-65801|669[1n]bp  
 Udranom i a k i kkawai DHJ02[9372]|08-SRNP-41215|669[0n]bp  
 Udranom i a k i kkawai DHJ02[9373]|08-SRNP-32449|669[1n]bp  
 Udranom i a k i kkawai DHJ02[9374]|03-SRNP-10011|627[0n]bp  
 Udranom i a k i kkawai DHJ02[9375]|06-SRNP-41523|669[0n]bp  
 Udranom i a k i kkawai DHJ02[9376]|09-SRNP-69425|669[0n]bp  
 Udranom i a k i kkawai DHJ02[9377]|06-SRNP-3714|669[0n]bp  
 Udranom i a k i kkawai DHJ02[9378]|06-SRNP-3715|669[1n]bp  
 Udranom i a k i kkawai DHJ02[9379]|06-SRNP-32537|669[0n]bp  
 Udranom i a k i kkawai DHJ02[9380]|03-SRNP-10389|642[0n]bp  
 Udranom i a k i kkawai DHJ02[9381]|05-SRNP-31092|669[0n]bp  
 Udranom i a k i kkawai DHJ02[9382]|06-SRNP-31634|669[0n]bp  
 Udranom i a k i kkawai DHJ02[9383]|08-SRNP-40400|669[0n]bp  
 Udranom i a k i kkawai DHJ02[9384]|08-SRNP-71686|669[0n]bp  
 Udranom i a k i kkawai DHJ02[9385]|09-SRNP-69506|669[0n]bp  
 Udranom i a k i kkawai DHJ02[9386]|09-SRNP-69421|669[0n]bp  
 Udranom i a k i kkawai DHJ02[9387]|09-SRNP-69505|669[0n]bp  
 Udranom i a k i kkawai DHJ02[9388]|09-SRNP-41711|669[0n]bp  
 Udranom i a k i kkawai DHJ02[9389]|02-SRNP-19637|618[0n]bp  
 Udranom i a k i kkawai DHJ02[9390]|06-SRNP-41526|669[0n]bp  
 Udranom i a k i kkawai DHJ02[9391]|05-SRNP-31080|669[0n]bp  
 Udranom i a k i kkawai DHJ02[9392]|03-SRNP-5785|669[1n]bp  
 Udranom i a k i kkawai DHJ02[9393]|06-SRNP-41524|669[1n]bp  
 Udranom i a k i kkawai DHJ02[9394]|09-SRNP-42041|669[0n]bp
