# Supplementary material for: Reading the Complex Skipper Butterfly Fauna of One Tropical Place
Source: PubMed Central journal article supplement (PMC3156701; doi:10.1371/journal.pone.0019874), 2011-08-16
Supplement: pone.0019874.s003.pdf [file pone.0019874.s003.pdf]

**Table S2. Accession codes for all specimens considered in Table S1.**

| <b>Tree Order</b> | <b>Species</b>            | <b>Subfamily</b> | <b>ACG Sampleid</b> | <b>BOLD Processid</b> | <b>Genbank Accession</b> |
|-------------------|---------------------------|------------------|---------------------|-----------------------|--------------------------|
| 1                 | Typhedanus ampyx          | Pyrginae         | 95-SRNP-4704        | MHAHH757-06           | GU155675                 |
| 2                 | Typhedanus ampyx          | Pyrginae         | 02-SRNP-13978       | MHAHH758-06           | GU155676                 |
| 3                 | Typhedanus ampyx          | Pyrginae         | 03-SRNP-27074       | MHAHH753-06           | GU155674                 |
| 4                 | Typhedanus ampyx          | Pyrginae         | 04-SRNP-15699       | MHAHE155-05           | GU150132                 |
| 5                 | Typhedanus ampyx          | Pyrginae         | 02-SRNP-13972       | CSCR269-04            | DQ293621                 |
| 6                 | Typhedanus ampyx          | Pyrginae         | 06-SRNP-19495       | MHAHI530-06           | GU156375                 |
| 7                 | Typhedanus ampyx          | Pyrginae         | 08-SRNP-16243       | MHMXY1095-09          | GU666443                 |
| 8                 | Niconiades gladys         | Pyrginae         | 08-SRNP-40802       | MHMXX986-09           | JF778133                 |
| 9                 | Niconiades gladys         | Pyrginae         | 08-SRNP-41006       | MHMXX985-09           | JF778132                 |
| 10                | Niconiades gladys         | Pyrginae         | 08-SRNP-41005       | MHMXX984-09           | JF778131                 |
| 11                | Niconiades gladys         | Pyrginae         | 08-SRNP-41008       | MHMXX983-09           | JF778130                 |
| 12                | Niconiades gladys         | Pyrginae         | 08-SRNP-41007       | MHMXX982-09           | JF778129                 |
| 13                | Niconiades gladys         | Pyrginae         | 07-SRNP-41299       | MHAHL396-07           | JF762437                 |
| 14                | Niconiades gladys         | Pyrginae         | 07-SRNP-40880       | MHAHL393-07           | JF762435                 |
| 15                | Niconiades gladys         | Pyrginae         | 07-SRNP-41499       | MHAHL392-07           | JF762434                 |
| 16                | Niconiades gladys         | Pyrginae         | 07-SRNP-40878       | MHAHL391-07           | JF762433                 |
| 17                | Niconiades gladys         | Pyrginae         | 07-SRNP-42460       | MHMXX956-08           | JF762439                 |
| 18                | Niconiades gladys         | Pyrginae         | 07-SRNP-41297       | MHAHL395-07           | JF762436                 |
| 19                | Niconiades gladys         | Pyrginae         | 07-SRNP-42104       | MHMXX957-08           | JF762438                 |
| 20                | Niconiades gladys         | Pyrginae         | 08-SRNP-40804       | MHMXX987-09           | JF778134                 |
| 21                | Niconiades gladys         | Pyrginae         | 08-SRNP-40803       | MHMXX988-09           | JF778135                 |
| 22                | Niconiades xanthaphes     | Pyrginae         | 07-SRNP-40674       | MHMXX006-07           | JF762444                 |
| 23                | Niconiades xanthaphes     | Pyrginae         | 08-SRNP-24219       | MHMYB136-09           | HM893823                 |
| 24                | Niconiades xanthaphes     | Pyrginae         | 04-SRNP-48297       | MHAHE033-05           | GU149763                 |
| 25                | Niconiades xanthaphes     | Pyrginae         | 09-SRNP-21365       | MHMYH152-10           | HM887300                 |
| 26                | Niconiades xanthaphes     | Pyrginae         | 09-SRNP-20105       | MHMYB135-09           | GU649692                 |
| 27                | Niconiades xanthaphes     | Pyrginae         | 07-SRNP-40588       | MHMXX005-07           | JF762445                 |
| 28                | Niconiades xanthaphes     | Pyrginae         | 06-SRNP-40704       | MHAHG674-06           | GU151494                 |
| 29                | Niconiades xanthaphes     | Pyrginae         | 08-SRNP-45150       | MHMXX980-09           | JF778136                 |
| 30                | Niconiades xanthaphes     | Pyrginae         | 07-SRNP-41908       | MHAHL398-07           | JF762441                 |
| 31                | Niconiades xanthaphes     | Pyrginae         | 07-SRNP-41909       | MHAHL397-07           | JF762440                 |
| 32                | Niconiades xanthaphes     | Pyrginae         | 06-SRNP-41203       | MHAHG675-06           | GU151495                 |
| 33                | Niconiades xanthaphes     | Pyrginae         | 04-SRNP-13906       | MHAHE031-05           | GU149767                 |
| 34                | Niconiades xanthaphes     | Pyrginae         | 04-SRNP-13942       | MHAHE030-05           | GU149765                 |
| 35                | Niconiades xanthaphes     | Pyrginae         | 04-SRNP-23563       | MHAHE029-05           | GU149766                 |
| 36                | Niconiades xanthaphes     | Pyrginae         | 01-SRNP-17553       | CSCR158-04            | DQ292760                 |
| 37                | Niconiades xanthaphes     | Pyrginae         | 02-SRNP-30345       | CSCR159-04            | DQ292761                 |
| 38                | Niconiades xanthaphes     | Pyrginae         | 04-SRNP-14330       | MHAHE032-05           | GU149764                 |
| 39                | Niconiades xanthaphes     | Pyrginae         | 08-SRNP-274         | MHMXT152-08           | JF762443                 |
| 40                | Niconiades xanthaphes     | Pyrginae         | 08-SRNP-273         | MHMXT153-08           | JF762442                 |
| 41                | Niconiades xanthaphes     | Pyrginae         | 08-SRNP-24218       | MHMYB137-09           | GU649687                 |
| 42                | Niconiades xanthaphes     | Pyrginae         | 09-SRNP-68536       | MHMYI586-10           | HQ963902                 |
| 43                | Celaenorrhinus stallingsi | Pyrginae         | 94-SRNP-569         | MHMXI582-07           | JF760536                 |
| 44                | Celaenorrhinus stallingsi | Pyrginae         | 06-SRNP-47719       | MHAHJ878-07           | JF752566                 |
| 45                | Celaenorrhinus stallingsi | Pyrginae         | 04-SRNP-27175       | MHAHI320-06           | GU155894                 |
| 46                | Celaenorrhinus stallingsi | Pyrginae         | 05-SRNP-48589       | MHAHG193-06           | GU151298                 |
| 47                | Celaenorrhinus stallingsi | Pyrginae         | 04-SRNP-45627       | MHAHC155-05           | DQ292083                 |
| 48                | Celaenorrhinus stallingsi | Pyrginae         | 04-SRNP-46658       | MHAHC147-05           | DQ292082                 |
| 49                | Celaenorrhinus stallingsi | Pyrginae         | 04-SRNP-45628       | MHAHC139-05           | DQ292081                 |
| 50                | Celaenorrhinus stallingsi | Pyrginae         | 04-SRNP-45248       | MHAHC133-05           | DQ292080                 |
| 51                | Celaenorrhinus stallingsi | Pyrginae         | 04-SRNP-45054       | MHAHC125-05           | DQ292079                 |
| 52                | Celaenorrhinus stallingsi | Pyrginae         | 03-SRNP-29104       | MHAHC117-05           | DQ292078                 |
| 53                | Celaenorrhinus stallingsi | Pyrginae         | 04-SRNP-45303       | MHAHC101-05           | DQ292077                 |
| 54                | Celaenorrhinus stallingsi | Pyrginae         | 03-SRNP-29103       | CSCR492-04            | DQ292074                 |
| 55                | Celaenorrhinus stallingsi | Pyrginae         | 02-SRNP-8079        | CSCR065-04            | DQ292073                 |

| <b>Tree Order</b> | <b>Species</b>                | <b>Subfamily</b> | <b>ACG Sampleid</b> | <b>BOLD Processid</b> | <b>Genbank Accession</b> |
|-------------------|-------------------------------|------------------|---------------------|-----------------------|--------------------------|
| 56                | Celaenorrhinus stallingsi     | Pyrginae         | 04-SRNP-45199       | MHAHC056-05           | DQ292075                 |
| 57                | Celaenorrhinus stallingsi     | Pyrginae         | 04-SRNP-45280       | MHAHC072-05           | DQ292076                 |
| 58                | Celaenorrhinus stallingsi     | Pyrginae         | 05-SRNP-24342       | MHAHK019-07           | JF760535                 |
| 59                | Celaenorrhinus stallingsi     | Pyrginae         | 07-SRNP-35248       | MHMXX018-07           | JF761898                 |
| 60                | Celaenorrhinus stallingsi     | Pyrginae         | 08-SRNP-35005       | MHMXX1040-09          | JF777761                 |
| 61                | Celaenorrhinus stallingsi     | Pyrginae         | 08-SRNP-45153       | MHMXX1045-09          | JF777762                 |
| 62                | Celaenorrhinus fritzgaertneri | Pyrginae         | 07-SRNP-58872       | MHMXR892-08           | JF761896                 |
| 63                | Celaenorrhinus fritzgaertneri | Pyrginae         | 07-SRNP-56429       | MHMXX014-07           | JF761897                 |
| 64                | Celaenorrhinus fritzgaertneri | Pyrginae         | 05-SRNP-60702       | MHAHK030-07           | JF760534                 |
| 65                | Celaenorrhinus fritzgaertneri | Pyrginae         | 06-SRNP-19668       | MHAHK020-07           | JF760532                 |
| 66                | Celaenorrhinus fritzgaertneri | Pyrginae         | 04-SRNP-46882       | MHAHC163-05           | DQ292072                 |
| 67                | Celaenorrhinus fritzgaertneri | Pyrginae         | 04-SRNP-47171       | MHAHC123-05           | DQ292070                 |
| 68                | Celaenorrhinus fritzgaertneri | Pyrginae         | 93-SRNP-6905        | CSRII436-04           | DQ292069                 |
| 69                | Celaenorrhinus fritzgaertneri | Pyrginae         | 04-SRNP-47172       | MHAHC131-05           | DQ292071                 |
| 70                | Celaenorrhinus fritzgaertneri | Pyrginae         | 93-SRNP-6145        | CSRII435-04           | DQ292068                 |
| 71                | Celaenorrhinus fritzgaertneri | Pyrginae         | 95-SRNP-9563        | CSCR062-04            | DQ292067                 |
| 72                | Celaenorrhinus fritzgaertneri | Pyrginae         | 05-SRNP-64117       | MHAHK027-07           | JF760533                 |
| 73                | Celaenorrhinus fritzgaertneri | Pyrginae         | 09-SRNP-13046       | MHMYB150-09           | GU649688                 |
| 74                | Celaenorrhinus approximatus   | Pyrginae         | 03-SRNP-4049        | CSCR490-04            | DQ292027                 |
| 75                | Celaenorrhinus approximatus   | Pyrginae         | 04-SRNP-35283       | MHAHC107-05           | DQ292031                 |
| 76                | Celaenorrhinus approximatus   | Pyrginae         | 04-SRNP-35231       | MHAHC099-05           | DQ292029                 |
| 77                | Celaenorrhinus approximatus   | Pyrginae         | 04-SRNP-35236       | MHAHC180-05           | DQ292044                 |
| 78                | Celaenorrhinus approximatus   | Pyrginae         | 04-SRNP-35375       | MHAHC148-05           | DQ292039                 |
| 79                | Celaenorrhinus approximatus   | Pyrginae         | 04-SRNP-35276       | MHAHC140-05           | DQ292037                 |
| 80                | Celaenorrhinus approximatus   | Pyrginae         | 04-SRNP-35243       | MHAHC132-05           | DQ292036                 |
| 81                | Celaenorrhinus approximatus   | Pyrginae         | 04-SRNP-35230       | MHAHC124-05           | DQ292035                 |
| 82                | Celaenorrhinus approximatus   | Pyrginae         | 04-SRNP-35247       | MHAHC116-05           | DQ292034                 |
| 83                | Celaenorrhinus approximatus   | Pyrginae         | 04-SRNP-35245       | MHAHC108-05           | DQ292032                 |
| 84                | Celaenorrhinus approximatus   | Pyrginae         | 04-SRNP-35242       | MHAHC100-05           | DQ292030                 |
| 85                | Celaenorrhinus approximatus   | Pyrginae         | 04-SRNP-35234       | MHAHC173-05           | DQ292043                 |
| 86                | Celaenorrhinus approximatus   | Pyrginae         | 04-SRNP-35239       | MHAHC165-05           | DQ292042                 |
| 87                | Celaenorrhinus approximatus   | Pyrginae         | 04-SRNP-35233       | MHAHC157-05           | DQ292041                 |
| 88                | Celaenorrhinus approximatus   | Pyrginae         | 04-SRNP-35235       | MHAHC149-05           | DQ292040                 |
| 89                | Celaenorrhinus approximatus   | Pyrginae         | 04-SRNP-35282       | MHAHC141-05           | DQ292038                 |
| 90                | Celaenorrhinus approximatus   | Pyrginae         | 04-SRNP-35280       | MHAHC109-05           | DQ292033                 |
| 91                | Celaenorrhinus approximatus   | Pyrginae         | 03-SRNP-4053        | CSCR491-04            | DQ292028                 |
| 92                | Celaenorrhinus approximatus   | Pyrginae         | 04-SRNP-35281       | MHAHC181-05           | DQ292045                 |
| 93                | Celaenorrhinus approximatus   | Pyrginae         | 06-SRNP-35037       | MHAHG649-06           | GU151268                 |
| 94                | Celaenorrhinus approximatus   | Pyrginae         | 07-SRNP-35584       | MHMXX017-07           | JF761867                 |
| 95                | Celaenorrhinus Burns03        | Pyrginae         | 05-SRNP-2519        | MHAHI313-06           | GU155887                 |
| 96                | Celaenorrhinus Burns03        | Pyrginae         | 06-SRNP-2390        | MHAHG643-06           | GU151285                 |
| 97                | Celaenorrhinus Burns03        | Pyrginae         | 06-SRNP-2415        | MHAHG644-06           | GU151284                 |
| 98                | Celaenorrhinus Burns03        | Pyrginae         | 06-SRNP-1475        | MHAHG645-06           | GU151283                 |
| 99                | Celaenorrhinus Burns03        | Pyrginae         | 06-SRNP-7150        | MHAHJ495-07           | JF752565                 |
| 100               | Celaenorrhinus Burns03        | Pyrginae         | 05-SRNP-570         | MHAHG093-06           | GU151281                 |
| 101               | Celaenorrhinus Burns03        | Pyrginae         | 05-SRNP-567         | MHAHI316-06           | GU155890                 |
| 102               | Celaenorrhinus Burns03        | Pyrginae         | 05-SRNP-751         | MHAHG081-06           | GU151282                 |
| 103               | Celaenorrhinus Burns03        | Pyrginae         | 07-SRNP-1399        | MHMXX013-07           | JF761885                 |
| 104               | Celaenorrhinus Burns03        | Pyrginae         | 05-SRNP-6010        | MHAHK028-07           | JF760525                 |
| 105               | Celaenorrhinus Burns03        | Pyrginae         | 05-SRNP-5661        | MHAHK025-07           | JF760524                 |
| 106               | Celaenorrhinus Burns03        | Pyrginae         | 04-SRNP-26450       | MHAHI318-06           | GU155892                 |
| 107               | Celaenorrhinus Burns03        | Pyrginae         | 05-SRNP-1346        | MHAHI317-06           | GU155891                 |
| 108               | Celaenorrhinus Burns03        | Pyrginae         | 05-SRNP-569         | MHAHI315-06           | GU155889                 |
| 109               | Celaenorrhinus Burns03        | Pyrginae         | 04-SRNP-26452       | MHAHI314-06           | GU155888                 |
| 110               | Celaenorrhinus Burns03        | Pyrginae         | 05-SRNP-568         | MHAHG094-06           | GU151280                 |
| 111               | Celaenorrhinus Burns03        | Pyrginae         | 05-SRNP-6011        | MHAHK029-07           | JF760526                 |

| <b>Tree Order</b> | <b>Species</b>         | <b>Subfamily</b> | <b>ACG Sampleid</b> | <b>BOLD Processid</b> | <b>Genbank Accession</b> |
|-------------------|------------------------|------------------|---------------------|-----------------------|--------------------------|
| 112               | Celaenorrhinus Burns03 | Pyrginae         | 03-SRNP-5449        | CSCR494-04            | DQ292056                 |
| 113               | Celaenorrhinus Burns03 | Pyrginae         | 06-SRNP-679         | MHAHG191-06           | GU151287                 |
| 114               | Celaenorrhinus Burns03 | Pyrginae         | 06-SRNP-1485        | MHAHG646-06           | GU151286                 |
| 115               | Celaenorrhinus Burns03 | Pyrginae         | 05-SRNP-2378        | MHAHI311-06           | GU155885                 |
| 116               | Celaenorrhinus Burns03 | Pyrginae         | 05-SRNP-752         | MHAHI312-06           | GU155886                 |
| 117               | Celaenorrhinus Burns03 | Pyrginae         | 05-SRNP-6009        | MHAHK023-07           | JF760523                 |
| 118               | Celaenorrhinus Burns03 | Pyrginae         | 05-SRNP-5819        | MHAHK031-07           | JF760527                 |
| 119               | Celaenorrhinus Burns03 | Pyrginae         | 07-SRNP-609         | MHMXX023-07           | JF761884                 |
| 120               | Celaenorrhinus Burns03 | Pyrginae         | 07-SRNP-1398        | MHMXX024-07           | JF761883                 |
| 121               | Celaenorrhinus Burns03 | Pyrginae         | 07-SRNP-1659        | MHAHL557-07           | JF761881                 |
| 122               | Celaenorrhinus Burns03 | Pyrginae         | 07-SRNP-1478        | MHAHL559-07           | JF761882                 |
| 123               | Celaenorrhinus eligius | Pyrginae         | 07-SRNP-21870       | MHAHL558-07           | JF761886                 |
| 124               | Celaenorrhinus eligius | Pyrginae         | 05-SRNP-34575       | MHAHG194-06           | GU151296                 |
| 125               | Celaenorrhinus eligius | Pyrginae         | 07-SRNP-23595       | MHMXR894-08           | JF761890                 |
| 126               | Celaenorrhinus eligius | Pyrginae         | 07-SRNP-770         | MHMXX019-07           | JF761893                 |
| 127               | Celaenorrhinus eligius | Pyrginae         | 07-SRNP-580         | MHMXX015-07           | JF761895                 |
| 128               | Celaenorrhinus eligius | Pyrginae         | 06-SRNP-59174       | MHAHK018-07           | JF760530                 |
| 129               | Celaenorrhinus eligius | Pyrginae         | 06-SRNP-1045        | MHAHG195-06           | GU151297                 |
| 130               | Celaenorrhinus eligius | Pyrginae         | 06-SRNP-1044        | MHAHG190-06           | GU151294                 |
| 131               | Celaenorrhinus eligius | Pyrginae         | 05-SRNP-31037       | MHAHG083-06           | GU151288                 |
| 132               | Celaenorrhinus eligius | Pyrginae         | 97-SRNP-11551       | MHAHC374-05           | DQ292066                 |
| 133               | Celaenorrhinus eligius | Pyrginae         | 98-SRNP-6383        | MHAHC373-05           | DQ292065                 |
| 134               | Celaenorrhinus eligius | Pyrginae         | 04-SRNP-32649       | MHAHC048-05           | DQ292061                 |
| 135               | Celaenorrhinus eligius | Pyrginae         | 04-SRNP-45100       | MHAHC064-05           | DQ292062                 |
| 136               | Celaenorrhinus eligius | Pyrginae         | 07-SRNP-60093       | MHMXX0936-08          | JF761891                 |
| 137               | Celaenorrhinus eligius | Pyrginae         | 08-SRNP-65084       | MHMXT094-08           | JF761889                 |
| 138               | Celaenorrhinus eligius | Pyrginae         | 07-SRNP-24063       | MHMXT095-08           | JF761888                 |
| 139               | Celaenorrhinus eligius | Pyrginae         | 08-SRNP-703         | MHMXX1049-09          | JF777759                 |
| 140               | Celaenorrhinus eligius | Pyrginae         | 06-SRNP-2608        | MHAHG650-06           | GU151291                 |
| 141               | Celaenorrhinus eligius | Pyrginae         | 07-SRNP-24053       | MHMXT096-08           | JF761887                 |
| 142               | Celaenorrhinus eligius | Pyrginae         | 06-SRNP-9991        | MHMXX020-07           | JF761892                 |
| 143               | Celaenorrhinus eligius | Pyrginae         | 07-SRNP-55146       | MHMXX016-07           | JF761894                 |
| 144               | Celaenorrhinus eligius | Pyrginae         | 05-SRNP-20010       | MHAHI319-06           | GU155893                 |
| 145               | Celaenorrhinus eligius | Pyrginae         | 06-SRNP-45187       | MHAHG648-06           | GU151293                 |
| 146               | Celaenorrhinus eligius | Pyrginae         | 06-SRNP-45188       | MHAHG647-06           | GU151292                 |
| 147               | Celaenorrhinus eligius | Pyrginae         | 06-SRNP-586         | MHAHG192-06           | GU151295                 |
| 148               | Celaenorrhinus eligius | Pyrginae         | 05-SRNP-48036       | MHAHG092-06           | GU151289                 |
| 149               | Celaenorrhinus eligius | Pyrginae         | 04-SRNP-21218       | MHAHC172-05           | DQ292064                 |
| 150               | Celaenorrhinus eligius | Pyrginae         | 06-SRNP-1795        | MHAHG652-06           | GU151290                 |
| 151               | Celaenorrhinus eligius | Pyrginae         | 02-SRNP-4737        | CSCR061-04            | DQ292057                 |
| 152               | Celaenorrhinus eligius | Pyrginae         | 04-SRNP-30412       | CSRII179-04           | DQ292060                 |
| 153               | Celaenorrhinus eligius | Pyrginae         | 04-SRNP-45098       | MHAHC088-05           | DQ292063                 |
| 154               | Celaenorrhinus eligius | Pyrginae         | 06-SRNP-59205       | MHAHK017-07           | JF760529                 |
| 155               | Celaenorrhinus eligius | Pyrginae         | 06-SRNP-59204       | MHAHK016-07           | JF760528                 |
| 156               | Celaenorrhinus eligius | Pyrginae         | 04-SRNP-412         | CSRII178-04           | DQ292059                 |
| 157               | Celaenorrhinus eligius | Pyrginae         | 95-SRNP-9367        | CSCR493-04            | DQ292058                 |
| 158               | Celaenorrhinus eligius | Pyrginae         | 06-SRNP-47652       | MHAHK034-07           | JF760531                 |
| 159               | Celaenorrhinus eligius | Pyrginae         | 08-SRNP-55519       | MHMXX1041-09          | JF777755                 |
| 160               | Celaenorrhinus eligius | Pyrginae         | 08-SRNP-65085       | MHMXX1042-09          | JF777756                 |
| 161               | Celaenorrhinus eligius | Pyrginae         | 08-SRNP-1523        | MHMXX1043-09          | JF777757                 |
| 162               | Celaenorrhinus eligius | Pyrginae         | 08-SRNP-702         | MHMXX1047-09          | JF777758                 |
| 163               | Celaenorrhinus eligius | Pyrginae         | 08-SRNP-1062        | MHMXX1052-09          | JF777760                 |
| 164               | Celaenorrhinus eligius | Pyrginae         | 08-SRNP-24026       | MHMYB151-09           | GU649683                 |
| 165               | Celaenorrhinus Burns01 | Pyrginae         | 07-SRNP-322         | MHMXX021-07           | JF761880                 |
| 166               | Celaenorrhinus Burns01 | Pyrginae         | 06-SRNP-34867       | MHAHJ877-07           | JF752564                 |
| 167               | Celaenorrhinus Burns01 | Pyrginae         | 04-SRNP-31134       | MHAHC080-05           | DQ292048                 |

| <b>Tree Order</b> | <b>Species</b>         | <b>Subfamily</b> | <b>ACG Sampleid</b> | <b>BOLD Processid</b> | <b>Genbank Accession</b> |
|-------------------|------------------------|------------------|---------------------|-----------------------|--------------------------|
| 168               | Celaenorrhinus Burns01 | Pyrginae         | 07-SRNP-2116        | MHAHL556-07           | JF761871                 |
| 169               | Celaenorrhinus Burns01 | Pyrginae         | 06-SRNP-7072        | MHAHJ496-07           | JF752563                 |
| 170               | Celaenorrhinus Burns01 | Pyrginae         | 06-SRNP-43466       | MHAHI495-06           | GU155883                 |
| 171               | Celaenorrhinus Burns01 | Pyrginae         | 05-SRNP-30928       | MHAHG091-06           | GU151273                 |
| 172               | Celaenorrhinus Burns01 | Pyrginae         | 04-SRNP-26417       | MHAHG089-06           | GU151278                 |
| 173               | Celaenorrhinus Burns01 | Pyrginae         | 04-SRNP-26244       | MHAHG088-06           | GU151277                 |
| 174               | Celaenorrhinus Burns01 | Pyrginae         | 05-SRNP-1753        | MHAHG085-06           | GU151271                 |
| 175               | Celaenorrhinus Burns01 | Pyrginae         | 04-SRNP-1521        | MHAHC187-05           | DQ292055                 |
| 176               | Celaenorrhinus Burns01 | Pyrginae         | 04-SRNP-26070       | MHAHG090-06           | GU151276                 |
| 177               | Celaenorrhinus Burns01 | Pyrginae         | 05-SRNP-31094       | MHAHG087-06           | GU151274                 |
| 178               | Celaenorrhinus Burns01 | Pyrginae         | 06-SRNP-31079       | MHAHG642-06           | GU151279                 |
| 179               | Celaenorrhinus Burns01 | Pyrginae         | 00-SRNP-20678       | CSCR059-04            | DQ292046                 |
| 180               | Celaenorrhinus Burns01 | Pyrginae         | 07-SRNP-1746        | MHAHL555-07           | JF761870                 |
| 181               | Celaenorrhinus Burns01 | Pyrginae         | 07-SRNP-3335        | MHMXX0937-08          | JF761878                 |
| 182               | Celaenorrhinus Burns01 | Pyrginae         | 07-SRNP-66148       | MHMXR893-08           | JF761872                 |
| 183               | Celaenorrhinus Burns01 | Pyrginae         | 08-SRNP-1552        | MHMXX1048-09          | JF777751                 |
| 184               | Celaenorrhinus Burns01 | Pyrginae         | 08-SRNP-31104       | MHMXX1050-09          | JF777752                 |
| 185               | Celaenorrhinus Burns01 | Pyrginae         | 08-SRNP-4324        | MHMXX634-09           | JF777754                 |
| 186               | Celaenorrhinus Burns01 | Pyrginae         | 08-SRNP-1270        | MHMXX1044-09          | JF777749                 |
| 187               | Celaenorrhinus Burns01 | Pyrginae         | 08-SRNP-32133       | MHMXY1013-09          | GU666518                 |
| 188               | Celaenorrhinus Burns01 | Pyrginae         | 09-SRNP-56693       | MHMYH187-10           | HM887334                 |
| 189               | Celaenorrhinus Burns01 | Pyrginae         | 05-SRNP-33241       | MHAHK024-07           | JF760521                 |
| 190               | Celaenorrhinus Burns01 | Pyrginae         | 05-SRNP-6400        | MHAHK026-07           | JF760522                 |
| 191               | Celaenorrhinus Burns01 | Pyrginae         | 06-SRNP-43399       | MHAHI494-06           | GU155884                 |
| 192               | Celaenorrhinus Burns01 | Pyrginae         | 05-SRNP-5759        | MHAHK021-07           | JF760519                 |
| 193               | Celaenorrhinus Burns01 | Pyrginae         | 05-SRNP-1850        | MHAHG084-06           | GU151272                 |
| 194               | Celaenorrhinus Burns01 | Pyrginae         | 05-SRNP-1852        | MHAHG082-06           | GU151269                 |
| 195               | Celaenorrhinus Burns01 | Pyrginae         | 04-SRNP-1512        | MHAHC098-05           | DQ292049                 |
| 196               | Celaenorrhinus Burns01 | Pyrginae         | 04-SRNP-1743        | MHAHC179-05           | DQ292054                 |
| 197               | Celaenorrhinus Burns01 | Pyrginae         | 04-SRNP-40721       | MHAHC171-05           | DQ292053                 |
| 198               | Celaenorrhinus Burns01 | Pyrginae         | 04-SRNP-33215       | MHAHC115-05           | DQ292050                 |
| 199               | Celaenorrhinus Burns01 | Pyrginae         | 04-SRNP-30415       | MHAHC164-05           | DQ292052                 |
| 200               | Celaenorrhinus Burns01 | Pyrginae         | 04-SRNP-30592       | MHAHC156-05           | DQ292051                 |
| 201               | Celaenorrhinus Burns01 | Pyrginae         | 05-SRNP-976         | MHAHG080-06           | GU151270                 |
| 202               | Celaenorrhinus Burns01 | Pyrginae         | 05-SRNP-30880       | MHAHG086-06           | GU151275                 |
| 203               | Celaenorrhinus Burns01 | Pyrginae         | 07-SRNP-3289        | MHMXX0940-08          | JF761875                 |
| 204               | Celaenorrhinus Burns01 | Pyrginae         | 02-SRNP-27941       | CSCR060-04            | DQ292047                 |
| 205               | Celaenorrhinus Burns01 | Pyrginae         | 07-SRNP-2663        | MHAHL553-07           | JF761868                 |
| 206               | Celaenorrhinus Burns01 | Pyrginae         | 07-SRNP-2535        | MHAHL554-07           | JF761869                 |
| 207               | Celaenorrhinus Burns01 | Pyrginae         | 05-SRNP-5758        | MHAHK022-07           | JF760520                 |
| 208               | Celaenorrhinus Burns01 | Pyrginae         | 07-SRNP-3397        | MHMXX0938-08          | JF761877                 |
| 209               | Celaenorrhinus Burns01 | Pyrginae         | 07-SRNP-3148        | MHMXX0939-08          | JF761876                 |
| 210               | Celaenorrhinus Burns01 | Pyrginae         | 07-SRNP-2970        | MHMXX0941-08          | JF761874                 |
| 211               | Celaenorrhinus Burns01 | Pyrginae         | 07-SRNP-3214        | MHMXX0942-08          | JF761873                 |
| 212               | Celaenorrhinus Burns01 | Pyrginae         | 07-SRNP-30343       | MHMXX022-07           | JF761879                 |
| 213               | Celaenorrhinus Burns01 | Pyrginae         | 08-SRNP-2417        | MHMXX1046-09          | JF777750                 |
| 214               | Celaenorrhinus Burns01 | Pyrginae         | 08-SRNP-1521        | MHMXX1051-09          | JF777753                 |
| 215               | Celaenorrhinus Burns01 | Pyrginae         | 08-SRNP-32287       | MHMXY1014-09          | GU666511                 |
| 216               | Celaenorrhinus Burns01 | Pyrginae         | 08-SRNP-72595       | MHMXY1015-09          | GU666512                 |
| 217               | Celaenorrhinus Burns01 | Pyrginae         | 08-SRNP-72651       | MHMXY1016-09          | GU666513                 |
| 218               | Celaenorrhinus Burns01 | Pyrginae         | 09-SRNP-65032       | MHMYC457-09           | GU649881                 |
| 219               | Celaenorrhinus Burns01 | Pyrginae         | 09-SRNP-57269       | MHMYE1492-09          | GU653512                 |
| 220               | Celaenorrhinus Burns01 | Pyrginae         | 09-SRNP-69994       | MHMYH188-10           | HM887335                 |
| 221               | Celaenorrhinus Burns01 | Pyrginae         | 09-SRNP-68526       | MHMYH189-10           | HM887336                 |
| 222               | Polythrix mexicanus    | Pyrginae         | 02-SRNP-13621       | MHAHI408-06           | GU156262                 |
| 223               | Polythrix mexicanus    | Pyrginae         | 02-SRNP-13008       | MHAHI409-06           | GU156264                 |

| <b>Tree Order</b> | <b>Species</b>       | <b>Subfamily</b> | <b>ACG Sampleid</b> | <b>BOLD Processid</b> | <b>Genbank Accession</b> |
|-------------------|----------------------|------------------|---------------------|-----------------------|--------------------------|
| 224               | Polythrix mexicanus  | Pyrginae         | 92-SRNP-5352        | MHAHC474-05           | DQ293081                 |
| 225               | Polythrix mexicanus  | Pyrginae         | 93-SRNP-4855        | MHAHI357-06           | GU156260                 |
| 226               | Polythrix mexicanus  | Pyrginae         | 93-SRNP-3545        | MHAHC489-05           | DQ293084                 |
| 227               | Polythrix mexicanus  | Pyrginae         | 92-SRNP-5324        | MHAHI367-06           | GU156254                 |
| 228               | Polythrix mexicanus  | Pyrginae         | 92-SRNP-5274        | MHAHI365-06           | GU156256                 |
| 229               | Polythrix mexicanus  | Pyrginae         | 93-SRNP-4630        | MHAHI362-06           | GU156253                 |
| 230               | Polythrix mexicanus  | Pyrginae         | 94-SRNP-5238        | MHAHI358-06           | GU156258                 |
| 231               | Polythrix mexicanus  | Pyrginae         | 93-SRNP-4636        | MHAHC475-05           | DQ293082                 |
| 232               | Polythrix mexicanus  | Pyrginae         | 01-SRNP-12021       | CSRII149-04           | DQ293079                 |
| 233               | Polythrix mexicanus  | Pyrginae         | 92-SRNP-4357        | MHAHI366-06           | GU156257                 |
| 234               | Polythrix mexicanus  | Pyrginae         | 01-SRNP-12023       | CSRII150-04           | DQ293080                 |
| 235               | Polythrix mexicanus  | Pyrginae         | 92-SRNP-5323        | MHAHC482-05           | DQ293083                 |
| 236               | Polythrix mexicanus  | Pyrginae         | 92-SRNP-4305        | MHAHI368-06           | GU156255                 |
| 237               | Polythrix mexicanus  | Pyrginae         | 97-SRNP-3333        | MHAHI379-06           | GU156252                 |
| 238               | Polythrix mexicanus  | Pyrginae         | 02-SRNP-32034       | MHAHI387-06           | GU156259                 |
| 239               | Polythrix mexicanus  | Pyrginae         | 02-SRNP-10227       | MHAHI389-06           | GU156261                 |
| 240               | Polythrix mexicanus  | Pyrginae         | 02-SRNP-13108       | MHAHI391-06           | GU156271                 |
| 241               | Polythrix mexicanus  | Pyrginae         | 02-SRNP-13603       | MHAHI394-06           | GU156270                 |
| 242               | Polythrix mexicanus  | Pyrginae         | 02-SRNP-13105       | MHAHI395-06           | GU156268                 |
| 243               | Polythrix mexicanus  | Pyrginae         | 02-SRNP-13009       | MHAHI400-06           | GU156269                 |
| 244               | Polythrix mexicanus  | Pyrginae         | 02-SRNP-13010       | MHAHI401-06           | GU156265                 |
| 245               | Polythrix mexicanus  | Pyrginae         | 02-SRNP-13536       | MHAHI402-06           | GU156266                 |
| 246               | Polythrix mexicanus  | Pyrginae         | 02-SRNP-32036       | MHAHI403-06           | GU156267                 |
| 247               | Polythrix mexicanus  | Pyrginae         | 02-SRNP-13220       | MHAHI410-06           | GU156263                 |
| 248               | Polythrix mexicanus  | Pyrginae         | 07-SRNP-12114       | MHMXX271-07           | JF762671                 |
| 249               | Polythrix mexicanus  | Pyrginae         | 07-SRNP-14671       | MHMXX712-09           | JF778411                 |
| 250               | Polythrix asineDHJ04 | Pyrginae         | 04-SRNP-48896       | MHAHE165-05           | GU149857                 |
| 251               | Polythrix asineDHJ04 | Pyrginae         | 06-SRNP-43437       | MHAHJ892-07           | JF753081                 |
| 252               | Polythrix asineDHJ02 | Pyrginae         | 09-SRNP-156         | MHMYC524-09           |                          |
| 253               | Polythrix asineDHJ01 | Pyrginae         | 00-SRNP-6383        | MHAHI441-06           | GU156099                 |
| 254               | Polythrix asineDHJ01 | Pyrginae         | 00-SRNP-6384        | MHAHI433-06           | GU156117                 |
| 255               | Polythrix asineDHJ01 | Pyrginae         | 98-SRNP-4268        | MHAHI356-06           | GU156131                 |
| 256               | Polythrix asineDHJ01 | Pyrginae         | 05-SRNP-24590       | MHAHF742-06           | GU150713                 |
| 257               | Polythrix asineDHJ01 | Pyrginae         | 00-SRNP-6488        | CSRII142-04           | DQ293048                 |
| 258               | Polythrix asineDHJ01 | Pyrginae         | 05-SRNP-59384       | MHAHF294-06           | GU150712                 |
| 259               | Polythrix asineDHJ01 | Pyrginae         | 99-SRNP-18818       | CSRII146-04           | DQ293050                 |
| 260               | Polythrix asineDHJ01 | Pyrginae         | 00-SRNP-7383        | MHAHI1008-07          | GU156125                 |
| 261               | Polythrix asineDHJ01 | Pyrginae         | 07-SRNP-12113       | MHMXX275-07           | JF762656                 |
| 262               | Polythrix asineDHJ01 | Pyrginae         | 06-SRNP-46863       | MHAHJ677-07           | JF753080                 |
| 263               | Polythrix asineDHJ01 | Pyrginae         | 06-SRNP-46862       | MHAHJ645-07           | JF753079                 |
| 264               | Polythrix asineDHJ01 | Pyrginae         | 00-SRNP-6220        | MHAHI996-07           | GU156116                 |
| 265               | Polythrix asineDHJ01 | Pyrginae         | 97-SRNP-3760        | MHAHI457-06           | GU156110                 |
| 266               | Polythrix asineDHJ01 | Pyrginae         | 99-SRNP-6116        | MHAHI456-06           | GU156109                 |
| 267               | Polythrix asineDHJ01 | Pyrginae         | 00-SRNP-6415        | MHAHI449-06           | GU156140                 |
| 268               | Polythrix asineDHJ01 | Pyrginae         | 00-SRNP-6824        | MHAHI446-06           | GU156119                 |
| 269               | Polythrix asineDHJ01 | Pyrginae         | 00-SRNP-6382        | MHAHI430-06           | GU156121                 |
| 270               | Polythrix asineDHJ01 | Pyrginae         | 03-SRNP-764         | MHAHI423-06           | GU156123                 |
| 271               | Polythrix asineDHJ01 | Pyrginae         | 02-SRNP-10287       | MHAHI415-06           | GU156137                 |
| 272               | Polythrix asineDHJ01 | Pyrginae         | 02-SRNP-10302       | MHAHI414-06           | GU156095                 |
| 273               | Polythrix asineDHJ01 | Pyrginae         | 02-SRNP-10070       | MHAHI406-06           | GU156146                 |
| 274               | Polythrix asineDHJ01 | Pyrginae         | 02-SRNP-17485       | MHAHI390-06           | GU156149                 |
| 275               | Polythrix asineDHJ01 | Pyrginae         | 02-SRNP-32959       | MHAHI386-06           | GU156088                 |
| 276               | Polythrix asineDHJ01 | Pyrginae         | 01-SRNP-12146       | MHAHI382-06           | GU156135                 |
| 277               | Polythrix asineDHJ01 | Pyrginae         | 95-SRNP-9068        | MHAHI372-06           | GU156098                 |
| 278               | Polythrix asineDHJ01 | Pyrginae         | 06-SRNP-12613       | MHAHG659-06           | GU151574                 |
| 279               | Polythrix asineDHJ01 | Pyrginae         | 04-SRNP-13416       | MHAHE170-05           | GU149853                 |

| Tree Order | Species              | Subfamily | ACG Sampleid  | BOLD Processid | Genbank Accession |
|------------|----------------------|-----------|---------------|----------------|-------------------|
| 280        | Polythrix asineDHJ01 | Pyrginae  | 04-SRNP-16090 | MHAHE167-05    | GU149854          |
| 281        | Polythrix asineDHJ01 | Pyrginae  | 04-SRNP-14315 | MHAHE166-05    | GU149855          |
| 282        | Polythrix asineDHJ01 | Pyrginae  | 98-SRNP-4421  | MHAHC486-05    | DQ293071          |
| 283        | Polythrix asineDHJ01 | Pyrginae  | 04-SRNP-21571 | MHAHC035-05    | DQ293055          |
| 284        | Polythrix asineDHJ01 | Pyrginae  | 04-SRNP-21230 | MHAHC020-05    | DQ293053          |
| 285        | Polythrix asineDHJ01 | Pyrginae  | 04-SRNP-21464 | MHAHC012-05    | DQ293052          |
| 286        | Polythrix asineDHJ01 | Pyrginae  | 04-SRNP-21224 | MHAHC004-05    | DQ293051          |
| 287        | Polythrix asineDHJ01 | Pyrginae  | 04-SRNP-21232 | MHAHC092-05    | DQ293058          |
| 288        | Polythrix asineDHJ01 | Pyrginae  | 00-SRNP-6108  | MHAHI995-07    | GU156087          |
| 289        | Polythrix asineDHJ01 | Pyrginae  | 95-SRNP-818   | MHAHI1031-07   | GU156147          |
| 290        | Polythrix asineDHJ01 | Pyrginae  | 92-SRNP-4290  | MHAHI361-06    | GU156101          |
| 291        | Polythrix asineDHJ01 | Pyrginae  | 03-SRNP-765   | MHAHI425-06    | GU156118          |
| 292        | Polythrix asineDHJ01 | Pyrginae  | 06-SRNP-55628 | MHAHG128-06    | GU151575          |
| 293        | Polythrix asineDHJ01 | Pyrginae  | 96-SRNP-177   | MHAHI1032-07   | GU156124          |
| 294        | Polythrix asineDHJ01 | Pyrginae  | 00-SRNP-6015  | MHAHI374-06    | GU156097          |
| 295        | Polythrix asineDHJ01 | Pyrginae  | 95-SRNP-817   | MHAHC481-05    | DQ293068          |
| 296        | Polythrix asineDHJ01 | Pyrginae  | 98-SRNP-4202  | MHAHI1052-07   | GU156105          |
| 297        | Polythrix asineDHJ01 | Pyrginae  | 97-SRNP-3720  | MHAHI381-06    | GU156094          |
| 298        | Polythrix asineDHJ01 | Pyrginae  | 93-SRNP-3748  | MHAHC473-05    | DQ293063          |
| 299        | Polythrix asineDHJ01 | Pyrginae  | 93-SRNP-4295  | MHAHI1038-07   | GU156133          |
| 300        | Polythrix asineDHJ01 | Pyrginae  | 97-SRNP-3979  | MHAHC470-05    | DQ293060          |
| 301        | Polythrix asineDHJ01 | Pyrginae  | 96-SRNP-10668 | MHAHC478-05    | DQ293066          |
| 302        | Polythrix asineDHJ01 | Pyrginae  | 97-SRNP-4088  | MHAHC469-05    | DQ293059          |
| 303        | Polythrix asineDHJ01 | Pyrginae  | 00-SRNP-6491  | MHAHI451-06    | GU156112          |
| 304        | Polythrix asineDHJ01 | Pyrginae  | 91-SRNP-1631  | MHAHI1020-07   | GU156128          |
| 305        | Polythrix asineDHJ01 | Pyrginae  | 91-SRNP-784   | MHAHI1022-07   | GU156130          |
| 306        | Polythrix asineDHJ01 | Pyrginae  | 00-SRNP-6954  | MHAHI1025-07   | GU156134          |
| 307        | Polythrix asineDHJ01 | Pyrginae  | 99-SRNP-2390  | MHAHI1026-07   | GU156136          |
| 308        | Polythrix asineDHJ01 | Pyrginae  | 93-SRNP-124   | MHAHI1029-07   | GU156143          |
| 309        | Polythrix asineDHJ01 | Pyrginae  | 94-SRNP-567   | MHAHI1030-07   | GU156144          |
| 310        | Polythrix asineDHJ01 | Pyrginae  | 93-SRNP-4312  | MHAHI1036-07   | GU156141          |
| 311        | Polythrix asineDHJ01 | Pyrginae  | 93-SRNP-4696  | MHAHI1039-07   | GU156138          |
| 312        | Polythrix asineDHJ01 | Pyrginae  | 93-SRNP-3899  | MHAHI1042-07   | GU156142          |
| 313        | Polythrix asineDHJ01 | Pyrginae  | 93-SRNP-8053  | MHAHI1047-07   | GU156104          |
| 314        | Polythrix asineDHJ01 | Pyrginae  | 93-SRNP-4515  | MHAHI1055-07   | GU156107          |
| 315        | Polythrix asineDHJ01 | Pyrginae  | 07-SRNP-56773 | MHAHL466-07    | JF762654          |
| 316        | Polythrix asineDHJ01 | Pyrginae  | 08-SRNP-21481 | MHMXW495-09    | JF754090          |
| 317        | Polythrix asineDHJ01 | Pyrginae  | 07-SRNP-12456 | MHMXX1176-09   | JF778407          |
| 318        | Polythrix asineDHJ01 | Pyrginae  | 07-SRNP-12455 | MHMXX1177-09   | JF778408          |
| 319        | Polythrix asineDHJ01 | Pyrginae  | 02-SRNP-19815 | MHAHI405-06    | GU156145          |
| 320        | Polythrix asineDHJ01 | Pyrginae  | 92-SRNP-4286  | MHAHI1001-07   | GU156122          |
| 321        | Polythrix asineDHJ01 | Pyrginae  | 05-SRNP-34180 | MHAHF745-06    | GU150710          |
| 322        | Polythrix asineDHJ01 | Pyrginae  | 04-SRNP-14104 | MHAHE171-05    | GU149852          |
| 323        | Polythrix asineDHJ01 | Pyrginae  | 06-SRNP-12714 | MHAHH562-06    | GU155458          |
| 324        | Polythrix asineDHJ01 | Pyrginae  | 96-SRNP-8726  | MHAHC472-05    | DQ293062          |
| 325        | Polythrix asineDHJ01 | Pyrginae  | 00-SRNP-6183  | MHAHI1024-07   | GU156132          |
| 326        | Polythrix asineDHJ01 | Pyrginae  | 00-SRNP-6737  | MHAHI999-07    | GU156103          |
| 327        | Polythrix asineDHJ01 | Pyrginae  | 01-SRNP-12057 | MHAHI994-07    | GU156086          |
| 328        | Polythrix asineDHJ01 | Pyrginae  | 01-SRNP-12044 | MHAHI998-07    | GU156102          |
| 329        | Polythrix asineDHJ01 | Pyrginae  | 05-SRNP-5142  | MHAHF293-06    | GU150711          |
| 330        | Polythrix asineDHJ01 | Pyrginae  | 96-SRNP-10264 | MHAHC488-05    | DQ293072          |
| 331        | Polythrix asineDHJ01 | Pyrginae  | 01-SRNP-12145 | MHAHI383-06    | GU156092          |
| 332        | Polythrix asineDHJ01 | Pyrginae  | 96-SRNP-8830  | MHAHI1053-07   | GU156106          |
| 333        | Polythrix asineDHJ01 | Pyrginae  | 93-SRNP-4232  | MHAHI1056-07   | GU156108          |
| 334        | Polythrix asineDHJ01 | Pyrginae  | 08-SRNP-2029  | MHMXW476-09    | JF754088          |
| 335        | Polythrix asineDHJ01 | Pyrginae  | 94-SRNP-7830  | MHAHI351-06    | GU156127          |

| Tree Order | Species              | Subfamily | ACG Sampleid  | BOLD Processid | Genbank Accession |
|------------|----------------------|-----------|---------------|----------------|-------------------|
| 336        | Polythrix asineDHJ01 | Pyrginae  | 95-SRNP-9644  | MHAHI354-06    | GU156129          |
| 337        | Polythrix asineDHJ01 | Pyrginae  | 93-SRNP-4695  | MHAHI364-06    | GU156100          |
| 338        | Polythrix asineDHJ01 | Pyrginae  | 93-SRNP-3926  | MHAHI370-06    | GU156089          |
| 339        | Polythrix asineDHJ01 | Pyrginae  | 00-SRNP-6613  | MHAHI377-06    | GU156096          |
| 340        | Polythrix asineDHJ01 | Pyrginae  | 00-SRNP-6394  | MHAHI378-06    | GU156090          |
| 341        | Polythrix asineDHJ01 | Pyrginae  | 01-SRNP-12359 | MHAHI384-06    | GU156093          |
| 342        | Polythrix asineDHJ01 | Pyrginae  | 02-SRNP-10304 | MHAHI399-06    | GU156148          |
| 343        | Polythrix asineDHJ01 | Pyrginae  | 03-SRNP-29556 | MHAHI424-06    | GU156139          |
| 344        | Polythrix asineDHJ01 | Pyrginae  | 03-SRNP-777   | MHAHI429-06    | GU156120          |
| 345        | Polythrix asineDHJ01 | Pyrginae  | 00-SRNP-6487  | MHAHI431-06    | GU156085          |
| 346        | Polythrix asineDHJ01 | Pyrginae  | 00-SRNP-6367  | MHAHI439-06    | GU156115          |
| 347        | Polythrix asineDHJ01 | Pyrginae  | 00-SRNP-6497  | MHAHI440-06    | GU156091          |
| 348        | Polythrix asineDHJ01 | Pyrginae  | 00-SRNP-6494  | MHAHI444-06    | GU156113          |
| 349        | Polythrix asineDHJ01 | Pyrginae  | 00-SRNP-6395  | MHAHI445-06    | GU156114          |
| 350        | Polythrix asineDHJ01 | Pyrginae  | 01-SRNP-18701 | MHAHI1005-07   | GU156111          |
| 351        | Polythrix asineDHJ01 | Pyrginae  | 00-SRNP-6700  | MHAHI1009-07   | GU156126          |
| 352        | Polythrix asineDHJ01 | Pyrginae  | 07-SRNP-20846 | MHMXK269-07    | JF762657          |
| 353        | Polythrix asineDHJ01 | Pyrginae  | 07-SRNP-57195 | MHMXO822-08    | JF762655          |
| 354        | Polythrix asineDHJ01 | Pyrginae  | 08-SRNP-56049 | MHMXW491-09    | JF754089          |
| 355        | Polythrix asineDHJ01 | Pyrginae  | 08-SRNP-24005 | MHMYB134-09    | GU649691          |
| 356        | Polythrix asineDHJ02 | Pyrginae  | 00-SRNP-6701  | MHAHI437-06    | GU156158          |
| 357        | Polythrix asineDHJ02 | Pyrginae  | 01-SRNP-17366 | MHAHI413-06    | GU156190          |
| 358        | Polythrix asineDHJ02 | Pyrginae  | 00-SRNP-6215  | MHAHI434-06    | GU156183          |
| 359        | Polythrix asineDHJ02 | Pyrginae  | 02-SRNP-13219 | MHAHI388-06    | GU156180          |
| 360        | Polythrix asineDHJ02 | Pyrginae  | 02-SRNP-10303 | MHAHI404-06    | GU156225          |
| 361        | Polythrix asineDHJ02 | Pyrginae  | 98-SRNP-4205  | MHAHI353-06    | GU156203          |
| 362        | Polythrix asineDHJ02 | Pyrginae  | 93-SRNP-3543  | MHAHI1014-07   | GU156199          |
| 363        | Polythrix asineDHJ02 | Pyrginae  | 94-SRNP-5275  | MHAHI363-06    | GU156157          |
| 364        | Polythrix asineDHJ02 | Pyrginae  | 92-SRNP-204   | MHAHI1034-07   | GU156216          |
| 365        | Polythrix asineDHJ02 | Pyrginae  | 96-SRNP-957   | MHAHI1035-07   | GU156218          |
| 366        | Polythrix asineDHJ02 | Pyrginae  | 08-SRNP-2064  | MHMXW493-09    | JF754092          |
| 367        | Polythrix asineDHJ02 | Pyrginae  | 00-SRNP-6572  | MHAHI460-06    | GU156170          |
| 368        | Polythrix asineDHJ02 | Pyrginae  | 00-SRNP-6495  | MHAHI1000-07   | GU156205          |
| 369        | Polythrix asineDHJ02 | Pyrginae  | 07-SRNP-55549 | MHMXK276-07    | JF762658          |
| 370        | Polythrix asineDHJ02 | Pyrginae  | 99-SRNP-6082  | MHAHI459-06    | GU156172          |
| 371        | Polythrix asineDHJ02 | Pyrginae  | 99-SRNP-6074  | MHAHI453-06    | GU156175          |
| 372        | Polythrix asineDHJ02 | Pyrginae  | 00-SRNP-6949  | MHAHI452-06    | GU156234          |
| 373        | Polythrix asineDHJ02 | Pyrginae  | 00-SRNP-7137  | MHAHI447-06    | GU156223          |
| 374        | Polythrix asineDHJ02 | Pyrginae  | 03-SRNP-18566 | MHAHI427-06    | GU156186          |
| 375        | Polythrix asineDHJ02 | Pyrginae  | 03-SRNP-14435 | MHAHI420-06    | GU156230          |
| 376        | Polythrix asineDHJ02 | Pyrginae  | 02-SRNP-32223 | MHAHI385-06    | GU156151          |
| 377        | Polythrix asineDHJ02 | Pyrginae  | 00-SRNP-3211  | MHAHI376-06    | GU156155          |
| 378        | Polythrix asineDHJ02 | Pyrginae  | 94-SRNP-710   | MHAHI359-06    | GU156159          |
| 379        | Polythrix asineDHJ02 | Pyrginae  | 02-SRNP-10034 | MHAHI412-06    | GU156221          |
| 380        | Polythrix asineDHJ02 | Pyrginae  | 97-SRNP-3363  | MHAHI380-06    | GU156153          |
| 381        | Polythrix asineDHJ02 | Pyrginae  | 00-SRNP-6388  | MHAHI997-07    | GU156152          |
| 382        | Polythrix asineDHJ02 | Pyrginae  | 00-SRNP-6950  | MHAHI1003-07   | GU156189          |
| 383        | Polythrix asineDHJ02 | Pyrginae  | 05-SRNP-61346 | MHAHF740-06    | GU150714          |
| 384        | Polythrix asineDHJ02 | Pyrginae  | 94-SRNP-711   | MHAHC485-05    | DQ293070          |
| 385        | Polythrix asineDHJ02 | Pyrginae  | 05-SRNP-59292 | MHAHF296-06    | GU150715          |
| 386        | Polythrix asineDHJ02 | Pyrginae  | 93-SRNP-3930  | MHAHI1044-07   | GU156222          |
| 387        | Polythrix asineDHJ02 | Pyrginae  | 93-SRNP-3398  | MHAHI1016-07   | GU156200          |
| 388        | Polythrix asineDHJ02 | Pyrginae  | 92-SRNP-5429  | MHAHC483-05    | DQ293069          |
| 389        | Polythrix asineDHJ02 | Pyrginae  | 91-SRNP-167   | MHAHI1021-07   | GU156204          |
| 390        | Polythrix asineDHJ02 | Pyrginae  | 92-SRNP-4524  | MHAHI1048-07   | GU156166          |
| 391        | Polythrix asineDHJ02 | Pyrginae  | 94-SRNP-699   | MHAHI1050-07   | GU156167          |

| <b>Tree Order</b> | <b>Species</b>       | <b>Subfamily</b> | <b>ACG Sampleid</b> | <b>BOLD Processid</b> | <b>Genbank Accession</b> |
|-------------------|----------------------|------------------|---------------------|-----------------------|--------------------------|
| 392               | Polythrix asineDHJ02 | Pyrginae         | 08-SRNP-56062       | MHMXX627-09           | JF778409                 |
| 393               | Polythrix asineDHJ02 | Pyrginae         | 08-SRNP-14903       | MHMXY950-09           | GU666574                 |
| 394               | Polythrix asineDHJ02 | Pyrginae         | 02-SRNP-10068       | MHAHI398-06           | GU156229                 |
| 395               | Polythrix asineDHJ02 | Pyrginae         | 01-SRNP-12056       | MHAHI1004-07          | GU156226                 |
| 396               | Polythrix asineDHJ02 | Pyrginae         | 04-SRNP-21235       | MHAHC084-05           | DQ293057                 |
| 397               | Polythrix asineDHJ02 | Pyrginae         | 93-SRNP-4231        | MHAHI1046-07          | GU156227                 |
| 398               | Polythrix asineDHJ02 | Pyrginae         | 07-SRNP-55640       | MHMXXK272-07          | JF762661                 |
| 399               | Polythrix asineDHJ02 | Pyrginae         | 93-SRNP-4239        | MHAHI1040-07          | GU156214                 |
| 400               | Polythrix asineDHJ02 | Pyrginae         | 99-SRNP-6119        | MHAHI455-06           | GU156171                 |
| 401               | Polythrix asineDHJ02 | Pyrginae         | 00-SRNP-7038        | MHAHI442-06           | GU156178                 |
| 402               | Polythrix asineDHJ02 | Pyrginae         | 93-SRNP-61          | MHAHI369-06           | GU156209                 |
| 403               | Polythrix asineDHJ02 | Pyrginae         | 92-SRNP-5030        | MHAHI1041-07          | GU156215                 |
| 404               | Polythrix asineDHJ02 | Pyrginae         | 93-SRNP-3635        | MHAHI1045-07          | GU156224                 |
| 405               | Polythrix asineDHJ02 | Pyrginae         | 97-SRNP-3311        | MHAHI1051-07          | GU156168                 |
| 406               | Polythrix asineDHJ02 | Pyrginae         | 08-SRNP-21270       | MHMWX492-09           | JF754091                 |
| 407               | Polythrix asineDHJ02 | Pyrginae         | 90-SRNP-2362        | MHAHI1023-07          | GU156210                 |
| 408               | Polythrix asineDHJ02 | Pyrginae         | 03-SRNP-151         | MHAHI421-06           | GU156162                 |
| 409               | Polythrix asineDHJ02 | Pyrginae         | 01-SRNP-17146       | MHAHI407-06           | GU156217                 |
| 410               | Polythrix asineDHJ02 | Pyrginae         | 00-SRNP-7129        | MHAHI435-06           | GU156182                 |
| 411               | Polythrix asineDHJ02 | Pyrginae         | 00-SRNP-2525        | MHAHI1006-07          | GU156188                 |
| 412               | Polythrix asineDHJ02 | Pyrginae         | 97-SRNP-5334        | MHAHI360-06           | GU156160                 |
| 413               | Polythrix asineDHJ02 | Pyrginae         | 91-SRNP-2264        | MHAHI1002-07          | GU156181                 |
| 414               | Polythrix asineDHJ02 | Pyrginae         | 96-SRNP-10685       | MHAHI1018-07          | GU156196                 |
| 415               | Polythrix asineDHJ02 | Pyrginae         | 07-SRNP-56772       | MHMXXK270-07          | JF762662                 |
| 416               | Polythrix asineDHJ02 | Pyrginae         | 00-SRNP-20213       | MHAHI1007-07          | GU156207                 |
| 417               | Polythrix asineDHJ02 | Pyrginae         | 03-SRNP-949         | MHAHI418-06           | GU156208                 |
| 418               | Polythrix asineDHJ02 | Pyrginae         | 01-SRNP-18761       | MHAHI393-06           | GU156233                 |
| 419               | Polythrix asineDHJ02 | Pyrginae         | 03-SRNP-25832       | MHAHI417-06           | GU156197                 |
| 420               | Polythrix asineDHJ02 | Pyrginae         | 99-SRNP-6164        | MHAHI454-06           | GU156176                 |
| 421               | Polythrix asineDHJ02 | Pyrginae         | 01-SRNP-12169       | CSRII143-04           | DQ293049                 |
| 422               | Polythrix asineDHJ02 | Pyrginae         | 00-SRNP-7100        | MHAHI458-06           | GU156173                 |
| 423               | Polythrix asineDHJ02 | Pyrginae         | 00-SRNP-2164        | MHAHI450-06           | GU156174                 |
| 424               | Polythrix asineDHJ02 | Pyrginae         | 97-SRNP-10070       | MHAHC471-05           | DQ293061                 |
| 425               | Polythrix asineDHJ02 | Pyrginae         | 07-SRNP-55609       | MHMXXK273-07          | JF762660                 |
| 426               | Polythrix asineDHJ02 | Pyrginae         | 06-SRNP-47913       | MHMXXH839-07          | JF761058                 |
| 427               | Polythrix asineDHJ02 | Pyrginae         | 00-SRNP-2609        | MHAHI448-06           | GU156177                 |
| 428               | Polythrix asineDHJ02 | Pyrginae         | 00-SRNP-17652       | MHAHI443-06           | GU156232                 |
| 429               | Polythrix asineDHJ02 | Pyrginae         | 00-SRNP-6951        | MHAHI438-06           | GU156179                 |
| 430               | Polythrix asineDHJ02 | Pyrginae         | 00-SRNP-6013        | MHAHI436-06           | GU156161                 |
| 431               | Polythrix asineDHJ02 | Pyrginae         | 00-SRNP-6014        | MHAHI432-06           | GU156150                 |
| 432               | Polythrix asineDHJ02 | Pyrginae         | 03-SRNP-678         | MHAHI428-06           | GU156185                 |
| 433               | Polythrix asineDHJ02 | Pyrginae         | 03-SRNP-14568       | MHAHI426-06           | GU156184                 |
| 434               | Polythrix asineDHJ02 | Pyrginae         | 03-SRNP-155         | MHAHI422-06           | GU156163                 |
| 435               | Polythrix asineDHJ02 | Pyrginae         | 02-SRNP-32221       | MHAHI416-06           | GU156212                 |
| 436               | Polythrix asineDHJ02 | Pyrginae         | 02-SRNP-5741        | MHAHI411-06           | GU156219                 |
| 437               | Polythrix asineDHJ02 | Pyrginae         | 01-SRNP-16459       | MHAHI397-06           | GU156231                 |
| 438               | Polythrix asineDHJ02 | Pyrginae         | 02-SRNP-13312       | MHAHI396-06           | GU156228                 |
| 439               | Polythrix asineDHJ02 | Pyrginae         | 06-SRNP-21342       | MHAHH561-06           | GU155459                 |
| 440               | Polythrix asineDHJ02 | Pyrginae         | 06-SRNP-12614       | MHAHG720-06           | GU151577                 |
| 441               | Polythrix asineDHJ02 | Pyrginae         | 05-SRNP-64404       | MHAHG660-06           | GU151576                 |
| 442               | Polythrix asineDHJ02 | Pyrginae         | 04-SRNP-14469       | MHAHE169-05           | GU149856                 |
| 443               | Polythrix asineDHJ02 | Pyrginae         | 04-SRNP-45139       | MHAHC028-05           | DQ293054                 |
| 444               | Polythrix asineDHJ02 | Pyrginae         | 04-SRNP-2256        | MHAHC076-05           | DQ293056                 |
| 445               | Polythrix asineDHJ02 | Pyrginae         | 00-SRNP-6483        | MHAHI375-06           | GU156154                 |
| 446               | Polythrix asineDHJ02 | Pyrginae         | 05-SRNP-21368       | MHAHF297-06           | GU150717                 |
| 447               | Polythrix asineDHJ02 | Pyrginae         | 93-SRNP-4178        | MHAHI1015-07          | GU156198                 |



| Tree Order | Species              | Subfamily | ACG Sampleid  | BOLD Processid | Genbank Accession |
|------------|----------------------|-----------|---------------|----------------|-------------------|
| 448        | Polythrix asineDHJ02 | Pyrginae  | 92-SRNP-5058  | MHAHI352-06    | GU156202          |
| 449        | Polythrix asineDHJ02 | Pyrginae  | 05-SRNP-4485  | MHAHF295-06    | GU150716          |
| 450        | Polythrix asineDHJ02 | Pyrginae  | 93-SRNP-4516  | MHAHC480-05    | DQ293067          |
| 451        | Polythrix asineDHJ02 | Pyrginae  | 93-SRNP-4921  | MHAHI371-06    | GU156156          |
| 452        | Polythrix asineDHJ02 | Pyrginae  | 06-SRNP-46210 | MHAHI130-06    | GU156164          |
| 453        | Polythrix asineDHJ02 | Pyrginae  | 94-SRNP-6175  | MHAHI1037-07   | GU156195          |
| 454        | Polythrix asineDHJ02 | Pyrginae  | 01-SRNP-12150 | MHAHI1010-07   | GU156191          |
| 455        | Polythrix asineDHJ02 | Pyrginae  | 94-SRNP-7825  | MHAHI373-06    | GU156211          |
| 456        | Polythrix asineDHJ02 | Pyrginae  | 90-SRNP-1709  | MHAHC477-05    | DQ293065          |
| 457        | Polythrix asineDHJ02 | Pyrginae  | 92-SRNP-4667  | MHAHC476-05    | DQ293064          |
| 458        | Polythrix asineDHJ02 | Pyrginae  | 92-SRNP-4160  | MHAHI1049-07   | GU156165          |
| 459        | Polythrix asineDHJ02 | Pyrginae  | 99-SRNP-6176  | MHAHI1011-07   | GU156192          |
| 460        | Polythrix asineDHJ02 | Pyrginae  | 03-SRNP-1811  | MHAHI419-06    | GU156187          |
| 461        | Polythrix asineDHJ02 | Pyrginae  | 93-SRNP-4316  | MHAHI1017-07   | GU156201          |
| 462        | Polythrix asineDHJ02 | Pyrginae  | 97-SRNP-5248  | MHAHI1013-07   | GU156194          |
| 463        | Polythrix asineDHJ02 | Pyrginae  | 98-SRNP-4204  | MHAHI1033-07   | GU156213          |
| 464        | Polythrix asineDHJ02 | Pyrginae  | 91-SRNP-2273  | MHAHI355-06    | GU156206          |
| 465        | Polythrix asineDHJ02 | Pyrginae  | 92-SRNP-4981  | MHAHI1019-07   | GU156193          |
| 466        | Polythrix asineDHJ02 | Pyrginae  | 93-SRNP-22    | MHAHI1043-07   | GU156220          |
| 467        | Polythrix asineDHJ02 | Pyrginae  | 98-SRNP-4007  | MHAHI1054-07   | GU156169          |
| 468        | Polythrix asineDHJ02 | Pyrginae  | 07-SRNP-12116 | MHMXK274-07    | JF762659          |
| 469        | Polythrix asineDHJ02 | Pyrginae  | 08-SRNP-21704 | MHMXW494-09    | JF754093          |
| 470        | Polythrix asineDHJ02 | Pyrginae  | 08-SRNP-4981  | MHMXX628-09    | JF778410          |
| 471        | Polythrix asineDHJ02 | Pyrginae  | 09-SRNP-14247 | MHMYE869-09    | GU653732          |
| 472        | Polythrix caunus     | Pyrginae  | 06-SRNP-48047 | MHMXH838-07    | JF761059          |
| 473        | Polythrix caunus     | Pyrginae  | 05-SRNP-41335 | MHAHF354-06    | GU150721          |
| 474        | Polythrix caunus     | Pyrginae  | 07-SRNP-45093 | MHMXK330-07    | JF762667          |
| 475        | Polythrix caunus     | Pyrginae  | 07-SRNP-45094 | MHMXK329-07    | JF762668          |
| 476        | Polythrix caunus     | Pyrginae  | 06-SRNP-46961 | MHAHJ644-07    | JF753082          |
| 477        | Polythrix caunus     | Pyrginae  | 97-SRNP-411   | MHAHI265-06    | GU156242          |
| 478        | Polythrix caunus     | Pyrginae  | 00-SRNP-3976  | MHAHI260-06    | GU156240          |
| 479        | Polythrix caunus     | Pyrginae  | 01-SRNP-9329  | MHAHI257-06    | GU156251          |
| 480        | Polythrix caunus     | Pyrginae  | 01-SRNP-11831 | MHAHI256-06    | GU156250          |
| 481        | Polythrix caunus     | Pyrginae  | 01-SRNP-9037  | MHAHI255-06    | GU156249          |
| 482        | Polythrix caunus     | Pyrginae  | 02-SRNP-6762  | MHAHI253-06    | GU156244          |
| 483        | Polythrix caunus     | Pyrginae  | 04-SRNP-45147 | MHAHI248-06    | GU156245          |
| 484        | Polythrix caunus     | Pyrginae  | 05-SRNP-61208 | MHAHF741-06    | GU150723          |
| 485        | Polythrix caunus     | Pyrginae  | 04-SRNP-49813 | MHAHE238-05    | GU149862          |
| 486        | Polythrix caunus     | Pyrginae  | 04-SRNP-47482 | MHAHE237-05    | GU149863          |
| 487        | Polythrix caunus     | Pyrginae  | 04-SRNP-13678 | MHAHE236-05    | GU149858          |
| 488        | Polythrix caunus     | Pyrginae  | 04-SRNP-56145 | MHAHE235-05    | GU149859          |
| 489        | Polythrix caunus     | Pyrginae  | 04-SRNP-49793 | MHAHE234-05    | GU149860          |
| 490        | Polythrix caunus     | Pyrginae  | 04-SRNP-48326 | MHAHE233-05    | GU149861          |
| 491        | Polythrix caunus     | Pyrginae  | 06-SRNP-47938 | MHMXH841-07    | JF761060          |
| 492        | Polythrix caunus     | Pyrginae  | 05-SRNP-40491 | MHAHF353-06    | GU150722          |
| 493        | Polythrix caunus     | Pyrginae  | 03-SRNP-1670  | CSCR396-04     | DQ293075          |
| 494        | Polythrix caunus     | Pyrginae  | 97-SRNP-5432  | MHAHI263-06    | GU156248          |
| 495        | Polythrix caunus     | Pyrginae  | 00-SRNP-18463 | MHAHI259-06    | GU156239          |
| 496        | Polythrix caunus     | Pyrginae  | 01-SRNP-9142  | MHAHI250-06    | GU156246          |
| 497        | Polythrix caunus     | Pyrginae  | 01-SRNP-9036  | MHAHI249-06    | GU156243          |
| 498        | Polythrix caunus     | Pyrginae  | 03-SRNP-1437  | CSCR395-04     | DQ293074          |
| 499        | Polythrix caunus     | Pyrginae  | 02-SRNP-4214  | MHAHI252-06    | GU156247          |
| 500        | Polythrix caunus     | Pyrginae  | 96-SRNP-230   | MHAHI264-06    | GU156241          |
| 501        | Polythrix caunus     | Pyrginae  | 07-SRNP-46448 | MHMXT183-08    | JF762666          |
| 502        | Polythrix caunus     | Pyrginae  | 07-SRNP-47110 | MHMXT184-08    | JF762665          |
| 503        | Polythrix caunus     | Pyrginae  | 08-SRNP-31055 | MHMXW485-09    | JF754095          |

| <b>Tree Order</b> | <b>Species</b>          | <b>Subfamily</b> | <b>ACG Sampleid</b> | <b>BOLD Processid</b> | <b>Genbank Accession</b> |
|-------------------|-------------------------|------------------|---------------------|-----------------------|--------------------------|
| 504               | Polythrix caunus        | Pyrginae         | 08-SRNP-2598        | MHMXW486-09           | JF754096                 |
| 505               | Polythrix caunus        | Pyrginae         | 08-SRNP-2600        | MHMXW487-09           | JF754097                 |
| 506               | Polythrix caunus        | Pyrginae         | 08-SRNP-2433        | MHMXW488-09           | JF754098                 |
| 507               | Polythrix caunus        | Pyrginae         | 08-SRNP-2599        | MHMXW490-09           | JF754099                 |
| 508               | Chrysoplectrum Burns02  | Pyrginae         | 03-SRNP-20727       | CSCR347-04            | DQ292147                 |
| 509               | Polythrix octomaculata  | Pyrginae         | 01-SRNP-18777       | CSRII153-04           | DQ293086                 |
| 510               | Polythrix octomaculata  | Pyrginae         | 04-SRNP-16187       | MHAHE149-05           | GU149866                 |
| 511               | Polythrix octomaculata  | Pyrginae         | 06-SRNP-55510       | MHAHG132-06           | GU151578                 |
| 512               | Polythrix octomaculata  | Pyrginae         | 06-SRNP-58092       | MHAHJ718-07           | JF753085                 |
| 513               | Polythrix octomaculata  | Pyrginae         | 08-SRNP-2053        | MHMXW475-09           | JF754100                 |
| 514               | Polythrix octomaculata  | Pyrginae         | 01-SRNP-12143       | CSRII152-04           | DQ293085                 |
| 515               | Polythrix octomaculata  | Pyrginae         | 06-SRNP-55601       | MHAHG185-06           | GU151582                 |
| 516               | Polythrix octomaculata  | Pyrginae         | 04-SRNP-16188       | MHAHE150-05           | GU149865                 |
| 517               | Polythrix octomaculata  | Pyrginae         | 06-SRNP-55352       | MHAHG186-06           | GU151581                 |
| 518               | Polythrix octomaculata  | Pyrginae         | 06-SRNP-55424       | MHAHG187-06           | GU151580                 |
| 519               | Polythrix octomaculata  | Pyrginae         | 06-SRNP-55112       | MHAHG133-06           | GU151579                 |
| 520               | Polythrix octomaculata  | Pyrginae         | 09-SRNP-55230       | MHMYE888-09           | GU653715                 |
| 521               | Polythrix auginus       | Pyrginae         | 08-SRNP-5805        | MHMXY951-09           | HM390686                 |
| 522               | Polythrix auginus       | Pyrginae         | 99-SRNP-2513        | MHAHI262-06           | GU156236                 |
| 523               | Polythrix auginus       | Pyrginae         | 01-SRNP-4476        | MHAHI247-06           | GU156237                 |
| 524               | Polythrix auginus       | Pyrginae         | 02-SRNP-5395        | MHAHI251-06           | GU156238                 |
| 525               | Polythrix auginus       | Pyrginae         | 05-SRNP-40942       | MHAHF358-06           | GU150720                 |
| 526               | Polythrix auginus       | Pyrginae         | 05-SRNP-40943       | MHAHF357-06           | GU150719                 |
| 527               | Polythrix auginus       | Pyrginae         | 07-SRNP-23809       | MHMXT185-08           | JF762663                 |
| 528               | Polythrix auginus       | Pyrginae         | 07-SRNP-23808       | MHMXR920-08           | JF762664                 |
| 529               | Polythrix auginus       | Pyrginae         | 02-SRNP-7476        | MHAHI261-06           | GU156235                 |
| 530               | Polythrix auginus       | Pyrginae         | 00-SRNP-21098       | CSRII144-04           | DQ293073                 |
| 531               | Polythrix auginus       | Pyrginae         | 08-SRNP-2432        | MHMXW489-09           | JF754094                 |
| 532               | Polythrix auginus       | Pyrginae         | 08-SRNP-32652       | MHMXY952-09           |                          |
| 533               | Polythrix auginus       | Pyrginae         | 09-SRNP-71706       | MHMYE1461-09          | HQ992248                 |
| 534               | Chrysoplectrum pervivax | Pyrginae         | 08-SRNP-55673       | MHMXW549-09           | JF753821                 |
| 535               | Chrysoplectrum pervivax | Pyrginae         | 07-SRNP-55670       | MHMXXK057-07          | JF761949                 |
| 536               | Chrysoplectrum pervivax | Pyrginae         | 06-SRNP-55724       | MHAHH574-06           | GU155331                 |
| 537               | Chrysoplectrum pervivax | Pyrginae         | 06-SRNP-55725       | MHAHH573-06           | GU155332                 |
| 538               | Chrysoplectrum pervivax | Pyrginae         | 05-SRNP-55019       | MHAHC812-05           | DQ292153                 |
| 539               | Chrysoplectrum pervivax | Pyrginae         | 05-SRNP-55012       | MHAHC787-05           | DQ292152                 |
| 540               | Chrysoplectrum pervivax | Pyrginae         | 03-SRNP-599         | CSCR349-04            | DQ292149                 |
| 541               | Chrysoplectrum pervivax | Pyrginae         | 03-SRNP-27771       | CSCR500-04            | DQ292151                 |
| 542               | Chrysoplectrum pervivax | Pyrginae         | 05-SRNP-12099       | MHAHF251-06           | GU150335                 |
| 543               | Chrysoplectrum pervivax | Pyrginae         | 06-SRNP-55633       | MHAHG135-06           | GU151304                 |
| 544               | Chrysoplectrum pervivax | Pyrginae         | 03-SRNP-285         | CSCR348-04            | DQ292148                 |
| 545               | Chrysoplectrum pervivax | Pyrginae         | 03-SRNP-27214       | CSCR499-04            | DQ292150                 |
| 546               | Chrysoplectrum pervivax | Pyrginae         | 06-SRNP-55678       | MHAHH572-06           | GU155333                 |
| 547               | Chrysoplectrum pervivax | Pyrginae         | 08-SRNP-55510       | MHMXW550-09           | JF753822                 |
| 548               | Chrysoplectrum pervivax | Pyrginae         | 08-SRNP-55708       | MHMXW551-09           | JF753823                 |
| 549               | Chrysoplectrum pervivax | Pyrginae         | 08-SRNP-55674       | MHMXW553-09           | JF753824                 |
| 550               | Chrysoplectrum Burns01  | Pyrginae         | 05-SRNP-20359       | MHAHC810-05           | DQ292143                 |
| 551               | Chrysoplectrum Burns01  | Pyrginae         | 03-SRNP-21246       | CSCR496-04            | DQ292139                 |
| 552               | Chrysoplectrum Burns01  | Pyrginae         | 08-SRNP-41220       | MHMXX487-09           | GU666364                 |
| 553               | Chrysoplectrum Burns01  | Pyrginae         | 08-SRNP-71264       | MHMXY1097-09          | GU666445                 |
| 554               | Chrysoplectrum Burns01  | Pyrginae         | 08-SRNP-71263       | MHMXY1113-09          | GU666428                 |
| 555               | Chrysoplectrum Burns01  | Pyrginae         | 07-SRNP-65253       | MHAHL563-07           | JF761941                 |
| 556               | Chrysoplectrum Burns01  | Pyrginae         | 03-SRNP-5985        | CSCR346-04            | DQ292138                 |
| 557               | Chrysoplectrum Burns01  | Pyrginae         | 07-SRNP-65263       | MHMXP169-08           | JF761945                 |
| 558               | Chrysoplectrum Burns01  | Pyrginae         | 04-SRNP-33618       | MHAHC814-05           | DQ292146                 |
| 559               | Chrysoplectrum Burns01  | Pyrginae         | 04-SRNP-41884       | MHAHC813-05           | DQ292145                 |

| Tree Order | Species                | Subfamily | ACG Sampleid  | BOLD Processid | Genbank Accession |
|------------|------------------------|-----------|---------------|----------------|-------------------|
| 560        | Chrysoplectrum Burns01 | Pyrginae  | 04-SRNP-60797 | MHAHC811-05    | DQ292144          |
| 561        | Chrysoplectrum Burns01 | Pyrginae  | 04-SRNP-60793 | MHAHC809-05    | DQ292142          |
| 562        | Chrysoplectrum Burns01 | Pyrginae  | 04-SRNP-60305 | MHAHC808-05    | DQ292141          |
| 563        | Chrysoplectrum Burns01 | Pyrginae  | 03-SRNP-10713 | CSCR345-04     | DQ292137          |
| 564        | Chrysoplectrum Burns01 | Pyrginae  | 03-SRNP-30510 | CSCR498-04     | DQ292140          |
| 565        | Chrysoplectrum Burns01 | Pyrginae  | 07-SRNP-41409 | MHMXN287-07    | JF761948          |
| 566        | Chrysoplectrum Burns01 | Pyrginae  | 07-SRNP-21008 | MHMXN290-07    | JF761947          |
| 567        | Chrysoplectrum Burns01 | Pyrginae  | 07-SRNP-65264 | MHMXP168-08    | JF761946          |
| 568        | Chrysoplectrum Burns01 | Pyrginae  | 07-SRNP-65771 | MHMXR736-08    | JF761944          |
| 569        | Chrysoplectrum Burns01 | Pyrginae  | 07-SRNP-65755 | MHMXR737-08    | JF761943          |
| 570        | Chrysoplectrum Burns01 | Pyrginae  | 07-SRNP-65394 | MHMXR738-08    | JF761942          |
| 571        | Chrysoplectrum Burns01 | Pyrginae  | 08-SRNP-71635 | MHMXW552-09    | JF753820          |
| 572        | Chrysoplectrum Burns01 | Pyrginae  | 08-SRNP-71122 | MHMXX488-09    | JF777767          |
| 573        | Chrysoplectrum Burns01 | Pyrginae  | 08-SRNP-71266 | MHMXX489-09    | JF777768          |
| 574        | Chrysoplectrum Burns01 | Pyrginae  | 08-SRNP-71123 | MHMXY1099-09   | GU666439          |
| 575        | Chrysoplectrum Burns01 | Pyrginae  | 09-SRNP-69180 | MHMYE1523-09   | HM391083          |
| 576        | Chrysoplectrum Burns01 | Pyrginae  | 09-SRNP-22283 | MHMYG2406-10   | HM885828          |
| 577        | Chrysoplectrum Burns01 | Pyrginae  | 09-SRNP-41395 | MHMYG2408-10   | HM885830          |
| 578        | Paches loxus           | Pyrginae  | 02-SRNP-5725  | CSCR172-04     | DQ292821          |
| 579        | Paches loxus           | Pyrginae  | 02-SRNP-5985  | CSCR173-04     | DQ292822          |
| 580        | Paches loxus           | Pyrginae  | 03-SRNP-30995 | MHAHJ284-07    | JF752951          |
| 581        | Paches loxus           | Pyrginae  | 06-SRNP-55156 | MHAHG219-06    | GU151512          |
| 582        | Paches loxus           | Pyrginae  | 02-SRNP-5727  | MHAHJ282-07    | JF752949          |
| 583        | Paches loxus           | Pyrginae  | 02-SRNP-5726  | MHAHJ283-07    | JF752950          |
| 584        | Paches loxus           | Pyrginae  | 03-SRNP-30840 | MHAHJ285-07    | JF752952          |
| 585        | Paches loxus           | Pyrginae  | 03-SRNP-30960 | MHAHJ286-07    | JF752953          |
| 586        | Paches loxus           | Pyrginae  | 02-SRNP-5742  | MHAHJ288-07    | JF752955          |
| 587        | Paches loxus           | Pyrginae  | 02-SRNP-5517  | MHAHJ289-07    | JF752956          |
| 588        | Paches loxus           | Pyrginae  | 02-SRNP-5724  | MHAHJ290-07    | JF752957          |
| 589        | Paches loxus           | Pyrginae  | 07-SRNP-60833 | MHMXR775-08    | JF762503          |
| 590        | Paches loxus           | Pyrginae  | 07-SRNP-60825 | MHMXR776-08    | JF762502          |
| 591        | Paches loxus           | Pyrginae  | 04-SRNP-15261 | MHAHF075-06    | GU150646          |
| 592        | Paches loxus           | Pyrginae  | 02-SRNP-14194 | MHAHJ287-07    | JF752954          |
| 593        | Paches loxus           | Pyrginae  | 02-SRNP-5743  | MHAHJ291-07    | JF752958          |
| 594        | Paches loxus           | Pyrginae  | 07-SRNP-60964 | MHMXR777-08    | JF762501          |
| 595        | Phanus marshalliiDHJ01 | Pyrginae  | 03-SRNP-10532 | MHAHJ225-07    | JF752983          |
| 596        | Phanus marshalliiDHJ01 | Pyrginae  | 03-SRNP-5739  | MHAHJ222-07    | JF752981          |
| 597        | Phanus marshalliiDHJ01 | Pyrginae  | 03-SRNP-5850  | MHAHJ226-07    | JF752984          |
| 598        | Phanus marshalliiDHJ01 | Pyrginae  | 03-SRNP-16237 | MHAHJ224-07    | JF752982          |
| 599        | Phanus marshalliiDHJ01 | Pyrginae  | 03-SRNP-5857  | MHAHJ227-07    | JF752985          |
| 600        | Phanus marshalliiDHJ02 | Pyrginae  | 08-SRNP-2311  | MHMXW353-09    | JF754044          |
| 601        | Phanus marshalliiDHJ02 | Pyrginae  | 08-SRNP-21884 | MHMXW345-09    | JF754043          |
| 602        | Phanus marshalliiDHJ02 | Pyrginae  | 07-SRNP-21440 | MHAHL560-07    | JF762578          |
| 603        | Phanus marshalliiDHJ02 | Pyrginae  | 02-SRNP-14543 | MHAHJ221-07    | JF752987          |
| 604        | Phanus marshalliiDHJ02 | Pyrginae  | 02-SRNP-2186  | MHAHJ220-07    | JF752986          |
| 605        | Phanus marshalliiDHJ02 | Pyrginae  | 03-SRNP-16236 | MHAHJ223-07    | JF752988          |
| 606        | Phanus marshalliiDHJ02 | Pyrginae  | 03-SRNP-16234 | MHAHJ228-07    | JF752989          |
| 607        | Phanus marshalliiDHJ02 | Pyrginae  | 05-SRNP-2028  | MHAHF547-06    | GU150678          |
| 608        | Phanus marshalliiDHJ02 | Pyrginae  | 02-SRNP-2185  | CSCR185-04     | DQ292962          |
| 609        | Phanus marshalliiDHJ02 | Pyrginae  | 01-SRNP-14963 | CSCR184-04     | DQ292961          |
| 610        | Phanus marshalliiDHJ02 | Pyrginae  | 08-SRNP-21663 | MHMXW360-09    | JF754046          |
| 611        | Phanus obscurior       | Pyrginae  | 02-SRNP-1685  | MHAHJ219-07    | JF752997          |
| 612        | Phanus obscurior       | Pyrginae  | 08-SRNP-1691  | MHMXW351-09    | JF754049          |
| 613        | Phanus obscurior       | Pyrginae  | 08-SRNP-1692  | MHMXW357-09    | JF754050          |
| 614        | Phanus obscurior       | Pyrginae  | 03-SRNP-6083  | MHAHJ212-07    | JF752990          |
| 615        | Phanus obscurior       | Pyrginae  | 04-SRNP-60040 | MHAHC820-05    | DQ292965          |

| <b>Tree Order</b> | <b>Species</b>      | <b>Subfamily</b> | <b>ACG Sampleid</b> | <b>BOLD Processid</b> | <b>Genbank Accession</b> |
|-------------------|---------------------|------------------|---------------------|-----------------------|--------------------------|
| 616               | Phanus obscurior    | Pyrginae         | 06-SRNP-22131       | MHAHJ766-07           | JF753000                 |
| 617               | Phanus obscurior    | Pyrginae         | 06-SRNP-22126       | MHAHJ596-07           | JF752999                 |
| 618               | Phanus obscurior    | Pyrginae         | 06-SRNP-22146       | MHAHJ565-07           | JF752998                 |
| 619               | Phanus obscurior    | Pyrginae         | 02-SRNP-3622        | MHAHJ218-07           | JF752996                 |
| 620               | Phanus obscurior    | Pyrginae         | 02-SRNP-3270        | MHAHJ217-07           | JF752995                 |
| 621               | Phanus obscurior    | Pyrginae         | 02-SRNP-17173       | MHAHJ216-07           | JF752994                 |
| 622               | Phanus obscurior    | Pyrginae         | 03-SRNP-5866        | MHAHJ214-07           | JF752992                 |
| 623               | Phanus obscurior    | Pyrginae         | 05-SRNP-1856        | MHAHF550-06           | GU150679                 |
| 624               | Phanus obscurior    | Pyrginae         | 03-SRNP-5851        | MHAHJ213-07           | JF752991                 |
| 625               | Phanus obscurior    | Pyrginae         | 06-SRNP-22124       | MHAHJ769-07           | JF753003                 |
| 626               | Phanus obscurior    | Pyrginae         | 06-SRNP-22129       | MHAHJ873-07           | JF753004                 |
| 627               | Phanus obscurior    | Pyrginae         | 08-SRNP-1581        | MHMXW347-09           | JF754048                 |
| 628               | Phanus obscurior    | Pyrginae         | 08-SRNP-1580        | MHMXW358-09           | JF754051                 |
| 629               | Phanus obscurior    | Pyrginae         | 08-SRNP-4668        | MHMXX572-09           | JF778382                 |
| 630               | Phanus obscurior    | Pyrginae         | 08-SRNP-1112        | MHMXW341-09           | JF754047                 |
| 631               | Phanus obscurior    | Pyrginae         | 00-SRNP-870         | CSCR186-04            | DQ292963                 |
| 632               | Phanus obscurior    | Pyrginae         | 02-SRNP-2466        | CSCR187-04            | DQ292964                 |
| 633               | Phanus obscurior    | Pyrginae         | 06-SRNP-22134       | MHAHJ767-07           | JF753001                 |
| 634               | Phanus obscurior    | Pyrginae         | 07-SRNP-2619        | MHAHL561-07           | JF762579                 |
| 635               | Phanus obscurior    | Pyrginae         | 06-SRNP-22127       | MHAHJ768-07           | JF753002                 |
| 636               | Phanus obscurior    | Pyrginae         | 06-SRNP-3813        | MHAHI160-06           | GU156076                 |
| 637               | Phanus obscurior    | Pyrginae         | 06-SRNP-3624        | MHAHH430-06           | GU155451                 |
| 638               | Phanus obscurior    | Pyrginae         | 04-SRNP-60913       | MHAHC821-05           | DQ292966                 |
| 639               | Phanus obscurior    | Pyrginae         | 06-SRNP-34130       | MHAHI514-06           | GU156075                 |
| 640               | Phanus obscurior    | Pyrginae         | 02-SRNP-2470        | MHAHJ215-07           | JF752993                 |
| 641               | Phanus obscurior    | Pyrginae         | 08-SRNP-4659        | MHMXX573-09           | JF778383                 |
| 642               | Phanus vitreusDHJ02 | Pyrginae         | 05-SRNP-30876       | MHAHF549-06           | GU150681                 |
| 643               | Phanus vitreusDHJ02 | Pyrginae         | 07-SRNP-3510        | MHMXP182-08           | JF762592                 |
| 644               | Phanus vitreusDHJ02 | Pyrginae         | 07-SRNP-4681        | MHMXR638-08           | JF762591                 |
| 645               | Phanus vitreusDHJ02 | Pyrginae         | 07-SRNP-4607        | MHMXR639-08           | JF762590                 |
| 646               | Phanus vitreusDHJ02 | Pyrginae         | 07-SRNP-66113       | MHMXR644-08           | JF762585                 |
| 647               | Phanus vitreusDHJ02 | Pyrginae         | 07-SRNP-4605        | MHMXR641-08           | JF762588                 |
| 648               | Phanus vitreusDHJ02 | Pyrginae         | 07-SRNP-4110        | MHMXR640-08           | JF762589                 |
| 649               | Phanus vitreusDHJ02 | Pyrginae         | 06-SRNP-30361       | MHAHG138-06           | GU151550                 |
| 650               | Phanus vitreusDHJ02 | Pyrginae         | 05-SRNP-4944        | MHAHF548-06           | GU150680                 |
| 651               | Phanus vitreusDHJ02 | Pyrginae         | 08-SRNP-13          | MHMXT059-08           | JF762581                 |
| 652               | Phanus vitreusDHJ02 | Pyrginae         | 07-SRNP-42826       | MHMXR643-08           | JF762586                 |
| 653               | Phanus vitreusDHJ02 | Pyrginae         | 07-SRNP-4604        | MHMXR642-08           | JF762587                 |
| 654               | Phanus vitreusDHJ02 | Pyrginae         | 08-SRNP-40045       | MHMXT056-08           | JF762584                 |
| 655               | Phanus vitreusDHJ02 | Pyrginae         | 07-SRNP-24196       | MHMXT057-08           | JF762583                 |
| 656               | Phanus vitreusDHJ02 | Pyrginae         | 07-SRNP-24814       | MHMXT058-08           | JF762582                 |
| 657               | Phanus vitreusDHJ02 | Pyrginae         | 07-SRNP-4517        | MHMXT060-08           | JF762580                 |
| 658               | Phanus vitreusDHJ02 | Pyrginae         | 08-SRNP-41100       | MHMXW346-09           | JF754061                 |
| 659               | Phanus vitreusDHJ02 | Pyrginae         | 08-SRNP-40547       | MHMXW348-09           | JF754062                 |
| 660               | Phanus vitreusDHJ03 | Pyrginae         | 98-SRNP-4474        | MHAHJ171-07           | JF753050                 |
| 661               | Phanus vitreusDHJ01 | Pyrginae         | 03-SRNP-3212        | MHAHJ186-07           | JF753024                 |
| 662               | Phanus vitreusDHJ01 | Pyrginae         | 98-SRNP-4291        | MHAHJ194-07           | JF753032                 |
| 663               | Phanus vitreusDHJ01 | Pyrginae         | 98-SRNP-4284        | MHAHJ211-07           | JF753049                 |
| 664               | Phanus vitreusDHJ01 | Pyrginae         | 98-SRNP-4554        | MHAHJ202-07           | JF753040                 |
| 665               | Phanus vitreusDHJ01 | Pyrginae         | 00-SRNP-2518        | MHAHJ187-07           | JF753025                 |
| 666               | Phanus vitreusDHJ01 | Pyrginae         | 08-SRNP-5259        | MHMXX708-09           | JF778384                 |
| 667               | Phanus vitreusDHJ01 | Pyrginae         | 97-SRNP-647         | CSCR188-04            | DQ292967                 |
| 668               | Phanus vitreusDHJ01 | Pyrginae         | 98-SRNP-4552        | MHAHJ170-07           | JF753009                 |
| 669               | Phanus vitreusDHJ01 | Pyrginae         | 98-SRNP-4289        | MHAHJ166-07           | JF753005                 |
| 670               | Phanus vitreusDHJ01 | Pyrginae         | 98-SRNP-4556        | MHAHJ192-07           | JF753030                 |
| 671               | Phanus vitreusDHJ01 | Pyrginae         | 98-SRNP-4466        | MHAHJ189-07           | JF753027                 |

| Tree Order | Species              | Subfamily | ACG Sampleid    | BOLD Processid | Genbank Accession |
|------------|----------------------|-----------|-----------------|----------------|-------------------|
| 672        | Phanus vitreusDHJ01  | Pyrginae  | 97-SRNP-554     | MHAHJ179-07    | JF753017          |
| 673        | Phanus vitreusDHJ01  | Pyrginae  | 98-SRNP-4507    | MHAHJ208-07    | JF753046          |
| 674        | Phanus vitreusDHJ01  | Pyrginae  | 08-SRNP-893     | MHMXW343-09    | JF754053          |
| 675        | Phanus vitreusDHJ01  | Pyrginae  | 08-SRNP-716     | MHMXW355-09    | JF754059          |
| 676        | Phanus vitreusDHJ01  | Pyrginae  | 09-SRNP-55618   | MHMYE1479-09   | GU653523          |
| 677        | Phanus vitreusDHJ01  | Pyrginae  | 97-SRNP-648     | MHAHJ210-07    | JF753048          |
| 678        | Phanus vitreusDHJ01  | Pyrginae  | 02-SRNP-1762    | CSCR189-04     | DQ292968          |
| 679        | Phanus vitreusDHJ01  | Pyrginae  | 00-SRNP-2561    | MHAHJ207-07    | JF753045          |
| 680        | Phanus vitreusDHJ01  | Pyrginae  | 97-SRNP-641     | MHAHJ191-07    | JF753029          |
| 681        | Phanus vitreusDHJ01  | Pyrginae  | 98-SRNP-4287    | MHAHJ176-07    | JF753014          |
| 682        | Phanus vitreusDHJ01  | Pyrginae  | 98-SRNP-4510    | MHAHJ196-07    | JF753034          |
| 683        | Phanus vitreusDHJ01  | Pyrginae  | 00-SRNP-2520    | MHAHJ200-07    | JF753038          |
| 684        | Phanus vitreusDHJ01  | Pyrginae  | 98-SRNP-4286    | MHAHJ201-07    | JF753039          |
| 685        | Phanus vitreusDHJ01  | Pyrginae  | 98-SRNP-4518    | MHAHJ198-07    | JF753036          |
| 686        | Phanus vitreusDHJ01  | Pyrginae  | 00-SRNP-2560    | MHAHJ188-07    | JF753026          |
| 687        | Phanus vitreusDHJ01  | Pyrginae  | 03-SRNP-3081    | MHAHJ185-07    | JF753023          |
| 688        | Phanus vitreusDHJ01  | Pyrginae  | 01-SRNP-9201    | MHAHJ178-07    | JF753016          |
| 689        | Phanus vitreusDHJ01  | Pyrginae  | 00-SRNP-2048    | MHAHJ177-07    | JF753015          |
| 690        | Phanus vitreusDHJ01  | Pyrginae  | 00-SRNP-2046    | MHAHJ175-07    | JF753013          |
| 691        | Phanus vitreusDHJ01  | Pyrginae  | 00-SRNP-2556    | MHAHJ174-07    | JF753012          |
| 692        | Phanus vitreusDHJ01  | Pyrginae  | 97-SRNP-640     | MHAHJ173-07    | JF753011          |
| 693        | Phanus vitreusDHJ01  | Pyrginae  | 00-SRNP-2517    | MHAHJ168-07    | JF753007          |
| 694        | Phanus vitreusDHJ01  | Pyrginae  | 98-SRNP-4553    | MHAHJ167-07    | JF753006          |
| 695        | Phanus vitreusDHJ01  | Pyrginae  | 06-SRNP-45146   | MHAHG719-06    | GU151549          |
| 696        | Phanus vitreusDHJ01  | Pyrginae  | 98-SRNP-4288    | MHAHJ195-07    | JF753033          |
| 697        | Phanus vitreusDHJ01  | Pyrginae  | 98-SRNP-4467    | MHAHJ184-07    | JF753022          |
| 698        | Phanus vitreusDHJ01  | Pyrginae  | 98-SRNP-4282    | MHAHJ181-07    | JF753019          |
| 699        | Phanus vitreusDHJ01  | Pyrginae  | 97-SRNP-559     | MHAHJ199-07    | JF753037          |
| 700        | Phanus vitreusDHJ01  | Pyrginae  | 97-SRNP-562     | MHAHJ204-07    | JF753042          |
| 701        | Phanus vitreusDHJ01  | Pyrginae  | 97-SRNP-643     | MHAHJ203-07    | JF753041          |
| 702        | Phanus vitreusDHJ01  | Pyrginae  | 00-SRNP-2562    | MHAHJ197-07    | JF753035          |
| 703        | Phanus vitreusDHJ01  | Pyrginae  | 97-SRNP-526     | MHAHJ193-07    | JF753031          |
| 704        | Phanus vitreusDHJ01  | Pyrginae  | 97-SRNP-548     | MHAHJ190-07    | JF753028          |
| 705        | Phanus vitreusDHJ01  | Pyrginae  | 98-SRNP-4512.01 | MHAHJ183-07    | JF753021          |
| 706        | Phanus vitreusDHJ01  | Pyrginae  | 97-SRNP-642     | MHAHJ182-07    | JF753020          |
| 707        | Phanus vitreusDHJ01  | Pyrginae  | 98-SRNP-4473    | MHAHJ169-07    | JF753008          |
| 708        | Phanus vitreusDHJ01  | Pyrginae  | 97-SRNP-645     | MHAHJ180-07    | JF753018          |
| 709        | Phanus vitreusDHJ01  | Pyrginae  | 97-SRNP-646     | MHAHJ206-07    | JF753044          |
| 710        | Phanus vitreusDHJ01  | Pyrginae  | 97-SRNP-555     | MHAHJ209-07    | JF753047          |
| 711        | Phanus vitreusDHJ01  | Pyrginae  | 00-SRNP-2550    | MHAHJ205-07    | JF753043          |
| 712        | Phanus vitreusDHJ01  | Pyrginae  | 08-SRNP-713     | MHMXW342-09    | JF754052          |
| 713        | Phanus vitreusDHJ01  | Pyrginae  | 08-SRNP-938     | MHMXW344-09    | JF754054          |
| 714        | Phanus vitreusDHJ01  | Pyrginae  | 08-SRNP-717     | MHMXW349-09    | JF754055          |
| 715        | Phanus vitreusDHJ01  | Pyrginae  | 08-SRNP-939     | MHMXW350-09    | JF754056          |
| 716        | Phanus vitreusDHJ01  | Pyrginae  | 08-SRNP-824     | MHMXW352-09    | JF754057          |
| 717        | Phanus vitreusDHJ01  | Pyrginae  | 08-SRNP-715     | MHMXW354-09    | JF754058          |
| 718        | Phanus vitreusDHJ01  | Pyrginae  | 08-SRNP-825     | MHMXW356-09    | JF754060          |
| 719        | Phanus vitreusDHJ01  | Pyrginae  | 08-SRNP-5260    | MHMYE1033-09   | GU666497          |
| 720        | Phanus vitreusDHJ01  | Pyrginae  | 09-SRNP-1728    | MHMYE1480-09   | GU653524          |
| 721        | Phanus vitreusDHJ01  | Pyrginae  | 00-SRNP-2047    | MHAHJ172-07    | JF753010          |
| 722        | Phanus vitreusDHJ01  | Pyrginae  | 09-SRNP-944     | MHMYE1481-09   | GU653521          |
| 723        | Hyalothyryrus neleus | Pyrginae  | 99-SRNP-2782    | CSCR115-04     | DQ292566          |
| 724        | Hyalothyryrus neleus | Pyrginae  | 03-SRNP-15448   | MHAHJ165-07    | JF752884          |
| 725        | Hyalothyryrus neleus | Pyrginae  | 03-SRNP-10401   | MHAHJ164-07    | JF752883          |
| 726        | Hyalothyryrus neleus | Pyrginae  | 02-SRNP-5338    | MHAHJ163-07    | JF752882          |
| 727        | Hyalothyryrus neleus | Pyrginae  | 02-SRNP-15446   | MHAHJ162-07    | JF752881          |

| <b>Tree Order</b> | <b>Species</b>    | <b>Subfamily</b> | <b>ACG Sampleid</b> | <b>BOLD Processid</b> | <b>Genbank Accession</b> |
|-------------------|-------------------|------------------|---------------------|-----------------------|--------------------------|
| 728               | Hyalothyru neleus | Pyrginae         | 02-SRNP-4193        | MHAHJ161-07           | JF752880                 |
| 729               | Hyalothyru neleus | Pyrginae         | 01-SRNP-9634        | MHAHJ160-07           | JF752879                 |
| 730               | Hyalothyru neleus | Pyrginae         | 00-SRNP-2796        | MHAHJ159-07           | JF752878                 |
| 731               | Hyalothyru neleus | Pyrginae         | 01-SRNP-24019       | MHAHJ158-07           | JF752877                 |
| 732               | Hyalothyru neleus | Pyrginae         | 01-SRNP-11940       | MHAHJ157-07           | JF752876                 |
| 733               | Hyalothyru neleus | Pyrginae         | 01-SRNP-9762        | MHAHJ156-07           | JF752875                 |
| 734               | Hyalothyru neleus | Pyrginae         | 01-SRNP-9010        | MHAHJ155-07           | JF752874                 |
| 735               | Hyalothyru neleus | Pyrginae         | 04-SRNP-14956       | MHAHC816-05           | DQ292568                 |
| 736               | Hyalothyru neleus | Pyrginae         | 04-SRNP-23854       | MHAHC815-05           | DQ292567                 |
| 737               | Hyalothyru neleus | Pyrginae         | 02-SRNP-5623        | CSCR468-04            | DQ292565                 |
| 738               | Hyalothyru neleus | Pyrginae         | 02-SRNP-2903        | CSCR463-04            | DQ292564                 |
| 739               | Hyalothyru neleus | Pyrginae         | 07-SRNP-1289        | MHMXX040-07           | JF762294                 |
| 740               | Hyalothyru neleus | Pyrginae         | 05-SRNP-23937       | MHAHL097-07           | JF762290                 |
| 741               | Hyalothyru neleus | Pyrginae         | 05-SRNP-24060       | MHAHL099-07           | JF762291                 |
| 742               | Hyalothyru neleus | Pyrginae         | 05-SRNP-33739       | MHAHL100-07           | JF762292                 |
| 743               | Hyalothyru neleus | Pyrginae         | 07-SRNP-1874        | MHAHL204-07           | JF762293                 |
| 744               | Hyalothyru neleus | Pyrginae         | 08-SRNP-20639       | MHMXX904-09           | JF778031                 |
| 745               | Entheus Burns01   | Pyrginae         | 05-SRNP-31825       | MHAHF398-06           | GU150413                 |
| 746               | Entheus Burns01   | Pyrginae         | 05-SRNP-31804       | MHAHF406-06           | GU150412                 |
| 747               | Entheus Burns01   | Pyrginae         | 03-SRNP-3912        | CSRII639-05           | DQ292417                 |
| 748               | Entheus Burns01   | Pyrginae         | 05-SRNP-31679       | MHAHF413-06           | GU150420                 |
| 749               | Entheus Burns01   | Pyrginae         | 05-SRNP-31813       | MHAHF410-06           | GU150424                 |
| 750               | Entheus Burns01   | Pyrginae         | 05-SRNP-31809       | MHAHF403-06           | GU150417                 |
| 751               | Entheus Burns01   | Pyrginae         | 05-SRNP-31684       | MHAHF401-06           | GU150416                 |
| 752               | Entheus Burns01   | Pyrginae         | 05-SRNP-31469       | MHAHF418-06           | GU150419                 |
| 753               | Entheus Burns01   | Pyrginae         | 05-SRNP-31803       | MHAHF412-06           | GU150425                 |
| 754               | Entheus Burns01   | Pyrginae         | 05-SRNP-31805       | MHAHF409-06           | GU150423                 |
| 755               | Entheus Burns01   | Pyrginae         | 05-SRNP-31467       | MHAHF408-06           | GU150409                 |
| 756               | Entheus Burns01   | Pyrginae         | 05-SRNP-31811       | MHAHF407-06           | GU150418                 |
| 757               | Entheus Burns01   | Pyrginae         | 05-SRNP-31807       | MHAHF405-06           | GU150422                 |
| 758               | Entheus Burns01   | Pyrginae         | 05-SRNP-31470       | MHAHF404-06           | GU150421                 |
| 759               | Entheus Burns01   | Pyrginae         | 05-SRNP-31681       | MHAHF400-06           | GU150410                 |
| 760               | Entheus Burns01   | Pyrginae         | 05-SRNP-31680       | MHAHF399-06           | GU150411                 |
| 761               | Entheus Burns01   | Pyrginae         | 05-SRNP-31685       | MHAHF397-06           | GU150414                 |
| 762               | Entheus Burns01   | Pyrginae         | 04-SRNP-35514       | MHAHC807-05           | DQ292438                 |
| 763               | Entheus Burns01   | Pyrginae         | 04-SRNP-56807       | MHAHC385-05           | DQ292437                 |
| 764               | Entheus Burns01   | Pyrginae         | 05-SRNP-30012       | MHAHC383-05           | DQ292436                 |
| 765               | Entheus Burns01   | Pyrginae         | 05-SRNP-30006       | MHAHC380-05           | DQ292435                 |
| 766               | Entheus Burns01   | Pyrginae         | 05-SRNP-30261       | MHAHC378-05           | DQ292434                 |
| 767               | Entheus Burns01   | Pyrginae         | 04-SRNP-32629       | MHAHC040-05           | DQ292428                 |
| 768               | Entheus Burns01   | Pyrginae         | 04-SRNP-32406       | MHAHC032-05           | DQ292426                 |
| 769               | Entheus Burns01   | Pyrginae         | 04-SRNP-32627       | MHAHC017-05           | DQ292422                 |
| 770               | Entheus Burns01   | Pyrginae         | 04-SRNP-22955       | MHAHC001-05           | DQ292420                 |
| 771               | Entheus Burns01   | Pyrginae         | 04-SRNP-32897       | MHAHC089-05           | DQ292433                 |
| 772               | Entheus Burns01   | Pyrginae         | 04-SRNP-32435       | MHAHC081-05           | DQ292432                 |
| 773               | Entheus Burns01   | Pyrginae         | 04-SRNP-32100       | MHAHC073-05           | DQ292431                 |
| 774               | Entheus Burns01   | Pyrginae         | 04-SRNP-32971       | MHAHC057-05           | DQ292430                 |
| 775               | Entheus Burns01   | Pyrginae         | 04-SRNP-32102       | MHAHC049-05           | DQ292429                 |
| 776               | Entheus Burns01   | Pyrginae         | 04-SRNP-32620       | MHAHC033-05           | DQ292427                 |
| 777               | Entheus Burns01   | Pyrginae         | 04-SRNP-32626       | MHAHC026-05           | DQ292425                 |
| 778               | Entheus Burns01   | Pyrginae         | 04-SRNP-32624       | MHAHC018-05           | DQ292423                 |
| 779               | Entheus Burns01   | Pyrginae         | 04-SRNP-32619       | MHAHC010-05           | DQ292421                 |
| 780               | Entheus Burns01   | Pyrginae         | 03-SRNP-4063        | CSRII638-05           | DQ292416                 |
| 781               | Entheus Burns01   | Pyrginae         | 03-SRNP-4085        | CSRII637-05           | DQ292415                 |
| 782               | Entheus Burns01   | Pyrginae         | 03-SRNP-4083        | CSRII636-05           | DQ292414                 |
| 783               | Entheus Burns01   | Pyrginae         | 03-SRNP-4089        | CSRII635-05           | DQ292413                 |

| <b>Tree Order</b> | <b>Species</b>  | <b>Subfamily</b> | <b>ACG Sampleid</b> | <b>BOLD Processid</b> | <b>Genbank Accession</b> |
|-------------------|-----------------|------------------|---------------------|-----------------------|--------------------------|
| 784               | Entheus Burns01 | Pyrginae         | 03-SRNP-4031        | CSRII634-05           | DQ292412                 |
| 785               | Entheus Burns01 | Pyrginae         | 03-SRNP-3913        | CSRII633-05           | DQ292411                 |
| 786               | Entheus Burns01 | Pyrginae         | 03-SRNP-4079        | CSRII632-05           | DQ292410                 |
| 787               | Entheus Burns01 | Pyrginae         | 03-SRNP-4150        | CSRII631-05           | DQ292409                 |
| 788               | Entheus Burns01 | Pyrginae         | 03-SRNP-3910        | CSRII630-05           | DQ292408                 |
| 789               | Entheus Burns01 | Pyrginae         | 03-SRNP-4088        | CSRII629-05           | DQ292407                 |
| 790               | Entheus Burns01 | Pyrginae         | 03-SRNP-3911        | CSRII628-05           | DQ292406                 |
| 791               | Entheus Burns01 | Pyrginae         | 03-SRNP-4062        | CSRII627-05           | DQ292405                 |
| 792               | Entheus Burns01 | Pyrginae         | 05-SRNP-31988       | MHAHF402-06           | GU150415                 |
| 793               | Entheus Burns01 | Pyrginae         | 04-SRNP-32128       | MHAHC025-05           | DQ292424                 |
| 794               | Entheus Burns01 | Pyrginae         | 02-SRNP-9578        | CSCR105-04            | DQ292404                 |
| 795               | Entheus Burns01 | Pyrginae         | 02-SRNP-8498        | CSRII677-05           | DQ292419                 |
| 796               | Entheus Burns01 | Pyrginae         | 02-SRNP-8540        | CSRII640-05           | DQ292418                 |
| 797               | Entheus Burns01 | Pyrginae         | 02-SRNP-9309        | CSCR473-04            | DQ292403                 |
| 798               | Entheus Burns01 | Pyrginae         | 08-SRNP-35619       | MHMXX1036-09          | JF777899                 |
| 799               | Entheus Burns01 | Pyrginae         | 08-SRNP-35620       | MHMXX1037-09          | JF777900                 |
| 800               | Entheus Burns03 | Pyrginae         | 07-SRNP-65862       | MHMXR834-08           | JF762188                 |
| 801               | Entheus Burns03 | Pyrginae         | 03-SRNP-6132        | CSCR363-04            | DQ292390                 |
| 802               | Entheus Burns03 | Pyrginae         | 06-SRNP-44097       | MHAHK079-07           | JF760674                 |
| 803               | Entheus Burns03 | Pyrginae         | 07-SRNP-65775       | MHMXR835-08           | JF762187                 |
| 804               | Entheus Burns03 | Pyrginae         | 03-SRNP-21789       | CSRII129-04           | DQ292393                 |
| 805               | Entheus Burns03 | Pyrginae         | 02-SRNP-19102       | CSCR103-04            | DQ292389                 |
| 806               | Entheus Burns03 | Pyrginae         | 05-SRNP-195         | MHAHF414-06           | GU150404                 |
| 807               | Entheus Burns03 | Pyrginae         | 04-SRNP-56418       | MHAHF415-06           | GU150407                 |
| 808               | Entheus Burns03 | Pyrginae         | 05-SRNP-30875       | MHAHF420-06           | GU150405                 |
| 809               | Entheus Burns03 | Pyrginae         | 05-SRNP-54          | MHAHF419-06           | GU150403                 |
| 810               | Entheus Burns03 | Pyrginae         | 05-SRNP-1251        | MHAHF416-06           | GU150406                 |
| 811               | Entheus Burns03 | Pyrginae         | 07-SRNP-65331       | MHMXR831-08           | JF762191                 |
| 812               | Entheus Burns03 | Pyrginae         | 07-SRNP-65174       | MHMXP191-08           | JF762192                 |
| 813               | Entheus Burns03 | Pyrginae         | 07-SRNP-2018        | MHAHL221-07           | JF762185                 |
| 814               | Entheus Burns03 | Pyrginae         | 07-SRNP-2055        | MHAHL220-07           | JF762184                 |
| 815               | Entheus Burns03 | Pyrginae         | 07-SRNP-65148       | MHAHL219-07           | JF762183                 |
| 816               | Entheus Burns03 | Pyrginae         | 07-SRNP-1374        | MHAHL218-07           | JF762182                 |
| 817               | Entheus Burns03 | Pyrginae         | 07-SRNP-65011       | MHAHL217-07           | JF762181                 |
| 818               | Entheus Burns03 | Pyrginae         | 06-SRNP-44104       | MHAHK078-07           | JF760673                 |
| 819               | Entheus Burns03 | Pyrginae         | 06-SRNP-31151       | MHAHH509-06           | GU155401                 |
| 820               | Entheus Burns03 | Pyrginae         | 05-SRNP-1370        | MHAHF417-06           | GU150408                 |
| 821               | Entheus Burns03 | Pyrginae         | 04-SRNP-55949       | MHAHC384-05           | DQ292402                 |
| 822               | Entheus Burns03 | Pyrginae         | 05-SRNP-196         | MHAHC382-05           | DQ292401                 |
| 823               | Entheus Burns03 | Pyrginae         | 04-SRNP-55940       | MHAHC379-05           | DQ292400                 |
| 824               | Entheus Burns03 | Pyrginae         | 04-SRNP-61137       | MHAHC376-05           | DQ292398                 |
| 825               | Entheus Burns03 | Pyrginae         | 04-SRNP-61243       | MHAHC375-05           | DQ292397                 |
| 826               | Entheus Burns03 | Pyrginae         | 04-SRNP-2113        | MHAHC009-05           | DQ292394                 |
| 827               | Entheus Burns03 | Pyrginae         | 04-SRNP-1610        | MHAHC065-05           | DQ292396                 |
| 828               | Entheus Burns03 | Pyrginae         | 04-SRNP-1609        | MHAHC041-05           | DQ292395                 |
| 829               | Entheus Burns03 | Pyrginae         | 04-SRNP-60791       | MHAHC377-05           | DQ292399                 |
| 830               | Entheus Burns03 | Pyrginae         | 06-SRNP-31150       | MHAHH510-06           | GU155400                 |
| 831               | Entheus Burns03 | Pyrginae         | 03-SRNP-21250       | CSRII128-04           | DQ292392                 |
| 832               | Entheus Burns03 | Pyrginae         | 03-SRNP-6130        | CSCR509-04            | DQ292391                 |
| 833               | Entheus Burns03 | Pyrginae         | 07-SRNP-65230       | MHMXR832-08           | JF762190                 |
| 834               | Entheus Burns03 | Pyrginae         | 07-SRNP-65191       | MHMXR833-08           | JF762189                 |
| 835               | Entheus Burns03 | Pyrginae         | 08-SRNP-65008       | MHMXT149-08           | JF762186                 |
| 836               | Entheus Burns03 | Pyrginae         | 08-SRNP-65118       | MHMXX1034-09          | JF777909                 |
| 837               | Entheus Burns03 | Pyrginae         | 08-SRNP-65323       | MHMXX1035-09          | JF777910                 |
| 838               | Entheus Burns03 | Pyrginae         | 08-SRNP-66040       | MHMXY1087-09          | GU666452                 |
| 839               | Entheus Burns03 | Pyrginae         | 09-SRNP-56806       | MHMYE1478-09          | GU653526                 |

| <b>Tree Order</b> | <b>Species</b>     | <b>Subfamily</b> | <b>ACG Sampleid</b> | <b>BOLD Processid</b> | <b>Genbank Accession</b> |
|-------------------|--------------------|------------------|---------------------|-----------------------|--------------------------|
| 840               | Entheus Burns02    | Pyrginae         | 08-SRNP-72638       | MHMYC459-09           | GU649874                 |
| 841               | Entheus Burns02    | Pyrginae         | 00-SRNP-2001        | CSCR102-04            | DQ292388                 |
| 842               | Entheus Burns02    | Pyrginae         | 99-SRNP-15392       | CSCR101-04            | DQ292387                 |
| 843               | Entheus Burns02    | Pyrginae         | 05-SRNP-31934       | MHAHF411-06           | GU150401                 |
| 844               | Entheus Burns02    | Pyrginae         | 08-SRNP-31023       | MHMXX1038-09          | JF777901                 |
| 845               | Entheus Burns02    | Pyrginae         | 08-SRNP-71195       | MHMXX577-09           | JF777905                 |
| 846               | Entheus Burns02    | Pyrginae         | 08-SRNP-33091       | MHMYC460-09           | GU649875                 |
| 847               | Entheus Burns02    | Pyrginae         | 08-SRNP-71849       | MHMXY1088-09          | GU666453                 |
| 848               | Entheus Burns02    | Pyrginae         | 08-SRNP-72316       | MHMXY1086-09          | GU666451                 |
| 849               | Entheus Burns02    | Pyrginae         | 08-SRNP-71739       | MHMXX718-09           | JF777908                 |
| 850               | Entheus Burns02    | Pyrginae         | 08-SRNP-70953       | MHMXX579-09           | JF777907                 |
| 851               | Entheus Burns02    | Pyrginae         | 08-SRNP-70952       | MHMXX578-09           | JF777906                 |
| 852               | Entheus Burns02    | Pyrginae         | 08-SRNP-71814       | MHMXX576-09           | JF777904                 |
| 853               | Entheus Burns02    | Pyrginae         | 08-SRNP-71740       | MHMXX575-09           | JF777903                 |
| 854               | Entheus Burns02    | Pyrginae         | 08-SRNP-71134       | MHMXX574-09           | JF777902                 |
| 855               | Entheus Burns02    | Pyrginae         | 06-SRNP-20135       | MHAHL098-07           | JF762180                 |
| 856               | Entheus Burns02    | Pyrginae         | 06-SRNP-34837       | MHAHK714-07           | JF760672                 |
| 857               | Entheus Burns02    | Pyrginae         | 05-SRNP-21189       | MHAHG736-06           | GU151402                 |
| 858               | Entheus Burns02    | Pyrginae         | 05-SRNP-32113       | MHAHF716-06           | GU150402                 |
| 859               | Entheus Burns02    | Pyrginae         | 05-SRNP-34263       | MHAHG148-06           | GU151401                 |
| 860               | Entheus Burns02    | Pyrginae         | 06-SRNP-32638       | MHAHI570-06           | GU155960                 |
| 861               | Entheus Burns02    | Pyrginae         | 05-SRNP-34780       | MHAHG147-06           | GU151400                 |
| 862               | Entheus Burns02    | Pyrginae         | 02-SRNP-14694       | CSCR472-04            | DQ292386                 |
| 863               | Entheus Burns02    | Pyrginae         | 09-SRNP-30020       | MHMYC458-09           | GU649873                 |
| 864               | Entheus Burns02    | Pyrginae         | 09-SRNP-70294       | MHMYE886-09           | GU653717                 |
| 865               | Entheus Burns02    | Pyrginae         | 09-SRNP-71529       | MHMYE1477-09          | GU653525                 |
| 866               | Entheus Burns02    | Pyrginae         | 09-SRNP-70531       | MHMYG2420-10          | HM885842                 |
| 867               | Antigonus nearchus | Pyrginae         | 00-SRNP-12980       | CSCR014-04            | DQ291816                 |
| 868               | Antigonus nearchus | Pyrginae         | 00-SRNP-10364       | MHAHI215-06           | GU155757                 |
| 869               | Antigonus nearchus | Pyrginae         | 06-SRNP-32799       | MHAHI181-06           | GU155758                 |
| 870               | Antigonus nearchus | Pyrginae         | 01-SRNP-5567        | CSCR015-04            | DQ291817                 |
| 871               | Antigonus nearchus | Pyrginae         | 96-SRNP-11137       | MHAHI216-06           | GU155756                 |
| 872               | Antigonus nearchus | Pyrginae         | 06-SRNP-67851       | MHMXH855-07           | JF760245                 |
| 873               | Timochreon satyrus | Pyrginae         | 98-SRNP-4800        | MHAHI212-06           | GU156361                 |
| 874               | Timochreon satyrus | Pyrginae         | 07-SRNP-55646       | MHMXX012-07           | JF763253                 |
| 875               | Timochreon satyrus | Pyrginae         | 07-SRNP-58884       | MHMXR023-08           | JF763252                 |
| 876               | Timochreon satyrus | Pyrginae         | 07-SRNP-55299       | MHMXX009-07           | JF763256                 |
| 877               | Timochreon satyrus | Pyrginae         | 06-SRNP-59556       | MHMXH893-07           | JF761223                 |
| 878               | Timochreon satyrus | Pyrginae         | 06-SRNP-57946       | MHAHJ668-07           | JF753193                 |
| 879               | Timochreon satyrus | Pyrginae         | 02-SRNP-5343        | MHAHI208-06           | GU156365                 |
| 880               | Timochreon satyrus | Pyrginae         | 00-SRNP-3407        | MHAHI207-06           | GU156363                 |
| 881               | Timochreon satyrus | Pyrginae         | 01-SRNP-11952       | MHAHI206-06           | GU156366                 |
| 882               | Timochreon satyrus | Pyrginae         | 05-SRNP-24369       | MHAHF610-06           | GU150937                 |
| 883               | Timochreon satyrus | Pyrginae         | 04-SRNP-16184       | MHAHF123-06           | GU150935                 |
| 884               | Timochreon satyrus | Pyrginae         | 04-SRNP-26992       | MHAHF122-06           | GU150936                 |
| 885               | Timochreon satyrus | Pyrginae         | 04-SRNP-21555       | MHAHD878-05           | GU161896                 |
| 886               | Timochreon satyrus | Pyrginae         | 97-SRNP-4864        | MHAHI210-06           | GU156367                 |
| 887               | Timochreon satyrus | Pyrginae         | 02-SRNP-4030        | CSCR266-04            | DQ293605                 |
| 888               | Timochreon satyrus | Pyrginae         | 02-SRNP-15405       | CSCR267-04            | DQ293606                 |
| 889               | Timochreon satyrus | Pyrginae         | 97-SRNP-4132        | MHAHI211-06           | GU156362                 |
| 890               | Timochreon satyrus | Pyrginae         | 01-SRNP-11309       | MHAHI209-06           | GU156364                 |
| 891               | Timochreon satyrus | Pyrginae         | 02-SRNP-14811       | MHAHI213-06           | GU156368                 |
| 892               | Timochreon satyrus | Pyrginae         | 02-SRNP-33938       | MHAHI214-06           | GU156360                 |
| 893               | Timochreon satyrus | Pyrginae         | 07-SRNP-55645       | MHMXX010-07           | JF763255                 |
| 894               | Timochreon satyrus | Pyrginae         | 07-SRNP-55655       | MHMXX011-07           | JF763254                 |
| 895               | Timochreon satyrus | Pyrginae         | 09-SRNP-73053       | MHMYG2421-10          | HM885844                 |



| Tree Order | Species                 | Subfamily | ACG Sampleid  | BOLD Processid | Genbank Accession |
|------------|-------------------------|-----------|---------------|----------------|-------------------|
| 896        | Heliopetes lavianaDHJ02 | Pyrginae  | 06-SRNP-19429 | MHAHI522-06    | GU155983          |
| 897        | Heliopetes lavianaDHJ02 | Pyrginae  | 06-SRNP-19419 | MHAHK726-07    | JF760794          |
| 898        | Heliopetes lavianaDHJ02 | Pyrginae  | 06-SRNP-19431 | MHAHK725-07    | JF760793          |
| 899        | Heliopetes lavianaDHJ02 | Pyrginae  | 06-SRNP-18783 | MHAHK724-07    | JF760792          |
| 900        | Heliopetes lavianaDHJ02 | Pyrginae  | 06-SRNP-19423 | MHAHK723-07    | JF760791          |
| 901        | Heliopetes lavianaDHJ02 | Pyrginae  | 06-SRNP-19396 | MHAHK721-07    | JF760789          |
| 902        | Heliopetes lavianaDHJ02 | Pyrginae  | 06-SRNP-19523 | MHAHK159-07    | JF760787          |
| 903        | Heliopetes lavianaDHJ02 | Pyrginae  | 06-SRNP-19420 | MHAHI528-06    | GU155986          |
| 904        | Heliopetes lavianaDHJ02 | Pyrginae  | 06-SRNP-19397 | MHAHI526-06    | GU155982          |
| 905        | Heliopetes lavianaDHJ02 | Pyrginae  | 06-SRNP-19416 | MHAHK720-07    | JF760788          |
| 906        | Heliopetes lavianaDHJ02 | Pyrginae  | 06-SRNP-18781 | MHAHK727-07    | JF760795          |
| 907        | Heliopetes lavianaDHJ02 | Pyrginae  | 04-SRNP-45705 | MHAHD679-05    | GU161540          |
| 908        | Heliopetes lavianaDHJ02 | Pyrginae  | 04-SRNP-45704 | MHAHD680-05    | GU161541          |
| 909        | Heliopetes lavianaDHJ02 | Pyrginae  | 06-SRNP-19448 | MHAHI524-06    | GU155985          |
| 910        | Heliopetes lavianaDHJ02 | Pyrginae  | 06-SRNP-19402 | MHAHI525-06    | GU155984          |
| 911        | Heliopetes lavianaDHJ02 | Pyrginae  | 06-SRNP-19622 | MHAHK158-07    | JF760786          |
| 912        | Heliopetes lavianaDHJ02 | Pyrginae  | 06-SRNP-18780 | MHAHK722-07    | JF760790          |
| 913        | Heliopetes lavianaDHJ02 | Pyrginae  | 06-SRNP-19414 | MHAHK728-07    | JF760796          |
| 914        | Heliopetes lavianaDHJ02 | Pyrginae  | 06-SRNP-19401 | MHAHK729-07    | JF760797          |
| 915        | Heliopetes alana        | Pyrginae  | 04-SRNP-48169 | MHAHD676-05    | GU161538          |
| 916        | Heliopetes alana        | Pyrginae  | 05-SRNP-55030 | MHAHD678-05    | GU161537          |
| 917        | Heliopetes alana        | Pyrginae  | 05-SRNP-5611  | MHAHE566-06    | GU149686          |
| 918        | Heliopetes alana        | Pyrginae  | 06-SRNP-6703  | MHAHJ761-07    | JF752847          |
| 919        | Heliopetes arsalte      | Pyrginae  | 09-SRNP-2102  | MHMYE1536-09   | HM391096          |
| 920        | Heliopetes arsalte      | Pyrginae  | 09-SRNP-44424 | MHMYE871-09    | GU653730          |
| 921        | Heliopetes arsalte      | Pyrginae  | 05-SRNP-31020 | MHAHF537-06    | GU150500          |
| 922        | Heliopetes arsalte      | Pyrginae  | 05-SRNP-34906 | MHAHF708-06    | GU150501          |
| 923        | Heliopetes arsalte      | Pyrginae  | 06-SRNP-2053  | MHAHG803-06    | GU151432          |
| 924        | Heliopetes arsalte      | Pyrginae  | 04-SRNP-42488 | MHAHD672-05    | GU161539          |
| 925        | Heliopetes arsalte      | Pyrginae  | 05-SRNP-3992  | MHAHE565-06    | GU149687          |
| 926        | Heliopetes arsalte      | Pyrginae  | 06-SRNP-19606 | MHMXH896-07    | JF760783          |
| 927        | Heliopetes arsalte      | Pyrginae  | 07-SRNP-55805 | MHAHK701-07    | JF760784          |
| 928        | Heliopetes arsalte      | Pyrginae  | 09-SRNP-71844 | MHMYE1535-09   | HM391095          |
| 929        | Heliopetes arsalte      | Pyrginae  | 09-SRNP-2103  | MHMYE1537-09   | HM391097          |
| 930        | Heliopetes arsalte      | Pyrginae  | 09-SRNP-72759 | MHMYE1538-09   | HM391098          |
| 931        | Pyrgus adepta           | Pyrginae  | 05-SRNP-61486 | MHAHF705-06    | GU150730          |
| 932        | Pyrgus adepta           | Pyrginae  | 05-SRNP-3108  | MHAHF552-06    | GU150729          |
| 933        | Pyrgus adepta           | Pyrginae  | 05-SRNP-4774  | MHAHE569-06    | GU149867          |
| 934        | Pyrgus adepta           | Pyrginae  | 05-SRNP-3111  | MHAHF551-06    | GU150728          |
| 935        | Pyrgus adepta           | Pyrginae  | 05-SRNP-6162  | MHAHF706-06    | GU150731          |
| 936        | Pyrgus adepta           | Pyrginae  | 06-SRNP-3986  | MHAHI168-06    | GU156285          |
| 937        | Pyrgus adepta           | Pyrginae  | 06-SRNP-22079 | MHAHJ710-07    | JF753095          |
| 938        | Pyrgus adepta           | Pyrginae  | 07-SRNP-57963 | MHMXO973-08    | JF762698          |
| 939        | Pyrgus adepta           | Pyrginae  | 08-SRNP-40797 | MHMXX865-09    | JF778418          |
| 940        | Pyrgus adepta           | Pyrginae  | 09-SRNP-35755 | MHMYE1565-09   | HM391125          |
| 941        | Pyrgus oileusDHJ01      | Pyrginae  | 05-SRNP-47404 | MHAHE568-06    | GU149868          |
| 942        | Pyrgus oileusDHJ02      | Pyrginae  | 09-SRNP-72609 | MHMYE1534-09   | HM391094          |
| 943        | Pyrgus oileusDHJ02      | Pyrginae  | 09-SRNP-57316 | MHMYH158-10    | HM887306          |
| 944        | Pyrgus oileusDHJ02      | Pyrginae  | 04-SRNP-4880  | MHAHD683-05    | GU161798          |
| 945        | Pyrgus oileusDHJ02      | Pyrginae  | 97-SRNP-6018  | MHAHK479-07    | JF761073          |
| 946        | Pyrgus oileusDHJ02      | Pyrginae  | 97-SRNP-6017  | MHAHK480-07    | JF761074          |
| 947        | Pyrgus oileusDHJ02      | Pyrginae  | 97-SRNP-6323  | MHAHK482-07    | JF761075          |
| 948        | Pyrgus oileusDHJ02      | Pyrginae  | 07-SRNP-30612 | MHAHK702-07    | JF761076          |
| 949        | Pyrgus oileusDHJ02      | Pyrginae  | 07-SRNP-41537 | MHAHL203-07    | JF762699          |
| 950        | Pyrgus oileusDHJ02      | Pyrginae  | 07-SRNP-33658 | MHMXR001-08    | JF762700          |
| 951        | Pyrgus oileusDHJ02      | Pyrginae  | 09-SRNP-41756 | MHMYH159-10    | HM887307          |

| Tree Order | Species            | Subfamily | ACG Sampleid  | BOLD Processid | Genbank Accession |
|------------|--------------------|-----------|---------------|----------------|-------------------|
| 952        | Pyrgus oileusDHJ03 | Pyrginae  | 05-SRNP-41121 | MHAHF553-06    | GU150733          |
| 953        | Pyrgus oileusDHJ03 | Pyrginae  | 05-SRNP-41120 | MHAHF555-06    | GU150732          |
| 954        | Pyrgus oileusDHJ03 | Pyrginae  | 97-SRNP-468   | MHAHK481-07    | JF761078          |
| 955        | Pyrgus oileusDHJ03 | Pyrginae  | 05-SRNP-5995  | MHAHF707-06    | GU150735          |
| 956        | Pyrgus oileusDHJ03 | Pyrginae  | 93-SRNP-6385  | MHAHK484-07    | JF761079          |
| 957        | Pyrgus oileusDHJ03 | Pyrginae  | 06-SRNP-59892 | MHMXH869-07    | JF761077          |
| 958        | Pyrgus oileusDHJ03 | Pyrginae  | 05-SRNP-42130 | MHAHE567-06    | GU149870          |
| 959        | Pyrgus oileusDHJ03 | Pyrginae  | 05-SRNP-3112  | MHAHE373-05    | GU149869          |
| 960        | Pyrgus oileusDHJ03 | Pyrginae  | 04-SRNP-4881  | MHAHD684-05    | GU161797          |
| 961        | Pyrgus oileusDHJ03 | Pyrginae  | 05-SRNP-56295 | MHAHF554-06    | GU150734          |
| 962        | Pyrgus oileusDHJ03 | Pyrginae  | 07-SRNP-58554 | MHMXX0972-08   | JF762701          |
| 963        | Pyrgus oileusDHJ03 | Pyrginae  | 08-SRNP-71705 | MHMXX866-09    | JF778419          |
| 964        | Pyrgus oileusDHJ03 | Pyrginae  | 09-SRNP-44136 | MHMYE870-09    | GU653733          |
| 965        | Pyrgus oileusDHJ03 | Pyrginae  | 09-SRNP-73409 | MHMYH157-10    | HM887305          |
| 966        | Pyrgus oileusDHJ03 | Pyrginae  | 09-SRNP-73394 | MHMYH160-10    | HM887308          |
| 967        | Zopyrion sandace   | Pyrginae  | 93-SRNP-7566  | MHMYH1661-10   | HQ992672          |
| 968        | Zopyrion sandace   | Pyrginae  | 97-SRNP-9768  | MHMYH1662-10   | HQ992673          |
| 969        | Antigonus erosus   | Pyrginae  | 04-SRNP-14882 | MHAHE205-05    | GU149382          |
| 970        | Antigonus erosus   | Pyrginae  | 04-SRNP-15034 | MHAHE198-05    | GU149378          |
| 971        | Antigonus erosus   | Pyrginae  | 07-SRNP-57033 | MHAHL208-07    | JF761410          |
| 972        | Antigonus erosus   | Pyrginae  | 04-SRNP-14311 | MHAHE201-05    | GU149376          |
| 973        | Antigonus erosus   | Pyrginae  | 04-SRNP-47715 | MHAHE204-05    | GU149388          |
| 974        | Antigonus erosus   | Pyrginae  | 04-SRNP-48661 | MHAHE199-05    | GU149381          |
| 975        | Antigonus erosus   | Pyrginae  | 05-SRNP-34080 | MHAHG146-06    | GU151066          |
| 976        | Antigonus erosus   | Pyrginae  | 05-SRNP-2158  | MHMXN264-07    | JF761416          |
| 977        | Antigonus erosus   | Pyrginae  | 05-SRNP-45294 | MHMXN263-07    | JF761417          |
| 978        | Antigonus erosus   | Pyrginae  | 05-SRNP-2157  | MHMXN262-07    | JF761418          |
| 979        | Antigonus erosus   | Pyrginae  | 05-SRNP-55042 | MHMXN261-07    | JF761419          |
| 980        | Antigonus erosus   | Pyrginae  | 07-SRNP-40136 | MHAHK362-07    | JF760244          |
| 981        | Antigonus erosus   | Pyrginae  | 06-SRNP-6733  | MHAHJ753-07    | JF752376          |
| 982        | Antigonus erosus   | Pyrginae  | 06-SRNP-44597 | MHAHJ602-07    | JF752375          |
| 983        | Antigonus erosus   | Pyrginae  | 04-SRNP-15182 | MHAHE212-05    | GU149380          |
| 984        | Antigonus erosus   | Pyrginae  | 04-SRNP-48127 | MHAHE211-05    | GU149384          |
| 985        | Antigonus erosus   | Pyrginae  | 04-SRNP-47713 | MHAHE210-05    | GU149386          |
| 986        | Antigonus erosus   | Pyrginae  | 04-SRNP-48470 | MHAHE209-05    | GU149387          |
| 987        | Antigonus erosus   | Pyrginae  | 04-SRNP-4027  | MHAHE207-05    | GU149383          |
| 988        | Antigonus erosus   | Pyrginae  | 04-SRNP-15037 | MHAHE206-05    | GU149379          |
| 989        | Antigonus erosus   | Pyrginae  | 04-SRNP-14884 | MHAHE203-05    | GU149375          |
| 990        | Antigonus erosus   | Pyrginae  | 04-SRNP-14704 | MHAHE202-05    | GU149377          |
| 991        | Antigonus erosus   | Pyrginae  | 04-SRNP-48663 | MHAHE200-05    | GU149373          |
| 992        | Antigonus erosus   | Pyrginae  | 04-SRNP-46846 | MHAHE197-05    | GU149374          |
| 993        | Antigonus erosus   | Pyrginae  | 03-SRNP-916   | CSCR303-04     | DQ291814          |
| 994        | Antigonus erosus   | Pyrginae  | 04-SRNP-14889 | MHAHE208-05    | GU149385          |
| 995        | Antigonus erosus   | Pyrginae  | 06-SRNP-5959  | MHAHI178-06    | GU155755          |
| 996        | Antigonus erosus   | Pyrginae  | 03-SRNP-5120  | CSCR304-04     | DQ291815          |
| 997        | Antigonus erosus   | Pyrginae  | 05-SRNP-5668  | MHMXN265-07    | JF761415          |
| 998        | Antigonus erosus   | Pyrginae  | 07-SRNP-2954  | MHAHL209-07    | JF761411          |
| 999        | Antigonus erosus   | Pyrginae  | 07-SRNP-42448 | MHMXP220-08    | JF761414          |
| 1000       | Antigonus erosus   | Pyrginae  | 07-SRNP-3283  | MHMXP221-08    | JF761413          |
| 1001       | Antigonus erosus   | Pyrginae  | 07-SRNP-23787 | MHMXR024-08    | JF761412          |
| 1002       | Antigonus erosus   | Pyrginae  | 08-SRNP-31067 | MHMXX860-09    | JF777591          |
| 1003       | Antigonus erosus   | Pyrginae  | 09-SRNP-43129 | MHMYG2428-10   | HM885851          |
| 1004       | Antigonus erosus   | Pyrginae  | 09-SRNP-67761 | MHMYG2499-10   | HM885927          |
| 1005       | Carrhenes calidius | Pyrginae  | 01-SRNP-11410 | CSCR051-04     | DQ291965          |
| 1006       | Carrhenes calidius | Pyrginae  | 05-SRNP-1277  | MHAHF074-06    | GU150306          |
| 1007       | Carrhenes calidius | Pyrginae  | 08-SRNP-21848 | MHMXX876-09    | JF777722          |

| <b>Tree Order</b> | <b>Species</b>         | <b>Subfamily</b> | <b>ACG Sampleid</b> | <b>BOLD Processid</b> | <b>Genbank Accession</b> |
|-------------------|------------------------|------------------|---------------------|-----------------------|--------------------------|
| 1008              | Carrhenes calidius     | Pyrginae         | 08-SRNP-21846       | MHMXX878-09           | JF777724                 |
| 1009              | Carrhenes calidius     | Pyrginae         | 08-SRNP-6834        | MHMYC508-09           | GU649827                 |
| 1010              | Carrhenes calidius     | Pyrginae         | 06-SRNP-42410       | MHAHI615-06           | GU155854                 |
| 1011              | Carrhenes calidius     | Pyrginae         | 06-SRNP-42411       | MHAHI688-06           | GU155857                 |
| 1012              | Carrhenes calidius     | Pyrginae         | 05-SRNP-41755       | MHAHF324-06           | GU150311                 |
| 1013              | Carrhenes calidius     | Pyrginae         | 06-SRNP-23205       | MHAHJ491-07           | JF752497                 |
| 1014              | Carrhenes calidius     | Pyrginae         | 06-SRNP-23245       | MHAHJ547-07           | JF752500                 |
| 1015              | Carrhenes calidius     | Pyrginae         | 97-SRNP-5991        | CSCR050-04            | DQ291964                 |
| 1016              | Carrhenes calidius     | Pyrginae         | 05-SRNP-41905       | MHAHF325-06           | GU150309                 |
| 1017              | Carrhenes calidius     | Pyrginae         | 05-SRNP-41664       | MHAHF323-06           | GU150310                 |
| 1018              | Carrhenes calidius     | Pyrginae         | 08-SRNP-4738        | MHMXX517-09           | JF777718                 |
| 1019              | Carrhenes calidius     | Pyrginae         | 08-SRNP-4735        | MHMXX516-09           | JF777717                 |
| 1020              | Carrhenes calidius     | Pyrginae         | 08-SRNP-4737        | MHMXX515-09           | JF777716                 |
| 1021              | Carrhenes calidius     | Pyrginae         | 08-SRNP-4736        | MHMXX514-09           | JF777715                 |
| 1022              | Carrhenes calidius     | Pyrginae         | 08-SRNP-21817       | MHMXX877-09           | JF777723                 |
| 1023              | Carrhenes calidius     | Pyrginae         | 08-SRNP-20689       | MHMXX875-09           | JF777721                 |
| 1024              | Carrhenes calidius     | Pyrginae         | 08-SRNP-21489       | MHMXX873-09           | JF777720                 |
| 1025              | Carrhenes calidius     | Pyrginae         | 08-SRNP-20418       | MHMXX872-09           | JF777719                 |
| 1026              | Carrhenes calidius     | Pyrginae         | 06-SRNP-46362       | MHAHJ728-07           | JF752503                 |
| 1027              | Carrhenes calidius     | Pyrginae         | 06-SRNP-23272       | MHAHJ715-07           | JF752502                 |
| 1028              | Carrhenes calidius     | Pyrginae         | 06-SRNP-23273       | MHAHJ493-07           | JF752499                 |
| 1029              | Carrhenes calidius     | Pyrginae         | 06-SRNP-23275       | MHAHJ492-07           | JF752498                 |
| 1030              | Carrhenes calidius     | Pyrginae         | 06-SRNP-42412       | MHAHI614-06           | GU155855                 |
| 1031              | Carrhenes calidius     | Pyrginae         | 06-SRNP-42408       | MHAHI613-06           | GU155856                 |
| 1032              | Carrhenes calidius     | Pyrginae         | 04-SRNP-42196       | MHAHE064-05           | GU149471                 |
| 1033              | Carrhenes calidius     | Pyrginae         | 04-SRNP-49279       | MHAHE063-05           | GU149473                 |
| 1034              | Carrhenes calidius     | Pyrginae         | 03-SRNP-37789       | MHAHE062-05           | GU149472                 |
| 1035              | Carrhenes calidius     | Pyrginae         | 04-SRNP-40341       | MHAHC184-05           | DQ291966                 |
| 1036              | Carrhenes calidius     | Pyrginae         | 05-SRNP-4276        | MHAHF326-06           | GU150308                 |
| 1037              | Carrhenes calidius     | Pyrginae         | 05-SRNP-25254       | MHAHF711-06           | GU150307                 |
| 1038              | Carrhenes calidius     | Pyrginae         | 06-SRNP-22483       | MHAHJ548-07           | JF752501                 |
| 1039              | Carrhenes calidius     | Pyrginae         | 09-SRNP-21630       | MHMYG2380-10          | HM885803                 |
| 1040              | Carrhenes fuscescens   | Pyrginae         | 92-SRNP-3412        | MHMYH1672-10          | HQ992680                 |
| 1041              | Carrhenes fuscescens   | Pyrginae         | 95-SRNP-6803        | MHMYH1674-10          | HQ992681                 |
| 1042              | Carrhenes fuscescens   | Pyrginae         | 95-SRNP-6809        | MHMYH1670-10          | HQ992679                 |
| 1043              | Carrhenes fuscescens   | Pyrginae         | 96-SRNP-7811        | MHMYH1669-10          | HQ992678                 |
| 1044              | Carrhenes fuscescens   | Pyrginae         | 95-SRNP-6818        | MHMYH1668-10          | HQ992677                 |
| 1045              | Carrhenes fuscescens   | Pyrginae         | 95-SRNP-6813        | MHMYH1667-10          | HQ992676                 |
| 1046              | Carrhenes fuscescens   | Pyrginae         | 95-SRNP-6806        | MHMYH1666-10          | HQ992675                 |
| 1047              | Carrhenes fuscescens   | Pyrginae         | 95-SRNP-6801        | MHMYH1665-10          | HQ992674                 |
| 1048              | Carrhenes fuscescens   | Pyrginae         | 95-SRNP-6819        | CSCR055-04            | DQ291972                 |
| 1049              | Carrhenes fuscescens   | Pyrginae         | 95-SRNP-6804        | MHMYH1675-10          | HQ992682                 |
| 1050              | Carrhenes fuscescens   | Pyrginae         | 92-SRNP-3012        | CSCR054-04            | DQ291971                 |
| 1051              | Carrhenes fuscescens   | Pyrginae         | 92-SRNP-3014        | MHMYH1676-10          | HQ992683                 |
| 1052              | Carrhenes fuscescens   | Pyrginae         | 93-SRNP-1137        | MHMYH1677-10          | HQ992684                 |
| 1053              | Carrhenes fuscescens   | Pyrginae         | 95-SRNP-6820        | MHMYH1678-10          | HQ992685                 |
| 1054              | Carrhenes fuscescens   | Pyrginae         | 92-SRNP-3004        | MHMYH1679-10          | HQ992686                 |
| 1055              | Carrhenes fuscescens   | Pyrginae         | 92-SRNP-3393        | MHMYH1680-10          | HQ992687                 |
| 1056              | Anisochoria polysticta | Pyrginae         | 03-SRNP-26746       | CSCR302-04            | DQ291810                 |
| 1057              | Anisochoria polysticta | Pyrginae         | 98-SRNP-12227       | CSCR477-04            | DQ291811                 |
| 1058              | Anisochoria polysticta | Pyrginae         | 04-SRNP-15485       | MHAHD064-05           | GU161224                 |
| 1059              | Anisochoria polysticta | Pyrginae         | 04-SRNP-15751       | MHAHD065-05           | GU161225                 |
| 1060              | Anisochoria polysticta | Pyrginae         | 04-SRNP-15486       | MHAHD066-05           | GU161223                 |
| 1061              | Anisochoria polysticta | Pyrginae         | 07-SRNP-55564       | MHAHK363-07           | JF760231                 |
| 1062              | Xenophanes tryxus      | Pyrginae         | 05-SRNP-55815       | MHAHF291-06           | GU151038                 |
| 1063              | Xenophanes tryxus      | Pyrginae         | 04-SRNP-23772       | MHAHD690-05           | GU162044                 |

| Tree Order | Species                  | Subfamily | ACG Sampleid  | BOLD Processid | Genbank Accession |
|------------|--------------------------|-----------|---------------|----------------|-------------------|
| 1064       | Xenophanes tryxus        | Pyrginae  | 08-SRNP-709   | MHMXX884-09    | JF778632          |
| 1065       | Xenophanes tryxus        | Pyrginae  | 08-SRNP-40407 | MHMXT110-08    | JF763508          |
| 1066       | Xenophanes tryxus        | Pyrginae  | 08-SRNP-40406 | MHMXT109-08    | JF763509          |
| 1067       | Xenophanes tryxus        | Pyrginae  | 07-SRNP-42914 | MHMXR022-08    | JF763511          |
| 1068       | Xenophanes tryxus        | Pyrginae  | 07-SRNP-21825 | MHAHL197-07    | JF763505          |
| 1069       | Xenophanes tryxus        | Pyrginae  | 07-SRNP-42042 | MHAHL196-07    | JF763504          |
| 1070       | Xenophanes tryxus        | Pyrginae  | 07-SRNP-2177  | MHAHL195-07    | JF763503          |
| 1071       | Xenophanes tryxus        | Pyrginae  | 07-SRNP-2117  | MHAHL194-07    | JF763502          |
| 1072       | Xenophanes tryxus        | Pyrginae  | 07-SRNP-32155 | MHAHK367-07    | JF761318          |
| 1073       | Xenophanes tryxus        | Pyrginae  | 05-SRNP-55198 | MHAHD698-05    | GU162046          |
| 1074       | Xenophanes tryxus        | Pyrginae  | 04-SRNP-15683 | MHAHD697-05    | GU162042          |
| 1075       | Xenophanes tryxus        | Pyrginae  | 04-SRNP-41977 | MHAHD696-05    | GU162048          |
| 1076       | Xenophanes tryxus        | Pyrginae  | 04-SRNP-15686 | MHAHD695-05    | GU162047          |
| 1077       | Xenophanes tryxus        | Pyrginae  | 04-SRNP-23770 | MHAHD693-05    | GU162041          |
| 1078       | Xenophanes tryxus        | Pyrginae  | 04-SRNP-23767 | MHAHD692-05    | GU162043          |
| 1079       | Xenophanes tryxus        | Pyrginae  | 04-SRNP-23769 | MHAHD691-05    | GU162045          |
| 1080       | Xenophanes tryxus        | Pyrginae  | 04-SRNP-24073 | MHAHD694-05    | GU162049          |
| 1081       | Xenophanes tryxus        | Pyrginae  | 05-SRNP-30987 | MHAHF290-06    | GU151039          |
| 1082       | Xenophanes tryxus        | Pyrginae  | 08-SRNP-40408 | MHMXT108-08    | JF763510          |
| 1083       | Xenophanes tryxus        | Pyrginae  | 92-SRNP-4663  | CSCR293-04     | DQ293930          |
| 1084       | Xenophanes tryxus        | Pyrginae  | 93-SRNP-5818  | CSCR294-04     | DQ293931          |
| 1085       | Xenophanes tryxus        | Pyrginae  | 08-SRNP-40109 | MHMXT111-08    | JF763507          |
| 1086       | Xenophanes tryxus        | Pyrginae  | 08-SRNP-40108 | MHMXT112-08    | JF763506          |
| 1087       | Xenophanes tryxus        | Pyrginae  | 08-SRNP-652   | MHMXX879-09    | JF778627          |
| 1088       | Xenophanes tryxus        | Pyrginae  | 08-SRNP-653   | MHMXX880-09    | JF778628          |
| 1089       | Xenophanes tryxus        | Pyrginae  | 08-SRNP-650   | MHMXX881-09    | JF778629          |
| 1090       | Xenophanes tryxus        | Pyrginae  | 08-SRNP-710   | MHMXX882-09    | JF778630          |
| 1091       | Xenophanes tryxus        | Pyrginae  | 08-SRNP-1428  | MHMXX883-09    | JF778631          |
| 1092       | Xenophanes tryxus        | Pyrginae  | 09-SRNP-75047 | MHMYE1532-09   | HM391092          |
| 1093       | Xenophanes tryxus        | Pyrginae  | 09-SRNP-42129 | MHMYG2377-10   | HM885800          |
| 1094       | Carrhenes meridensis     | Pyrginae  | 97-SRNP-1522  | CSCR056-04     | DQ291973          |
| 1095       | Carrhenes canescensDHJ02 | Pyrginae  | 04-SRNP-47072 | MHAHC176-05    | DQ291970          |
| 1096       | Carrhenes canescensDHJ02 | Pyrginae  | 05-SRNP-65241 | MHAHF710-06    | GU150313          |
| 1097       | Carrhenes canescensDHJ02 | Pyrginae  | 04-SRNP-2161  | MHMYH1696-10   | HQ963287          |
| 1098       | Carrhenes canescensDHJ02 | Pyrginae  | 08-SRNP-1435  | MHMXX870-09    | JF777727          |
| 1099       | Carrhenes canescensDHJ02 | Pyrginae  | 07-SRNP-2297  | MHAHL193-07    | JF761756          |
| 1100       | Carrhenes canescensDHJ02 | Pyrginae  | 07-SRNP-57525 | MHAHL192-07    | JF761755          |
| 1101       | Carrhenes canescensDHJ02 | Pyrginae  | 05-SRNP-55226 | MHAHE066-05    | GU149476          |
| 1102       | Carrhenes canescensDHJ02 | Pyrginae  | 04-SRNP-40196 | CSRII111-04    | DQ291968          |
| 1103       | Carrhenes canescensDHJ02 | Pyrginae  | 94-SRNP-576   | MHMYH1690-10   | HQ963281          |
| 1104       | Carrhenes canescensDHJ02 | Pyrginae  | 97-SRNP-796   | MHMYH1692-10   | HQ963283          |
| 1105       | Carrhenes canescensDHJ02 | Pyrginae  | 98-SRNP-6223  | MHMYH1688-10   | HQ992695          |
| 1106       | Carrhenes canescensDHJ02 | Pyrginae  | 98-SRNP-2076  | MHMYH1687-10   | HQ992694          |
| 1107       | Carrhenes canescensDHJ02 | Pyrginae  | 98-SRNP-2077  | MHMYH1686-10   | HQ992693          |
| 1108       | Carrhenes canescensDHJ02 | Pyrginae  | 09-SRNP-55887 | MHMYE1539-09   | HM391099          |
| 1109       | Carrhenes canescensDHJ02 | Pyrginae  | 08-SRNP-1302  | MHMXX874-09    | JF777728          |
| 1110       | Carrhenes canescensDHJ02 | Pyrginae  | 04-SRNP-35287 | MHAHC168-05    | DQ291969          |
| 1111       | Carrhenes canescensDHJ02 | Pyrginae  | 98-SRNP-2086  | MHMYH1681-10   | HQ992688          |
| 1112       | Carrhenes canescensDHJ02 | Pyrginae  | 06-SRNP-3394  | MHAHH223-06    | GU155212          |
| 1113       | Carrhenes canescensDHJ02 | Pyrginae  | 94-SRNP-572   | CSCR053-04     | DQ291967          |
| 1114       | Carrhenes canescensDHJ02 | Pyrginae  | 94-SRNP-598   | MHMYH1689-10   | JF751717          |
| 1115       | Carrhenes canescensDHJ02 | Pyrginae  | 00-SRNP-11710 | MHMYH1694-10   | HQ963285          |
| 1116       | Carrhenes canescensDHJ02 | Pyrginae  | 02-SRNP-32202 | MHMYH1699-10   | HQ963290          |
| 1117       | Carrhenes canescensDHJ02 | Pyrginae  | 98-SRNP-2075  | MHMYH1700-10   | HQ963291          |
| 1118       | Carrhenes canescensDHJ02 | Pyrginae  | 98-SRNP-6658  | MHMYH1702-10   | HQ963293          |
| 1119       | Carrhenes canescensDHJ02 | Pyrginae  | 99-SRNP-4815  | MHMYH1704-10   | HQ963295          |

| <b>Tree Order</b> | <b>Species</b>           | <b>Subfamily</b> | <b>ACG Sampleid</b> | <b>BOLD Processid</b> | <b>Genbank Accession</b> |
|-------------------|--------------------------|------------------|---------------------|-----------------------|--------------------------|
| 1120              | Carrhenes canescensDHJ01 | Pyrginae         | 08-SRNP-1544        | MHMXX871-09           | JF777726                 |
| 1121              | Carrhenes canescensDHJ01 | Pyrginae         | 01-SRNP-2081        | MHMYH1707-10          | HQ963298                 |
| 1122              | Carrhenes canescensDHJ01 | Pyrginae         | 96-SRNP-11205       | MHMYH1708-10          | HQ963299                 |
| 1123              | Carrhenes canescensDHJ01 | Pyrginae         | 99-SRNP-2264        | MHMYH1705-10          | HQ963296                 |
| 1124              | Carrhenes canescensDHJ01 | Pyrginae         | 99-SRNP-2257        | MHMYH1706-10          | HQ963297                 |
| 1125              | Carrhenes canescensDHJ01 | Pyrginae         | 02-SRNP-18792       | MHMYH1698-10          | HQ963289                 |
| 1126              | Carrhenes canescensDHJ01 | Pyrginae         | 98-SRNP-4264        | MHMYH1701-10          | HQ963292                 |
| 1127              | Carrhenes canescensDHJ01 | Pyrginae         | 04-SRNP-45774       | MHMYH1695-10          | HQ963286                 |
| 1128              | Carrhenes canescensDHJ01 | Pyrginae         | 01-SRNP-1279        | MHMYH1697-10          | HQ963288                 |
| 1129              | Carrhenes canescensDHJ01 | Pyrginae         | 98-SRNP-6283        | MHMYH1685-10          | HQ992692                 |
| 1130              | Carrhenes canescensDHJ01 | Pyrginae         | 97-SRNP-6032        | MHMYH1691-10          | HQ963282                 |
| 1131              | Carrhenes canescensDHJ01 | Pyrginae         | 98-SRNP-6194        | MHMYH1684-10          | HQ992691                 |
| 1132              | Carrhenes canescensDHJ01 | Pyrginae         | 98-SRNP-6497        | MHMYH1683-10          | HQ992690                 |
| 1133              | Carrhenes canescensDHJ01 | Pyrginae         | 98-SRNP-6704        | MHMYH1682-10          | HQ992689                 |
| 1134              | Carrhenes canescensDHJ01 | Pyrginae         | 08-SRNP-45047       | MHMXX869-09           | JF777725                 |
| 1135              | Carrhenes canescensDHJ01 | Pyrginae         | 07-SRNP-1460        | MHAHK703-07           | JF760461                 |
| 1136              | Carrhenes canescensDHJ01 | Pyrginae         | 06-SRNP-59186       | MHMXH876-07           | JF760460                 |
| 1137              | Carrhenes canescensDHJ01 | Pyrginae         | 06-SRNP-3104        | MHAHH426-06           | GU155213                 |
| 1138              | Carrhenes canescensDHJ01 | Pyrginae         | 06-SRNP-2357        | MHAHG825-06           | GU151224                 |
| 1139              | Carrhenes canescensDHJ01 | Pyrginae         | 06-SRNP-3298        | MHAHG824-06           | GU151223                 |
| 1140              | Carrhenes canescensDHJ01 | Pyrginae         | 04-SRNP-35258       | MHAHE067-05           | GU149475                 |
| 1141              | Carrhenes canescensDHJ01 | Pyrginae         | 00-SRNP-1813        | MHMYH1693-10          | HQ963284                 |
| 1142              | Carrhenes canescensDHJ01 | Pyrginae         | 04-SRNP-48517       | MHAHE065-05           | GU149474                 |
| 1143              | Carrhenes canescensDHJ01 | Pyrginae         | 05-SRNP-65401       | MHAHF709-06           | GU150312                 |
| 1144              | Carrhenes canescensDHJ01 | Pyrginae         | 98-SRNP-6890        | MHMYH1703-10          | HQ963294                 |
| 1145              | Carrhenes canescensDHJ01 | Pyrginae         | 97-SRNP-6031        | MHMYH1709-10          | HQ963300                 |
| 1146              | Atarnes sallei           | Pyrginae         | 06-SRNP-45182       | MHAHG802-06           | GU151206                 |
| 1147              | Atarnes sallei           | Pyrginae         | 06-SRNP-1582        | MHAHG154-06           | GU151204                 |
| 1148              | Atarnes sallei           | Pyrginae         | 07-SRNP-35256       | MHMXN421-07           | JF761670                 |
| 1149              | Atarnes sallei           | Pyrginae         | 08-SRNP-20794       | MHMXX861-09           | JF777640                 |
| 1150              | Atarnes sallei           | Pyrginae         | 06-SRNP-3263        | MHAHH475-06           | GU155202                 |
| 1151              | Atarnes sallei           | Pyrginae         | 05-SRNP-2058        | MHAHF307-06           | GU150256                 |
| 1152              | Atarnes sallei           | Pyrginae         | 08-SRNP-36067       | MHMXX530-09           | GU666354                 |
| 1153              | Atarnes sallei           | Pyrginae         | 08-SRNP-56142       | MHMXX863-09           | JF777641                 |
| 1154              | Atarnes sallei           | Pyrginae         | 07-SRNP-58936       | MHMXR917-08           | JF761668                 |
| 1155              | Atarnes sallei           | Pyrginae         | 07-SRNP-59529       | MHMXR916-08           | JF761669                 |
| 1156              | Atarnes sallei           | Pyrginae         | 06-SRNP-18572       | MHAHK713-07           | JF760396                 |
| 1157              | Atarnes sallei           | Pyrginae         | 06-SRNP-59199       | MHMXH871-07           | JF760397                 |
| 1158              | Atarnes sallei           | Pyrginae         | 06-SRNP-3340        | MHAHG801-06           | GU151205                 |
| 1159              | Atarnes sallei           | Pyrginae         | 06-SRNP-35204       | MHAHH476-06           | GU155201                 |
| 1160              | Atarnes sallei           | Pyrginae         | 05-SRNP-60344       | MHAHF685-06           | GU150259                 |
| 1161              | Atarnes sallei           | Pyrginae         | 05-SRNP-61255       | MHAHF684-06           | GU150258                 |
| 1162              | Atarnes sallei           | Pyrginae         | 05-SRNP-60346       | MHAHF683-06           | GU150257                 |
| 1163              | Atarnes sallei           | Pyrginae         | 06-SRNP-55198       | MHAHG155-06           | GU151203                 |
| 1164              | Atarnes sallei           | Pyrginae         | 95-SRNP-435         | CSCR042-04            | DQ291893                 |
| 1165              | Atarnes sallei           | Pyrginae         | 89-SRNP-92          | CSCR041-04            | DQ291892                 |
| 1166              | Atarnes sallei           | Pyrginae         | 06-SRNP-21052       | MHAHH479-06           | GU155204                 |
| 1167              | Atarnes sallei           | Pyrginae         | 06-SRNP-21070       | MHAHH480-06           | GU155203                 |
| 1168              | Atarnes sallei           | Pyrginae         | 06-SRNP-57921       | MHAHJ716-07           | JF752468                 |
| 1169              | Atarnes sallei           | Pyrginae         | 07-SRNP-56900       | MHAHK712-07           | JF760395                 |
| 1170              | Atarnes sallei           | Pyrginae         | 07-SRNP-65059       | MHMXN419-07           | JF761672                 |
| 1171              | Atarnes sallei           | Pyrginae         | 07-SRNP-65058       | MHMXN420-07           | JF761671                 |
| 1172              | Atarnes sallei           | Pyrginae         | 08-SRNP-56256       | MHMXX715-09           | JF777639                 |
| 1173              | Potamanaxas unifasciata  | Pyrginae         | 07-SRNP-2633        | MHMXN354-07           | JF762696                 |
| 1174              | Potamanaxas unifasciata  | Pyrginae         | 98-SRNP-2034        | CSRII740-05           | DQ293110                 |
| 1175              | Potamanaxas unifasciata  | Pyrginae         | 04-SRNP-805         | CSRII626-05           | DQ293108                 |

| <b>Tree Order</b> | <b>Species</b>          | <b>Subfamily</b> | <b>ACG Sampleid</b> | <b>BOLD Processid</b> | <b>Genbank Accession</b> |
|-------------------|-------------------------|------------------|---------------------|-----------------------|--------------------------|
| 1176              | Potamanaxas unifasciata | Pyrginae         | 05-SRNP-58611       | MHAHI644-06           | GU156284                 |
| 1177              | Potamanaxas unifasciata | Pyrginae         | 05-SRNP-35001       | MHAHI645-06           | GU156283                 |
| 1178              | Potamanaxas unifasciata | Pyrginae         | 94-SRNP-6414        | CSRII754-05           | DQ293118                 |
| 1179              | Potamanaxas unifasciata | Pyrginae         | 00-SRNP-12802       | CSRII744-05           | DQ293114                 |
| 1180              | Potamanaxas unifasciata | Pyrginae         | 00-SRNP-12804       | CSRII743-05           | DQ293113                 |
| 1181              | Potamanaxas unifasciata | Pyrginae         | 04-SRNP-363         | CSRII625-05           | DQ293107                 |
| 1182              | Potamanaxas unifasciata | Pyrginae         | 04-SRNP-365         | CSRII623-05           | DQ293105                 |
| 1183              | Potamanaxas unifasciata | Pyrginae         | 00-SRNP-12805       | CSRII741-05           | DQ293111                 |
| 1184              | Potamanaxas unifasciata | Pyrginae         | 04-SRNP-496         | CSRII624-05           | DQ293106                 |
| 1185              | Potamanaxas unifasciata | Pyrginae         | 98-SRNP-2036        | CSRII739-05           | DQ293109                 |
| 1186              | Potamanaxas unifasciata | Pyrginae         | 04-SRNP-364         | CSRII622-05           | DQ293104                 |
| 1187              | Potamanaxas unifasciata | Pyrginae         | 95-SRNP-433         | CSCR210-04            | DQ293100                 |
| 1188              | Potamanaxas unifasciata | Pyrginae         | 95-SRNP-437         | CSCR211-04            | DQ293101                 |
| 1189              | Potamanaxas unifasciata | Pyrginae         | 95-SRNP-441         | CSRII751-05           | DQ293115                 |
| 1190              | Potamanaxas unifasciata | Pyrginae         | 95-SRNP-436         | CSRII752-05           | DQ293116                 |
| 1191              | Potamanaxas unifasciata | Pyrginae         | 95-SRNP-438         | CSRII753-05           | DQ293117                 |
| 1192              | Potamanaxas unifasciata | Pyrginae         | 03-SRNP-4147        | CSCR398-04            | DQ293102                 |
| 1193              | Potamanaxas unifasciata | Pyrginae         | 03-SRNP-5425        | CSCR399-04            | DQ293103                 |
| 1194              | Potamanaxas unifasciata | Pyrginae         | 00-SRNP-12803       | CSRII742-05           | DQ293112                 |
| 1195              | Potamanaxas unifasciata | Pyrginae         | 06-SRNP-21553       | MHAHH473-06           | GU155463                 |
| 1196              | Potamanaxas unifasciata | Pyrginae         | 04-SRNP-2128        | MHAHC135-05           | DQ293119                 |
| 1197              | Potamanaxas unifasciata | Pyrginae         | 05-SRNP-35251       | MHAHI646-06           | GU156282                 |
| 1198              | Potamanaxas unifasciata | Pyrginae         | 08-SRNP-56559       | MHMXX524-09           | GU666357                 |
| 1199              | Milanion marciana       | Pyrginae         | 07-SRNP-41972       | MHMXXN353-07          | JF762339                 |
| 1200              | Milanion marciana       | Pyrginae         | 07-SRNP-1128        | MHAHK711-07           | JF760840                 |
| 1201              | Milanion marciana       | Pyrginae         | 04-SRNP-41660       | MHAHC151-05           | DQ292619                 |
| 1202              | Milanion marciana       | Pyrginae         | 04-SRNP-42477       | MHAHD810-05           | GU161593                 |
| 1203              | Milanion marciana       | Pyrginae         | 05-SRNP-188         | MHAHD812-05           | GU161592                 |
| 1204              | Milanion marciana       | Pyrginae         | 01-SRNP-5343        | CSCR125-04            | DQ292617                 |
| 1205              | Milanion marciana       | Pyrginae         | 01-SRNP-5185        | CSCR124-04            | DQ292616                 |
| 1206              | Milanion marciana       | Pyrginae         | 04-SRNP-41204       | MHAHC143-05           | DQ292618                 |
| 1207              | Milanion marciana       | Pyrginae         | 04-SRNP-42614       | MHAHD811-05           | GU161591                 |
| 1208              | Milanion marciana       | Pyrginae         | 05-SRNP-41228       | MHAHF292-06           | GU150532                 |
| 1209              | Milanion marciana       | Pyrginae         | 07-SRNP-42347       | MHMXXO966-08          | JF762340                 |
| 1210              | Milanion marciana       | Pyrginae         | 09-SRNP-42042       | MHMYH162-10           | HM887309                 |
| 1211              | Pythonides amaryllis    | Pyrginae         | 06-SRNP-7522        | MHAHJ760-07           | JF753107                 |
| 1212              | Pythonides amaryllis    | Pyrginae         | 07-SRNP-2293        | MHAHL251-07           | JF762733                 |
| 1213              | Pythonides amaryllis    | Pyrginae         | 07-SRNP-45416       | MHMXXO951-08          | JF762741                 |
| 1214              | Pythonides amaryllis    | Pyrginae         | 06-SRNP-65338       | MHAHJ713-07           | JF753105                 |
| 1215              | Pythonides amaryllis    | Pyrginae         | 07-SRNP-2936        | MHAHL252-07           | JF762734                 |
| 1216              | Pythonides amaryllis    | Pyrginae         | 07-SRNP-65576       | MHMXXR836-08          | JF762737                 |
| 1217              | Pythonides amaryllis    | Pyrginae         | 08-SRNP-70591       | MHMXXW426-09          | JF754123                 |
| 1218              | Pythonides amaryllis    | Pyrginae         | 07-SRNP-296         | MHAHK351-07           | JF761083                 |
| 1219              | Pythonides amaryllis    | Pyrginae         | 02-SRNP-547         | CSCR218-04            | DQ293156                 |
| 1220              | Pythonides amaryllis    | Pyrginae         | 07-SRNP-45759       | MHMXXR837-08          | JF762736                 |
| 1221              | Pythonides amaryllis    | Pyrginae         | 07-SRNP-45350       | MHMXXO953-08          | JF762739                 |
| 1222              | Pythonides amaryllis    | Pyrginae         | 07-SRNP-41120       | MHAHL254-07           | JF762735                 |
| 1223              | Pythonides amaryllis    | Pyrginae         | 07-SRNP-2294        | MHAHL250-07           | JF762732                 |
| 1224              | Pythonides amaryllis    | Pyrginae         | 07-SRNP-949         | MHAHK352-07           | JF761084                 |
| 1225              | Pythonides amaryllis    | Pyrginae         | 07-SRNP-30555       | MHMXXH892-07          | JF761081                 |
| 1226              | Pythonides amaryllis    | Pyrginae         | 07-SRNP-30884       | MHMXXH891-07          | JF761082                 |
| 1227              | Pythonides amaryllis    | Pyrginae         | 06-SRNP-65311       | MHAHJ712-07           | JF753104                 |
| 1228              | Pythonides amaryllis    | Pyrginae         | 06-SRNP-6930        | MHAHJ467-07           | JF753102                 |
| 1229              | Pythonides amaryllis    | Pyrginae         | 06-SRNP-9220        | MHAHJ466-07           | JF753101                 |
| 1230              | Pythonides amaryllis    | Pyrginae         | 06-SRNP-65571       | MHAHJ871-07           | JF753108                 |
| 1231              | Pythonides amaryllis    | Pyrginae         | 06-SRNP-7674        | MHAHJ759-07           | JF753106                 |

| Tree Order | Species                     | Subfamily | ACG Sampleid  | BOLD Processid | Genbank Accession |
|------------|-----------------------------|-----------|---------------|----------------|-------------------|
| 1232       | Pythonides amaryllis        | Pyrginae  | 02-SRNP-6320  | CSCR219-04     | DQ293157          |
| 1233       | Pythonides amaryllis        | Pyrginae  | 07-SRNP-45758 | MHMXO952-08    | JF762740          |
| 1234       | Pythonides amaryllis        | Pyrginae  | 06-SRNP-9644  | MHAHJ711-07    | JF753103          |
| 1235       | Pythonides amaryllis        | Pyrginae  | 07-SRNP-45250 | MHMXO950-08    | JF762742          |
| 1236       | Pythonides amaryllis        | Pyrginae  | 07-SRNP-65279 | MHMXO954-08    | JF762738          |
| 1237       | Pythonides amaryllis        | Pyrginae  | 08-SRNP-70034 | MHMXW427-09    | JF754124          |
| 1238       | Pythonides amaryllis        | Pyrginae  | 08-SRNP-71826 | MHMXW526-09    | JF754122          |
| 1239       | Pythonides pteras           | Pyrginae  | 05-SRNP-31884 | MHAHF172-06    | GU150740          |
| 1240       | Pythonides pteras           | Pyrginae  | 05-SRNP-31882 | MHAHF173-06    | GU150741          |
| 1241       | Pythonides pteras           | Pyrginae  | 05-SRNP-32629 | MHAHF174-06    | GU150742          |
| 1242       | Pythonides pteras           | Pyrginae  | 06-SRNP-32649 | MHAHI199-06    | GU156288          |
| 1243       | Pythonides pteras           | Pyrginae  | 06-SRNP-32650 | MHAHI200-06    | GU156289          |
| 1244       | Pythonides pteras           | Pyrginae  | 07-SRNP-32651 | MHAHL259-07    | JF762748          |
| 1245       | Morvina fissimacula pelarge | Pyrginae  | 07-SRNP-41267 | MHAHL240-07    | JF762347          |
| 1246       | Morvina fissimacula pelarge | Pyrginae  | 06-SRNP-31970 | MHAHH469-06    | GU155426          |
| 1247       | Morvina fissimacula pelarge | Pyrginae  | 06-SRNP-31945 | MHAHH468-06    | GU155427          |
| 1248       | Morvina fissimacula pelarge | Pyrginae  | 06-SRNP-32336 | MHAHH470-06    | GU155425          |
| 1249       | Morvina fissimacula pelarge | Pyrginae  | 02-SRNP-6631  | CSCR128-04     | DQ292632          |
| 1250       | Morvina fissimacula pelarge | Pyrginae  | 02-SRNP-6922  | CSCR129-04     | DQ292633          |
| 1251       | Morvina fissimacula pelarge | Pyrginae  | 06-SRNP-33952 | MHAHI534-06    | GU155997          |
| 1252       | Morvina fissimacula pelarge | Pyrginae  | 06-SRNP-34246 | MHAHI535-06    | GU155996          |
| 1253       | Morvina fissimacula pelarge | Pyrginae  | 06-SRNP-34680 | MHAHJ832-07    | JF752922          |
| 1254       | Morvina fissimacula pelarge | Pyrginae  | 06-SRNP-65215 | MHAHJ883-07    | JF752923          |
| 1255       | Morvina fissimacula pelarge | Pyrginae  | 04-SRNP-2511  | MHMXY1048-09   | GU666483          |
| 1256       | Morvina fissimacula pelarge | Pyrginae  | 08-SRNP-65933 | MHMXY1049-09   | GU666484          |
| 1257       | Ouleus cyrna                | Pyrginae  | 03-SRNP-22100 | CSRII402-04    | DQ292787          |
| 1258       | Ouleus cyrna                | Pyrginae  | 00-SRNP-23507 | CSRII361-04    | DQ292786          |
| 1259       | Ouleus cyrna                | Pyrginae  | 03-SRNP-22212 | CSRII403-04    | DQ292788          |
| 1260       | Ouleus cyrna                | Pyrginae  | 06-SRNP-35224 | MHAHH463-06    | GU155441          |
| 1261       | Zera hosta                  | Pyrginae  | 02-SRNP-24501 | CSCR296-04     | DQ293943          |
| 1262       | Zera hosta                  | Pyrginae  | 02-SRNP-24500 | CSCR295-04     | DQ293942          |
| 1263       | Zera hosta                  | Pyrginae  | 03-SRNP-3007  | MHAHH106-06    | GU155726          |
| 1264       | Zera hosta                  | Pyrginae  | 03-SRNP-3008  | MHAHH107-06    | GU155727          |
| 1265       | Zera hosta                  | Pyrginae  | 02-SRNP-24498 | MHAHH109-06    | GU155725          |
| 1266       | Zera Burns01DHJ03           | Pyrginae  | 07-SRNP-41866 | MHAHL169-07    | JF763528          |
| 1267       | Zera Burns01DHJ03           | Pyrginae  | 06-SRNP-6823  | MHAHJ489-07    | JF753271          |
| 1268       | Zera Burns01DHJ03           | Pyrginae  | 08-SRNP-4248  | MHMXW537-09    | JF754434          |
| 1269       | Zera Burns01DHJ02           | Pyrginae  | 06-SRNP-22961 | MHAHJ702-07    | JF753270          |
| 1270       | Zera Burns01DHJ02           | Pyrginae  | 06-SRNP-9109  | MHAHJ601-07    | JF753269          |
| 1271       | Zera Burns01DHJ02           | Pyrginae  | 06-SRNP-9107  | MHAHJ490-07    | JF753267          |
| 1272       | Zera Burns01DHJ02           | Pyrginae  | 06-SRNP-9105  | MHAHJ488-07    | JF753266          |
| 1273       | Zera Burns01DHJ02           | Pyrginae  | 02-SRNP-24499 | MHAHH111-06    | GU155728          |
| 1274       | Zera Burns01DHJ02           | Pyrginae  | 02-SRNP-24503 | MHAHH110-06    | GU155729          |
| 1275       | Zera Burns01DHJ02           | Pyrginae  | 02-SRNP-4228  | MHAHH108-06    | GU155730          |
| 1276       | Zera Burns01DHJ02           | Pyrginae  | 05-SRNP-23870 | MHAHF612-06    | GU151041          |
| 1277       | Zera Burns01DHJ02           | Pyrginae  | 05-SRNP-55739 | MHAHF117-06    | GU151040          |
| 1278       | Zera Burns01DHJ02           | Pyrginae  | 06-SRNP-9106  | MHAHJ546-07    | JF753268          |
| 1279       | Zera Burns01DHJ02           | Pyrginae  | 07-SRNP-32559 | MHMXXK033-07   | JF763527          |
| 1280       | Zera Burns01DHJ02           | Pyrginae  | 07-SRNP-3659  | MHMXP173-08    | JF763526          |
| 1281       | Zera Burns01DHJ02           | Pyrginae  | 08-SRNP-56931 | MHMXW536-09    | JF754433          |
| 1282       | Zera Burns01DHJ02           | Pyrginae  | 08-SRNP-56930 | MHMXX529-09    | JF778649          |
| 1283       | Gindanes brontinus          | Pyrginae  | 08-SRNP-57236 | MHMXX518-09    | JF777978          |
| 1284       | Gindanes brontinus          | Pyrginae  | 06-SRNP-58321 | MHMXH875-07    | JF760738          |
| 1285       | Gindanes brontinus          | Pyrginae  | 05-SRNP-63509 | MHAHF609-06    | GU150454          |
| 1286       | Gindanes brontinus          | Pyrginae  | 05-SRNP-65501 | MHAHF607-06    | GU150452          |
| 1287       | Gindanes brontinus          | Pyrginae  | 04-SRNP-14564 | MHAHF115-06    | GU150450          |

| <b>Tree Order</b> | <b>Species</b>        | <b>Subfamily</b> | <b>ACG Sampleid</b> | <b>BOLD Processid</b> | <b>Genbank Accession</b> |
|-------------------|-----------------------|------------------|---------------------|-----------------------|--------------------------|
| 1288              | Gindanes brontinus    | Pyrginae         | 04-SRNP-14565       | MHAHD681-05           | GU161532                 |
| 1289              | Gindanes brontinus    | Pyrginae         | 94-SRNP-15.1        | CSCR111-04            | DQ292511                 |
| 1290              | Gindanes brontinus    | Pyrginae         | 94-SRNP-10          | CSCR110-04            | DQ292510                 |
| 1291              | Gindanes brontinus    | Pyrginae         | 04-SRNP-14563       | MHAHD682-05           | GU161533                 |
| 1292              | Gindanes brontinus    | Pyrginae         | 05-SRNP-64401       | MHAHF608-06           | GU150451                 |
| 1293              | Gindanes brontinus    | Pyrginae         | 05-SRNP-65494       | MHAHF606-06           | GU150453                 |
| 1294              | Gindanes brontinus    | Pyrginae         | 08-SRNP-57426       | MHMXX519-09           | JF777979                 |
| 1295              | Pythonides proxenus   | Pyrginae         | 07-SRNP-42356       | MHMXO948-08           | JF762747                 |
| 1296              | Pythonides proxenus   | Pyrginae         | 06-SRNP-6782        | MHAHJ837-07           | JF753111                 |
| 1297              | Pythonides proxenus   | Pyrginae         | 06-SRNP-23081       | MHAHJ541-07           | JF753110                 |
| 1298              | Pythonides proxenus   | Pyrginae         | 04-SRNP-41615       | MHAHE086-05           | GU149873                 |
| 1299              | Pythonides proxenus   | Pyrginae         | 04-SRNP-26794       | MHAHF171-06           | GU150738                 |
| 1300              | Pythonides proxenus   | Pyrginae         | 02-SRNP-20155       | CSCR220-04            | DQ293158                 |
| 1301              | Pythonides proxenus   | Pyrginae         | 02-SRNP-20156       | CSCR221-04            | DQ293159                 |
| 1302              | Pythonides proxenus   | Pyrginae         | 07-SRNP-21605       | MHAHL258-07           | JF762744                 |
| 1303              | Pythonides proxenus   | Pyrginae         | 07-SRNP-21699       | MHAHL257-07           | JF762743                 |
| 1304              | Pythonides proxenus   | Pyrginae         | 08-SRNP-40390       | MHMXT199-08           | JF762745                 |
| 1305              | Pythonides proxenus   | Pyrginae         | 09-SRNP-22673       | MHMYH155-10           | HM887303                 |
| 1306              | Pythonides proxenus   | Pyrginae         | 04-SRNP-26795       | MHAHF170-06           | GU150739                 |
| 1307              | Pythonides proxenus   | Pyrginae         | 06-SRNP-44676       | MHAHK355-07           | JF761087                 |
| 1308              | Pythonides proxenus   | Pyrginae         | 07-SRNP-3103        | MHMXO947-08           | JF762746                 |
| 1309              | Pythonides proxenus   | Pyrginae         | 06-SRNP-36323       | MHMXH889-07           | JF761085                 |
| 1310              | Pythonides proxenus   | Pyrginae         | 06-SRNP-44677       | MHAHK354-07           | JF761086                 |
| 1311              | Pythonides proxenus   | Pyrginae         | 06-SRNP-43506       | MHAHI549-06           | GU156287                 |
| 1312              | Pythonides proxenus   | Pyrginae         | 06-SRNP-22943       | MHAHJ540-07           | JF753109                 |
| 1313              | Pythonides proxenus   | Pyrginae         | 04-SRNP-60627       | MHAHE085-05           | GU149871                 |
| 1314              | Pythonides proxenus   | Pyrginae         | 04-SRNP-45116       | MHAHE087-05           | GU149872                 |
| 1315              | Pythonides proxenus   | Pyrginae         | 08-SRNP-1431        | MHMXXW431-09          | JF754125                 |
| 1316              | Pythonides proxenus   | Pyrginae         | 09-SRNP-20219       | MHMYH154-10           | HM887302                 |
| 1317              | Pythonides proxenus   | Pyrginae         | 09-SRNP-20218       | MHMYH156-10           | HM887304                 |
| 1318              | Pythonides proxenus   | Pyrginae         | 09-SRNP-20220       | MHMYG2504-10          | HM885933                 |
| 1319              | Quadrus francesius    | Pyrginae         | 04-SRNP-3839        | MHAHE089-05           | GU149883                 |
| 1320              | Quadrus francesius    | Pyrginae         | 04-SRNP-4110        | MHAHE090-05           | GU149884                 |
| 1321              | Quadrus francesius    | Pyrginae         | 06-SRNP-7067        | MHAHJ754-07           | JF753114                 |
| 1322              | Quadrus francesius    | Pyrginae         | 06-SRNP-7066        | MHAHJ836-07           | JF753115                 |
| 1323              | Quadrus francesius    | Pyrginae         | 08-SRNP-4233        | MHMXXW428-09          | JF754141                 |
| 1324              | Quadrus francesius    | Pyrginae         | 08-SRNP-4232        | MHMXXW429-09          | JF754142                 |
| 1325              | Quadrus francesius    | Pyrginae         | 05-SRNP-5074        | MHAHF321-06           | GU150744                 |
| 1326              | Quadrus francesius    | Pyrginae         | 05-SRNP-31504       | MHAHF186-06           | GU150743                 |
| 1327              | Quadrus francesius    | Pyrginae         | 04-SRNP-2313        | MHAHC725-05           | DQ293179                 |
| 1328              | Quadrus francesius    | Pyrginae         | 07-SRNP-21126       | MHMXXK034-07          | JF762762                 |
| 1329              | Quadrus francesius    | Pyrginae         | 05-SRNP-21430       | MHAHF184-06           | GU150745                 |
| 1330              | Quadrus francesius    | Pyrginae         | 05-SRNP-60          | MHAHE092-05           | GU149882                 |
| 1331              | Quadrus francesius    | Pyrginae         | 05-SRNP-62          | MHAHE091-05           | GU149885                 |
| 1332              | Quadrus francesius    | Pyrginae         | 04-SRNP-4111        | MHAHE088-05           | GU149881                 |
| 1333              | Quadrus francesius    | Pyrginae         | 05-SRNP-30292       | MHAHC731-05           | DQ293180                 |
| 1334              | Quadrus francesius    | Pyrginae         | 04-SRNP-3262        | MHAHC724-05           | DQ293178                 |
| 1335              | Quadrus francesius    | Pyrginae         | 03-SRNP-5537        | CSCR567-04            | DQ293176                 |
| 1336              | Quadrus francesius    | Pyrginae         | 03-SRNP-5745        | CSCR568-04            | DQ293177                 |
| 1337              | Quadrus francesius    | Pyrginae         | 08-SRNP-30995       | MHMXXW430-09          | JF754143                 |
| 1338              | Quadrus francesius    | Pyrginae         | 09-SRNP-80528       | MHMYG2008-10          | JF751939                 |
| 1339              | Quadrus contubernalis | Pyrginae         | 01-SRNP-2577        | CSCR222-04            | DQ293169                 |
| 1340              | Quadrus contubernalis | Pyrginae         | 07-SRNP-2968        | MHAHL256-07           | JF762761                 |
| 1341              | Quadrus contubernalis | Pyrginae         | 08-SRNP-794         | MHMXXW432-09          | JF754139                 |
| 1342              | Quadrus contubernalis | Pyrginae         | 04-SRNP-3684        | MHAHE084-05           | GU149879                 |
| 1343              | Quadrus contubernalis | Pyrginae         | 04-SRNP-3683        | MHAHE083-05           | GU149880                 |



| Tree Order | Species                | Subfamily | ACG Sampleid  | BOLD Processid | Genbank Accession |
|------------|------------------------|-----------|---------------|----------------|-------------------|
| 1344       | Quadrus contubernalis  | Pyrginae  | 04-SRNP-60962 | MHAHC749-05    | DQ293174          |
| 1345       | Quadrus contubernalis  | Pyrginae  | 04-SRNP-4515  | MHAHC746-05    | DQ293173          |
| 1346       | Quadrus contubernalis  | Pyrginae  | 04-SRNP-4514  | MHAHC745-05    | DQ293172          |
| 1347       | Quadrus contubernalis  | Pyrginae  | 04-SRNP-3680  | MHAHC744-05    | DQ293171          |
| 1348       | Quadrus contubernalis  | Pyrginae  | 02-SRNP-19658 | CSCR223-04     | DQ293170          |
| 1349       | Quadrus contubernalis  | Pyrginae  | 04-SRNP-60961 | MHAHC750-05    | DQ293175          |
| 1350       | Quadrus contubernalis  | Pyrginae  | 06-SRNP-2063  | MHAHG793-06    | GU151594          |
| 1351       | Quadrus contubernalis  | Pyrginae  | 06-SRNP-2062  | MHAHG794-06    | GU151593          |
| 1352       | Quadrus contubernalis  | Pyrginae  | 06-SRNP-2192  | MHAHG795-06    | GU151595          |
| 1353       | Quadrus contubernalis  | Pyrginae  | 06-SRNP-3969  | MHAHH411-06    | GU155487          |
| 1354       | Quadrus contubernalis  | Pyrginae  | 06-SRNP-7060  | MHAHJ468-07    | JF753112          |
| 1355       | Quadrus contubernalis  | Pyrginae  | 06-SRNP-7061  | MHAHJ755-07    | JF753113          |
| 1356       | Quadrus contubernalis  | Pyrginae  | 07-SRNP-1429  | MHAHK353-07    | JF761089          |
| 1357       | Quadrus contubernalis  | Pyrginae  | 07-SRNP-2969  | MHAHL255-07    | JF762760          |
| 1358       | Quadrus contubernalis  | Pyrginae  | 08-SRNP-793   | MHMXW444-09    | JF754140          |
| 1359       | Ouleus dilla baruDHJ01 | Pyrginae  | 02-SRNP-29    | CSRII373-04    | DQ292790          |
| 1360       | Ouleus dilla baruDHJ01 | Pyrginae  | 05-SRNP-34972 | MHAHF802-06    | GU150637          |
| 1361       | Ouleus dilla baruDHJ01 | Pyrginae  | 06-SRNP-44270 | MHAHJ534-07    | JF752945          |
| 1362       | Ouleus dilla baruDHJ01 | Pyrginae  | 08-SRNP-40639 | MHMXX1121-09   | JF778158          |
| 1363       | Ouleus dilla baruDHJ02 | Pyrginae  | 05-SRNP-314   | MHAHF097-06    | GU150634          |
| 1364       | Ouleus dilla baruDHJ02 | Pyrginae  | 04-SRNP-40712 | MHAHD793-05    | GU161713          |
| 1365       | Ouleus dilla baruDHJ02 | Pyrginae  | 04-SRNP-4906  | MHAHD792-05    | GU161712          |
| 1366       | Ouleus dilla baruDHJ02 | Pyrginae  | 04-SRNP-42883 | MHAHD790-05    | GU161710          |
| 1367       | Ouleus dilla baruDHJ02 | Pyrginae  | 04-SRNP-3168  | MHAHD788-05    | GU161711          |
| 1368       | Ouleus dilla baruDHJ02 | Pyrginae  | 03-SRNP-5456  | CSRII392-04    | DQ292795          |
| 1369       | Ouleus dilla baruDHJ02 | Pyrginae  | 01-SRNP-25074 | CSRII371-04    | DQ292789          |
| 1370       | Ouleus dilla baruDHJ02 | Pyrginae  | 02-SRNP-21428 | CSRII386-04    | DQ292793          |
| 1371       | Ouleus dilla baruDHJ02 | Pyrginae  | 02-SRNP-18307 | CSRII385-04    | DQ292792          |
| 1372       | Ouleus dilla baruDHJ02 | Pyrginae  | 03-SRNP-5228  | CSRII391-04    | DQ292794          |
| 1373       | Ouleus dilla baruDHJ02 | Pyrginae  | 02-SRNP-1148  | CSRII374-04    | DQ292791          |
| 1374       | Ouleus dilla baruDHJ02 | Pyrginae  | 05-SRNP-41777 | MHAHF061-06    | GU150633          |
| 1375       | Ouleus dilla baruDHJ02 | Pyrginae  | 05-SRNP-30721 | MHAHF096-06    | GU150635          |
| 1376       | Ouleus dilla baruDHJ02 | Pyrginae  | 05-SRNP-7449  | MHAHF791-06    | GU150636          |
| 1377       | Ouleus dilla baruDHJ02 | Pyrginae  | 06-SRNP-31341 | MHAHG753-06    | GU151509          |
| 1378       | Ouleus dilla baruDHJ02 | Pyrginae  | 07-SRNP-42528 | MHMXR053-08    | JF762483          |
| 1379       | Ouleus dilla baruDHJ02 | Pyrginae  | 08-SRNP-72306 | MHMXX590-09    | JF778159          |
| 1380       | Ouleus dilla baruDHJ02 | Pyrginae  | 08-SRNP-72304 | MHMXX591-09    | JF778160          |
| 1381       | Ouleus dilla baruDHJ02 | Pyrginae  | 09-SRNP-80444 | MHMYG2486-10   | HM885913          |
| 1382       | Ouleus Burns01         | Pyrginae  | 04-SRNP-4356  | MHAHD787-05    | GU161709          |
| 1383       | Ouleus Burns01         | Pyrginae  | 03-SRNP-5719  | CSRII393-04    | DQ292785          |
| 1384       | Ouleus Burns01         | Pyrginae  | 06-SRNP-45127 | MHAHG748-06    | GU151508          |
| 1385       | Ouleus Burns01         | Pyrginae  | 06-SRNP-8586  | MHAHJ465-07    | JF752943          |
| 1386       | Ouleus Burns01         | Pyrginae  | 06-SRNP-8585  | MHAHJ536-07    | JF752944          |
| 1387       | Ouleus negrus          | Pyrginae  | 04-SRNP-491   | MHAHI243-06    | GU156032          |
| 1388       | Ouleus negrus          | Pyrginae  | 98-SRNP-6834  | CSRII348-04    | DQ292796          |
| 1389       | Ouleus negrus          | Pyrginae  | 02-SRNP-2323  | MHAHI244-06    | GU156031          |
| 1390       | Ouleus negrus          | Pyrginae  | 02-SRNP-5597  | CSRII378-04    | DQ292797          |
| 1391       | Ouleus negrus          | Pyrginae  | 00-SRNP-162   | MHAHI246-06    | GU156033          |
| 1392       | Ouleus negrus          | Pyrginae  | 03-SRNP-34272 | CSRII411-04    | DQ292799          |
| 1393       | Ouleus negrus          | Pyrginae  | 03-SRNP-6700  | CSRII394-04    | DQ292798          |
| 1394       | Ouleus negrus          | Pyrginae  | 00-SRNP-14610 | MHAHI245-06    | GU156034          |
| 1395       | Ouleus negrus          | Pyrginae  | 07-SRNP-2215  | MHAHL150-07    | JF762484          |
| 1396       | Ouleus negrus          | Pyrginae  | 07-SRNP-2470  | MHAHL163-07    | JF762485          |
| 1397       | Quadrus cerialisDHJ01  | Pyrginae  | 08-SRNP-65628 | MHMXW441-09    | JF754126          |
| 1398       | Quadrus cerialisDHJ02  | Pyrginae  | 08-SRNP-70040 | MHMXW434-09    | JF754127          |
| 1399       | Quadrus cerialisDHJ03  | Pyrginae  | 04-SRNP-55879 | MHAHE093-05    | GU149875          |

| <b>Tree Order</b> | <b>Species</b>        | <b>Subfamily</b> | <b>ACG Sampleid</b> | <b>BOLD Processid</b> | <b>Genbank Accession</b> |
|-------------------|-----------------------|------------------|---------------------|-----------------------|--------------------------|
| 1400              | Quadrus cerialisDHJ03 | Pyrginae         | 04-SRNP-55680       | MHAHC730-05           | DQ293165                 |
| 1401              | Quadrus cerialisDHJ03 | Pyrginae         | 07-SRNP-65780       | MHM XR772-08          | JF762753                 |
| 1402              | Quadrus cerialisDHJ03 | Pyrginae         | 05-SRNP-32312       | MHM XN259-07          | JF762755                 |
| 1403              | Quadrus cerialisDHJ03 | Pyrginae         | 05-SRNP-32317       | MHM XN257-07          | JF762757                 |
| 1404              | Quadrus cerialisDHJ03 | Pyrginae         | 04-SRNP-49439       | MHAHE097-05           | GU149878                 |
| 1405              | Quadrus cerialisDHJ03 | Pyrginae         | 04-SRNP-49987       | MHAHC734-05           | DQ293168                 |
| 1406              | Quadrus cerialisDHJ03 | Pyrginae         | 04-SRNP-15284       | MHAHC732-05           | DQ293166                 |
| 1407              | Quadrus cerialisDHJ03 | Pyrginae         | 04-SRNP-49389       | MHAHC729-05           | DQ293164                 |
| 1408              | Quadrus cerialisDHJ03 | Pyrginae         | 04-SRNP-23614       | MHAHE096-05           | GU149877                 |
| 1409              | Quadrus cerialisDHJ03 | Pyrginae         | 07-SRNP-66046       | MHM XR773-08          | JF762752                 |
| 1410              | Quadrus cerialisDHJ03 | Pyrginae         | 05-SRNP-31921       | MHM XN256-07          | JF762758                 |
| 1411              | Quadrus cerialisDHJ03 | Pyrginae         | 03-SRNP-3074        | CSCR405-04            | DQ293161                 |
| 1412              | Quadrus cerialisDHJ03 | Pyrginae         | 08-SRNP-40247       | MHM XT197-08          | JF762750                 |
| 1413              | Quadrus cerialisDHJ03 | Pyrginae         | 03-SRNP-3037        | CSCR404-04            | DQ293160                 |
| 1414              | Quadrus cerialisDHJ03 | Pyrginae         | 08-SRNP-40381       | MHM XT198-08          | JF762749                 |
| 1415              | Quadrus cerialisDHJ03 | Pyrginae         | 08-SRNP-45059       | MHM XW435-09          | JF754128                 |
| 1416              | Quadrus cerialisDHJ03 | Pyrginae         | 08-SRNP-1036        | MHM XW439-09          | JF754132                 |
| 1417              | Quadrus cerialisDHJ03 | Pyrginae         | 08-SRNP-70469       | MHM XW440-09          | JF754133                 |
| 1418              | Quadrus cerialisDHJ03 | Pyrginae         | 08-SRNP-65398       | MHM XW442-09          | JF754134                 |
| 1419              | Quadrus cerialisDHJ03 | Pyrginae         | 04-SRNP-49986       | MHAHC728-05           | DQ293163                 |
| 1420              | Quadrus cerialisDHJ03 | Pyrginae         | 06-SRNP-36670       | MHM XH890-07          | JF761088                 |
| 1421              | Quadrus cerialisDHJ03 | Pyrginae         | 06-SRNP-3782        | MHAHH410-06           | GU155486                 |
| 1422              | Quadrus cerialisDHJ03 | Pyrginae         | 04-SRNP-14171       | MHAHE095-05           | GU149876                 |
| 1423              | Quadrus cerialisDHJ03 | Pyrginae         | 04-SRNP-23615       | MHAHE094-05           | GU149874                 |
| 1424              | Quadrus cerialisDHJ03 | Pyrginae         | 04-SRNP-15266       | MHAHC733-05           | DQ293167                 |
| 1425              | Quadrus cerialisDHJ03 | Pyrginae         | 04-SRNP-56788       | MHAHC727-05           | DQ293162                 |
| 1426              | Quadrus cerialisDHJ03 | Pyrginae         | 08-SRNP-65058       | MHM XT196-08          | JF762751                 |
| 1427              | Quadrus cerialisDHJ03 | Pyrginae         | 08-SRNP-2098        | MHM XW437-09          | JF754130                 |
| 1428              | Quadrus cerialisDHJ03 | Pyrginae         | 08-SRNP-71737       | MHM XW445-09          | JF754136                 |
| 1429              | Quadrus cerialisDHJ03 | Pyrginae         | 08-SRNP-70012       | MHM XW446-09          | JF754137                 |
| 1430              | Quadrus cerialisDHJ03 | Pyrginae         | 08-SRNP-1186        | MHM XW447-09          | JF754138                 |
| 1431              | Quadrus cerialisDHJ03 | Pyrginae         | 08-SRNP-72329       | MHM XY1028-09         | GU666500                 |
| 1432              | Quadrus cerialisDHJ03 | Pyrginae         | 09-SRNP-66024       | MHM YH130-10          | HM887281                 |
| 1433              | Quadrus cerialisDHJ03 | Pyrginae         | 09-SRNP-75200       | MHM YH131-10          | HM887282                 |
| 1434              | Quadrus cerialisDHJ03 | Pyrginae         | 08-SRNP-45063       | MHM XW436-09          | JF754129                 |
| 1435              | Quadrus cerialisDHJ03 | Pyrginae         | 07-SRNP-66047       | MHM XR771-08          | JF762754                 |
| 1436              | Quadrus cerialisDHJ03 | Pyrginae         | 05-SRNP-32596       | MHM XN258-07          | JF762756                 |
| 1437              | Quadrus cerialisDHJ03 | Pyrginae         | 07-SRNP-42399       | MHM XO949-08          | JF762759                 |
| 1438              | Quadrus cerialisDHJ03 | Pyrginae         | 08-SRNP-70496       | MHM XW438-09          | JF754131                 |
| 1439              | Quadrus cerialisDHJ03 | Pyrginae         | 08-SRNP-65610       | MHM XW443-09          | JF754135                 |
| 1440              | Quadrus cerialisDHJ03 | Pyrginae         | 08-SRNP-72231       | MHM XY1026-09         | GU666506                 |
| 1441              | Quadrus cerialisDHJ03 | Pyrginae         | 08-SRNP-72232       | MHM XY1027-09         | GU666499                 |
| 1442              | Quadrus cerialisDHJ03 | Pyrginae         | 09-SRNP-80394       | MHM YG1993-10         | JF751938                 |
| 1443              | Quadrus lugubris      | Pyrginae         | 06-SRNP-55695       | MHAHH815-06           | GU155488                 |
| 1444              | Quadrus lugubris      | Pyrginae         | 06-SRNP-59481       | MHM XH880-07          | JF761090                 |
| 1445              | Quadrus lugubris      | Pyrginae         | 06-SRNP-18855       | MHAHI556-06           | GU156290                 |
| 1446              | Quadrus lugubris      | Pyrginae         | 06-SRNP-20192       | MHAHF763-06           | GU150746                 |
| 1447              | Quadrus lugubris      | Pyrginae         | 03-SRNP-3179        | CSCR407-04            | DQ293181                 |
| 1448              | Quadrus lugubris      | Pyrginae         | 06-SRNP-46983       | MHAHJ860-07           | JF753116                 |
| 1449              | Quadrus lugubris      | Pyrginae         | 06-SRNP-46868       | MHAHJ861-07           | JF753117                 |
| 1450              | Quadrus lugubris      | Pyrginae         | 06-SRNP-59203       | MHM XH877-07          | JF761091                 |
| 1451              | Quadrus lugubris      | Pyrginae         | 06-SRNP-18688       | MHAHK364-07           | JF761092                 |
| 1452              | Quadrus lugubris      | Pyrginae         | 08-SRNP-57856       | MHM XY1052-09         | HM390676                 |
| 1453              | Ouleus salvinaDHJ02   | Pyrginae         | 06-SRNP-59480       | MHM XH885-07          | JF760945                 |
| 1454              | Ouleus salvinaDHJ02   | Pyrginae         | 09-SRNP-44396       | MHM YE872-09          | GU653731                 |
| 1455              | Ouleus salvinaDHJ02   | Pyrginae         | 09-SRNP-44315       | MHM YE1566-09         | HM391126                 |

| <b>Tree Order</b> | <b>Species</b>      | <b>Subfamily</b> | <b>ACG Sampleid</b> | <b>BOLD Processid</b> | <b>Genbank Accession</b> |
|-------------------|---------------------|------------------|---------------------|-----------------------|--------------------------|
| 1456              | Ouleus salvinaDHJ02 | Pyrginae         | 09-SRNP-68013       | MHMYG2492-10          | HM885920                 |
| 1457              | Ouleus salvinaDHJ02 | Pyrginae         | 07-SRNP-41960       | MHAHL168-07           | JF762493                 |
| 1458              | Ouleus salvinaDHJ02 | Pyrginae         | 09-SRNP-67763       | MHMYE1551-09          | HM391111                 |
| 1459              | Ouleus salvinaDHJ02 | Pyrginae         | 06-SRNP-42461       | MHAHI195-06           | GU156036                 |
| 1460              | Ouleus salvinaDHJ02 | Pyrginae         | 06-SRNP-55683       | MHAHH423-06           | GU155445                 |
| 1461              | Ouleus salvinaDHJ02 | Pyrginae         | 04-SRNP-41470       | MHAHD791-05           | GU161717                 |
| 1462              | Ouleus salvinaDHJ02 | Pyrginae         | 02-SRNP-14934       | CSRII543-04           | DQ292809                 |
| 1463              | Ouleus salvinaDHJ02 | Pyrginae         | 02-SRNP-3943        | CSRII375-04           | DQ292800                 |
| 1464              | Ouleus salvinaDHJ02 | Pyrginae         | 95-SRNP-117         | CSRII538-04           | DQ292805                 |
| 1465              | Ouleus salvinaDHJ02 | Pyrginae         | 04-SRNP-41611       | MHAHD795-05           | GU161718                 |
| 1466              | Ouleus salvinaDHJ02 | Pyrginae         | 05-SRNP-55605       | MHAHF031-06           | GU150642                 |
| 1467              | Ouleus salvinaDHJ02 | Pyrginae         | 05-SRNP-55640       | MHAHF064-06           | GU150643                 |
| 1468              | Ouleus salvinaDHJ02 | Pyrginae         | 00-SRNP-20778       | MHAHH006-06           | GU155447                 |
| 1469              | Ouleus salvinaDHJ02 | Pyrginae         | 06-SRNP-55688       | MHAHH420-06           | GU155446                 |
| 1470              | Ouleus salvinaDHJ02 | Pyrginae         | 07-SRNP-312         | MHMXH886-07           | JF760944                 |
| 1471              | Ouleus salvinaDHJ02 | Pyrginae         | 07-SRNP-55498       | MHAHK311-07           | JF760946                 |
| 1472              | Ouleus salvinaDHJ02 | Pyrginae         | 07-SRNP-55500       | MHAHK313-07           | JF760947                 |
| 1473              | Ouleus salvinaDHJ02 | Pyrginae         | 07-SRNP-55682       | MHAHK316-07           | JF760948                 |
| 1474              | Ouleus salvinaDHJ02 | Pyrginae         | 07-SRNP-55748       | MHAHK318-07           | JF760949                 |
| 1475              | Ouleus salvinaDHJ02 | Pyrginae         | 07-SRNP-55742       | MHAHK323-07           | JF760950                 |
| 1476              | Ouleus salvinaDHJ02 | Pyrginae         | 07-SRNP-55810       | MHAHK325-07           | JF760951                 |
| 1477              | Ouleus salvinaDHJ02 | Pyrginae         | 07-SRNP-55828       | MHAHK326-07           | JF760952                 |
| 1478              | Ouleus salvinaDHJ02 | Pyrginae         | 07-SRNP-55829       | MHAHK327-07           | JF760953                 |
| 1479              | Ouleus salvinaDHJ02 | Pyrginae         | 09-SRNP-75766       | MHMYG2494-10          | HM885922                 |
| 1480              | Ouleus salvinaDHJ01 | Pyrginae         | 06-SRNP-59753       | MHMXH866-07           | JF760939                 |
| 1481              | Ouleus salvinaDHJ01 | Pyrginae         | 07-SRNP-56446       | MHMXX415-07           | JF762492                 |
| 1482              | Ouleus salvinaDHJ01 | Pyrginae         | 07-SRNP-55582       | MHAHK312-07           | JF760941                 |
| 1483              | Ouleus salvinaDHJ01 | Pyrginae         | 07-SRNP-55584       | MHAHK308-07           | JF760940                 |
| 1484              | Ouleus salvinaDHJ01 | Pyrginae         | 07-SRNP-55693       | MHAHK317-07           | JF760943                 |
| 1485              | Ouleus salvinaDHJ01 | Pyrginae         | 09-SRNP-65468       | MHMYE898-09           | GU653704                 |
| 1486              | Ouleus salvinaDHJ01 | Pyrginae         | 07-SRNP-42350       | MHMXP213-08           | JF762491                 |
| 1487              | Ouleus salvinaDHJ01 | Pyrginae         | 08-SRNP-70345       | MHMXX1122-09          | JF778161                 |
| 1488              | Ouleus salvinaDHJ01 | Pyrginae         | 08-SRNP-70346       | MHMXX1123-09          | JF778162                 |
| 1489              | Ouleus salvinaDHJ01 | Pyrginae         | 09-SRNP-70105       | MHMYE897-09           | GU653707                 |
| 1490              | Ouleus salvinaDHJ01 | Pyrginae         | 09-SRNP-68071       | MHMYG2490-10          | HM885917                 |
| 1491              | Ouleus salvinaDHJ01 | Pyrginae         | 06-SRNP-31160       | MHAHG785-06           | GU151511                 |
| 1492              | Ouleus salvinaDHJ01 | Pyrginae         | 06-SRNP-55656       | MHAHH419-06           | GU155443                 |
| 1493              | Ouleus salvinaDHJ01 | Pyrginae         | 06-SRNP-55943       | MHAHH421-06           | GU155444                 |
| 1494              | Ouleus salvinaDHJ01 | Pyrginae         | 06-SRNP-55655       | MHAHH422-06           | GU155442                 |
| 1495              | Ouleus salvinaDHJ01 | Pyrginae         | 09-SRNP-68307       | MHMYG2491-10          | HM885919                 |
| 1496              | Ouleus salvinaDHJ01 | Pyrginae         | 08-SRNP-55837       | MHMXX1126-09          | JF778165                 |
| 1497              | Ouleus salvinaDHJ01 | Pyrginae         | 08-SRNP-55820       | MHMXX1125-09          | JF778164                 |
| 1498              | Ouleus salvinaDHJ01 | Pyrginae         | 05-SRNP-21647       | MHAHF078-06           | GU150640                 |
| 1499              | Ouleus salvinaDHJ01 | Pyrginae         | 05-SRNP-55686       | MHAHF073-06           | GU150638                 |
| 1500              | Ouleus salvinaDHJ01 | Pyrginae         | 09-SRNP-67934       | MHMYG2489-10          | HM885916                 |
| 1501              | Ouleus salvinaDHJ01 | Pyrginae         | 07-SRNP-55569       | MHAHK314-07           | JF760942                 |
| 1502              | Ouleus salvinaDHJ01 | Pyrginae         | 02-SRNP-14802       | CSRII541-04           | DQ292807                 |
| 1503              | Ouleus salvinaDHJ01 | Pyrginae         | 09-SRNP-75801       | MHMYG2493-10          | HM885921                 |
| 1504              | Ouleus salvinaDHJ01 | Pyrginae         | 07-SRNP-41975       | MHAHL167-07           | JF762488                 |
| 1505              | Ouleus salvinaDHJ01 | Pyrginae         | 06-SRNP-6666        | MHAHJ461-07           | JF752946                 |
| 1506              | Ouleus salvinaDHJ01 | Pyrginae         | 06-SRNP-42460       | MHAHI194-06           | GU156035                 |
| 1507              | Ouleus salvinaDHJ01 | Pyrginae         | 05-SRNP-55394       | MHAHF080-06           | GU150641                 |
| 1508              | Ouleus salvinaDHJ01 | Pyrginae         | 05-SRNP-55393       | MHAHF063-06           | GU150639                 |
| 1509              | Ouleus salvinaDHJ01 | Pyrginae         | 05-SRNP-55399       | MHAHD794-05           | GU161716                 |
| 1510              | Ouleus salvinaDHJ01 | Pyrginae         | 04-SRNP-41462       | MHAHD789-05           | GU161715                 |
| 1511              | Ouleus salvinaDHJ01 | Pyrginae         | 04-SRNP-41847       | MHAHD263-05           | GU161714                 |

| Tree Order | Species             | Subfamily | ACG Sampleid  | BOLD Processid | Genbank Accession |
|------------|---------------------|-----------|---------------|----------------|-------------------|
| 1512       | Ouleus salvinaDHJ01 | Pyrginae  | 04-SRNP-31499 | CSRII422-04    | DQ292803          |
| 1513       | Ouleus salvinaDHJ01 | Pyrginae  | 02-SRNP-14703 | CSRII382-04    | DQ292801          |
| 1514       | Ouleus salvinaDHJ01 | Pyrginae  | 02-SRNP-14705 | CSRII383-04    | DQ292802          |
| 1515       | Ouleus salvinaDHJ01 | Pyrginae  | 02-SRNP-4232  | CSRII540-04    | DQ292806          |
| 1516       | Ouleus salvinaDHJ01 | Pyrginae  | 02-SRNP-14805 | CSRII542-04    | DQ292808          |
| 1517       | Ouleus salvinaDHJ01 | Pyrginae  | 03-SRNP-34140 | CSRII537-04    | DQ292804          |
| 1518       | Ouleus salvinaDHJ01 | Pyrginae  | 06-SRNP-31161 | MHAHG774-06    | GU151510          |
| 1519       | Ouleus salvinaDHJ01 | Pyrginae  | 07-SRNP-21111 | MHAHL149-07    | JF762486          |
| 1520       | Ouleus salvinaDHJ01 | Pyrginae  | 07-SRNP-21258 | MHAHL151-07    | JF762487          |
| 1521       | Ouleus salvinaDHJ01 | Pyrginae  | 07-SRNP-65146 | MHAHL175-07    | JF762489          |
| 1522       | Ouleus salvinaDHJ01 | Pyrginae  | 07-SRNP-65555 | MHMXR054-08    | JF762490          |
| 1523       | Ouleus salvinaDHJ01 | Pyrginae  | 08-SRNP-65516 | MHMXX1124-09   | JF778163          |
| 1524       | Ouleus salvinaDHJ01 | Pyrginae  | 08-SRNP-2541  | MHMXX1187-09   | JF778166          |
| 1525       | Ouleus salvinaDHJ01 | Pyrginae  | 09-SRNP-20454 | MHMYG2496-10   | HM885924          |
| 1526       | Ouleus salvinaDHJ01 | Pyrginae  | 09-SRNP-80738 | MHMYG2009-10   | JF751936          |
| 1527       | Eracon lachesis     | Pyrginae  | 05-SRNP-32007 | MHAHF267-06    | GU150441          |
| 1528       | Eracon lachesis     | Pyrginae  | 05-SRNP-47074 | MHAHE654-06    | GU149655          |
| 1529       | Eracon lachesis     | Pyrginae  | 05-SRNP-33238 | MHAHI647-06    | GU155964          |
| 1530       | Eracon lachesis     | Pyrginae  | 08-SRNP-40919 | MHMXX907-09    | JF777922          |
| 1531       | Eracon lachesis     | Pyrginae  | 07-SRNP-32478 | MHMXP124-08    | JF762242          |
| 1532       | Eracon lachesis     | Pyrginae  | 04-SRNP-56232 | MHAHE294-05    | GU149664          |
| 1533       | Eracon lachesis     | Pyrginae  | 06-SRNP-65850 | MHMXXK035-07   | JF762244          |
| 1534       | Eracon lachesis     | Pyrginae  | 07-SRNP-45762 | MHMXP123-08    | JF762243          |
| 1535       | Eracon lachesis     | Pyrginae  | 09-SRNP-55623 | MHMYE1498-09   | GU653506          |
| 1536       | Eracon lachesis     | Pyrginae  | 09-SRNP-31097 | MHMYC546-09    | GU649799          |
| 1537       | Eracon lachesis     | Pyrginae  | 08-SRNP-40965 | MHMXX910-09    | JF777925          |
| 1538       | Eracon lachesis     | Pyrginae  | 08-SRNP-31173 | MHMXX909-09    | JF777924          |
| 1539       | Eracon lachesis     | Pyrginae  | 08-SRNP-40962 | MHMXX908-09    | JF777923          |
| 1540       | Eracon lachesis     | Pyrginae  | 07-SRNP-45763 | MHMXR896-08    | JF762241          |
| 1541       | Eracon lachesis     | Pyrginae  | 07-SRNP-32129 | MHAHL247-07    | JF762239          |
| 1542       | Eracon lachesis     | Pyrginae  | 06-SRNP-31728 | MHAHH462-06    | GU155402          |
| 1543       | Eracon lachesis     | Pyrginae  | 05-SRNP-31900 | MHAHF268-06    | GU150440          |
| 1544       | Eracon lachesis     | Pyrginae  | 05-SRNP-31902 | MHAHF266-06    | GU150439          |
| 1545       | Eracon lachesis     | Pyrginae  | 05-SRNP-47073 | MHAHE653-06    | GU149656          |
| 1546       | Eracon lachesis     | Pyrginae  | 05-SRNP-47071 | MHAHE652-06    | GU149657          |
| 1547       | Eracon lachesis     | Pyrginae  | 05-SRNP-47487 | MHAHE651-06    | GU149658          |
| 1548       | Eracon lachesis     | Pyrginae  | 05-SRNP-3998  | MHAHE650-06    | GU149659          |
| 1549       | Eracon lachesis     | Pyrginae  | 05-SRNP-4680  | MHAHE649-06    | GU149660          |
| 1550       | Eracon lachesis     | Pyrginae  | 05-SRNP-3997  | MHAHE648-06    | GU149661          |
| 1551       | Eracon lachesis     | Pyrginae  | 04-SRNP-55974 | MHAHE295-05    | GU149662          |
| 1552       | Eracon lachesis     | Pyrginae  | 04-SRNP-31099 | MHAHE293-05    | GU149663          |
| 1553       | Eracon lachesis     | Pyrginae  | 05-SRNP-70315 | MHAHG108-06    | GU151404          |
| 1554       | Eracon lachesis     | Pyrginae  | 01-SRNP-1331  | CSCR106-04     | DQ292502          |
| 1555       | Eracon lachesis     | Pyrginae  | 07-SRNP-46421 | MHMXT162-08    | JF762240          |
| 1556       | Eracon lachesis     | Pyrginae  | 09-SRNP-57098 | MHMYG2435-10   | HM885859          |
| 1557       | Eracon lachesis     | Pyrginae  | 09-SRNP-58020 | MHMYG2436-10   | HM885860          |
| 1558       | Eracon lachesis     | Pyrginae  | 09-SRNP-41521 | MHMYG2437-10   | HM885861          |
| 1559       | Tosta niger         | Pyrginae  | 00-SRNP-9034  | CSRII359-04    | DQ293610          |
| 1560       | Tosta niger         | Pyrginae  | 00-SRNP-9020  | CSRII358-04    | DQ293609          |
| 1561       | Tosta niger         | Pyrginae  | 04-SRNP-35560 | MHAHD873-05    | GU161899          |
| 1562       | Tosta niger         | Pyrginae  | 08-SRNP-36395 | MHMXX586-09    | JF778554          |
| 1563       | Tosta niger         | Pyrginae  | 08-SRNP-37594 | MHMYC527-09    | GU649812          |
| 1564       | Tosta platypterus   | Pyrginae  | 01-SRNP-25099 | CSRII372-04    | DQ293612          |
| 1565       | Tosta platypterus   | Pyrginae  | 04-SRNP-60213 | MHAHE323-05    | GU150127          |
| 1566       | Tosta platypterus   | Pyrginae  | 04-SRNP-4462  | MHAHE324-05    | GU150130          |
| 1567       | Tosta platypterus   | Pyrginae  | 06-SRNP-6600  | MHAHJ462-07    | JF753194          |

| <b>Tree Order</b> | <b>Species</b>     | <b>Subfamily</b> | <b>ACG Sampleid</b> | <b>BOLD Processid</b> | <b>Genbank Accession</b> |
|-------------------|--------------------|------------------|---------------------|-----------------------|--------------------------|
| 1568              | Tosta platypterus  | Pyrginae         | 06-SRNP-2124        | MHAHG743-06           | GU151746                 |
| 1569              | Tosta platypterus  | Pyrginae         | 04-SRNP-4497        | MHAHE326-05           | GU150128                 |
| 1570              | Tosta platypterus  | Pyrginae         | 04-SRNP-42429       | MHAHE325-05           | GU150125                 |
| 1571              | Tosta platypterus  | Pyrginae         | 04-SRNP-43095       | MHAHE322-05           | GU150129                 |
| 1572              | Tosta platypterus  | Pyrginae         | 04-SRNP-815         | MHAHE123-05           | GU150126                 |
| 1573              | Tosta platypterus  | Pyrginae         | 01-SRNP-3610        | CSRII363-04           | DQ293611                 |
| 1574              | Tosta platypterus  | Pyrginae         | 07-SRNP-315         | MHMXXK060-07          | JF763271                 |
| 1575              | Tosta platypterus  | Pyrginae         | 07-SRNP-41224       | MHAHL237-07           | JF763265                 |
| 1576              | Tosta platypterus  | Pyrginae         | 07-SRNP-2877        | MHAHL238-07           | JF763266                 |
| 1577              | Tosta platypterus  | Pyrginae         | 08-SRNP-584         | MHMXX1062-09          | JF778556                 |
| 1578              | Tosta platypterus  | Pyrginae         | 09-SRNP-67348       | MHMYE1525-09          | HM391085                 |
| 1579              | Tosta platypterus  | Pyrginae         | 04-SRNP-55109       | MHAHD809-05           | GU161901                 |
| 1580              | Tosta platypterus  | Pyrginae         | 04-SRNP-55252       | MHAHD808-05           | GU161900                 |
| 1581              | Tosta platypterus  | Pyrginae         | 07-SRNP-41435       | MHAHL236-07           | JF763264                 |
| 1582              | Tosta platypterus  | Pyrginae         | 07-SRNP-3108        | MHMXP171-08           | JF763270                 |
| 1583              | Tosta platypterus  | Pyrginae         | 07-SRNP-45523       | MHMXR766-08           | JF763269                 |
| 1584              | Tosta platypterus  | Pyrginae         | 07-SRNP-46134       | MHMXR778-08           | JF763268                 |
| 1585              | Tosta platypterus  | Pyrginae         | 07-SRNP-45525       | MHMXR779-08           | JF763267                 |
| 1586              | Tosta platypterus  | Pyrginae         | 08-SRNP-70842       | MHMXX1061-09          | JF778555                 |
| 1587              | Tosta platypterus  | Pyrginae         | 09-SRNP-72364       | MHMYE1526-09          | HM391086                 |
| 1588              | Tosta platypterus  | Pyrginae         | 09-SRNP-72095       | MHMYE1527-09          | HM391087                 |
| 1589              | Iliana Burns01     | Pyrginae         | 07-SRNP-32919       | MHAHL226-07           | JF762295                 |
| 1590              | Iliana Burns01     | Pyrginae         | 07-SRNP-32830       | MHMXP122-08           | JF762296                 |
| 1591              | Tosta gorgus       | Pyrginae         | 05-SRNP-64260       | MHAHG776-06           | GU151745                 |
| 1592              | Tosta gorgus       | Pyrginae         | 05-SRNP-25010       | MHAHF651-06           | GU150939                 |
| 1593              | Tosta gorgus       | Pyrginae         | 05-SRNP-25011       | MHAHF650-06           | GU150938                 |
| 1594              | Tosta gorgus       | Pyrginae         | 04-SRNP-14209       | MHAHD797-05           | GU161897                 |
| 1595              | Tosta gorgus       | Pyrginae         | 04-SRNP-16178       | MHAHD796-05           | GU161898                 |
| 1596              | Tosta gorgus       | Pyrginae         | 00-SRNP-2772        | CSCR593-04            | DQ293608                 |
| 1597              | Tosta gorgus       | Pyrginae         | 00-SRNP-2404        | CSCR592-04            | DQ293607                 |
| 1598              | Tosta gorgus       | Pyrginae         | 08-SRNP-22908       | MHMXX601-09           | JF778553                 |
| 1599              | Cyclosemia Burns01 | Pyrginae         | 02-SRNP-21532       | CSCR083-04            | DQ292232                 |
| 1600              | Cyclosemia Burns01 | Pyrginae         | 02-SRNP-21274       | CSCR082-04            | DQ292231                 |
| 1601              | Cyclosemia Burns01 | Pyrginae         | 08-SRNP-70951       | MHMXXW528-09          | JF753847                 |
| 1602              | Cyclosemia Burns01 | Pyrginae         | 08-SRNP-40739       | MHMXXW529-09          | JF753848                 |
| 1603              | Cyclosemia Burns01 | Pyrginae         | 07-SRNP-41474       | MHAHL244-07           | JF762014                 |
| 1604              | Cyclosemia Burns01 | Pyrginae         | 07-SRNP-32839       | MHMXR895-08           | JF762015                 |
| 1605              | Cyclosemia Burns01 | Pyrginae         | 07-SRNP-41339       | MHAHL243-07           | JF762013                 |
| 1606              | Cyclosemia Burns01 | Pyrginae         | 06-SRNP-41379       | MHAHH428-06           | GU155341                 |
| 1607              | Cyclosemia Burns01 | Pyrginae         | 05-SRNP-33219       | MHAHF817-06           | GU150371                 |
| 1608              | Cyclosemia Burns01 | Pyrginae         | 05-SRNP-32358       | MHAHF782-06           | GU150369                 |
| 1609              | Cyclosemia Burns01 | Pyrginae         | 05-SRNP-41022       | MHAHF183-06           | GU150366                 |
| 1610              | Cyclosemia Burns01 | Pyrginae         | 04-SRNP-56318       | MHAHF181-06           | GU150367                 |
| 1611              | Cyclosemia Burns01 | Pyrginae         | 05-SRNP-3974        | MHAHF178-06           | GU150368                 |
| 1612              | Cyclosemia Burns01 | Pyrginae         | 05-SRNP-41706       | MHAHF176-06           | GU150370                 |
| 1613              | Cyclosemia Burns01 | Pyrginae         | 04-SRNP-42740       | MHAHD896-05           | GU161400                 |
| 1614              | Cyclosemia Burns01 | Pyrginae         | 07-SRNP-21340       | MHMXXK432-07          | JF762017                 |
| 1615              | Cyclosemia Burns01 | Pyrginae         | 07-SRNP-21976       | MHAHL242-07           | JF762012                 |
| 1616              | Cyclosemia Burns01 | Pyrginae         | 06-SRNP-30843       | MHAHG786-06           | GU151338                 |
| 1617              | Cyclosemia Burns01 | Pyrginae         | 07-SRNP-65003       | MHAHL241-07           | JF762011                 |
| 1618              | Cyclosemia Burns01 | Pyrginae         | 04-SRNP-42705       | MHAHD895-05           | GU161401                 |
| 1619              | Cyclosemia Burns01 | Pyrginae         | 04-SRNP-42378       | MHAHD894-05           | GU161402                 |
| 1620              | Cyclosemia Burns01 | Pyrginae         | 04-SRNP-41976       | MHAHD893-05           | GU161395                 |
| 1621              | Cyclosemia Burns01 | Pyrginae         | 04-SRNP-42926       | MHAHD890-05           | GU161399                 |
| 1622              | Cyclosemia Burns01 | Pyrginae         | 04-SRNP-55128       | MHAHD889-05           | GU161394                 |
| 1623              | Cyclosemia Burns01 | Pyrginae         | 04-SRNP-30480       | MHAHD888-05           | GU161396                 |

| <b>Tree Order</b> | <b>Species</b>         | <b>Subfamily</b> | <b>ACG Sampleid</b> | <b>BOLD Processid</b> | <b>Genbank Accession</b> |
|-------------------|------------------------|------------------|---------------------|-----------------------|--------------------------|
| 1624              | Cyclosemia Burns01     | Pyrginae         | 04-SRNP-43086       | MHAHD891-05           | GU161397                 |
| 1625              | Cyclosemia Burns01     | Pyrginae         | 04-SRNP-42679       | MHAHD892-05           | GU161398                 |
| 1626              | Cyclosemia Burns01     | Pyrginae         | 07-SRNP-3363        | MHMXP188-08           | JF762016                 |
| 1627              | Cyclosemia Burns01     | Pyrginae         | 08-SRNP-70207       | MHMXW532-09           | JF753850                 |
| 1628              | Cyclosemia Burns01     | Pyrginae         | 08-SRNP-70211       | MHMXW531-09           | JF753849                 |
| 1629              | Cyclosemia Burns01     | Pyrginae         | 08-SRNP-40741       | MHMXW533-09           | JF753851                 |
| 1630              | Cyclosemia Burns01     | Pyrginae         | 08-SRNP-72009       | MHMXW535-09           | JF777825                 |
| 1631              | Cyclosemia Burns01     | Pyrginae         | 09-SRNP-70459       | MHMYE1500-09          | GU653504                 |
| 1632              | Cyclosemia Burns01     | Pyrginae         | 09-SRNP-67109       | MHMYE1501-09          | GU653501                 |
| 1633              | Cyclosemia Burns01     | Pyrginae         | 09-SRNP-73946       | MHMYG2433-10          | HM885857                 |
| 1634              | Cyclosemia anastomosis | Pyrginae         | 04-SRNP-48002       | MHAHE081-05           | GU149575                 |
| 1635              | Cyclosemia anastomosis | Pyrginae         | 01-SRNP-464         | CSCR503-04            | DQ292230                 |
| 1636              | Cyclosemia anastomosis | Pyrginae         | 01-SRNP-2931        | CSCR502-04            | DQ292229                 |
| 1637              | Cyclosemia anastomosis | Pyrginae         | 05-SRNP-41199       | MHAHF182-06           | GU150361                 |
| 1638              | Cyclosemia anastomosis | Pyrginae         | 08-SRNP-70103       | MHMXW530-09           | JF753846                 |
| 1639              | Cyclosemia anastomosis | Pyrginae         | 08-SRNP-71654       | MHMXW527-09           | JF753845                 |
| 1640              | Cyclosemia anastomosis | Pyrginae         | 07-SRNP-42171       | MHMXP186-08           | JF762007                 |
| 1641              | Cyclosemia anastomosis | Pyrginae         | 07-SRNP-30971       | MHMXH861-07           | JF760639                 |
| 1642              | Cyclosemia anastomosis | Pyrginae         | 05-SRNP-43097       | MHAHF784-06           | GU150360                 |
| 1643              | Cyclosemia anastomosis | Pyrginae         | 05-SRNP-34289       | MHAHF767-06           | GU150365                 |
| 1644              | Cyclosemia anastomosis | Pyrginae         | 05-SRNP-41292       | MHAHF185-06           | GU150363                 |
| 1645              | Cyclosemia anastomosis | Pyrginae         | 05-SRNP-41296       | MHAHF177-06           | GU150362                 |
| 1646              | Cyclosemia anastomosis | Pyrginae         | 05-SRNP-45117       | MHAHF175-06           | GU150359                 |
| 1647              | Cyclosemia anastomosis | Pyrginae         | 04-SRNP-40770       | MHAHE082-05           | GU149574                 |
| 1648              | Cyclosemia anastomosis | Pyrginae         | 05-SRNP-34539       | MHAHF759-06           | GU150364                 |
| 1649              | Cyclosemia anastomosis | Pyrginae         | 07-SRNP-45516       | MHMXP187-08           | JF762006                 |
| 1650              | Cyclosemia anastomosis | Pyrginae         | 07-SRNP-45515       | MHMXP183-08           | JF762010                 |
| 1651              | Cyclosemia anastomosis | Pyrginae         | 07-SRNP-45573       | MHMXP184-08           | JF762009                 |
| 1652              | Cyclosemia anastomosis | Pyrginae         | 06-SRNP-43745       | MHAHJ487-07           | JF752586                 |
| 1653              | Cyclosemia anastomosis | Pyrginae         | 06-SRNP-42938       | MHAHI536-06           | GU155900                 |
| 1654              | Cyclosemia anastomosis | Pyrginae         | 06-SRNP-33946       | MHAHI568-06           | GU155901                 |
| 1655              | Cyclosemia anastomosis | Pyrginae         | 07-SRNP-2044        | MHAHL239-07           | JF762004                 |
| 1656              | Cyclosemia anastomosis | Pyrginae         | 07-SRNP-45517       | MHMXP185-08           | JF762008                 |
| 1657              | Cyclosemia anastomosis | Pyrginae         | 07-SRNP-46695       | MHMXT163-08           | JF762005                 |
| 1658              | Cyclosemia anastomosis | Pyrginae         | 08-SRNP-72776       | MHMXY1047-09          | GU666490                 |
| 1659              | Cyclosemia anastomosis | Pyrginae         | 05-SRNP-43883       | MHAHG787-06           | GU151337                 |
| 1660              | Cyclosemia anastomosis | Pyrginae         | 09-SRNP-33098       | MHMYG2434-10          | HM885858                 |
| 1661              | Cyclosemia subcaerulea | Pyrginae         | 06-SRNP-42573       | MHAHI573-06           | GU155903                 |
| 1662              | Cyclosemia subcaerulea | Pyrginae         | 02-SRNP-6718        | CSCR084-04            | DQ292233                 |
| 1663              | Cyclosemia subcaerulea | Pyrginae         | 02-SRNP-7780        | CSCR085-04            | DQ292234                 |
| 1664              | Cyclosemia subcaerulea | Pyrginae         | 06-SRNP-42489       | MHAHI569-06           | GU155902                 |
| 1665              | Cyclosemia subcaerulea | Pyrginae         | 07-SRNP-65063       | MHAHL245-07           | JF762018                 |
| 1666              | Cyclosemia subcaerulea | Pyrginae         | 09-SRNP-69386       | MHMYE1499-09          | GU653503                 |
| 1667              | Pellicia Janzen01      | Pyrginae         | 05-SRNP-34546       | MHAHF721-06           | GU150676                 |
| 1668              | Pellicia Janzen01      | Pyrginae         | 08-SRNP-2348        | MHMXS084-08           | JF762546                 |
| 1669              | Pellicia dimidiata     | Pyrginae         | 06-SRNP-30813       | MHAHG241-06           | GU151544                 |
| 1670              | Pellicia dimidiata     | Pyrginae         | 93-SRNP-6528        | CSCR179-04            | DQ292840                 |
| 1671              | Pellicia dimidiata     | Pyrginae         | 06-SRNP-4815        | MHAHI186-06           | GU156074                 |
| 1672              | Pellicia dimidiata     | Pyrginae         | 06-SRNP-3027        | MHAHG780-06           | GU151540                 |
| 1673              | Pellicia dimidiata     | Pyrginae         | 06-SRNP-1886        | MHAHG779-06           | GU151541                 |
| 1674              | Pellicia dimidiata     | Pyrginae         | 06-SRNP-2646        | MHAHG778-06           | GU151542                 |
| 1675              | Pellicia dimidiata     | Pyrginae         | 06-SRNP-2668        | MHAHG777-06           | GU151543                 |
| 1676              | Pellicia dimidiata     | Pyrginae         | 05-SRNP-42242       | MHAHF103-06           | GU150675                 |
| 1677              | Pellicia dimidiata     | Pyrginae         | 04-SRNP-46357       | MHAHD806-05           | GU161781                 |
| 1678              | Pellicia dimidiata     | Pyrginae         | 02-SRNP-4585        | MHAHG923-06           | GU151545                 |
| 1679              | Pellicia dimidiata     | Pyrginae         | 93-SRNP-8674        | CSCR180-04            | DQ292841                 |

| <b>Tree Order</b> | <b>Species</b>           | <b>Subfamily</b> | <b>ACG Sampleid</b> | <b>BOLD Processid</b> | <b>Genbank Accession</b> |
|-------------------|--------------------------|------------------|---------------------|-----------------------|--------------------------|
| 1680              | Pellicia dimidiata       | Pyrginae         | 07-SRNP-45157       | MHAHK315-07           | JF760999                 |
| 1681              | Pellicia dimidiata       | Pyrginae         | 07-SRNP-1514        | MHAHK324-07           | JF761000                 |
| 1682              | Pellicia dimidiata       | Pyrginae         | 07-SRNP-2217        | MHAHL152-07           | JF762545                 |
| 1683              | Pellicia dimidiata       | Pyrginae         | 08-SRNP-2140        | MHMXX1101-09          | JF778310                 |
| 1684              | Pellicia arina           | Pyrginae         | 04-SRNP-13705       | MHAHD802-05           | GU161779                 |
| 1685              | Pellicia arina           | Pyrginae         | 03-SRNP-12773.1     | MHAHI239-06           | GU156072                 |
| 1686              | Pellicia arina           | Pyrginae         | 00-SRNP-4592        | MHAHI240-06           | GU156073                 |
| 1687              | Pellicia arina           | Pyrginae         | 02-SRNP-32880       | MHAHI241-06           | GU156071                 |
| 1688              | Pellicia arina           | Pyrginae         | 04-SRNP-15702       | MHAHD803-05           | GU161780                 |
| 1689              | Pellicia arina           | Pyrginae         | 94-SRNP-139         | CSCR177-04            | DQ292839                 |
| 1690              | Pellicia arina           | Pyrginae         | 05-SRNP-65245       | MHAHF652-06           | GU150672                 |
| 1691              | Pellicia arina           | Pyrginae         | 05-SRNP-61204       | MHAHF678-06           | GU150674                 |
| 1692              | Pellicia arina           | Pyrginae         | 05-SRNP-62646       | MHAHF679-06           | GU150673                 |
| 1693              | Pellicia arina           | Pyrginae         | 06-SRNP-57936       | MHAHJ830-07           | JF752978                 |
| 1694              | Pellicia arina           | Pyrginae         | 06-SRNP-19742       | MHAHK321-07           | JF760998                 |
| 1695              | Pellicia arina           | Pyrginae         | 07-SRNP-14674       | MHMXX716-09           | JF778309                 |
| 1696              | Mictris crispus caerulea | Pyrginae         | 03-SRNP-18922       | CSCR546-04            | DQ292614                 |
| 1697              | Mictris crispus caerulea | Pyrginae         | 05-SRNP-4397        | MHAHF854-06           | GU150529                 |
| 1698              | Mictris crispus caerulea | Pyrginae         | 05-SRNP-4032        | MHAHF856-06           | GU150528                 |
| 1699              | Mictris crispus caerulea | Pyrginae         | 05-SRNP-3008        | MHAHF855-06           | GU150530                 |
| 1700              | Mictris crispus caerulea | Pyrginae         | 05-SRNP-34281       | MHAHF713-06           | GU150531                 |
| 1701              | Mictris crispus caerulea | Pyrginae         | 07-SRNP-3356        | MHMXP176-08           | JF762337                 |
| 1702              | Mictris crispus caerulea | Pyrginae         | 08-SRNP-40396       | MHMXT164-08           | JF762333                 |
| 1703              | Mictris crispus caerulea | Pyrginae         | 09-SRNP-71308       | MHMYE1496-09          | GU653508                 |
| 1704              | Mictris crispus caerulea | Pyrginae         | 07-SRNP-33227       | MHMXR780-08           | JF762336                 |
| 1705              | Mictris crispus caerulea | Pyrginae         | 07-SRNP-32363       | MHAHL230-07           | JF762332                 |
| 1706              | Mictris crispus caerulea | Pyrginae         | 07-SRNP-31656       | MHMXXK036-07          | JF762338                 |
| 1707              | Mictris crispus caerulea | Pyrginae         | 07-SRNP-31094       | MHMXH859-07           | JF760839                 |
| 1708              | Mictris crispus caerulea | Pyrginae         | 05-SRNP-34280       | MHAHG257-06           | GU151456                 |
| 1709              | Mictris crispus caerulea | Pyrginae         | 05-SRNP-2161        | MHAHF857-06           | GU150527                 |
| 1710              | Mictris crispus caerulea | Pyrginae         | 04-SRNP-4244        | MHAHD872-05           | GU161590                 |
| 1711              | Mictris crispus caerulea | Pyrginae         | 03-SRNP-6065        | CSCR547-04            | DQ292615                 |
| 1712              | Mictris crispus caerulea | Pyrginae         | 03-SRNP-9772        | CSCR385-04            | DQ292613                 |
| 1713              | Mictris crispus caerulea | Pyrginae         | 05-SRNP-34282       | MHAHG256-06           | GU151457                 |
| 1714              | Mictris crispus caerulea | Pyrginae         | 05-SRNP-34208       | MHAHF720-06           | GU150526                 |
| 1715              | Mictris crispus caerulea | Pyrginae         | 08-SRNP-195         | MHMXT150-08           | JF762335                 |
| 1716              | Mictris crispus caerulea | Pyrginae         | 08-SRNP-196         | MHMXT151-08           | JF762334                 |
| 1717              | Mictris crispus caerulea | Pyrginae         | 08-SRNP-31176       | MHMXX905-09           | JF778083                 |
| 1718              | Mictris crispus caerulea | Pyrginae         | 08-SRNP-2184        | MHMXX906-09           | JF778084                 |
| 1719              | Mictris crispus caerulea | Pyrginae         | 09-SRNP-71399       | MHMYE1497-09          | GU653505                 |
| 1720              | Pachyneuria liscica      | Pyrginae         | 05-SRNP-58420       | MHAHF098-06           | GU150647                 |
| 1721              | Pachyneuria liscica      | Pyrginae         | 03-SRNP-30838       | MHAHI321-06           | GU156038                 |
| 1722              | Pachyneuria liscica      | Pyrginae         | 07-SRNP-57201       | MHAHL166-07           | JF762504                 |
| 1723              | Pachyneuria liscica      | Pyrginae         | 03-SRNP-27023       | MHAHI323-06           | GU156040                 |
| 1724              | Pachyneuria liscica      | Pyrginae         | 03-SRNP-27271       | MHAHI330-06           | GU156046                 |
| 1725              | Pachyneuria liscica      | Pyrginae         | 03-SRNP-27670       | MHAHI329-06           | GU156045                 |
| 1726              | Pachyneuria liscica      | Pyrginae         | 03-SRNP-30847       | MHAHI328-06           | GU156044                 |
| 1727              | Pachyneuria liscica      | Pyrginae         | 03-SRNP-27200       | MHAHI326-06           | GU156042                 |
| 1728              | Pachyneuria liscica      | Pyrginae         | 03-SRNP-27033       | MHAHI325-06           | GU156041                 |
| 1729              | Pachyneuria liscica      | Pyrginae         | 03-SRNP-27671       | MHAHI324-06           | GU156037                 |
| 1730              | Pachyneuria liscica      | Pyrginae         | 03-SRNP-27754       | MHAHI322-06           | GU156039                 |
| 1731              | Pachyneuria liscica      | Pyrginae         | 03-SRNP-27025       | MHAHI327-06           | GU156043                 |
| 1732              | Pachyneuria liscica      | Pyrginae         | 97-SRNP-5856        | CSCR174-04            | DQ292823                 |
| 1733              | Pachyneuria liscica      | Pyrginae         | 02-SRNP-5984        | CSCR559-04            | DQ292824                 |
| 1734              | Pachyneuria liscica      | Pyrginae         | 06-SRNP-58286       | MHAHJ463-07           | JF752959                 |
| 1735              | Pachyneuria liscica      | Pyrginae         | 06-SRNP-58263       | MHAHJ692-07           | JF752960                 |

| <b>Tree Order</b> | <b>Species</b>      | <b>Subfamily</b> | <b>ACG Sampleid</b> | <b>BOLD Processid</b> | <b>Genbank Accession</b> |
|-------------------|---------------------|------------------|---------------------|-----------------------|--------------------------|
| 1736              | Pachyneuria licisca | Pyrginae         | 06-SRNP-67766       | MHAHK320-07           | JF760955                 |
| 1737              | Pachyneuria licisca | Pyrginae         | 09-SRNP-57271       | MHMYE1530-09          | HM391090                 |
| 1738              | Pachyneuria licisca | Pyrginae         | 09-SRNP-57272       | MHMYE1531-09          | HM391091                 |
| 1739              | Pachyneuria licisca | Pyrginae         | 09-SRNP-57273       | MHMYG2476-10          | HM885903                 |
| 1740              | Nisoniades castolus | Pyrginae         | 05-SRNP-6591        | MHAHF800-06           | GU150623                 |
| 1741              | Nisoniades castolus | Pyrginae         | 06-SRNP-32805       | MHAHI091-06           | GU156021                 |
| 1742              | Nisoniades castolus | Pyrginae         | 05-SRNP-45293       | MHAHF068-06           | GU150619                 |
| 1743              | Nisoniades castolus | Pyrginae         | 05-SRNP-31414       | MHAHF079-06           | GU150622                 |
| 1744              | Nisoniades castolus | Pyrginae         | 05-SRNP-1751        | MHAHF067-06           | GU150620                 |
| 1745              | Nisoniades castolus | Pyrginae         | 07-SRNP-41530       | MHAHL155-07           | JF762446                 |
| 1746              | Nisoniades castolus | Pyrginae         | 05-SRNP-31711       | MHAHF028-06           | GU150618                 |
| 1747              | Nisoniades castolus | Pyrginae         | 04-SRNP-41670       | MHAHD786-05           | GU161697                 |
| 1748              | Nisoniades castolus | Pyrginae         | 04-SRNP-34843       | MHAHD785-05           | GU161696                 |
| 1749              | Nisoniades castolus | Pyrginae         | 04-SRNP-56347       | MHAHD783-05           | GU161693                 |
| 1750              | Nisoniades castolus | Pyrginae         | 04-SRNP-60852       | MHAHD782-05           | GU161695                 |
| 1751              | Nisoniades castolus | Pyrginae         | 05-SRNP-2312        | MHAHF070-06           | GU150617                 |
| 1752              | Nisoniades castolus | Pyrginae         | 04-SRNP-55872       | MHAHD784-05           | GU161694                 |
| 1753              | Nisoniades castolus | Pyrginae         | 05-SRNP-41450       | MHAHF076-06           | GU150621                 |
| 1754              | Nisoniades castolus | Pyrginae         | 05-SRNP-41083       | MHAHF072-06           | GU150616                 |
| 1755              | Nisoniades castolus | Pyrginae         | 06-SRNP-32630       | MHAHI190-06           | GU156020                 |
| 1756              | Nisoniades castolus | Pyrginae         | 07-SRNP-65198       | MHAHL174-07           | JF762447                 |
| 1757              | Nisoniades castolus | Pyrginae         | 07-SRNP-65620       | MHMXR049-08           | JF762448                 |
| 1758              | Nisoniades castolus | Pyrginae         | 08-SRNP-2616        | MHMXX1071-09          | JF778137                 |
| 1759              | Nisoniades castolus | Pyrginae         | 08-SRNP-70988       | MHMXX1072-09          | JF778138                 |
| 1760              | Nisoniades castolus | Pyrginae         | 08-SRNP-70583       | MHMXX1073-09          | JF778139                 |
| 1761              | Nisoniades castolus | Pyrginae         | 08-SRNP-65475       | MHMXX1074-09          | JF778140                 |
| 1762              | Nisoniades castolus | Pyrginae         | 08-SRNP-65509       | MHMXX1075-09          | JF778141                 |
| 1763              | Nisoniades castolus | Pyrginae         | 08-SRNP-70402       | MHMXX1076-09          | JF778142                 |
| 1764              | Nisoniades castolus | Pyrginae         | 08-SRNP-2617        | MHMXX1077-09          | JF778143                 |
| 1765              | Nisoniades castolus | Pyrginae         | 09-SRNP-71609       | MHMYE1550-09          | HM391110                 |
| 1766              | Nisoniades godma    | Pyrginae         | 07-SRNP-21783       | MHAHL173-07           | JF762454                 |
| 1767              | Nisoniades godma    | Pyrginae         | 08-SRNP-2515        | MHMXX1070-09          | JF778148                 |
| 1768              | Nisoniades godma    | Pyrginae         | 09-SRNP-67771       | MHMYE1528-09          | HM391088                 |
| 1769              | Nisoniades godma    | Pyrginae         | 08-SRNP-35368       | MHMXX1067-09          | JF778146                 |
| 1770              | Nisoniades godma    | Pyrginae         | 08-SRNP-20591       | MHMXX1069-09          | JF778147                 |
| 1771              | Nisoniades godma    | Pyrginae         | 08-SRNP-70907       | MHMXX1064-09          | JF778144                 |
| 1772              | Nisoniades godma    | Pyrginae         | 08-SRNP-35367       | MHMXX1066-09          | JF778145                 |
| 1773              | Nisoniades godma    | Pyrginae         | 07-SRNP-41906       | MHAHL170-07           | JF762453                 |
| 1774              | Nisoniades godma    | Pyrginae         | 07-SRNP-22159       | MHAHL234-07           | JF762455                 |
| 1775              | Nisoniades godma    | Pyrginae         | 07-SRNP-2603        | MHAHL160-07           | JF762451                 |
| 1776              | Nisoniades godma    | Pyrginae         | 07-SRNP-21785       | MHAHL164-07           | JF762452                 |
| 1777              | Nisoniades godma    | Pyrginae         | 07-SRNP-2675        | MHAHL157-07           | JF762449                 |
| 1778              | Nisoniades godma    | Pyrginae         | 07-SRNP-3043        | MHAHL158-07           | JF762450                 |
| 1779              | Nisoniades godma    | Pyrginae         | 06-SRNP-60085       | MHMXH863-07           | JF760896                 |
| 1780              | Nisoniades godma    | Pyrginae         | 06-SRNP-60084       | MHMXH882-07           | JF760898                 |
| 1781              | Nisoniades godma    | Pyrginae         | 98-SRNP-4340        | MHAHI339-06           | GU156026                 |
| 1782              | Nisoniades godma    | Pyrginae         | 07-SRNP-35261       | MHMXH862-07           | JF760897                 |
| 1783              | Nisoniades godma    | Pyrginae         | 98-SRNP-4343        | MHAHI337-06           | GU156024                 |
| 1784              | Nisoniades godma    | Pyrginae         | 98-SRNP-4337        | MHAHI338-06           | GU156025                 |
| 1785              | Nisoniades godma    | Pyrginae         | 05-SRNP-30669       | MHAHF071-06           | GU150624                 |
| 1786              | Nisoniades godma    | Pyrginae         | 98-SRNP-4617        | MHAHI336-06           | GU156023                 |
| 1787              | Nisoniades godma    | Pyrginae         | 07-SRNP-65813       | MHMXR048-08           | JF762457                 |
| 1788              | Nisoniades godma    | Pyrginae         | 07-SRNP-65579       | MHMXR051-08           | JF762456                 |
| 1789              | Nisoniades godma    | Pyrginae         | 07-SRNP-55229       | MHAHK297-07           | JF760900                 |
| 1790              | Nisoniades godma    | Pyrginae         | 07-SRNP-55227       | MHAHK298-07           | JF760901                 |
| 1791              | Nisoniades godma    | Pyrginae         | 02-SRNP-5568        | MHAHE137-05           | GU149768                 |



| <b>Tree Order</b> | <b>Species</b>            | <b>Subfamily</b> | <b>ACG Sampleid</b> | <b>BOLD Processid</b> | <b>Genbank Accession</b> |
|-------------------|---------------------------|------------------|---------------------|-----------------------|--------------------------|
| 1792              | Nisoniades godma          | Pyrginae         | 02-SRNP-5569        | MHAHE136-05           | GU149770                 |
| 1793              | Nisoniades godma          | Pyrginae         | 02-SRNP-6253        | MHAHE135-05           | GU149774                 |
| 1794              | Nisoniades godma          | Pyrginae         | 02-SRNP-7146        | MHAHE134-05           | GU149772                 |
| 1795              | Nisoniades godma          | Pyrginae         | 02-SRNP-5582        | MHAHE133-05           | GU149773                 |
| 1796              | Nisoniades godma          | Pyrginae         | 02-SRNP-5571        | MHAHE131-05           | GU149769                 |
| 1797              | Nisoniades godma          | Pyrginae         | 04-SRNP-47998       | MHAHD801-05           | GU161698                 |
| 1798              | Nisoniades godma          | Pyrginae         | 04-SRNP-47987       | MHAHD800-05           | GU161699                 |
| 1799              | Nisoniades godma          | Pyrginae         | 04-SRNP-23805       | MHAHD799-05           | GU161700                 |
| 1800              | Nisoniades godma          | Pyrginae         | 07-SRNP-55730       | MHAHK328-07           | JF760902                 |
| 1801              | Nisoniades godma          | Pyrginae         | 07-SRNP-21248       | MHAHK289-07           | JF760899                 |
| 1802              | Nisoniades godma          | Pyrginae         | 05-SRNP-34138       | MHAHF671-06           | GU150626                 |
| 1803              | Nisoniades godma          | Pyrginae         | 02-SRNP-5578        | MHAHE132-05           | GU149771                 |
| 1804              | Nisoniades godma          | Pyrginae         | 03-SRNP-1412        | CSCR562-04            | DQ293125                 |
| 1805              | Nisoniades godma          | Pyrginae         | 02-SRNP-18975       | MHAHI238-06           | GU156022                 |
| 1806              | Nisoniades godma          | Pyrginae         | 06-SRNP-31175       | MHAHG784-06           | GU151498                 |
| 1807              | Nisoniades godma          | Pyrginae         | 05-SRNP-59705       | MHAHF077-06           | GU150625                 |
| 1808              | Nisoniades godma          | Pyrginae         | 08-SRNP-72371       | MHMXX582-09           | JF778149                 |
| 1809              | Nisoniades godma          | Pyrginae         | 09-SRNP-67700       | MHMYE1529-09          | HM391089                 |
| 1810              | Nisoniades godma          | Pyrginae         | 09-SRNP-75599       | MHMYG2477-10          | HM885904                 |
| 1811              | Nisoniades godma          | Pyrginae         | 09-SRNP-75202       | MHMYG2478-10          | HM885905                 |
| 1812              | Nisoniades Burns02        | Pyrginae         | 05-SRNP-24032       | MHAHG033-06           | GU151496                 |
| 1813              | Nisoniades Burns02        | Pyrginae         | 01-SRNP-14613       | MHAHI335-06           | GU156019                 |
| 1814              | Nisoniades tortaDHJ01     | Pyrginae         | 08-SRNP-2752        | MHMXX1065-09          | JF778150                 |
| 1815              | Nisoniades tortaDHJ02     | Pyrginae         | 08-SRNP-5186        | MHMXX583-09           | JF778151                 |
| 1816              | Nisoniades tortaDHJ02     | Pyrginae         | 06-SRNP-659         | MHAHG231-06           | GU151497                 |
| 1817              | Nisoniades tortaDHJ02     | Pyrginae         | 09-SRNP-3730        | MHMYG2479-10          | HM885906                 |
| 1818              | Nisoniades rubescensDHJ01 | Pyrginae         | 01-SRNP-16913       | MHAHI334-06           | GU156014                 |
| 1819              | Nisoniades rubescensDHJ02 | Pyrginae         | 99-SRNP-2497        | MHAHI332-06           | GU156017                 |
| 1820              | Nisoniades rubescensDHJ02 | Pyrginae         | 99-SRNP-2290        | MHAHI333-06           | GU156018                 |
| 1821              | Nisoniades rubescensDHJ02 | Pyrginae         | 01-SRNP-9028        | MHAHI331-06           | GU156016                 |
| 1822              | Nisoniades rubescensDHJ02 | Pyrginae         | 06-SRNP-4756        | MHAHI179-06           | GU156015                 |
| 1823              | Nisoniades rubescensDHJ02 | Pyrginae         | 05-SRNP-41322       | MHAHF099-06           | GU150614                 |
| 1824              | Nisoniades rubescensDHJ02 | Pyrginae         | 04-SRNP-22441       | MHAHD807-05           | GU161690                 |
| 1825              | Nisoniades rubescensDHJ02 | Pyrginae         | 04-SRNP-48521       | MHAHD805-05           | GU161692                 |
| 1826              | Nisoniades rubescensDHJ02 | Pyrginae         | 04-SRNP-22824       | MHAHD804-05           | GU161691                 |
| 1827              | Nisoniades rubescensDHJ02 | Pyrginae         | 05-SRNP-61949       | MHAHF686-06           | GU150615                 |
| 1828              | Nisoniades rubescensDHJ02 | Pyrginae         | 08-SRNP-65094       | MHMXT165-08           | JF762458                 |
| 1829              | Nisoniades rubescensDHJ02 | Pyrginae         | 09-SRNP-75982       | MHMYG2495-10          | HM885923                 |
| 1830              | Polyctor enops            | Pyrginae         | 06-SRNP-23424       | MHAHK365-07           | JF761042                 |
| 1831              | Polyctor enops            | Pyrginae         | 07-SRNP-20052       | MHAHK366-07           | JF761043                 |
| 1832              | Polyctor enops            | Pyrginae         | 06-SRNP-23355       | MHAHJ551-07           | JF753070                 |
| 1833              | Polyctor enops            | Pyrginae         | 06-SRNP-23356       | MHAHJ550-07           | JF753069                 |
| 1834              | Polyctor enops            | Pyrginae         | 06-SRNP-23354       | MHAHJ549-07           | JF753068                 |
| 1835              | Polyctor enops            | Pyrginae         | 05-SRNP-24534       | MHAHF636-06           | GU150696                 |
| 1836              | Polyctor enops            | Pyrginae         | 05-SRNP-24533       | MHAHF635-06           | GU150694                 |
| 1837              | Polyctor enops            | Pyrginae         | 05-SRNP-24532       | MHAHF637-06           | GU150695                 |
| 1838              | Polyctor enops            | Pyrginae         | 07-SRNP-23555       | MHM XR021-08          | JF762623                 |
| 1839              | Polyctor enops            | Pyrginae         | 07-SRNP-23554       | MHM XR020-08          | JF762624                 |
| 1840              | Polyctor enops            | Pyrginae         | 07-SRNP-23640       | MHM XR019-08          | JF762625                 |
| 1841              | Polyctor enops            | Pyrginae         | 07-SRNP-23639       | MHM XR018-08          | JF762626                 |
| 1842              | Polyctor enops            | Pyrginae         | 07-SRNP-22844       | MHM XR017-08          | JF762627                 |
| 1843              | Polyctor enops            | Pyrginae         | 07-SRNP-23549       | MHM XR016-08          | JF762628                 |
| 1844              | Polyctor enops            | Pyrginae         | 07-SRNP-22845       | MHM XR015-08          | JF762629                 |
| 1845              | Polyctor enops            | Pyrginae         | 07-SRNP-23636       | MHM XR014-08          | JF762630                 |
| 1846              | Polyctor enops            | Pyrginae         | 07-SRNP-23542       | MHM XR013-08          | JF762631                 |
| 1847              | Polyctor enops            | Pyrginae         | 07-SRNP-23544       | MHM XR012-08          | JF762632                 |

| <b>Tree Order</b> | <b>Species</b>      | <b>Subfamily</b> | <b>ACG Sampleid</b> | <b>BOLD Processid</b> | <b>Genbank Accession</b> |
|-------------------|---------------------|------------------|---------------------|-----------------------|--------------------------|
| 1848              | Polycator enops     | Pyrginae         | 07-SRNP-23548       | MHM XO985-08          | JF762635                 |
| 1849              | Polycator enops     | Pyrginae         | 07-SRNP-23551       | MHM XO984-08          | JF762636                 |
| 1850              | Polycator enops     | Pyrginae         | 07-SRNP-23553       | MHM XO983-08          | JF762637                 |
| 1851              | Polycator enops     | Pyrginae         | 07-SRNP-23552       | MHM XO986-08          | JF762634                 |
| 1852              | Polycator enops     | Pyrginae         | 07-SRNP-23550       | MHM XO987-08          | JF762633                 |
| 1853              | Polycator enops     | Pyrginae         | 02-SRNP-30383       | CSCR204-04            | DQ293023                 |
| 1854              | Polycator enops     | Pyrginae         | 02-SRNP-30386       | CSCR205-04            | DQ293024                 |
| 1855              | Polycator enops     | Pyrginae         | 07-SRNP-23545       | MHM XT190-08          | JF762622                 |
| 1856              | Polycator enops     | Pyrginae         | 09-SRNP-23331       | MHMYG2013-10          | HM885415                 |
| 1857              | Polycator polycator | Pyrginae         | 09-SRNP-20156       | MHMYB139-09           |                          |
| 1858              | Polycator polycator | Pyrginae         | 03-SRNP-21493       | CSRII277-04           | DQ293036                 |
| 1859              | Polycator polycator | Pyrginae         | 03-SRNP-29770       | CSRII279-04           | DQ293037                 |
| 1860              | Polycator cleta     | Pyrginae         | 04-SRNP-16175       | MHAHE054-05           | GU149840                 |
| 1861              | Polycator cleta     | Pyrginae         | 04-SRNP-15360       | MHAHC741-05           | DQ293020                 |
| 1862              | Polycator cleta     | Pyrginae         | 04-SRNP-15455       | MHAHC740-05           | DQ293019                 |
| 1863              | Polycator cleta     | Pyrginae         | 04-SRNP-16111       | MHAHC739-05           | DQ293018                 |
| 1864              | Polycator cleta     | Pyrginae         | 95-SRNP-9502        | CSRII264-04           | DQ293008                 |
| 1865              | Polycator cleta     | Pyrginae         | 03-SRNP-37549       | CSRII259-04           | DQ293003                 |
| 1866              | Polycator cleta     | Pyrginae         | 03-SRNP-30883       | CSRII258-04           | DQ293002                 |
| 1867              | Polycator cleta     | Pyrginae         | 98-SRNP-4183        | CSRII265-04           | DQ293009                 |
| 1868              | Polycator cleta     | Pyrginae         | 00-SRNP-20253       | CSRII266-04           | DQ293010                 |
| 1869              | Polycator cleta     | Pyrginae         | 00-SRNP-2150        | CSRII267-04           | DQ293011                 |
| 1870              | Polycator cleta     | Pyrginae         | 03-SRNP-30880       | CSRII256-04           | DQ293000                 |
| 1871              | Polycator cleta     | Pyrginae         | 03-SRNP-30882       | CSRII257-04           | DQ293001                 |
| 1872              | Polycator cleta     | Pyrginae         | 02-SRNP-32285       | CSRII269-04           | DQ293013                 |
| 1873              | Polycator cleta     | Pyrginae         | 02-SRNP-31414       | CSRII268-04           | DQ293012                 |
| 1874              | Polycator cleta     | Pyrginae         | 03-SRNP-37550       | CSRII260-04           | DQ293004                 |
| 1875              | Polycator cleta     | Pyrginae         | 93-SRNP-5853        | CSRII262-04           | DQ293006                 |
| 1876              | Polycator cleta     | Pyrginae         | 95-SRNP-9500        | CSRII263-04           | DQ293007                 |
| 1877              | Polycator cleta     | Pyrginae         | 05-SRNP-61212       | MHAHF701-06           | GU150693                 |
| 1878              | Polycator polycator | Pyrginae         | 02-SRNP-27779       | CSCR207-04            | DQ293027                 |
| 1879              | Polycator cleta     | Pyrginae         | 92-SRNP-4986        | CSRII261-04           | DQ293005                 |
| 1880              | Polycator polycator | Pyrginae         | 05-SRNP-41712       | MHAHF278-06           | GU150701                 |
| 1881              | Polycator polycator | Pyrginae         | 07-SRNP-21961       | MHAHL200-07           | JF762640                 |
| 1882              | Polycator polycator | Pyrginae         | 03-SRNP-29891       | CSRII280-04           | DQ293038                 |
| 1883              | Polycator polycator | Pyrginae         | 00-SRNP-14180       | CSRII283-04           | DQ293041                 |
| 1884              | Polycator polycator | Pyrginae         | 03-SRNP-20449       | CSRII255-04           | DQ293028                 |
| 1885              | Polycator polycator | Pyrginae         | 02-SRNP-7128        | CSRII285-04           | DQ293043                 |
| 1886              | Polycator polycator | Pyrginae         | 80-SRNP-364         | CSRII281-04           | DQ293039                 |
| 1887              | Polycator polycator | Pyrginae         | 05-SRNP-42248       | MHAHF276-06           | GU150698                 |
| 1888              | Polycator polycator | Pyrginae         | 03-SRNP-21456       | CSRII276-04           | DQ293035                 |
| 1889              | Polycator polycator | Pyrginae         | 05-SRNP-6247        | MHAHF702-06           | GU150704                 |
| 1890              | Polycator polycator | Pyrginae         | 05-SRNP-1141        | MHAHF277-06           | GU150700                 |
| 1891              | Polycator polycator | Pyrginae         | 05-SRNP-33391       | MHAHF700-06           | GU150705                 |
| 1892              | Polycator polycator | Pyrginae         | 03-SRNP-9639        | CSRII270-04           | DQ293029                 |
| 1893              | Polycator polycator | Pyrginae         | 03-SRNP-20028       | CSRII275-04           | DQ293034                 |
| 1894              | Polycator polycator | Pyrginae         | 05-SRNP-41517       | MHAHF274-06           | GU150697                 |
| 1895              | Polycator polycator | Pyrginae         | 08-SRNP-4909        | MHM XX512-09          | JF778400                 |
| 1896              | Polycator polycator | Pyrginae         | 08-SRNP-4993        | MHM XX511-09          | JF778399                 |
| 1897              | Polycator polycator | Pyrginae         | 08-SRNP-4991        | MHM XX510-09          | JF778398                 |
| 1898              | Polycator polycator | Pyrginae         | 08-SRNP-5183        | MHM XX509-09          | JF778397                 |
| 1899              | Polycator polycator | Pyrginae         | 08-SRNP-5182        | MHM XX508-09          | JF778396                 |
| 1900              | Polycator polycator | Pyrginae         | 08-SRNP-5181        | MHM XX507-09          | JF778395                 |
| 1901              | Polycator polycator | Pyrginae         | 08-SRNP-5273        | MHM XX506-09          | JF778394                 |
| 1902              | Polycator polycator | Pyrginae         | 08-SRNP-4906        | MHM XX505-09          | JF778393                 |
| 1903              | Polycator polycator | Pyrginae         | 08-SRNP-4903        | MHM XX504-09          | JF778392                 |

| <b>Tree Order</b> | <b>Species</b>    | <b>Subfamily</b> | <b>ACG Sampleid</b> | <b>BOLD Processid</b> | <b>Genbank Accession</b> |
|-------------------|-------------------|------------------|---------------------|-----------------------|--------------------------|
| 1904              | Polyctor polyctor | Pyrginae         | 08-SRNP-4905        | MHMXX503-09           | JF778391                 |
| 1905              | Polyctor polyctor | Pyrginae         | 08-SRNP-4902        | MHMXX502-09           | JF778390                 |
| 1906              | Polyctor polyctor | Pyrginae         | 08-SRNP-4904        | MHMXX501-09           | JF778389                 |
| 1907              | Polyctor polyctor | Pyrginae         | 08-SRNP-4996        | MHMXX500-09           | GU666356                 |
| 1908              | Polyctor polyctor | Pyrginae         | 08-SRNP-20490       | MHMXX885-09           | JF778402                 |
| 1909              | Polyctor polyctor | Pyrginae         | 07-SRNP-2990        | MHAHL202-07           | JF762642                 |
| 1910              | Polyctor polyctor | Pyrginae         | 07-SRNP-21952       | MHAHL201-07           | JF762641                 |
| 1911              | Polyctor polyctor | Pyrginae         | 07-SRNP-21283       | MHAHK705-07           | JF761044                 |
| 1912              | Polyctor polyctor | Pyrginae         | 06-SRNP-31806       | MHAHH793-06           | GU155453                 |
| 1913              | Polyctor polyctor | Pyrginae         | 06-SRNP-31800       | MHAHH792-06           | GU155452                 |
| 1914              | Polyctor polyctor | Pyrginae         | 05-SRNP-41516       | MHAHF279-06           | GU150699                 |
| 1915              | Polyctor polyctor | Pyrginae         | 05-SRNP-42247       | MHAHF275-06           | GU150702                 |
| 1916              | Polyctor polyctor | Pyrginae         | 04-SRNP-21386       | MHAHE061-05           | GU149847                 |
| 1917              | Polyctor polyctor | Pyrginae         | 04-SRNP-61064       | MHAHE060-05           | GU149842                 |
| 1918              | Polyctor polyctor | Pyrginae         | 04-SRNP-21385       | MHAHE059-05           | GU149843                 |
| 1919              | Polyctor polyctor | Pyrginae         | 04-SRNP-23706       | MHAHE058-05           | GU149844                 |
| 1920              | Polyctor polyctor | Pyrginae         | 04-SRNP-61026       | MHAHE056-05           | GU149846                 |
| 1921              | Polyctor polyctor | Pyrginae         | 04-SRNP-60859       | MHAHC743-05           | DQ293022                 |
| 1922              | Polyctor polyctor | Pyrginae         | 04-SRNP-60861       | MHAHC742-05           | DQ293021                 |
| 1923              | Polyctor polyctor | Pyrginae         | 04-SRNP-14595       | MHAHC738-05           | DQ293017                 |
| 1924              | Polyctor polyctor | Pyrginae         | 04-SRNP-42603       | MHAHC737-05           | DQ293016                 |
| 1925              | Polyctor polyctor | Pyrginae         | 04-SRNP-61027       | MHAHC736-05           | DQ293015                 |
| 1926              | Polyctor polyctor | Pyrginae         | 04-SRNP-14594       | MHAHC735-05           | DQ293014                 |
| 1927              | Polyctor polyctor | Pyrginae         | 03-SRNP-9643        | CSRII272-04           | DQ293031                 |
| 1928              | Polyctor polyctor | Pyrginae         | 03-SRNP-9706        | CSRII274-04           | DQ293033                 |
| 1929              | Polyctor polyctor | Pyrginae         | 02-SRNP-7127        | CSRII284-04           | DQ293042                 |
| 1930              | Polyctor polyctor | Pyrginae         | 03-SRNP-9701        | CSRII273-04           | DQ293032                 |
| 1931              | Polyctor polyctor | Pyrginae         | 03-SRNP-9641        | CSRII271-04           | DQ293030                 |
| 1932              | Polyctor polyctor | Pyrginae         | 95-SRNP-9527        | CSRII282-04           | DQ293040                 |
| 1933              | Polyctor polyctor | Pyrginae         | 02-SRNP-31973       | CSCR203-04            | DQ293025                 |
| 1934              | Polyctor polyctor | Pyrginae         | 07-SRNP-24016       | MHMXT099-08           | JF762650                 |
| 1935              | Polyctor polyctor | Pyrginae         | 07-SRNP-20959       | MHAHL199-07           | JF762639                 |
| 1936              | Polyctor polyctor | Pyrginae         | 08-SRNP-355         | MHMXT097-08           | JF762652                 |
| 1937              | Polyctor polyctor | Pyrginae         | 08-SRNP-356         | MHMXT100-08           | JF762649                 |
| 1938              | Polyctor polyctor | Pyrginae         | 08-SRNP-358         | MHMXT107-08           | JF762653                 |
| 1939              | Polyctor polyctor | Pyrginae         | 02-SRNP-7132        | CSCR206-04            | DQ293026                 |
| 1940              | Polyctor polyctor | Pyrginae         | 04-SRNP-61128       | MHAHE057-05           | GU149845                 |
| 1941              | Polyctor polyctor | Pyrginae         | 04-SRNP-56096       | MHAHE055-05           | GU149841                 |
| 1942              | Polyctor polyctor | Pyrginae         | 05-SRNP-34721       | MHAHF704-06           | GU150703                 |
| 1943              | Polyctor polyctor | Pyrginae         | 08-SRNP-350         | MHMXT101-08           | JF762648                 |
| 1944              | Polyctor polyctor | Pyrginae         | 08-SRNP-499         | MHMXT102-08           | JF762647                 |
| 1945              | Polyctor polyctor | Pyrginae         | 08-SRNP-501         | MHMXT103-08           | JF762646                 |
| 1946              | Polyctor polyctor | Pyrginae         | 08-SRNP-500         | MHMXT104-08           | JF762645                 |
| 1947              | Polyctor polyctor | Pyrginae         | 08-SRNP-359         | MHMXT106-08           | JF762643                 |
| 1948              | Polyctor polyctor | Pyrginae         | 08-SRNP-22736       | MHMXY1046-09          | GU666489                 |
| 1949              | Polyctor polyctor | Pyrginae         | 09-SRNP-20479       | MHMYG2374-10          | HM885797                 |
| 1950              | Polyctor polyctor | Pyrginae         | 09-SRNP-20478       | MHMYG2375-10          | HM885798                 |
| 1951              | Polyctor polyctor | Pyrginae         | 09-SRNP-20485       | MHMYG2376-10          | HM885799                 |
| 1952              | Polyctor polyctor | Pyrginae         | 09-SRNP-56143       | MHMYG2505-10          | HM885934                 |
| 1953              | Polyctor polyctor | Pyrginae         | 09-SRNP-20724       | MHMYH190-10           | HM887337                 |
| 1954              | Polyctor polyctor | Pyrginae         | 08-SRNP-22527       | MHMXX513-09           | JF778401                 |
| 1955              | Polyctor polyctor | Pyrginae         | 07-SRNP-20902       | MHAHL198-07           | JF762638                 |
| 1956              | Polyctor polyctor | Pyrginae         | 08-SRNP-360         | MHMXT098-08           | JF762651                 |
| 1957              | Polyctor polyctor | Pyrginae         | 08-SRNP-353         | MHMXT105-08           | JF762644                 |
| 1958              | Polyctor polyctor | Pyrginae         | 09-SRNP-20298       | MHMYB142-09           |                          |
| 1959              | Polyctor polyctor | Pyrginae         | 09-SRNP-23649       | MHMYG2014-10          | HM885416                 |

| <b>Tree Order</b> | <b>Species</b>            | <b>Subfamily</b> | <b>ACG Sampleid</b> | <b>BOLD Processid</b> | <b>Genbank Accession</b> |
|-------------------|---------------------------|------------------|---------------------|-----------------------|--------------------------|
| 1960              | <i>Polyctor cleta</i>     | Pyrginae         | 09-SRNP-12336       | MHMYG2040-10          | HM885442                 |
| 1961              | <i>Noctuana lactifera</i> | Pyrginae         | 02-SRNP-24244       | CSCR163-04            | DQ292765                 |
| 1962              | <i>Noctuana lactifera</i> | Pyrginae         | 02-SRNP-23370       | CSCR162-04            | DQ292764                 |
| 1963              | <i>Noctuana stator</i>    | Pyrginae         | 04-SRNP-2409        | MHAHD047-05           | GU161701                 |
| 1964              | <i>Noctuana stator</i>    | Pyrginae         | 04-SRNP-24455       | MHAHD050-05           | GU161704                 |
| 1965              | <i>Noctuana stator</i>    | Pyrginae         | 04-SRNP-24257       | MHAHE932-06           | GU149776                 |
| 1966              | <i>Noctuana stator</i>    | Pyrginae         | 06-SRNP-60240       | MHMXH857-07           | JF760903                 |
| 1967              | <i>Noctuana stator</i>    | Pyrginae         | 01-SRNP-2693        | MHAHE143-05           | GU149781                 |
| 1968              | <i>Noctuana stator</i>    | Pyrginae         | 07-SRNP-2653        | MHAHL207-07           | JF762461                 |
| 1969              | <i>Noctuana stator</i>    | Pyrginae         | 07-SRNP-2654        | MHAHL206-07           | JF762460                 |
| 1970              | <i>Noctuana stator</i>    | Pyrginae         | 07-SRNP-31904       | MHAHL205-07           | JF762459                 |
| 1971              | <i>Noctuana stator</i>    | Pyrginae         | 07-SRNP-736         | MHMXX418-07           | JF762463                 |
| 1972              | <i>Noctuana stator</i>    | Pyrginae         | 07-SRNP-735         | MHMXX417-07           | JF762464                 |
| 1973              | <i>Noctuana stator</i>    | Pyrginae         | 06-SRNP-7267        | MHAHJ537-07           | JF752942                 |
| 1974              | <i>Noctuana stator</i>    | Pyrginae         | 06-SRNP-6258        | MHAHJ486-07           | JF752941                 |
| 1975              | <i>Noctuana stator</i>    | Pyrginae         | 06-SRNP-43409       | MHAHI583-06           | GU156027                 |
| 1976              | <i>Noctuana stator</i>    | Pyrginae         | 05-SRNP-4577        | MHAHF102-06           | GU150630                 |
| 1977              | <i>Noctuana stator</i>    | Pyrginae         | 05-SRNP-3987        | MHAHF100-06           | GU150627                 |
| 1978              | <i>Noctuana stator</i>    | Pyrginae         | 05-SRNP-32434       | MHAHF093-06           | GU150628                 |
| 1979              | <i>Noctuana stator</i>    | Pyrginae         | 01-SRNP-2492        | MHAHE145-05           | GU149783                 |
| 1980              | <i>Noctuana stator</i>    | Pyrginae         | 01-SRNP-2692        | MHAHE144-05           | GU149782                 |
| 1981              | <i>Noctuana stator</i>    | Pyrginae         | 01-SRNP-2691        | MHAHE142-05           | GU149779                 |
| 1982              | <i>Noctuana stator</i>    | Pyrginae         | 02-SRNP-6661        | MHAHE140-05           | GU149780                 |
| 1983              | <i>Noctuana stator</i>    | Pyrginae         | 02-SRNP-7532        | MHAHE139-05           | GU149778                 |
| 1984              | <i>Noctuana stator</i>    | Pyrginae         | 02-SRNP-17990       | MHAHE138-05           | GU149777                 |
| 1985              | <i>Noctuana stator</i>    | Pyrginae         | 04-SRNP-3780        | MHAHD051-05           | GU161705                 |
| 1986              | <i>Noctuana stator</i>    | Pyrginae         | 04-SRNP-2095        | MHAHD048-05           | GU161702                 |
| 1987              | <i>Noctuana stator</i>    | Pyrginae         | 05-SRNP-5563        | MHAHF799-06           | GU150631                 |
| 1988              | <i>Noctuana stator</i>    | Pyrginae         | 01-SRNP-2493        | MHAHE141-05           | GU149775                 |
| 1989              | <i>Noctuana stator</i>    | Pyrginae         | 05-SRNP-453         | MHAHF101-06           | GU150629                 |
| 1990              | <i>Noctuana stator</i>    | Pyrginae         | 02-SRNP-17989       | CSCR161-04            | DQ292763                 |
| 1991              | <i>Noctuana stator</i>    | Pyrginae         | 01-SRNP-2491        | CSCR160-04            | DQ292762                 |
| 1992              | <i>Noctuana stator</i>    | Pyrginae         | 04-SRNP-41356       | MHAHD049-05           | GU161703                 |
| 1993              | <i>Noctuana stator</i>    | Pyrginae         | 07-SRNP-24112       | MHMXT192-08           | JF762462                 |
| 1994              | <i>Noctuana stator</i>    | Pyrginae         | 08-SRNP-4026        | MHMXX1094-09          | JF778153                 |
| 1995              | <i>Noctuana stator</i>    | Pyrginae         | 08-SRNP-4027        | MHMXX1095-09          | JF778154                 |
| 1996              | <i>Noctuana stator</i>    | Pyrginae         | 08-SRNP-4533        | MHMXX626-09           | JF778152                 |
| 1997              | <i>Staphylus evemerus</i> | Pyrginae         | 00-SRNP-10647       | MHAHG881-06           | GU151651                 |
| 1998              | <i>Staphylus evemerus</i> | Pyrginae         | 99-SRNP-740         | MHAHG884-06           | GU151655                 |
| 1999              | <i>Staphylus evemerus</i> | Pyrginae         | 00-SRNP-10651       | MHAHG880-06           | GU151652                 |
| 2000              | <i>Staphylus evemerus</i> | Pyrginae         | 00-SRNP-10765       | MHAHG879-06           | GU151653                 |
| 2001              | <i>Staphylus evemerus</i> | Pyrginae         | 00-SRNP-10414       | MHAHG878-06           | GU151649                 |
| 2002              | <i>Staphylus evemerus</i> | Pyrginae         | 00-SRNP-10763       | MHAHG876-06           | GU151645                 |
| 2003              | <i>Staphylus evemerus</i> | Pyrginae         | 00-SRNP-10413       | MHAHG875-06           | GU151647                 |
| 2004              | <i>Staphylus evemerus</i> | Pyrginae         | 03-SRNP-23252       | MHAHG873-06           | GU151648                 |
| 2005              | <i>Staphylus evemerus</i> | Pyrginae         | 05-SRNP-35826       | MHAHF094-06           | GU150855                 |
| 2006              | <i>Staphylus evemerus</i> | Pyrginae         | 04-SRNP-35967       | MHAHD122-05           | GU161853                 |
| 2007              | <i>Staphylus evemerus</i> | Pyrginae         | 00-SRNP-10644       | MHAHG877-06           | GU151650                 |
| 2008              | <i>Staphylus evemerus</i> | Pyrginae         | 00-SRNP-10648       | MHAHG874-06           | GU151646                 |
| 2009              | <i>Staphylus evemerus</i> | Pyrginae         | 00-SRNP-10645       | MHAHG882-06           | GU151654                 |
| 2010              | <i>Staphylus evemerus</i> | Pyrginae         | 00-SRNP-10654       | MHAHG883-06           | GU151656                 |
| 2011              | <i>Staphylus evemerus</i> | Pyrginae         | 02-SRNP-23336       | MHAHG897-06           | GU151658                 |
| 2012              | <i>Staphylus evemerus</i> | Pyrginae         | 02-SRNP-23337       | MHAHG898-06           | GU151657                 |
| 2013              | <i>Staphylus evemerus</i> | Pyrginae         | 06-SRNP-35702       | MHAHJ841-07           | JF753167                 |
| 2014              | <i>Staphylus evemerus</i> | Pyrginae         | 07-SRNP-36178       | MHMXP210-08           | JF762940                 |
| 2015              | <i>Bolla zorillaDHJ11</i> | Pyrginae         | 05-SRNP-5923        | MHAHF026-06           | GU150883                 |

| Tree Order | Species                 | Subfamily | ACG Sampleid  | BOLD Processid | Genbank Accession |
|------------|-------------------------|-----------|---------------|----------------|-------------------|
| 2016       | Bolla zorillaDHJ11      | Pyrginae  | 03-SRNP-6884  | MHAHG885-06    | GU151686          |
| 2017       | Bolla zorillaDHJ11      | Pyrginae  | 06-SRNP-7810  | MHAHJ435-07    | JF752487          |
| 2018       | Bolla zorillaDHJ11      | Pyrginae  | 06-SRNP-7811  | MHAHJ436-07    | JF752488          |
| 2019       | Bolla zorillaDHJ09      | Pyrginae  | 05-SRNP-7192  | MHAHF809-06    | GU150886          |
| 2020       | Bolla zorillaDHJ09      | Pyrginae  | 05-SRNP-5451  | MHAHF062-06    | GU150884          |
| 2021       | Bolla zorillaDHJ09      | Pyrginae  | 05-SRNP-7193  | MHAHF807-06    | GU150887          |
| 2022       | Bolla zorillaDHJ09      | Pyrginae  | 05-SRNP-7191  | MHAHF808-06    | GU150885          |
| 2023       | Bolla zorillaDHJ09      | Pyrginae  | 06-SRNP-1939  | MHAHG781-06    | GU151685          |
| 2024       | Bolla zorillaDHJ09      | Pyrginae  | 06-SRNP-9445  | MHAHJ726-07    | JF752486          |
| 2025       | Bolla zorillaDHJ13      | Pyrginae  | 98-SRNP-3082  | MHAHH029-06    | GU155495          |
| 2026       | Bolla zorillaDHJ13      | Pyrginae  | 04-SRNP-3961  | MHAHD134-05    | GU161855          |
| 2027       | Bolla zorillaDHJ13      | Pyrginae  | 98-SRNP-3081  | MHAHH030-06    | GU155496          |
| 2028       | Bolla zorillaDHJ13      | Pyrginae  | 06-SRNP-7350  | MHAHJ693-07    | JF752489          |
| 2029       | Bolla zorillaDHJ02      | Pyrginae  | 04-SRNP-3517  | MHAHD135-05    | GU161856          |
| 2030       | Bolla zorillaDHJ02      | Pyrginae  | 05-SRNP-546   | MHAHF025-06    | GU150856          |
| 2031       | Bolla zorillaDHJ02      | Pyrginae  | 05-SRNP-7189  | MHAHF812-06    | GU150858          |
| 2032       | Bolla zorillaDHJ02      | Pyrginae  | 05-SRNP-7190  | MHAHF813-06    | GU150860          |
| 2033       | Bolla zorillaDHJ02      | Pyrginae  | 02-SRNP-3822  | MHAHG886-06    | GU151660          |
| 2034       | Bolla zorillaDHJ02      | Pyrginae  | 04-SRNP-3614  | MHAHD128-05    | GU161854          |
| 2035       | Bolla zorillaDHJ02      | Pyrginae  | 06-SRNP-9042  | MHAHJ458-07    | JF752484          |
| 2036       | Bolla zorillaDHJ02      | Pyrginae  | 07-SRNP-1168  | MHAHK299-07    | JF760453          |
| 2037       | Bolla zorillaDHJ02      | Pyrginae  | 07-SRNP-611   | MHAHK304-07    | JF760454          |
| 2038       | Bolla zorillaDHJ02      | Pyrginae  | 05-SRNP-5922  | MHAHF798-06    | GU150857          |
| 2039       | Bolla zorillaDHJ02      | Pyrginae  | 05-SRNP-7218  | MHAHF805-06    | GU150859          |
| 2040       | Bolla zorillaDHJ02      | Pyrginae  | 06-SRNP-2051  | MHAHG782-06    | GU151659          |
| 2041       | Bolla zorillaDHJ02      | Pyrginae  | 06-SRNP-4375  | MHAHI184-06    | GU156311          |
| 2042       | Bolla zorillaDHJ02      | Pyrginae  | 06-SRNP-3931  | MHAHI185-06    | GU156312          |
| 2043       | Bolla zorillaDHJ02      | Pyrginae  | 06-SRNP-6672  | MHAHJ437-07    | JF752481          |
| 2044       | Bolla zorillaDHJ02      | Pyrginae  | 06-SRNP-6230  | MHAHJ455-07    | JF752482          |
| 2045       | Bolla zorillaDHJ02      | Pyrginae  | 06-SRNP-6674  | MHAHJ456-07    | JF752483          |
| 2046       | Bolla zorillaDHJ02      | Pyrginae  | 06-SRNP-7405  | MHAHJ697-07    | JF752485          |
| 2047       | Bolla zorillaDHJ02      | Pyrginae  | 07-SRNP-2467  | MHAHL159-07    | JF761683          |
| 2048       | Arteurotia tractipennis | Pyrginae  | 95-SRNP-11460 | CSCR019-04     | DQ291842          |
| 2049       | Arteurotia tractipennis | Pyrginae  | 06-SRNP-1612  | MHAHG796-06    | GU151080          |
| 2050       | Arteurotia tractipennis | Pyrginae  | 95-SRNP-11459 | CSCR018-04     | DQ291841          |
| 2051       | Arteurotia tractipennis | Pyrginae  | 04-SRNP-32635 | MHAHE070-05    | GU149405          |
| 2052       | Arteurotia tractipennis | Pyrginae  | 04-SRNP-32574 | MHAHE069-05    | GU149404          |
| 2053       | Arteurotia tractipennis | Pyrginae  | 96-SRNP-1080  | CSRII168-04    | DQ291844          |
| 2054       | Arteurotia tractipennis | Pyrginae  | 00-SRNP-2356  | CSRII170-04    | DQ291846          |
| 2055       | Arteurotia tractipennis | Pyrginae  | 00-SRNP-2402  | CSRII171-04    | DQ291847          |
| 2056       | Arteurotia tractipennis | Pyrginae  | 00-SRNP-2258  | CSRII169-04    | DQ291845          |
| 2057       | Arteurotia tractipennis | Pyrginae  | 96-SRNP-1001  | CSRII167-04    | DQ291843          |
| 2058       | Arteurotia tractipennis | Pyrginae  | 05-SRNP-30659 | MHAHF121-06    | GU150194          |
| 2059       | Arteurotia tractipennis | Pyrginae  | 06-SRNP-57518 | MHAHJ831-07    | JF752382          |
| 2060       | Bolla evippe            | Pyrginae  | 09-SRNP-57008 | MHMYG2488-10   | HM885915          |
| 2061       | Staphylus Janzen03      | Pyrginae  | 04-SRNP-47281 | MHAHD124-05    | GU161857          |
| 2062       | Staphylus Janzen08      | Pyrginae  | 05-SRNP-7212  | MHAHF777-06    | GU150882          |
| 2063       | Staphylus Janzen08      | Pyrginae  | 06-SRNP-1211  | MHAHG218-06    | GU151684          |
| 2064       | Staphylus Janzen08      | Pyrginae  | 06-SRNP-9509  | MHAHJ457-07    | JF753168          |
| 2065       | Staphylus ascalaphus    | Pyrginae  | 99-SRNP-3147  | MHAHG931-06    | GU151661          |
| 2066       | Staphylus ascalaphus    | Pyrginae  | 00-SRNP-20227 | MHAHH010-06    | GU155497          |
| 2067       | Staphylus ascalaphus    | Pyrginae  | 08-SRNP-55731 | MHMXX1081-09   | JF778473          |
| 2068       | Staphylus ascalaphus    | Pyrginae  | 05-SRNP-55703 | MHAHF030-06    | GU150862          |
| 2069       | Staphylus ascalaphus    | Pyrginae  | 00-SRNP-6524  | MHAHG930-06    | GU151662          |
| 2070       | Staphylus ascalaphus    | Pyrginae  | 05-SRNP-22540 | MHAHF018-06    | GU150861          |
| 2071       | Staphylus ascalaphus    | Pyrginae  | 05-SRNP-55693 | MHAHF023-06    | GU150863          |

| Tree Order | Species              | Subfamily | ACG Sampleid  | BOLD Processid | Genbank Accession |
|------------|----------------------|-----------|---------------|----------------|-------------------|
| 2072       | Staphylus ascalaphus | Pyrginae  | 06-SRNP-7407  | MHAHJ695-07    | JF753159          |
| 2073       | Staphylus ascalaphus | Pyrginae  | 07-SRNP-55673 | MHAHK303-07    | JF761176          |
| 2074       | Staphylus ascalaphus | Pyrginae  | 06-SRNP-19545 | MHAHK305-07    | JF761177          |
| 2075       | Staphylus ascalaphus | Pyrginae  | 08-SRNP-55942 | MHMXX1084-09   | JF778474          |
| 2076       | Staphylus ascalaphus | Pyrginae  | 08-SRNP-55778 | MHMXX1085-09   | JF778475          |
| 2077       | Staphylus ascalaphus | Pyrginae  | 08-SRNP-55888 | MHMXX1086-09   | JF778476          |
| 2078       | Staphylus ascalaphus | Pyrginae  | 05-SRNP-55700 | MHAHF029-06    | GU150864          |
| 2079       | Staphylus ascalaphus | Pyrginae  | 07-SRNP-55652 | MHAHK301-07    | JF761174          |
| 2080       | Staphylus ascalaphus | Pyrginae  | 05-SRNP-55699 | MHAHF046-06    | GU150866          |
| 2081       | Staphylus ascalaphus | Pyrginae  | 05-SRNP-55697 | MHAHF047-06    | GU150865          |
| 2082       | Staphylus ascalaphus | Pyrginae  | 06-SRNP-9159  | MHAHJ526-07    | JF753157          |
| 2083       | Staphylus ascalaphus | Pyrginae  | 06-SRNP-8678  | MHAHJ528-07    | JF753158          |
| 2084       | Staphylus ascalaphus | Pyrginae  | 07-SRNP-55651 | MHAHK300-07    | JF761173          |
| 2085       | Staphylus ascalaphus | Pyrginae  | 07-SRNP-55830 | MHAHK302-07    | JF761175          |
| 2086       | Staphylus ascalaphus | Pyrginae  | 08-SRNP-55975 | MHMXX1087-09   | JF778477          |
| 2087       | Staphylus Janzen10   | Pyrginae  | 05-SRNP-55789 | MHAHF024-06    | GU150888          |
| 2088       | Staphylus vulgata    | Pyrginae  | 04-SRNP-45556 | MHAHG891-06    | GU151694          |
| 2089       | Staphylus vulgata    | Pyrginae  | 03-SRNP-28632 | MHAHG902-06    | GU151700          |
| 2090       | Staphylus vulgata    | Pyrginae  | 04-SRNP-20675 | MHAHG913-06    | GU151705          |
| 2091       | Staphylus vulgata    | Pyrginae  | 04-SRNP-20668 | MHAHH003-06    | GU155526          |
| 2092       | Staphylus vulgata    | Pyrginae  | 04-SRNP-22975 | MHAHD119-05    | GU161865          |
| 2093       | Staphylus vulgata    | Pyrginae  | 05-SRNP-45426 | MHAHF020-06    | GU150890          |
| 2094       | Staphylus vulgata    | Pyrginae  | 02-SRNP-15565 | MHAHH026-06    | GU155517          |
| 2095       | Staphylus vulgata    | Pyrginae  | 02-SRNP-5534  | MHAHG912-06    | GU151706          |
| 2096       | Staphylus vulgata    | Pyrginae  | 04-SRNP-20840 | MHAHH007-06    | GU155525          |
| 2097       | Staphylus vulgata    | Pyrginae  | 02-SRNP-5685  | MHAHH012-06    | GU155515          |
| 2098       | Staphylus vulgata    | Pyrginae  | 02-SRNP-5693  | MHAHH019-06    | GU155521          |
| 2099       | Staphylus vulgata    | Pyrginae  | 02-SRNP-5530  | MHAHH024-06    | GU155520          |
| 2100       | Staphylus vulgata    | Pyrginae  | 02-SRNP-5689  | MHAHH025-06    | GU155518          |
| 2101       | Staphylus vulgata    | Pyrginae  | 02-SRNP-5535  | MHAHH027-06    | GU155516          |
| 2102       | Staphylus vulgata    | Pyrginae  | 06-SRNP-22894 | MHAHJ439-07    | JF753169          |
| 2103       | Staphylus vulgata    | Pyrginae  | 07-SRNP-55674 | MHAHK306-07    | JF761187          |
| 2104       | Staphylus vulgata    | Pyrginae  | 04-SRNP-22011 | MHAHG889-06    | GU151692          |
| 2105       | Staphylus vulgata    | Pyrginae  | 07-SRNP-55812 | MHAHK291-07    | JF761184          |
| 2106       | Staphylus vulgata    | Pyrginae  | 06-SRNP-58302 | MHAHJ696-07    | JF753173          |
| 2107       | Staphylus vulgata    | Pyrginae  | 06-SRNP-22880 | MHAHJ527-07    | JF753171          |
| 2108       | Staphylus vulgata    | Pyrginae  | 04-SRNP-45022 | MHAHH023-06    | GU155522          |
| 2109       | Staphylus vulgata    | Pyrginae  | 03-SRNP-29100 | MHAHH021-06    | GU155519          |
| 2110       | Staphylus vulgata    | Pyrginae  | 02-SRNP-5684  | MHAHG925-06    | GU151707          |
| 2111       | Staphylus vulgata    | Pyrginae  | 02-SRNP-5692  | MHAHG910-06    | GU151687          |
| 2112       | Staphylus vulgata    | Pyrginae  | 04-SRNP-45563 | MHAHG893-06    | GU151689          |
| 2113       | Staphylus vulgata    | Pyrginae  | 04-SRNP-45512 | MHAHG892-06    | GU151691          |
| 2114       | Staphylus vulgata    | Pyrginae  | 04-SRNP-45548 | MHAHG890-06    | GU151695          |
| 2115       | Staphylus vulgata    | Pyrginae  | 04-SRNP-45554 | MHAHG887-06    | GU151688          |
| 2116       | Staphylus vulgata    | Pyrginae  | 05-SRNP-55314 | MHAHF069-06    | GU150897          |
| 2117       | Staphylus vulgata    | Pyrginae  | 05-SRNP-55698 | MHAHF034-06    | GU150891          |
| 2118       | Staphylus vulgata    | Pyrginae  | 05-SRNP-55849 | MHAHF033-06    | GU150895          |
| 2119       | Staphylus vulgata    | Pyrginae  | 05-SRNP-57366 | MHAHF032-06    | GU150896          |
| 2120       | Staphylus vulgata    | Pyrginae  | 05-SRNP-55705 | MHAHF021-06    | GU150889          |
| 2121       | Staphylus vulgata    | Pyrginae  | 05-SRNP-59885 | MHAHF017-06    | GU150894          |
| 2122       | Staphylus vulgata    | Pyrginae  | 05-SRNP-46990 | MHAHF016-06    | GU150892          |
| 2123       | Staphylus vulgata    | Pyrginae  | 05-SRNP-59424 | MHAHF014-06    | GU150893          |
| 2124       | Staphylus vulgata    | Pyrginae  | 04-SRNP-45189 | MHAHD126-05    | GU161863          |
| 2125       | Staphylus vulgata    | Pyrginae  | 04-SRNP-23419 | MHAHD123-05    | GU161864          |
| 2126       | Staphylus vulgata    | Pyrginae  | 04-SRNP-48166 | MHAHD121-05    | GU161867          |
| 2127       | Staphylus vulgata    | Pyrginae  | 04-SRNP-22233 | MHAHG895-06    | GU151699          |

| <b>Tree Order</b> | <b>Species</b>    | <b>Subfamily</b> | <b>ACG Sampleid</b> | <b>BOLD Processid</b> | <b>Genbank Accession</b> |
|-------------------|-------------------|------------------|---------------------|-----------------------|--------------------------|
| 2128              | Staphylus vulgata | Pyrginae         | 04-SRNP-45224       | MHAHD132-05           | GU161866                 |
| 2129              | Staphylus vulgata | Pyrginae         | 04-SRNP-45552       | MHAHG888-06           | GU151693                 |
| 2130              | Staphylus vulgata | Pyrginae         | 98-SRNP-5965        | MHAHG904-06           | GU151696                 |
| 2131              | Staphylus vulgata | Pyrginae         | 02-SRNP-5690        | MHAHG909-06           | GU151690                 |
| 2132              | Staphylus vulgata | Pyrginae         | 98-SRNP-4751        | MHAHG915-06           | GU151703                 |
| 2133              | Staphylus vulgata | Pyrginae         | 06-SRNP-46873       | MHAHJ725-07           | JF753174                 |
| 2134              | Staphylus vulgata | Pyrginae         | 06-SRNP-58287       | MHAHJ849-07           | JF753175                 |
| 2135              | Staphylus vulgata | Pyrginae         | 07-SRNP-55628       | MHAHK290-07           | JF761183                 |
| 2136              | Staphylus vulgata | Pyrginae         | 07-SRNP-55813       | MHAHK294-07           | JF761185                 |
| 2137              | Staphylus vulgata | Pyrginae         | 07-SRNP-55675       | MHAHK296-07           | JF761186                 |
| 2138              | Staphylus vulgata | Pyrginae         | 07-SRNP-55822       | MHAHK309-07           | JF761188                 |
| 2139              | Staphylus vulgata | Pyrginae         | 07-SRNP-23532       | MHMXR057-08           | JF762942                 |
| 2140              | Staphylus vulgata | Pyrginae         | 07-SRNP-65029       | MHMXR070-08           | JF762941                 |
| 2141              | Staphylus vulgata | Pyrginae         | 08-SRNP-55775       | MHMXX1118-09          | JF778485                 |
| 2142              | Staphylus vulgata | Pyrginae         | 03-SRNP-1698        | MHAHG905-06           | GU151702                 |
| 2143              | Staphylus vulgata | Pyrginae         | 04-SRNP-22010       | MHAHG896-06           | GU151698                 |
| 2144              | Staphylus vulgata | Pyrginae         | 04-SRNP-45540       | MHAHG894-06           | GU151697                 |
| 2145              | Staphylus vulgata | Pyrginae         | 05-SRNP-24781       | MHAHF769-06           | GU150899                 |
| 2146              | Staphylus vulgata | Pyrginae         | 04-SRNP-20669       | MHAHD131-05           | GU161868                 |
| 2147              | Staphylus vulgata | Pyrginae         | 05-SRNP-20931       | MHAHF066-06           | GU150898                 |
| 2148              | Staphylus vulgata | Pyrginae         | 02-SRNP-5681        | MHAHG906-06           | GU151701                 |
| 2149              | Staphylus vulgata | Pyrginae         | 03-SRNP-1969        | MHAHG914-06           | GU151704                 |
| 2150              | Staphylus vulgata | Pyrginae         | 02-SRNP-15215       | MHAHG932-06           | GU151708                 |
| 2151              | Staphylus vulgata | Pyrginae         | 02-SRNP-5917        | MHAHG933-06           | GU151709                 |
| 2152              | Staphylus vulgata | Pyrginae         | 04-SRNP-20841       | MHAHH001-06           | GU155524                 |
| 2153              | Staphylus vulgata | Pyrginae         | 03-SRNP-28724       | MHAHH028-06           | GU155514                 |
| 2154              | Staphylus vulgata | Pyrginae         | 02-SRNP-14335       | MHAHH033-06           | GU155523                 |
| 2155              | Staphylus vulgata | Pyrginae         | 06-SRNP-57164       | MHAHI187-06           | GU156320                 |
| 2156              | Staphylus vulgata | Pyrginae         | 06-SRNP-22103       | MHAHJ464-07           | JF753170                 |
| 2157              | Staphylus vulgata | Pyrginae         | 06-SRNP-22892       | MHAHJ531-07           | JF753172                 |
| 2158              | Staphylus vulgata | Pyrginae         | 07-SRNP-55155       | MHAHK153-07           | JF761182                 |
| 2159              | Staphylus vulgata | Pyrginae         | 08-SRNP-65738       | MHMXX1117-09          | JF778484                 |
| 2160              | Staphylus vulgata | Pyrginae         | 08-SRNP-24000       | MHMYB157-09           | GU649680                 |
| 2161              | Staphylus azteca  | Pyrginae         | 00-SRNP-6527        | MHAHH016-06           | GU155502                 |
| 2162              | Staphylus azteca  | Pyrginae         | 05-SRNP-55694       | MHAHF081-06           | GU150881                 |
| 2163              | Staphylus azteca  | Pyrginae         | 00-SRNP-6505        | MHAHI237-06           | GU156319                 |
| 2164              | Staphylus azteca  | Pyrginae         | 02-SRNP-17510       | MHAHH022-06           | GU155506                 |
| 2165              | Staphylus azteca  | Pyrginae         | 02-SRNP-5531        | MHAHH020-06           | GU155505                 |
| 2166              | Staphylus azteca  | Pyrginae         | 98-SRNP-5974        | MHAHH031-06           | GU155508                 |
| 2167              | Staphylus azteca  | Pyrginae         | 00-SRNP-6532        | MHAHH014-06           | GU155498                 |
| 2168              | Staphylus azteca  | Pyrginae         | 02-SRNP-5688        | MHAHH013-06           | GU155499                 |
| 2169              | Staphylus azteca  | Pyrginae         | 00-SRNP-20190       | MHAHH004-06           | GU155513                 |
| 2170              | Staphylus azteca  | Pyrginae         | 03-SRNP-2688        | MHAHG929-06           | GU151683                 |
| 2171              | Staphylus azteca  | Pyrginae         | 03-SRNP-2728        | MHAHG926-06           | GU151682                 |
| 2172              | Staphylus azteca  | Pyrginae         | 04-SRNP-20603       | MHAHG922-06           | GU151675                 |
| 2173              | Staphylus azteca  | Pyrginae         | 02-SRNP-28722       | MHAHG908-06           | GU151669                 |
| 2174              | Staphylus azteca  | Pyrginae         | 02-SRNP-5769        | MHAHG907-06           | GU151670                 |
| 2175              | Staphylus azteca  | Pyrginae         | 05-SRNP-55695       | MHAHF035-06           | GU150878                 |
| 2176              | Staphylus azteca  | Pyrginae         | 05-SRNP-22538       | MHAHF015-06           | GU150877                 |
| 2177              | Staphylus azteca  | Pyrginae         | 04-SRNP-22976       | MHAHD129-05           | GU161862                 |
| 2178              | Staphylus azteca  | Pyrginae         | 04-SRNP-23046       | MHAHD120-05           | GU161861                 |
| 2179              | Staphylus azteca  | Pyrginae         | 98-SRNP-5973        | MHAHG916-06           | GU151671                 |
| 2180              | Staphylus azteca  | Pyrginae         | 00-SRNP-6536        | MHAHI233-06           | GU156317                 |
| 2181              | Staphylus azteca  | Pyrginae         | 08-SRNP-55660       | MHMXX1079-09          | JF778479                 |
| 2182              | Staphylus azteca  | Pyrginae         | 08-SRNP-55779       | MHMXX1083-09          | JF778482                 |
| 2183              | Staphylus azteca  | Pyrginae         | 08-SRNP-55777       | MHMXX1120-09          | JF778483                 |

| <b>Tree Order</b> | <b>Species</b>     | <b>Subfamily</b> | <b>ACG Sampleid</b> | <b>BOLD Processid</b> | <b>Genbank Accession</b> |
|-------------------|--------------------|------------------|---------------------|-----------------------|--------------------------|
| 2184              | Staphylus azteca   | Pyrginae         | 00-SRNP-20191       | MHAHH005-06           | GU155512                 |
| 2185              | Staphylus azteca   | Pyrginae         | 08-SRNP-55729       | MHMXX1078-09          | JF778478                 |
| 2186              | Staphylus azteca   | Pyrginae         | 07-SRNP-55831       | MHAHK295-07           | JF761180                 |
| 2187              | Staphylus azteca   | Pyrginae         | 06-SRNP-18820       | MHAHK292-07           | JF761178                 |
| 2188              | Staphylus azteca   | Pyrginae         | 02-SRNP-5529        | MHAHH018-06           | GU155504                 |
| 2189              | Staphylus azteca   | Pyrginae         | 00-SRNP-6529        | MHAHH015-06           | GU155503                 |
| 2190              | Staphylus azteca   | Pyrginae         | 03-SRNP-2686        | MHAHG924-06           | GU151681                 |
| 2191              | Staphylus azteca   | Pyrginae         | 00-SRNP-6598        | MHAHG921-06           | GU151677                 |
| 2192              | Staphylus azteca   | Pyrginae         | 00-SRNP-7041        | MHAHG920-06           | GU151678                 |
| 2193              | Staphylus azteca   | Pyrginae         | 04-SRNP-22251       | MHAHG900-06           | GU151665                 |
| 2194              | Staphylus azteca   | Pyrginae         | 04-SRNP-22252       | MHAHG899-06           | GU151666                 |
| 2195              | Staphylus azteca   | Pyrginae         | 05-SRNP-55771       | MHAHF027-06           | GU150879                 |
| 2196              | Staphylus azteca   | Pyrginae         | 05-SRNP-55417       | MHAHF022-06           | GU150876                 |
| 2197              | Staphylus azteca   | Pyrginae         | 03-SRNP-2646        | MHAHG903-06           | GU151668                 |
| 2198              | Staphylus azteca   | Pyrginae         | 02-SRNP-27769       | MHAHG927-06           | GU151680                 |
| 2199              | Staphylus azteca   | Pyrginae         | 02-SRNP-27768       | MHAHH009-06           | GU155510                 |
| 2200              | Staphylus azteca   | Pyrginae         | 00-SRNP-7043        | MHAHG919-06           | GU151674                 |
| 2201              | Staphylus azteca   | Pyrginae         | 03-SRNP-19829       | MHAHG917-06           | GU151673                 |
| 2202              | Staphylus azteca   | Pyrginae         | 02-SRNP-27766       | MHAHH017-06           | GU155501                 |
| 2203              | Staphylus azteca   | Pyrginae         | 98-SRNP-13484       | MHAHH034-06           | GU155507                 |
| 2204              | Staphylus azteca   | Pyrginae         | 00-SRNP-6518        | MHAHI232-06           | GU156316                 |
| 2205              | Staphylus azteca   | Pyrginae         | 02-SRNP-27389       | MHAHG901-06           | GU151667                 |
| 2206              | Staphylus azteca   | Pyrginae         | 00-SRNP-6585        | MHAHI234-06           | GU156314                 |
| 2207              | Staphylus azteca   | Pyrginae         | 00-SRNP-6599        | MHAHI235-06           | GU156315                 |
| 2208              | Staphylus azteca   | Pyrginae         | 07-SRNP-55820       | MHAHK293-07           | JF761179                 |
| 2209              | Staphylus azteca   | Pyrginae         | 00-SRNP-20193       | MHAHG918-06           | GU151676                 |
| 2210              | Staphylus azteca   | Pyrginae         | 02-SRNP-27392       | MHAHH011-06           | GU155500                 |
| 2211              | Staphylus azteca   | Pyrginae         | 08-SRNP-55943       | MHMXX1080-09          | JF778480                 |
| 2212              | Staphylus azteca   | Pyrginae         | 98-SRNP-5691        | MHAHH032-06           | GU155509                 |
| 2213              | Staphylus azteca   | Pyrginae         | 02-SRNP-29445       | MHAHH008-06           | GU155511                 |
| 2214              | Staphylus azteca   | Pyrginae         | 02-SRNP-27393       | MHAHG928-06           | GU151679                 |
| 2215              | Staphylus azteca   | Pyrginae         | 00-SRNP-6587        | MHAHG911-06           | GU151672                 |
| 2216              | Staphylus azteca   | Pyrginae         | 00-SRNP-6533        | MHAHI236-06           | GU156318                 |
| 2217              | Staphylus azteca   | Pyrginae         | 07-SRNP-55875       | MHAHK310-07           | JF761181                 |
| 2218              | Staphylus azteca   | Pyrginae         | 08-SRNP-55945       | MHMXX1082-09          | JF778481                 |
| 2219              | Staphylus azteca   | Pyrginae         | 09-SRNP-68493       | MHMYG2487-10          | HM885914                 |
| 2220              | Staphylus caribbea | Pyrginae         | 07-SRNP-65990       | MHMXR055-08           | JF762937                 |
| 2221              | Staphylus caribbea | Pyrginae         | 05-SRNP-6745        | MHAHF793-06           | GU150869                 |
| 2222              | Staphylus caribbea | Pyrginae         | 08-SRNP-6754        | MHMXXZ041-09          |                          |
| 2223              | Staphylus caribbea | Pyrginae         | 07-SRNP-22962       | MHMXR056-08           | JF762936                 |
| 2224              | Staphylus caribbea | Pyrginae         | 04-SRNP-42021       | MHAHD133-05           | GU161859                 |
| 2225              | Staphylus caribbea | Pyrginae         | 07-SRNP-3050        | MHAHL161-07           | JF762935                 |
| 2226              | Staphylus caribbea | Pyrginae         | 06-SRNP-2133        | MHAHG783-06           | GU151663                 |
| 2227              | Staphylus caribbea | Pyrginae         | 07-SRNP-3052        | MHMXP218-08           | JF762938                 |
| 2228              | Staphylus caribbea | Pyrginae         | 06-SRNP-316         | MHAHG221-06           | GU151664                 |
| 2229              | Staphylus caribbea | Pyrginae         | 09-SRNP-75511       | MHMYG2481-10          | HM885908                 |
| 2230              | Staphylus caribbea | Pyrginae         | 09-SRNP-42728       | MHMYG2482-10          | HM885909                 |
| 2231              | Staphylus caribbea | Pyrginae         | 09-SRNP-68492       | MHMYG2484-10          | HM885911                 |
| 2232              | Staphylus caribbea | Pyrginae         | 06-SRNP-6883        | MHAHJ438-07           | JF753160                 |
| 2233              | Staphylus caribbea | Pyrginae         | 05-SRNP-7211        | MHAHF811-06           | GU150872                 |
| 2234              | Staphylus caribbea | Pyrginae         | 05-SRNP-7214        | MHAHF806-06           | GU150870                 |
| 2235              | Staphylus caribbea | Pyrginae         | 05-SRNP-6743        | MHAHF797-06           | GU150867                 |
| 2236              | Staphylus caribbea | Pyrginae         | 05-SRNP-6797        | MHAHF795-06           | GU150868                 |
| 2237              | Staphylus caribbea | Pyrginae         | 05-SRNP-7213        | MHAHF794-06           | GU150871                 |
| 2238              | Staphylus caribbea | Pyrginae         | 05-SRNP-6906        | MHAHF778-06           | GU150873                 |
| 2239              | Staphylus caribbea | Pyrginae         | 05-SRNP-7752        | MHAHF693-06           | GU150874                 |



| Tree Order | Species               | Subfamily | ACG Sampleid  | BOLD Processid | Genbank Accession |
|------------|-----------------------|-----------|---------------|----------------|-------------------|
| 2240       | Staphylus caribbea    | Pyrginae  | 04-SRNP-42026 | MHAHD127-05    | GU161860          |
| 2241       | Staphylus caribbea    | Pyrginae  | 04-SRNP-42022 | MHAHD125-05    | GU161858          |
| 2242       | Staphylus caribbea    | Pyrginae  | 05-SRNP-7750  | MHAHF694-06    | GU150875          |
| 2243       | Staphylus caribbea    | Pyrginae  | 06-SRNP-5510  | MHAHI183-06    | GU156313          |
| 2244       | Staphylus caribbea    | Pyrginae  | 06-SRNP-9444  | MHAHJ529-07    | JF753161          |
| 2245       | Staphylus caribbea    | Pyrginae  | 06-SRNP-8603  | MHAHJ530-07    | JF753162          |
| 2246       | Staphylus caribbea    | Pyrginae  | 06-SRNP-8454  | MHAHJ532-07    | JF753163          |
| 2247       | Staphylus caribbea    | Pyrginae  | 06-SRNP-9154  | MHAHJ533-07    | JF753164          |
| 2248       | Staphylus caribbea    | Pyrginae  | 06-SRNP-9158  | MHAHJ535-07    | JF753165          |
| 2249       | Staphylus caribbea    | Pyrginae  | 06-SRNP-6882  | MHAHJ694-07    | JF753166          |
| 2250       | Staphylus caribbea    | Pyrginae  | 07-SRNP-3051  | MHMXP217-08    | JF762939          |
| 2251       | Staphylus caribbea    | Pyrginae  | 08-SRNP-6933  | MHMYC507-09    | GU649776          |
| 2252       | Staphylus caribbea    | Pyrginae  | 09-SRNP-44334 | MHMYE1552-09   | HM391112          |
| 2253       | Staphylus caribbea    | Pyrginae  | 09-SRNP-44524 | MHMYE1553-09   | HM391113          |
| 2254       | Staphylus caribbea    | Pyrginae  | 09-SRNP-75315 | MHMYG2483-10   | HM885910          |
| 2255       | Staphylus caribbea    | Pyrginae  | 09-SRNP-68494 | MHMYG2485-10   | HM885912          |
| 2256       | Staphylus caribbea    | Pyrginae  | 09-SRNP-44999 | MHMYG2045-10   | HM885447          |
| 2257       | Spioniades artemides  | Pyrginae  | 07-SRNP-65617 | MHMXO946-08    | JF762934          |
| 2258       | Spioniades abbreviata | Pyrginae  | 05-SRNP-40403 | MHAHF319-06    | GU150853          |
| 2259       | Spioniades abbreviata | Pyrginae  | 05-SRNP-6908  | MHAHF779-06    | GU150854          |
| 2260       | Spioniades abbreviata | Pyrginae  | 03-SRNP-20661 | CSCR582-04     | DQ293330          |
| 2261       | Spioniades abbreviata | Pyrginae  | 03-SRNP-20234 | CSCR581-04     | DQ293329          |
| 2262       | Spioniades abbreviata | Pyrginae  | 04-SRNP-42534 | MHAHD879-05    | GU161852          |
| 2263       | Spioniades abbreviata | Pyrginae  | 08-SRNP-70324 | MHMXW538-09    | JF754168          |
| 2264       | Spioniades abbreviata | Pyrginae  | 09-SRNP-72126 | MHMYE1557-09   | HM391117          |
| 2265       | Grais stigmaticus     | Pyrginae  | 95-SRNP-11369 | CSCR112-04     | DQ292558          |
| 2266       | Doberes anticus       | Pyrginae  | 00-SRNP-9187  | CSRII447-04    | DQ292284          |
| 2267       | Doberes anticus       | Pyrginae  | 00-SRNP-9201  | CSCR089-04     | DQ292283          |
| 2268       | Doberes anticus       | Pyrginae  | 00-SRNP-9246  | CSRII448-04    | DQ292285          |
| 2269       | Achlyodes pallida     | Pyrginae  | 06-SRNP-55557 | MHAHG172-06    | GU151042          |
| 2270       | Achlyodes pallida     | Pyrginae  | 04-SRNP-35303 | MHAHC003-05    | DQ291768          |
| 2271       | Achlyodes pallida     | Pyrginae  | 04-SRNP-46891 | MHAHC019-05    | DQ291770          |
| 2272       | Achlyodes pallida     | Pyrginae  | 04-SRNP-35345 | MHAHC027-05    | DQ291771          |
| 2273       | Achlyodes pallida     | Pyrginae  | 04-SRNP-35699 | MHAHC825-05    | DQ291776          |
| 2274       | Achlyodes pallida     | Pyrginae  | 06-SRNP-59832 | MHMXH851-07    | JF760225          |
| 2275       | Achlyodes pallida     | Pyrginae  | 05-SRNP-35395 | MHAHL106-07    | JF761334          |
| 2276       | Achlyodes pallida     | Pyrginae  | 07-SRNP-1848  | MHAHL190-07    | JF761338          |
| 2277       | Achlyodes pallida     | Pyrginae  | 05-SRNP-2176  | MHAHL107-07    | JF761335          |
| 2278       | Achlyodes pallida     | Pyrginae  | 05-SRNP-59488 | MHAHL105-07    | JF761333          |
| 2279       | Achlyodes pallida     | Pyrginae  | 06-SRNP-60158 | MHMXH852-07    | JF760224          |
| 2280       | Achlyodes pallida     | Pyrginae  | 06-SRNP-58206 | MHAHJ647-07    | JF752347          |
| 2281       | Achlyodes pallida     | Pyrginae  | 04-SRNP-61445 | MHAHC828-05    | DQ291778          |
| 2282       | Achlyodes pallida     | Pyrginae  | 04-SRNP-35305 | MHAHC824-05    | DQ291775          |
| 2283       | Achlyodes pallida     | Pyrginae  | 04-SRNP-35977 | MHAHC822-05    | DQ291774          |
| 2284       | Achlyodes pallida     | Pyrginae  | 04-SRNP-35301 | MHAHC011-05    | DQ291769          |
| 2285       | Achlyodes pallida     | Pyrginae  | 04-SRNP-35304 | MHAHC091-05    | DQ291773          |
| 2286       | Achlyodes pallida     | Pyrginae  | 04-SRNP-45082 | MHAHC083-05    | DQ291772          |
| 2287       | Achlyodes pallida     | Pyrginae  | 06-SRNP-55370 | MHAHG171-06    | GU151043          |
| 2288       | Achlyodes pallida     | Pyrginae  | 03-SRNP-3397  | CSCR299-04     | DQ291767          |
| 2289       | Achlyodes pallida     | Pyrginae  | 06-SRNP-60271 | MHMXH853-07    | JF760223          |
| 2290       | Achlyodes pallida     | Pyrginae  | 02-SRNP-23406 | CSCR005-04     | DQ291766          |
| 2291       | Achlyodes pallida     | Pyrginae  | 04-SRNP-35390 | MHAHC827-05    | DQ291777          |
| 2292       | Achlyodes pallida     | Pyrginae  | 07-SRNP-35141 | MHAHL188-07    | JF761336          |
| 2293       | Achlyodes pallida     | Pyrginae  | 07-SRNP-35829 | MHAHL189-07    | JF761337          |
| 2294       | Achlyodes pallida     | Pyrginae  | 07-SRNP-36029 | MHMXP170-08    | JF761339          |
| 2295       | Achlyodes pallida     | Pyrginae  | 09-SRNP-57230 | MHMYE1519-09   | GU653485          |

| <b>Tree Order</b> | <b>Species</b>    | <b>Subfamily</b> | <b>ACG Sampleid</b> | <b>BOLD Processid</b> | <b>Genbank Accession</b> |
|-------------------|-------------------|------------------|---------------------|-----------------------|--------------------------|
| 2296              | Eantis thraso     | Pyrginae         | 07-SRNP-1978        | MHAHL227-07           | JF762153                 |
| 2297              | Eantis thraso     | Pyrginae         | 06-SRNP-22421       | MHMXX062-07           | JF762156                 |
| 2298              | Eantis thraso     | Pyrginae         | 96-SRNP-1072        | CSCR007-04            | DQ291780                 |
| 2299              | Eantis thraso     | Pyrginae         | 96-SRNP-262         | CSCR006-04            | DQ291779                 |
| 2300              | Eantis thraso     | Pyrginae         | 04-SRNP-49038       | MHAHE307-05           | GU149321                 |
| 2301              | Eantis thraso     | Pyrginae         | 04-SRNP-41151       | MHAHE308-05           | GU149322                 |
| 2302              | Eantis thraso     | Pyrginae         | 04-SRNP-50037       | MHAHE309-05           | GU149320                 |
| 2303              | Eantis thraso     | Pyrginae         | 04-SRNP-45216       | MHAHE310-05           | GU149317                 |
| 2304              | Eantis thraso     | Pyrginae         | 04-SRNP-48345       | MHAHE312-05           | GU149324                 |
| 2305              | Eantis thraso     | Pyrginae         | 04-SRNP-15358       | MHAHE313-05           | GU149323                 |
| 2306              | Eantis thraso     | Pyrginae         | 04-SRNP-4114        | MHAHE314-05           | GU149319                 |
| 2307              | Eantis thraso     | Pyrginae         | 94-SRNP-279         | MHMXI577-07           | JF760662                 |
| 2308              | Eantis thraso     | Pyrginae         | 07-SRNP-21152       | MHAHL228-07           | JF762154                 |
| 2309              | Eantis thraso     | Pyrginae         | 07-SRNP-1975        | MHAHL235-07           | JF762155                 |
| 2310              | Eantis thraso     | Pyrginae         | 04-SRNP-45084       | MHAHE311-05           | GU149318                 |
| 2311              | Eantis thraso     | Pyrginae         | 08-SRNP-6018        | MHMXX019-09           | GU665260                 |
| 2312              | Achlyodes busirus | Pyrginae         | 03-SRNP-5736        | CSCR298-04            | DQ291765                 |
| 2313              | Achlyodes busirus | Pyrginae         | 07-SRNP-1804        | MHAHL439-07           | JF761326                 |
| 2314              | Achlyodes busirus | Pyrginae         | 07-SRNP-56770       | MHAHL438-07           | JF761325                 |
| 2315              | Achlyodes busirus | Pyrginae         | 07-SRNP-55259       | MHMXX076-07           | JF761332                 |
| 2316              | Achlyodes busirus | Pyrginae         | 07-SRNP-2136        | MHAHL434-07           | JF761324                 |
| 2317              | Achlyodes busirus | Pyrginae         | 07-SRNP-1984        | MHAHL432-07           | JF761322                 |
| 2318              | Achlyodes busirus | Pyrginae         | 07-SRNP-55258       | MHMXX078-07           | JF761330                 |
| 2319              | Achlyodes busirus | Pyrginae         | 07-SRNP-55531       | MHMXX077-07           | JF761331                 |
| 2320              | Achlyodes busirus | Pyrginae         | 06-SRNP-44397       | MHAHK013-07           | JF760221                 |
| 2321              | Achlyodes busirus | Pyrginae         | 06-SRNP-44330       | MHAHK011-07           | JF760219                 |
| 2322              | Achlyodes busirus | Pyrginae         | 06-SRNP-9750        | MHAHK010-07           | JF760218                 |
| 2323              | Achlyodes busirus | Pyrginae         | 06-SRNP-59206       | MHAHK006-07           | JF760214                 |
| 2324              | Achlyodes busirus | Pyrginae         | 06-SRNP-44403       | MHAHK005-07           | JF760213                 |
| 2325              | Achlyodes busirus | Pyrginae         | 04-SRNP-47915       | MHAHE358-05           | GU149314                 |
| 2326              | Achlyodes busirus | Pyrginae         | 04-SRNP-48202       | MHAHE357-05           | GU149313                 |
| 2327              | Achlyodes busirus | Pyrginae         | 04-SRNP-48915       | MHAHE356-05           | GU149312                 |
| 2328              | Achlyodes busirus | Pyrginae         | 04-SRNP-48497       | MHAHE355-05           | GU149311                 |
| 2329              | Achlyodes busirus | Pyrginae         | 04-SRNP-32916       | MHAHE353-05           | GU149315                 |
| 2330              | Achlyodes busirus | Pyrginae         | 04-SRNP-48413       | MHAHE352-05           | GU149316                 |
| 2331              | Achlyodes busirus | Pyrginae         | 06-SRNP-44329       | MHAHK007-07           | JF760215                 |
| 2332              | Achlyodes busirus | Pyrginae         | 06-SRNP-44395       | MHAHK009-07           | JF760217                 |
| 2333              | Achlyodes busirus | Pyrginae         | 03-SRNP-5928        | CSCR297-04            | DQ291764                 |
| 2334              | Achlyodes busirus | Pyrginae         | 06-SRNP-58729       | MHAHK008-07           | JF760216                 |
| 2335              | Achlyodes busirus | Pyrginae         | 06-SRNP-44631       | MHAHK012-07           | JF760220                 |
| 2336              | Achlyodes busirus | Pyrginae         | 06-SRNP-59810       | MHAHK014-07           | JF760222                 |
| 2337              | Achlyodes busirus | Pyrginae         | 07-SRNP-1973        | MHAHL433-07           | JF761323                 |
| 2338              | Achlyodes busirus | Pyrginae         | 07-SRNP-57186       | MHMXP120-08           | JF761329                 |
| 2339              | Achlyodes busirus | Pyrginae         | 07-SRNP-45267       | MHMXP121-08           | JF761328                 |
| 2340              | Achlyodes busirus | Pyrginae         | 07-SRNP-45958       | MHMXR902-08           | JF761327                 |
| 2341              | Achlyodes busirus | Pyrginae         | 08-SRNP-2576        | MHMXX1053-09          | JF777534                 |
| 2342              | Achlyodes busirus | Pyrginae         | 08-SRNP-70349       | MHMXX1054-09          | JF777535                 |
| 2343              | Achlyodes busirus | Pyrginae         | 08-SRNP-70359       | MHMXX1055-09          | JF777536                 |
| 2344              | Achlyodes busirus | Pyrginae         | 08-SRNP-2332        | MHMXX1056-09          | JF777537                 |
| 2345              | Achlyodes busirus | Pyrginae         | 08-SRNP-2138        | MHMXX1057-09          | GU666352                 |
| 2346              | Achlyodes busirus | Pyrginae         | 08-SRNP-30931       | MHMXX1058-09          | JF777538                 |
| 2347              | Achlyodes busirus | Pyrginae         | 08-SRNP-20760       | MHMXX1059-09          | JF777539                 |
| 2348              | Achlyodes busirus | Pyrginae         | 08-SRNP-2135        | MHMXX1060-09          | JF777540                 |
| 2349              | Achlyodes busirus | Pyrginae         | 08-SRNP-4869        | MHMXX651-09           | JF777541                 |
| 2350              | Achlyodes busirus | Pyrginae         | 08-SRNP-5054        | MHMXX652-09           | JF777542                 |
| 2351              | Achlyodes busirus | Pyrginae         | 09-SRNP-69109       | MHMYC528-09           | GU649813                 |

| Tree Order | Species                 | Subfamily | ACG Sampleid  | BOLD Processid | Genbank Accession |
|------------|-------------------------|-----------|---------------|----------------|-------------------|
| 2352       | Aethilla echina         | Pyrginae  | 05-SRNP-20    | MHACG848-05    | DQ291781          |
| 2353       | Aethilla lavocheaDHJ01  | Pyrginae  | 08-SRNP-23841 | MHMYB180-09    | HM431657          |
| 2354       | Aethilla lavocheaDHJ02  | Pyrginae  | 07-SRNP-24077 | MHMXR901-08    | JF761340          |
| 2355       | Aethilla lavocheaDHJ02  | Pyrginae  | 08-SRNP-55465 | MHMXW543-09    | JF753640          |
| 2356       | Aethilla lavocheaDHJ02  | Pyrginae  | 08-SRNP-22923 | MHMYX1093-09   | HM390682          |
| 2357       | Aethilla lavocheaDHJ02  | Pyrginae  | 09-SRNP-4333  | MHMYG2440-10   | HM885864          |
| 2358       | Aethilla lavocheaDHJ02  | Pyrginae  | 02-SRNP-14545 | MHAHD503-05    | GU161215          |
| 2359       | Aethilla lavocheaDHJ02  | Pyrginae  | 00-SRNP-2103  | MHAHD513-05    | GU161220          |
| 2360       | Aethilla lavocheaDHJ02  | Pyrginae  | 02-SRNP-4022  | MHAHD512-05    | GU161212          |
| 2361       | Aethilla lavocheaDHJ02  | Pyrginae  | 00-SRNP-4557  | MHAHD511-05    | GU161219          |
| 2362       | Aethilla lavocheaDHJ02  | Pyrginae  | 00-SRNP-2105  | MHAHD509-05    | GU161214          |
| 2363       | Aethilla lavocheaDHJ02  | Pyrginae  | 02-SRNP-4467  | MHAHD508-05    | GU161217          |
| 2364       | Aethilla lavocheaDHJ02  | Pyrginae  | 00-SRNP-4261  | MHAHD507-05    | GU161211          |
| 2365       | Aethilla lavocheaDHJ02  | Pyrginae  | 00-SRNP-4439  | MHAHD506-05    | GU161213          |
| 2366       | Aethilla lavocheaDHJ02  | Pyrginae  | 00-SRNP-4556  | MHAHD505-05    | GU161216          |
| 2367       | Aethilla lavocheaDHJ02  | Pyrginae  | 00-SRNP-4260  | MHAHD504-05    | GU161218          |
| 2368       | Aethilla lavocheaDHJ02  | Pyrginae  | 04-SRNP-49719 | MHAHD900-05    | GU161221          |
| 2369       | Aethilla lavocheaDHJ02  | Pyrginae  | 08-SRNP-23663 | MHMYX1094-09   | GU666450          |
| 2370       | Aethilla lavocheaDHJ02  | Pyrginae  | 08-SRNP-23664 | MHMYB181-09    | GU649663          |
| 2371       | Aethilla lavocheaDHJ02  | Pyrginae  | 09-SRNP-4334  | MHMYG2441-10   | HM885866          |
| 2372       | Ephyriades eugramma     | Pyrginae  | 03-SRNP-3195  | CSCR563-04     | DQ293126          |
| 2373       | Ephyriades eugramma     | Pyrginae  | 03-SRNP-3270  | CSCR564-04     | DQ293127          |
| 2374       | Ephyriades eugramma     | Pyrginae  | 03-SRNP-22990 | CSCR566-04     | DQ293129          |
| 2375       | Ephyriades eugramma     | Pyrginae  | 03-SRNP-22535 | CSCR565-04     | DQ293128          |
| 2376       | Ephyriades eugramma     | Pyrginae  | 07-SRNP-35417 | MHAHL246-07    | JF762233          |
| 2377       | Ephyriades eugramma     | Pyrginae  | 08-SRNP-31277 | MHMXW534-09    | JF753902          |
| 2378       | Ephyriades eugramma     | Pyrginae  | 08-SRNP-35337 | MHMXW535-09    | JF753903          |
| 2379       | Ephyriades eugramma     | Pyrginae  | 09-SRNP-35830 | MHMYE1544-09   | HM391104          |
| 2380       | Ephyriades eugramma     | Pyrginae  | 09-SRNP-35828 | MHMYE1567-09   | HM391127          |
| 2381       | Cycloglypha thrasibulus | Pyrginae  | 06-SRNP-55047 | MHAHG248-06    | GU151336          |
| 2382       | Cycloglypha thrasibulus | Pyrginae  | 06-SRNP-1733  | MHAHG773-06    | GU151334          |
| 2383       | Cycloglypha thrasibulus | Pyrginae  | 05-SRNP-2186  | MHAHF090-06    | GU150356          |
| 2384       | Cycloglypha thrasibulus | Pyrginae  | 05-SRNP-56292 | MHAHF091-06    | GU150355          |
| 2385       | Cycloglypha thrasibulus | Pyrginae  | 05-SRNP-2205  | MHAHF092-06    | GU150357          |
| 2386       | Cycloglypha thrasibulus | Pyrginae  | 06-SRNP-40014 | MHAHG247-06    | GU151335          |
| 2387       | Cycloglypha thrasibulus | Pyrginae  | 07-SRNP-55252 | MHAHK398-07    | JF760633          |
| 2388       | Cycloglypha thrasibulus | Pyrginae  | 07-SRNP-55550 | MHAHK400-07    | JF760634          |
| 2389       | Cycloglypha thrasibulus | Pyrginae  | 07-SRNP-55357 | MHAHK401-07    | JF760635          |
| 2390       | Cycloglypha thrasibulus | Pyrginae  | 06-SRNP-18966 | MHAHK612-07    | JF760636          |
| 2391       | Cycloglypha thrasibulus | Pyrginae  | 06-SRNP-18825 | MHAHK613-07    | JF760637          |
| 2392       | Cycloglypha thrasibulus | Pyrginae  | 06-SRNP-19741 | MHAHK614-07    | JF760638          |
| 2393       | Cycloglypha thrasibulus | Pyrginae  | 07-SRNP-59528 | MHMXP206-08    | JF762003          |
| 2394       | Cycloglypha thrasibulus | Pyrginae  | 08-SRNP-56046 | MHMXX1088-09   | JF777821          |
| 2395       | Cycloglypha thrasibulus | Pyrginae  | 01-SRNP-18101 | MHAHE130-05    | GU149570          |
| 2396       | Cycloglypha thrasibulus | Pyrginae  | 05-SRNP-40775 | MHAHF089-06    | GU150358          |
| 2397       | Cycloglypha thrasibulus | Pyrginae  | 02-SRNP-31147 | MHAHE129-05    | GU149567          |
| 2398       | Cycloglypha thrasibulus | Pyrginae  | 02-SRNP-7413  | MHAHE127-05    | GU149573          |
| 2399       | Cycloglypha thrasibulus | Pyrginae  | 02-SRNP-4616  | MHAHE125-05    | GU149569          |
| 2400       | Cycloglypha thrasibulus | Pyrginae  | 02-SRNP-3233  | MHAHE124-05    | GU149568          |
| 2401       | Cycloglypha thrasibulus | Pyrginae  | 04-SRNP-3850  | MHAHD060-05    | GU161392          |
| 2402       | Cycloglypha thrasibulus | Pyrginae  | 04-SRNP-14593 | MHAHD059-05    | GU161391          |
| 2403       | Cycloglypha thrasibulus | Pyrginae  | 04-SRNP-55588 | MHAHD057-05    | GU161393          |
| 2404       | Cycloglypha thrasibulus | Pyrginae  | 05-SRNP-55022 | MHAHD053-05    | GU161388          |
| 2405       | Cycloglypha thrasibulus | Pyrginae  | 04-SRNP-15456 | MHAHD052-05    | GU161387          |
| 2406       | Cycloglypha thrasibulus | Pyrginae  | 02-SRNP-32143 | MHAHE128-05    | GU149571          |
| 2407       | Cycloglypha thrasibulus | Pyrginae  | 99-SRNP-18551 | CSRII190-04    | DQ292227          |

| Tree Order | Species                 | Subfamily | ACG Sampleid  | BOLD Processid | Genbank Accession |
|------------|-------------------------|-----------|---------------|----------------|-------------------|
| 2408       | Cycloglypha thrasibulus | Pyrginae  | 02-SRNP-31149 | MHAHE126-05    | GU149572          |
| 2409       | Cycloglypha thrasibulus | Pyrginae  | 01-SRNP-4284  | CSRII191-04    | DQ292228          |
| 2410       | Cycloglypha thrasibulus | Pyrginae  | 04-SRNP-45636 | MHAHD054-05    | GU161390          |
| 2411       | Cycloglypha thrasibulus | Pyrginae  | 07-SRNP-23056 | MHMXT191-08    | JF762002          |
| 2412       | Cycloglypha thrasibulus | Pyrginae  | 04-SRNP-15458 | MHAHD055-05    | GU161389          |
| 2413       | Cycloglypha thrasibulus | Pyrginae  | 06-SRNP-19660 | MHMXXH864-07   | JF760632          |
| 2414       | Cycloglypha thrasibulus | Pyrginae  | 08-SRNP-56190 | MHMXX1089-09   | JF777822          |
| 2415       | Cycloglypha thrasibulus | Pyrginae  | 08-SRNP-56183 | MHMXX1090-09   | JF777823          |
| 2416       | Cycloglypha thrasibulus | Pyrginae  | 08-SRNP-21510 | MHMXX1091-09   | JF777824          |
| 2417       | Cycloglypha thrasibulus | Pyrginae  | 08-SRNP-56623 | MHMXX592-09    | JF777819          |
| 2418       | Cycloglypha thrasibulus | Pyrginae  | 08-SRNP-57718 | MHMXX593-09    | JF777820          |
| 2419       | Cycloglypha thrasibulus | Pyrginae  | 08-SRNP-36360 | MHMXX594-09    | HQ992119          |
| 2420       | Ebrietas evanidus       | Pyrginae  | 05-SRNP-24244 | MHAHF629-06    | GU150388          |
| 2421       | Ebrietas evanidus       | Pyrginae  | 06-SRNP-3928  | MHAHI182-06    | GU155957          |
| 2422       | Ebrietas evanidus       | Pyrginae  | 08-SRNP-4776  | MHMXX602-09    | JF777895          |
| 2423       | Chiomara mithrax        | Pyrginae  | 08-SRNP-71174 | MHMXX1063-09   | JF777766          |
| 2424       | Camptopleura theramenes | Pyrginae  | 05-SRNP-23809 | MHAHF649-06    | GU150305          |
| 2425       | Camptopleura theramenes | Pyrginae  | 06-SRNP-46916 | MHAHJ872-07    | JF752496          |
| 2426       | Camptopleura auxoDHJ01  | Pyrginae  | 05-SRNP-43216 | MHAHF676-06    | GU150304          |
| 2427       | Camptopleura auxoDHJ01  | Pyrginae  | 82-SRNP-324   | CSRII174-04    | DQ291963          |
| 2428       | Camptopleura auxoDHJ01  | Pyrginae  | 06-SRNP-65116 | MHAHJ862-07    | JF752495          |
| 2429       | Camptopleura auxoDHJ01  | Pyrginae  | 07-SRNP-42068 | MHMXP203-08    | JF761749          |
| 2430       | Camptopleura auxoDHJ01  | Pyrginae  | 07-SRNP-42282 | MHMXP208-08    | JF761750          |
| 2431       | Camptopleura auxoDHJ01  | Pyrginae  | 08-SRNP-71022 | MHMXX1092-09   | JF777713          |
| 2432       | Camptopleura auxoDHJ02  | Pyrginae  | 03-SRNP-31276 | MHAHI242-06    | GU155852          |
| 2433       | Camptopleura auxoDHJ02  | Pyrginae  | 07-SRNP-41965 | MHMXP204-08    | JF761753          |
| 2434       | Camptopleura auxoDHJ02  | Pyrginae  | 07-SRNP-24033 | MHMXR047-08    | JF761751          |
| 2435       | Camptopleura auxoDHJ02  | Pyrginae  | 07-SRNP-42067 | MHMXP214-08    | JF761754          |
| 2436       | Camptopleura auxoDHJ02  | Pyrginae  | 07-SRNP-42191 | MHMXP205-08    | JF761752          |
| 2437       | Camptopleura auxoDHJ02  | Pyrginae  | 06-SRNP-42908 | MHAHI593-06    | GU155853          |
| 2438       | Camptopleura auxoDHJ02  | Pyrginae  | 04-SRNP-40680 | CSRII173-04    | DQ291962          |
| 2439       | Camptopleura auxoDHJ02  | Pyrginae  | 05-SRNP-43763 | MHAHF695-06    | GU150303          |
| 2440       | Camptopleura auxoDHJ02  | Pyrginae  | 07-SRNP-40646 | MHAHK399-07    | JF760459          |
| 2441       | Camptopleura auxoDHJ02  | Pyrginae  | 08-SRNP-65495 | MHMXX1093-09   | GU666353          |
| 2442       | Camptopleura auxoDHJ02  | Pyrginae  | 08-SRNP-65880 | MHMXX588-09    | JF777714          |
| 2443       | Mylon salvia            | Pyrginae  | 06-SRNP-1769  | MHAHG723-06    | GU151480          |
| 2444       | Mylon salvia            | Pyrginae  | 02-SRNP-16859 | CSCR135-04     | DQ292641          |
| 2445       | Mylon salvia            | Pyrginae  | 02-SRNP-27057 | MHAHK474-07    | JF760873          |
| 2446       | Mylon salvia            | Pyrginae  | 02-SRNP-14878 | MHAHK476-07    | JF760875          |
| 2447       | Mylon salvia            | Pyrginae  | 05-SRNP-32566 | MHAHF718-06    | GU150550          |
| 2448       | Mylon salvia            | Pyrginae  | 02-SRNP-14879 | CSCR134-04     | DQ292640          |
| 2449       | Mylon salvia            | Pyrginae  | 02-SRNP-14882 | MHAHK473-07    | JF760872          |
| 2450       | Mylon salvia            | Pyrginae  | 02-SRNP-14815 | MHAHK472-07    | JF760871          |
| 2451       | Mylon salvia            | Pyrginae  | 06-SRNP-22322 | MHAHJ762-07    | JF752935          |
| 2452       | Mylon salvia            | Pyrginae  | 03-SRNP-3274  | MHAHK471-07    | JF760870          |
| 2453       | Mylon salvia            | Pyrginae  | 02-SRNP-14880 | MHAHK475-07    | JF760874          |
| 2454       | Mylon salvia            | Pyrginae  | 02-SRNP-14883 | MHAHK477-07    | JF760876          |
| 2455       | Mylon salvia            | Pyrginae  | 02-SRNP-14884 | MHAHK478-07    | JF760877          |
| 2456       | Mylon maimon            | Pyrginae  | 06-SRNP-65117 | MHAHJ884-07    | JF752934          |
| 2457       | Mylon maimon            | Pyrginae  | 04-SRNP-15734 | MHAHD687-05    | GU161669          |
| 2458       | Mylon maimon            | Pyrginae  | 04-SRNP-15726 | MHAHD685-05    | GU161666          |
| 2459       | Mylon maimon            | Pyrginae  | 06-SRNP-33362 | MHAHI496-06    | GU156002          |
| 2460       | Mylon maimon            | Pyrginae  | 06-SRNP-55541 | MHAHG326-06    | GU151478          |
| 2461       | Mylon maimon            | Pyrginae  | 05-SRNP-33196 | MHAHF717-06    | GU150548          |
| 2462       | Mylon maimon            | Pyrginae  | 05-SRNP-45185 | MHAHF280-06    | GU150547          |
| 2463       | Mylon maimon            | Pyrginae  | 04-SRNP-15661 | MHAHD688-05    | GU161668          |

| <b>Tree Order</b> | <b>Species</b>         | <b>Subfamily</b> | <b>ACG Sampleid</b> | <b>BOLD Processid</b> | <b>Genbank Accession</b> |
|-------------------|------------------------|------------------|---------------------|-----------------------|--------------------------|
| 2464              | Mylon maimon           | Pyrginae         | 04-SRNP-15653       | MHAHD686-05           | GU161667                 |
| 2465              | Mylon maimon           | Pyrginae         | 02-SRNP-33927       | CSCR133-04            | DQ292637                 |
| 2466              | Mylon maimon           | Pyrginae         | 04-SRNP-25458       | MHAHF287-06           | GU150546                 |
| 2467              | Mylon maimon           | Pyrginae         | 05-SRNP-34629       | MHAHF675-06           | GU150549                 |
| 2468              | Mylon maimon           | Pyrginae         | 96-SRNP-9924        | CSCR132-04            | DQ292636                 |
| 2469              | Mylon maimon           | Pyrginae         | 05-SRNP-66553       | MHAHG327-06           | GU151477                 |
| 2470              | Mylon maimon           | Pyrginae         | 07-SRNP-60850       | MHMXR005-08           | JF762359                 |
| 2471              | Mylon lassia           | Pyrginae         | 04-SRNP-47729       | MHAHD699-05           | GU161659                 |
| 2472              | Mylon lassia           | Pyrginae         | 04-SRNP-49068       | MHAHD703-05           | GU161664                 |
| 2473              | Mylon lassia           | Pyrginae         | 05-SRNP-46313       | MHAHF269-06           | GU150543                 |
| 2474              | Mylon lassia           | Pyrginae         | 07-SRNP-45249       | MHMXP219-08           | JF762358                 |
| 2475              | Mylon lassia           | Pyrginae         | 09-SRNP-22793       | MHMYG2378-10          | HM885801                 |
| 2476              | Mylon lassia           | Pyrginae         | 06-SRNP-32968       | MHAHI166-06           | GU156001                 |
| 2477              | Mylon lassia           | Pyrginae         | 04-SRNP-47995       | MHAHD705-05           | GU161665                 |
| 2478              | Mylon lassia           | Pyrginae         | 05-SRNP-45388       | MHAHF271-06           | GU150544                 |
| 2479              | Mylon lassia           | Pyrginae         | 06-SRNP-33008       | MHAHI167-06           | GU156000                 |
| 2480              | Mylon lassia           | Pyrginae         | 05-SRNP-32431       | MHAHF273-06           | GU150542                 |
| 2481              | Mylon lassia           | Pyrginae         | 05-SRNP-35383       | MHAHF272-06           | GU150541                 |
| 2482              | Mylon lassia           | Pyrginae         | 05-SRNP-45964       | MHAHF270-06           | GU150545                 |
| 2483              | Mylon lassia           | Pyrginae         | 04-SRNP-48829       | MHAHD702-05           | GU161663                 |
| 2484              | Mylon lassia           | Pyrginae         | 04-SRNP-49039       | MHAHD700-05           | GU161660                 |
| 2485              | Mylon lassia           | Pyrginae         | 06-SRNP-31605       | MHAHH794-06           | GU155433                 |
| 2486              | Mylon lassia           | Pyrginae         | 02-SRNP-28954       | CSCR131-04            | DQ292635                 |
| 2487              | Mylon lassia           | Pyrginae         | 02-SRNP-28773       | CSCR130-04            | DQ292634                 |
| 2488              | Mylon lassia           | Pyrginae         | 04-SRNP-32066       | MHAHD701-05           | GU161662                 |
| 2489              | Mylon lassia           | Pyrginae         | 04-SRNP-35482       | MHAHD706-05           | GU161661                 |
| 2490              | Mylon lassia           | Pyrginae         | 07-SRNP-33635       | MHMXT189-08           | JF762357                 |
| 2491              | Mylon lassia           | Pyrginae         | 09-SRNP-36601       | MHMYE1533-09          | HM391093                 |
| 2492              | Mylon lassia           | Pyrginae         | 09-SRNP-22448       | MHMYG2379-10          | HM885802                 |
| 2493              | Timochares trifasciata | Pyrginae         | 05-SRNP-13161       | MHAHF362-06           | GU150931                 |
| 2494              | Timochares trifasciata | Pyrginae         | 05-SRNP-12097       | MHAHF364-06           | GU150934                 |
| 2495              | Timochares trifasciata | Pyrginae         | 03-SRNP-12286       | MHAHD517-05           | GU161892                 |
| 2496              | Timochares trifasciata | Pyrginae         | 05-SRNP-12096       | MHAHF361-06           | GU150930                 |
| 2497              | Timochares trifasciata | Pyrginae         | 05-SRNP-13158       | MHAHF363-06           | GU150929                 |
| 2498              | Timochares trifasciata | Pyrginae         | 05-SRNP-13159       | MHAHF366-06           | GU150933                 |
| 2499              | Timochares trifasciata | Pyrginae         | 03-SRNP-13719       | MHAHD518-05           | GU161893                 |
| 2500              | Timochares trifasciata | Pyrginae         | 05-SRNP-40802       | MHAHF367-06           | GU150932                 |
| 2501              | Timochares trifasciata | Pyrginae         | 05-SRNP-13162       | MHAHF360-06           | GU150928                 |
| 2502              | Timochares trifasciata | Pyrginae         | 04-SRNP-14040       | MHAHE075-05           | GU150124                 |
| 2503              | Timochares trifasciata | Pyrginae         | 04-SRNP-14041       | MHAHE074-05           | GU150123                 |
| 2504              | Timochares trifasciata | Pyrginae         | 03-SRNP-960         | MHAHD516-05           | GU161895                 |
| 2505              | Timochares trifasciata | Pyrginae         | 03-SRNP-14113       | MHAHD515-05           | GU161894                 |
| 2506              | Timochares trifasciata | Pyrginae         | 05-SRNP-19552       | MHAHE375-05           | GU150122                 |
| 2507              | Timochares trifasciata | Pyrginae         | 08-SRNP-72653       | MHMXY1078-09          | GU666460                 |
| 2508              | Helias cama            | Pyrginae         | 01-SRNP-9588        | CSRII213-04           | DQ292559                 |
| 2509              | Helias cama            | Pyrginae         | 05-SRNP-30554       | MHAHF085-06           | GU150494                 |
| 2510              | Helias cama            | Pyrginae         | 05-SRNP-6813        | MHAHF819-06           | GU150499                 |
| 2511              | Helias cama            | Pyrginae         | 06-SRNP-41760       | MHAHI193-06           | GU155981                 |
| 2512              | Helias cama            | Pyrginae         | 07-SRNP-20080       | MHAHK358-07           | JF760781                 |
| 2513              | Helias cama            | Pyrginae         | 08-SRNP-70554       | MHMXX711-09           | JF778025                 |
| 2514              | Helias cama            | Pyrginae         | 02-SRNP-15049       | CSRII214-04           | DQ292560                 |
| 2515              | Helias cama            | Pyrginae         | 04-SRNP-31168       | MHAHD061-05           | GU161536                 |
| 2516              | Helias cama            | Pyrginae         | 05-SRNP-30170       | MHAHD062-05           | GU161535                 |
| 2517              | Helias cama            | Pyrginae         | 04-SRNP-30824       | MHAHD063-05           | GU161534                 |
| 2518              | Helias cama            | Pyrginae         | 05-SRNP-31048       | MHAHF082-06           | GU150497                 |
| 2519              | Helias cama            | Pyrginae         | 05-SRNP-31049       | MHAHF083-06           | GU150498                 |

| <b>Tree Order</b> | <b>Species</b>         | <b>Subfamily</b> | <b>ACG Sampleid</b> | <b>BOLD Processid</b> | <b>Genbank Accession</b> |
|-------------------|------------------------|------------------|---------------------|-----------------------|--------------------------|
| 2520              | Helias cama            | Pyrginae         | 05-SRNP-31193       | MHAHF084-06           | GU150495                 |
| 2521              | Helias cama            | Pyrginae         | 05-SRNP-3359        | MHAHF086-06           | GU150492                 |
| 2522              | Helias cama            | Pyrginae         | 05-SRNP-3199        | MHAHF087-06           | GU150493                 |
| 2523              | Helias cama            | Pyrginae         | 05-SRNP-2671        | MHAHF088-06           | GU150496                 |
| 2524              | Helias cama            | Pyrginae         | 06-SRNP-453         | MHMXA572-06           | JF760778                 |
| 2525              | Helias cama            | Pyrginae         | 06-SRNP-2367        | MHAHG771-06           | GU151431                 |
| 2526              | Helias cama            | Pyrginae         | 07-SRNP-30806       | MHAK356-07            | JF760779                 |
| 2527              | Helias cama            | Pyrginae         | 06-SRNP-22077       | MHAK357-07            | JF760780                 |
| 2528              | Helias cama            | Pyrginae         | 07-SRNP-20157       | MHAK359-07            | JF760782                 |
| 2529              | Helias cama            | Pyrginae         | 07-SRNP-65129       | MHAHL156-07           | JF762275                 |
| 2530              | Helias cama            | Pyrginae         | 08-SRNP-2560        | MHMXX1098-09          | JF778026                 |
| 2531              | Helias cama            | Pyrginae         | 08-SRNP-2431        | MHMXX1186-09          | JF778027                 |
| 2532              | Helias cama            | Pyrginae         | 08-SRNP-72018       | MHMXX595-09           | JF778024                 |
| 2533              | Helias cama            | Pyrginae         | 09-SRNP-30202       | MHMYC504-09           | GU649831                 |
| 2534              | Helias cama            | Pyrginae         | 09-SRNP-30198       | MHMYC506-09           | GU649833                 |
| 2535              | Ebrietas osyris        | Pyrginae         | 05-SRNP-20008       | MHAHD385-05           | GU161467                 |
| 2536              | Ebrietas osyris        | Pyrginae         | 05-SRNP-34654       | MHAHF633-06           | GU150393                 |
| 2537              | Ebrietas osyris        | Pyrginae         | 08-SRNP-70289       | MHMWX544-09           | JF753875                 |
| 2538              | Ebrietas osyris        | Pyrginae         | 08-SRNP-72341       | MHMXX587-09           | JF777896                 |
| 2539              | Cycloglypha enega      | Pyrginae         | 08-SRNP-32246       | MHMXX589-09           | JF777818                 |
| 2540              | Ebrietas anacreonDHJ04 | Pyrginae         | 07-SRNP-61246       | MHMXR045-08           | JF762160                 |
| 2541              | Ebrietas anacreonDHJ04 | Pyrginae         | 07-SRNP-66037       | MHMXR046-08           | JF762159                 |
| 2542              | Ebrietas anacreonDHJ02 | Pyrginae         | 07-SRNP-30890       | MHMXH856-07           | JF760664                 |
| 2543              | Ebrietas anacreonDHJ02 | Pyrginae         | 01-SRNP-17938       | XAA737-04             | DQ292366                 |
| 2544              | Ebrietas anacreonDHJ02 | Pyrginae         | 93-SRNP-5851        | XAA740-04             | DQ292369                 |
| 2545              | Ebrietas anacreonDHJ02 | Pyrginae         | 06-SRNP-30797       | MHAHG249-06           | GU151390                 |
| 2546              | Ebrietas anacreonDHJ02 | Pyrginae         | 04-SRNP-31276       | CSRII413-04           | DQ292364                 |
| 2547              | Ebrietas anacreonDHJ02 | Pyrginae         | 04-SRNP-30931       | CSRII414-04           | DQ292365                 |
| 2548              | Ebrietas anacreonDHJ02 | Pyrginae         | 06-SRNP-59644       | MHMXH867-07           | JF760663                 |
| 2549              | Ebrietas anacreonDHJ02 | Pyrginae         | 07-SRNP-31391       | MHAHL165-07           | JF762157                 |
| 2550              | Ebrietas anacreonDHJ02 | Pyrginae         | 06-SRNP-30796       | MHAHG253-06           | GU151391                 |
| 2551              | Ebrietas anacreonDHJ02 | Pyrginae         | 06-SRNP-31143       | MHAHG772-06           | GU151389                 |
| 2552              | Ebrietas anacreonDHJ02 | Pyrginae         | 06-SRNP-23020       | MHAHJ829-07           | JF752762                 |
| 2553              | Ebrietas anacreonDHJ02 | Pyrginae         | 07-SRNP-59135       | MHMXP207-08           | JF762158                 |
| 2554              | Ebrietas anacreonDHJ02 | Pyrginae         | 08-SRNP-23566       | MHMXX599-09           | JF777893                 |
| 2555              | Ebrietas anacreonDHJ02 | Pyrginae         | 09-SRNP-30594       | MHMYC505-09           | GU649832                 |
| 2556              | Ebrietas anacreonDHJ03 | Pyrginae         | 93-SRNP-5844        | XAA746-04             | DQ292375                 |
| 2557              | Ebrietas anacreonDHJ03 | Pyrginae         | 01-SRNP-18080       | CSRII370-04           | DQ292362                 |
| 2558              | Ebrietas anacreonDHJ03 | Pyrginae         | 94-SRNP-282         | XAA745-04             | DQ292374                 |
| 2559              | Ebrietas anacreonDHJ03 | Pyrginae         | 05-SRNP-33161       | MHAHF781-06           | GU150390                 |
| 2560              | Ebrietas anacreonDHJ03 | Pyrginae         | 06-SRNP-30257       | MHAHG252-06           | GU151396                 |
| 2561              | Ebrietas anacreonDHJ03 | Pyrginae         | 05-SRNP-24345       | MHAHF631-06           | GU150392                 |
| 2562              | Ebrietas anacreonDHJ03 | Pyrginae         | 04-SRNP-32065       | MHAHD798-05           | GU161466                 |
| 2563              | Ebrietas anacreonDHJ03 | Pyrginae         | 01-SRNP-18079       | XAA752-04             | DQ292380                 |
| 2564              | Ebrietas anacreonDHJ03 | Pyrginae         | 93-SRNP-5879        | XAA750-04             | DQ292378                 |
| 2565              | Ebrietas anacreonDHJ03 | Pyrginae         | 02-SRNP-32566       | XAA808-04             | DQ292381                 |
| 2566              | Ebrietas anacreonDHJ03 | Pyrginae         | 93-SRNP-5847        | XAA743-04             | DQ292372                 |
| 2567              | Ebrietas anacreonDHJ03 | Pyrginae         | 93-SRNP-5836        | XAA741-04             | DQ292370                 |
| 2568              | Ebrietas anacreonDHJ03 | Pyrginae         | 93-SRNP-5928        | XAA744-04             | DQ292373                 |
| 2569              | Ebrietas anacreonDHJ03 | Pyrginae         | 02-SRNP-28985       | CSRII389-04           | DQ292363                 |
| 2570              | Ebrietas anacreonDHJ03 | Pyrginae         | 93-SRNP-5876        | XAA742-04             | DQ292371                 |
| 2571              | Ebrietas anacreonDHJ03 | Pyrginae         | 93-SRNP-5846        | XAA739-04             | DQ292368                 |
| 2572              | Ebrietas anacreonDHJ03 | Pyrginae         | 93-SRNP-6182        | XAA738-04             | DQ292367                 |
| 2573              | Ebrietas anacreonDHJ03 | Pyrginae         | 93-SRNP-5839        | XAA747-04             | DQ292376                 |
| 2574              | Ebrietas anacreonDHJ03 | Pyrginae         | 93-SRNP-5629        | XAA749-04             | DQ292377                 |
| 2575              | Ebrietas anacreonDHJ03 | Pyrginae         | 93-SRNP-5840        | XAA751-04             | DQ292379                 |

| Tree Order | Species                | Subfamily | ACG Sampleid  | BOLD Processid | Genbank Accession |
|------------|------------------------|-----------|---------------|----------------|-------------------|
| 2576       | Ebrietas anacreonDHJ03 | Pyrginae  | 05-SRNP-31047 | MHAHF095-06    | GU150389          |
| 2577       | Ebrietas anacreonDHJ03 | Pyrginae  | 05-SRNP-66020 | MHAHF630-06    | GU150391          |
| 2578       | Ebrietas anacreonDHJ03 | Pyrginae  | 06-SRNP-30135 | MHAHG250-06    | GU151394          |
| 2579       | Ebrietas anacreonDHJ03 | Pyrginae  | 06-SRNP-30138 | MHAHG251-06    | GU151393          |
| 2580       | Ebrietas anacreonDHJ03 | Pyrginae  | 06-SRNP-30137 | MHAHG254-06    | GU151397          |
| 2581       | Ebrietas anacreonDHJ03 | Pyrginae  | 06-SRNP-55045 | MHAHG255-06    | GU151395          |
| 2582       | Ebrietas anacreonDHJ03 | Pyrginae  | 06-SRNP-30798 | MHAHG775-06    | GU151392          |
| 2583       | Ebrietas anacreonDHJ03 | Pyrginae  | 06-SRNP-32332 | MHAHI180-06    | GU155958          |
| 2584       | Ebrietas anacreonDHJ03 | Pyrginae  | 07-SRNP-55471 | MHAHK319-07    | JF760665          |
| 2585       | Ebrietas anacreonDHJ03 | Pyrginae  | 08-SRNP-23847 | MHMXX600-09    | JF777894          |
| 2586       | Ebrietas anacreonDHJ03 | Pyrginae  | 09-SRNP-71739 | MHMYE1568-09   | HM391128          |
| 2587       | Ebrietas anacreonDHJ03 | Pyrginae  | 09-SRNP-57295 | MHMYG2475-10   | HM885902          |
| 2588       | Ebrietas anacreonDHJ03 | Pyrginae  | 09-SRNP-12023 | MHMYG2042-10   | HM885444          |
| 2589       | Potamanaxas Burns01    | Pyrginae  | 91-SRNP-132   | CSCR209-04     | DQ293099          |
| 2590       | Potamanaxas Burns01    | Pyrginae  | 07-SRNP-31875 | MHMXXN368-07   | JF762690          |
| 2591       | Potamanaxas Burns02    | Pyrginae  | 07-SRNP-65900 | MHMXR939-08    | JF762692          |
| 2592       | Potamanaxas Burns02    | Pyrginae  | 07-SRNP-65901 | MHMXR940-08    | JF762691          |
| 2593       | Potamanaxas Burns02    | Pyrginae  | 09-SRNP-71252 | MHMYE1543-09   | HM391103          |
| 2594       | Mylon pelopidas        | Pyrginae  | 00-SRNP-6099  | MHAHK467-07    | JF760866          |
| 2595       | Mylon pelopidas        | Pyrginae  | 00-SRNP-6369  | MHAHK464-07    | JF760863          |
| 2596       | Mylon pelopidas        | Pyrginae  | 00-SRNP-6128  | MHAHK460-07    | JF760859          |
| 2597       | Mylon pelopidas        | Pyrginae  | 06-SRNP-12608 | MHAHG800-06    | GU151479          |
| 2598       | Mylon pelopidas        | Pyrginae  | 01-SRNP-17181 | MHAHK469-07    | JF760868          |
| 2599       | Mylon pelopidas        | Pyrginae  | 03-SRNP-649   | CSCR371-04     | DQ292638          |
| 2600       | Mylon pelopidas        | Pyrginae  | 99-SRNP-6171  | MHAHK462-07    | JF760861          |
| 2601       | Mylon pelopidas        | Pyrginae  | 97-SRNP-2965  | MHAHK470-07    | JF760869          |
| 2602       | Mylon pelopidas        | Pyrginae  | 97-SRNP-3873  | MHAHK463-07    | JF760862          |
| 2603       | Mylon pelopidas        | Pyrginae  | 02-SRNP-10065 | MHAHK468-07    | JF760867          |
| 2604       | Mylon pelopidas        | Pyrginae  | 03-SRNP-12052 | CSCR372-04     | DQ292639          |
| 2605       | Mylon pelopidas        | Pyrginae  | 93-SRNP-4445  | MHAHK465-07    | JF760864          |
| 2606       | Mylon pelopidas        | Pyrginae  | 05-SRNP-55075 | MHAHD689-05    | GU161670          |
| 2607       | Mylon pelopidas        | Pyrginae  | 97-SRNP-54    | MHAHK459-07    | JF760858          |
| 2608       | Mylon pelopidas        | Pyrginae  | 94-SRNP-9689  | MHAHK461-07    | JF760860          |
| 2609       | Mylon pelopidas        | Pyrginae  | 95-SRNP-6458  | MHAHK466-07    | JF760865          |
| 2610       | Mylon pelopidas        | Pyrginae  | 07-SRNP-55508 | MHAHK715-07    | JF760853          |
| 2611       | Mylon pelopidas        | Pyrginae  | 07-SRNP-55502 | MHAHK716-07    | JF760854          |
| 2612       | Mylon pelopidas        | Pyrginae  | 07-SRNP-55540 | MHAHK717-07    | JF760855          |
| 2613       | Mylon pelopidas        | Pyrginae  | 07-SRNP-55977 | MHAHK718-07    | JF760856          |
| 2614       | Mylon pelopidas        | Pyrginae  | 07-SRNP-55365 | MHAHK719-07    | JF760857          |
| 2615       | Mylon pelopidas        | Pyrginae  | 08-SRNP-55556 | MHMXX886-09    | JF778091          |
| 2616       | Potamanaxas Burns03    | Pyrginae  | 07-SRNP-32749 | MHMXXN250-07   | JF762694          |
| 2617       | Potamanaxas Burns03    | Pyrginae  | 07-SRNP-32750 | MHMXXN367-07   | JF762693          |
| 2618       | Potamanaxas Burns03    | Pyrginae  | 07-SRNP-32792 | MHMXXO968-08   | JF762695          |
| 2619       | Sostrata pusilla       | Pyrginae  | 05-SRNP-7425  | MHAHF790-06    | GU150850          |
| 2620       | Sostrata pusilla       | Pyrginae  | 07-SRNP-30539 | MHMXXH887-07   | JF761171          |
| 2621       | Sostrata pusilla       | Pyrginae  | 06-SRNP-4305  | MHAHI196-06    | GU156310          |
| 2622       | Sostrata pusilla       | Pyrginae  | 06-SRNP-2403  | MHAHG799-06    | GU151644          |
| 2623       | Sostrata pusilla       | Pyrginae  | 05-SRNP-1719  | MHAHF008-06    | GU150849          |
| 2624       | Sostrata pusilla       | Pyrginae  | 05-SRNP-1859  | MHAHF005-06    | GU150848          |
| 2625       | Sostrata pusilla       | Pyrginae  | 05-SRNP-41675 | MHAHE935-06    | GU150006          |
| 2626       | Sostrata pusilla       | Pyrginae  | 04-SRNP-3394  | MHAHD075-05    | GU161849          |
| 2627       | Sostrata pusilla       | Pyrginae  | 02-SRNP-18306 | CSCR249-04     | DQ293325          |
| 2628       | Sostrata pusilla       | Pyrginae  | 05-SRNP-42029 | MHAHE934-06    | GU150005          |
| 2629       | Sostrata pusilla       | Pyrginae  | 07-SRNP-1449  | MHAHK397-07    | JF761172          |
| 2630       | Sostrata pusilla       | Pyrginae  | 07-SRNP-2998  | MHAHL171-07    | JF762927          |
| 2631       | Sostrata pusilla       | Pyrginae  | 08-SRNP-30865 | MHMXX1099-09   | JF778472          |

| Tree Order | Species                     | Subfamily | ACG Sampleid  | BOLD Processid | Genbank Accession |
|------------|-----------------------------|-----------|---------------|----------------|-------------------|
| 2632       | Sostrata bifasciata nordica | Pyrginae  | 03-SRNP-1099  | CSC415-04      | DQ293323          |
| 2633       | Sostrata bifasciata nordica | Pyrginae  | 05-SRNP-2227  | MHAHF007-06    | GU150840          |
| 2634       | Sostrata bifasciata nordica | Pyrginae  | 08-SRNP-844   | MHMXW420-09    | JF754163          |
| 2635       | Sostrata bifasciata nordica | Pyrginae  | 07-SRNP-1567  | MHAHK395-07    | JF761169          |
| 2636       | Sostrata bifasciata nordica | Pyrginae  | 07-SRNP-1932  | MHAHL172-07    | JF762922          |
| 2637       | Sostrata bifasciata nordica | Pyrginae  | 07-SRNP-58638 | MHMXP216-08    | JF762924          |
| 2638       | Sostrata bifasciata nordica | Pyrginae  | 06-SRNP-3708  | MHAHG798-06    | GU151640          |
| 2639       | Sostrata bifasciata nordica | Pyrginae  | 06-SRNP-3696  | MHAHH427-06    | GU155494          |
| 2640       | Sostrata bifasciata nordica | Pyrginae  | 05-SRNP-213   | MHAHD072-05    | GU161834          |
| 2641       | Sostrata bifasciata nordica | Pyrginae  | 05-SRNP-214   | MHAHF004-06    | GU150838          |
| 2642       | Sostrata bifasciata nordica | Pyrginae  | 04-SRNP-22231 | MHAHD086-05    | GU161846          |
| 2643       | Sostrata bifasciata nordica | Pyrginae  | 04-SRNP-61492 | MHAHD085-05    | GU161845          |
| 2644       | Sostrata bifasciata nordica | Pyrginae  | 04-SRNP-61382 | MHAHD084-05    | GU161842          |
| 2645       | Sostrata bifasciata nordica | Pyrginae  | 04-SRNP-3640  | MHAHD083-05    | GU161844          |
| 2646       | Sostrata bifasciata nordica | Pyrginae  | 04-SRNP-1343  | MHAHD082-05    | GU161843          |
| 2647       | Sostrata bifasciata nordica | Pyrginae  | 04-SRNP-22116 | MHAHD076-05    | GU161840          |
| 2648       | Sostrata bifasciata nordica | Pyrginae  | 04-SRNP-2136  | MHAHD074-05    | GU161839          |
| 2649       | Sostrata bifasciata nordica | Pyrginae  | 05-SRNP-211   | MHAHD073-05    | GU161841          |
| 2650       | Sostrata bifasciata nordica | Pyrginae  | 04-SRNP-50041 | MHAHD070-05    | GU161836          |
| 2651       | Sostrata bifasciata nordica | Pyrginae  | 05-SRNP-212   | MHAHD067-05    | GU161835          |
| 2652       | Sostrata bifasciata nordica | Pyrginae  | 05-SRNP-296   | MHAHF003-06    | GU150837          |
| 2653       | Sostrata bifasciata nordica | Pyrginae  | 05-SRNP-2711  | MHAHE940-06    | GU149999          |
| 2654       | Sostrata bifasciata nordica | Pyrginae  | 04-SRNP-47237 | MHAHD071-05    | GU161838          |
| 2655       | Sostrata bifasciata nordica | Pyrginae  | 03-SRNP-5074  | CSC416-04      | DQ293324          |
| 2656       | Sostrata bifasciata nordica | Pyrginae  | 08-SRNP-24554 | MHMYB161-09    | GU649080          |
| 2657       | Sostrata bifasciata nordica | Pyrginae  | 04-SRNP-23519 | MHAHD087-05    | GU161837          |
| 2658       | Sostrata bifasciata nordica | Pyrginae  | 04-SRNP-24494 | MHAHD088-05    | GU161847          |
| 2659       | Sostrata bifasciata nordica | Pyrginae  | 04-SRNP-22118 | MHAHD089-05    | GU161848          |
| 2660       | Sostrata bifasciata nordica | Pyrginae  | 05-SRNP-47046 | MHAHE933-06    | GU150000          |
| 2661       | Sostrata bifasciata nordica | Pyrginae  | 05-SRNP-4845  | MHAHE936-06    | GU150004          |
| 2662       | Sostrata bifasciata nordica | Pyrginae  | 05-SRNP-32215 | MHAHE937-06    | GU150001          |
| 2663       | Sostrata bifasciata nordica | Pyrginae  | 05-SRNP-46868 | MHAHE938-06    | GU150002          |
| 2664       | Sostrata bifasciata nordica | Pyrginae  | 05-SRNP-3026  | MHAHE939-06    | GU150003          |
| 2665       | Sostrata bifasciata nordica | Pyrginae  | 05-SRNP-45186 | MHAHF001-06    | GU150836          |
| 2666       | Sostrata bifasciata nordica | Pyrginae  | 05-SRNP-2678  | MHAHF002-06    | GU150835          |
| 2667       | Sostrata bifasciata nordica | Pyrginae  | 05-SRNP-31549 | MHAHF006-06    | GU150839          |
| 2668       | Sostrata bifasciata nordica | Pyrginae  | 05-SRNP-22997 | MHAHF009-06    | GU150842          |
| 2669       | Sostrata bifasciata nordica | Pyrginae  | 05-SRNP-40774 | MHAHF010-06    | GU150841          |
| 2670       | Sostrata bifasciata nordica | Pyrginae  | 05-SRNP-707   | MHAHF011-06    | GU150845          |
| 2671       | Sostrata bifasciata nordica | Pyrginae  | 05-SRNP-2270  | MHAHF012-06    | GU150844          |
| 2672       | Sostrata bifasciata nordica | Pyrginae  | 05-SRNP-295   | MHAHF013-06    | GU150843          |
| 2673       | Sostrata bifasciata nordica | Pyrginae  | 05-SRNP-6575  | MHAHF789-06    | GU150846          |
| 2674       | Sostrata bifasciata nordica | Pyrginae  | 05-SRNP-33197 | MHAHF816-06    | GU150847          |
| 2675       | Sostrata bifasciata nordica | Pyrginae  | 06-SRNP-1499  | MHAHG239-06    | GU151643          |
| 2676       | Sostrata bifasciata nordica | Pyrginae  | 06-SRNP-55120 | MHAHG240-06    | GU151642          |
| 2677       | Sostrata bifasciata nordica | Pyrginae  | 06-SRNP-3033  | MHAHG797-06    | GU151641          |
| 2678       | Sostrata bifasciata nordica | Pyrginae  | 06-SRNP-7519  | MHAHJ440-07    | JF753155          |
| 2679       | Sostrata bifasciata nordica | Pyrginae  | 06-SRNP-23019 | MHAHJ485-07    | JF753156          |
| 2680       | Sostrata bifasciata nordica | Pyrginae  | 07-SRNP-637   | MHAHK396-07    | JF761170          |
| 2681       | Sostrata bifasciata nordica | Pyrginae  | 07-SRNP-36575 | MHMXO989-08    | JF762926          |
| 2682       | Sostrata bifasciata nordica | Pyrginae  | 07-SRNP-58637 | MHMXP215-08    | JF762925          |
| 2683       | Sostrata bifasciata nordica | Pyrginae  | 07-SRNP-36790 | MHMXR002-08    | JF762923          |
| 2684       | Sostrata bifasciata nordica | Pyrginae  | 08-SRNP-2265  | MHMXW421-09    | JF754164          |
| 2685       | Sostrata bifasciata nordica | Pyrginae  | 08-SRNP-1977  | MHMXW422-09    | JF754165          |
| 2686       | Sostrata bifasciata nordica | Pyrginae  | 07-SRNP-60822 | MHMXW423-09    | JF754166          |
| 2687       | Sostrata bifasciata nordica | Pyrginae  | 08-SRNP-35027 | MHMXW425-09    | JF754167          |



| Tree Order | Species                     | Subfamily | ACG Sampleid  | BOLD Processid | Genbank Accession |
|------------|-----------------------------|-----------|---------------|----------------|-------------------|
| 2688       | Sostrata bifasciata nordica | Pyrginae  | 08-SRNP-36391 | MHMXX598-09    | JF778471          |
| 2689       | Sostrata bifasciata nordica | Pyrginae  | 09-SRNP-30271 | MHMYC545-09    | GU649798          |
| 2690       | Sostrata bifasciata nordica | Pyrginae  | 09-SRNP-35749 | MHMYE1547-09   | HM391107          |
| 2691       | Sostrata bifasciata nordica | Pyrginae  | 09-SRNP-35141 | MHMYE1548-09   | HM391108          |
| 2692       | Gesta gesta                 | Pyrginae  | 05-SRNP-62098 | MHAHF687-06    | GU150448          |
| 2693       | Gesta gesta                 | Pyrginae  | 96-SRNP-10372 | CSRII197-04    | DQ292509          |
| 2694       | Gesta gesta                 | Pyrginae  | 06-SRNP-18550 | MHAHK322-07    | JF760737          |
| 2695       | Gesta gesta                 | Pyrginae  | 05-SRNP-61955 | MHAHF820-06    | GU150446          |
| 2696       | Gesta gesta                 | Pyrginae  | 93-SRNP-5391  | CSRII196-04    | DQ292508          |
| 2697       | Gesta gesta                 | Pyrginae  | 05-SRNP-63396 | MHAHF688-06    | GU150449          |
| 2698       | Gesta gesta                 | Pyrginae  | 06-SRNP-18548 | MHMXH865-07    | JF760735          |
| 2699       | Gesta gesta                 | Pyrginae  | 06-SRNP-19618 | MHAHI542-06    | GU155976          |
| 2700       | Gesta gesta                 | Pyrginae  | 06-SRNP-18549 | MHMXH868-07    | JF760736          |
| 2701       | Gesta gesta                 | Pyrginae  | 04-SRNP-15977 | MHAHF116-06    | GU150445          |
| 2702       | Gesta gesta                 | Pyrginae  | 05-SRNP-63399 | MHAHF653-06    | GU150447          |
| 2703       | Gesta gesta                 | Pyrginae  | 07-SRNP-61370 | MHMXX1096-09   | JF777976          |
| 2704       | Gesta gesta                 | Pyrginae  | 07-SRNP-61369 | MHMXX1097-09   | JF777977          |
| 2705       | Erynnis tristis             | Pyrginae  | 07-SRNP-55295 | MHMXXK031-07   | JF762246          |
| 2706       | Erynnis tristis             | Pyrginae  | 09-SRNP-55044 | MHMYC438-09    | GU649893          |
| 2707       | Erynnis tristis             | Pyrginae  | 07-SRNP-55321 | MHMXXK032-07   | JF762245          |
| 2708       | Erynnis tristis             | Pyrginae  | 02-SRNP-10325 | MHAHI218-06    | GU155970          |
| 2709       | Erynnis tristis             | Pyrginae  | 09-SRNP-55140 | MHMYC437-09    | HM893840          |
| 2710       | Erynnis tristis             | Pyrginae  | 06-SRNP-57856 | MHAHJ881-07    | JF752780          |
| 2711       | Erynnis tristis             | Pyrginae  | 06-SRNP-57862 | MHAHJ880-07    | JF752779          |
| 2712       | Erynnis tristis             | Pyrginae  | 06-SRNP-57467 | MHAHJ879-07    | JF752778          |
| 2713       | Erynnis tristis             | Pyrginae  | 06-SRNP-57463 | MHAHJ686-07    | JF752776          |
| 2714       | Erynnis tristis             | Pyrginae  | 06-SRNP-57863 | MHAHJ685-07    | JF752775          |
| 2715       | Erynnis tristis             | Pyrginae  | 06-SRNP-57940 | MHAHJ570-07    | JF752774          |
| 2716       | Erynnis tristis             | Pyrginae  | 01-SRNP-15342 | MHAHI221-06    | GU155965          |
| 2717       | Erynnis tristis             | Pyrginae  | 05-SRNP-64103 | MHAHG680-06    | GU151406          |
| 2718       | Erynnis tristis             | Pyrginae  | 05-SRNP-64104 | MHAHG679-06    | GU151407          |
| 2719       | Erynnis tristis             | Pyrginae  | 04-SRNP-12369 | MHAHE068-05    | GU149665          |
| 2720       | Erynnis tristis             | Pyrginae  | 01-SRNP-16043 | MHAHI222-06    | GU155966          |
| 2721       | Erynnis tristis             | Pyrginae  | 05-SRNP-13296 | MHAHF359-06    | GU150442          |
| 2722       | Erynnis tristis             | Pyrginae  | 06-SRNP-57870 | MHAHJ687-07    | JF752777          |
| 2723       | Erynnis tristis             | Pyrginae  | 02-SRNP-10318 | MHAHI217-06    | GU155968          |
| 2724       | Erynnis tristis             | Pyrginae  | 08-SRNP-58579 | MHMYC439-09    | GU649894          |
| 2725       | Erynnis tristis             | Pyrginae  | 06-SRNP-57465 | MHAHJ882-07    | JF752781          |
| 2726       | Erynnis tristis             | Pyrginae  | 05-SRNP-64102 | MHAHG681-06    | GU151405          |
| 2727       | Erynnis tristis             | Pyrginae  | 02-SRNP-10323 | MHAHI220-06    | GU155969          |
| 2728       | Erynnis tristis             | Pyrginae  | 02-SRNP-10320 | MHAHI219-06    | GU155967          |
| 2729       | Erynnis tristis             | Pyrginae  | 08-SRNP-58610 | MHMYC440-09    |                   |
| 2730       | Erynnis tristis             | Pyrginae  | 08-SRNP-58615 | MHMYE887-09    | GU653714          |
| 2731       | Anastrus sempiternus        | Pyrginae  | 01-SRNP-17323 | CSCR012-04     | DQ291808          |
| 2732       | Anastrus sempiternus        | Pyrginae  | 08-SRNP-2645  | MHMXS077-08    | JF761380          |
| 2733       | Anastrus sempiternus        | Pyrginae  | 07-SRNP-4363  | MHMXR769-08    | JF761377          |
| 2734       | Anastrus sempiternus        | Pyrginae  | 07-SRNP-4306  | MHMXR768-08    | JF761378          |
| 2735       | Anastrus sempiternus        | Pyrginae  | 07-SRNP-32152 | MHAHL249-07    | JF761376          |
| 2736       | Anastrus sempiternus        | Pyrginae  | 07-SRNP-12147 | MHMXXK431-07   | JF761381          |
| 2737       | Anastrus sempiternus        | Pyrginae  | 07-SRNP-55616 | MHAHK329-07    | JF760230          |
| 2738       | Anastrus sempiternus        | Pyrginae  | 06-SRNP-60163 | MHMXH860-07    | JF760228          |
| 2739       | Anastrus sempiternus        | Pyrginae  | 06-SRNP-60206 | MHMXH854-07    | JF760229          |
| 2740       | Anastrus sempiternus        | Pyrginae  | 06-SRNP-57897 | MHAHJ886-07    | JF752354          |
| 2741       | Anastrus sempiternus        | Pyrginae  | 06-SRNP-57895 | MHAHJ885-07    | JF752353          |
| 2742       | Anastrus sempiternus        | Pyrginae  | 06-SRNP-57849 | MHAHJ819-07    | JF752352          |
| 2743       | Anastrus sempiternus        | Pyrginae  | 06-SRNP-23197 | MHAHJ752-07    | JF752351          |

| <b>Tree Order</b> | <b>Species</b>       | <b>Subfamily</b> | <b>ACG Sampleid</b> | <b>BOLD Processid</b> | <b>Genbank Accession</b> |
|-------------------|----------------------|------------------|---------------------|-----------------------|--------------------------|
| 2744              | Anastrus sempiternus | Pyrginae         | 05-SRNP-64291       | MHAHF632-06           | GU150171                 |
| 2745              | Anastrus sempiternus | Pyrginae         | 05-SRNP-64292       | MHAHF624-06           | GU150170                 |
| 2746              | Anastrus sempiternus | Pyrginae         | 05-SRNP-1770        | MHAHF179-06           | GU150169                 |
| 2747              | Anastrus sempiternus | Pyrginae         | 04-SRNP-4595        | MHAHE182-05           | GU149355                 |
| 2748              | Anastrus sempiternus | Pyrginae         | 08-SRNP-66006       | MHMXY1050-09          | GU666485                 |
| 2749              | Anastrus sempiternus | Pyrginae         | 08-SRNP-58583       | MHMYC510-09           | GU649829                 |
| 2750              | Anastrus sempiternus | Pyrginae         | 07-SRNP-4302        | MHMXR767-08           | JF761379                 |
| 2751              | Anastrus sempiternus | Pyrginae         | 01-SRNP-17736       | CSCR013-04            | DQ291809                 |
| 2752              | Anastrus sempiternus | Pyrginae         | 09-SRNP-57315       | MHMYE1493-09          | GU653509                 |
| 2753              | Clito aberrans       | Pyrginae         | 06-SRNP-12726       | MHAHG731-06           | GU151305                 |
| 2754              | Clito aberrans       | Pyrginae         | 07-SRNP-55359       | MHAHK710-07           | JF760544                 |
| 2755              | Clito aberrans       | Pyrginae         | 05-SRNP-46256       | MHAHF285-06           | GU150338                 |
| 2756              | Clito aberrans       | Pyrginae         | 08-SRNP-55841       | MHMWX539-09           | JF753825                 |
| 2757              | Clito aberrans       | Pyrginae         | 99-SRNP-18483       | CSCR070-04            | DQ292155                 |
| 2758              | Clito aberrans       | Pyrginae         | 94-SRNP-3152        | CSCR069-04            | DQ292154                 |
| 2759              | Clito aberrans       | Pyrginae         | 05-SRNP-46254       | MHAHF283-06           | GU150336                 |
| 2760              | Clito aberrans       | Pyrginae         | 05-SRNP-46249       | MHAHF284-06           | GU150337                 |
| 2761              | Clito aberrans       | Pyrginae         | 06-SRNP-15483       | MHAHH814-06           | GU155334                 |
| 2762              | Clito aberrans       | Pyrginae         | 07-SRNP-3664        | MHMXXO969-08          | JF761952                 |
| 2763              | Clito aberrans       | Pyrginae         | 07-SRNP-3662        | MHMXXO970-08          | JF761951                 |
| 2764              | Clito aberrans       | Pyrginae         | 07-SRNP-3660        | MHMXXO971-08          | JF761950                 |
| 2765              | Clito aberrans       | Pyrginae         | 08-SRNP-4314        | MHMXX520-09           | JF777769                 |
| 2766              | Clito aberrans       | Pyrginae         | 08-SRNP-4317        | MHMXX521-09           | JF777770                 |
| 2767              | Clito aberrans       | Pyrginae         | 08-SRNP-4315        | MHMXX522-09           | JF777771                 |
| 2768              | Clito aberrans       | Pyrginae         | 08-SRNP-4313        | MHMXX523-09           | JF777772                 |
| 2769              | Clito Burns01        | Pyrginae         | 05-SRNP-34516       | MHAHG225-06           | GU151306                 |
| 2770              | Clito Burns01        | Pyrginae         | 01-SRNP-9229        | CSCR560-04            | DQ292156                 |
| 2771              | Clito Burns01        | Pyrginae         | 01-SRNP-9304        | CSCR561-04            | DQ292157                 |
| 2772              | Clito Burns01        | Pyrginae         | 04-SRNP-21031       | CSRII189-04           | DQ292158                 |
| 2773              | Clito Burns01        | Pyrginae         | 08-SRNP-30288       | MHMXT155-08           | JF761953                 |
| 2774              | Clito Burns01        | Pyrginae         | 08-SRNP-70430       | MHMXX526-09           | JF777773                 |
| 2775              | Anastrus neaeris     | Pyrginae         | 05-SRNP-6078        | MHAHF719-06           | GU150168                 |
| 2776              | Anastrus neaeris     | Pyrginae         | 07-SRNP-65050       | MHAHL233-07           | JF761372                 |
| 2777              | Anastrus neaeris     | Pyrginae         | 05-SRNP-5537        | MHAHF180-06           | GU150167                 |
| 2778              | Anastrus neaeris     | Pyrginae         | 04-SRNP-60781       | MHAHE186-05           | GU149353                 |
| 2779              | Anastrus neaeris     | Pyrginae         | 04-SRNP-60867       | MHAHE185-05           | GU149352                 |
| 2780              | Anastrus neaeris     | Pyrginae         | 04-SRNP-60780       | MHAHE184-05           | GU149350                 |
| 2781              | Anastrus neaeris     | Pyrginae         | 02-SRNP-18593       | CSCR011-04            | DQ291807                 |
| 2782              | Anastrus neaeris     | Pyrginae         | 07-SRNP-65052       | MHAHL231-07           | JF761370                 |
| 2783              | Anastrus neaeris     | Pyrginae         | 04-SRNP-60339       | MHAHE183-05           | GU149349                 |
| 2784              | Anastrus neaeris     | Pyrginae         | 06-SRNP-1371        | MHAHG129-06           | GU151045                 |
| 2785              | Anastrus neaeris     | Pyrginae         | 06-SRNP-1373        | MHAHG130-06           | GU151047                 |
| 2786              | Anastrus neaeris     | Pyrginae         | 06-SRNP-1372        | MHAHG131-06           | GU151046                 |
| 2787              | Anastrus neaeris     | Pyrginae         | 07-SRNP-65051       | MHAHL232-07           | JF761371                 |
| 2788              | Anastrus neaeris     | Pyrginae         | 07-SRNP-35858       | MHMXP174-08           | JF761375                 |
| 2789              | Anastrus neaeris     | Pyrginae         | 08-SRNP-65477       | MHMXS078-08           | JF761374                 |
| 2790              | Anastrus neaeris     | Pyrginae         | 08-SRNP-65478       | MHMXS079-08           | JF761373                 |
| 2791              | Anastrus neaeris     | Pyrginae         | 08-SRNP-40484       | MHMWX540-09           | JF753651                 |
| 2792              | Anastrus neaeris     | Pyrginae         | 08-SRNP-65476       | MHMWX541-09           | JF753652                 |
| 2793              | Anastrus neaeris     | Pyrginae         | 08-SRNP-2106        | MHMWX542-09           | JF753653                 |
| 2794              | Anastrus neaeris     | Pyrginae         | 02-SRNP-16276       | CSCR010-04            | DQ291806                 |
| 2795              | Anastrus neaeris     | Pyrginae         | 04-SRNP-56411       | MHAHE188-05           | GU149354                 |
| 2796              | Anastrus neaeris     | Pyrginae         | 04-SRNP-34562       | MHAHE187-05           | GU149351                 |
| 2797              | Anastrus neaeris     | Pyrginae         | 08-SRNP-36419       | MHMXX584-09           | JF777579                 |
| 2798              | Anastrus neaeris     | Pyrginae         | 09-SRNP-67369       | MHMYE1495-09          | GU653507                 |
| 2799              | Eracon cliniasDHJ02  | Pyrginae         | 05-SRNP-1688        | MHAHF337-06           | GU150438                 |

| Tree Order | Species                        | Subfamily | ACG Sampleid  | BOLD Processid | Genbank Accession |
|------------|--------------------------------|-----------|---------------|----------------|-------------------|
| 2800       | Eracon cliniasDHJ02            | Pyrginae  | 09-SRNP-40707 | MHMYE1545-09   | HM391105          |
| 2801       | Eracon cliniasDHJ01            | Pyrginae  | 05-SRNP-43583 | MHAHF639-06    | GU150436          |
| 2802       | Eracon cliniasDHJ01            | Pyrginae  | 05-SRNP-22364 | MHAHF339-06    | GU150427          |
| 2803       | Eracon cliniasDHJ01            | Pyrginae  | 07-SRNP-42619 | MHMXR774-08    | JF762235          |
| 2804       | Eracon cliniasDHJ01            | Pyrginae  | 07-SRNP-42093 | MHMXO944-08    | JF762237          |
| 2805       | Eracon cliniasDHJ01            | Pyrginae  | 07-SRNP-2980  | MHMXO943-08    | JF762238          |
| 2806       | Eracon cliniasDHJ01            | Pyrginae  | 06-SRNP-44151 | MHAHJ469-07    | JF752773          |
| 2807       | Eracon cliniasDHJ01            | Pyrginae  | 06-SRNP-40016 | MHAHG223-06    | GU151403          |
| 2808       | Eracon cliniasDHJ01            | Pyrginae  | 05-SRNP-7368  | MHAHF640-06    | GU150437          |
| 2809       | Eracon cliniasDHJ01            | Pyrginae  | 05-SRNP-22120 | MHAHF336-06    | GU150434          |
| 2810       | Eracon cliniasDHJ01            | Pyrginae  | 05-SRNP-22121 | MHAHF329-06    | GU150430          |
| 2811       | Eracon cliniasDHJ01            | Pyrginae  | 05-SRNP-22467 | MHAHF328-06    | GU150429          |
| 2812       | Eracon cliniasDHJ01            | Pyrginae  | 07-SRNP-42094 | MHMXO945-08    | JF762236          |
| 2813       | Eracon cliniasDHJ01            | Pyrginae  | 03-SRNP-37802 | CSCR580-04     | DQ292501          |
| 2814       | Eracon cliniasDHJ01            | Pyrginae  | 01-SRNP-5247  | CSCR108-04     | DQ292499          |
| 2815       | Eracon cliniasDHJ01            | Pyrginae  | 05-SRNP-1713  | MHAHF334-06    | GU150428          |
| 2816       | Eracon cliniasDHJ01            | Pyrginae  | 05-SRNP-22396 | MHAHF330-06    | GU150433          |
| 2817       | Eracon cliniasDHJ01            | Pyrginae  | 05-SRNP-3449  | MHAHF331-06    | GU150432          |
| 2818       | Eracon cliniasDHJ01            | Pyrginae  | 05-SRNP-1714  | MHAHF332-06    | GU150431          |
| 2819       | Eracon cliniasDHJ01            | Pyrginae  | 01-SRNP-5289  | CSCR109-04     | DQ292500          |
| 2820       | Eracon cliniasDHJ01            | Pyrginae  | 05-SRNP-3823  | MHAHF333-06    | GU150435          |
| 2821       | Eracon cliniasDHJ01            | Pyrginae  | 05-SRNP-4520  | MHAHF338-06    | GU150426          |
| 2822       | Eracon cliniasDHJ01            | Pyrginae  | 07-SRNP-42620 | MHMXT200-08    | JF762234          |
| 2823       | Eracon cliniasDHJ01            | Pyrginae  | 08-SRNP-65365 | MHMXW402-09    | JF753904          |
| 2824       | Eracon cliniasDHJ01            | Pyrginae  | 08-SRNP-21838 | MHMXW403-09    | JF753905          |
| 2825       | Eracon cliniasDHJ01            | Pyrginae  | 08-SRNP-41449 | MHMXX527-09    | JF777920          |
| 2826       | Eracon cliniasDHJ01            | Pyrginae  | 08-SRNP-41450 | MHMXX528-09    | JF777921          |
| 2827       | Eracon cliniasDHJ01            | Pyrginae  | 09-SRNP-1734  | MHMYE1546-09   | HM391106          |
| 2828       | Chiomara georgina              | Pyrginae  | 07-SRNP-55431 | MHAHK707-07    | JF760541          |
| 2829       | Chiomara georgina              | Pyrginae  | 03-SRNP-12148 | CSCR344-04     | DQ292136          |
| 2830       | Chiomara georgina              | Pyrginae  | 07-SRNP-20138 | MHAHK704-07    | JF760539          |
| 2831       | Chiomara georgina              | Pyrginae  | 08-SRNP-55568 | MHMXX867-09    | JF777765          |
| 2832       | Chiomara georgina              | Pyrginae  | 06-SRNP-12610 | MHAHG732-06    | GU151303          |
| 2833       | Chiomara georgina              | Pyrginae  | 04-SRNP-14129 | MHAHD675-05    | GU161330          |
| 2834       | Chiomara georgina              | Pyrginae  | 04-SRNP-14128 | MHAHD674-05    | GU161328          |
| 2835       | Chiomara georgina              | Pyrginae  | 04-SRNP-14583 | MHAHD673-05    | GU161329          |
| 2836       | Chiomara georgina              | Pyrginae  | 03-SRNP-12149 | CSCR343-04     | DQ292135          |
| 2837       | Chiomara georgina              | Pyrginae  | 05-SRNP-12171 | MHAHF282-06    | GU150334          |
| 2838       | Chiomara georgina              | Pyrginae  | 06-SRNP-22681 | MHAHJ708-07    | JF752568          |
| 2839       | Chiomara georgina              | Pyrginae  | 06-SRNP-22680 | MHAHJ709-07    | JF752569          |
| 2840       | Chiomara georgina              | Pyrginae  | 07-SRNP-12184 | MHAHK706-07    | JF760540          |
| 2841       | Chiomara georgina              | Pyrginae  | 07-SRNP-55287 | MHAHK708-07    | JF760542          |
| 2842       | Chiomara georgina              | Pyrginae  | 07-SRNP-20170 | MHAHK709-07    | JF760543          |
| 2843       | Chiomara georgina              | Pyrginae  | 07-SRNP-57560 | MHMXO965-08    | JF761940          |
| 2844       | Chiomara georgina              | Pyrginae  | 09-SRNP-72879 | MHMYG2381-10   | HM885805          |
| 2845       | Gorgythion begga pyralinaDHJ01 | Pyrginae  | 01-SRNP-15890 | CSRII737-05    | DQ292556          |
| 2846       | Gorgythion begga pyralinaDHJ01 | Pyrginae  | 02-SRNP-16048 | CSRII201-04    | DQ292517          |
| 2847       | Gorgythion begga pyralinaDHJ01 | Pyrginae  | 02-SRNP-32020 | CSRII203-04    | DQ292519          |
| 2848       | Gorgythion begga pyralinaDHJ01 | Pyrginae  | 05-SRNP-31852 | MHAHF039-06    | GU150459          |
| 2849       | Gorgythion begga pyralinaDHJ01 | Pyrginae  | 07-SRNP-20872 | MHAHL178-07    | JF762263          |
| 2850       | Gorgythion begga pyralinaDHJ01 | Pyrginae  | 05-SRNP-358   | MHAHF040-06    | GU150458          |
| 2851       | Gorgythion begga pyralinaDHJ01 | Pyrginae  | 05-SRNP-40713 | MHAHE929-06    | GU149685          |
| 2852       | Gorgythion begga pyralinaDHJ01 | Pyrginae  | 05-SRNP-1709  | MHAHF045-06    | GU150457          |
| 2853       | Gorgythion begga pyralinaDHJ01 | Pyrginae  | 05-SRNP-40714 | MHAHF048-06    | GU150460          |
| 2854       | Gorgythion begga pyralinaDHJ01 | Pyrginae  | 05-SRNP-1707  | MHAHF049-06    | GU150461          |
| 2855       | Gorgythion begga pyralinaDHJ01 | Pyrginae  | 05-SRNP-1706  | MHAHF055-06    | GU150455          |

| <b>Tree Order</b> | <b>Species</b>                 | <b>Subfamily</b> | <b>ACG Sampleid</b> | <b>BOLD Processid</b> | <b>Genbank Accession</b> |
|-------------------|--------------------------------|------------------|---------------------|-----------------------|--------------------------|
| 2856              | Gorgythion begga pyralinaDHJ01 | Pyrginae         | 05-SRNP-1710        | MHAHF060-06           | GU150464                 |
| 2857              | Gorgythion begga pyralinaDHJ01 | Pyrginae         | 05-SRNP-64097       | MHAHF818-06           | GU150466                 |
| 2858              | Gorgythion begga pyralinaDHJ01 | Pyrginae         | 06-SRNP-531         | MHAHG275-06           | GU151421                 |
| 2859              | Gorgythion begga pyralinaDHJ01 | Pyrginae         | 06-SRNP-532         | MHAHG281-06           | GU151424                 |
| 2860              | Gorgythion begga pyralinaDHJ01 | Pyrginae         | 06-SRNP-41261       | MHAHG762-06           | GU151416                 |
| 2861              | Gorgythion begga pyralinaDHJ01 | Pyrginae         | 06-SRNP-31441       | MHAHG766-06           | GU151415                 |
| 2862              | Gorgythion begga pyralinaDHJ01 | Pyrginae         | 06-SRNP-2368        | MHAHG768-06           | GU151417                 |
| 2863              | Gorgythion begga pyralinaDHJ01 | Pyrginae         | 06-SRNP-20632       | MHAHH425-06           | GU155413                 |
| 2864              | Gorgythion begga pyralinaDHJ01 | Pyrginae         | 06-SRNP-41943       | MHAHI188-06           | GU155977                 |
| 2865              | Gorgythion begga pyralinaDHJ01 | Pyrginae         | 97-SRNP-5411        | MHAHJ234-07           | JF752798                 |
| 2866              | Gorgythion begga pyralinaDHJ01 | Pyrginae         | 00-SRNP-2146        | MHAHJ241-07           | JF752801                 |
| 2867              | Gorgythion begga pyralinaDHJ01 | Pyrginae         | 00-SRNP-2408        | MHAHJ243-07           | JF752802                 |
| 2868              | Gorgythion begga pyralinaDHJ01 | Pyrginae         | 99-SRNP-2221        | MHAHJ250-07           | JF752804                 |
| 2869              | Gorgythion begga pyralinaDHJ01 | Pyrginae         | 99-SRNP-15519       | MHAHJ255-07           | JF752806                 |
| 2870              | Gorgythion begga pyralinaDHJ01 | Pyrginae         | 00-SRNP-11026       | MHAHJ263-07           | JF752808                 |
| 2871              | Gorgythion begga pyralinaDHJ01 | Pyrginae         | 99-SRNP-15470       | MHAHJ264-07           | JF752809                 |
| 2872              | Gorgythion begga pyralinaDHJ01 | Pyrginae         | 00-SRNP-3210        | MHAHJ266-07           | JF752810                 |
| 2873              | Gorgythion begga pyralinaDHJ01 | Pyrginae         | 99-SRNP-4380        | MHAHJ267-07           | JF752811                 |
| 2874              | Gorgythion begga pyralinaDHJ01 | Pyrginae         | 98-SRNP-4012        | MHAHJ269-07           | JF752812                 |
| 2875              | Gorgythion begga pyralinaDHJ01 | Pyrginae         | 04-SRNP-50125       | MHMVG186-07           | JF760742                 |
| 2876              | Gorgythion begga pyralinaDHJ01 | Pyrginae         | 04-SRNP-14948       | MHMVG189-07           | JF760746                 |
| 2877              | Gorgythion begga pyralinaDHJ01 | Pyrginae         | 06-SRNP-1869        | MHAHG769-06           | GU151420                 |
| 2878              | Gorgythion begga pyralinaDHJ01 | Pyrginae         | 06-SRNP-1799        | MHAHG770-06           | GU151419                 |
| 2879              | Gorgythion begga pyralinaDHJ01 | Pyrginae         | 98-SRNP-4195        | MHAHJ271-07           | JF752813                 |
| 2880              | Gorgythion begga pyralinaDHJ01 | Pyrginae         | 04-SRNP-45528       | MHMVG182-07           | JF760745                 |
| 2881              | Gorgythion begga pyralinaDHJ01 | Pyrginae         | 04-SRNP-21113       | MHMVG190-07           | JF760739                 |
| 2882              | Gorgythion begga pyralinaDHJ01 | Pyrginae         | 04-SRNP-45237       | MHMVG192-07           | JF760741                 |
| 2883              | Gorgythion begga pyralinaDHJ01 | Pyrginae         | 07-SRNP-55339       | MHAHK284-07           | JF760747                 |
| 2884              | Gorgythion begga pyralinaDHJ01 | Pyrginae         | 08-SRNP-70487       | MHMXX1102-09          | JF777981                 |
| 2885              | Gorgythion begga pyralinaDHJ01 | Pyrginae         | 08-SRNP-45022       | MHMXX1106-09          | JF777982                 |
| 2886              | Gorgythion begga pyralinaDHJ01 | Pyrginae         | 08-SRNP-20764       | MHMXX1112-09          | JF777983                 |
| 2887              | Gorgythion begga pyralinaDHJ01 | Pyrginae         | 08-SRNP-30986       | MHMXX1113-09          | JF777984                 |
| 2888              | Gorgythion begga pyralinaDHJ01 | Pyrginae         | 08-SRNP-30987       | MHMXX1114-09          | JF777985                 |
| 2889              | Gorgythion begga pyralinaDHJ01 | Pyrginae         | 05-SRNP-24241       | MHAHF775-06           | GU150456                 |
| 2890              | Gorgythion begga pyralinaDHJ01 | Pyrginae         | 05-SRNP-24247       | MHAHF776-06           | GU150465                 |
| 2891              | Gorgythion begga pyralinaDHJ01 | Pyrginae         | 02-SRNP-32047       | CSRII621-05           | DQ292549                 |
| 2892              | Gorgythion begga pyralinaDHJ01 | Pyrginae         | 02-SRNP-2287        | CSRII620-05           | DQ292548                 |
| 2893              | Gorgythion begga pyralinaDHJ01 | Pyrginae         | 02-SRNP-32909       | CSRII615-05           | DQ292543                 |
| 2894              | Gorgythion begga pyralinaDHJ01 | Pyrginae         | 02-SRNP-5882        | CSRII614-05           | DQ292542                 |
| 2895              | Gorgythion begga pyralinaDHJ01 | Pyrginae         | 02-SRNP-13764       | CSRII612-05           | DQ292540                 |
| 2896              | Gorgythion begga pyralinaDHJ01 | Pyrginae         | 02-SRNP-5878        | CSRII611-05           | DQ292539                 |
| 2897              | Gorgythion begga pyralinaDHJ01 | Pyrginae         | 02-SRNP-14308       | CSRII605-05           | DQ292533                 |
| 2898              | Gorgythion begga pyralinaDHJ01 | Pyrginae         | 01-SRNP-4872        | CSRII735-05           | DQ292554                 |
| 2899              | Gorgythion begga pyralinaDHJ01 | Pyrginae         | 02-SRNP-13763       | CSRII603-05           | DQ292531                 |
| 2900              | Gorgythion begga pyralinaDHJ01 | Pyrginae         | 04-SRNP-15314       | MHMVG178-07           | JF760740                 |
| 2901              | Gorgythion begga pyralinaDHJ01 | Pyrginae         | 02-SRNP-2285        | CSRII198-04           | DQ292514                 |
| 2902              | Gorgythion begga pyralinaDHJ01 | Pyrginae         | 06-SRNP-30280       | MHAHG277-06           | GU151418                 |
| 2903              | Gorgythion begga pyralinaDHJ01 | Pyrginae         | 05-SRNP-206         | MHMVG185-07           | JF760743                 |
| 2904              | Gorgythion begga pyralinaDHJ01 | Pyrginae         | 06-SRNP-753         | MHAHG282-06           | GU151422                 |
| 2905              | Gorgythion begga pyralinaDHJ01 | Pyrginae         | 05-SRNP-23371       | MHAHF050-06           | GU150463                 |
| 2906              | Gorgythion begga pyralinaDHJ01 | Pyrginae         | 06-SRNP-1800        | MHAHG767-06           | GU151414                 |
| 2907              | Gorgythion begga pyralinaDHJ01 | Pyrginae         | 04-SRNP-27297       | MHAHF054-06           | GU150462                 |
| 2908              | Gorgythion begga pyralinaDHJ01 | Pyrginae         | 96-SRNP-886         | MHAHJ236-07           | JF752799                 |
| 2909              | Gorgythion begga pyralinaDHJ01 | Pyrginae         | 06-SRNP-30794       | MHAHG279-06           | GU151423                 |
| 2910              | Gorgythion begga pyralinaDHJ01 | Pyrginae         | 99-SRNP-322         | MHAHJ260-07           | JF752807                 |
| 2911              | Gorgythion begga pyralinaDHJ01 | Pyrginae         | 99-SRNP-298         | MHAHJ249-07           | JF752803                 |

| <b>Tree Order</b> | <b>Species</b>                 | <b>Subfamily</b> | <b>ACG Sampleid</b> | <b>BOLD Processid</b> | <b>Genbank Accession</b> |
|-------------------|--------------------------------|------------------|---------------------|-----------------------|--------------------------|
| 2912              | Gorgythion begga pyralinaDHJ01 | Pyrginae         | 96-SRNP-12038       | MHAHJ233-07           | JF752797                 |
| 2913              | Gorgythion begga pyralinaDHJ01 | Pyrginae         | 99-SRNP-2514        | MHAHJ252-07           | JF752805                 |
| 2914              | Gorgythion begga pyralinaDHJ01 | Pyrginae         | 06-SRNP-263         | MHMXA565-06           | JF760744                 |
| 2915              | Gorgythion begga pyralinaDHJ01 | Pyrginae         | 95-SRNP-6465        | MHAHJ237-07           | JF752800                 |
| 2916              | Gorgythion begga pyralinaDHJ01 | Pyrginae         | 03-SRNP-28548       | CSRII211-04           | DQ292527                 |
| 2917              | Gorgythion begga pyralinaDHJ01 | Pyrginae         | 02-SRNP-17248       | CSRII202-04           | DQ292518                 |
| 2918              | Gorgythion begga pyralinaDHJ01 | Pyrginae         | 92-SRNP-3165        | CSCR542-04            | DQ292513                 |
| 2919              | Gorgythion begga pyralinaDHJ01 | Pyrginae         | 07-SRNP-20992       | MHAHL176-07           | JF762262                 |
| 2920              | Gorgythion begga pyralinaDHJ01 | Pyrginae         | 07-SRNP-20948       | MHAHL179-07           | JF762264                 |
| 2921              | Gorgythion begga pyralinaDHJ01 | Pyrginae         | 08-SRNP-40557       | MHMXX1185-09          | JF777986                 |
| 2922              | Gorgythion begga pyralinaDHJ01 | Pyrginae         | 08-SRNP-70553       | MHMXX710-09           | JF777980                 |
| 2923              | Gorgythion begga pyralinaDHJ02 | Pyrginae         | 03-SRNP-1239        | CSRII205-04           | DQ292521                 |
| 2924              | Gorgythion begga pyralinaDHJ02 | Pyrginae         | 03-SRNP-20279       | CSRII206-04           | DQ292522                 |
| 2925              | Gorgythion begga pyralinaDHJ02 | Pyrginae         | 03-SRNP-1176        | CSRII204-04           | DQ292520                 |
| 2926              | Gorgythion begga pyralinaDHJ02 | Pyrginae         | 05-SRNP-33821       | MHAHF043-06           | GU150470                 |
| 2927              | Gorgythion begga pyralinaDHJ02 | Pyrginae         | 05-SRNP-33754       | MHAHF810-06           | GU150484                 |
| 2928              | Gorgythion begga pyralinaDHJ02 | Pyrginae         | 05-SRNP-33763       | MHAHF822-06           | GU150486                 |
| 2929              | Gorgythion begga pyralinaDHJ02 | Pyrginae         | 01-SRNP-17454       | CSRII738-05           | DQ292557                 |
| 2930              | Gorgythion begga pyralinaDHJ02 | Pyrginae         | 06-SRNP-40222       | MHMXA569-06           | JF760771                 |
| 2931              | Gorgythion begga pyralinaDHJ02 | Pyrginae         | 07-SRNP-55213       | MHAHK287-07           | JF760776                 |
| 2932              | Gorgythion begga pyralinaDHJ02 | Pyrginae         | 01-SRNP-1269        | CSRII734-05           | DQ292553                 |
| 2933              | Gorgythion begga pyralinaDHJ02 | Pyrginae         | 08-SRNP-20679       | MHMXX1105-09          | JF777991                 |
| 2934              | Gorgythion begga pyralinaDHJ02 | Pyrginae         | 08-SRNP-24442       | MHMYB160-09           | GU649682                 |
| 2935              | Gorgythion begga pyralinaDHJ02 | Pyrginae         | 07-SRNP-60837       | MHMXR052-08           | JF762271                 |
| 2936              | Gorgythion begga pyralinaDHJ02 | Pyrginae         | 08-SRNP-2157        | MHMXX1104-09          | JF777990                 |
| 2937              | Gorgythion begga pyralinaDHJ02 | Pyrginae         | 06-SRNP-19738       | MHMXI575-07           | JF760767                 |
| 2938              | Gorgythion begga pyralinaDHJ02 | Pyrginae         | 07-SRNP-55196       | MHAHK285-07           | JF760774                 |
| 2939              | Gorgythion begga pyralinaDHJ02 | Pyrginae         | 99-SRNP-2400        | MHAHJ257-07           | JF752832                 |
| 2940              | Gorgythion begga pyralinaDHJ02 | Pyrginae         | 98-SRNP-4745        | MHAHJ261-07           | JF752835                 |
| 2941              | Gorgythion begga pyralinaDHJ02 | Pyrginae         | 00-SRNP-2145        | MHAHJ265-07           | JF752837                 |
| 2942              | Gorgythion begga pyralinaDHJ02 | Pyrginae         | 98-SRNP-13474       | MHAHJ270-07           | JF752839                 |
| 2943              | Gorgythion begga pyralinaDHJ02 | Pyrginae         | 06-SRNP-42907       | MHAHJ434-07           | JF752841                 |
| 2944              | Gorgythion begga pyralinaDHJ02 | Pyrginae         | 06-SRNP-22800       | MHAHJ475-07           | JF752842                 |
| 2945              | Gorgythion begga pyralinaDHJ02 | Pyrginae         | 04-SRNP-42567       | MHMXXG177-07          | JF760750                 |
| 2946              | Gorgythion begga pyralinaDHJ02 | Pyrginae         | 04-SRNP-41839       | MHMXXG193-07          | JF760757                 |
| 2947              | Gorgythion begga pyralinaDHJ02 | Pyrginae         | 06-SRNP-57189       | MHAHI189-06           | GU155979                 |
| 2948              | Gorgythion begga pyralinaDHJ02 | Pyrginae         | 06-SRNP-57188       | MHAHI191-06           | GU155978                 |
| 2949              | Gorgythion begga pyralinaDHJ02 | Pyrginae         | 97-SRNP-127         | MHAHJ232-07           | JF752817                 |
| 2950              | Gorgythion begga pyralinaDHJ02 | Pyrginae         | 02-SRNP-14120       | MHAHJ246-07           | JF752825                 |
| 2951              | Gorgythion begga pyralinaDHJ02 | Pyrginae         | 06-SRNP-30444       | MHAHG276-06           | GU151429                 |
| 2952              | Gorgythion begga pyralinaDHJ02 | Pyrginae         | 06-SRNP-30443       | MHAHG278-06           | GU151425                 |
| 2953              | Gorgythion begga pyralinaDHJ02 | Pyrginae         | 05-SRNP-65607       | MHAHF785-06           | GU150483                 |
| 2954              | Gorgythion begga pyralinaDHJ02 | Pyrginae         | 05-SRNP-66197       | MHAHF786-06           | GU150481                 |
| 2955              | Gorgythion begga pyralinaDHJ02 | Pyrginae         | 05-SRNP-30599       | MHAHF052-06           | GU150478                 |
| 2956              | Gorgythion begga pyralinaDHJ02 | Pyrginae         | 05-SRNP-2471        | MHAHF059-06           | GU150476                 |
| 2957              | Gorgythion begga pyralinaDHJ02 | Pyrginae         | 06-SRNP-22074       | MHAHJ688-07           | JF752843                 |
| 2958              | Gorgythion begga pyralinaDHJ02 | Pyrginae         | 06-SRNP-65353       | MHAHJ690-07           | JF752845                 |
| 2959              | Gorgythion begga pyralinaDHJ02 | Pyrginae         | 07-SRNP-42322       | MHMXP211-08           | JF762274                 |
| 2960              | Gorgythion begga pyralinaDHJ02 | Pyrginae         | 07-SRNP-42321       | MHMXP212-08           | JF762273                 |
| 2961              | Gorgythion begga pyralinaDHJ02 | Pyrginae         | 06-SRNP-30986       | MHAHG764-06           | GU151428                 |
| 2962              | Gorgythion begga pyralinaDHJ02 | Pyrginae         | 06-SRNP-31171       | MHAHG765-06           | GU151427                 |
| 2963              | Gorgythion begga pyralinaDHJ02 | Pyrginae         | 05-SRNP-33765       | MHAHF821-06           | GU150487                 |
| 2964              | Gorgythion begga pyralinaDHJ02 | Pyrginae         | 05-SRNP-33759       | MHAHF825-06           | GU150489                 |
| 2965              | Gorgythion begga pyralinaDHJ02 | Pyrginae         | 02-SRNP-5740        | CSRII619-05           | DQ292547                 |
| 2966              | Gorgythion begga pyralinaDHJ02 | Pyrginae         | 02-SRNP-5307        | CSRII618-05           | DQ292546                 |
| 2967              | Gorgythion begga pyralinaDHJ02 | Pyrginae         | 02-SRNP-5972        | CSRII613-05           | DQ292541                 |

| <b>Tree Order</b> | <b>Species</b>                 | <b>Subfamily</b> | <b>ACG Sampleid</b> | <b>BOLD Processid</b> | <b>Genbank Accession</b> |
|-------------------|--------------------------------|------------------|---------------------|-----------------------|--------------------------|
| 2968              | Gorgythion begga pyralinaDHJ02 | Pyrginae         | 02-SRNP-4537        | CSRII610-05           | DQ292538                 |
| 2969              | Gorgythion begga pyralinaDHJ02 | Pyrginae         | 02-SRNP-5739        | CSRII609-05           | DQ292537                 |
| 2970              | Gorgythion begga pyralinaDHJ02 | Pyrginae         | 02-SRNP-33710       | CSRII608-05           | DQ292536                 |
| 2971              | Gorgythion begga pyralinaDHJ02 | Pyrginae         | 01-SRNP-9221        | CSRII736-05           | DQ292555                 |
| 2972              | Gorgythion begga pyralinaDHJ02 | Pyrginae         | 02-SRNP-2286        | CSRII606-05           | DQ292534                 |
| 2973              | Gorgythion begga pyralinaDHJ02 | Pyrginae         | 01-SRNP-1270        | CSRII733-05           | DQ292552                 |
| 2974              | Gorgythion begga pyralinaDHJ02 | Pyrginae         | 01-SRNP-17453       | CSRII732-05           | DQ292551                 |
| 2975              | Gorgythion begga pyralinaDHJ02 | Pyrginae         | 01-SRNP-15739       | CSRII731-05           | DQ292550                 |
| 2976              | Gorgythion begga pyralinaDHJ02 | Pyrginae         | 02-SRNP-27923       | MHAHJ245-07           | JF752824                 |
| 2977              | Gorgythion begga pyralinaDHJ02 | Pyrginae         | 04-SRNP-41616       | MHMXXG194-07          | JF760756                 |
| 2978              | Gorgythion begga pyralinaDHJ02 | Pyrginae         | 03-SRNP-21505       | CSRII209-04           | DQ292525                 |
| 2979              | Gorgythion begga pyralinaDHJ02 | Pyrginae         | 06-SRNP-23305       | MHAHJ433-07           | JF752840                 |
| 2980              | Gorgythion begga pyralinaDHJ02 | Pyrginae         | 08-SRNP-65479       | MHMXX1107-09          | JF777992                 |
| 2981              | Gorgythion begga pyralinaDHJ02 | Pyrginae         | 08-SRNP-4702        | MHMXX597-09           | JF777988                 |
| 2982              | Gorgythion begga pyralinaDHJ02 | Pyrginae         | 05-SRNP-66163       | MHAHF682-06           | GU150491                 |
| 2983              | Gorgythion begga pyralinaDHJ02 | Pyrginae         | 05-SRNP-40934       | MHAHF042-06           | GU150475                 |
| 2984              | Gorgythion begga pyralinaDHJ02 | Pyrginae         | 02-SRNP-15032       | CSRII604-05           | DQ292532                 |
| 2985              | Gorgythion begga pyralinaDHJ02 | Pyrginae         | 07-SRNP-31672       | MHAHL183-07           | JF762267                 |
| 2986              | Gorgythion begga pyralinaDHJ02 | Pyrginae         | 07-SRNP-65124       | MHAHL181-07           | JF762266                 |
| 2987              | Gorgythion begga pyralinaDHJ02 | Pyrginae         | 05-SRNP-33764       | MHMXI581-07           | JF760761                 |
| 2988              | Gorgythion begga pyralinaDHJ02 | Pyrginae         | 03-SRNP-28550       | CSRII212-04           | DQ292528                 |
| 2989              | Gorgythion begga pyralinaDHJ02 | Pyrginae         | 98-SRNP-4629        | MHAHJ247-07           | JF752826                 |
| 2990              | Gorgythion begga pyralinaDHJ02 | Pyrginae         | 99-SRNP-2220        | MHAHJ268-07           | JF752838                 |
| 2991              | Gorgythion begga pyralinaDHJ02 | Pyrginae         | 98-SRNP-4280        | MHAHJ262-07           | JF752836                 |
| 2992              | Gorgythion begga pyralinaDHJ02 | Pyrginae         | 99-SRNP-2219        | MHAHJ259-07           | JF752834                 |
| 2993              | Gorgythion begga pyralinaDHJ02 | Pyrginae         | 02-SRNP-14184       | MHAHJ244-07           | JF752823                 |
| 2994              | Gorgythion begga pyralinaDHJ02 | Pyrginae         | 05-SRNP-41201       | MHAHF044-06           | GU150473                 |
| 2995              | Gorgythion begga pyralinaDHJ02 | Pyrginae         | 95-SRNP-7044        | MHAHJ235-07           | JF752818                 |
| 2996              | Gorgythion begga pyralinaDHJ02 | Pyrginae         | 06-SRNP-40632       | MHMXA566-06           | JF760763                 |
| 2997              | Gorgythion begga pyralinaDHJ02 | Pyrginae         | 95-SRNP-6166        | MHAHJ229-07           | JF752814                 |
| 2998              | Gorgythion begga pyralinaDHJ02 | Pyrginae         | 06-SRNP-30946       | MHAHG763-06           | GU151426                 |
| 2999              | Gorgythion begga pyralinaDHJ02 | Pyrginae         | 05-SRNP-40817       | MHAHF051-06           | GU150480                 |
| 3000              | Gorgythion begga pyralinaDHJ02 | Pyrginae         | 96-SRNP-9689        | MHAHJ230-07           | JF752815                 |
| 3001              | Gorgythion begga pyralinaDHJ02 | Pyrginae         | 97-SRNP-5666        | MHAHJ239-07           | JF752820                 |
| 3002              | Gorgythion begga pyralinaDHJ02 | Pyrginae         | 99-SRNP-3525        | MHAHJ258-07           | JF752833                 |
| 3003              | Gorgythion begga pyralinaDHJ02 | Pyrginae         | 03-SRNP-21608       | CSRII210-04           | DQ292526                 |
| 3004              | Gorgythion begga pyralinaDHJ02 | Pyrginae         | 02-SRNP-5088        | CSRII199-04           | DQ292515                 |
| 3005              | Gorgythion begga pyralinaDHJ02 | Pyrginae         | 98-SRNP-4756        | MHAHJ248-07           | JF752827                 |
| 3006              | Gorgythion begga pyralinaDHJ02 | Pyrginae         | 04-SRNP-43161       | MHMXXG176-07          | JF760752                 |
| 3007              | Gorgythion begga pyralinaDHJ02 | Pyrginae         | 97-SRNP-380         | MHAHJ238-07           | JF752819                 |
| 3008              | Gorgythion begga pyralinaDHJ02 | Pyrginae         | 05-SRNP-32342       | MHAHF036-06           | GU150468                 |
| 3009              | Gorgythion begga pyralinaDHJ02 | Pyrginae         | 97-SRNP-11537       | MHAHJ231-07           | JF752816                 |
| 3010              | Gorgythion begga pyralinaDHJ02 | Pyrginae         | 00-SRNP-2655        | MHAHJ253-07           | JF752829                 |
| 3011              | Gorgythion begga pyralinaDHJ02 | Pyrginae         | 08-SRNP-40397       | MHMXT193-08           | JF762270                 |
| 3012              | Gorgythion begga pyralinaDHJ02 | Pyrginae         | 08-SRNP-40417       | MHMXT195-08           | JF762268                 |
| 3013              | Gorgythion begga pyralinaDHJ02 | Pyrginae         | 93-SRNP-7034        | MHMYD751-09           |                          |
| 3014              | Gorgythion begga pyralinaDHJ02 | Pyrginae         | 03-SRNP-20828       | CSRII207-04           | DQ292523                 |
| 3015              | Gorgythion begga pyralinaDHJ02 | Pyrginae         | 05-SRNP-30971       | MHAHF041-06           | GU150474                 |
| 3016              | Gorgythion begga pyralinaDHJ02 | Pyrginae         | 07-SRNP-23849       | MHMXR050-08           | JF762272                 |
| 3017              | Gorgythion begga pyralinaDHJ02 | Pyrginae         | 06-SRNP-59585       | MHMXXH888-07          | JF760769                 |
| 3018              | Gorgythion begga pyralinaDHJ02 | Pyrginae         | 06-SRNP-59797       | MHMXXH884-07          | JF760751                 |
| 3019              | Gorgythion begga pyralinaDHJ02 | Pyrginae         | 06-SRNP-59614       | MHMXXH883-07          | JF760755                 |
| 3020              | Gorgythion begga pyralinaDHJ02 | Pyrginae         | 06-SRNP-43424       | MHAHJ691-07           | JF752846                 |
| 3021              | Gorgythion begga pyralinaDHJ02 | Pyrginae         | 06-SRNP-22111       | MHAHJ689-07           | JF752844                 |
| 3022              | Gorgythion begga pyralinaDHJ02 | Pyrginae         | 04-SRNP-30434       | MHMXXG196-07          | JF760753                 |
| 3023              | Gorgythion begga pyralinaDHJ02 | Pyrginae         | 04-SRNP-40895       | MHMXXG191-07          | JF760758                 |

| Tree Order | Species                        | Subfamily | ACG Sampleid  | BOLD Processid | Genbank Accession |
|------------|--------------------------------|-----------|---------------|----------------|-------------------|
| 3024       | Gorgythion begga pyralinaDHJ02 | Pyrginae  | 04-SRNP-35213 | MHMVG187-07    | JF760760          |
| 3025       | Gorgythion begga pyralinaDHJ02 | Pyrginae  | 04-SRNP-15268 | MHMVG181-07    | JF760766          |
| 3026       | Gorgythion begga pyralinaDHJ02 | Pyrginae  | 04-SRNP-33308 | MHMVG180-07    | JF760768          |
| 3027       | Gorgythion begga pyralinaDHJ02 | Pyrginae  | 00-SRNP-6011  | MHAHJ256-07    | JF752831          |
| 3028       | Gorgythion begga pyralinaDHJ02 | Pyrginae  | 00-SRNP-2364  | MHAHJ254-07    | JF752830          |
| 3029       | Gorgythion begga pyralinaDHJ02 | Pyrginae  | 97-SRNP-10376 | MHAHJ251-07    | JF752828          |
| 3030       | Gorgythion begga pyralinaDHJ02 | Pyrginae  | 00-SRNP-2182  | MHAHJ242-07    | JF752822          |
| 3031       | Gorgythion begga pyralinaDHJ02 | Pyrginae  | 00-SRNP-2038  | MHAHJ240-07    | JF752821          |
| 3032       | Gorgythion begga pyralinaDHJ02 | Pyrginae  | 06-SRNP-41729 | MHAHH424-06    | GU155414          |
| 3033       | Gorgythion begga pyralinaDHJ02 | Pyrginae  | 06-SRNP-30448 | MHMVA570-06    | JF760770          |
| 3034       | Gorgythion begga pyralinaDHJ02 | Pyrginae  | 06-SRNP-30751 | MHMVA568-06    | JF760759          |
| 3035       | Gorgythion begga pyralinaDHJ02 | Pyrginae  | 06-SRNP-30445 | MHMVA567-06    | JF760762          |
| 3036       | Gorgythion begga pyralinaDHJ02 | Pyrginae  | 06-SRNP-30942 | MHAHG280-06    | GU151430          |
| 3037       | Gorgythion begga pyralinaDHJ02 | Pyrginae  | 05-SRNP-33753 | MHAHF824-06    | GU150490          |
| 3038       | Gorgythion begga pyralinaDHJ02 | Pyrginae  | 05-SRNP-33752 | MHAHF823-06    | GU150488          |
| 3039       | Gorgythion begga pyralinaDHJ02 | Pyrginae  | 05-SRNP-33272 | MHAHF783-06    | GU150482          |
| 3040       | Gorgythion begga pyralinaDHJ02 | Pyrginae  | 05-SRNP-30970 | MHAHF058-06    | GU150479          |
| 3041       | Gorgythion begga pyralinaDHJ02 | Pyrginae  | 05-SRNP-31860 | MHAHF038-06    | GU150471          |
| 3042       | Gorgythion begga pyralinaDHJ02 | Pyrginae  | 02-SRNP-21092 | CSRII617-05    | DQ292545          |
| 3043       | Gorgythion begga pyralinaDHJ02 | Pyrginae  | 02-SRNP-33944 | CSRII616-05    | DQ292544          |
| 3044       | Gorgythion begga pyralinaDHJ02 | Pyrginae  | 02-SRNP-19850 | CSRII607-05    | DQ292535          |
| 3045       | Gorgythion begga pyralinaDHJ02 | Pyrginae  | 02-SRNP-5107  | CSRII602-05    | DQ292530          |
| 3046       | Gorgythion begga pyralinaDHJ02 | Pyrginae  | 02-SRNP-27777 | CSRII601-05    | DQ292529          |
| 3047       | Gorgythion begga pyralinaDHJ02 | Pyrginae  | 07-SRNP-55244 | MHAHK283-07    | JF760773          |
| 3048       | Gorgythion begga pyralinaDHJ02 | Pyrginae  | 07-SRNP-55198 | MHAHK286-07    | JF760775          |
| 3049       | Gorgythion begga pyralinaDHJ02 | Pyrginae  | 05-SRNP-31861 | MHAHF037-06    | GU150472          |
| 3050       | Gorgythion begga pyralinaDHJ02 | Pyrginae  | 04-SRNP-43162 | MHMVG184-07    | JF760764          |
| 3051       | Gorgythion begga pyralinaDHJ02 | Pyrginae  | 05-SRNP-30226 | MHMVG183-07    | JF760765          |
| 3052       | Gorgythion begga pyralinaDHJ02 | Pyrginae  | 06-SRNP-57350 | MHAHI192-06    | GU155980          |
| 3053       | Gorgythion begga pyralinaDHJ02 | Pyrginae  | 05-SRNP-30688 | MHAHF053-06    | GU150477          |
| 3054       | Gorgythion begga pyralinaDHJ02 | Pyrginae  | 02-SRNP-14229 | CSCR541-04     | DQ292512          |
| 3055       | Gorgythion begga pyralinaDHJ02 | Pyrginae  | 02-SRNP-13839 | CSRII200-04    | DQ292516          |
| 3056       | Gorgythion begga pyralinaDHJ02 | Pyrginae  | 04-SRNP-56552 | MHMVG188-07    | JF760772          |
| 3057       | Gorgythion begga pyralinaDHJ02 | Pyrginae  | 07-SRNP-41296 | MHAHL180-07    | JF762265          |
| 3058       | Gorgythion begga pyralinaDHJ02 | Pyrginae  | 08-SRNP-40399 | MHMXT194-08    | JF762269          |
| 3059       | Gorgythion begga pyralinaDHJ02 | Pyrginae  | 08-SRNP-70432 | MHMXX1103-09   | JF777989          |
| 3060       | Gorgythion begga pyralinaDHJ02 | Pyrginae  | 08-SRNP-1816  | MHMXX1108-09   | JF777993          |
| 3061       | Gorgythion begga pyralinaDHJ02 | Pyrginae  | 08-SRNP-30607 | MHMXX1110-09   | JF777995          |
| 3062       | Gorgythion begga pyralinaDHJ02 | Pyrginae  | 08-SRNP-20433 | MHMXX1111-09   | JF777996          |
| 3063       | Gorgythion begga pyralinaDHJ02 | Pyrginae  | 08-SRNP-30605 | MHMXX1115-09   | JF777997          |
| 3064       | Gorgythion begga pyralinaDHJ02 | Pyrginae  | 08-SRNP-30606 | MHMXX1116-09   | JF777998          |
| 3065       | Gorgythion begga pyralinaDHJ02 | Pyrginae  | 08-SRNP-22577 | MHMXX596-09    | JF777987          |
| 3066       | Gorgythion begga pyralinaDHJ02 | Pyrginae  | 08-SRNP-24676 | MHMYB159-09    | GU649681          |
| 3067       | Gorgythion begga pyralinaDHJ02 | Pyrginae  | 09-SRNP-72858 | MHMYE1549-09   | HM391109          |
| 3068       | Gorgythion begga pyralinaDHJ02 | Pyrginae  | 06-SRNP-60373 | MHAHK288-07    | JF760777          |
| 3069       | Gorgythion begga pyralinaDHJ02 | Pyrginae  | 04-SRNP-42979 | MHMVG195-07    | JF760754          |
| 3070       | Gorgythion begga pyralinaDHJ02 | Pyrginae  | 05-SRNP-66115 | MHAHF787-06    | GU150485          |
| 3071       | Gorgythion begga pyralinaDHJ02 | Pyrginae  | 05-SRNP-41039 | MHAHF056-06    | GU150467          |
| 3072       | Gorgythion begga pyralinaDHJ02 | Pyrginae  | 03-SRNP-21087 | CSRII208-04    | DQ292524          |
| 3073       | Gorgythion begga pyralinaDHJ02 | Pyrginae  | 06-SRNP-30446 | MHMVA571-06    | JF760748          |
| 3074       | Gorgythion begga pyralinaDHJ02 | Pyrginae  | 04-SRNP-60168 | MHMVG179-07    | JF760749          |
| 3075       | Gorgythion begga pyralinaDHJ02 | Pyrginae  | 05-SRNP-20969 | MHAHF057-06    | GU150469          |
| 3076       | Gorgythion begga pyralinaDHJ02 | Pyrginae  | 08-SRNP-65113 | MHMXX1109-09   | JF777994          |
| 3077       | Gorgythion begga pyralinaDHJ02 | Pyrginae  | 09-SRNP-66079 | MHMYI654-10    | HQ963966          |
| 3078       | Telemiades fides               | Pyrginae  | 07-SRNP-16611 | MHMXX722-09    | JF778534          |
| 3079       | Telemiades fides               | Pyrginae  | 05-SRNP-55775 | MHAHF939-06    | GU150916          |

| <b>Tree Order</b> | <b>Species</b>   | <b>Subfamily</b> | <b>ACG Sampleid</b> | <b>BOLD Processid</b> | <b>Genbank<br/>Accession</b> |
|-------------------|------------------|------------------|---------------------|-----------------------|------------------------------|
| 3080              | Telemiades fides | Pyrginae         | 08-SRNP-65257       | MHMWX260-09           | JF754304                     |
| 3081              | Telemiades fides | Pyrginae         | 02-SRNP-14055       | CSRII681-05           | DQ293552                     |
| 3082              | Telemiades fides | Pyrginae         | 07-SRNP-23507       | MHMXR597-08           | JF763181                     |
| 3083              | Telemiades fides | Pyrginae         | 05-SRNP-13191       | MHAHF566-06           | GU150912                     |
| 3084              | Telemiades fides | Pyrginae         | 07-SRNP-65513       | MHMXR596-08           | JF763182                     |
| 3085              | Telemiades fides | Pyrginae         | 07-SRNP-61381       | MHMWX223-09           | JF754270                     |
| 3086              | Telemiades fides | Pyrginae         | 07-SRNP-60109       | MHMXR576-08           | JF763200                     |
| 3087              | Telemiades fides | Pyrginae         | 07-SRNP-21983       | MHAHL507-07           | JF763151                     |
| 3088              | Telemiades fides | Pyrginae         | 07-SRNP-65137       | MHAHL506-07           | JF763150                     |
| 3089              | Telemiades fides | Pyrginae         | 07-SRNP-31688       | MHAHL496-07           | JF763142                     |
| 3090              | Telemiades fides | Pyrginae         | 07-SRNP-31687       | MHAHL493-07           | JF763140                     |
| 3091              | Telemiades fides | Pyrginae         | 07-SRNP-21628       | MHAHL484-07           | JF763134                     |
| 3092              | Telemiades fides | Pyrginae         | 07-SRNP-20486       | MHAHK342-07           | JF761214                     |
| 3093              | Telemiades fides | Pyrginae         | 07-SRNP-21257       | MHAHK339-07           | JF761211                     |
| 3094              | Telemiades fides | Pyrginae         | 06-SRNP-60265       | MHAHK336-07           | JF761208                     |
| 3095              | Telemiades fides | Pyrginae         | 02-SRNP-3677        | CSRII680-05           | DQ293551                     |
| 3096              | Telemiades fides | Pyrginae         | 07-SRNP-5104        | MHMXS002-08           | JF763176                     |
| 3097              | Telemiades fides | Pyrginae         | 07-SRNP-31870       | MHAHL491-07           | JF763139                     |
| 3098              | Telemiades fides | Pyrginae         | 07-SRNP-65687       | MHMXR599-08           | JF763179                     |
| 3099              | Telemiades fides | Pyrginae         | 03-SRNP-1234        | CSCR427-04            | DQ293542                     |
| 3100              | Telemiades fides | Pyrginae         | 02-SRNP-4033        | CSRII694-05           | DQ293565                     |
| 3101              | Telemiades fides | Pyrginae         | 07-SRNP-3685        | MHMXX0922-08          | JF763212                     |
| 3102              | Telemiades fides | Pyrginae         | 02-SRNP-17931       | CSRII676-05           | DQ293548                     |
| 3103              | Telemiades fides | Pyrginae         | 07-SRNP-31873       | MHAHL497-07           | JF763143                     |
| 3104              | Telemiades fides | Pyrginae         | 08-SRNP-45092       | MHMWX214-09           | JF754261                     |
| 3105              | Telemiades fides | Pyrginae         | 08-SRNP-24174       | MHMYB148-09           |                              |
| 3106              | Telemiades fides | Pyrginae         | 05-SRNP-55645       | MHAHF935-06           | GU150910                     |
| 3107              | Telemiades fides | Pyrginae         | 07-SRNP-3734        | MHMXX0913-08          | JF763215                     |
| 3108              | Telemiades fides | Pyrginae         | 07-SRNP-3520        | MHMXX0920-08          | JF763213                     |
| 3109              | Telemiades fides | Pyrginae         | 05-SRNP-55619       | MHAHF938-06           | GU150920                     |
| 3110              | Telemiades fides | Pyrginae         | 07-SRNP-32190       | MHAHK338-07           | JF761210                     |
| 3111              | Telemiades fides | Pyrginae         | 02-SRNP-10030       | CSRII678-05           | DQ293549                     |
| 3112              | Telemiades fides | Pyrginae         | 07-SRNP-31486       | MHAHL490-07           | JF763138                     |
| 3113              | Telemiades fides | Pyrginae         | 05-SRNP-13188       | MHAHF565-06           | GU150913                     |
| 3114              | Telemiades fides | Pyrginae         | 07-SRNP-55335       | MHAHK343-07           | JF761215                     |
| 3115              | Telemiades fides | Pyrginae         | 07-SRNP-55240       | MHAHK344-07           | JF761216                     |
| 3116              | Telemiades fides | Pyrginae         | 07-SRNP-55110       | MHAHK346-07           | JF761218                     |
| 3117              | Telemiades fides | Pyrginae         | 07-SRNP-1307        | MHAHK347-07           | JF761219                     |
| 3118              | Telemiades fides | Pyrginae         | 07-SRNP-55464       | MHAHK349-07           | JF761220                     |
| 3119              | Telemiades fides | Pyrginae         | 07-SRNP-55163       | MHAHK350-07           | JF761221                     |
| 3120              | Telemiades fides | Pyrginae         | 07-SRNP-1762        | MHAHL477-07           | JF763127                     |
| 3121              | Telemiades fides | Pyrginae         | 07-SRNP-21361       | MHAHL478-07           | JF763128                     |
| 3122              | Telemiades fides | Pyrginae         | 07-SRNP-21318       | MHAHL479-07           | JF763129                     |
| 3123              | Telemiades fides | Pyrginae         | 07-SRNP-21194       | MHAHL480-07           | JF763130                     |
| 3124              | Telemiades fides | Pyrginae         | 07-SRNP-20999       | MHAHL481-07           | JF763131                     |
| 3125              | Telemiades fides | Pyrginae         | 07-SRNP-21302       | MHAHL482-07           | JF763132                     |
| 3126              | Telemiades fides | Pyrginae         | 07-SRNP-21275       | MHAHL483-07           | JF763133                     |
| 3127              | Telemiades fides | Pyrginae         | 07-SRNP-21243       | MHAHL485-07           | JF763135                     |
| 3128              | Telemiades fides | Pyrginae         | 07-SRNP-21453       | MHAHL486-07           | JF763136                     |
| 3129              | Telemiades fides | Pyrginae         | 07-SRNP-65185       | MHAHL488-07           | JF763137                     |
| 3130              | Telemiades fides | Pyrginae         | 07-SRNP-20827       | MHAHL498-07           | JF763144                     |
| 3131              | Telemiades fides | Pyrginae         | 07-SRNP-31658       | MHAHL499-07           | JF763145                     |
| 3132              | Telemiades fides | Pyrginae         | 07-SRNP-30815       | MHAHL500-07           | JF763146                     |
| 3133              | Telemiades fides | Pyrginae         | 07-SRNP-57095       | MHAHL502-07           | JF763147                     |
| 3134              | Telemiades fides | Pyrginae         | 07-SRNP-2224        | MHAHL504-07           | JF763148                     |
| 3135              | Telemiades fides | Pyrginae         | 07-SRNP-56685       | MHAHL505-07           | JF763149                     |



| <b>Tree Order</b> | <b>Species</b>   | <b>Subfamily</b> | <b>ACG Sampleid</b> | <b>BOLD Processid</b> | <b>Genbank Accession</b> |
|-------------------|------------------|------------------|---------------------|-----------------------|--------------------------|
| 3136              | Telemiades fides | Pyrginae         | 07-SRNP-31298       | MHAHL509-07           | JF763152                 |
| 3137              | Telemiades fides | Pyrginae         | 07-SRNP-3731        | MHMXO914-08           | JF763214                 |
| 3138              | Telemiades fides | Pyrginae         | 07-SRNP-3500        | MHMXO924-08           | JF763210                 |
| 3139              | Telemiades fides | Pyrginae         | 07-SRNP-3567        | MHMXO934-08           | JF763206                 |
| 3140              | Telemiades fides | Pyrginae         | 07-SRNP-3838        | MHMXR570-08           | JF763205                 |
| 3141              | Telemiades fides | Pyrginae         | 07-SRNP-65761       | MHMXR572-08           | JF763203                 |
| 3142              | Telemiades fides | Pyrginae         | 07-SRNP-4407        | MHMXR578-08           | JF763199                 |
| 3143              | Telemiades fides | Pyrginae         | 07-SRNP-4674        | MHMXR579-08           | JF763198                 |
| 3144              | Telemiades fides | Pyrginae         | 07-SRNP-59719       | MHMXR580-08           | JF763197                 |
| 3145              | Telemiades fides | Pyrginae         | 07-SRNP-65688       | MHMXR581-08           | JF763196                 |
| 3146              | Telemiades fides | Pyrginae         | 07-SRNP-65514       | MHMXR582-08           | JF763195                 |
| 3147              | Telemiades fides | Pyrginae         | 07-SRNP-65511       | MHMXR583-08           | JF763194                 |
| 3148              | Telemiades fides | Pyrginae         | 07-SRNP-65572       | MHMXR584-08           | JF763193                 |
| 3149              | Telemiades fides | Pyrginae         | 07-SRNP-59610       | MHMXR585-08           | JF763192                 |
| 3150              | Telemiades fides | Pyrginae         | 07-SRNP-20495       | MHMXR586-08           | JF763191                 |
| 3151              | Telemiades fides | Pyrginae         | 07-SRNP-3892        | MHMXR588-08           | JF763190                 |
| 3152              | Telemiades fides | Pyrginae         | 07-SRNP-4701        | MHMXR589-08           | JF763189                 |
| 3153              | Telemiades fides | Pyrginae         | 07-SRNP-4102        | MHMXR590-08           | JF763188                 |
| 3154              | Telemiades fides | Pyrginae         | 07-SRNP-33424       | MHMXR591-08           | JF763187                 |
| 3155              | Telemiades fides | Pyrginae         | 07-SRNP-3891        | MHMXR592-08           | JF763186                 |
| 3156              | Telemiades fides | Pyrginae         | 07-SRNP-3839        | MHMXR593-08           | JF763185                 |
| 3157              | Telemiades fides | Pyrginae         | 07-SRNP-3983        | MHMXR594-08           | JF763184                 |
| 3158              | Telemiades fides | Pyrginae         | 07-SRNP-4100        | MHMXR595-08           | JF763183                 |
| 3159              | Telemiades fides | Pyrginae         | 07-SRNP-65718       | MHMXR598-08           | JF763180                 |
| 3160              | Telemiades fides | Pyrginae         | 07-SRNP-5003        | MHMXS004-08           | JF763174                 |
| 3161              | Telemiades fides | Pyrginae         | 07-SRNP-5103        | MHMXS005-08           | JF763173                 |
| 3162              | Telemiades fides | Pyrginae         | 07-SRNP-5105        | MHMXS006-08           | JF763172                 |
| 3163              | Telemiades fides | Pyrginae         | 07-SRNP-5174        | MHMXS007-08           | JF763171                 |
| 3164              | Telemiades fides | Pyrginae         | 08-SRNP-551         | MHMXS008-08           | JF763170                 |
| 3165              | Telemiades fides | Pyrginae         | 07-SRNP-5111        | MHMXS010-08           | JF763168                 |
| 3166              | Telemiades fides | Pyrginae         | 07-SRNP-5168        | MHMXS011-08           | JF763167                 |
| 3167              | Telemiades fides | Pyrginae         | 07-SRNP-3984        | MHMXS013-08           | JF763165                 |
| 3168              | Telemiades fides | Pyrginae         | 07-SRNP-42715       | MHMXS014-08           | JF763164                 |
| 3169              | Telemiades fides | Pyrginae         | 07-SRNP-4405        | MHMXS015-08           | JF763163                 |
| 3170              | Telemiades fides | Pyrginae         | 07-SRNP-3835        | MHMXS016-08           | JF763162                 |
| 3171              | Telemiades fides | Pyrginae         | 07-SRNP-4291        | MHMXS017-08           | JF763161                 |
| 3172              | Telemiades fides | Pyrginae         | 07-SRNP-5162        | MHMXS018-08           | JF763160                 |
| 3173              | Telemiades fides | Pyrginae         | 07-SRNP-4770        | MHMXS019-08           | JF763159                 |
| 3174              | Telemiades fides | Pyrginae         | 08-SRNP-129         | MHMXS025-08           | JF763154                 |
| 3175              | Telemiades fides | Pyrginae         | 07-SRNP-5139        | MHMXS026-08           | JF763153                 |
| 3176              | Telemiades fides | Pyrginae         | 07-SRNP-46433       | MHMXS021-08           | JF763158                 |
| 3177              | Telemiades fides | Pyrginae         | 07-SRNP-4902        | MHMXS022-08           | JF763157                 |
| 3178              | Telemiades fides | Pyrginae         | 08-SRNP-1791        | MHMXW184-09           | JF754233                 |
| 3179              | Telemiades fides | Pyrginae         | 08-SRNP-20925       | MHMXW185-09           | JF754234                 |
| 3180              | Telemiades fides | Pyrginae         | 08-SRNP-20965       | MHMXW186-09           | JF754235                 |
| 3181              | Telemiades fides | Pyrginae         | 08-SRNP-21076       | MHMXW187-09           | JF754236                 |
| 3182              | Telemiades fides | Pyrginae         | 08-SRNP-21078       | MHMXW188-09           | JF754237                 |
| 3183              | Telemiades fides | Pyrginae         | 08-SRNP-20956       | MHMXW189-09           | JF754238                 |
| 3184              | Telemiades fides | Pyrginae         | 08-SRNP-21028       | MHMXW190-09           | JF754239                 |
| 3185              | Telemiades fides | Pyrginae         | 08-SRNP-21036       | MHMXW191-09           | JF754240                 |
| 3186              | Telemiades fides | Pyrginae         | 08-SRNP-21077       | MHMXW192-09           | JF754241                 |
| 3187              | Telemiades fides | Pyrginae         | 08-SRNP-21084       | MHMXW193-09           | JF754242                 |
| 3188              | Telemiades fides | Pyrginae         | 08-SRNP-20967       | MHMXW194-09           | JF754243                 |
| 3189              | Telemiades fides | Pyrginae         | 08-SRNP-21070       | MHMXW195-09           | JF754244                 |
| 3190              | Telemiades fides | Pyrginae         | 08-SRNP-20494       | MHMXW196-09           | JF754245                 |
| 3191              | Telemiades fides | Pyrginae         | 08-SRNP-65208       | MHMXW197-09           | JF754246                 |

| <b>Tree Order</b> | <b>Species</b>   | <b>Subfamily</b> | <b>ACG Sampleid</b> | <b>BOLD Processid</b> | <b>Genbank Accession</b> |
|-------------------|------------------|------------------|---------------------|-----------------------|--------------------------|
| 3192              | Telemiades fides | Pyrginae         | 08-SRNP-20966       | MHMXW198-09           | JF754247                 |
| 3193              | Telemiades fides | Pyrginae         | 08-SRNP-21083       | MHMXW199-09           | JF754248                 |
| 3194              | Telemiades fides | Pyrginae         | 08-SRNP-971         | MHMXW201-09           | JF754249                 |
| 3195              | Telemiades fides | Pyrginae         | 08-SRNP-2340        | MHMXW204-09           | JF754251                 |
| 3196              | Telemiades fides | Pyrginae         | 08-SRNP-65455       | MHMXW205-09           | JF754252                 |
| 3197              | Telemiades fides | Pyrginae         | 08-SRNP-45069       | MHMXW206-09           | JF754253                 |
| 3198              | Telemiades fides | Pyrginae         | 07-SRNP-24562       | MHMXW207-09           | JF754254                 |
| 3199              | Telemiades fides | Pyrginae         | 08-SRNP-45067       | MHMXW209-09           | JF754256                 |
| 3200              | Telemiades fides | Pyrginae         | 08-SRNP-55478       | MHMXW210-09           | JF754257                 |
| 3201              | Telemiades fides | Pyrginae         | 08-SRNP-45144       | MHMXW211-09           | JF754258                 |
| 3202              | Telemiades fides | Pyrginae         | 08-SRNP-2342        | MHMXW253-09           | JF754297                 |
| 3203              | Telemiades fides | Pyrginae         | 07-SRNP-61016       | MHMXW254-09           | JF754298                 |
| 3204              | Telemiades fides | Pyrginae         | 08-SRNP-1790        | MHMXW257-09           | JF754301                 |
| 3205              | Telemiades fides | Pyrginae         | 08-SRNP-65277       | MHMXW258-09           | JF754302                 |
| 3206              | Telemiades fides | Pyrginae         | 08-SRNP-45161       | MHMXW212-09           | JF754259                 |
| 3207              | Telemiades fides | Pyrginae         | 07-SRNP-61357       | MHMXW213-09           | JF754260                 |
| 3208              | Telemiades fides | Pyrginae         | 08-SRNP-21071       | MHMXW215-09           | JF754262                 |
| 3209              | Telemiades fides | Pyrginae         | 08-SRNP-45065       | MHMXW216-09           | JF754263                 |
| 3210              | Telemiades fides | Pyrginae         | 08-SRNP-65278       | MHMXW218-09           | JF754265                 |
| 3211              | Telemiades fides | Pyrginae         | 08-SRNP-65292       | MHMXW219-09           | JF754266                 |
| 3212              | Telemiades fides | Pyrginae         | 08-SRNP-65279       | MHMXW220-09           | JF754267                 |
| 3213              | Telemiades fides | Pyrginae         | 08-SRNP-45093       | MHMXW221-09           | JF754268                 |
| 3214              | Telemiades fides | Pyrginae         | 08-SRNP-45143       | MHMXW222-09           | JF754269                 |
| 3215              | Telemiades fides | Pyrginae         | 07-SRNP-61184       | MHMXW224-09           | JF754271                 |
| 3216              | Telemiades fides | Pyrginae         | 08-SRNP-21378       | MHMXW225-09           | JF754272                 |
| 3217              | Telemiades fides | Pyrginae         | 08-SRNP-2123        | MHMXW226-09           | JF754273                 |
| 3218              | Telemiades fides | Pyrginae         | 08-SRNP-40973       | MHMXW227-09           | JF754274                 |
| 3219              | Telemiades fides | Pyrginae         | 08-SRNP-55982       | MHMXW229-09           | JF754275                 |
| 3220              | Telemiades fides | Pyrginae         | 08-SRNP-2424        | MHMXW230-09           | JF754276                 |
| 3221              | Telemiades fides | Pyrginae         | 08-SRNP-1346        | MHMXW231-09           | JF754277                 |
| 3222              | Telemiades fides | Pyrginae         | 07-SRNP-61358       | MHMXW232-09           | JF754278                 |
| 3223              | Telemiades fides | Pyrginae         | 08-SRNP-2357        | MHMXW233-09           | JF754279                 |
| 3224              | Telemiades fides | Pyrginae         | 07-SRNP-60943       | MHMXW234-09           | JF754280                 |
| 3225              | Telemiades fides | Pyrginae         | 08-SRNP-55069       | MHMXW235-09           | JF754281                 |
| 3226              | Telemiades fides | Pyrginae         | 08-SRNP-55417       | MHMXW236-09           | JF754282                 |
| 3227              | Telemiades fides | Pyrginae         | 08-SRNP-65209       | MHMXW237-09           | JF754283                 |
| 3228              | Telemiades fides | Pyrginae         | 08-SRNP-65076       | MHMXW238-09           | JF754284                 |
| 3229              | Telemiades fides | Pyrginae         | 08-SRNP-2338        | MHMXW240-09           | JF754285                 |
| 3230              | Telemiades fides | Pyrginae         | 08-SRNP-2339        | MHMXW241-09           | JF754286                 |
| 3231              | Telemiades fides | Pyrginae         | 08-SRNP-65207       | MHMXW242-09           | JF754287                 |
| 3232              | Telemiades fides | Pyrginae         | 08-SRNP-700         | MHMXW243-09           | JF754288                 |
| 3233              | Telemiades fides | Pyrginae         | 08-SRNP-65456       | MHMXW244-09           | JF754289                 |
| 3234              | Telemiades fides | Pyrginae         | 08-SRNP-55442       | MHMXW245-09           | JF754290                 |
| 3235              | Telemiades fides | Pyrginae         | 08-SRNP-1136        | MHMXW246-09           | JF754291                 |
| 3236              | Telemiades fides | Pyrginae         | 08-SRNP-65115       | MHMXW247-09           | JF754292                 |
| 3237              | Telemiades fides | Pyrginae         | 08-SRNP-55513       | MHMXW248-09           | JF754293                 |
| 3238              | Telemiades fides | Pyrginae         | 02-SRNP-31483       | CSRII691-05           | DQ293562                 |
| 3239              | Telemiades fides | Pyrginae         | 02-SRNP-33670       | CSRII688-05           | DQ293559                 |
| 3240              | Telemiades fides | Pyrginae         | 02-SRNP-34173       | CSRII711-05           | DQ293573                 |
| 3241              | Telemiades fides | Pyrginae         | 02-SRNP-5432        | CSRII698-05           | DQ293567                 |
| 3242              | Telemiades fides | Pyrginae         | 02-SRNP-5434        | CSRII695-05           | DQ293566                 |
| 3243              | Telemiades fides | Pyrginae         | 02-SRNP-31828       | CSRII703-05           | DQ293570                 |
| 3244              | Telemiades fides | Pyrginae         | 02-SRNP-5700        | CSRII679-05           | DQ293550                 |
| 3245              | Telemiades fides | Pyrginae         | 02-SRNP-27163       | CSRII687-05           | DQ293558                 |
| 3246              | Telemiades fides | Pyrginae         | 02-SRNP-14146       | CSRII674-05           | DQ293546                 |
| 3247              | Telemiades fides | Pyrginae         | 02-SRNP-5436        | CSRII671-05           | DQ293544                 |

| <b>Tree Order</b> | <b>Species</b>   | <b>Subfamily</b> | <b>ACG Sampleid</b> | <b>BOLD Processid</b> | <b>Genbank Accession</b> |
|-------------------|------------------|------------------|---------------------|-----------------------|--------------------------|
| 3248              | Telemiades fides | Pyrginae         | 02-SRNP-19106       | CSRII692-05           | DQ293563                 |
| 3249              | Telemiades fides | Pyrginae         | 02-SRNP-18972       | CSRII699-05           | DQ293568                 |
| 3250              | Telemiades fides | Pyrginae         | 02-SRNP-2328        | CSRII712-05           | DQ293574                 |
| 3251              | Telemiades fides | Pyrginae         | 02-SRNP-2456        | CSRII675-05           | DQ293547                 |
| 3252              | Telemiades fides | Pyrginae         | 03-SRNP-5752        | CSRII682-05           | DQ293553                 |
| 3253              | Telemiades fides | Pyrginae         | 03-SRNP-5014        | CSRII685-05           | DQ293556                 |
| 3254              | Telemiades fides | Pyrginae         | 03-SRNP-31075       | CSRII690-05           | DQ293561                 |
| 3255              | Telemiades fides | Pyrginae         | 02-SRNP-20490       | CSRII693-05           | DQ293564                 |
| 3256              | Telemiades fides | Pyrginae         | 02-SRNP-18846       | CSRII704-05           | DQ293571                 |
| 3257              | Telemiades fides | Pyrginae         | 07-SRNP-4623        | MHMXS024-08           | JF763155                 |
| 3258              | Telemiades fides | Pyrginae         | 07-SRNP-4756        | MHMXS003-08           | JF763175                 |
| 3259              | Telemiades fides | Pyrginae         | 07-SRNP-429         | MHAHK333-07           | JF761206                 |
| 3260              | Telemiades fides | Pyrginae         | 07-SRNP-20828       | MHAHL495-07           | JF763141                 |
| 3261              | Telemiades fides | Pyrginae         | 08-SRNP-20412       | MHMXW203-09           | JF754250                 |
| 3262              | Telemiades fides | Pyrginae         | 05-SRNP-45213       | MHAHF567-06           | GU150911                 |
| 3263              | Telemiades fides | Pyrginae         | 07-SRNP-3837        | MHM XR575-08          | JF763201                 |
| 3264              | Telemiades fides | Pyrginae         | 07-SRNP-33828       | MHM XR573-08          | JF763202                 |
| 3265              | Telemiades fides | Pyrginae         | 07-SRNP-3730        | MHM XO927-08          | JF763208                 |
| 3266              | Telemiades fides | Pyrginae         | 05-SRNP-55621       | MHAHF937-06           | GU150914                 |
| 3267              | Telemiades fides | Pyrginae         | 96-SRNP-992         | CSRII749-05           | DQ293577                 |
| 3268              | Telemiades fides | Pyrginae         | 00-SRNP-20860       | CSRII748-05           | DQ293576                 |
| 3269              | Telemiades fides | Pyrginae         | 92-SRNP-6139        | CSRII763-05           | DQ293579                 |
| 3270              | Telemiades fides | Pyrginae         | 02-SRNP-31421       | CSCR464-04            | DQ293541                 |
| 3271              | Telemiades fides | Pyrginae         | 92-SRNP-5681        | CSRII762-05           | DQ293578                 |
| 3272              | Telemiades fides | Pyrginae         | 03-SRNP-12110       | CSRII670-05           | DQ293543                 |
| 3273              | Telemiades fides | Pyrginae         | 06-SRNP-12339       | MHAHG735-06           | GU151743                 |
| 3274              | Telemiades fides | Pyrginae         | 07-SRNP-1494        | MHAHK341-07           | JF761213                 |
| 3275              | Telemiades fides | Pyrginae         | 07-SRNP-4234        | MHM XR600-08          | JF763178                 |
| 3276              | Telemiades fides | Pyrginae         | 07-SRNP-60566       | MHM XR571-08          | JF763204                 |
| 3277              | Telemiades fides | Pyrginae         | 07-SRNP-30817       | MHAHK345-07           | JF761217                 |
| 3278              | Telemiades fides | Pyrginae         | 08-SRNP-20211       | MHMXW208-09           | JF754255                 |
| 3279              | Telemiades fides | Pyrginae         | 07-SRNP-42397       | MHM XO933-08          | JF763207                 |
| 3280              | Telemiades fides | Pyrginae         | 07-SRNP-3474        | MHM XO923-08          | JF763211                 |
| 3281              | Telemiades fides | Pyrginae         | 07-SRNP-4408        | MHM XS012-08          | JF763166                 |
| 3282              | Telemiades fides | Pyrginae         | 08-SRNP-65408       | MHMXW217-09           | JF754264                 |
| 3283              | Telemiades fides | Pyrginae         | 07-SRNP-4099        | MHM XR602-08          | JF763177                 |
| 3284              | Telemiades fides | Pyrginae         | 07-SRNP-3733        | MHM XO926-08          | JF763209                 |
| 3285              | Telemiades fides | Pyrginae         | 07-SRNP-5157        | MHM XS009-08          | JF763169                 |
| 3286              | Telemiades fides | Pyrginae         | 07-SRNP-4492        | MHM XS023-08          | JF763156                 |
| 3287              | Telemiades fides | Pyrginae         | 07-SRNP-24713       | MHMXW250-09           | JF754295                 |
| 3288              | Telemiades fides | Pyrginae         | 08-SRNP-65206       | MHMXW249-09           | JF754294                 |
| 3289              | Telemiades fides | Pyrginae         | 08-SRNP-55064       | MHMXW251-09           | JF754296                 |
| 3290              | Telemiades fides | Pyrginae         | 08-SRNP-55444       | MHMXW255-09           | JF754299                 |
| 3291              | Telemiades fides | Pyrginae         | 07-SRNP-60770       | MHMXW256-09           | JF754300                 |
| 3292              | Telemiades fides | Pyrginae         | 08-SRNP-65185       | MHMXW259-09           | JF754303                 |
| 3293              | Telemiades fides | Pyrginae         | 08-SRNP-2343        | MHMXW261-09           | JF754305                 |
| 3294              | Telemiades fides | Pyrginae         | 07-SRNP-15871       | MHM XX1174-09         | JF778537                 |
| 3295              | Telemiades fides | Pyrginae         | 07-SRNP-16610       | MHM XX1175-09         | JF778538                 |
| 3296              | Telemiades fides | Pyrginae         | 08-SRNP-20930       | MHM XX1181-09         | JF778539                 |
| 3297              | Telemiades fides | Pyrginae         | 07-SRNP-31883       | MHM XX148-09          | JF778529                 |
| 3298              | Telemiades fides | Pyrginae         | 07-SRNP-15746       | MHM XX720-09          | JF778532                 |
| 3299              | Telemiades fides | Pyrginae         | 07-SRNP-16467       | MHM XX721-09          | JF778533                 |
| 3300              | Telemiades fides | Pyrginae         | 08-SRNP-5844        | MHM XY974-09          | GU666547                 |
| 3301              | Telemiades fides | Pyrginae         | 08-SRNP-5513        | MHM XY975-09          | GU666548                 |
| 3302              | Telemiades fides | Pyrginae         | 07-SRNP-30816       | MHM XX153-09          | JF778530                 |
| 3303              | Telemiades fides | Pyrginae         | 07-SRNP-16643       | MHM XX719-09          | JF778531                 |

| <b>Tree Order</b> | <b>Species</b>               | <b>Subfamily</b> | <b>ACG Sampleid</b> | <b>BOLD Processid</b> | <b>Genbank Accession</b> |
|-------------------|------------------------------|------------------|---------------------|-----------------------|--------------------------|
| 3304              | Telemiades fides             | Pyrginae         | 07-SRNP-16048       | MHMXX723-09           | JF778535                 |
| 3305              | Telemiades fides             | Pyrginae         | 07-SRNP-16680       | MHMXX724-09           | JF778536                 |
| 3306              | Telemiades fides             | Pyrginae         | 08-SRNP-66070       | MHMXY976-09           | GU666549                 |
| 3307              | Telemiades fides             | Pyrginae         | 08-SRNP-23199       | MHMXY977-09           | GU666550                 |
| 3308              | Telemiades fides             | Pyrginae         | 07-SRNP-20485       | MHAHK330-07           | JF761203                 |
| 3309              | Telemiades fides             | Pyrginae         | 07-SRNP-20483       | MHAHK331-07           | JF761204                 |
| 3310              | Telemiades fides             | Pyrginae         | 06-SRNP-23268       | MHAHK332-07           | JF761205                 |
| 3311              | Telemiades fides             | Pyrginae         | 06-SRNP-67814       | MHAHK335-07           | JF761207                 |
| 3312              | Telemiades fides             | Pyrginae         | 07-SRNP-55749       | MHAHK337-07           | JF761209                 |
| 3313              | Telemiades fides             | Pyrginae         | 06-SRNP-22405       | MHAHK340-07           | JF761212                 |
| 3314              | Telemiades fides             | Pyrginae         | 02-SRNP-14139       | CSRII683-05           | DQ293554                 |
| 3315              | Telemiades fides             | Pyrginae         | 02-SRNP-5368        | CSRII673-05           | DQ293545                 |
| 3316              | Telemiades fides             | Pyrginae         | 02-SRNP-10004       | CSRII686-05           | DQ293557                 |
| 3317              | Telemiades fides             | Pyrginae         | 02-SRNP-10052       | CSRII702-05           | DQ293569                 |
| 3318              | Telemiades fides             | Pyrginae         | 02-SRNP-13773       | CSRII710-05           | DQ293572                 |
| 3319              | Telemiades fides             | Pyrginae         | 01-SRNP-9333        | CSRII717-05           | DQ293575                 |
| 3320              | Telemiades fides             | Pyrginae         | 05-SRNP-55777       | MHAHF928-06           | GU150915                 |
| 3321              | Telemiades fides             | Pyrginae         | 04-SRNP-36226       | MHAHF929-06           | GU150904                 |
| 3322              | Telemiades fides             | Pyrginae         | 05-SRNP-2772        | MHAHF930-06           | GU150908                 |
| 3323              | Telemiades fides             | Pyrginae         | 05-SRNP-1858        | MHAHF931-06           | GU150907                 |
| 3324              | Telemiades fides             | Pyrginae         | 05-SRNP-32225       | MHAHF932-06           | GU150918                 |
| 3325              | Telemiades fides             | Pyrginae         | 05-SRNP-13190       | MHAHF933-06           | GU150919                 |
| 3326              | Telemiades fides             | Pyrginae         | 05-SRNP-55784       | MHAHF934-06           | GU150917                 |
| 3327              | Telemiades fides             | Pyrginae         | 05-SRNP-55783       | MHAHF936-06           | GU150909                 |
| 3328              | Telemiades fides             | Pyrginae         | 05-SRNP-1265        | MHAHF568-06           | GU150905                 |
| 3329              | Telemiades fides             | Pyrginae         | 05-SRNP-55774       | MHAHF569-06           | GU150906                 |
| 3330              | Telemiades fides             | Pyrginae         | 06-SRNP-12677       | MHAHG733-06           | GU151742                 |
| 3331              | Telemiades fides             | Pyrginae         | 06-SRNP-12708       | MHAHG734-06           | GU151741                 |
| 3332              | Telemiades fides             | Pyrginae         | 06-SRNP-60264       | MHMXH878-07           | JF761201                 |
| 3333              | Telemiades fides             | Pyrginae         | 06-SRNP-60266       | MHMXH879-07           | JF761202                 |
| 3334              | Telemiades fides             | Pyrginae         | 02-SRNP-1254        | CSRII689-05           | DQ293560                 |
| 3335              | Telemiades fides             | Pyrginae         | 02-SRNP-2194        | CSRII684-05           | DQ293555                 |
| 3336              | Telemiades fides             | Pyrginae         | 09-SRNP-65293       | MHMYE883-09           | GU653718                 |
| 3337              | Telemiades fides             | Pyrginae         | 09-SRNP-65344       | MHMYE884-09           | GU653719                 |
| 3338              | Telemiades fides             | Pyrginae         | 09-SRNP-44485       | MHMYE1502-09          | GU653502                 |
| 3339              | Telemiades fides             | Pyrginae         | 09-SRNP-66013       | MHMYH122-10           | HM887274                 |
| 3340              | Telemiades Burns02           | Pyrginae         | 05-SRNP-40200       | MHAHD384-05           | GU161887                 |
| 3341              | Telemiades Burns02           | Pyrginae         | 05-SRNP-2164        | MHAHE359-05           | GU150113                 |
| 3342              | Telemiades Burns02           | Pyrginae         | 05-SRNP-33036       | MHAHF622-06           | GU150903                 |
| 3343              | Telemiades Burns02           | Pyrginae         | 05-SRNP-43775       | MHAHF623-06           | GU150902                 |
| 3344              | Telemiades Burns02           | Pyrginae         | 07-SRNP-3595        | MHMXP190-08           | JF763124                 |
| 3345              | Telemiades gallius           | Pyrginae         | 00-SRNP-4456        | CSCR262-04            | DQ293581                 |
| 3346              | Telemiades gallius           | Pyrginae         | 99-SRNP-13875       | CSCR261-04            | DQ293580                 |
| 3347              | Telemiades chrysorrhoeaDHJ01 | Pyrginae         | 03-SRNP-3888        | XAA823-04             | DQ293521                 |
| 3348              | Telemiades chrysorrhoeaDHJ01 | Pyrginae         | 02-SRNP-23372       | CSRII160-04           | DQ293506                 |
| 3349              | Telemiades chrysorrhoeaDHJ01 | Pyrginae         | 02-SRNP-23231       | MHAHC273-05           | DQ293534                 |
| 3350              | Telemiades chrysorrhoeaDHJ01 | Pyrginae         | 04-SRNP-35467       | MHAHD897-05           | GU161888                 |
| 3351              | Telemiades chrysorrhoeaDHJ01 | Pyrginae         | 03-SRNP-4126        | XAA829-04             | DQ293522                 |
| 3352              | Telemiades chrysorrhoeaDHJ01 | Pyrginae         | 03-SRNP-4445        | XAA813-04             | DQ293516                 |
| 3353              | Telemiades chrysorrhoeaDHJ01 | Pyrginae         | 03-SRNP-3666        | XAA831-04             | DQ293523                 |
| 3354              | Telemiades chrysorrhoeaDHJ01 | Pyrginae         | 03-SRNP-4745        | XAA815-04             | DQ293517                 |
| 3355              | Telemiades chrysorrhoeaDHJ01 | Pyrginae         | 03-SRNP-4261        | XAA799-04             | DQ293513                 |
| 3356              | Telemiades chrysorrhoeaDHJ01 | Pyrginae         | 02-SRNP-9407        | XAA783-04             | DQ293512                 |
| 3357              | Telemiades chrysorrhoeaDHJ01 | Pyrginae         | 02-SRNP-9730        | XAA767-04             | DQ293510                 |
| 3358              | Telemiades chrysorrhoeaDHJ01 | Pyrginae         | 02-SRNP-9405        | XAA832-04             | DQ293524                 |
| 3359              | Telemiades chrysorrhoeaDHJ01 | Pyrginae         | 02-SRNP-9230        | XAA816-04             | DQ293518                 |

| <b>Tree Order</b> | <b>Species</b>               | <b>Subfamily</b> | <b>ACG Sampleid</b> | <b>BOLD Processid</b> | <b>Genbank Accession</b> |
|-------------------|------------------------------|------------------|---------------------|-----------------------|--------------------------|
| 3360              | Telemiades chrysorrhoeaDHJ01 | Pyrginae         | 07-SRNP-36106       | MHMXP126-08           | JF763126                 |
| 3361              | Telemiades chrysorrhoeaDHJ01 | Pyrginae         | 00-SRNP-9621        | MHAHC368-05           | DQ293539                 |
| 3362              | Telemiades chrysorrhoeaDHJ01 | Pyrginae         | 00-SRNP-9804        | MHAHC367-05           | DQ293538                 |
| 3363              | Telemiades chrysorrhoeaDHJ01 | Pyrginae         | 01-SRNP-6022        | MHAHC366-05           | DQ293537                 |
| 3364              | Telemiades chrysorrhoeaDHJ01 | Pyrginae         | 02-SRNP-8012        | MHAHC269-05           | DQ293531                 |
| 3365              | Telemiades chrysorrhoeaDHJ01 | Pyrginae         | 01-SRNP-6829        | MHAHC365-05           | DQ293536                 |
| 3366              | Telemiades chrysorrhoeaDHJ01 | Pyrginae         | 03-SRNP-4023        | MHAHC267-05           | DQ293530                 |
| 3367              | Telemiades chrysorrhoeaDHJ01 | Pyrginae         | 03-SRNP-4298        | MHAHC266-05           | DQ293529                 |
| 3368              | Telemiades chrysorrhoeaDHJ01 | Pyrginae         | 03-SRNP-4631        | MHAHC265-05           | DQ293528                 |
| 3369              | Telemiades chrysorrhoeaDHJ01 | Pyrginae         | 01-SRNP-6010        | MHAHC364-05           | DQ293535                 |
| 3370              | Telemiades chrysorrhoeaDHJ01 | Pyrginae         | 03-SRNP-4020        | XAA822-04             | DQ293520                 |
| 3371              | Telemiades chrysorrhoeaDHJ01 | Pyrginae         | 03-SRNP-4299        | MHAHC264-05           | DQ293527                 |
| 3372              | Telemiades chrysorrhoeaDHJ01 | Pyrginae         | 02-SRNP-23178       | CSRII519-04           | DQ293507                 |
| 3373              | Telemiades chrysorrhoeaDHJ01 | Pyrginae         | 02-SRNP-23351       | CSRII520-04           | DQ293508                 |
| 3374              | Telemiades chrysorrhoeaDHJ01 | Pyrginae         | 02-SRNP-23358       | CSRII521-04           | DQ293509                 |
| 3375              | Telemiades chrysorrhoeaDHJ01 | Pyrginae         | 02-SRNP-23070       | XAA821-04             | DQ293519                 |
| 3376              | Telemiades chrysorrhoeaDHJ01 | Pyrginae         | 03-SRNP-4448        | XAA807-04             | DQ293515                 |
| 3377              | Telemiades chrysorrhoeaDHJ01 | Pyrginae         | 02-SRNP-9520        | XAA775-04             | DQ293511                 |
| 3378              | Telemiades chrysorrhoeaDHJ01 | Pyrginae         | 03-SRNP-4025        | XAA805-04             | DQ293514                 |
| 3379              | Telemiades chrysorrhoeaDHJ01 | Pyrginae         | 02-SRNP-9560        | XAA841-04             | DQ293526                 |
| 3380              | Telemiades chrysorrhoeaDHJ01 | Pyrginae         | 02-SRNP-9227        | XAA840-04             | DQ293525                 |
| 3381              | Telemiades chrysorrhoeaDHJ01 | Pyrginae         | 02-SRNP-8011        | MHAHC270-05           | DQ293532                 |
| 3382              | Telemiades chrysorrhoeaDHJ01 | Pyrginae         | 03-SRNP-4743        | MHAHC271-05           | DQ293533                 |
| 3383              | Telemiades chrysorrhoeaDHJ01 | Pyrginae         | 01-SRNP-6170        | MHAHC369-05           | DQ293540                 |
| 3384              | Telemiades chrysorrhoeaDHJ01 | Pyrginae         | 04-SRNP-35573       | MHAHD898-05           | GU161889                 |
| 3385              | Telemiades chrysorrhoeaDHJ01 | Pyrginae         | 08-SRNP-35603       | MHMXX490-09           | JF778526                 |
| 3386              | Telemiades chrysorrhoeaDHJ01 | Pyrginae         | 08-SRNP-35580       | MHMXX492-09           | JF778527                 |
| 3387              | Telemiades chrysorrhoeaDHJ01 | Pyrginae         | 08-SRNP-35605       | MHMXX497-09           | JF778528                 |
| 3388              | Telemiades chrysorrhoeaDHJ02 | Pyrginae         | 03-SRNP-4636        | XAA830-04             | JF750786                 |
| 3389              | Telemiades chrysorrhoeaDHJ02 | Pyrginae         | 03-SRNP-4892        | XAA814-04             | JF750785                 |
| 3390              | Telemiades chrysorrhoeaDHJ02 | Pyrginae         | 08-SRNP-35601       | MHMXX493-09           | GU666362                 |
| 3391              | Telemiades chrysorrhoeaDHJ02 | Pyrginae         | 02-SRNP-8074        | CSRII516-04           | JF750790                 |
| 3392              | Telemiades chrysorrhoeaDHJ02 | Pyrginae         | 03-SRNP-4837        | XAA782-04             | JF750782                 |
| 3393              | Telemiades chrysorrhoeaDHJ02 | Pyrginae         | 02-SRNP-23202       | MHAHC272-05           | JF750794                 |
| 3394              | Telemiades chrysorrhoeaDHJ02 | Pyrginae         | 08-SRNP-35613       | MHMXX496-09           | GU666361                 |
| 3395              | Telemiades chrysorrhoeaDHJ02 | Pyrginae         | 08-SRNP-35384       | MHMXX495-09           | GU666360                 |
| 3396              | Telemiades chrysorrhoeaDHJ02 | Pyrginae         | 08-SRNP-35968       | MHMXX494-09           | GU666363                 |
| 3397              | Telemiades chrysorrhoeaDHJ02 | Pyrginae         | 08-SRNP-35614       | MHMXX491-09           | GU666365                 |
| 3398              | Telemiades chrysorrhoeaDHJ02 | Pyrginae         | 08-SRNP-35579       | MHMXX498-09           | GU666358                 |
| 3399              | Telemiades chrysorrhoeaDHJ02 | Pyrginae         | 08-SRNP-35966       | MHMXX499-09           | GU666359                 |
| 3400              | Telemiades chrysorrhoeaDHJ02 | Pyrginae         | 03-SRNP-4632        | XAA846-04             | JF750789                 |
| 3401              | Telemiades chrysorrhoeaDHJ02 | Pyrginae         | 03-SRNP-4447        | XAA838-04             | JF750788                 |
| 3402              | Telemiades chrysorrhoeaDHJ02 | Pyrginae         | 02-SRNP-9408        | CSRII517-04           | JF750791                 |
| 3403              | Telemiades chrysorrhoeaDHJ02 | Pyrginae         | 02-SRNP-9930        | CSRII518-04           | JF750792                 |
| 3404              | Telemiades chrysorrhoeaDHJ02 | Pyrginae         | 03-SRNP-4026        | XAA765-04             | JF750779                 |
| 3405              | Telemiades chrysorrhoeaDHJ02 | Pyrginae         | 03-SRNP-4297        | XAA773-04             | JF750780                 |
| 3406              | Telemiades chrysorrhoeaDHJ02 | Pyrginae         | 03-SRNP-4742        | XAA797-04             | JF750784                 |
| 3407              | Telemiades chrysorrhoeaDHJ02 | Pyrginae         | 03-SRNP-3440        | CSCR425-04            | JF750797                 |
| 3408              | Telemiades chrysorrhoeaDHJ02 | Pyrginae         | 03-SRNP-3441        | CSCR424-04            | JF750798                 |
| 3409              | Telemiades chrysorrhoeaDHJ02 | Pyrginae         | 02-SRNP-23096       | CSRII158-04           | JF750793                 |
| 3410              | Telemiades chrysorrhoeaDHJ02 | Pyrginae         | 02-SRNP-23179       | CSRII159-04           | JF750799                 |
| 3411              | Telemiades chrysorrhoeaDHJ02 | Pyrginae         | 00-SRNP-9561        | MHAHC372-05           | JF750801                 |
| 3412              | Telemiades chrysorrhoeaDHJ02 | Pyrginae         | 01-SRNP-6918        | MHAHC371-05           | JF750796                 |
| 3413              | Telemiades chrysorrhoeaDHJ02 | Pyrginae         | 02-SRNP-9664        | MHAHC277-05           | JF750795                 |
| 3414              | Telemiades chrysorrhoeaDHJ02 | Pyrginae         | 01-SRNP-6864        | MHAHC370-05           | JF750800                 |
| 3415              | Telemiades chrysorrhoeaDHJ02 | Pyrginae         | 02-SRNP-9445        | XAA758-04             | JF750778                 |

| Tree Order | Species                      | Subfamily | ACG Sampleid    | BOLD Processid | Genbank Accession |
|------------|------------------------------|-----------|-----------------|----------------|-------------------|
| 3416       | Telemiades chrysorrhoeaDHJ02 | Pyrginae  | 02-SRNP-9929    | XAA790-04      | JF750783          |
| 3417       | Telemiades chrysorrhoeaDHJ02 | Pyrginae  | 02-SRNP-23273   | XAA833-04      | JF750787          |
| 3418       | Telemiades chrysorrhoeaDHJ02 | Pyrginae  | 02-SRNP-23201   | XAA774-04      | JF750781          |
| 3419       | Telemiades chrysorrhoeaDHJ02 | Pyrginae  | 08-SRNP-37068   | MHMYE893-09    | GU653711          |
| 3420       | Telemiades megallus          | Pyrginae  | 08-SRNP-66068   | MHMXY1089-09   | GU666454          |
| 3421       | Telemiades megallus          | Pyrginae  | 08-SRNP-40055   | MHMXT088-08    | JF763222          |
| 3422       | Telemiades megallus          | Pyrginae  | 07-SRNP-42824   | MHMXT089-08    | JF763221          |
| 3423       | Telemiades megallus          | Pyrginae  | 03-SRNP-31164   | CSCR428-04     | DQ293583          |
| 3424       | Telemiades megallus          | Pyrginae  | 07-SRNP-3719    | MHMXR624-08    | JF763234          |
| 3425       | Telemiades megallus          | Pyrginae  | 08-SRNP-40056   | MHMXT170-08    | JF763223          |
| 3426       | Telemiades megallus          | Pyrginae  | 07-SRNP-42778   | MHMXT169-08    | JF763224          |
| 3427       | Telemiades megallus          | Pyrginae  | 07-SRNP-42752   | MHMXR770-08    | JF763227          |
| 3428       | Telemiades megallus          | Pyrginae  | 07-SRNP-33307   | MHMXP172-08    | JF763236          |
| 3429       | Telemiades megallus          | Pyrginae  | 07-SRNP-24437   | MHMXR627-08    | JF763231          |
| 3430       | Telemiades megallus          | Pyrginae  | 07-SRNP-43135   | MHMXT090-08    | JF763220          |
| 3431       | Telemiades megallus          | Pyrginae  | 07-SRNP-43082   | MHMXX932-09    | JF778540          |
| 3432       | Telemiades megallus          | Pyrginae  | 09-SRNP-69855   | MHMYG2445-10   | HM885870          |
| 3433       | Telemiades megallus          | Pyrginae  | 07-SRNP-42971   | MHMXT168-08    | JF763225          |
| 3434       | Telemiades megallus          | Pyrginae  | 07-SRNP-42910   | MHMXT092-08    | JF763218          |
| 3435       | Telemiades megallus          | Pyrginae  | 07-SRNP-3809    | MHMXR630-08    | JF763228          |
| 3436       | Telemiades megallus          | Pyrginae  | 07-SRNP-42969   | MHMXR629-08    | JF763229          |
| 3437       | Telemiades megallus          | Pyrginae  | 07-SRNP-33308   | MHMXP189-08    | JF763235          |
| 3438       | Telemiades megallus          | Pyrginae  | 07-SRNP-41026   | MHAHL248-07    | JF763216          |
| 3439       | Telemiades megallus          | Pyrginae  | 07-SRNP-30422   | MHMXX037-07    | JF763237          |
| 3440       | Telemiades megallus          | Pyrginae  | 05-SRNP-24526   | MHAHF621-06    | GU150921          |
| 3441       | Telemiades megallus          | Pyrginae  | 04-SRNP-111     | CSRII157-04    | DQ293585          |
| 3442       | Telemiades megallus          | Pyrginae  | 03-SRNP-30710   | CSCR583-04     | DQ293584          |
| 3443       | Telemiades megallus          | Pyrginae  | 07-SRNP-42440   | MHMXR628-08    | JF763230          |
| 3444       | Telemiades megallus          | Pyrginae  | 00-SRNP-21554   | CSCR263-04     | DQ293582          |
| 3445       | Telemiades megallus          | Pyrginae  | 07-SRNP-4414    | MHMXR625-08    | JF763233          |
| 3446       | Telemiades megallus          | Pyrginae  | 07-SRNP-42987   | MHMXT091-08    | JF763219          |
| 3447       | Telemiades megallus          | Pyrginae  | 07-SRNP-5171    | MHMXT093-08    | JF763217          |
| 3448       | Telemiades megallus          | Pyrginae  | 07-SRNP-42879   | MHMXT167-08    | JF763226          |
| 3449       | Telemiades megallus          | Pyrginae  | 09-SRNP-69856   | MHMYG2451-10   | HM885877          |
| 3450       | Telemiades oiclus            | Pyrginae  | 03-SRNP-7387    | MHAHJ145-07    | JF753191          |
| 3451       | Telemiades oiclus            | Pyrginae  | 05-SRNP-5462    | MHAHF503-06    | GU150926          |
| 3452       | Telemiades oiclus            | Pyrginae  | 03-SRNP-12536.1 | MHAHJ143-07    | JF753189          |
| 3453       | Telemiades oiclus            | Pyrginae  | 04-SRNP-30865   | MHAHJ140-07    | JF753186          |
| 3454       | Telemiades oiclus            | Pyrginae  | 04-SRNP-55048   | MHAHE351-05    | GU150115          |
| 3455       | Telemiades oiclus            | Pyrginae  | 04-SRNP-56957   | MHAHE350-05    | GU150116          |
| 3456       | Telemiades oiclus            | Pyrginae  | 04-SRNP-56954   | MHAHE349-05    | GU150114          |
| 3457       | Telemiades oiclus            | Pyrginae  | 03-SRNP-7308    | CSCR400-04     | DQ293124          |
| 3458       | Telemiades oiclus            | Pyrginae  | 01-SRNP-3727    | CSCR214-04     | DQ293123          |
| 3459       | Telemiades oiclus            | Pyrginae  | 03-SRNP-12588.1 | MHAHJ139-07    | JF753185          |
| 3460       | Telemiades oiclus            | Pyrginae  | 03-SRNP-20865   | MHAHJ141-07    | JF753187          |
| 3461       | Telemiades oiclus            | Pyrginae  | 00-SRNP-22202   | MHAHJ142-07    | JF753188          |
| 3462       | Telemiades oiclus            | Pyrginae  | 01-SRNP-2947    | MHAHJ146-07    | JF753192          |
| 3463       | Telemiades oiclus            | Pyrginae  | 07-SRNP-2201    | MHAHL222-07    | JF763243          |
| 3464       | Telemiades oiclus            | Pyrginae  | 01-SRNP-25089   | MHAHJ144-07    | JF753190          |
| 3465       | Telemiades oiclus            | Pyrginae  | 05-SRNP-42621   | MHAHF504-06    | GU150927          |
| 3466       | Telemiades oiclus            | Pyrginae  | 07-SRNP-2119    | MHAHL223-07    | JF763244          |
| 3467       | Telemiades oiclus            | Pyrginae  | 07-SRNP-1786    | MHAHL224-07    | JF763245          |
| 3468       | Telemiades oiclus            | Pyrginae  | 07-SRNP-2582    | MHAHL225-07    | JF763246          |
| 3469       | Telemiades oiclus            | Pyrginae  | 07-SRNP-33526   | MHMXR897-08    | JF763247          |
| 3470       | Telemiades nicomedes         | Pyrginae  | 07-SRNP-42342   | MHMXP209-08    | JF763241          |
| 3471       | Telemiades nicomedes         | Pyrginae  | 05-SRNP-33522   | MHAHF620-06    | GU150925          |

| <b>Tree Order</b> | <b>Species</b>         | <b>Subfamily</b> | <b>ACG Sampleid</b> | <b>BOLD Processid</b> | <b>Genbank Accession</b> |
|-------------------|------------------------|------------------|---------------------|-----------------------|--------------------------|
| 3472              | Telemiades nicomedes   | Pyrginae         | 06-SRNP-42935       | MHAHI608-06           | GU156359                 |
| 3473              | Telemiades nicomedes   | Pyrginae         | 05-SRNP-33746       | MHAHF617-06           | GU150922                 |
| 3474              | Telemiades nicomedes   | Pyrginae         | 03-SRNP-21802       | CSCR584-04            | DQ293586                 |
| 3475              | Telemiades nicomedes   | Pyrginae         | 03-SRNP-27835       | CSRII161-04           | DQ293587                 |
| 3476              | Telemiades nicomedes   | Pyrginae         | 04-SRNP-2174        | XAA794-04             | DQ293589                 |
| 3477              | Telemiades nicomedes   | Pyrginae         | 05-SRNP-43154       | MHAHF619-06           | GU150924                 |
| 3478              | Telemiades nicomedes   | Pyrginae         | 06-SRNP-31788       | MHAHH466-06           | GU155672                 |
| 3479              | Telemiades nicomedes   | Pyrginae         | 06-SRNP-31705       | MHAHH467-06           | GU155673                 |
| 3480              | Telemiades nicomedes   | Pyrginae         | 06-SRNP-43594       | MHAHJ483-07           | JF753184                 |
| 3481              | Telemiades nicomedes   | Pyrginae         | 06-SRNP-65735       | MHMXXK061-07          | JF763242                 |
| 3482              | Telemiades nicomedes   | Pyrginae         | 07-SRNP-42490       | MHMXR623-08           | JF763240                 |
| 3483              | Telemiades nicomedes   | Pyrginae         | 08-SRNP-65358       | MHMXS086-08           | JF763239                 |
| 3484              | Telemiades nicomedes   | Pyrginae         | 08-SRNP-65381       | MHMXXW545-09          | JF754306                 |
| 3485              | Telemiades nicomedes   | Pyrginae         | 08-SRNP-40801       | MHMXX1068-09          | JF778541                 |
| 3486              | Telemiades nicomedes   | Pyrginae         | 08-SRNP-22689       | MHMXX580-09           | JF778542                 |
| 3487              | Telemiades nicomedes   | Pyrginae         | 08-SRNP-22691       | MHMXX581-09           | JF778543                 |
| 3488              | Telemiades nicomedes   | Pyrginae         | 08-SRNP-2225        | MHMXXW546-09          | JF754307                 |
| 3489              | Telemiades nicomedes   | Pyrginae         | 05-SRNP-33923       | MHAHF618-06           | GU150923                 |
| 3490              | Telemiades nicomedes   | Pyrginae         | 06-SRNP-44852       | MHMXH858-07           | JF761222                 |
| 3491              | Telemiades nicomedes   | Pyrginae         | 05-SRNP-34684       | MHAHG224-06           | GU151744                 |
| 3492              | Telemiades nicomedes   | Pyrginae         | 03-SRNP-38197       | CSRII162-04           | DQ293588                 |
| 3493              | Telemiades nicomedes   | Pyrginae         | 08-SRNP-40117       | MHMXT166-08           | JF763238                 |
| 3494              | Telemiades nicomedes   | Pyrginae         | 08-SRNP-66200       | MHMXY1076-09          | GU666466                 |
| 3495              | Telemiades nicomedes   | Pyrginae         | 08-SRNP-72830       | MHMXY1077-09          | GU666459                 |
| 3496              | Telemiades Burns01     | Pyrginae         | 98-SRNP-6688        | CSRII223-04           | DQ293501                 |
| 3497              | Telemiades Burns01     | Pyrginae         | 02-SRNP-19058       | CSRII224-04           | DQ293502                 |
| 3498              | Telemiades Burns01     | Pyrginae         | 07-SRNP-4410        | MHMXR587-08           | JF763116                 |
| 3499              | Telemiades Burns01     | Pyrginae         | 07-SRNP-3801        | MHMXXO919-08          | JF763121                 |
| 3500              | Telemiades Burns01     | Pyrginae         | 07-SRNP-3542        | MHMXXO928-08          | JF763119                 |
| 3501              | Telemiades Burns01     | Pyrginae         | 07-SRNP-3804        | MHMXXO925-08          | JF763120                 |
| 3502              | Telemiades Burns01     | Pyrginae         | 07-SRNP-3803        | MHMXXO917-08          | JF763123                 |
| 3503              | Telemiades Burns01     | Pyrginae         | 07-SRNP-2223        | MHAHL501-07           | JF763111                 |
| 3504              | Telemiades Burns01     | Pyrginae         | 07-SRNP-1335        | MHAHK348-07           | JF761200                 |
| 3505              | Telemiades Burns01     | Pyrginae         | 02-SRNP-19057       | CSRII696-05           | DQ293504                 |
| 3506              | Telemiades Burns01     | Pyrginae         | 03-SRNP-13003.1     | CSRII700-05           | DQ293505                 |
| 3507              | Telemiades Burns01     | Pyrginae         | 07-SRNP-3807        | MHMXR574-08           | JF763118                 |
| 3508              | Telemiades Burns01     | Pyrginae         | 07-SRNP-4083        | MHMXR577-08           | JF763117                 |
| 3509              | Telemiades Burns01     | Pyrginae         | 07-SRNP-4699        | MHMXS020-08           | JF763114                 |
| 3510              | Telemiades Burns01     | Pyrginae         | 08-SRNP-79          | MHMXS027-08           | JF763113                 |
| 3511              | Telemiades Burns01     | Pyrginae         | 08-SRNP-80          | MHMXS028-08           | JF763112                 |
| 3512              | Telemiades Burns01     | Pyrginae         | 08-SRNP-941         | MHMXXW200-09          | JF754229                 |
| 3513              | Telemiades Burns01     | Pyrginae         | 08-SRNP-41014       | MHMXXW228-09          | JF754230                 |
| 3514              | Telemiades Burns01     | Pyrginae         | 08-SRNP-2336        | MHMXXW239-09          | JF754231                 |
| 3515              | Telemiades Burns01     | Pyrginae         | 02-SRNP-18967       | CSRII672-05           | DQ293503                 |
| 3516              | Telemiades Burns01     | Pyrginae         | 07-SRNP-3519        | MHMXXO918-08          | JF763122                 |
| 3517              | Telemiades Burns01     | Pyrginae         | 07-SRNP-4034        | MHMXR601-08           | JF763115                 |
| 3518              | Telemiades Burns01     | Pyrginae         | 08-SRNP-1107        | MHMXXW252-09          | JF754232                 |
| 3519              | Telemiades Burns08     | Pyrginae         | 08-SRNP-65335       | MHMXS076-08           | JF763125                 |
| 3520              | Telemiades Burns08     | Pyrginae         | 09-SRNP-65738       | MHMYC379-09           | GU649933                 |
| 3521              | Telemiades Burns08     | Pyrginae         | 09-SRNP-65754       | MHMYE1494-09          | GU653510                 |
| 3522              | Telemiades antiopDhJ04 | Pyrginae         | 03-SRNP-12790.1     | CSRII154-04           | DQ293471                 |
| 3523              | Telemiades antiopDhJ04 | Pyrginae         | 08-SRNP-65458       | MHMXXW286-09          | JF754226                 |
| 3524              | Telemiades antiopDhJ04 | Pyrginae         | 07-SRNP-5113        | MHMXT003-08           | JF763095                 |
| 3525              | Telemiades antiopDhJ04 | Pyrginae         | 08-SRNP-40546       | MHMXXW279-09          | JF754224                 |
| 3526              | Telemiades antiopDhJ04 | Pyrginae         | 08-SRNP-20658       | MHMXXW278-09          | JF754223                 |
| 3527              | Telemiades antiopDhJ04 | Pyrginae         | 08-SRNP-2356        | MHMXXW271-09          | JF754221                 |

| <b>Tree Order</b> | <b>Species</b>          | <b>Subfamily</b> | <b>ACG Sampleid</b> | <b>BOLD Processid</b> | <b>Genbank Accession</b> |
|-------------------|-------------------------|------------------|---------------------|-----------------------|--------------------------|
| 3528              | Telemiades antiopeDHJ04 | Pyrginae         | 07-SRNP-5149        | MHMWX263-09           | JF754220                 |
| 3529              | Telemiades antiopeDHJ04 | Pyrginae         | 08-SRNP-213         | MHMWX262-09           | JF754219                 |
| 3530              | Telemiades antiopeDHJ04 | Pyrginae         | 07-SRNP-4662        | MHMXS073-08           | JF763099                 |
| 3531              | Telemiades antiopeDHJ04 | Pyrginae         | 07-SRNP-42683       | MHMXS065-08           | JF763100                 |
| 3532              | Telemiades antiopeDHJ04 | Pyrginae         | 08-SRNP-25          | MHMXS063-08           | JF763101                 |
| 3533              | Telemiades antiopeDHJ04 | Pyrginae         | 07-SRNP-65997       | MHMXS059-08           | JF763102                 |
| 3534              | Telemiades antiopeDHJ04 | Pyrginae         | 07-SRNP-4830        | MHMXS052-08           | JF763103                 |
| 3535              | Telemiades antiopeDHJ04 | Pyrginae         | 08-SRNP-90          | MHMXS042-08           | JF763104                 |
| 3536              | Telemiades antiopeDHJ04 | Pyrginae         | 08-SRNP-40014       | MHMXS035-08           | JF763106                 |
| 3537              | Telemiades antiopeDHJ04 | Pyrginae         | 08-SRNP-78          | MHMXS031-08           | JF763097                 |
| 3538              | Telemiades antiopeDHJ04 | Pyrginae         | 07-SRNP-4413        | MHMXR068-08           | JF763098                 |
| 3539              | Telemiades antiopeDHJ04 | Pyrginae         | 07-SRNP-4181        | MHMXR618-08           | JF763107                 |
| 3540              | Telemiades antiopeDHJ04 | Pyrginae         | 07-SRNP-66030       | MHMXR606-08           | JF763108                 |
| 3541              | Telemiades antiopeDHJ04 | Pyrginae         | 02-SRNP-5610        | XAA877-04             | DQ293494                 |
| 3542              | Telemiades antiopeDHJ04 | Pyrginae         | 07-SRNP-4622        | MHMXS036-08           | JF763105                 |
| 3543              | Telemiades antiopeDHJ04 | Pyrginae         | 08-SRNP-77          | MHMXT004-08           | JF763094                 |
| 3544              | Telemiades antiopeDHJ04 | Pyrginae         | 07-SRNP-3260        | MHMXP0932-08          | JF763109                 |
| 3545              | Telemiades antiopeDHJ04 | Pyrginae         | 07-SRNP-5121        | MHMXT001-08           | JF763096                 |
| 3546              | Telemiades antiopeDHJ04 | Pyrginae         | 02-SRNP-31972       | XAA793-04             | DQ293479                 |
| 3547              | Telemiades antiopeDHJ04 | Pyrginae         | 08-SRNP-20471       | MHMWX275-09           | JF754222                 |
| 3548              | Telemiades antiopeDHJ04 | Pyrginae         | 08-SRNP-65366       | MHMWX283-09           | JF754225                 |
| 3549              | Telemiades antiopeDHJ04 | Pyrginae         | 08-SRNP-20470       | MHMWX298-09           | JF754227                 |
| 3550              | Telemiades antiopeDHJ04 | Pyrginae         | 08-SRNP-85          | MHMWX299-09           | JF754228                 |
| 3551              | Telemiades antiopeDHJ04 | Pyrginae         | 08-SRNP-22138       | MHMXX611-09           | JF778524                 |
| 3552              | Telemiades antiopeDHJ04 | Pyrginae         | 08-SRNP-66178       | MHMXY967-09           | GU666556                 |
| 3553              | Telemiades antiopeDHJ04 | Pyrginae         | 08-SRNP-66078       | MHMXY968-09           | GU666557                 |
| 3554              | Telemiades antiopeDHJ04 | Pyrginae         | 08-SRNP-32462       | MHMXY971-09           | GU666552                 |
| 3555              | Telemiades antiopeDHJ02 | Pyrginae         | 08-SRNP-32857       | MHMYC470-09           | GU649868                 |
| 3556              | Telemiades antiopeDHJ02 | Pyrginae         | 02-SRNP-19299       | XAA785-04             | DQ293478                 |
| 3557              | Telemiades antiopeDHJ02 | Pyrginae         | 07-SRNP-32031       | MHAHL508-07           | JF763059                 |
| 3558              | Telemiades antiopeDHJ02 | Pyrginae         | 07-SRNP-4321        | MHMXS055-08           | JF763064                 |
| 3559              | Telemiades antiopeDHJ02 | Pyrginae         | 08-SRNP-31060       | MHMWX284-09           | JF754204                 |
| 3560              | Telemiades antiopeDHJ02 | Pyrginae         | 08-SRNP-66086       | MHMXY965-09           | GU666562                 |
| 3561              | Telemiades antiopeDHJ02 | Pyrginae         | 08-SRNP-66041       | MHMXY969-09           | GU666558                 |
| 3562              | Telemiades antiopeDHJ02 | Pyrginae         | 01-SRNP-25374       | XAA777-04             | DQ293477                 |
| 3563              | Telemiades antiopeDHJ02 | Pyrginae         | 07-SRNP-4412        | MHMXS049-08           | JF763067                 |
| 3564              | Telemiades antiopeDHJ02 | Pyrginae         | 07-SRNP-4814        | MHMXS044-08           | JF763069                 |
| 3565              | Telemiades antiopeDHJ02 | Pyrginae         | 07-SRNP-4822        | MHMXS037-08           | JF763070                 |
| 3566              | Telemiades antiopeDHJ02 | Pyrginae         | 07-SRNP-3864        | MHMXR609-08           | JF763073                 |
| 3567              | Telemiades antiopeDHJ02 | Pyrginae         | 06-SRNP-9304        | MHAHL452-07           | JF753182                 |
| 3568              | Telemiades antiopeDHJ02 | Pyrginae         | 00-SRNP-14600       | XAA926-04             | DQ293498                 |
| 3569              | Telemiades antiopeDHJ02 | Pyrginae         | 07-SRNP-42387       | MHMXP0915-08          | JF763077                 |
| 3570              | Telemiades antiopeDHJ02 | Pyrginae         | 07-SRNP-45352       | MHMXP0931-08          | JF763075                 |
| 3571              | Telemiades antiopeDHJ02 | Pyrginae         | 07-SRNP-4821        | MHMXS060-08           | JF763063                 |
| 3572              | Telemiades antiopeDHJ02 | Pyrginae         | 07-SRNP-42887       | MHMXS067-08           | JF763061                 |
| 3573              | Telemiades antiopeDHJ02 | Pyrginae         | 07-SRNP-3822        | MHMXS072-08           | JF763060                 |
| 3574              | Telemiades antiopeDHJ02 | Pyrginae         | 08-SRNP-2038        | MHMWX264-09           | JF754201                 |
| 3575              | Telemiades antiopeDHJ02 | Pyrginae         | 08-SRNP-40378       | MHMWX291-09           | JF754206                 |
| 3576              | Telemiades antiopeDHJ02 | Pyrginae         | 08-SRNP-31062       | MHMWX294-09           | JF754209                 |
| 3577              | Telemiades antiopeDHJ02 | Pyrginae         | 08-SRNP-1018        | MHMWX295-09           | JF754210                 |
| 3578              | Telemiades antiopeDHJ02 | Pyrginae         | 08-SRNP-5514        | MHMXY970-09           | GU666551                 |
| 3579              | Telemiades antiopeDHJ02 | Pyrginae         | 08-SRNP-72542       | MHMXY973-09           | GU666554                 |
| 3580              | Telemiades antiopeDHJ02 | Pyrginae         | 09-SRNP-40086       | MHMYC469-09           | GU649834                 |
| 3581              | Telemiades antiopeDHJ02 | Pyrginae         | 07-SRNP-1844        | MHAHL476-07           | JF763057                 |
| 3582              | Telemiades antiopeDHJ02 | Pyrginae         | 02-SRNP-1005        | XAA825-04             | DQ293484                 |
| 3583              | Telemiades antiopeDHJ02 | Pyrginae         | 02-SRNP-1008        | XAA761-04             | DQ293475                 |



| <b>Tree Order</b> | <b>Species</b>         | <b>Subfamily</b> | <b>ACG Sampleid</b> | <b>BOLD Processid</b> | <b>Genbank Accession</b> |
|-------------------|------------------------|------------------|---------------------|-----------------------|--------------------------|
| 3584              | Telemiades antiopDHJ02 | Pyrginae         | 02-SRNP-1004        | XAA834-04             | DQ293486                 |
| 3585              | Telemiades antiopDHJ02 | Pyrginae         | 02-SRNP-1451        | XAA826-04             | DQ293485                 |
| 3586              | Telemiades antiopDHJ02 | Pyrginae         | 08-SRNP-41239       | MHMXX612-09           | JF778523                 |
| 3587              | Telemiades antiopDHJ02 | Pyrginae         | 08-SRNP-1347        | MHMXXW301-09          | JF754212                 |
| 3588              | Telemiades antiopDHJ02 | Pyrginae         | 08-SRNP-40203       | MHMXXW297-09          | JF754211                 |
| 3589              | Telemiades antiopDHJ02 | Pyrginae         | 08-SRNP-30634       | MHMXXW293-09          | JF754208                 |
| 3590              | Telemiades antiopDHJ02 | Pyrginae         | 08-SRNP-40136       | MHMXXW292-09          | JF754207                 |
| 3591              | Telemiades antiopDHJ02 | Pyrginae         | 08-SRNP-520         | MHMXXW285-09          | JF754205                 |
| 3592              | Telemiades antiopDHJ02 | Pyrginae         | 08-SRNP-2122        | MHMXXW272-09          | JF754203                 |
| 3593              | Telemiades antiopDHJ02 | Pyrginae         | 08-SRNP-75          | MHMXXW266-09          | JF754202                 |
| 3594              | Telemiades antiopDHJ02 | Pyrginae         | 07-SRNP-4808        | MHMXXS066-08          | JF763062                 |
| 3595              | Telemiades antiopDHJ02 | Pyrginae         | 07-SRNP-4177        | MHMXXS051-08          | JF763065                 |
| 3596              | Telemiades antiopDHJ02 | Pyrginae         | 07-SRNP-4810        | MHMXXS050-08          | JF763066                 |
| 3597              | Telemiades antiopDHJ02 | Pyrginae         | 07-SRNP-4465        | MHMXXS045-08          | JF763068                 |
| 3598              | Telemiades antiopDHJ02 | Pyrginae         | 07-SRNP-5159        | MHMXXS034-08          | JF763071                 |
| 3599              | Telemiades antiopDHJ02 | Pyrginae         | 07-SRNP-4154        | MHMXR619-08           | JF763072                 |
| 3600              | Telemiades antiopDHJ02 | Pyrginae         | 02-SRNP-1007        | XAA934-04             | DQ293500                 |
| 3601              | Telemiades antiopDHJ02 | Pyrginae         | 02-SRNP-19206       | XAA870-04             | DQ293493                 |
| 3602              | Telemiades antiopDHJ02 | Pyrginae         | 02-SRNP-4634        | XAA809-04             | DQ293481                 |
| 3603              | Telemiades antiopDHJ02 | Pyrginae         | 07-SRNP-30338       | MHAHL489-07           | JF763058                 |
| 3604              | Telemiades antiopDHJ02 | Pyrginae         | 07-SRNP-3292        | MHMXXO935-08          | JF763074                 |
| 3605              | Telemiades antiopDHJ02 | Pyrginae         | 07-SRNP-42386       | MHMXXO916-08          | JF763076                 |
| 3606              | Telemiades antiopDHJ02 | Pyrginae         | 07-SRNP-42388       | MHMXXO911-08          | JF763078                 |
| 3607              | Telemiades antiopDHJ02 | Pyrginae         | 02-SRNP-1638        | XAA842-04             | DQ293487                 |
| 3608              | Telemiades antiopDHJ02 | Pyrginae         | 02-SRNP-1003        | XAA878-04             | DQ293495                 |
| 3609              | Telemiades antiopDHJ02 | Pyrginae         | 02-SRNP-19728       | CSCR462-04            | DQ293469                 |
| 3610              | Telemiades antiopDHJ02 | Pyrginae         | 09-SRNP-65787       | MHMYC471-09           | GU649863                 |
| 3611              | Telemiades antiopDHJ02 | Pyrginae         | 09-SRNP-69681       | MHMYH121-10           | HM887273                 |
| 3612              | Telemiades antiopDHJ03 | Pyrginae         | 03-SRNP-5635        | CSRII155-04           | DQ293472                 |
| 3613              | Telemiades antiopDHJ03 | Pyrginae         | 07-SRNP-3532        | MHMXXO930-08          | JF763092                 |
| 3614              | Telemiades antiopDHJ03 | Pyrginae         | 07-SRNP-5153        | MHMXXS062-08          | JF763083                 |
| 3615              | Telemiades antiopDHJ03 | Pyrginae         | 08-SRNP-56          | MHMXXS061-08          | JF763084                 |
| 3616              | Telemiades antiopDHJ03 | Pyrginae         | 07-SRNP-4621        | MHMXXS039-08          | JF763086                 |
| 3617              | Telemiades antiopDHJ03 | Pyrginae         | 08-SRNP-88          | MHMXXS032-08          | JF763087                 |
| 3618              | Telemiades antiopDHJ03 | Pyrginae         | 07-SRNP-65881       | MHMXR612-08           | JF763089                 |
| 3619              | Telemiades antiopDHJ03 | Pyrginae         | 07-SRNP-4322        | MHMXR607-08           | JF763090                 |
| 3620              | Telemiades antiopDHJ03 | Pyrginae         | 07-SRNP-65754       | MHMXR604-08           | JF763091                 |
| 3621              | Telemiades antiopDHJ03 | Pyrginae         | 07-SRNP-2288        | MHAHL494-07           | JF763080                 |
| 3622              | Telemiades antiopDHJ03 | Pyrginae         | 05-SRNP-31699       | MHAHL020-07           | JF763079                 |
| 3623              | Telemiades antiopDHJ03 | Pyrginae         | 07-SRNP-4816        | MHMXXS048-08          | JF763085                 |
| 3624              | Telemiades antiopDHJ03 | Pyrginae         | 07-SRNP-3834        | MHMXR613-08           | JF763088                 |
| 3625              | Telemiades antiopDHJ03 | Pyrginae         | 07-SRNP-3258        | MHMXXO910-08          | JF763093                 |
| 3626              | Telemiades antiopDHJ03 | Pyrginae         | 08-SRNP-53          | MHMXT005-08           | JF763082                 |
| 3627              | Telemiades antiopDHJ03 | Pyrginae         | 08-SRNP-94          | MHMXT007-08           | JF763081                 |
| 3628              | Telemiades antiopDHJ03 | Pyrginae         | 08-SRNP-212         | MHMXXW267-09          | JF754213                 |
| 3629              | Telemiades antiopDHJ03 | Pyrginae         | 08-SRNP-65345       | MHMXXW269-09          | JF754214                 |
| 3630              | Telemiades antiopDHJ03 | Pyrginae         | 08-SRNP-2235        | MHMXXW273-09          | JF754215                 |
| 3631              | Telemiades antiopDHJ03 | Pyrginae         | 08-SRNP-65187       | MHMXXW281-09          | JF754216                 |
| 3632              | Telemiades antiopDHJ03 | Pyrginae         | 08-SRNP-2052        | MHMXXW288-09          | JF754217                 |
| 3633              | Telemiades antiopDHJ03 | Pyrginae         | 08-SRNP-1022        | MHMXXW296-09          | JF754218                 |
| 3634              | Telemiades antiopDHJ03 | Pyrginae         | 08-SRNP-5335        | MHMXY966-09           | GU666555                 |
| 3635              | Telemiades antiopDHJ03 | Pyrginae         | 09-SRNP-80154       | MHMYH123-10           | HM887275                 |
| 3636              | Telemiades antiopDHJ01 | Pyrginae         | 03-SRNP-5756        | CSRII156-04           | DQ293473                 |
| 3637              | Telemiades antiopDHJ01 | Pyrginae         | 03-SRNP-5262        | CSCR423-04            | DQ293470                 |
| 3638              | Telemiades antiopDHJ01 | Pyrginae         | 07-SRNP-4829        | MHMXT010-08           | JF763018                 |
| 3639              | Telemiades antiopDHJ01 | Pyrginae         | 07-SRNP-42569       | MHMXR616-08           | JF763047                 |

| <b>Tree Order</b> | <b>Species</b>          | <b>Subfamily</b> | <b>ACG Sampleid</b> | <b>BOLD Processid</b> | <b>Genbank Accession</b> |
|-------------------|-------------------------|------------------|---------------------|-----------------------|--------------------------|
| 3640              | Telemiades antiopDHHJ01 | Pyrginae         | 07-SRNP-33538       | MHMXR603-08           | JF763053                 |
| 3641              | Telemiades antiopDHHJ01 | Pyrginae         | 02-SRNP-882         | XAA801-04             | DQ293480                 |
| 3642              | Telemiades antiopDHHJ01 | Pyrginae         | 02-SRNP-19458       | XAA862-04             | DQ293491                 |
| 3643              | Telemiades antiopDHHJ01 | Pyrginae         | 07-SRNP-4743        | MHMXS041-08           | JF763039                 |
| 3644              | Telemiades antiopDHHJ01 | Pyrginae         | 07-SRNP-5126        | MHMXS043-08           | JF763038                 |
| 3645              | Telemiades antiopDHHJ01 | Pyrginae         | 07-SRNP-4700        | MHMXS056-08           | JF763033                 |
| 3646              | Telemiades antiopDHHJ01 | Pyrginae         | 07-SRNP-4317        | MHMXS057-08           | JF763032                 |
| 3647              | Telemiades antiopDHHJ01 | Pyrginae         | 07-SRNP-4480        | MHMXS046-08           | JF763037                 |
| 3648              | Telemiades antiopDHHJ01 | Pyrginae         | 07-SRNP-4666        | MHMXS047-08           | JF763036                 |
| 3649              | Telemiades antiopDHHJ01 | Pyrginae         | 07-SRNP-41772       | MHAHL503-07           | JF763016                 |
| 3650              | Telemiades antiopDHHJ01 | Pyrginae         | 07-SRNP-41859       | MHAHL510-07           | JF763017                 |
| 3651              | Telemiades antiopDHHJ01 | Pyrginae         | 07-SRNP-32623       | MHAHL492-07           | JF763015                 |
| 3652              | Telemiades antiopDHHJ01 | Pyrginae         | 05-SRNP-2943        | MHAHL022-07           | JF763013                 |
| 3653              | Telemiades antiopDHHJ01 | Pyrginae         | 05-SRNP-31617       | MHAHL021-07           | JF763012                 |
| 3654              | Telemiades antiopDHHJ01 | Pyrginae         | 05-SRNP-31616       | MHAHL019-07           | JF763011                 |
| 3655              | Telemiades antiopDHHJ01 | Pyrginae         | 06-SRNP-22168       | MHAHK334-07           | JF761199                 |
| 3656              | Telemiades antiopDHHJ01 | Pyrginae         | 02-SRNP-19799       | XAA869-04             | DQ293492                 |
| 3657              | Telemiades antiopDHHJ01 | Pyrginae         | 02-SRNP-31830       | XAA861-04             | DQ293490                 |
| 3658              | Telemiades antiopDHHJ01 | Pyrginae         | 97-SRNP-6271        | XAA853-04             | DQ293488                 |
| 3659              | Telemiades antiopDHHJ01 | Pyrginae         | 98-SRNP-4297        | XAA927-04             | DQ293499                 |
| 3660              | Telemiades antiopDHHJ01 | Pyrginae         | 01-SRNP-9439        | XAA918-04             | DQ293497                 |
| 3661              | Telemiades antiopDHHJ01 | Pyrginae         | 98-SRNP-4296        | XAA894-04             | DQ293496                 |
| 3662              | Telemiades antiopDHHJ01 | Pyrginae         | 07-SRNP-65162       | MHAHL487-07           | JF763014                 |
| 3663              | Telemiades antiopDHHJ01 | Pyrginae         | 07-SRNP-4438        | MHMXR610-08           | JF763050                 |
| 3664              | Telemiades antiopDHHJ01 | Pyrginae         | 08-SRNP-74          | MHMXT006-08           | JF763021                 |
| 3665              | Telemiades antiopDHHJ01 | Pyrginae         | 07-SRNP-3358        | MHMXP0929-08          | JF763054                 |
| 3666              | Telemiades antiopDHHJ01 | Pyrginae         | 07-SRNP-5012        | MHMXT002-08           | JF763022                 |
| 3667              | Telemiades antiopDHHJ01 | Pyrginae         | 07-SRNP-3831        | MHMXP0921-08          | JF763055                 |
| 3668              | Telemiades antiopDHHJ01 | Pyrginae         | 07-SRNP-3359        | MHMXP0912-08          | JF763056                 |
| 3669              | Telemiades antiopDHHJ01 | Pyrginae         | 02-SRNP-31831       | XAA769-04             | DQ293476                 |
| 3670              | Telemiades antiopDHHJ01 | Pyrginae         | 02-SRNP-19598       | XAA854-04             | DQ293489                 |
| 3671              | Telemiades antiopDHHJ01 | Pyrginae         | 02-SRNP-19126       | XAA753-04             | DQ293474                 |
| 3672              | Telemiades antiopDHHJ01 | Pyrginae         | 02-SRNP-6041        | XAA817-04             | DQ293482                 |
| 3673              | Telemiades antiopDHHJ01 | Pyrginae         | 01-SRNP-23390       | XAA818-04             | DQ293483                 |
| 3674              | Telemiades antiopDHHJ01 | Pyrginae         | 07-SRNP-4015        | MHMXR615-08           | JF763048                 |
| 3675              | Telemiades antiopDHHJ01 | Pyrginae         | 07-SRNP-4768        | MHMXT008-08           | JF763020                 |
| 3676              | Telemiades antiopDHHJ01 | Pyrginae         | 07-SRNP-5014        | MHMXT009-08           | JF763019                 |
| 3677              | Telemiades antiopDHHJ01 | Pyrginae         | 07-SRNP-4178        | MHMXR620-08           | JF763045                 |
| 3678              | Telemiades antiopDHHJ01 | Pyrginae         | 07-SRNP-4705        | MHMXR621-08           | JF763044                 |
| 3679              | Telemiades antiopDHHJ01 | Pyrginae         | 07-SRNP-4179        | MHMXR622-08           | JF763043                 |
| 3680              | Telemiades antiopDHHJ01 | Pyrginae         | 08-SRNP-72          | MHMXS029-08           | JF763024                 |
| 3681              | Telemiades antiopDHHJ01 | Pyrginae         | 08-SRNP-84          | MHMXS030-08           | JF763023                 |
| 3682              | Telemiades antiopDHHJ01 | Pyrginae         | 07-SRNP-4472        | MHMXS033-08           | JF763042                 |
| 3683              | Telemiades antiopDHHJ01 | Pyrginae         | 07-SRNP-4747        | MHMXS038-08           | JF763041                 |
| 3684              | Telemiades antiopDHHJ01 | Pyrginae         | 07-SRNP-5047        | MHMXS040-08           | JF763040                 |
| 3685              | Telemiades antiopDHHJ01 | Pyrginae         | 07-SRNP-4146        | MHMXS053-08           | JF763035                 |
| 3686              | Telemiades antiopDHHJ01 | Pyrginae         | 07-SRNP-4186        | MHMXS054-08           | JF763034                 |
| 3687              | Telemiades antiopDHHJ01 | Pyrginae         | 07-SRNP-4665        | MHMXS058-08           | JF763031                 |
| 3688              | Telemiades antiopDHHJ01 | Pyrginae         | 07-SRNP-65996       | MHMXS064-08           | JF763030                 |
| 3689              | Telemiades antiopDHHJ01 | Pyrginae         | 07-SRNP-4466        | MHMXS068-08           | JF763029                 |
| 3690              | Telemiades antiopDHHJ01 | Pyrginae         | 07-SRNP-42746       | MHMXS069-08           | JF763028                 |
| 3691              | Telemiades antiopDHHJ01 | Pyrginae         | 07-SRNP-4202        | MHMXS070-08           | JF763027                 |
| 3692              | Telemiades antiopDHHJ01 | Pyrginae         | 08-SRNP-65077       | MHMXS071-08           | JF763026                 |
| 3693              | Telemiades antiopDHHJ01 | Pyrginae         | 08-SRNP-2032        | MHMXP274-09           | JF754193                 |
| 3694              | Telemiades antiopDHHJ01 | Pyrginae         | 08-SRNP-20474       | MHMXP277-09           | JF754194                 |
| 3695              | Telemiades antiopDHHJ01 | Pyrginae         | 08-SRNP-241         | MHMXP280-09           | JF754195                 |

| Tree Order | Species                 | Subfamily | ACG Sampleid  | BOLD Processid | Genbank Accession |
|------------|-------------------------|-----------|---------------|----------------|-------------------|
| 3696       | Telemiades antiopeDHJ01 | Pyrginae  | 08-SRNP-21085 | MHMWXW282-09   | JF754196          |
| 3697       | Telemiades antiopeDHJ01 | Pyrginae  | 07-SRNP-23802 | MHMXR605-08    | JF763052          |
| 3698       | Telemiades antiopeDHJ01 | Pyrginae  | 07-SRNP-4183  | MHMXR608-08    | JF763051          |
| 3699       | Telemiades antiopeDHJ01 | Pyrginae  | 07-SRNP-3832  | MHMXR611-08    | JF763049          |
| 3700       | Telemiades antiopeDHJ01 | Pyrginae  | 07-SRNP-42570 | MHMXR617-08    | JF763046          |
| 3701       | Telemiades antiopeDHJ01 | Pyrginae  | 08-SRNP-593   | MHMWXW287-09   | JF754197          |
| 3702       | Telemiades antiopeDHJ01 | Pyrginae  | 08-SRNP-31223 | MHMWXW289-09   | JF754198          |
| 3703       | Telemiades antiopeDHJ01 | Pyrginae  | 07-SRNP-4831  | MHMXS095-08    | JF763025          |
| 3704       | Telemiades antiopeDHJ01 | Pyrginae  | 08-SRNP-1861  | MHMWXW265-09   | JF754190          |
| 3705       | Telemiades antiopeDHJ01 | Pyrginae  | 08-SRNP-65346 | MHMWXW268-09   | JF754191          |
| 3706       | Telemiades antiopeDHJ01 | Pyrginae  | 08-SRNP-2236  | MHMWXW270-09   | JF754192          |
| 3707       | Telemiades antiopeDHJ01 | Pyrginae  | 08-SRNP-40725 | MHMWXW290-09   | JF754199          |
| 3708       | Telemiades antiopeDHJ01 | Pyrginae  | 08-SRNP-1849  | MHMWXW300-09   | JF754200          |
| 3709       | Telemiades antiopeDHJ01 | Pyrginae  | 08-SRNP-66184 | MHMXY964-09    | GU666561          |
| 3710       | Telemiades antiopeDHJ01 | Pyrginae  | 08-SRNP-22019 | MHMXY972-09    | GU666553          |
| 3711       | Telemiades antiopeDHJ01 | Pyrginae  | 09-SRNP-66051 | MHMYH120-10    | HM887272          |
| 3712       | Telemiades antiopeDHJ01 | Pyrginae  | 09-SRNP-44901 | MHMYG1999-10   | JF751944          |
| 3713       | Telemiades Burns03      | Pyrginae  | 06-SRNP-43497 | MHAHJ484-07    | JF753183          |
| 3714       | Cogia eluina            | Pyrginae  | 04-SRNP-50096 | MHAHL103-07    | JF761979          |
| 3715       | Cogia eluina            | Pyrginae  | 04-SRNP-50103 | MHAHL102-07    | JF761978          |
| 3716       | Cogia eluina            | Pyrginae  | 05-SRNP-64296 | MHAHH527-06    | GU155339          |
| 3717       | Cogia eluina            | Pyrginae  | 05-SRNP-64303 | MHAHH528-06    | GU155340          |
| 3718       | Cogia eluina            | Pyrginae  | 01-SRNP-16128 | CSCR078-04     | DQ292216          |
| 3719       | Cogia eluina            | Pyrginae  | 02-SRNP-32045 | CSCR080-04     | DQ292218          |
| 3720       | Cogia eluina            | Pyrginae  | 04-SRNP-15978 | MHAHF860-06    | GU150345          |
| 3721       | Cogia eluina            | Pyrginae  | 02-SRNP-17121 | CSCR079-04     | DQ292217          |
| 3722       | Cogia eluina            | Pyrginae  | 91-SRNP-1362  | CSCR077-04     | DQ292215          |
| 3723       | Cogia eluina            | Pyrginae  | 04-SRNP-16107 | MHAHF861-06    | GU150344          |
| 3724       | Cogia eluina            | Pyrginae  | 06-SRNP-21562 | MHAHK360-07    | JF760588          |
| 3725       | Cogia eluina            | Pyrginae  | 05-SRNP-56836 | MHAHF863-06    | GU150348          |
| 3726       | Cogia eluina            | Pyrginae  | 05-SRNP-56837 | MHAHF862-06    | GU150347          |
| 3727       | Cogia eluina            | Pyrginae  | 04-SRNP-16191 | MHAHF859-06    | GU150343          |
| 3728       | Cogia eluina            | Pyrginae  | 04-SRNP-16194 | MHAHF858-06    | GU150346          |
| 3729       | Cogia eluina            | Pyrginae  | 04-SRNP-14135 | MHAHE073-05    | GU149557          |
| 3730       | Cogia eluina            | Pyrginae  | 04-SRNP-14051 | MHAHE072-05    | GU149556          |
| 3731       | Cogia eluina            | Pyrginae  | 04-SRNP-13940 | MHAHE071-05    | GU149558          |
| 3732       | Cogia eluina            | Pyrginae  | 05-SRNP-12004 | MHAHL104-07    | JF761980          |
| 3733       | Cogia eluina            | Pyrginae  | 07-SRNP-22100 | MHAHL142-07    | JF761981          |
| 3734       | Telemiades avitus       | Pyrginae  | 05-SRNP-55667 | MHAHD388-05    | GU161886          |
| 3735       | Telemiades avitus       | Pyrginae  | 07-SRNP-41266 | MHAHL261-07    | JF763110          |
| 3736       | Telemiades avitus       | Pyrginae  | 08-SRNP-65922 | MHMXX610-09    | JF778525          |
| 3737       | Heliopetes lavianaDHJ01 | Pyrginae  | 07-SRNP-55300 | MHAHK730-07    | JF760785          |
| 3738       | Heliopetes lavianaDHJ01 | Pyrginae  | 09-SRNP-57620 | MHMYG2382-10   | HM885806          |
| 3739       | Polygonus savignyDHJ01  | Pyrginae  | 01-SRNP-14590 | MHAHK610-07    | JF761049          |
| 3740       | Polygonus savignyDHJ01  | Pyrginae  | 06-SRNP-2530  | MHAHG740-06    | GU151573          |
| 3741       | Polygonus savignyDHJ01  | Pyrginae  | 02-SRNP-16605 | MHAHJ150-07    | JF753071          |
| 3742       | Polygonus savignyDHJ01  | Pyrginae  | 03-SRNP-15205 | MHAHJ151-07    | JF753072          |
| 3743       | Polygonus savignyDHJ01  | Pyrginae  | 91-SRNP-954   | MHAHK605-07    | JF761046          |
| 3744       | Polygonus savignyDHJ01  | Pyrginae  | 03-SRNP-16118 | MHAHJ152-07    | JF753073          |
| 3745       | Polygonus savignyDHJ01  | Pyrginae  | 04-SRNP-46430 | MHAHC159-05    | DQ293046          |
| 3746       | Polygonus savignyDHJ01  | Pyrginae  | 04-SRNP-46324 | MHAHC167-05    | DQ293047          |
| 3747       | Polygonus savignyDHJ01  | Pyrginae  | 06-SRNP-45458 | MHAHI165-06    | GU156083          |
| 3748       | Polygonus savignyDHJ01  | Pyrginae  | 02-SRNP-1520  | MHAHJ153-07    | JF753074          |
| 3749       | Polygonus savignyDHJ01  | Pyrginae  | 01-SRNP-14675 | MHAHK606-07    | JF761047          |
| 3750       | Polygonus savignyDHJ01  | Pyrginae  | 02-SRNP-17731 | MHAHK607-07    | JF761048          |
| 3751       | Polygonus savignyDHJ01  | Pyrginae  | 01-SRNP-14738 | MHAHK611-07    | JF761050          |

| <b>Tree Order</b> | <b>Species</b>         | <b>Subfamily</b> | <b>ACG Sampleid</b> | <b>BOLD Processid</b> | <b>Genbank Accession</b> |
|-------------------|------------------------|------------------|---------------------|-----------------------|--------------------------|
| 3752              | Polygonus savignyDHJ02 | Pyrginae         | 06-SRNP-16949       | MHAHK055-07           | JF761051                 |
| 3753              | Polygonus savignyDHJ02 | Pyrginae         | 06-SRNP-56369       | MHAHH454-06           | GU155457                 |
| 3754              | Polygonus savignyDHJ02 | Pyrginae         | 06-SRNP-56370       | MHAHI164-06           | GU156084                 |
| 3755              | Polygonus savignyDHJ02 | Pyrginae         | 01-SRNP-14737       | MHAHJ147-07           | JF753075                 |
| 3756              | Polygonus savignyDHJ02 | Pyrginae         | 01-SRNP-14672       | MHAHJ148-07           | JF753076                 |
| 3757              | Polygonus savignyDHJ02 | Pyrginae         | 01-SRNP-14673       | MHAHJ149-07           | JF753077                 |
| 3758              | Polygonus savignyDHJ02 | Pyrginae         | 01-SRNP-14671       | MHAHJ154-07           | JF753078                 |
| 3759              | Polygonus savignyDHJ02 | Pyrginae         | 01-SRNP-14670       | MHAHK601-07           | JF761052                 |
| 3760              | Polygonus savignyDHJ02 | Pyrginae         | 01-SRNP-14669       | MHAHK602-07           | JF761053                 |
| 3761              | Polygonus savignyDHJ02 | Pyrginae         | 01-SRNP-14668       | MHAHK603-07           | JF761054                 |
| 3762              | Polygonus savignyDHJ02 | Pyrginae         | 01-SRNP-14674       | MHAHK604-07           | JF761055                 |
| 3763              | Polygonus savignyDHJ02 | Pyrginae         | 01-SRNP-14676       | MHAHK608-07           | JF761056                 |
| 3764              | Polygonus savignyDHJ02 | Pyrginae         | 91-SRNP-431         | MHAHK609-07           | JF761057                 |
| 3765              | Polygonus savignyDHJ02 | Pyrginae         | 08-SRNP-1689        | MHMXX1029-09          | JF778405                 |
| 3766              | Polygonus savignyDHJ02 | Pyrginae         | 08-SRNP-1690        | MHMXX1030-09          | JF778406                 |
| 3767              | Polygonus leo          | Pyrginae         | 05-SRNP-1988        | MHAHE463-05           | GU149848                 |
| 3768              | Polygonus leo          | Pyrginae         | 05-SRNP-45857       | MHAHF543-06           | GU150706                 |
| 3769              | Polygonus leo          | Pyrginae         | 04-SRNP-46889       | MHAHC103-05           | DQ293045                 |
| 3770              | Polygonus leo          | Pyrginae         | 05-SRNP-1445        | MHAHE465-05           | GU149850                 |
| 3771              | Polygonus leo          | Pyrginae         | 05-SRNP-1699        | MHAHF544-06           | GU150708                 |
| 3772              | Polygonus leo          | Pyrginae         | 05-SRNP-63797       | MHAHF681-06           | GU150709                 |
| 3773              | Polygonus leo          | Pyrginae         | 05-SRNP-1444        | MHAHE464-05           | GU149849                 |
| 3774              | Polygonus leo          | Pyrginae         | 05-SRNP-1448        | MHAHE466-05           | GU149851                 |
| 3775              | Polygonus leo          | Pyrginae         | 05-SRNP-1987        | MHAHF545-06           | GU150707                 |
| 3776              | Polygonus leo          | Pyrginae         | 08-SRNP-55973       | MHMXX1032-09          | JF778403                 |
| 3777              | Polygonus leo          | Pyrginae         | 06-SRNP-15696       | MHAHH452-06           | GU155455                 |
| 3778              | Polygonus leo          | Pyrginae         | 06-SRNP-15549       | MHAHH451-06           | GU155456                 |
| 3779              | Polygonus leo          | Pyrginae         | 06-SRNP-15550       | MHAHH455-06           | GU155454                 |
| 3780              | Polygonus leo          | Pyrginae         | 06-SRNP-15695       | MHAHK054-07           | JF761045                 |
| 3781              | Polygonus leo          | Pyrginae         | 08-SRNP-55955       | MHMXX1033-09          | JF778404                 |
| 3782              | Polygonus leo          | Pyrginae         | 04-SRNP-46785       | MHAHC095-05           | DQ293044                 |
| 3783              | Polygonus leo          | Pyrginae         | 09-SRNP-14024       | MHMYG2041-10          | HM885443                 |
| 3784              | Astraptus INGCUP       | Eudaminae        | 97-SRNP-6203        | EPAF127-03            | AY666765                 |
| 3785              | Astraptus INGCUP       | Eudaminae        | 00-SRNP-20677       | EPAF228-03            | AY666910                 |
| 3786              | Astraptus INGCUP       | Eudaminae        | 07-SRNP-4771        | MHMXT033-08           | JF761556                 |
| 3787              | Astraptus INGCUP       | Eudaminae        | 08-SRNP-1416        | MHMXX154-09           | JF753689                 |
| 3788              | Astraptus INGCUP       | Eudaminae        | 08-SRNP-1414        | MHMXX151-09           | JF753688                 |
| 3789              | Astraptus INGCUP       | Eudaminae        | 08-SRNP-82          | MHMXX150-09           | JF753687                 |
| 3790              | Astraptus INGCUP       | Eudaminae        | 08-SRNP-130         | MHMXX148-09           | JF753685                 |
| 3791              | Astraptus INGCUP       | Eudaminae        | 95-SRNP-8692        | EPAF087-03            | AY666844                 |
| 3792              | Astraptus INGCUP       | Eudaminae        | 01-SRNP-5312        | EPAF241-03            | AY666665                 |
| 3793              | Astraptus INGCUP       | Eudaminae        | 02-SRNP-29904       | EPAF287-03            | AY666908                 |
| 3794              | Astraptus INGCUP       | Eudaminae        | 01-SRNP-508         | EPAF231-03            | AY666726                 |
| 3795              | Astraptus INGCUP       | Eudaminae        | 99-SRNP-4982        | EPAF182-03            | AY666600                 |
| 3796              | Astraptus INGCUP       | Eudaminae        | 96-SRNP-9864        | EPAF099-03            | AY666834                 |
| 3797              | Astraptus INGCUP       | Eudaminae        | 98-SRNP-6438        | EPAF158-03            | AY666692                 |
| 3798              | Astraptus INGCUP       | Eudaminae        | 97-SRNP-6595        | EPAF136-03            | AY666739                 |
| 3799              | Astraptus INGCUP       | Eudaminae        | 99-SRNP-4173        | EPAF175-03            | AY666626                 |
| 3800              | Astraptus INGCUP       | Eudaminae        | 02-SRNP-24431       | EPAF360-03            | AY666953                 |
| 3801              | Astraptus INGCUP       | Eudaminae        | 97-SRNP-6205        | EPAF130-03            | AY666825                 |
| 3802              | Astraptus INGCUP       | Eudaminae        | 02-SRNP-9735        | EPAF283-03            | AY666615                 |
| 3803              | Astraptus INGCUP       | Eudaminae        | 02-SRNP-20351       | EPAF359-03            | AY666962                 |
| 3804              | Astraptus INGCUP       | Eudaminae        | 02-SRNP-19906       | EPAF364-03            | AY667031                 |
| 3805              | Astraptus INGCUP       | Eudaminae        | 02-SRNP-20353       | EPAF372-03            | AY666796                 |
| 3806              | Astraptus INGCUP       | Eudaminae        | 02-SRNP-9734        | EPAF274-03            | AY666848                 |
| 3807              | Astraptus INGCUP       | Eudaminae        | 99-SRNP-5123        | EPAF191-03            | AY667023                 |

| <b>Tree Order</b> | <b>Species</b>   | <b>Subfamily</b> | <b>ACG Sampleid</b> | <b>BOLD Processid</b> | <b>Genbank Accession</b> |
|-------------------|------------------|------------------|---------------------|-----------------------|--------------------------|
| 3808              | Astraptes INGCUP | Eudaminae        | 99-SRNP-4985        | EPAF189-03            | AY667058                 |
| 3809              | Astraptes INGCUP | Eudaminae        | 97-SRNP-6231        | EPAF124-03            | AY666774                 |
| 3810              | Astraptes INGCUP | Eudaminae        | 99-SRNP-5917        | EPAF192-03            | AY667033                 |
| 3811              | Astraptes INGCUP | Eudaminae        | 95-SRNP-4448        | EPAF071-03            | AY666873                 |
| 3812              | Astraptes INGCUP | Eudaminae        | 97-SRNP-6024        | EPAF122-03            | AY666773                 |
| 3813              | Astraptes INGCUP | Eudaminae        | 01-SRNP-1966        | EPAF237-03            | AY666682                 |
| 3814              | Astraptes INGCUP | Eudaminae        | 01-SRNP-1389        | EPAF235-03            | AY666705                 |
| 3815              | Astraptes INGCUP | Eudaminae        | 01-SRNP-710         | EPAF233-03            | AY666824                 |
| 3816              | Astraptes INGCUP | Eudaminae        | 02-SRNP-19350       | EPAF299-03            | AY667038                 |
| 3817              | Astraptes INGCUP | Eudaminae        | 02-SRNP-21515       | EPAF371-03            | AY666797                 |
| 3818              | Astraptes INGCUP | Eudaminae        | 97-SRNP-7123        | EPAF152-03            | AY666713                 |
| 3819              | Astraptes INGCUP | Eudaminae        | 01-SRNP-947         | EPAF234-03            | AY666933                 |
| 3820              | Astraptes INGCUP | Eudaminae        | 97-SRNP-7160        | EPAF157-03            | AY666696                 |
| 3821              | Astraptes INGCUP | Eudaminae        | 93-SRNP-2396        | EPAF029-03            | AY666915                 |
| 3822              | Astraptes INGCUP | Eudaminae        | 00-SRNP-15880       | EPAF218-03            | AY666941                 |
| 3823              | Astraptes INGCUP | Eudaminae        | 93-SRNP-2622        | EPAF032-03            | AY667027                 |
| 3824              | Astraptes INGCUP | Eudaminae        | 93-SRNP-2796        | EPAF035-03            | AY666901                 |
| 3825              | Astraptes INGCUP | Eudaminae        | 99-SRNP-10568       | EPAF197-03            | AY666916                 |
| 3826              | Astraptes INGCUP | Eudaminae        | 02-SRNP-32205       | EPAF314-03            | AY667017                 |
| 3827              | Astraptes INGCUP | Eudaminae        | 92-SRNP-3026        | EPAF018-03            | AY666926                 |
| 3828              | Astraptes INGCUP | Eudaminae        | 91-SRNP-2219        | EPAF009-03            | AY666936                 |
| 3829              | Astraptes INGCUP | Eudaminae        | 00-SRNP-2547        | EPAF212-03            | AY666960                 |
| 3830              | Astraptes INGCUP | Eudaminae        | 02-SRNP-32206       | EPAF310-03            | AY667026                 |
| 3831              | Astraptes INGCUP | Eudaminae        | 02-SRNP-19576       | EPAF320-03            | AY667018                 |
| 3832              | Astraptes INGCUP | Eudaminae        | 02-SRNP-20092       | EPAF366-03            | AY666809                 |
| 3833              | Astraptes INGCUP | Eudaminae        | 96-SRNP-934         | EPAF093-03            | AY666842                 |
| 3834              | Astraptes INGCUP | Eudaminae        | 02-SRNP-19721       | EPAF337-03            | AY666991                 |
| 3835              | Astraptes INGCUP | Eudaminae        | 98-SRNP-6516        | EPAF168-03            | AY666657                 |
| 3836              | Astraptes INGCUP | Eudaminae        | 02-SRNP-29906       | EPAF291-03            | AY666814                 |
| 3837              | Astraptes INGCUP | Eudaminae        | 98-SRNP-6370        | EPAF165-03            | AY666674                 |
| 3838              | Astraptes INGCUP | Eudaminae        | 94-SRNP-4843        | EPAF056-03            | AY666876                 |
| 3839              | Astraptes INGCUP | Eudaminae        | 02-SRNP-32204       | EPAF477-03            | AY666625                 |
| 3840              | Astraptes INGCUP | Eudaminae        | 92-SRNP-3121        | EPAF017-03            | AY666928                 |
| 3841              | Astraptes INGCUP | Eudaminae        | 99-SRNP-10560       | EPAF195-03            | AY667004                 |
| 3842              | Astraptes INGCUP | Eudaminae        | 94-SRNP-3011        | EPAF055-03            | AY666890                 |
| 3843              | Astraptes INGCUP | Eudaminae        | 00-SRNP-15081       | EPAF215-03            | AY666966                 |
| 3844              | Astraptes INGCUP | Eudaminae        | 94-SRNP-4958        | EPAF054-03            | AY666896                 |
| 3845              | Astraptes INGCUP | Eudaminae        | 96-SRNP-6841.1      | EPAF098-03            | AY666820                 |
| 3846              | Astraptes INGCUP | Eudaminae        | 08-SRNP-5592        | MHMX1115-09           | GU666430                 |
| 3847              | Astraptes INGCUP | Eudaminae        | 08-SRNP-1415        | MHMX182-09            | JF753684                 |
| 3848              | Astraptes INGCUP | Eudaminae        | 07-SRNP-42970       | MHMX179-09            | JF753683                 |
| 3849              | Astraptes INGCUP | Eudaminae        | 08-SRNP-21067       | MHMX172-09            | JF753682                 |
| 3850              | Astraptes INGCUP | Eudaminae        | 08-SRNP-65396       | MHMX168-09            | JF753681                 |
| 3851              | Astraptes INGCUP | Eudaminae        | 08-SRNP-70409       | MHMX167-09            | JF753680                 |
| 3852              | Astraptes INGCUP | Eudaminae        | 08-SRNP-2460        | MHMX166-09            | JF753679                 |
| 3853              | Astraptes INGCUP | Eudaminae        | 08-SRNP-1900        | MHMX165-09            | JF753678                 |
| 3854              | Astraptes INGCUP | Eudaminae        | 07-SRNP-61013       | MHMX164-09            | JF753677                 |
| 3855              | Astraptes INGCUP | Eudaminae        | 08-SRNP-1792        | MHMX163-09            | JF753676                 |
| 3856              | Astraptes INGCUP | Eudaminae        | 08-SRNP-40658       | MHMX162-09            | JF753675                 |
| 3857              | Astraptes INGCUP | Eudaminae        | 08-SRNP-81          | MHMX161-09            | JF753674                 |
| 3858              | Astraptes INGCUP | Eudaminae        | 08-SRNP-280         | MHMX160-09            | JF753673                 |
| 3859              | Astraptes INGCUP | Eudaminae        | 08-SRNP-1417        | MHMX158-09            | JF753671                 |
| 3860              | Astraptes INGCUP | Eudaminae        | 07-SRNP-5172        | MHMX157-09            | JF753670                 |
| 3861              | Astraptes INGCUP | Eudaminae        | 08-SRNP-1901        | MHMX156-09            | JF753690                 |
| 3862              | Astraptes INGCUP | Eudaminae        | 07-SRNP-42840       | MHMX039-08            | JF761553                 |
| 3863              | Astraptes INGCUP | Eudaminae        | 07-SRNP-5170        | MHMX016-08            | JF761572                 |

| <b>Tree Order</b> | <b>Species</b>   | <b>Subfamily</b> | <b>ACG Sampleid</b> | <b>BOLD Processid</b> | <b>Genbank Accession</b> |
|-------------------|------------------|------------------|---------------------|-----------------------|--------------------------|
| 3864              | Astraptes INGCUP | Eudaminae        | 08-SRNP-59          | MHMXT014-08           | JF761573                 |
| 3865              | Astraptes INGCUP | Eudaminae        | 07-SRNP-45415       | MHMXR730-08           | JF761575                 |
| 3866              | Astraptes INGCUP | Eudaminae        | 07-SRNP-58527       | MHMXR727-08           | JF761576                 |
| 3867              | Astraptes INGCUP | Eudaminae        | 07-SRNP-3511        | MHMXO870-08           | JF761577                 |
| 3868              | Astraptes INGCUP | Eudaminae        | 07-SRNP-45414       | MHMXO856-08           | JF761578                 |
| 3869              | Astraptes INGCUP | Eudaminae        | 07-SRNP-58050       | MHMXO848-08           | JF761581                 |
| 3870              | Astraptes INGCUP | Eudaminae        | 07-SRNP-3512        | MHMXO838-08           | JF761582                 |
| 3871              | Astraptes INGCUP | Eudaminae        | 07-SRNP-21910       | MHAHL294-07           | JF761547                 |
| 3872              | Astraptes INGCUP | Eudaminae        | 07-SRNP-1753        | MHAHL287-07           | JF761545                 |
| 3873              | Astraptes INGCUP | Eudaminae        | 07-SRNP-1790        | MHAHL283-07           | JF761543                 |
| 3874              | Astraptes INGCUP | Eudaminae        | 07-SRNP-40141       | MHMXX342-07           | JF761583                 |
| 3875              | Astraptes INGCUP | Eudaminae        | 07-SRNP-579         | MHMXX340-07           | JF761584                 |
| 3876              | Astraptes INGCUP | Eudaminae        | 07-SRNP-1286        | MHMXX335-07           | JF761585                 |
| 3877              | Astraptes INGCUP | Eudaminae        | 07-SRNP-1285        | MHMXX334-07           | JF761586                 |
| 3878              | Astraptes INGCUP | Eudaminae        | 07-SRNP-380         | MHAHK275-07           | JF760357                 |
| 3879              | Astraptes INGCUP | Eudaminae        | 07-SRNP-381         | MHAHK274-07           | JF760356                 |
| 3880              | Astraptes INGCUP | Eudaminae        | 06-SRNP-9898        | MHAHK250-07           | JF760354                 |
| 3881              | Astraptes INGCUP | Eudaminae        | 06-SRNP-9899        | MHAHK249-07           | JF760353                 |
| 3882              | Astraptes INGCUP | Eudaminae        | 06-SRNP-46318       | MHAHJ937-07           | JF752404                 |
| 3883              | Astraptes INGCUP | Eudaminae        | 06-SRNP-34320       | MHAHJ814-07           | JF752403                 |
| 3884              | Astraptes INGCUP | Eudaminae        | 06-SRNP-8910        | MHAHJ803-07           | JF752401                 |
| 3885              | Astraptes INGCUP | Eudaminae        | 06-SRNP-34321       | MHAHJ797-07           | JF752400                 |
| 3886              | Astraptes INGCUP | Eudaminae        | 06-SRNP-46151       | MHAHJ669-07           | JF752399                 |
| 3887              | Astraptes INGCUP | Eudaminae        | 06-SRNP-35256       | MHAHJ623-07           | JF752398                 |
| 3888              | Astraptes INGCUP | Eudaminae        | 06-SRNP-8752        | MHAHJ584-07           | JF752395                 |
| 3889              | Astraptes INGCUP | Eudaminae        | 04-SRNP-46483       | MHAHH383-06           | GU154997                 |
| 3890              | Astraptes INGCUP | Eudaminae        | 04-SRNP-40688       | MHAHH380-06           | GU155001                 |
| 3891              | Astraptes INGCUP | Eudaminae        | 04-SRNP-46477       | MHAHH378-06           | GU154998                 |
| 3892              | Astraptes INGCUP | Eudaminae        | 04-SRNP-60805       | MHAHH367-06           | GU154996                 |
| 3893              | Astraptes INGCUP | Eudaminae        | 03-SRNP-5634        | MHAHH291-06           | GU154992                 |
| 3894              | Astraptes INGCUP | Eudaminae        | 05-SRNP-48590       | MHAHG478-06           | GU151125                 |
| 3895              | Astraptes INGCUP | Eudaminae        | 05-SRNP-58120       | MHAHG436-06           | GU151123                 |
| 3896              | Astraptes INGCUP | Eudaminae        | 05-SRNP-40683       | MHAHG413-06           | GU151122                 |
| 3897              | Astraptes INGCUP | Eudaminae        | 05-SRNP-2221        | MHAHG384-06           | GU151120                 |
| 3898              | Astraptes INGCUP | Eudaminae        | 06-SRNP-55334       | MHAHG174-06           | GU151118                 |
| 3899              | Astraptes INGCUP | Eudaminae        | 07-SRNP-4895        | MHMXT024-08           | JF761565                 |
| 3900              | Astraptes INGCUP | Eudaminae        | 07-SRNP-4323        | MHMXT030-08           | JF761559                 |
| 3901              | Astraptes INGCUP | Eudaminae        | 07-SRNP-4552        | MHMXT042-08           | JF761550                 |
| 3902              | Astraptes INGCUP | Eudaminae        | 07-SRNP-4225        | MHMXT031-08           | JF761558                 |
| 3903              | Astraptes INGCUP | Eudaminae        | 07-SRNP-42991       | MHMXT017-08           | JF761571                 |
| 3904              | Astraptes INGCUP | Eudaminae        | 07-SRNP-4229        | MHMXT021-08           | JF761568                 |
| 3905              | Astraptes INGCUP | Eudaminae        | 07-SRNP-46516       | MHMXT013-08           | JF761574                 |
| 3906              | Astraptes INGCUP | Eudaminae        | 07-SRNP-5013        | MHMXT018-08           | JF761570                 |
| 3907              | Astraptes INGCUP | Eudaminae        | 07-SRNP-4884        | MHMXT019-08           | JF761569                 |
| 3908              | Astraptes INGCUP | Eudaminae        | 06-SRNP-31876       | MHAHH484-06           | GU155003                 |
| 3909              | Astraptes INGCUP | Eudaminae        | 99-SRNP-4980        | EPAF190-03            | AY667025                 |
| 3910              | Astraptes INGCUP | Eudaminae        | 97-SRNP-6144        | EPAF126-03            | AY666767                 |
| 3911              | Astraptes INGCUP | Eudaminae        | 02-SRNP-20352       | EPAF373-03            | AY666805                 |
| 3912              | Astraptes INGCUP | Eudaminae        | 02-SRNP-19284       | EPAF309-03            | AY667022                 |
| 3913              | Astraptes INGCUP | Eudaminae        | 07-SRNP-4462        | MHMXT027-08           | JF761562                 |
| 3914              | Astraptes INGCUP | Eudaminae        | 07-SRNP-4324        | MHMXT037-08           | JF761554                 |
| 3915              | Astraptes INGCUP | Eudaminae        | 07-SRNP-4806        | MHMXT040-08           | JF761552                 |
| 3916              | Astraptes INGCUP | Eudaminae        | 07-SRNP-2374        | MHAHL290-07           | JF761546                 |
| 3917              | Astraptes INGCUP | Eudaminae        | 07-SRNP-3068        | MHMXO852-08           | JF761579                 |
| 3918              | Astraptes INGCUP | Eudaminae        | 04-SRNP-40472       | MHAHH381-06           | GU155000                 |
| 3919              | Astraptes INGCUP | Eudaminae        | 06-SRNP-46319       | MHAHJ621-07           | JF752397                 |

| <b>Tree Order</b> | <b>Species</b>   | <b>Subfamily</b> | <b>ACG Sampleid</b> | <b>BOLD Processid</b> | <b>Genbank Accession</b> |
|-------------------|------------------|------------------|---------------------|-----------------------|--------------------------|
| 3920              | Astraptes INGCUP | Eudaminae        | 03-SRNP-5870        | MHAHH312-06           | GU154993                 |
| 3921              | Astraptes INGCUP | Eudaminae        | 04-SRNP-47856       | MHAHH248-06           | GU154989                 |
| 3922              | Astraptes INGCUP | Eudaminae        | 99-SRNP-13677       | EPAF202-03            | AY667010                 |
| 3923              | Astraptes INGCUP | Eudaminae        | 07-SRNP-31660       | MHAHL298-07           | JF761548                 |
| 3924              | Astraptes INGCUP | Eudaminae        | 06-SRNP-46276       | MHAHJ938-07           | JF752405                 |
| 3925              | Astraptes INGCUP | Eudaminae        | 04-SRNP-47345       | MHAHH394-06           | GU155002                 |
| 3926              | Astraptes INGCUP | Eudaminae        | 04-SRNP-2251        | MHAHH250-06           | GU154988                 |
| 3927              | Astraptes INGCUP | Eudaminae        | 05-SRNP-1361        | MHAHG443-06           | GU151124                 |
| 3928              | Astraptes INGCUP | Eudaminae        | 07-SRNP-58736       | MHM XO849-08          | JF761580                 |
| 3929              | Astraptes INGCUP | Eudaminae        | 04-SRNP-47196       | MHAHH253-06           | GU154990                 |
| 3930              | Astraptes INGCUP | Eudaminae        | 06-SRNP-55405       | MHAHG178-06           | GU151119                 |
| 3931              | Astraptes INGCUP | Eudaminae        | 07-SRNP-1054        | MHAHL272-07           | JF761541                 |
| 3932              | Astraptes INGCUP | Eudaminae        | 07-SRNP-1595        | MHAHL278-07           | JF761542                 |
| 3933              | Astraptes INGCUP | Eudaminae        | 04-SRNP-61428       | MHAHH276-06           | GU154991                 |
| 3934              | Astraptes INGCUP | Eudaminae        | 05-SRNP-19576       | MHAHG481-06           | GU151126                 |
| 3935              | Astraptes INGCUP | Eudaminae        | 05-SRNP-58121       | MHAHG440-06           | GU151121                 |
| 3936              | Astraptes INGCUP | Eudaminae        | 07-SRNP-4606        | MHMXT025-08           | JF761564                 |
| 3937              | Astraptes INGCUP | Eudaminae        | 97-SRNP-5640        | EPAF151-03            | AY666699                 |
| 3938              | Astraptes INGCUP | Eudaminae        | 07-SRNP-4488        | MHMXT022-08           | JF761567                 |
| 3939              | Astraptes INGCUP | Eudaminae        | 07-SRNP-4489        | MHMXT023-08           | JF761566                 |
| 3940              | Astraptes INGCUP | Eudaminae        | 07-SRNP-4608        | MHMXT026-08           | JF761563                 |
| 3941              | Astraptes INGCUP | Eudaminae        | 04-SRNP-47346       | MHAHH261-06           | GU154987                 |
| 3942              | Astraptes INGCUP | Eudaminae        | 08-SRNP-1418        | MHM XW159-09          | JF753672                 |
| 3943              | Astraptes INGCUP | Eudaminae        | 04-SRNP-40582       | MHAHH382-06           | GU154999                 |
| 3944              | Astraptes INGCUP | Eudaminae        | 07-SRNP-4277        | MHMXT041-08           | JF761551                 |
| 3945              | Astraptes INGCUP | Eudaminae        | 04-SRNP-35086       | CSRII426-04           | DQ291880                 |
| 3946              | Astraptes INGCUP | Eudaminae        | 07-SRNP-4833        | MHMXT032-08           | JF761557                 |
| 3947              | Astraptes INGCUP | Eudaminae        | 03-SRNP-15979       | MHAHH321-06           | GU154995                 |
| 3948              | Astraptes HIHAMP | Eudaminae        | 04-SRNP-35067       | CSRII172-04           | AY724412                 |
| 3949              | Astraptes HIHAMP | Eudaminae        | 04-SRNP-35081       | CSRII425-04           | AY724411                 |
| 3950              | Astraptes HIHAMP | Eudaminae        | 06-SRNP-36085       | MHAHK276-07           | JF760350                 |
| 3951              | Astraptes HIHAMP | Eudaminae        | 07-SRNP-35469       | MHM XK352-07          | JF761527                 |
| 3952              | Astraptes HIHAMP | Eudaminae        | 06-SRNP-36608       | MHAHK255-07           | JF760348                 |
| 3953              | Astraptes HIHAMP | Eudaminae        | 99-SRNP-1215        | EPAF199-03            | AY667056                 |
| 3954              | Astraptes HIHAMP | Eudaminae        | 04-SRNP-56052       | MHAHH283-06           | GU154963                 |
| 3955              | Astraptes HIHAMP | Eudaminae        | 03-SRNP-22543       | MHAHH302-06           | GU154964                 |
| 3956              | Astraptes HIHAMP | Eudaminae        | 07-SRNP-45714       | MHM XO860-08          | JF761523                 |
| 3957              | Astraptes HIHAMP | Eudaminae        | 05-SRNP-35903       | MHAHG431-06           | GU151115                 |
| 3958              | Astraptes HIHAMP | Eudaminae        | 07-SRNP-45437       | MHM XR734-08          | JF761521                 |
| 3959              | Astraptes HIHAMP | Eudaminae        | 07-SRNP-36293       | MHM XO836-08          | JF761524                 |
| 3960              | Astraptes HIHAMP | Eudaminae        | 07-SRNP-35467       | MHM XK355-07          | JF761525                 |
| 3961              | Astraptes HIHAMP | Eudaminae        | 07-SRNP-35468       | MHM XK354-07          | JF761526                 |
| 3962              | Astraptes HIHAMP | Eudaminae        | 06-SRNP-36705       | MHM XK349-07          | JF761528                 |
| 3963              | Astraptes HIHAMP | Eudaminae        | 06-SRNP-36706       | MHM XK331-07          | JF761529                 |
| 3964              | Astraptes HIHAMP | Eudaminae        | 06-SRNP-35831       | MHAHK281-07           | JF760351                 |
| 3965              | Astraptes HIHAMP | Eudaminae        | 06-SRNP-36787       | MHAHK260-07           | JF760349                 |
| 3966              | Astraptes HIHAMP | Eudaminae        | 06-SRNP-36083       | MHAHJ926-07           | JF752392                 |
| 3967              | Astraptes HIHAMP | Eudaminae        | 06-SRNP-35716       | MHAHI014-06           | GU155807                 |
| 3968              | Astraptes HIHAMP | Eudaminae        | 03-SRNP-3079        | MHAHH322-06           | GU154965                 |
| 3969              | Astraptes HIHAMP | Eudaminae        | 05-SRNP-35763       | MHAHG438-06           | GU151117                 |
| 3970              | Astraptes HIHAMP | Eudaminae        | 05-SRNP-35765       | MHAHG437-06           | GU151116                 |
| 3971              | Astraptes HIHAMP | Eudaminae        | 06-SRNP-35832       | MHAHJ935-07           | JF752393                 |
| 3972              | Astraptes HIHAMP | Eudaminae        | 97-SRNP-1804        | EPAF135-03            | AY666757                 |
| 3973              | Astraptes HIHAMP | Eudaminae        | 01-SRNP-7374        | EPAF244-03            | AY666655                 |
| 3974              | Astraptes HIHAMP | Eudaminae        | 02-SRNP-23035       | EPAF269-03            | AY666947                 |
| 3975              | Astraptes HIHAMP | Eudaminae        | 99-SRNP-1220        | EPAF200-03            | AY666999                 |

| Tree Order | Species                    | Subfamily | ACG Sampleid  | BOLD Processid | Genbank Accession |
|------------|----------------------------|-----------|---------------|----------------|-------------------|
| 3976       | Astraptus HIHAMP           | Eudaminae | 00-SRNP-22183 | EPAF226-03     | AY666868          |
| 3977       | Astraptus HIHAMP           | Eudaminae | 01-SRNP-6199  | EPAF229-03     | AY666938          |
| 3978       | Astraptus HIHAMP           | Eudaminae | 99-SRNP-1098  | EPAF196-03     | AY667013          |
| 3979       | Astraptus HIHAMP           | Eudaminae | 95-SRNP-666   | EPAF065-03     | AY666903          |
| 3980       | Astraptus HIHAMP           | Eudaminae | 00-SRNP-10424 | EPAF221-03     | AY666950          |
| 3981       | Astraptus HIHAMP           | Eudaminae | 97-SRNP-1588  | EPAF485-03     | AY666607          |
| 3982       | Astraptus HIHAMP           | Eudaminae | 97-SRNP-1613  | EPAF134-03     | AY666748          |
| 3983       | Astraptus INGCUP           | Eudaminae | 05-SRNP-34301 | MHAHI674-06    | GU155808          |
| 3984       | Astraptus HIHAMP           | Eudaminae | 01-SRNP-7327  | EPAF242-03     | AY666663          |
| 3985       | Astraptus HIHAMP           | Eudaminae | 97-SRNP-1641  | EPAF137-03     | AY666742          |
| 3986       | Astraptus HIHAMP           | Eudaminae | 07-SRNP-45715 | MHM XR722-08   | JF761522          |
| 3987       | Astraptus HIHAMP           | Eudaminae | 07-SRNP-36295 | MHMXT020-08    | JF761520          |
| 3988       | Astraptus HIHAMP           | Eudaminae | 08-SRNP-35798 | MHMXX474-09    | JF777625          |
| 3989       | Astraptus HIHAMP           | Eudaminae | 08-SRNP-6196  | MHMXY1114-09   | GU666429          |
| 3990       | Astraptus fulgurator group | Eudaminae | 09-SRNP-72096 | MHMYE1576-09   | HM391136          |
| 3991       | Astraptus INGCUP           | Eudaminae | 06-SRNP-23021 | MHAHJ807-07    | JF752402          |
| 3992       | Astraptus INGCUP           | Eudaminae | 07-SRNP-4664  | MHMXT029-08    | JF761560          |
| 3993       | Astraptus INGCUP           | Eudaminae | 07-SRNP-55016 | MHAHK254-07    | JF760355          |
| 3994       | Astraptus MYST             | Eudaminae | 90-SRNP-1632  | EPAF008-03     | AY666937          |
| 3995       | Astraptus MYST             | Eudaminae | 02-SRNP-33369 | EPAF344-03     | AY666975          |
| 3996       | Astraptus MYST             | Eudaminae | 02-SRNP-33451 | EPAF363-03     | AY667054          |
| 3997       | Astraptus MYST             | Eudaminae | 03-SRNP-21723 | MHAHH180-06    | GU155087          |
| 3998       | Astraptus MYST             | Eudaminae | 03-SRNP-20884 | MHAHH341-06    | GU155088          |
| 3999       | Astraptus MYST             | Eudaminae | 03-SRNP-31167 | MHAHH350-06    | GU155089          |
| 4000       | Astraptus MYST             | Eudaminae | 06-SRNP-41913 | MHAHI012-06    | GU155813          |
| 4001       | Astraptus YESENN           | Eudaminae | 07-SRNP-45998 | MHMXT012-08    | JF761655          |
| 4002       | Astraptus INGCUP           | Eudaminae | 03-SRNP-10415 | MHAHH318-06    | GU154994          |
| 4003       | Astraptus INGCUP           | Eudaminae | 06-SRNP-3381  | MHAHH487-06    | GU155004          |
| 4004       | Astraptus INGCUP           | Eudaminae | 07-SRNP-4663  | MHMXT028-08    | JF761561          |
| 4005       | Astraptus INGCUP           | Eudaminae | 02-SRNP-33256 | EPAF318-03     | AY667007          |
| 4006       | Astraptus INGCUP           | Eudaminae | 07-SRNP-1756  | MHAHL286-07    | JF761544          |
| 4007       | Astraptus INGCUP           | Eudaminae | 07-SRNP-4469  | MHMXT043-08    | JF761549          |
| 4008       | Astraptus INGCUP           | Eudaminae | 07-SRNP-33557 | MHMXT036-08    | JF761555          |
| 4009       | Astraptus FABOV            | Eudaminae | 94-SRNP-678   | EPAF052-03     | AY666886          |
| 4010       | Astraptus FABOV            | Eudaminae | 06-SRNP-47519 | MHAHK237-07    | JF760347          |
| 4011       | Astraptus FABOV            | Eudaminae | 98-SRNP-79    | EPAF171-03     | AY666627          |
| 4012       | Astraptus FABOV            | Eudaminae | 03-SRNP-38625 | MHAHH190-06    | GU154949          |
| 4013       | Astraptus FABOV            | Eudaminae | 05-SRNP-34585 | MHAHG176-06    | GU151105          |
| 4014       | Astraptus FABOV            | Eudaminae | 03-SRNP-38030 | MHAHH218-06    | GU154947          |
| 4015       | Astraptus FABOV            | Eudaminae | 04-SRNP-47477 | MHAHH225-06    | GU154951          |
| 4016       | Astraptus FABOV            | Eudaminae | 03-SRNP-18628 | MHAHH204-06    | GU154950          |
| 4017       | Astraptus FABOV            | Eudaminae | 03-SRNP-21672 | MHAHH217-06    | GU154948          |
| 4018       | Astraptus FABOV            | Eudaminae | 03-SRNP-1100  | MHAHH323-06    | GU154957          |
| 4019       | Astraptus FABOV            | Eudaminae | 04-SRNP-47263 | MHAHH364-06    | GU154959          |
| 4020       | Astraptus FABOV            | Eudaminae | 05-SRNP-20134 | MHAHH274-06    | GU154956          |
| 4021       | Astraptus FABOV            | Eudaminae | 04-SRNP-27294 | MHAHH278-06    | GU154953          |
| 4022       | Astraptus FABOV            | Eudaminae | 04-SRNP-47478 | MHAHH226-06    | GU154952          |
| 4023       | Astraptus FABOV            | Eudaminae | 04-SRNP-15696 | MHAHH267-06    | GU154954          |
| 4024       | Astraptus FABOV            | Eudaminae | 07-SRNP-40452 | MHM XK350-07   | JF761518          |
| 4025       | Astraptus FABOV            | Eudaminae | 05-SRNP-30622 | MHAHG396-06    | GU151108          |
| 4026       | Astraptus FABOV            | Eudaminae | 08-SRNP-45170 | MHM XW178-09   | JF753667          |
| 4027       | Astraptus FABOV            | Eudaminae | 08-SRNP-6000  | MHMXY1110-09   | GU666433          |
| 4028       | Astraptus FABOV            | Eudaminae | 07-SRNP-21410 | MHAHL301-07    | JF761515          |
| 4029       | Astraptus FABOV            | Eudaminae | 07-SRNP-58607 | MHM XR726-08   | JF761516          |
| 4030       | Astraptus FABOV            | Eudaminae | 07-SRNP-40453 | MHM XK338-07   | JF761519          |
| 4031       | Astraptus FABOV            | Eudaminae | 07-SRNP-22021 | MHAHL293-07    | JF761514          |



| <b>Tree Order</b> | <b>Species</b>    | <b>Subfamily</b> | <b>ACG Sampleid</b> | <b>BOLD Processid</b> | <b>Genbank Accession</b> |
|-------------------|-------------------|------------------|---------------------|-----------------------|--------------------------|
| 4032              | Astraptes FABOV   | Eudaminae        | 04-SRNP-22024       | MHAHH395-06           | GU154960                 |
| 4033              | Astraptes FABOV   | Eudaminae        | 05-SRNP-25512       | MHAHH482-06           | GU154962                 |
| 4034              | Astraptes FABOV   | Eudaminae        | 03-SRNP-15973       | MHAHH327-06           | GU154958                 |
| 4035              | Astraptes FABOV   | Eudaminae        | 03-SRNP-19356       | MHAHH159-06           | GU154961                 |
| 4036              | Astraptes FABOV   | Eudaminae        | 04-SRNP-50141       | MHAHG445-06           | GU151113                 |
| 4037              | Astraptes FABOV   | Eudaminae        | 04-SRNP-56195       | MHAHG422-06           | GU151112                 |
| 4038              | Astraptes FABOV   | Eudaminae        | 04-SRNP-26414       | MHAHG406-06           | GU151109                 |
| 4039              | Astraptes FABOV   | Eudaminae        | 94-SRNP-5469        | EPAF057-03            | AY666875                 |
| 4040              | Astraptes FABOV   | Eudaminae        | 80-SRNP-216         | EPAF001-03            | AY666939                 |
| 4041              | Astraptes FABOV   | Eudaminae        | 97-SRNP-5023        | EPAF139-03            | AY666746                 |
| 4042              | Astraptes FABOV   | Eudaminae        | 97-SRNP-5143        | EPAF138-03            | AY666740                 |
| 4043              | Astraptes FABOV   | Eudaminae        | 02-SRNP-13079       | EPAF282-03            | AY666831                 |
| 4044              | Astraptes FABOV   | Eudaminae        | 95-SRNP-6867        | EPAF404-03            | AY666745                 |
| 4045              | Astraptes FABOV   | Eudaminae        | 92-SRNP-6023        | EPAF026-03            | AY666922                 |
| 4046              | Astraptes FABOV   | Eudaminae        | 93-SRNP-6312        | EPAF046-03            | AY666904                 |
| 4047              | Astraptes FABOV   | Eudaminae        | 95-SRNP-6871        | EPAF080-03            | AY666866                 |
| 4048              | Astraptes FABOV   | Eudaminae        | 97-SRNP-5060        | EPAF141-03            | AY666731                 |
| 4049              | Astraptes FABOV   | Eudaminae        | 93-SRNP-7060        | EPAF048-03            | AY666898                 |
| 4050              | Astraptes FABOV   | Eudaminae        | 02-SRNP-31579       | EPAF327-03            | AY667002                 |
| 4051              | Astraptes FABOV   | Eudaminae        | 95-SRNP-9320        | EPAF480-03            | AY666624                 |
| 4052              | Astraptes FABOV   | Eudaminae        | 02-SRNP-31569       | EPAF326-03            | AY666987                 |
| 4053              | Astraptes FABOV   | Eudaminae        | 02-SRNP-13082       | EPAF286-03            | AY666867                 |
| 4054              | Astraptes FABOV   | Eudaminae        | 96-SRNP-171         | EPAF090-03            | AY666837                 |
| 4055              | Astraptes FABOV   | Eudaminae        | 95-SRNP-6103        | EPAF076-03            | AY666863                 |
| 4056              | Astraptes FABOV   | Eudaminae        | 95-SRNP-511         | EPAF064-03            | AY666895                 |
| 4057              | Astraptes FABOV   | Eudaminae        | 99-SRNP-8551        | EPAF193-03            | AY667014                 |
| 4058              | Astraptes FABOV   | Eudaminae        | 02-SRNP-28909       | EPAF292-03            | AY666823                 |
| 4059              | Astraptes FABOV   | Eudaminae        | 97-SRNP-5809        | EPAF154-03            | AY666737                 |
| 4060              | Astraptes FABOV   | Eudaminae        | 97-SRNP-5926        | EPAF153-03            | AY666722                 |
| 4061              | Astraptes FABOV   | Eudaminae        | 92-SRNP-4645        | EPAF023-03            | AY666921                 |
| 4062              | Astraptes FABOV   | Eudaminae        | 95-SRNP-6866        | EPAF079-03            | AY666852                 |
| 4063              | Astraptes FABOV   | Eudaminae        | 94-SRNP-745         | EPAF053-03            | AY666883                 |
| 4064              | Astraptes FABOV   | Eudaminae        | 04-SRNP-15697       | MHAHH271-06           | GU154955                 |
| 4065              | Astraptes FABOV   | Eudaminae        | 05-SRNP-45420       | MHAHG390-06           | GU151107                 |
| 4066              | Astraptes FABOV   | Eudaminae        | 80-SRNP-160         | EPAF384-03            | AY666775                 |
| 4067              | Astraptes FABOV   | Eudaminae        | 97-SRNP-5927        | EPAF156-03            | AY666813                 |
| 4068              | Astraptes FABOV   | Eudaminae        | 04-SRNP-27295       | MHAHG416-06           | GU151110                 |
| 4069              | Astraptes FABOV   | Eudaminae        | 07-SRNP-56300       | MHMXX353-07           | JF761517                 |
| 4070              | Astraptes FABOV   | Eudaminae        | 05-SRNP-20856       | MHAHG378-06           | GU151106                 |
| 4071              | Astraptes FABOV   | Eudaminae        | 95-SRNP-8306        | EPAF085-03            | AY666881                 |
| 4072              | Astraptes FABOV   | Eudaminae        | 97-SRNP-5969        | EPAF435-03            | AY666694                 |
| 4073              | Astraptes FABOV   | Eudaminae        | 05-SRNP-21651       | MHAHG420-06           | GU151111                 |
| 4074              | Astraptes FABOV   | Eudaminae        | 05-SRNP-60050       | MHAHG480-06           | GU151114                 |
| 4075              | Astraptes FABOV   | Eudaminae        | 08-SRNP-58528       | MHMYC537-09           | GU649805                 |
| 4076              | Astraptes enta    | Eudaminae        | 03-SRNP-11423       | MHAHH214-06           | GU154946                 |
| 4077              | Astraptes enta    | Eudaminae        | 07-SRNP-42567       | MHMXR731-08           | JF761513                 |
| 4078              | Astraptes enta    | Eudaminae        | 09-SRNP-75531       | MHMYG2383-10          | HM885807                 |
| 4079              | Astraptes BYTTNER | Eudaminae        | 95-SRNP-8045        | EPAF082-03            | AY666854                 |
| 4080              | Astraptes BYTTNER | Eudaminae        | 95-SRNP-8046        | EPAF083-03            | AY666853                 |
| 4081              | Astraptes BYTTNER | Eudaminae        | 95-SRNP-8044        | EPAF084-03            | AY666872                 |
| 4082              | Astraptes LOHAMP  | Eudaminae        | 99-SRNP-17057       | EPAF207-03            | AY666997                 |
| 4083              | Astraptes LOHAMP  | Eudaminae        | 06-SRNP-36233       | MHAHK242-07           | JF760365                 |
| 4084              | Astraptes LOHAMP  | Eudaminae        | 06-SRNP-36395       | MHAHK238-07           | JF760361                 |
| 4085              | Astraptes LOHAMP  | Eudaminae        | 06-SRNP-31669       | MHAHH486-06           | GU155081                 |
| 4086              | Astraptes LOHAMP  | Eudaminae        | 06-SRNP-36238       | MHAHK243-07           | JF760366                 |
| 4087              | Astraptes LOHAMP  | Eudaminae        | 03-SRNP-4251        | MHAHH304-06           | GU155046                 |

| <b>Tree Order</b> | <b>Species</b>    | <b>Subfamily</b> | <b>ACG Sampleid</b> | <b>BOLD Processid</b> | <b>Genbank Accession</b> |
|-------------------|-------------------|------------------|---------------------|-----------------------|--------------------------|
| 4088              | Astraptles LOHAMP | Eudaminae        | 06-SRNP-36296       | MHAHK240-07           | JF760363                 |
| 4089              | Astraptles LOHAMP | Eudaminae        | 07-SRNP-2042        | MHAHL281-07           | JF761592                 |
| 4090              | Astraptles LOHAMP | Eudaminae        | 04-SRNP-35879       | MHAHH282-06           | GU155036                 |
| 4091              | Astraptles LOHAMP | Eudaminae        | 06-SRNP-36344       | MHAHK239-07           | JF760362                 |
| 4092              | Astraptles LOHAMP | Eudaminae        | 06-SRNP-36346       | MHAHK241-07           | JF760364                 |
| 4093              | Astraptles LOHAMP | Eudaminae        | 06-SRNP-36338       | MHAHK268-07           | JF760376                 |
| 4094              | Astraptles LOHAMP | Eudaminae        | 06-SRNP-7043        | MHAHJ581-07           | JF752413                 |
| 4095              | Astraptles LOHAMP | Eudaminae        | 06-SRNP-7363        | MHAHJ578-07           | JF752411                 |
| 4096              | Astraptles LOHAMP | Eudaminae        | 06-SRNP-8179        | MHAHJ589-07           | JF752416                 |
| 4097              | Astraptles LOHAMP | Eudaminae        | 04-SRNP-35147       | MHAHH388-06           | GU155073                 |
| 4098              | Astraptles LOHAMP | Eudaminae        | 03-SRNP-3139        | MHAHH324-06           | GU155055                 |
| 4099              | Astraptles LOHAMP | Eudaminae        | 04-SRNP-61342       | MHAHH275-06           | GU155029                 |
| 4100              | Astraptles LOHAMP | Eudaminae        | 04-SRNP-56771       | MHAHH270-06           | GU155030                 |
| 4101              | Astraptles LOHAMP | Eudaminae        | 03-SRNP-15889       | MHAHH188-06           | GU155011                 |
| 4102              | Astraptles LOHAMP | Eudaminae        | 06-SRNP-36052       | MHMXX849-07           | JF760384                 |
| 4103              | Astraptles LOHAMP | Eudaminae        | 06-SRNP-6884        | MHAHJ580-07           | JF752412                 |
| 4104              | Astraptles LOHAMP | Eudaminae        | 08-SRNP-35977       | MHMXX478-09           | JF777634                 |
| 4105              | Astraptles LOHAMP | Eudaminae        | 08-SRNP-35969       | MHMXX476-09           | JF777633                 |
| 4106              | Astraptles LOHAMP | Eudaminae        | 08-SRNP-35978       | MHMXX475-09           | JF777632                 |
| 4107              | Astraptles LOHAMP | Eudaminae        | 08-SRNP-72414       | MHMXX472-09           | JF777631                 |
| 4108              | Astraptles LOHAMP | Eudaminae        | 08-SRNP-35033       | MHMXX181-09           | JF753694                 |
| 4109              | Astraptles LOHAMP | Eudaminae        | 08-SRNP-21411       | MHMXX171-09           | JF753692                 |
| 4110              | Astraptles LOHAMP | Eudaminae        | 08-SRNP-35306       | MHMXX170-09           | JF753691                 |
| 4111              | Astraptles LOHAMP | Eudaminae        | 07-SRNP-36287       | MHMXX719-08           | JF761600                 |
| 4112              | Astraptles LOHAMP | Eudaminae        | 07-SRNP-3020        | MHMXX0864-08          | JF761602                 |
| 4113              | Astraptles LOHAMP | Eudaminae        | 07-SRNP-42071       | MHMXX0847-08          | JF761604                 |
| 4114              | Astraptles LOHAMP | Eudaminae        | 07-SRNP-36173       | MHMXX0844-08          | JF761605                 |
| 4115              | Astraptles LOHAMP | Eudaminae        | 07-SRNP-35819       | MHMXX0843-08          | JF761606                 |
| 4116              | Astraptles LOHAMP | Eudaminae        | 07-SRNP-35848       | MHMXX0840-08          | JF761607                 |
| 4117              | Astraptles LOHAMP | Eudaminae        | 07-SRNP-42123       | MHMXX0839-08          | JF761608                 |
| 4118              | Astraptles LOHAMP | Eudaminae        | 07-SRNP-35826       | MHAHL296-07           | JF761597                 |
| 4119              | Astraptles LOHAMP | Eudaminae        | 07-SRNP-35754       | MHAHL295-07           | JF761596                 |
| 4120              | Astraptles LOHAMP | Eudaminae        | 07-SRNP-35755       | MHAHL291-07           | JF761595                 |
| 4121              | Astraptles LOHAMP | Eudaminae        | 07-SRNP-35709       | MHAHL289-07           | JF761594                 |
| 4122              | Astraptles LOHAMP | Eudaminae        | 07-SRNP-697         | MHAHL273-07           | JF761591                 |
| 4123              | Astraptles LOHAMP | Eudaminae        | 07-SRNP-1983        | MHAHL270-07           | JF761589                 |
| 4124              | Astraptles LOHAMP | Eudaminae        | 07-SRNP-35414       | MHMXX356-07           | JF761609                 |
| 4125              | Astraptles LOHAMP | Eudaminae        | 06-SRNP-65614       | MHMXX347-07           | JF761611                 |
| 4126              | Astraptles LOHAMP | Eudaminae        | 07-SRNP-35525       | MHMXX345-07           | JF761612                 |
| 4127              | Astraptles LOHAMP | Eudaminae        | 07-SRNP-1211        | MHMXX341-07           | JF761614                 |
| 4128              | Astraptles LOHAMP | Eudaminae        | 07-SRNP-1467        | MHMXX337-07           | JF761615                 |
| 4129              | Astraptles LOHAMP | Eudaminae        | 06-SRNP-36758       | MHMXX850-07           | JF760383                 |
| 4130              | Astraptles LOHAMP | Eudaminae        | 06-SRNP-36094       | MHMXX848-07           | JF760385                 |
| 4131              | Astraptles LOHAMP | Eudaminae        | 06-SRNP-36941       | MHAHK280-07           | JF760382                 |
| 4132              | Astraptles LOHAMP | Eudaminae        | 06-SRNP-36618       | MHAHK279-07           | JF760381                 |
| 4133              | Astraptles LOHAMP | Eudaminae        | 06-SRNP-36087       | MHAHK278-07           | JF760380                 |
| 4134              | Astraptles LOHAMP | Eudaminae        | 06-SRNP-36707       | MHAHK273-07           | JF760379                 |
| 4135              | Astraptles LOHAMP | Eudaminae        | 06-SRNP-47853       | MHAHK272-07           | JF760378                 |
| 4136              | Astraptles LOHAMP | Eudaminae        | 06-SRNP-36541       | MHAHK267-07           | JF760375                 |
| 4137              | Astraptles LOHAMP | Eudaminae        | 06-SRNP-36616       | MHAHK266-07           | JF760374                 |
| 4138              | Astraptles LOHAMP | Eudaminae        | 06-SRNP-36544       | MHAHK262-07           | JF760370                 |
| 4139              | Astraptles LOHAMP | Eudaminae        | 06-SRNP-36237       | MHAHK261-07           | JF760369                 |
| 4140              | Astraptles LOHAMP | Eudaminae        | 07-SRNP-35045       | MHAHK236-07           | JF760360                 |
| 4141              | Astraptles LOHAMP | Eudaminae        | 07-SRNP-35040       | MHAHK235-07           | JF760359                 |
| 4142              | Astraptles LOHAMP | Eudaminae        | 06-SRNP-35627       | MHAHJ934-07           | JF752433                 |
| 4143              | Astraptles LOHAMP | Eudaminae        | 06-SRNP-35607       | MHAHJ931-07           | JF752431                 |

| <b>Tree Order</b> | <b>Species</b>    | <b>Subfamily</b> | <b>ACG Sampleid</b> | <b>BOLD Processid</b> | <b>Genbank<br/>Accession</b> |
|-------------------|-------------------|------------------|---------------------|-----------------------|------------------------------|
| 4144              | Astraptles LOHAMP | Eudaminae        | 06-SRNP-35688       | MHAHJ930-07           | JF752430                     |
| 4145              | Astraptles LOHAMP | Eudaminae        | 06-SRNP-35628       | MHAHJ929-07           | JF752429                     |
| 4146              | Astraptles LOHAMP | Eudaminae        | 06-SRNP-35619       | MHAHJ928-07           | JF752428                     |
| 4147              | Astraptles LOHAMP | Eudaminae        | 06-SRNP-35710       | MHAHJ924-07           | JF752427                     |
| 4148              | Astraptles LOHAMP | Eudaminae        | 06-SRNP-9530        | MHAHJ813-07           | JF752426                     |
| 4149              | Astraptles LOHAMP | Eudaminae        | 06-SRNP-6234        | MHAHJ810-07           | JF752425                     |
| 4150              | Astraptles LOHAMP | Eudaminae        | 06-SRNP-21646       | MHAHJ809-07           | JF752424                     |
| 4151              | Astraptles LOHAMP | Eudaminae        | 06-SRNP-9420        | MHAHJ806-07           | JF752423                     |
| 4152              | Astraptles LOHAMP | Eudaminae        | 06-SRNP-23242       | MHAHJ798-07           | JF752422                     |
| 4153              | Astraptles LOHAMP | Eudaminae        | 06-SRNP-6037        | MHAHJ732-07           | JF752420                     |
| 4154              | Astraptles LOHAMP | Eudaminae        | 06-SRNP-6038        | MHAHJ730-07           | JF752419                     |
| 4155              | Astraptles LOHAMP | Eudaminae        | 06-SRNP-47681       | MHAHJ671-07           | JF752418                     |
| 4156              | Astraptles LOHAMP | Eudaminae        | 06-SRNP-7042        | MHAHJ664-07           | JF752417                     |
| 4157              | Astraptles LOHAMP | Eudaminae        | 06-SRNP-5587        | MHAHJ588-07           | JF752415                     |
| 4158              | Astraptles LOHAMP | Eudaminae        | 06-SRNP-6933        | MHAHJ582-07           | JF752414                     |
| 4159              | Astraptles LOHAMP | Eudaminae        | 06-SRNP-8178        | MHAHJ577-07           | JF752410                     |
| 4160              | Astraptles LOHAMP | Eudaminae        | 06-SRNP-9171        | MHAHJ575-07           | JF752409                     |
| 4161              | Astraptles LOHAMP | Eudaminae        | 06-SRNP-8076        | MHAHJ573-07           | JF752408                     |
| 4162              | Astraptles LOHAMP | Eudaminae        | 06-SRNP-35562       | MHAHI015-06           | GU155809                     |
| 4163              | Astraptles LOHAMP | Eudaminae        | 06-SRNP-4848        | MHAHI010-06           | GU155810                     |
| 4164              | Astraptles LOHAMP | Eudaminae        | 04-SRNP-35126       | MHAHH392-06           | GU155075                     |
| 4165              | Astraptles LOHAMP | Eudaminae        | 04-SRNP-35127       | MHAHH389-06           | GU155071                     |
| 4166              | Astraptles LOHAMP | Eudaminae        | 04-SRNP-35162       | MHAHH386-06           | GU155070                     |
| 4167              | Astraptles LOHAMP | Eudaminae        | 04-SRNP-35149       | MHAHH385-06           | GU155005                     |
| 4168              | Astraptles LOHAMP | Eudaminae        | 04-SRNP-46671       | MHAHH373-06           | GU155067                     |
| 4169              | Astraptles LOHAMP | Eudaminae        | 04-SRNP-50042       | MHAHH370-06           | GU155039                     |
| 4170              | Astraptles LOHAMP | Eudaminae        | 04-SRNP-49891       | MHAHH369-06           | GU155063                     |
| 4171              | Astraptles LOHAMP | Eudaminae        | 04-SRNP-60810       | MHAHH365-06           | GU155066                     |
| 4172              | Astraptles LOHAMP | Eudaminae        | 04-SRNP-55659       | MHAHH362-06           | GU155065                     |
| 4173              | Astraptles LOHAMP | Eudaminae        | 04-SRNP-56335       | MHAHH361-06           | GU155064                     |
| 4174              | Astraptles LOHAMP | Eudaminae        | 04-SRNP-61002       | MHAHH360-06           | GU155041                     |
| 4175              | Astraptles LOHAMP | Eudaminae        | 04-SRNP-60550       | MHAHH359-06           | GU155059                     |
| 4176              | Astraptles LOHAMP | Eudaminae        | 04-SRNP-61012       | MHAHH358-06           | GU155061                     |
| 4177              | Astraptles LOHAMP | Eudaminae        | 04-SRNP-60933       | MHAHH357-06           | GU155058                     |
| 4178              | Astraptles LOHAMP | Eudaminae        | 04-SRNP-36186       | MHAHH356-06           | GU155062                     |
| 4179              | Astraptles LOHAMP | Eudaminae        | 04-SRNP-36170       | MHAHH355-06           | GU155060                     |
| 4180              | Astraptles LOHAMP | Eudaminae        | 03-SRNP-22299       | MHAHH354-06           | GU155052                     |
| 4181              | Astraptles LOHAMP | Eudaminae        | 03-SRNP-3138        | MHAHH326-06           | GU155056                     |
| 4182              | Astraptles LOHAMP | Eudaminae        | 03-SRNP-3509        | MHAHH319-06           | GU155053                     |
| 4183              | Astraptles LOHAMP | Eudaminae        | 03-SRNP-3100        | MHAHH317-06           | GU155042                     |
| 4184              | Astraptles LOHAMP | Eudaminae        | 03-SRNP-4933        | MHAHH316-06           | GU155044                     |
| 4185              | Astraptles LOHAMP | Eudaminae        | 03-SRNP-4776        | MHAHH315-06           | GU155047                     |
| 4186              | Astraptles LOHAMP | Eudaminae        | 03-SRNP-4281        | MHAHH307-06           | GU155048                     |
| 4187              | Astraptles LOHAMP | Eudaminae        | 03-SRNP-4252        | MHAHH306-06           | GU155049                     |
| 4188              | Astraptles LOHAMP | Eudaminae        | 03-SRNP-4410        | MHAHH305-06           | GU155045                     |
| 4189              | Astraptles LOHAMP | Eudaminae        | 03-SRNP-6959        | MHAHH299-06           | GU155040                     |
| 4190              | Astraptles LOHAMP | Eudaminae        | 03-SRNP-7550        | MHAHH298-06           | GU155043                     |
| 4191              | Astraptles LOHAMP | Eudaminae        | 04-SRNP-40265       | MHAHH182-06           | GU155007                     |
| 4192              | Astraptles LOHAMP | Eudaminae        | 03-SRNP-4699        | MHAHH173-06           | GU155008                     |
| 4193              | Astraptles LOHAMP | Eudaminae        | 03-SRNP-3193        | MHAHH166-06           | GU155006                     |
| 4194              | Astraptles LOHAMP | Eudaminae        | 03-SRNP-3258        | MHAHH165-06           | GU155072                     |
| 4195              | Astraptles LOHAMP | Eudaminae        | 03-SRNP-5544        | MHAHH164-06           | GU155076                     |
| 4196              | Astraptles LOHAMP | Eudaminae        | 03-SRNP-7135        | MHAHH163-06           | GU155078                     |
| 4197              | Astraptles LOHAMP | Eudaminae        | 03-SRNP-3112        | MHAHH162-06           | GU155077                     |
| 4198              | Astraptles LOHAMP | Eudaminae        | 03-SRNP-3343        | MHAHH161-06           | GU155079                     |
| 4199              | Astraptles LOHAMP | Eudaminae        | 03-SRNP-10879       | MHAHH160-06           | GU155080                     |

| <b>Tree Order</b> | <b>Species</b>    | <b>Subfamily</b> | <b>ACG Sampleid</b> | <b>BOLD Processid</b> | <b>Genbank Accession</b> |
|-------------------|-------------------|------------------|---------------------|-----------------------|--------------------------|
| 4200              | Astraptles LOHAMP | Eudaminae        | 03-SRNP-6958        | MHAHH156-06           | GU155069                 |
| 4201              | Astraptles LOHAMP | Eudaminae        | 06-SRNP-35048       | MHAHG454-06           | GU151144                 |
| 4202              | Astraptles LOHAMP | Eudaminae        | 06-SRNP-35127       | MHAHG449-06           | GU151143                 |
| 4203              | Astraptles LOHAMP | Eudaminae        | 04-SRNP-36231       | MHAHG426-06           | GU151141                 |
| 4204              | Astraptles LOHAMP | Eudaminae        | 05-SRNP-41118       | MHAHG414-06           | GU151140                 |
| 4205              | Astraptles LOHAMP | Eudaminae        | 04-SRNP-35980       | MHAHG403-06           | GU151138                 |
| 4206              | Astraptles LOHAMP | Eudaminae        | 05-SRNP-350         | MHAHG397-06           | GU151135                 |
| 4207              | Astraptles LOHAMP | Eudaminae        | 05-SRNP-35593       | MHAHG392-06           | GU151128                 |
| 4208              | Astraptles LOHAMP | Eudaminae        | 04-SRNP-56334       | MHAHG382-06           | GU151130                 |
| 4209              | Astraptles LOHAMP | Eudaminae        | 05-SRNP-231         | MHAHG379-06           | GU151131                 |
| 4210              | Astraptles LOHAMP | Eudaminae        | 07-SRNP-35931       | MHAHL300-07           | JF761598                 |
| 4211              | Astraptles LOHAMP | Eudaminae        | 07-SRNP-40830       | MHAHL285-07           | JF761593                 |
| 4212              | Astraptles LOHAMP | Eudaminae        | 06-SRNP-36607       | MHAHK263-07           | JF760371                 |
| 4213              | Astraptles LOHAMP | Eudaminae        | 07-SRNP-35002       | MHAHK259-07           | JF760368                 |
| 4214              | Astraptles LOHAMP | Eudaminae        | 06-SRNP-42492       | MHAHI564-06           | GU155811                 |
| 4215              | Astraptles LOHAMP | Eudaminae        | 06-SRNP-42491       | MHAHI563-06           | GU155812                 |
| 4216              | Astraptles LOHAMP | Eudaminae        | 04-SRNP-35218       | MHAHH393-06           | GU155074                 |
| 4217              | Astraptles LOHAMP | Eudaminae        | 04-SRNP-35559       | MHAHH374-06           | GU155068                 |
| 4218              | Astraptles LOHAMP | Eudaminae        | 03-SRNP-23253       | MHAHH338-06           | GU155057                 |
| 4219              | Astraptles LOHAMP | Eudaminae        | 03-SRNP-3354        | MHAHH320-06           | GU155054                 |
| 4220              | Astraptles LOHAMP | Eudaminae        | 03-SRNP-4998        | MHAHH313-06           | GU155050                 |
| 4221              | Astraptles LOHAMP | Eudaminae        | 03-SRNP-4369        | MHAHH311-06           | GU155051                 |
| 4222              | Astraptles LOHAMP | Eudaminae        | 03-SRNP-1331        | MHAHH290-06           | GU155038                 |
| 4223              | Astraptles LOHAMP | Eudaminae        | 04-SRNP-35877       | MHAHH284-06           | GU155033                 |
| 4224              | Astraptles LOHAMP | Eudaminae        | 04-SRNP-35875       | MHAHH281-06           | GU155037                 |
| 4225              | Astraptles LOHAMP | Eudaminae        | 04-SRNP-35694       | MHAHH280-06           | GU155034                 |
| 4226              | Astraptles LOHAMP | Eudaminae        | 04-SRNP-3509        | MHAHH273-06           | GU155031                 |
| 4227              | Astraptles LOHAMP | Eudaminae        | 04-SRNP-35873       | MHAHH272-06           | GU155032                 |
| 4228              | Astraptles LOHAMP | Eudaminae        | 04-SRNP-3852        | MHAHH268-06           | GU155028                 |
| 4229              | Astraptles LOHAMP | Eudaminae        | 04-SRNP-35321       | MHAHH265-06           | GU155026                 |
| 4230              | Astraptles LOHAMP | Eudaminae        | 04-SRNP-35170       | MHAHH264-06           | GU155027                 |
| 4231              | Astraptles LOHAMP | Eudaminae        | 04-SRNP-46672       | MHAHH262-06           | GU155017                 |
| 4232              | Astraptles LOHAMP | Eudaminae        | 04-SRNP-35683       | MHAHH260-06           | GU155024                 |
| 4233              | Astraptles LOHAMP | Eudaminae        | 04-SRNP-35449       | MHAHH254-06           | GU155025                 |
| 4234              | Astraptles LOHAMP | Eudaminae        | 04-SRNP-35500       | MHAHH251-06           | GU155022                 |
| 4235              | Astraptles LOHAMP | Eudaminae        | 04-SRNP-35346       | MHAHH249-06           | GU155023                 |
| 4236              | Astraptles LOHAMP | Eudaminae        | 04-SRNP-35269       | MHAHH244-06           | GU155018                 |
| 4237              | Astraptles LOHAMP | Eudaminae        | 04-SRNP-35395       | MHAHH242-06           | GU155019                 |
| 4238              | Astraptles LOHAMP | Eudaminae        | 04-SRNP-35343       | MHAHH240-06           | GU155020                 |
| 4239              | Astraptles LOHAMP | Eudaminae        | 04-SRNP-35436       | MHAHH237-06           | GU155021                 |
| 4240              | Astraptles LOHAMP | Eudaminae        | 03-SRNP-23619       | MHAHH216-06           | GU155009                 |
| 4241              | Astraptles LOHAMP | Eudaminae        | 03-SRNP-4294        | MHAHH215-06           | GU155013                 |
| 4242              | Astraptles LOHAMP | Eudaminae        | 03-SRNP-6225        | MHAHH212-06           | GU155016                 |
| 4243              | Astraptles LOHAMP | Eudaminae        | 03-SRNP-13031.1     | MHAHH201-06           | GU155015                 |
| 4244              | Astraptles LOHAMP | Eudaminae        | 03-SRNP-31151       | MHAHH200-06           | GU155014                 |
| 4245              | Astraptles LOHAMP | Eudaminae        | 03-SRNP-23573       | MHAHH195-06           | GU155010                 |
| 4246              | Astraptles LOHAMP | Eudaminae        | 03-SRNP-22087       | MHAHH191-06           | GU155012                 |
| 4247              | Astraptles LOHAMP | Eudaminae        | 06-SRNP-35022       | MHAHG456-06           | GU151145                 |
| 4248              | Astraptles LOHAMP | Eudaminae        | 04-SRNP-36163       | MHAHG435-06           | GU151142                 |
| 4249              | Astraptles LOHAMP | Eudaminae        | 05-SRNP-1602        | MHAHG410-06           | GU151139                 |
| 4250              | Astraptles LOHAMP | Eudaminae        | 04-SRNP-36230       | MHAHG400-06           | GU151137                 |
| 4251              | Astraptles LOHAMP | Eudaminae        | 05-SRNP-35006       | MHAHG387-06           | GU151134                 |
| 4252              | Astraptles LOHAMP | Eudaminae        | 04-SRNP-36185       | MHAHG386-06           | GU151133                 |
| 4253              | Astraptles LOHAMP | Eudaminae        | 07-SRNP-35003       | MHAHK234-07           | JF760358                 |
| 4254              | Astraptles LOHAMP | Eudaminae        | 06-SRNP-7285        | MHAHJ733-07           | JF752421                 |
| 4255              | Astraptles LOHAMP | Eudaminae        | 07-SRNP-35593       | MHMXK351-07           | JF761610                 |

| <b>Tree Order</b> | <b>Species</b>    | <b>Subfamily</b> | <b>ACG Sampleid</b> | <b>BOLD Processid</b> | <b>Genbank Accession</b> |
|-------------------|-------------------|------------------|---------------------|-----------------------|--------------------------|
| 4256              | Astraptles LOHAMP | Eudaminae        | 06-SRNP-36339       | MHAHK265-07           | JF760373                 |
| 4257              | Astraptles LOHAMP | Eudaminae        | 07-SRNP-1982        | MHAHL271-07           | JF761590                 |
| 4258              | Astraptles LOHAMP | Eudaminae        | 04-SRNP-4381        | MHAHH279-06           | GU155035                 |
| 4259              | Astraptles LOHAMP | Eudaminae        | 00-SRNP-9957        | EPAF217-03            | AY666996                 |
| 4260              | Astraptles LOHAMP | Eudaminae        | 01-SRNP-7375        | EPAF243-03            | AY666671                 |
| 4261              | Astraptles LOHAMP | Eudaminae        | 02-SRNP-23196       | EPAF273-03            | AY666836                 |
| 4262              | Astraptles LOHAMP | Eudaminae        | 02-SRNP-8010        | EPAF378-03            | AY666783                 |
| 4263              | Astraptles LOHAMP | Eudaminae        | 01-SRNP-21272       | EPAF245-03            | AY666648                 |
| 4264              | Astraptles LOHAMP | Eudaminae        | 02-SRNP-19946       | EPAF325-03            | AY666998                 |
| 4265              | Astraptles LOHAMP | Eudaminae        | 02-SRNP-9906        | EPAF275-03            | AY666857                 |
| 4266              | Astraptles LOHAMP | Eudaminae        | 02-SRNP-19945       | EPAF346-03            | AY666955                 |
| 4267              | Astraptles LOHAMP | Eudaminae        | 02-SRNP-9775        | EPAF266-03            | AY666638                 |
| 4268              | Astraptles LOHAMP | Eudaminae        | 02-SRNP-7893        | EPAF281-03            | AY666819                 |
| 4269              | Astraptles LOHAMP | Eudaminae        | 02-SRNP-9769        | EPAF268-03            | AY666815                 |
| 4270              | Astraptles LOHAMP | Eudaminae        | 02-SRNP-19727       | EPAF474-03            | AY666623                 |
| 4271              | Astraptles LOHAMP | Eudaminae        | 02-SRNP-7856        | EPAF272-03            | AY666838                 |
| 4272              | Astraptles LOHAMP | Eudaminae        | 02-SRNP-23086       | EPAF271-03            | AY666849                 |
| 4273              | Astraptles LOHAMP | Eudaminae        | 02-SRNP-23926       | EPAF475-03            | AY666621                 |
| 4274              | Astraptles LOHAMP | Eudaminae        | 02-SRNP-19182       | EPAF295-03            | AY667048                 |
| 4275              | Astraptles LOHAMP | Eudaminae        | 01-SRNP-6254        | EPAF232-03            | AY666758                 |
| 4276              | Astraptles LOHAMP | Eudaminae        | 98-SRNP-2129        | EPAF161-03            | AY666675                 |
| 4277              | Astraptles LOHAMP | Eudaminae        | 97-SRNP-804         | EPAF111-03            | AY666801                 |
| 4278              | Astraptles LOHAMP | Eudaminae        | 98-SRNP-2071        | EPAF160-03            | AY666679                 |
| 4279              | Astraptles LOHAMP | Eudaminae        | 01-SRNP-21069       | EPAF246-03            | AY666646                 |
| 4280              | Astraptles LOHAMP | Eudaminae        | 98-SRNP-2132        | EPAF159-03            | AY666688                 |
| 4281              | Astraptles LOHAMP | Eudaminae        | 98-SRNP-6256        | EPAF476-03            | AY666633                 |
| 4282              | Astraptles LOHAMP | Eudaminae        | 98-SRNP-6331        | EPAF162-03            | AY666706                 |
| 4283              | Astraptles LOHAMP | Eudaminae        | 98-SRNP-2607        | EPAF169-03            | AY666672                 |
| 4284              | Astraptles LOHAMP | Eudaminae        | 94-SRNP-10101       | EPAF062-03            | AY666877                 |
| 4285              | Astraptles LOHAMP | Eudaminae        | 99-SRNP-17142       | EPAF206-03            | AY666989                 |
| 4286              | Astraptles LOHAMP | Eudaminae        | 99-SRNP-17117       | EPAF208-03            | AY666963                 |
| 4287              | Astraptles LOHAMP | Eudaminae        | 97-SRNP-795         | EPAF110-03            | AY666808                 |
| 4288              | Astraptles LOHAMP | Eudaminae        | 99-SRNP-17030       | EPAF204-03            | AY666982                 |
| 4289              | Astraptles LOHAMP | Eudaminae        | 99-SRNP-17039       | EPAF205-03            | AY666980                 |
| 4290              | Astraptles LOHAMP | Eudaminae        | 00-SRNP-11876       | EPAF219-03            | AY666942                 |
| 4291              | Astraptles LOHAMP | Eudaminae        | 99-SRNP-1893        | EPAF203-03            | AY666990                 |
| 4292              | Astraptles LOHAMP | Eudaminae        | 00-SRNP-11725       | EPAF216-03            | AY666974                 |
| 4293              | Astraptles LOHAMP | Eudaminae        | 99-SRNP-17192       | EPAF210-03            | AY666986                 |
| 4294              | Astraptles LOHAMP | Eudaminae        | 96-SRNP-7037        | EPAF097-03            | AY666833                 |
| 4295              | Astraptles LOHAMP | Eudaminae        | 95-SRNP-244         | EPAF063-03            | AY666888                 |
| 4296              | Astraptles LOHAMP | Eudaminae        | 02-SRNP-9525        | EPAF262-03            | AY666601                 |
| 4297              | Astraptles LOHAMP | Eudaminae        | 05-SRNP-2170        | MHAHG383-06           | GU151132                 |
| 4298              | Astraptles LOHAMP | Eudaminae        | 07-SRNP-45889       | MHMXT035-08           | JF761599                 |
| 4299              | Astraptles LOHAMP | Eudaminae        | 99-SRNP-1403        | EPAF201-03            | AY667000                 |
| 4300              | Astraptles LOHAMP | Eudaminae        | 97-SRNP-1898        | EPAF148-03            | AY666723                 |
| 4301              | Astraptles LOHAMP | Eudaminae        | 97-SRNP-6178        | EPAF131-03            | AY666759                 |
| 4302              | Astraptles LOHAMP | Eudaminae        | 97-SRNP-6757        | EPAF145-03            | AY666738                 |
| 4303              | Astraptles LOHAMP | Eudaminae        | 95-SRNP-365         | EPAF114-03            | AY666807                 |
| 4304              | Astraptles LOHAMP | Eudaminae        | 95-SRNP-867         | EPAF066-03            | AY666871                 |
| 4305              | Astraptles LOHAMP | Eudaminae        | 06-SRNP-36701       | MHAHK264-07           | JF760372                 |
| 4306              | Astraptles LOHAMP | Eudaminae        | 06-SRNP-36231       | MHAHK258-07           | JF760367                 |
| 4307              | Astraptles LOHAMP | Eudaminae        | 04-SRNP-36169       | MHAHG385-06           | GU151129                 |
| 4308              | Astraptles LOHAMP | Eudaminae        | 05-SRNP-40961       | MHAHG402-06           | GU151136                 |
| 4309              | Astraptles LOHAMP | Eudaminae        | 06-SRNP-7520        | MHAHJ572-07           | JF752407                 |
| 4310              | Astraptles LOHAMP | Eudaminae        | 06-SRNP-35608       | MHAHJ933-07           | JF752432                 |
| 4311              | Astraptles LOHAMP | Eudaminae        | 06-SRNP-36679       | MHAHK271-07           | JF760377                 |

| <b>Tree Order</b> | <b>Species</b>    | <b>Subfamily</b> | <b>ACG Sampleid</b> | <b>BOLD Processid</b> | <b>Genbank<br/>Accession</b> |
|-------------------|-------------------|------------------|---------------------|-----------------------|------------------------------|
| 4312              | Astraptles LOHAMP | Eudaminae        | 07-SRNP-30949       | MHMXXK343-07          | JF761613                     |
| 4313              | Astraptles LOHAMP | Eudaminae        | 07-SRNP-2787        | MHMXXO851-08          | JF761603                     |
| 4314              | Astraptles LOHAMP | Eudaminae        | 07-SRNP-2858        | MHMXXO867-08          | JF761601                     |
| 4315              | Astraptles LOHAMP | Eudaminae        | 08-SRNP-71001       | MHMXXW173-09          | JF753693                     |
| 4316              | Astraptles LOHAMP | Eudaminae        | 08-SRNP-35886       | MHMXX479-09           | JF777635                     |
| 4317              | Astraptles LOHAMP | Eudaminae        | 08-SRNP-5784        | MHMXY1111-09          | GU666434                     |
| 4318              | Astraptles LOHAMP | Eudaminae        | 09-SRNP-69238       | MHMYE1402-09          | HM424351                     |
| 4319              | Astraptles LOHAMP | Eudaminae        | 09-SRNP-72074       | MHMYE1403-09          | HM424352                     |
| 4320              | Astraptles LOHAMP | Eudaminae        | 09-SRNP-35515       | MHMYE1577-09          | HM391137                     |
| 4321              | Astraptles LOHAMP | Eudaminae        | 09-SRNP-41801       | MHMYH117-10           | HM887269                     |
| 4322              | Astraptles YESENN | Eudaminae        | 98-SRNP-2713        | EPAF450-03            |                              |
| 4323              | Astraptles YESENN | Eudaminae        | 03-SRNP-9129        | MHAHH347-06           | GU155191                     |
| 4324              | Astraptles YESENN | Eudaminae        | 05-SRNP-1745        | MHAHG411-06           | GU151186                     |
| 4325              | Astraptles YESENN | Eudaminae        | 03-SRNP-22479       | MHAHH332-06           | GU155182                     |
| 4326              | Astraptles YESENN | Eudaminae        | 06-SRNP-31612       | MHAHH481-06           | GU155198                     |
| 4327              | Astraptles YESENN | Eudaminae        | 07-SRNP-1716        | MHAHL274-07           | JF761646                     |
| 4328              | Astraptles YESENN | Eudaminae        | 07-SRNP-1714        | MHAHL299-07           | JF761651                     |
| 4329              | Astraptles YESENN | Eudaminae        | 08-SRNP-1634        | MHMXXW180-09          | JF753700                     |
| 4330              | Astraptles YESENN | Eudaminae        | 08-SRNP-1633        | MHMXXW183-09          | JF753701                     |
| 4331              | Astraptles YESENN | Eudaminae        | 95-SRNP-512         | EPAF442-03            | AY666667                     |
| 4332              | Astraptles YESENN | Eudaminae        | 02-SRNP-9495        | EPAF441-03            | AY666678                     |
| 4333              | Astraptles YESENN | Eudaminae        | 95-SRNP-840         | EPAF488-03            | AY667059                     |
| 4334              | Astraptles YESENN | Eudaminae        | 07-SRNP-23723       | MHMXT015-08           | JF761654                     |
| 4335              | Astraptles YESENN | Eudaminae        | 05-SRNP-2389        | MHAHG433-06           | GU151188                     |
| 4336              | Astraptles YESENN | Eudaminae        | 98-SRNP-14616       | EPAF406-03            | AY666734                     |
| 4337              | Astraptles YESENN | Eudaminae        | 02-SRNP-21442       | EPAF368-03            | AY666798                     |
| 4338              | Astraptles YESENN | Eudaminae        | 03-SRNP-5145        | MHAHH325-06           | GU155174                     |
| 4339              | Astraptles YESENN | Eudaminae        | 06-SRNP-34242       | MHAHI512-06           | GU155815                     |
| 4340              | Astraptles YESENN | Eudaminae        | 04-SRNP-48269       | MHMXY1116-09          | GU666423                     |
| 4341              | Astraptles YESENN | Eudaminae        | 03-SRNP-3194        | MHAHH167-06           | GU155118                     |
| 4342              | Astraptles YESENN | Eudaminae        | 02-SRNP-9939        | EPAF264-03            | AY666606                     |
| 4343              | Astraptles YESENN | Eudaminae        | 98-SRNP-7982        | EPAF410-03            | AY666752                     |
| 4344              | Astraptles YESENN | Eudaminae        | 06-SRNP-45979       | MHAHI002-06           | GU155825                     |
| 4345              | Astraptles YESENN | Eudaminae        | 95-SRNP-4551        | EPAF070-03            | AY666859                     |
| 4346              | Astraptles YESENN | Eudaminae        | 99-SRNP-302         | EPAF179-03            | AY666608                     |
| 4347              | Astraptles YESENN | Eudaminae        | 04-SRNP-46518       | MHAHH230-06           | GU155151                     |
| 4348              | Astraptles YESENN | Eudaminae        | 04-SRNP-46751       | MHAHH258-06           | GU155157                     |
| 4349              | Astraptles YESENN | Eudaminae        | 95-SRNP-858         | EPAF443-03            | AY666681                     |
| 4350              | Astraptles YESENN | Eudaminae        | 03-SRNP-15877       | MHAHH329-06           | GU155175                     |
| 4351              | Astraptles YESENN | Eudaminae        | 08-SRNP-36525       | MHMXY1112-09          | GU666427                     |
| 4352              | Astraptles YESENN | Eudaminae        | 08-SRNP-36993       | MHMXY1117-09          | GU666424                     |
| 4353              | Astraptles YESENN | Eudaminae        | 08-SRNP-2398        | MHMXXW177-09          | JF753699                     |
| 4354              | Astraptles YESENN | Eudaminae        | 08-SRNP-2397        | MHMXX480-09           | JF777638                     |
| 4355              | Astraptles YESENN | Eudaminae        | 07-SRNP-23843       | MHMXXR724-08          | JF761657                     |
| 4356              | Astraptles YESENN | Eudaminae        | 08-SRNP-65542       | MHMXXW169-09          | JF753697                     |
| 4357              | Astraptles YESENN | Eudaminae        | 07-SRNP-45395       | MHMXXO862-08          | JF761662                     |
| 4358              | Astraptles YESENN | Eudaminae        | 07-SRNP-65880       | MHMXXR721-08          | JF761658                     |
| 4359              | Astraptles YESENN | Eudaminae        | 07-SRNP-45394       | MHMXXO841-08          | JF761664                     |
| 4360              | Astraptles YESENN | Eudaminae        | 07-SRNP-45298       | MHMXXO842-08          | JF761663                     |
| 4361              | Astraptles YESENN | Eudaminae        | 07-SRNP-21700       | MHAHL275-07           | JF761647                     |
| 4362              | Astraptles YESENN | Eudaminae        | 07-SRNP-36004       | MHAHL302-07           | JF761652                     |
| 4363              | Astraptles YESENN | Eudaminae        | 06-SRNP-65728       | MHAHJ815-07           | JF752461                     |
| 4364              | Astraptles YESENN | Eudaminae        | 07-SRNP-1339        | MHMXXK339-07          | JF761665                     |
| 4365              | Astraptles INGUP  | Eudaminae        | 06-SRNP-7673        | MHAHJ587-07           | JF752396                     |
| 4366              | Astraptles YESENN | Eudaminae        | 06-SRNP-7197        | MHAHJ729-07           | JF752450                     |
| 4367              | Astraptles YESENN | Eudaminae        | 06-SRNP-45902       | MHAHI017-06           | GU155817                     |

| <b>Tree Order</b> | <b>Species</b>   | <b>Subfamily</b> | <b>ACG Sampleid</b> | <b>BOLD Processid</b> | <b>Genbank Accession</b> |
|-------------------|------------------|------------------|---------------------|-----------------------|--------------------------|
| 4368              | Astraptes YESENN | Eudaminae        | 06-SRNP-7523        | MHAHJ574-07           | JF752443                 |
| 4369              | Astraptes YESENN | Eudaminae        | 03-SRNP-12813.1     | MHAHH352-06           | GU155186                 |
| 4370              | Astraptes YESENN | Eudaminae        | 03-SRNP-20867       | MHAHH353-06           | GU155184                 |
| 4371              | Astraptes YESENN | Eudaminae        | 03-SRNP-20900       | MHAHH346-06           | GU155189                 |
| 4372              | Astraptes YESENN | Eudaminae        | 03-SRNP-31190       | MHAHH348-06           | GU155192                 |
| 4373              | Astraptes YESENN | Eudaminae        | 03-SRNP-9131        | MHAHH335-06           | GU155179                 |
| 4374              | Astraptes YESENN | Eudaminae        | 03-SRNP-13054.1     | MHAHH342-06           | GU155183                 |
| 4375              | Astraptes YESENN | Eudaminae        | 03-SRNP-19233       | MHAHH174-06           | GU155123                 |
| 4376              | Astraptes YESENN | Eudaminae        | 03-SRNP-21719       | MHAHH187-06           | GU155129                 |
| 4377              | Astraptes YESENN | Eudaminae        | 03-SRNP-20039       | MHAHH303-06           | GU155170                 |
| 4378              | Astraptes YESENN | Eudaminae        | 03-SRNP-12396.1     | MHAHH310-06           | GU155172                 |
| 4379              | Astraptes YESENN | Eudaminae        | 03-SRNP-5830        | MHAHH292-06           | GU155167                 |
| 4380              | Astraptes YESENN | Eudaminae        | 03-SRNP-18629       | MHAHH300-06           | GU155169                 |
| 4381              | Astraptes YESENN | Eudaminae        | 03-SRNP-19981       | MHAHH155-06           | GU155117                 |
| 4382              | Astraptes YESENN | Eudaminae        | 03-SRNP-12811.1     | MHAHH158-06           | GU155196                 |
| 4383              | Astraptes YESENN | Eudaminae        | 06-SRNP-2596        | MHAHG458-06           | GU151194                 |
| 4384              | Astraptes YESENN | Eudaminae        | 03-SRNP-19923       | MHAHH154-06           | GU155113                 |
| 4385              | Astraptes YESENN | Eudaminae        | 06-SRNP-35002       | MHAHG448-06           | GU151189                 |
| 4386              | Astraptes YESENN | Eudaminae        | 05-SRNP-343         | MHAHG399-06           | GU151184                 |
| 4387              | Astraptes YESENN | Eudaminae        | 05-SRNP-46248       | MHAHG389-06           | GU151181                 |
| 4388              | Astraptes YESENN | Eudaminae        | 05-SRNP-46247       | MHAHG388-06           | GU151182                 |
| 4389              | Astraptes YESENN | Eudaminae        | 05-SRNP-23710       | MHAHG467-06           | GU151197                 |
| 4390              | Astraptes YESENN | Eudaminae        | 07-SRNP-1582        | MHAHL284-07           | JF761649                 |
| 4391              | Astraptes YESENN | Eudaminae        | 04-SRNP-46657       | MHAHH384-06           | GU155193                 |
| 4392              | Astraptes YESENN | Eudaminae        | 04-SRNP-46761       | MHAHH372-06           | GU155194                 |
| 4393              | Astraptes YESENN | Eudaminae        | 03-SRNP-29977       | MHAHH334-06           | GU155180                 |
| 4394              | Astraptes YESENN | Eudaminae        | 03-SRNP-19925       | MHAHH333-06           | GU155181                 |
| 4395              | Astraptes YESENN | Eudaminae        | 04-SRNP-61087       | MHAHH266-06           | GU155158                 |
| 4396              | Astraptes YESENN | Eudaminae        | 04-SRNP-42351       | MHAHH236-06           | GU155155                 |
| 4397              | Astraptes YESENN | Eudaminae        | 04-SRNP-21144       | MHAHH235-06           | GU155154                 |
| 4398              | Astraptes YESENN | Eudaminae        | 03-SRNP-17617       | MHAHH222-06           | GU155148                 |
| 4399              | Astraptes YESENN | Eudaminae        | 03-SRNP-19500       | MHAHH221-06           | GU155149                 |
| 4400              | Astraptes YESENN | Eudaminae        | 03-SRNP-11292       | MHAHH211-06           | GU155143                 |
| 4401              | Astraptes YESENN | Eudaminae        | 03-SRNP-11291       | MHAHH210-06           | GU155147                 |
| 4402              | Astraptes YESENN | Eudaminae        | 03-SRNP-13084.1     | MHAHH208-06           | GU155146                 |
| 4403              | Astraptes YESENN | Eudaminae        | 03-SRNP-31311       | MHAHH207-06           | GU155144                 |
| 4404              | Astraptes YESENN | Eudaminae        | 04-SRNP-56956       | MHAHG425-06           | GU151187                 |
| 4405              | Astraptes YESENN | Eudaminae        | 04-SRNP-56955       | MHAHG377-06           | GU151179                 |
| 4406              | Astraptes YESENN | Eudaminae        | 03-SRNP-31192       | MHAHH343-06           | GU155177                 |
| 4407              | Astraptes YESENN | Eudaminae        | 06-SRNP-46048       | MHAHJ936-07           | JF752464                 |
| 4408              | Astraptes YESENN | Eudaminae        | 03-SRNP-8219        | MHAHH194-06           | GU155134                 |
| 4409              | Astraptes YESENN | Eudaminae        | 03-SRNP-21599       | MHAHH186-06           | GU155130                 |
| 4410              | Astraptes YESENN | Eudaminae        | 05-SRNP-2166        | MHAHG381-06           | GU151180                 |
| 4411              | Astraptes YESENN | Eudaminae        | 06-SRNP-35000       | MHAHG457-06           | GU151193                 |
| 4412              | Astraptes YESENN | Eudaminae        | 06-SRNP-2689        | MHAHG461-06           | GU151195                 |
| 4413              | Astraptes YESENN | Eudaminae        | 07-SRNP-3219        | MHM XO866-08          | JF761660                 |
| 4414              | Astraptes YESENN | Eudaminae        | 06-SRNP-35003       | MHAHG450-06           | GU151190                 |
| 4415              | Astraptes YESENN | Eudaminae        | 01-SRNP-9652        | EPAF401-03            | AY666741                 |
| 4416              | Astraptes YESENN | Eudaminae        | 07-SRNP-31395       | MHAHL297-07           | JF761650                 |
| 4417              | Astraptes YESENN | Eudaminae        | 06-SRNP-7000        | MHAHJ579-07           | JF752445                 |
| 4418              | Astraptes YESENN | Eudaminae        | 00-SRNP-11880       | EPAF484-03            | AY666616                 |
| 4419              | Astraptes YESENN | Eudaminae        | 99-SRNP-3015        | EPAF194-03            | AY667006                 |
| 4420              | Astraptes YESENN | Eudaminae        | 02-SRNP-30212       | EPAF296-03            | AY667046                 |
| 4421              | Astraptes YESENN | Eudaminae        | 02-SRNP-30211       | EPAF298-03            | AY667039                 |
| 4422              | Astraptes YESENN | Eudaminae        | 00-SRNP-11188       | EPAF213-03            | AY666958                 |
| 4423              | Astraptes YESENN | Eudaminae        | 94-SRNP-9330        | EPAF060-03            | AY666880                 |

| <b>Tree Order</b> | <b>Species</b>   | <b>Subfamily</b> | <b>ACG Sampleid</b> | <b>BOLD Processid</b> | <b>Genbank Accession</b> |
|-------------------|------------------|------------------|---------------------|-----------------------|--------------------------|
| 4424              | Astraptes YESENN | Eudaminae        | 02-SRNP-19308       | EPAF294-03            | AY666795                 |
| 4425              | Astraptes YESENN | Eudaminae        | 98-SRNP-6561        | EPAF164-03            | AY666662                 |
| 4426              | Astraptes YESENN | Eudaminae        | 02-SRNP-31858       | EPAF361-03            | AY666952                 |
| 4427              | Astraptes YESENN | Eudaminae        | 02-SRNP-29805       | EPAF304-03            | AY667028                 |
| 4428              | Astraptes YESENN | Eudaminae        | 02-SRNP-30062       | EPAF301-03            | AY667042                 |
| 4429              | Astraptes YESENN | Eudaminae        | 02-SRNP-33820       | EPAF369-03            | AY666802                 |
| 4430              | Astraptes YESENN | Eudaminae        | 02-SRNP-30059       | EPAF307-03            | AY667019                 |
| 4431              | Astraptes YESENN | Eudaminae        | 02-SRNP-20190       | EPAF367-03            | AY666806                 |
| 4432              | Astraptes YESENN | Eudaminae        | 02-SRNP-21384       | EPAF354-03            | AY666985                 |
| 4433              | Astraptes YESENN | Eudaminae        | 99-SRNP-4820        | EPAF467-03            | AY666642                 |
| 4434              | Astraptes YESENN | Eudaminae        | 99-SRNP-203         | EPAF458-03            | AY666652                 |
| 4435              | Astraptes YESENN | Eudaminae        | 99-SRNP-11          | EPAF454-03            | AY666660                 |
| 4436              | Astraptes YESENN | Eudaminae        | 99-SRNP-386         | EPAF460-03            | AY666649                 |
| 4437              | Astraptes YESENN | Eudaminae        | 99-SRNP-12          | EPAF411-03            | AY666769                 |
| 4438              | Astraptes YESENN | Eudaminae        | 99-SRNP-2446        | EPAF178-03            | AY666618                 |
| 4439              | Astraptes YESENN | Eudaminae        | 01-SRNP-6896        | EPAF481-03            | AY666632                 |
| 4440              | Astraptes YESENN | Eudaminae        | 01-SRNP-1047        | EPAF400-03            | AY666743                 |
| 4441              | Astraptes YESENN | Eudaminae        | 00-SRNP-22164       | EPAF399-03            | AY666770                 |
| 4442              | Astraptes YESENN | Eudaminae        | 02-SRNP-9496        | EPAF403-03            | AY666753                 |
| 4443              | Astraptes YESENN | Eudaminae        | 98-SRNP-14632       | EPAF446-03            | AY666685                 |
| 4444              | Astraptes YESENN | Eudaminae        | 03-SRNP-20899       | MHAHH199-06           | GU155140                 |
| 4445              | Astraptes YESENN | Eudaminae        | 02-SRNP-23365       | EPAF279-03            | AY666832                 |
| 4446              | Astraptes YESENN | Eudaminae        | 98-SRNP-7874        | EPAF409-03            | AY666744                 |
| 4447              | Astraptes YESENN | Eudaminae        | 99-SRNP-301         | EPAF459-03            | AY666644                 |
| 4448              | Astraptes YESENN | Eudaminae        | 98-SRNP-4773        | EPAF451-03            | AY666661                 |
| 4449              | Astraptes YESENN | Eudaminae        | 06-SRNP-41253       | MHAHH485-06           | GU155199                 |
| 4450              | Astraptes YESENN | Eudaminae        | 06-SRNP-35006       | MHAHG452-06           | GU151191                 |
| 4451              | Astraptes YESENN | Eudaminae        | 06-SRNP-45767       | MHAHI011-06           | GU155820                 |
| 4452              | Astraptes YESENN | Eudaminae        | 07-SRNP-42668       | MHMXT034-08           | JF761653                 |
| 4453              | Astraptes YESENN | Eudaminae        | 09-SRNP-57375       | MHMYE1404-09          | HM424353                 |
| 4454              | Astraptes YESENN | Eudaminae        | 03-SRNP-19491       | MHAHH309-06           | GU155171                 |
| 4455              | Astraptes YESENN | Eudaminae        | 03-SRNP-1327        | MHAHH285-06           | GU155161                 |
| 4456              | Astraptes YESENN | Eudaminae        | 06-SRNP-45771       | MHAHI003-06           | GU155824                 |
| 4457              | Astraptes YESENN | Eudaminae        | 06-SRNP-3660        | MHAHI004-06           | GU155816                 |
| 4458              | Astraptes YESENN | Eudaminae        | 03-SRNP-12405.1     | MHAHH157-06           | GU155197                 |
| 4459              | Astraptes YESENN | Eudaminae        | 07-SRNP-23600       | MHMXT011-08           | JF761656                 |
| 4460              | Astraptes YESENN | Eudaminae        | 08-SRNP-1537        | MHMXW155-09           | JF753702                 |
| 4461              | Astraptes YESENN | Eudaminae        | 06-SRNP-5657        | MHAHI007-06           | GU155822                 |
| 4462              | Astraptes YESENN | Eudaminae        | 03-SRNP-7325        | MHAHH294-06           | GU155162                 |
| 4463              | Astraptes YESENN | Eudaminae        | 03-SRNP-19236       | MHAHH328-06           | GU155176                 |
| 4464              | Astraptes YESENN | Eudaminae        | 03-SRNP-16333       | MHAHH286-06           | GU155163                 |
| 4465              | Astraptes YESENN | Eudaminae        | 03-SRNP-16844       | MHAHH289-06           | GU155168                 |
| 4466              | Astraptes YESENN | Eudaminae        | 03-SRNP-30303       | MHAHH336-06           | GU155178                 |
| 4467              | Astraptes YESENN | Eudaminae        | 06-SRNP-43726       | MHAHJ585-07           | JF752447                 |
| 4468              | Astraptes YESENN | Eudaminae        | 03-SRNP-12638.1     | MHAHH179-06           | GU155126                 |
| 4469              | Astraptes YESENN | Eudaminae        | 03-SRNP-37033       | MHAHH183-06           | GU155120                 |
| 4470              | Astraptes YESENN | Eudaminae        | 03-SRNP-19241       | MHAHH176-06           | GU155125                 |
| 4471              | Astraptes YESENN | Eudaminae        | 03-SRNP-20422       | MHAHH178-06           | GU155127                 |
| 4472              | Astraptes YESENN | Eudaminae        | 03-SRNP-15876       | MHAHH171-06           | GU155119                 |
| 4473              | Astraptes YESENN | Eudaminae        | 03-SRNP-4202        | MHAHH169-06           | GU155114                 |
| 4474              | Astraptes YESENN | Eudaminae        | 06-SRNP-35033       | MHAHG455-06           | GU151192                 |
| 4475              | Astraptes YESENN | Eudaminae        | 04-SRNP-27148       | MHAHG404-06           | GU151185                 |
| 4476              | Astraptes YESENN | Eudaminae        | 05-SRNP-41425       | MHAHG393-06           | GU151183                 |
| 4477              | Astraptes YESENN | Eudaminae        | 05-SRNP-23696       | MHAHG470-06           | GU151200                 |
| 4478              | Astraptes YESENN | Eudaminae        | 05-SRNP-23780       | MHAHG466-06           | GU151198                 |
| 4479              | Astraptes YESENN | Eudaminae        | 06-SRNP-2688        | MHAHG460-06           | GU151196                 |



| <b>Tree Order</b> | <b>Species</b>    | <b>Subfamily</b> | <b>ACG Sampleid</b> | <b>BOLD Processid</b> | <b>Genbank Accession</b> |
|-------------------|-------------------|------------------|---------------------|-----------------------|--------------------------|
| 4480              | Astraptles YESENN | Eudaminae        | 95-SRNP-4464        | EPAF069-03            | AY666860                 |
| 4481              | Astraptles YESENN | Eudaminae        | 02-SRNP-33384       | EPAF362-03            | AY666948                 |
| 4482              | Astraptles YESENN | Eudaminae        | 02-SRNP-31970       | EPAF352-03            | AY666956                 |
| 4483              | Astraptles YESENN | Eudaminae        | 00-SRNP-20862       | EPAF225-03            | AY666862                 |
| 4484              | Astraptles YESENN | Eudaminae        | 01-SRNP-9728        | EPAF439-03            | AY666686                 |
| 4485              | Astraptles YESENN | Eudaminae        | 97-SRNP-6181        | EPAF445-03            | AY666677                 |
| 4486              | Astraptles YESENN | Eudaminae        | 99-SRNP-4773        | EPAF466-03            | AY666636                 |
| 4487              | Astraptles YESENN | Eudaminae        | 98-SRNP-15072       | EPAF448-03            | AY666673                 |
| 4488              | Astraptles YESENN | Eudaminae        | 00-SRNP-10415       | EPAF222-03            | AY666949                 |
| 4489              | Astraptles YESENN | Eudaminae        | 02-SRNP-17335       | EPAF263-03            | AY666597                 |
| 4490              | Astraptles YESENN | Eudaminae        | 03-SRNP-19235       | MHAHH177-06           | GU155128                 |
| 4491              | Astraptles YESENN | Eudaminae        | 04-SRNP-30116       | MHAHH181-06           | GU155124                 |
| 4492              | Astraptles YESENN | Eudaminae        | 03-SRNP-21722       | MHAHH185-06           | GU155132                 |
| 4493              | Astraptles YESENN | Eudaminae        | 03-SRNP-21302       | MHAHH198-06           | GU155137                 |
| 4494              | Astraptles YESENN | Eudaminae        | 04-SRNP-47991       | MHAHH233-06           | GU155152                 |
| 4495              | Astraptles YESENN | Eudaminae        | 04-SRNP-56475       | MHAHH269-06           | GU155159                 |
| 4496              | Astraptles YESENN | Eudaminae        | 03-SRNP-11346       | MHAHH293-06           | GU155164                 |
| 4497              | Astraptles YESENN | Eudaminae        | 03-SRNP-2947        | MHAHH296-06           | GU155160                 |
| 4498              | Astraptles YESENN | Eudaminae        | 03-SRNP-31288       | MHAHH349-06           | GU155190                 |
| 4499              | Astraptles YESENN | Eudaminae        | 04-SRNP-45272       | MHAHH379-06           | GU155195                 |
| 4500              | Astraptles YESENN | Eudaminae        | 06-SRNP-22582       | MHAHJ796-07           | JF752454                 |
| 4501              | Astraptles YESENN | Eudaminae        | 06-SRNP-7387        | MHAHJ586-07           | JF752448                 |
| 4502              | Astraptles YESENN | Eudaminae        | 06-SRNP-23309       | MHAHJ799-07           | JF752455                 |
| 4503              | Astraptles YESENN | Eudaminae        | 06-SRNP-23308       | MHAHJ812-07           | JF752460                 |
| 4504              | Astraptles YESENN | Eudaminae        | 06-SRNP-46392       | MHAHJ941-07           | JF752465                 |
| 4505              | Astraptles YESENN | Eudaminae        | 09-SRNP-21124       | MHMYH115-10           | HM887267                 |
| 4506              | Astraptles YESENN | Eudaminae        | 09-SRNP-80729       | MHMYH116-10           | HM887268                 |
| 4507              | Astraptles YESENN | Eudaminae        | 03-SRNP-1328        | MHAHH287-06           | GU155166                 |
| 4508              | Astraptles YESENN | Eudaminae        | 99-SRNP-17158       | EPAF455-03            | AY666669                 |
| 4509              | Astraptles YESENN | Eudaminae        | 04-SRNP-35012       | MHAHH192-06           | GU155133                 |
| 4510              | Astraptles YESENN | Eudaminae        | 02-SRNP-29803       | EPAF289-03            | AY666804                 |
| 4511              | Astraptles YESENN | Eudaminae        | 02-SRNP-18849       | EPAF285-03            | AY666856                 |
| 4512              | Astraptles YESENN | Eudaminae        | 02-SRNP-19921       | EPAF345-03            | AY666971                 |
| 4513              | Astraptles YESENN | Eudaminae        | 06-SRNP-33146       | MHAHI511-06           | GU155821                 |
| 4514              | Astraptles YESENN | Eudaminae        | 07-SRNP-1583        | MHAHL280-07           | JF761648                 |
| 4515              | Astraptles YESENN | Eudaminae        | 06-SRNP-46808       | MHAHJ932-07           | JF752463                 |
| 4516              | Astraptles YESENN | Eudaminae        | 06-SRNP-46810       | MHAHJ927-07           | JF752462                 |
| 4517              | Astraptles YESENN | Eudaminae        | 06-SRNP-21578       | MHAHJ808-07           | JF752458                 |
| 4518              | Astraptles YESENN | Eudaminae        | 06-SRNP-21607       | MHAHJ801-07           | JF752456                 |
| 4519              | Astraptles YESENN | Eudaminae        | 06-SRNP-22150       | MHAHJ795-07           | JF752453                 |
| 4520              | Astraptles YESENN | Eudaminae        | 06-SRNP-46491       | MHAHJ665-07           | JF752449                 |
| 4521              | Astraptles YESENN | Eudaminae        | 06-SRNP-43633       | MHAHJ583-07           | JF752446                 |
| 4522              | Astraptles YESENN | Eudaminae        | 06-SRNP-45450       | MHAHI018-06           | GU155818                 |
| 4523              | Astraptles YESENN | Eudaminae        | 06-SRNP-2751        | MHAHH490-06           | GU155200                 |
| 4524              | Astraptles YESENN | Eudaminae        | 04-SRNP-46943       | MHAHH371-06           | GU155115                 |
| 4525              | Astraptles YESENN | Eudaminae        | 03-SRNP-12768.1     | MHAHH351-06           | GU155188                 |
| 4526              | Astraptles YESENN | Eudaminae        | 03-SRNP-13044.1     | MHAHH344-06           | GU155187                 |
| 4527              | Astraptles YESENN | Eudaminae        | 03-SRNP-31188       | MHAHH331-06           | GU155173                 |
| 4528              | Astraptles YESENN | Eudaminae        | 03-SRNP-12300.1     | MHAHH297-06           | GU155116                 |
| 4529              | Astraptles YESENN | Eudaminae        | 03-SRNP-28876       | MHAHH339-06           | GU155185                 |
| 4530              | Astraptles YESENN | Eudaminae        | 03-SRNP-15893       | MHAHH209-06           | GU155145                 |
| 4531              | Astraptles YESENN | Eudaminae        | 03-SRNP-5207        | MHAHH288-06           | GU155165                 |
| 4532              | Astraptles YESENN | Eudaminae        | 03-SRNP-28260       | MHAHH205-06           | GU155139                 |
| 4533              | Astraptles YESENN | Eudaminae        | 03-SRNP-19922       | MHAHH206-06           | GU155138                 |
| 4534              | Astraptles YESENN | Eudaminae        | 03-SRNP-31295       | MHAHH197-06           | GU155136                 |
| 4535              | Astraptles YESENN | Eudaminae        | 03-SRNP-13045.1     | MHAHH193-06           | GU155135                 |

| <b>Tree Order</b> | <b>Species</b>   | <b>Subfamily</b> | <b>ACG Sampleid</b> | <b>BOLD Processid</b> | <b>Genbank Accession</b> |
|-------------------|------------------|------------------|---------------------|-----------------------|--------------------------|
| 4536              | Astraptes YESENN | Eudaminae        | 03-SRNP-37165       | MHAHH184-06           | GU155131                 |
| 4537              | Astraptes YESENN | Eudaminae        | 03-SRNP-18626       | MHAHH175-06           | GU155122                 |
| 4538              | Astraptes YESENN | Eudaminae        | 98-SRNP-6537        | EPAF452-03            | AY666666                 |
| 4539              | Astraptes YESENN | Eudaminae        | 04-SRNP-46760       | MHAHH231-06           | GU155153                 |
| 4540              | Astraptes YESENN | Eudaminae        | 05-SRNP-23548       | MHAHG471-06           | GU151199                 |
| 4541              | Astraptes YESENN | Eudaminae        | 03-SRNP-28257       | MHAHH172-06           | GU155121                 |
| 4542              | Astraptes YESENN | Eudaminae        | 03-SRNP-28256       | MHAHH203-06           | GU155141                 |
| 4543              | Astraptes YESENN | Eudaminae        | 05-SRNP-65076       | MHAHG468-06           | GU151201                 |
| 4544              | Astraptes YESENN | Eudaminae        | 06-SRNP-43453       | MHAHI513-06           | GU155814                 |
| 4545              | Astraptes YESENN | Eudaminae        | 89-SRNP-112         | EPAF006-03            | AY666945                 |
| 4546              | Astraptes YESENN | Eudaminae        | 99-SRNP-155         | EPAF177-03            | AY666637                 |
| 4547              | Astraptes YESENN | Eudaminae        | 99-SRNP-4383        | EPAF176-03            | AY666622                 |
| 4548              | Astraptes YESENN | Eudaminae        | 00-SRNP-11805       | EPAF220-03            | AY666954                 |
| 4549              | Astraptes YESENN | Eudaminae        | 02-SRNP-19802       | EPAF328-03            | AY667001                 |
| 4550              | Astraptes YESENN | Eudaminae        | 02-SRNP-19922       | EPAF353-03            | AY666965                 |
| 4551              | Astraptes YESENN | Eudaminae        | 98-SRNP-7848        | EPAF453-03            | AY666664                 |
| 4552              | Astraptes YESENN | Eudaminae        | 01-SRNP-6800        | EPAF238-03            | AY666680                 |
| 4553              | Astraptes YESENN | Eudaminae        | 99-SRNP-4436        | EPAF465-03            | AY666701                 |
| 4554              | Astraptes YESENN | Eudaminae        | 98-SRNP-15015       | EPAF447-03            | AY666702                 |
| 4555              | Astraptes YESENN | Eudaminae        | 97-SRNP-6252        | EPAF133-03            | AY666750                 |
| 4556              | Astraptes YESENN | Eudaminae        | 98-SRNP-2712        | EPAF170-03            | AY666683                 |
| 4557              | Astraptes YESENN | Eudaminae        | 00-SRNP-22003       | EPAF227-03            | AY666845                 |
| 4558              | Astraptes YESENN | Eudaminae        | 98-SRNP-6332        | EPAF408-03            | AY666732                 |
| 4559              | Astraptes YESENN | Eudaminae        | 99-SRNP-525         | EPAF415-03            | AY666717                 |
| 4560              | Astraptes YESENN | Eudaminae        | 95-SRNP-4402        | EPAF068-03            | AY666874                 |
| 4561              | Astraptes YESENN | Eudaminae        | 99-SRNP-524         | EPAF468-03            | AY666631                 |
| 4562              | Astraptes YESENN | Eudaminae        | 99-SRNP-4418        | EPAF414-03            | AY666728                 |
| 4563              | Astraptes YESENN | Eudaminae        | 99-SRNP-2444        | EPAF413-03            | AY666736                 |
| 4564              | Astraptes YESENN | Eudaminae        | 06-SRNP-7361        | MHAHJ734-07           | JF752452                 |
| 4565              | Astraptes YESENN | Eudaminae        | 06-SRNP-47922       | MHAHK253-07           | JF760394                 |
| 4566              | Astraptes YESENN | Eudaminae        | 07-SRNP-1266        | MHMXXK336-07          | JF761666                 |
| 4567              | Astraptes YESENN | Eudaminae        | 07-SRNP-42069       | MHMXXO865-08          | JF761661                 |
| 4568              | Astraptes YESENN | Eudaminae        | 07-SRNP-65846       | MHMXR720-08           | JF761659                 |
| 4569              | Astraptes YESENN | Eudaminae        | 08-SRNP-2539        | MHMXXW175-09          | JF753698                 |
| 4570              | Astraptes YESENN | Eudaminae        | 09-SRNP-2732        | MHMYH118-10           | HM887270                 |
| 4571              | Astraptes YESENN | Eudaminae        | 06-SRNP-7524        | MHAHJ731-07           | JF752451                 |
| 4572              | Astraptes YESENN | Eudaminae        | 06-SRNP-7624        | MHAHJ576-07           | JF752444                 |
| 4573              | Astraptes YESENN | Eudaminae        | 06-SRNP-46103       | MHAHI016-06           | GU155819                 |
| 4574              | Astraptes YESENN | Eudaminae        | 04-SRNP-47834       | MHAHH252-06           | GU155156                 |
| 4575              | Astraptes YESENN | Eudaminae        | 03-SRNP-19933       | MHAHH202-06           | GU155142                 |
| 4576              | Astraptes YESENN | Eudaminae        | 06-SRNP-5658        | MHAHI008-06           | GU155823                 |
| 4577              | Astraptes YESENN | Eudaminae        | 93-SRNP-3364        | EPAF038-03            | AY666909                 |
| 4578              | Astraptes YESENN | Eudaminae        | 03-SRNP-23561       | MHAHH220-06           | GU155150                 |
| 4579              | Astraptes YESENN | Eudaminae        | 99-SRNP-402         | EPAF461-03            | AY666647                 |
| 4580              | Astraptes YESENN | Eudaminae        | 06-SRNP-5995        | MHAHJ804-07           | JF752457                 |
| 4581              | Astraptes YESENN | Eudaminae        | 06-SRNP-22572       | MHAHJ811-07           | JF752459                 |
| 4582              | Astraptes YESENN | Eudaminae        | 09-SRNP-20756       | MHMYH183-10           | HM887330                 |
| 4583              | Astraptes LONCHO | Eudaminae        | 04-SRNP-35659       | MHAHH255-06           | GU155085                 |
| 4584              | Astraptes LONCHO | Eudaminae        | 97-SRNP-721         | EPAF118-03            | AY666781                 |
| 4585              | Astraptes LONCHO | Eudaminae        | 04-SRNP-35510       | MHAHH229-06           | GU155082                 |
| 4586              | Astraptes LONCHO | Eudaminae        | 02-SRNP-8471        | EPAF253-03            | AY667047                 |
| 4587              | Astraptes LONCHO | Eudaminae        | 02-SRNP-9547        | EPAF261-03            | AY666602                 |
| 4588              | Astraptes LONCHO | Eudaminae        | 02-SRNP-8068        | EPAF249-03            | AY666691                 |
| 4589              | Astraptes LONCHO | Eudaminae        | 02-SRNP-8361        | EPAF380-03            | AY667051                 |
| 4590              | Astraptes LONCHO | Eudaminae        | 02-SRNP-8165        | EPAF379-03            | AY667057                 |
| 4591              | Astraptes LONCHO | Eudaminae        | 97-SRNP-840         | EPAF119-03            | AY666784                 |

| <b>Tree Order</b> | <b>Species</b>    | <b>Subfamily</b> | <b>ACG Sampleid</b> | <b>BOLD Processid</b> | <b>Genbank Accession</b> |
|-------------------|-------------------|------------------|---------------------|-----------------------|--------------------------|
| 4592              | Astraptles LONCHO | Eudaminae        | 04-SRNP-35270       | MHAHH238-06           | GU155083                 |
| 4593              | Astraptles LONCHO | Eudaminae        | 04-SRNP-35660       | MHAHH246-06           | GU155084                 |
| 4594              | Astraptles LONCHO | Eudaminae        | 03-SRNP-22396       | MHAHH314-06           | GU155086                 |
| 4595              | Astraptles LONCHO | Eudaminae        | 06-SRNP-35047       | MHAHG451-06           | GU151148                 |
| 4596              | Astraptles LONCHO | Eudaminae        | 00-SRNP-10977       | EPAF224-03            | AY666861                 |
| 4597              | Astraptles LONCHO | Eudaminae        | 02-SRNP-9135        | EPAF260-03            | AY666617                 |
| 4598              | Astraptles LONCHO | Eudaminae        | 98-SRNP-2703        | EPAF166-03            | AY666654                 |
| 4599              | Astraptles LONCHO | Eudaminae        | 00-SRNP-10502       | EPAF223-03            | AY667052                 |
| 4600              | Astraptles LONCHO | Eudaminae        | 99-SRNP-17068       | EPAF412-03            | AY666724                 |
| 4601              | Astraptles LONCHO | Eudaminae        | 01-SRNP-21505       | EPAF247-03            | AY666653                 |
| 4602              | Astraptles LONCHO | Eudaminae        | 99-SRNP-17184       | EPAF456-03            | AY666658                 |
| 4603              | Astraptles LONCHO | Eudaminae        | 02-SRNP-9976        | EPAF267-03            | AY666704                 |
| 4604              | Astraptles LONCHO | Eudaminae        | 00-SRNP-10501       | EPAF438-03            | AY666690                 |
| 4605              | Astraptles LONCHO | Eudaminae        | 00-SRNP-10500       | EPAF437-03            | AY666676                 |
| 4606              | Astraptles LONCHO | Eudaminae        | 89-SRNP-736         | EPAF381-03            | AY666779                 |
| 4607              | Astraptles LONCHO | Eudaminae        | 97-SRNP-1147        | EPAF121-03            | AY666790                 |
| 4608              | Astraptles LONCHO | Eudaminae        | 97-SRNP-842         | EPAF120-03            | AY666782                 |
| 4609              | Astraptles LONCHO | Eudaminae        | 02-SRNP-9448        | EPAF258-03            | AY666610                 |
| 4610              | Astraptles LONCHO | Eudaminae        | 97-SRNP-1856        | EPAF382-03            | AY666788                 |
| 4611              | Astraptles LONCHO | Eudaminae        | 02-SRNP-8281        | EPAF256-03            | AY666634                 |
| 4612              | Astraptles LONCHO | Eudaminae        | 97-SRNP-724         | EPAF377-03            | AY666785                 |
| 4613              | Astraptles LONCHO | Eudaminae        | 02-SRNP-8140        | EPAF254-03            | AY666613                 |
| 4614              | Astraptles LONCHO | Eudaminae        | 97-SRNP-1127        | EPAF123-03            | AY666776                 |
| 4615              | Astraptles LONCHO | Eudaminae        | 97-SRNP-755         | EPAF116-03            | AY666793                 |
| 4616              | Astraptles LONCHO | Eudaminae        | 02-SRNP-8439        | EPAF422-03            | AY666719                 |
| 4617              | Astraptles LONCHO | Eudaminae        | 00-SRNP-9539        | EPAF421-03            | AY666707                 |
| 4618              | Astraptles LONCHO | Eudaminae        | 02-SRNP-8360        | EPAF255-03            | AY666611                 |
| 4619              | Astraptles LONCHO | Eudaminae        | 97-SRNP-722         | EPAF376-03            | AY666780                 |
| 4620              | Astraptles LONCHO | Eudaminae        | 00-SRNP-9040        | EPAF211-03            | AY666967                 |
| 4621              | Astraptles LONCHO | Eudaminae        | 02-SRNP-8249        | EPAF250-03            | AY666628                 |
| 4622              | Astraptles LONCHO | Eudaminae        | 02-SRNP-8343        | EPAF257-03            | AY666640                 |
| 4623              | Astraptles LONCHO | Eudaminae        | 01-SRNP-21520       | EPAF423-03            | AY666712                 |
| 4624              | Astraptles LONCHO | Eudaminae        | 97-SRNP-1050        | EPAF113-03            | AY666799                 |
| 4625              | Astraptles LONCHO | Eudaminae        | 02-SRNP-8438        | EPAF259-03            | AY666609                 |
| 4626              | Astraptles LONCHO | Eudaminae        | 97-SRNP-723         | EPAF117-03            | AY666791                 |
| 4627              | Astraptles LONCHO | Eudaminae        | 97-SRNP-720         | EPAF115-03            | AY666826                 |
| 4628              | Astraptles LONCHO | Eudaminae        | 02-SRNP-24219       | EPAF370-03            | AY666800                 |
| 4629              | Astraptles LONCHO | Eudaminae        | 99-SRNP-17162       | EPAF209-03            | AY666977                 |
| 4630              | Astraptles LONCHO | Eudaminae        | 07-SRNP-35892       | MHAHL292-07           | JF761616                 |
| 4631              | Astraptles LONCHO | Eudaminae        | 07-SRNP-36055       | MHM XO835-08          | JF761619                 |
| 4632              | Astraptles LONCHO | Eudaminae        | 07-SRNP-45518       | MHM XO854-08          | JF761618                 |
| 4633              | Astraptles LONCHO | Eudaminae        | 07-SRNP-36122       | MHM XO857-08          | JF761617                 |
| 4634              | Astraptles LONCHO | Eudaminae        | 08-SRNP-36242       | MHM XX473-09          | JF777636                 |
| 4635              | Astraptles LONCHO | Eudaminae        | 08-SRNP-35999       | MHM XX477-09          | JF777637                 |
| 4636              | Astraptles LONCHO | Eudaminae        | 04-SRNP-56583       | MHAHG421-06           | GU151146                 |
| 4637              | Astraptles LONCHO | Eudaminae        | 06-SRNP-35016       | MHAHG453-06           | GU151147                 |
| 4638              | Astraptles LONCHO | Eudaminae        | 09-SRNP-36882       | MHMYG2028-10          | HM885429                 |
| 4639              | Astraptles SENNOV | Eudaminae        | 01-SRNP-2604        | EPAF240-03            | AY666693                 |
| 4640              | Astraptles SENNOV | Eudaminae        | 91-SRNP-2454        | EPAF013-03            | AY666925                 |
| 4641              | Astraptles SENNOV | Eudaminae        | 95-SRNP-4409        | EPAF067-03            | AY666882                 |
| 4642              | Astraptles SENNOV | Eudaminae        | 05-SRNP-45060       | MHAHG444-06           | GU151162                 |
| 4643              | Astraptles SENNOV | Eudaminae        | 93-SRNP-3363        | EPAF390-03            | AY666786                 |
| 4644              | Astraptles SENNOV | Eudaminae        | 92-SRNP-3975.1      | EPAF387-03            | AY666768                 |
| 4645              | Astraptles SENNOV | Eudaminae        | 95-SRNP-6137        | EPAF073-03            | AY666864                 |
| 4646              | Astraptles SENNOV | Eudaminae        | 93-SRNP-3377        | EPAF429-03            | AY666718                 |
| 4647              | Astraptles SENNOV | Eudaminae        | 90-SRNP-1711        | EPAF385-03            | AY666771                 |

| <b>Tree Order</b> | <b>Species</b>    | <b>Subfamily</b> | <b>ACG Sampleid</b> | <b>BOLD Processid</b> | <b>Genbank Accession</b> |
|-------------------|-------------------|------------------|---------------------|-----------------------|--------------------------|
| 4648              | Astraptles SENNOV | Eudaminae        | 92-SRNP-3975        | EPAF021-03            | AY666917                 |
| 4649              | Astraptles SENNOV | Eudaminae        | 96-SRNP-10407       | EPAF107-03            | AY666817                 |
| 4650              | Astraptles SENNOV | Eudaminae        | 99-SRNP-10683.1     | EPAF198-03            | AY667020                 |
| 4651              | Astraptles SENNOV | Eudaminae        | 96-SRNP-10408       | EPAF108-03            | AY666812                 |
| 4652              | Astraptles SENNOV | Eudaminae        | 94-SRNP-8089        | EPAF059-03            | AY666878                 |
| 4653              | Astraptles SENNOV | Eudaminae        | 96-SRNP-10410       | EPAF109-03            | AY666810                 |
| 4654              | Astraptles SENNOV | Eudaminae        | 96-SRNP-10409       | EPAF374-03            | AY666792                 |
| 4655              | Astraptles SENNOV | Eudaminae        | 04-SRNP-30803       | MHAHH234-06           | GU155097                 |
| 4656              | Astraptles SENNOV | Eudaminae        | 91-SRNP-1741        | EPAF478-03            | AY666614                 |
| 4657              | Astraptles SENNOV | Eudaminae        | 06-SRNP-19450       | MHAHK277-07           | JF760388                 |
| 4658              | Astraptles SENNOV | Eudaminae        | 99-SRNP-4144        | EPAF174-03            | AY666619                 |
| 4659              | Astraptles SENNOV | Eudaminae        | 06-SRNP-31423       | MHAHG465-06           | GU151165                 |
| 4660              | Astraptles SENNOV | Eudaminae        | 93-SRNP-954         | EPAF027-03            | AY666919                 |
| 4661              | Astraptles SENNOV | Eudaminae        | 93-SRNP-955         | EPAF391-03            | AY666787                 |
| 4662              | Astraptles SENNOV | Eudaminae        | 95-SRNP-8555        | EPAF375-03            | AY666789                 |
| 4663              | Astraptles SENNOV | Eudaminae        | 07-SRNP-45042       | MHMXXK346-07          | JF761624                 |
| 4664              | Astraptles SENNOV | Eudaminae        | 07-SRNP-45041       | MHMXXK348-07          | JF761623                 |
| 4665              | Astraptles SENNOV | Eudaminae        | 07-SRNP-45040       | MHMXXK332-07          | JF761626                 |
| 4666              | Astraptles SENNOV | Eudaminae        | 07-SRNP-45043       | MHMXXK333-07          | JF761625                 |
| 4667              | Astraptles SENNOV | Eudaminae        | 04-SRNP-46788       | MHAHH391-06           | GU155105                 |
| 4668              | Astraptles SENNOV | Eudaminae        | 06-SRNP-47119       | MHAHJ667-07           | JF752436                 |
| 4669              | Astraptles SENNOV | Eudaminae        | 05-SRNP-60388       | MHAHG473-06           | GU151167                 |
| 4670              | Astraptles SENNOV | Eudaminae        | 04-SRNP-46986       | MHAHH375-06           | GU155103                 |
| 4671              | Astraptles SENNOV | Eudaminae        | 05-SRNP-47264       | MHAHG442-06           | GU151151                 |
| 4672              | Astraptles SENNOV | Eudaminae        | 05-SRNP-59407       | MHAHG441-06           | GU151152                 |
| 4673              | Astraptles SENNOV | Eudaminae        | 05-SRNP-46328       | MHAHG434-06           | GU151160                 |
| 4674              | Astraptles SENNOV | Eudaminae        | 05-SRNP-46845       | MHAHG430-06           | GU151157                 |
| 4675              | Astraptles SENNOV | Eudaminae        | 05-SRNP-46843       | MHAHG429-06           | GU151158                 |
| 4676              | Astraptles SENNOV | Eudaminae        | 05-SRNP-59544       | MHAHG415-06           | GU151156                 |
| 4677              | Astraptles SENNOV | Eudaminae        | 05-SRNP-57580       | MHAHG394-06           | GU151154                 |
| 4678              | Astraptles SENNOV | Eudaminae        | 06-SRNP-20364       | MHAHG175-06           | GU151149                 |
| 4679              | Astraptles SENNOV | Eudaminae        | 04-SRNP-48059       | MHAHH227-06           | GU155095                 |
| 4680              | Astraptles SENNOV | Eudaminae        | 05-SRNP-46846       | MHAHG432-06           | GU151155                 |
| 4681              | Astraptles SENNOV | Eudaminae        | 95-SRNP-4807        | EPAF075-03            | AY666865                 |
| 4682              | Astraptles SENNOV | Eudaminae        | 99-SRNP-411         | EPAF184-03            | AY666603                 |
| 4683              | Astraptles SENNOV | Eudaminae        | 98-SRNP-2714        | EPAF167-03            | AY666645                 |
| 4684              | Astraptles SENNOV | Eudaminae        | 99-SRNP-413         | EPAF464-03            | AY666668                 |
| 4685              | Astraptles SENNOV | Eudaminae        | 99-SRNP-409         | EPAF490-03            | AY667043                 |
| 4686              | Astraptles SENNOV | Eudaminae        | 99-SRNP-412         | EPAF463-03            | AY666651                 |
| 4687              | Astraptles SENNOV | Eudaminae        | 95-SRNP-6435        | EPAF081-03            | AY666855                 |
| 4688              | Astraptles SENNOV | Eudaminae        | 96-SRNP-10154       | EPAF106-03            | AY666803                 |
| 4689              | Astraptles SENNOV | Eudaminae        | 93-SRNP-3603.2      | EPAF042-03            | AY666891                 |
| 4690              | Astraptles SENNOV | Eudaminae        | 89-SRNP-23          | EPAF005-03            | AY666931                 |
| 4691              | Astraptles SENNOV | Eudaminae        | 93-SRNP-5558.1      | EPAF420-03            | AY666709                 |
| 4692              | Astraptles SENNOV | Eudaminae        | 93-SRNP-3701        | EPAF039-03            | AY666905                 |
| 4693              | Astraptles SENNOV | Eudaminae        | 95-SRNP-8643        | EPAF086-03            | AY666843                 |
| 4694              | Astraptles SENNOV | Eudaminae        | 95-SRNP-9333        | EPAF395-03            | AY666751                 |
| 4695              | Astraptles SENNOV | Eudaminae        | 96-SRNP-8770        | EPAF102-03            | AY666869                 |
| 4696              | Astraptles SENNOV | Eudaminae        | 96-SRNP-8797        | EPAF103-03            | AY666911                 |
| 4697              | Astraptles SENNOV | Eudaminae        | 99-SRNP-207         | EPAF181-03            | AY666599                 |
| 4698              | Astraptles SENNOV | Eudaminae        | 95-SRNP-6869        | EPAF077-03            | AY666885                 |
| 4699              | Astraptles SENNOV | Eudaminae        | 99-SRNP-403         | EPAF462-03            | AY666643                 |
| 4700              | Astraptles SENNOV | Eudaminae        | 93-SRNP-2206        | EPAF389-03            | AY666778                 |
| 4701              | Astraptles SENNOV | Eudaminae        | 93-SRNP-2201        | EPAF388-03            | AY666766                 |
| 4702              | Astraptles SENNOV | Eudaminae        | 02-SRNP-13088       | EPAF277-03            | AY666828                 |
| 4703              | Astraptles SENNOV | Eudaminae        | 95-SRNP-4533        | EPAF489-03            | AY667045                 |

| <b>Tree Order</b> | <b>Species</b>    | <b>Subfamily</b> | <b>ACG Sampleid</b> | <b>BOLD Processid</b> | <b>Genbank Accession</b> |
|-------------------|-------------------|------------------|---------------------|-----------------------|--------------------------|
| 4704              | Astraptles SENNOV | Eudaminae        | 93-SRNP-1025        | EPAF028-03            | AY666920                 |
| 4705              | Astraptles SENNOV | Eudaminae        | 93-SRNP-2208        | EPAF428-03            | AY666735                 |
| 4706              | Astraptles SENNOV | Eudaminae        | 96-SRNP-8773        | EPAF104-03            | AY667036                 |
| 4707              | Astraptles SENNOV | Eudaminae        | 99-SRNP-399         | EPAF186-03            | AY666697                 |
| 4708              | Astraptles SENNOV | Eudaminae        | 92-SRNP-69          | EPAF426-03            | AY666711                 |
| 4709              | Astraptles SENNOV | Eudaminae        | 92-SRNP-70          | EPAF427-03            | AY666710                 |
| 4710              | Astraptles SENNOV | Eudaminae        | 96-SRNP-812         | EPAF397-03            | AY666761                 |
| 4711              | Astraptles SENNOV | Eudaminae        | 99-SRNP-410         | EPAF183-03            | AY666598                 |
| 4712              | Astraptles SENNOV | Eudaminae        | 95-SRNP-6476        | EPAF393-03            | AY666755                 |
| 4713              | Astraptles SENNOV | Eudaminae        | 91-SRNP-3005        | EPAF386-03            | AY666763                 |
| 4714              | Astraptles SENNOV | Eudaminae        | 96-SRNP-8769        | EPAF101-03            | AY666846                 |
| 4715              | Astraptles SENNOV | Eudaminae        | 04-SRNP-47619       | MHAHH228-06           | GU155096                 |
| 4716              | Astraptles SENNOV | Eudaminae        | 04-SRNP-47520       | MHAHH245-06           | GU155094                 |
| 4717              | Astraptles SENNOV | Eudaminae        | 04-SRNP-47264       | MHAHH263-06           | GU155090                 |
| 4718              | Astraptles SENNOV | Eudaminae        | 06-SRNP-46624       | MHAHJ939-07           | JF752438                 |
| 4719              | Astraptles SENNOV | Eudaminae        | 07-SRNP-23823       | MHMXR728-08           | JF761622                 |
| 4720              | Astraptles SENNOV | Eudaminae        | 99-SRNP-17188       | EPAF457-03            | AY666656                 |
| 4721              | Astraptles SENNOV | Eudaminae        | 03-SRNP-22238       | MHAHH196-06           | GU155092                 |
| 4722              | Astraptles SENNOV | Eudaminae        | 03-SRNP-22239       | MHAHH295-06           | GU155099                 |
| 4723              | Astraptles SENNOV | Eudaminae        | 06-SRNP-2651        | MHAHG462-06           | GU151164                 |
| 4724              | Astraptles SENNOV | Eudaminae        | 06-SRNP-36042       | MHMXH847-07           | JF760389                 |
| 4725              | Astraptles SENNOV | Eudaminae        | 03-SRNP-3011        | MHAHH168-06           | GU155091                 |
| 4726              | Astraptles SENNOV | Eudaminae        | 05-SRNP-55272       | MHAHG447-06           | GU151161                 |
| 4727              | Astraptles SENNOV | Eudaminae        | 05-SRNP-45346       | MHAHG391-06           | GU151153                 |
| 4728              | Astraptles SENNOV | Eudaminae        | 95-SRNP-10951       | EPAF089-03            | AY666850                 |
| 4729              | Astraptles SENNOV | Eudaminae        | 06-SRNP-47118       | MHAHJ622-07           | JF752434                 |
| 4730              | Astraptles SENNOV | Eudaminae        | 07-SRNP-58784       | MHMXR729-08           | JF761621                 |
| 4731              | Astraptles SENNOV | Eudaminae        | 92-SRNP-5660        | EPAF486-03            | AY667055                 |
| 4732              | Astraptles SENNOV | Eudaminae        | 06-SRNP-31380       | MHAHG464-06           | GU151166                 |
| 4733              | Astraptles SENNOV | Eudaminae        | 06-SRNP-46575       | MHAHJ670-07           | JF752437                 |
| 4734              | Astraptles SENNOV | Eudaminae        | 06-SRNP-46050       | MHAHJ624-07           | JF752435                 |
| 4735              | Astraptles SENNOV | Eudaminae        | 04-SRNP-49527       | MHAHH368-06           | GU155102                 |
| 4736              | Astraptles SENNOV | Eudaminae        | 04-SRNP-45246       | MHAHH366-06           | GU155101                 |
| 4737              | Astraptles SENNOV | Eudaminae        | 03-SRNP-22051       | MHAHH301-06           | GU155100                 |
| 4738              | Astraptles SENNOV | Eudaminae        | 05-SRNP-7221        | MHAHG477-06           | GU151163                 |
| 4739              | Astraptles SENNOV | Eudaminae        | 05-SRNP-46983       | MHAHG428-06           | GU151159                 |
| 4740              | Astraptles SENNOV | Eudaminae        | 04-SRNP-47268       | MHAHH247-06           | GU155098                 |
| 4741              | Astraptles SENNOV | Eudaminae        | 03-SRNP-14687       | MHAHH213-06           | GU155093                 |
| 4742              | Astraptles SENNOV | Eudaminae        | 06-SRNP-46931       | MHAHJ942-07           | JF752439                 |
| 4743              | Astraptles SENNOV | Eudaminae        | 06-SRNP-460         | MHAHG179-06           | GU151150                 |
| 4744              | Astraptles SENNOV | Eudaminae        | 91-SRNP-2715        | EPAF483-03            | AY666604                 |
| 4745              | Astraptles SENNOV | Eudaminae        | 93-SRNP-3656        | EPAF034-03            | AY666899                 |
| 4746              | Astraptles SENNOV | Eudaminae        | 93-SRNP-3655        | EPAF036-03            | AY666900                 |
| 4747              | Astraptles SENNOV | Eudaminae        | 96-SRNP-8802        | EPAF100-03            | AY666841                 |
| 4748              | Astraptles SENNOV | Eudaminae        | 99-SRNP-2445        | EPAF180-03            | AY666605                 |
| 4749              | Astraptles SENNOV | Eudaminae        | 99-SRNP-401         | EPAF188-03            | AY666811                 |
| 4750              | Astraptles SENNOV | Eudaminae        | 96-SRNP-6857        | EPAF095-03            | AY666829                 |
| 4751              | Astraptles SENNOV | Eudaminae        | 95-SRNP-6898        | EPAF078-03            | AY666851                 |
| 4752              | Astraptles SENNOV | Eudaminae        | 92-SRNP-4398        | EPAF425-03            | AY666714                 |
| 4753              | Astraptles SENNOV | Eudaminae        | 95-SRNP-6899        | EPAF394-03            | AY666762                 |
| 4754              | Astraptles SENNOV | Eudaminae        | 04-SRNP-47266       | MHAHH387-06           | GU155104                 |
| 4755              | Astraptles SENNOV | Eudaminae        | 98-SRNP-3453        | EPAF436-03            | AY666703                 |
| 4756              | Astraptles SENNOV | Eudaminae        | 91-SRNP-3045        | EPAF016-03            | AY666929                 |
| 4757              | Astraptles SENNOV | Eudaminae        | 93-SRNP-3603.1      | EPAF040-03            | AY666906                 |
| 4758              | Astraptles SENNOV | Eudaminae        | 06-SRNP-59595       | MHAHK251-07           | JF760386                 |
| 4759              | Astraptles SENNOV | Eudaminae        | 06-SRNP-47181       | MHAHK270-07           | JF760387                 |

| <b>Tree Order</b> | <b>Species</b>        | <b>Subfamily</b> | <b>ACG Sampleid</b> | <b>BOLD Processid</b> | <b>Genbank Accession</b> |
|-------------------|-----------------------|------------------|---------------------|-----------------------|--------------------------|
| 4760              | Astraptles SENNOV     | Eudaminae        | 07-SRNP-30435       | MHAHL288-07           | JF761620                 |
| 4761              | Astraptles SENNOV     | Eudaminae        | 08-SRNP-55549       | MHMWX152-09           | JF753695                 |
| 4762              | Astraptles INGCUPnumt | Eudaminae        | 02-SRNP-13284       | EPAF270-03            | AY667044                 |
| 4763              | Astraptles SENNOVnumt | Eudaminae        | 06-SRNP-23360       | MHMXXK344-07          | JF761627                 |
| 4764              | Astraptles YESENNumt  | Eudaminae        | 06-SRNP-46388       | MHAHJ625-07           | JF752466                 |
| 4765              | Astraptles YESENNumt  | Eudaminae        | 06-SRNP-33139       | MHAHI510-06           | GU155826                 |
| 4766              | Astraptles SENNOVnumt | Eudaminae        | 04-SRNP-47236       | MHAHH396-06           | GU155107                 |
| 4767              | Astraptles SENNOVnumt | Eudaminae        | 03-SRNP-3010        | MHAHH170-06           | GU155106                 |
| 4768              | Astraptles YESENNumt  | Eudaminae        | 00-SRNP-11386       | EPAF214-03            | AY666968                 |
| 4769              | Astraptles SENNOVnumt | Eudaminae        | 94-SRNP-6452        | EPAF058-03            | AY666889                 |
| 4770              | Astraptles SENNOVnumt | Eudaminae        | 93-SRNP-2680        | EPAF031-03            | AY666943                 |
| 4771              | Astraptles YESENNumt  | Eudaminae        | 05-SRNP-1089        | MHAHG398-06           | GU151202                 |
| 4772              | Astraptles YESENNumt  | Eudaminae        | 06-SRNP-46389       | MHAHJ940-07           | JF752467                 |
| 4773              | Astraptles YESENNumt  | Eudaminae        | 07-SRNP-24037       | MHMXT038-08           | JF761667                 |
| 4774              | Astraptles CELT       | Eudaminae        | 02-SRNP-31493       | EPAF308-03            | AY667032                 |
| 4775              | Astraptles CELT       | Eudaminae        | 02-SRNP-31136       | EPAF313-03            | AY667034                 |
| 4776              | Astraptles CELT       | Eudaminae        | 06-SRNP-48008       | MHAHK231-07           | JF760311                 |
| 4777              | Astraptles CELT       | Eudaminae        | 06-SRNP-47989       | MHAHK252-07           | JF760312                 |
| 4778              | Astraptles CELT       | Eudaminae        | 07-SRNP-45471       | MHMXXO846-08          | JF761486                 |
| 4779              | Astraptles CELT       | Eudaminae        | 07-SRNP-1959        | MHAHL269-07           | JF761472                 |
| 4780              | Astraptles CELT       | Eudaminae        | 02-SRNP-29799       | EPAF305-03            | AY667037                 |
| 4781              | Astraptles CELT       | Eudaminae        | 06-SRNP-3010        | MHAHH483-06           | GU154925                 |
| 4782              | Astraptles CELT       | Eudaminae        | 05-SRNP-20730       | MHAHG474-06           | GU151100                 |
| 4783              | Astraptles CELT       | Eudaminae        | 05-SRNP-1765        | MHAHG401-06           | GU151092                 |
| 4784              | Astraptles CELT       | Eudaminae        | 06-SRNP-3231        | MHAHG459-06           | GU151096                 |
| 4785              | Astraptles CELT       | Eudaminae        | 05-SRNP-20729       | MHAHG476-06           | GU151097                 |
| 4786              | Astraptles CELT       | Eudaminae        | 06-SRNP-46989       | MHAHJ666-07           | JF752385                 |
| 4787              | Astraptles CELT       | Eudaminae        | 07-SRNP-23567       | MHMXR732-08           | JF761478                 |
| 4788              | Astraptles CELT       | Eudaminae        | 07-SRNP-23826       | MHMXR735-08           | JF761476                 |
| 4789              | Astraptles CELT       | Eudaminae        | 97-SRNP-9604        | EPAF150-03            | AY666721                 |
| 4790              | Astraptles CELT       | Eudaminae        | 04-SRNP-48372       | MHAHH363-06           | GU154922                 |
| 4791              | Astraptles CELT       | Eudaminae        | 06-SRNP-45462       | MHAHI019-06           | GU155775                 |
| 4792              | Astraptles CELT       | Eudaminae        | 06-SRNP-4757        | MHAHI005-06           | GU155776                 |
| 4793              | Astraptles CELT       | Eudaminae        | 05-SRNP-754         | MHAHG417-06           | GU151094                 |
| 4794              | Astraptles CELT       | Eudaminae        | 04-SRNP-46734       | MHAHH232-06           | GU154919                 |
| 4795              | Astraptles CELT       | Eudaminae        | 02-SRNP-31741       | EPAF323-03            | AY667041                 |
| 4796              | Astraptles CELT       | Eudaminae        | 02-SRNP-29082       | EPAF284-03            | AY666839                 |
| 4797              | Astraptles CELT       | Eudaminae        | 04-SRNP-46737       | MHAHH390-06           | GU154924                 |
| 4798              | Astraptles CELT       | Eudaminae        | 04-SRNP-46063       | MHAHH259-06           | GU154921                 |
| 4799              | Astraptles CELT       | Eudaminae        | 07-SRNP-1969        | MHAHL279-07           | JF761475                 |
| 4800              | Astraptles CELT       | Eudaminae        | 94-SRNP-9389        | EPAF061-03            | AY666879                 |
| 4801              | Astraptles CELT       | Eudaminae        | 99-SRNP-5312        | EPAF185-03            | AY666630                 |
| 4802              | Astraptles CELT       | Eudaminae        | 02-SRNP-33197       | EPAF348-03            | AY666969                 |
| 4803              | Astraptles CELT       | Eudaminae        | 01-SRNP-1413        | EPAF236-03            | AY666689                 |
| 4804              | Astraptles CELT       | Eudaminae        | 02-SRNP-31745       | EPAF330-03            | AY666993                 |
| 4805              | Astraptles CELT       | Eudaminae        | 02-SRNP-33016       | EPAF332-03            | AY666988                 |
| 4806              | Astraptles CELT       | Eudaminae        | 02-SRNP-29083       | EPAF290-03            | AY666818                 |
| 4807              | Astraptles CELT       | Eudaminae        | 02-SRNP-31738       | EPAF321-03            | AY667012                 |
| 4808              | Astraptles CELT       | Eudaminae        | 02-SRNP-29080       | EPAF473-03            | AY666635                 |
| 4809              | Astraptles CELT       | Eudaminae        | 02-SRNP-29798       | EPAF419-03            | AY666727                 |
| 4810              | Astraptles CELT       | Eudaminae        | 96-SRNP-227         | EPAF091-03            | AY666835                 |
| 4811              | Astraptles CELT       | Eudaminae        | 02-SRNP-30241       | EPAF300-03            | AY667035                 |
| 4812              | Astraptles CELT       | Eudaminae        | 02-SRNP-33002       | EPAF356-03            | AY667040                 |
| 4813              | Astraptles CELT       | Eudaminae        | 02-SRNP-29054       | EPAF288-03            | AY667049                 |
| 4814              | Astraptles CELT       | Eudaminae        | 02-SRNP-31739       | EPAF324-03            | AY667009                 |
| 4815              | Astraptles CELT       | Eudaminae        | 06-SRNP-3011        | MHAHH488-06           | GU154926                 |

| <b>Tree Order</b> | <b>Species</b>  | <b>Subfamily</b> | <b>ACG Sampleid</b> | <b>BOLD Processid</b> | <b>Genbank Accession</b> |
|-------------------|-----------------|------------------|---------------------|-----------------------|--------------------------|
| 4816              | Astraptus CELT  | Eudaminae        | 04-SRNP-46459       | MHAHH257-06           | GU154920                 |
| 4817              | Astraptus CELT  | Eudaminae        | 05-SRNP-20279       | MHAHG482-06           | GU151101                 |
| 4818              | Astraptus CELT  | Eudaminae        | 05-SRNP-20731       | MHAHG475-06           | GU151099                 |
| 4819              | Astraptus CELT  | Eudaminae        | 05-SRNP-6757        | MHAHG472-06           | GU151098                 |
| 4820              | Astraptus CELT  | Eudaminae        | 05-SRNP-1608        | MHAHG412-06           | GU151093                 |
| 4821              | Astraptus CELT  | Eudaminae        | 05-SRNP-45088       | MHAHG395-06           | GU151091                 |
| 4822              | Astraptus CELT  | Eudaminae        | 02-SRNP-31377       | EPAF317-03            | AY667003                 |
| 4823              | Astraptus CELT  | Eudaminae        | 05-SRNP-24514       | MHAHG479-06           | GU151095                 |
| 4824              | Astraptus CELT  | Eudaminae        | 04-SRNP-46431       | MHAHH376-06           | GU154923                 |
| 4825              | Astraptus CELT  | Eudaminae        | 06-SRNP-4630        | MHAHI009-06           | GU155777                 |
| 4826              | Astraptus CELT  | Eudaminae        | 06-SRNP-4631        | MHAHI013-06           | GU155778                 |
| 4827              | Astraptus CELT  | Eudaminae        | 06-SRNP-9528        | MHAHJ802-07           | JF752386                 |
| 4828              | Astraptus CELT  | Eudaminae        | 06-SRNP-47745       | MHAHJ925-07           | JF752387                 |
| 4829              | Astraptus CELT  | Eudaminae        | 07-SRNP-1958        | MHAHL276-07           | JF761473                 |
| 4830              | Astraptus CELT  | Eudaminae        | 07-SRNP-1967        | MHAHL277-07           | JF761474                 |
| 4831              | Astraptus CELT  | Eudaminae        | 07-SRNP-45467       | MHM XO837-08          | JF761487                 |
| 4832              | Astraptus CELT  | Eudaminae        | 07-SRNP-3042        | MHM XO850-08          | JF761485                 |
| 4833              | Astraptus CELT  | Eudaminae        | 07-SRNP-45470       | MHM XO853-08          | JF761484                 |
| 4834              | Astraptus CELT  | Eudaminae        | 07-SRNP-45603       | MHM XO855-08          | JF761483                 |
| 4835              | Astraptus CELT  | Eudaminae        | 07-SRNP-45602       | MHM XO858-08          | JF761482                 |
| 4836              | Astraptus CELT  | Eudaminae        | 07-SRNP-45608       | MHM XO859-08          | JF761481                 |
| 4837              | Astraptus CELT  | Eudaminae        | 07-SRNP-45607       | MHM XO861-08          | JF761480                 |
| 4838              | Astraptus CELT  | Eudaminae        | 07-SRNP-45600       | MHM XO868-08          | JF761479                 |
| 4839              | Astraptus CELT  | Eudaminae        | 07-SRNP-22224       | MHM XR733-08          | JF761477                 |
| 4840              | Astraptus CELT  | Eudaminae        | 08-SRNP-4065        | MHM XW176-09          | JF753665                 |
| 4841              | Astraptus CELT  | Eudaminae        | 09-SRNP-65963       | MHMYH119-10           | HM887271                 |
| 4842              | Astraptus TRIGO | Eudaminae        | 06-SRNP-55033       | MHAHG173-06           | GU151168                 |
| 4843              | Astraptus TRIGO | Eudaminae        | 07-SRNP-45479       | MHM XO863-08          | JF761638                 |
| 4844              | Astraptus TRIGO | Eudaminae        | 07-SRNP-45480       | MHM XO869-08          | JF761637                 |
| 4845              | Astraptus TRIGO | Eudaminae        | 06-SRNP-59720       | MHAHK247-07           | JF760392                 |
| 4846              | Astraptus TRIGO | Eudaminae        | 07-SRNP-45478       | MHM XO845-08          | JF761639                 |
| 4847              | Astraptus TRIGO | Eudaminae        | 07-SRNP-45482       | MHM XR725-08          | JF761635                 |
| 4848              | Astraptus TRIGO | Eudaminae        | 02-SRNP-31761       | EPAF335-03            | AY666981                 |
| 4849              | Astraptus TRIGO | Eudaminae        | 91-SRNP-2346        | EPAF416-03            | AY666716                 |
| 4850              | Astraptus TRIGO | Eudaminae        | 06-SRNP-59719       | MHAHK232-07           | JF760390                 |
| 4851              | Astraptus TRIGO | Eudaminae        | 97-SRNP-5364        | EPAF147-03            | AY666730                 |
| 4852              | Astraptus TRIGO | Eudaminae        | 97-SRNP-5500        | EPAF144-03            | AY666725                 |
| 4853              | Astraptus TRIGO | Eudaminae        | 07-SRNP-55072       | MHAHK246-07           | JF760391                 |
| 4854              | Astraptus TRIGO | Eudaminae        | 02-SRNP-30290       | EPAF302-03            | AY667030                 |
| 4855              | Astraptus TRIGO | Eudaminae        | 02-SRNP-30291       | EPAF303-03            | AY667029                 |
| 4856              | Astraptus TRIGO | Eudaminae        | 92-SRNP-4386        | EPAF022-03            | AY666930                 |
| 4857              | Astraptus TRIGO | Eudaminae        | 02-SRNP-31535       | EPAF357-03            | AY666951                 |
| 4858              | Astraptus TRIGO | Eudaminae        | 03-SRNP-17651       | MHAHH308-06           | GU155109                 |
| 4859              | Astraptus TRIGO | Eudaminae        | 05-SRNP-45112       | MHAHG424-06           | GU151173                 |
| 4860              | Astraptus TRIGO | Eudaminae        | 05-SRNP-45125       | MHAHG423-06           | GU151175                 |
| 4861              | Astraptus TRIGO | Eudaminae        | 05-SRNP-45076       | MHAHG418-06           | GU151172                 |
| 4862              | Astraptus TRIGO | Eudaminae        | 05-SRNP-45073       | MHAHG409-06           | GU151171                 |
| 4863              | Astraptus TRIGO | Eudaminae        | 01-SRNP-9825        | EPAF239-03            | AY666687                 |
| 4864              | Astraptus TRIGO | Eudaminae        | 02-SRNP-29103       | EPAF278-03            | AY666840                 |
| 4865              | Astraptus TRIGO | Eudaminae        | 02-SRNP-31684       | EPAF315-03            | AY667016                 |
| 4866              | Astraptus TRIGO | Eudaminae        | 02-SRNP-33258       | EPAF349-03            | AY666957                 |
| 4867              | Astraptus TRIGO | Eudaminae        | 02-SRNP-31538       | EPAF319-03            | AY667005                 |
| 4868              | Astraptus TRIGO | Eudaminae        | 02-SRNP-31536       | EPAF306-03            | AY667050                 |
| 4869              | Astraptus TRIGO | Eudaminae        | 02-SRNP-33259       | EPAF329-03            | AY666995                 |
| 4870              | Astraptus TRIGO | Eudaminae        | 02-SRNP-31537       | EPAF322-03            | AY667011                 |
| 4871              | Astraptus TRIGO | Eudaminae        | 02-SRNP-31762       | EPAF341-03            | AY666976                 |

| <b>Tree Order</b> | <b>Species</b>  | <b>Subfamily</b> | <b>ACG Sampleid</b> | <b>BOLD Processid</b> | <b>Genbank Accession</b> |
|-------------------|-----------------|------------------|---------------------|-----------------------|--------------------------|
| 4872              | Astraptes TRIGO | Eudaminae        | 02-SRNP-31756       | EPAF339-03            | AY666973                 |
| 4873              | Astraptes TRIGO | Eudaminae        | 02-SRNP-33261       | EPAF334-03            | AY666983                 |
| 4874              | Astraptes TRIGO | Eudaminae        | 98-SRNP-5868        | EPAF172-03            | AY666639                 |
| 4875              | Astraptes TRIGO | Eudaminae        | 02-SRNP-31748       | EPAF340-03            | AY666972                 |
| 4876              | Astraptes TRIGO | Eudaminae        | 02-SRNP-33260       | EPAF342-03            | AY666964                 |
| 4877              | Astraptes TRIGO | Eudaminae        | 02-SRNP-31539       | EPAF311-03            | AY667024                 |
| 4878              | Astraptes TRIGO | Eudaminae        | 02-SRNP-31755       | EPAF350-03            | AY666961                 |
| 4879              | Astraptes TRIGO | Eudaminae        | 97-SRNP-5215        | EPAF143-03            | AY666756                 |
| 4880              | Astraptes TRIGO | Eudaminae        | 97-SRNP-5499        | EPAF149-03            | AY666708                 |
| 4881              | Astraptes TRIGO | Eudaminae        | 02-SRNP-31620       | EPAF336-03            | AY666994                 |
| 4882              | Astraptes TRIGO | Eudaminae        | 92-SRNP-5726        | EPAF025-03            | AY666907                 |
| 4883              | Astraptes TRIGO | Eudaminae        | 02-SRNP-31621       | EPAF351-03            | AY666959                 |
| 4884              | Astraptes TRIGO | Eudaminae        | 91-SRNP-2576        | EPAF014-03            | AY666924                 |
| 4885              | Astraptes TRIGO | Eudaminae        | 02-SRNP-31784       | EPAF333-03            | AY666979                 |
| 4886              | Astraptes TRIGO | Eudaminae        | 02-SRNP-31782       | EPAF338-03            | AY667008                 |
| 4887              | Astraptes TRIGO | Eudaminae        | 91-SRNP-2694        | EPAF469-03            | AY666629                 |
| 4888              | Astraptes TRIGO | Eudaminae        | 02-SRNP-31817       | EPAF331-03            | AY666992                 |
| 4889              | Astraptes TRIGO | Eudaminae        | 02-SRNP-33453       | EPAF355-03            | AY666984                 |
| 4890              | Astraptes TRIGO | Eudaminae        | 97-SRNP-4485        | EPAF129-03            | AY666794                 |
| 4891              | Astraptes TRIGO | Eudaminae        | 91-SRNP-2631        | EPAF482-03            | AY666650                 |
| 4892              | Astraptes TRIGO | Eudaminae        | 92-SRNP-4379        | EPAF019-03            | AY666923                 |
| 4893              | Astraptes TRIGO | Eudaminae        | 97-SRNP-5939        | EPAF155-03            | AY666760                 |
| 4894              | Astraptes TRIGO | Eudaminae        | 93-SRNP-7152        | EPAF049-03            | AY666897                 |
| 4895              | Astraptes TRIGO | Eudaminae        | 93-SRNP-8663        | EPAF051-03            | AY666887                 |
| 4896              | Astraptes TRIGO | Eudaminae        | 97-SRNP-5453        | EPAF146-03            | AY666729                 |
| 4897              | Astraptes TRIGO | Eudaminae        | 02-SRNP-31820       | EPAF343-03            | AY666978                 |
| 4898              | Astraptes TRIGO | Eudaminae        | 02-SRNP-31786       | EPAF347-03            | AY666970                 |
| 4899              | Astraptes TRIGO | Eudaminae        | 92-SRNP-4372        | EPAF020-03            | AY666918                 |
| 4900              | Astraptes TRIGO | Eudaminae        | 97-SRNP-5173        | EPAF140-03            | AY666733                 |
| 4901              | Astraptes TRIGO | Eudaminae        | 87-SRNP-1357        | EPAF004-03            | AY666932                 |
| 4902              | Astraptes TRIGO | Eudaminae        | 91-SRNP-2522        | EPAF011-03            | AY666944                 |
| 4903              | Astraptes TRIGO | Eudaminae        | 01-SRNP-9111        | EPAF230-03            | AY666720                 |
| 4904              | Astraptes TRIGO | Eudaminae        | 96-SRNP-9543        | EPAF105-03            | AY666816                 |
| 4905              | Astraptes TRIGO | Eudaminae        | 06-SRNP-55035       | MHAHG177-06           | GU151169                 |
| 4906              | Astraptes TRIGO | Eudaminae        | 05-SRNP-45110       | MHAHG408-06           | GU151170                 |
| 4907              | Astraptes TRIGO | Eudaminae        | 05-SRNP-45111       | MHAHG419-06           | GU151174                 |
| 4908              | Astraptes TRIGO | Eudaminae        | 05-SRNP-65453       | MHAHG469-06           | GU151176                 |
| 4909              | Astraptes TRIGO | Eudaminae        | 06-SRNP-58075       | MHAHJ590-07           | JF752440                 |
| 4910              | Astraptes TRIGO | Eudaminae        | 06-SRNP-58074       | MHAHJ591-07           | JF752441                 |
| 4911              | Astraptes TRIGO | Eudaminae        | 06-SRNP-58073       | MHAHJ663-07           | JF752442                 |
| 4912              | Astraptes TRIGO | Eudaminae        | 06-SRNP-59785       | MHAHK248-07           | JF760393                 |
| 4913              | Astraptes TRIGO | Eudaminae        | 07-SRNP-45559       | MHMXR723-08           | JF761636                 |
| 4914              | Astraptes TRIGO | Eudaminae        | 08-SRNP-2317        | MHMXW153-09           | JF753696                 |
| 4915              | Urbanus evona   | Eudaminae        | 93-SRNP-3406        | CSRII323-04           | DQ293761                 |
| 4916              | Urbanus evona   | Eudaminae        | 90-SRNP-1654.1      | CSRII317-04           | DQ293760                 |
| 4917              | Urbanus evona   | Eudaminae        | 04-SRNP-45778       | MHAHC045-05           | DQ293763                 |
| 4918              | Urbanus evona   | Eudaminae        | 05-SRNP-66411       | MHAHG589-06           | GU151870                 |
| 4919              | Urbanus evona   | Eudaminae        | 05-SRNP-59072       | MHAHF924-06           | GU151015                 |
| 4920              | Urbanus evona   | Eudaminae        | 05-SRNP-57365       | MHAHF917-06           | GU151014                 |
| 4921              | Urbanus evona   | Eudaminae        | 05-SRNP-57364       | MHAHF909-06           | GU151013                 |
| 4922              | Urbanus evona   | Eudaminae        | 05-SRNP-58937       | MHAHF908-06           | GU151012                 |
| 4923              | Urbanus evona   | Eudaminae        | 04-SRNP-15286       | MHAHC408-05           | DQ293768                 |
| 4924              | Urbanus evona   | Eudaminae        | 04-SRNP-14470       | MHAHC278-05           | DQ293766                 |
| 4925              | Urbanus evona   | Eudaminae        | 02-SRNP-32829       | MHAHC248-05           | DQ293765                 |
| 4926              | Urbanus evona   | Eudaminae        | 02-SRNP-32830       | MHAHC247-05           | DQ293764                 |
| 4927              | Urbanus evona   | Eudaminae        | 01-SRNP-14067       | MHAHC341-05           | DQ293767                 |



| <b>Tree Order</b> | <b>Species</b> | <b>Subfamily</b> | <b>ACG Sampleid</b> | <b>BOLD Processid</b> | <b>Genbank Accession</b> |
|-------------------|----------------|------------------|---------------------|-----------------------|--------------------------|
| 4928              | Urbanus evona  | Eudaminae        | 04-SRNP-45787       | MHAHC037-05           | DQ293762                 |
| 4929              | Urbanus evona  | Eudaminae        | 97-SRNP-4685        | MHAHI938-07           | GU156473                 |
| 4930              | Urbanus evona  | Eudaminae        | 02-SRNP-32828       | MHAHI968-07           | GU156474                 |
| 4931              | Urbanus evona  | Eudaminae        | 06-SRNP-57688       | MHAHJ632-07           | JF753241                 |
| 4932              | Urbanus evona  | Eudaminae        | 07-SRNP-57988       | MHMXO834-08           | JF750917                 |
| 4933              | Urbanus esta   | Eudaminae        | 93-SRNP-5934        | CSRII327-04           | DQ293751                 |
| 4934              | Urbanus esta   | Eudaminae        | 97-SRNP-2009        | MHAHD451-05           | GU161996                 |
| 4935              | Urbanus esta   | Eudaminae        | 97-SRNP-2006        | MHAHD450-05           | GU161997                 |
| 4936              | Urbanus esta   | Eudaminae        | 04-SRNP-56961       | MHAHC413-05           | DQ293758                 |
| 4937              | Urbanus esta   | Eudaminae        | 07-SRNP-45289       | MHMXO820-08           | JF750916                 |
| 4938              | Urbanus esta   | Eudaminae        | 06-SRNP-40068       | MHAHG334-06           | GU151848                 |
| 4939              | Urbanus esta   | Eudaminae        | 06-SRNP-1725        | MHAHG541-06           | GU151849                 |
| 4940              | Urbanus esta   | Eudaminae        | 93-SRNP-1169        | CSRII322-04           | DQ293750                 |
| 4941              | Urbanus esta   | Eudaminae        | 01-SRNP-3184        | MHAHD448-05           | GU161994                 |
| 4942              | Urbanus esta   | Eudaminae        | 06-SRNP-19547       | MHAHK072-07           | JF761271                 |
| 4943              | Urbanus esta   | Eudaminae        | 00-SRNP-1522        | MHAHD465-05           | GU162007                 |
| 4944              | Urbanus esta   | Eudaminae        | 06-SRNP-31215       | MHAHG566-06           | GU151863                 |
| 4945              | Urbanus esta   | Eudaminae        | 05-SRNP-416         | MHAHF913-06           | GU151008                 |
| 4946              | Urbanus esta   | Eudaminae        | 07-SRNP-65020       | MHAHL461-07           | JF763351                 |
| 4947              | Urbanus esta   | Eudaminae        | 06-SRNP-57925       | MHAHJ605-07           | JF753240                 |
| 4948              | Urbanus esta   | Eudaminae        | 06-SRNP-2685        | MHAHH546-06           | GU155700                 |
| 4949              | Urbanus esta   | Eudaminae        | 01-SRNP-17208       | MHAHD442-05           | GU162005                 |
| 4950              | Urbanus esta   | Eudaminae        | 05-SRNP-65398       | MHAHG585-06           | GU151842                 |
| 4951              | Urbanus esta   | Eudaminae        | 07-SRNP-20182       | MHMXX316-07           | JF763354                 |
| 4952              | Urbanus esta   | Eudaminae        | 06-SRNP-31006       | MHAHG557-06           | GU151861                 |
| 4953              | Urbanus esta   | Eudaminae        | 05-SRNP-33820       | MHAHG580-06           | GU151843                 |
| 4954              | Urbanus esta   | Eudaminae        | 05-SRNP-58910       | MHAHF915-06           | GU151009                 |
| 4955              | Urbanus esta   | Eudaminae        | 06-SRNP-31058       | MHAHG553-06           | GU151856                 |
| 4956              | Urbanus esta   | Eudaminae        | 05-SRNP-59305       | MHAHF910-06           | GU151005                 |
| 4957              | Urbanus esta   | Eudaminae        | 01-SRNP-473         | MHAHD468-05           | GU162010                 |
| 4958              | Urbanus esta   | Eudaminae        | 02-SRNP-1933        | MHAHD461-05           | GU161995                 |
| 4959              | Urbanus esta   | Eudaminae        | 02-SRNP-1930        | MHAHD460-05           | GU162003                 |
| 4960              | Urbanus esta   | Eudaminae        | 00-SRNP-1520        | MHAHD459-05           | GU162006                 |
| 4961              | Urbanus esta   | Eudaminae        | 00-SRNP-1519        | MHAHD458-05           | GU162004                 |
| 4962              | Urbanus esta   | Eudaminae        | 01-SRNP-17209       | MHAHD441-05           | GU161989                 |
| 4963              | Urbanus esta   | Eudaminae        | 04-SRNP-15166       | MHAHC400-05           | DQ293756                 |
| 4964              | Urbanus esta   | Eudaminae        | 04-SRNP-15168       | MHAHC393-05           | DQ293755                 |
| 4965              | Urbanus esta   | Eudaminae        | 02-SRNP-1932        | MHAHC246-05           | DQ293753                 |
| 4966              | Urbanus esta   | Eudaminae        | 02-SRNP-32029       | MHAHD397-05           | GU161998                 |
| 4967              | Urbanus esta   | Eudaminae        | 06-SRNP-19546       | MHAHI463-06           | GU156471                 |
| 4968              | Urbanus esta   | Eudaminae        | 07-SRNP-31014       | MHAHL445-07           | JF763348                 |
| 4969              | Urbanus esta   | Eudaminae        | 06-SRNP-30965       | MHAHG551-06           | GU151854                 |
| 4970              | Urbanus esta   | Eudaminae        | 06-SRNP-31059       | MHAHG552-06           | GU151857                 |
| 4971              | Urbanus esta   | Eudaminae        | 06-SRNP-1984        | MHAHG554-06           | GU151855                 |
| 4972              | Urbanus esta   | Eudaminae        | 06-SRNP-1745        | MHAHG556-06           | GU151858                 |
| 4973              | Urbanus esta   | Eudaminae        | 06-SRNP-30964       | MHAHG559-06           | GU151862                 |
| 4974              | Urbanus esta   | Eudaminae        | 06-SRNP-30990       | MHAHG560-06           | GU151860                 |
| 4975              | Urbanus esta   | Eudaminae        | 06-SRNP-30961       | MHAHG563-06           | GU151864                 |
| 4976              | Urbanus esta   | Eudaminae        | 06-SRNP-31004       | MHAHG564-06           | GU151866                 |
| 4977              | Urbanus esta   | Eudaminae        | 06-SRNP-1743        | MHAHG565-06           | GU151865                 |
| 4978              | Urbanus esta   | Eudaminae        | 06-SRNP-1985        | MHAHG567-06           | GU151859                 |
| 4979              | Urbanus esta   | Eudaminae        | 05-SRNP-59539       | MHAHF923-06           | GU151010                 |
| 4980              | Urbanus esta   | Eudaminae        | 05-SRNP-59065       | MHAHF926-06           | GU151007                 |
| 4981              | Urbanus esta   | Eudaminae        | 06-SRNP-1798        | MHAHG568-06           | GU151851                 |
| 4982              | Urbanus esta   | Eudaminae        | 06-SRNP-1747        | MHAHG570-06           | GU151867                 |
| 4983              | Urbanus esta   | Eudaminae        | 06-SRNP-1746        | MHAHG571-06           | GU151869                 |

| <b>Tree Order</b> | <b>Species</b>     | <b>Subfamily</b> | <b>ACG Sampleid</b> | <b>BOLD Processid</b> | <b>Genbank Accession</b> |
|-------------------|--------------------|------------------|---------------------|-----------------------|--------------------------|
| 4984              | Urbanus esta       | Eudaminae        | 06-SRNP-1982        | MHAHG572-06           | GU151868                 |
| 4985              | Urbanus esta       | Eudaminae        | 06-SRNP-2690        | MHAHG601-06           | GU151844                 |
| 4986              | Urbanus esta       | Eudaminae        | 06-SRNP-4071        | MHAHI032-06           | GU156472                 |
| 4987              | Urbanus esta       | Eudaminae        | 07-SRNP-56430       | MHMXK295-07           | JF750915                 |
| 4988              | Urbanus esta       | Eudaminae        | 07-SRNP-1190        | MHMXK318-07           | JF763353                 |
| 4989              | Urbanus esta       | Eudaminae        | 07-SRNP-65022       | MHAHL455-07           | JF763349                 |
| 4990              | Urbanus esta       | Eudaminae        | 07-SRNP-65019       | MHAHL456-07           | JF763350                 |
| 4991              | Urbanus esta       | Eudaminae        | 06-SRNP-1532        | MHAHG546-06           | GU151850                 |
| 4992              | Urbanus esta       | Eudaminae        | 06-SRNP-30959       | MHAHG550-06           | GU151853                 |
| 4993              | Urbanus esta       | Eudaminae        | 06-SRNP-30040       | MHAHG332-06           | GU151845                 |
| 4994              | Urbanus esta       | Eudaminae        | 06-SRNP-1983        | MHAHG545-06           | GU151852                 |
| 4995              | Urbanus esta       | Eudaminae        | 05-SRNP-417         | MHAHF912-06           | GU151006                 |
| 4996              | Urbanus esta       | Eudaminae        | 05-SRNP-41969       | MHAHF921-06           | GU151011                 |
| 4997              | Urbanus esta       | Eudaminae        | 02-SRNP-2902        | MHAHD469-05           | GU162011                 |
| 4998              | Urbanus esta       | Eudaminae        | 01-SRNP-1157        | MHAHD470-05           | GU162012                 |
| 4999              | Urbanus esta       | Eudaminae        | 00-SRNP-20821       | MHAHD462-05           | GU162008                 |
| 5000              | Urbanus esta       | Eudaminae        | 02-SRNP-1896        | MHAHD453-05           | GU162002                 |
| 5001              | Urbanus esta       | Eudaminae        | 02-SRNP-1436        | MHAHD452-05           | GU162001                 |
| 5002              | Urbanus esta       | Eudaminae        | 02-SRNP-2373        | MHAHD447-05           | GU161992                 |
| 5003              | Urbanus esta       | Eudaminae        | 02-SRNP-1435        | MHAHD446-05           | GU161991                 |
| 5004              | Urbanus esta       | Eudaminae        | 02-SRNP-546         | MHAHD445-05           | GU161990                 |
| 5005              | Urbanus esta       | Eudaminae        | 01-SRNP-16946       | MHAHD398-05           | GU162000                 |
| 5006              | Urbanus esta       | Eudaminae        | 02-SRNP-32024       | MHAHD396-05           | GU161999                 |
| 5007              | Urbanus esta       | Eudaminae        | 04-SRNP-55662       | MHAHC701-05           | DQ293759                 |
| 5008              | Urbanus esta       | Eudaminae        | 05-SRNP-30144       | MHAHC412-05           | DQ293757                 |
| 5009              | Urbanus esta       | Eudaminae        | 04-SRNP-30928       | MHAHC079-05           | DQ293752                 |
| 5010              | Urbanus esta       | Eudaminae        | 02-SRNP-2320        | MHAHC252-05           | DQ293754                 |
| 5011              | Urbanus esta       | Eudaminae        | 02-SRNP-402         | MHAHD443-05           | GU162009                 |
| 5012              | Urbanus esta       | Eudaminae        | 02-SRNP-401         | MHAHD444-05           | GU161993                 |
| 5013              | Urbanus esta       | Eudaminae        | 06-SRNP-20646       | MHAHG333-06           | GU151846                 |
| 5014              | Urbanus esta       | Eudaminae        | 07-SRNP-58873       | MHMXR789-08           | JF763352                 |
| 5015              | Urbanus esmeraldus | Eudaminae        | 97-SRNP-9206        | MHAHI982-07           | GU156461                 |
| 5016              | Urbanus esmeraldus | Eudaminae        | 97-SRNP-9537        | MHAHI981-07           | GU156460                 |
| 5017              | Urbanus esmeraldus | Eudaminae        | 97-SRNP-9643        | MHAHI935-07           | GU156416                 |
| 5018              | Urbanus esmeraldus | Eudaminae        | 97-SRNP-9544        | MHAHI934-07           | GU156415                 |
| 5019              | Urbanus esmeraldus | Eudaminae        | 92-SRNP-4090        | CSRII321-04           | DQ293722                 |
| 5020              | Urbanus esmeraldus | Eudaminae        | 93-SRNP-6647.1      | CSRII329-04           | DQ293723                 |
| 5021              | Urbanus esmeraldus | Eudaminae        | 02-SRNP-28832       | MHAHC193-05           | DQ293728                 |
| 5022              | Urbanus esmeraldus | Eudaminae        | 02-SRNP-28843       | MHAHD455-05           | GU161985                 |
| 5023              | Urbanus esmeraldus | Eudaminae        | 99-SRNP-3218        | MHAHI951-07           | GU156431                 |
| 5024              | Urbanus esmeraldus | Eudaminae        | 02-SRNP-28844       | MHAHI965-07           | GU156445                 |
| 5025              | Urbanus esmeraldus | Eudaminae        | 06-SRNP-59207       | MHAHK067-07           | JF761270                 |
| 5026              | Urbanus esmeraldus | Eudaminae        | 97-SRNP-9775        | MHAHI918-07           | GU156399                 |
| 5027              | Urbanus esmeraldus | Eudaminae        | 06-SRNP-56793       | MHAHI031-06           | GU156397                 |
| 5028              | Urbanus esmeraldus | Eudaminae        | 97-SRNP-9209        | MHAHI933-07           | GU156414                 |
| 5029              | Urbanus esmeraldus | Eudaminae        | 97-SRNP-9213        | MHAHI926-07           | GU156407                 |
| 5030              | Urbanus esmeraldus | Eudaminae        | 97-SRNP-9207        | MHAHI936-07           | GU156417                 |
| 5031              | Urbanus esmeraldus | Eudaminae        | 97-SRNP-9532        | MHAHI939-07           | GU156419                 |
| 5032              | Urbanus esmeraldus | Eudaminae        | 02-SRNP-15771       | MHAHI977-07           | GU156456                 |
| 5033              | Urbanus esmeraldus | Eudaminae        | 01-SRNP-17432       | MHAHI980-07           | GU156459                 |
| 5034              | Urbanus esmeraldus | Eudaminae        | 01-SRNP-17161       | MHAHC289-05           | DQ293734                 |
| 5035              | Urbanus esmeraldus | Eudaminae        | 07-SRNP-20116       | MHMXK300-07           | JF763347                 |
| 5036              | Urbanus esmeraldus | Eudaminae        | 05-SRNP-56429       | MHAHF901-06           | GU151002                 |
| 5037              | Urbanus esmeraldus | Eudaminae        | 05-SRNP-56430       | MHAHF903-06           | GU150996                 |
| 5038              | Urbanus esmeraldus | Eudaminae        | 03-SRNP-1944        | MHAHI944-07           | GU156424                 |
| 5039              | Urbanus esmeraldus | Eudaminae        | 02-SRNP-17015       | MHAHI963-07           | GU156443                 |

| <b>Tree Order</b> | <b>Species</b>     | <b>Subfamily</b> | <b>ACG Sampleid</b> | <b>BOLD Processid</b> | <b>Genbank Accession</b> |
|-------------------|--------------------|------------------|---------------------|-----------------------|--------------------------|
| 5040              | Urbanus esmeraldus | Eudaminae        | 03-SRNP-20895       | MHAHI960-07           | GU156440                 |
| 5041              | Urbanus esmeraldus | Eudaminae        | 01-SRNP-17567       | MHAHI969-07           | GU156448                 |
| 5042              | Urbanus esmeraldus | Eudaminae        | 03-SRNP-17407       | MHAHI949-07           | GU156429                 |
| 5043              | Urbanus esmeraldus | Eudaminae        | 05-SRNP-32493       | MHAHG579-06           | GU151832                 |
| 5044              | Urbanus esmeraldus | Eudaminae        | 06-SRNP-31303       | MHAHG561-06           | GU151841                 |
| 5045              | Urbanus esmeraldus | Eudaminae        | 06-SRNP-31301       | MHAHG555-06           | GU151840                 |
| 5046              | Urbanus esmeraldus | Eudaminae        | 06-SRNP-31302       | MHAHG543-06           | GU151839                 |
| 5047              | Urbanus esmeraldus | Eudaminae        | 06-SRNP-30507       | MHAHG331-06           | GU151835                 |
| 5048              | Urbanus esmeraldus | Eudaminae        | 01-SRNP-17046       | MHAHI978-07           | GU156457                 |
| 5049              | Urbanus esmeraldus | Eudaminae        | 01-SRNP-17434       | MHAHI976-07           | GU156455                 |
| 5050              | Urbanus esmeraldus | Eudaminae        | 01-SRNP-17160       | MHAHI975-07           | GU156454                 |
| 5051              | Urbanus esmeraldus | Eudaminae        | 01-SRNP-17141       | MHAHI974-07           | GU156453                 |
| 5052              | Urbanus esmeraldus | Eudaminae        | 01-SRNP-17081       | MHAHI973-07           | GU156452                 |
| 5053              | Urbanus esmeraldus | Eudaminae        | 99-SRNP-3219        | MHAHI967-07           | GU156447                 |
| 5054              | Urbanus esmeraldus | Eudaminae        | 01-SRNP-17561       | MHAHI964-07           | GU156444                 |
| 5055              | Urbanus esmeraldus | Eudaminae        | 02-SRNP-32156       | MHAHI962-07           | GU156442                 |
| 5056              | Urbanus esmeraldus | Eudaminae        | 99-SRNP-7525        | MHAHI961-07           | GU156441                 |
| 5057              | Urbanus esmeraldus | Eudaminae        | 03-SRNP-30344       | MHAHI958-07           | GU156438                 |
| 5058              | Urbanus esmeraldus | Eudaminae        | 04-SRNP-22082       | MHAHI953-07           | GU156433                 |
| 5059              | Urbanus esmeraldus | Eudaminae        | 04-SRNP-22250       | MHAHI952-07           | GU156432                 |
| 5060              | Urbanus esmeraldus | Eudaminae        | 03-SRNP-17392       | MHAHI950-07           | GU156430                 |
| 5061              | Urbanus esmeraldus | Eudaminae        | 03-SRNP-17393       | MHAHI948-07           | GU156428                 |
| 5062              | Urbanus esmeraldus | Eudaminae        | 03-SRNP-17394       | MHAHI947-07           | GU156427                 |
| 5063              | Urbanus esmeraldus | Eudaminae        | 06-SRNP-33147       | MHAHI618-06           | GU156470                 |
| 5064              | Urbanus esmeraldus | Eudaminae        | 06-SRNP-45697       | MHAHI036-06           | GU156396                 |
| 5065              | Urbanus esmeraldus | Eudaminae        | 05-SRNP-34511       | MHAHG592-06           | GU151834                 |
| 5066              | Urbanus esmeraldus | Eudaminae        | 05-SRNP-32807       | MHAHG578-06           | GU151833                 |
| 5067              | Urbanus esmeraldus | Eudaminae        | 05-SRNP-32806       | MHAHG577-06           | GU151831                 |
| 5068              | Urbanus esmeraldus | Eudaminae        | 05-SRNP-34529       | MHAHG576-06           | GU151836                 |
| 5069              | Urbanus esmeraldus | Eudaminae        | 05-SRNP-32491       | MHAHG575-06           | GU151837                 |
| 5070              | Urbanus esmeraldus | Eudaminae        | 05-SRNP-59480       | MHAHF922-06           | GU151003                 |
| 5071              | Urbanus esmeraldus | Eudaminae        | 05-SRNP-46986       | MHAHF911-06           | GU151001                 |
| 5072              | Urbanus esmeraldus | Eudaminae        | 05-SRNP-45421       | MHAHF907-06           | GU150998                 |
| 5073              | Urbanus esmeraldus | Eudaminae        | 05-SRNP-46937       | MHAHF906-06           | GU150999                 |
| 5074              | Urbanus esmeraldus | Eudaminae        | 05-SRNP-59048       | MHAHF905-06           | GU150997                 |
| 5075              | Urbanus esmeraldus | Eudaminae        | 04-SRNP-26751       | MHAHF904-06           | GU151000                 |
| 5076              | Urbanus esmeraldus | Eudaminae        | 01-SRNP-17442       | MHAHD929-05           | GU161988                 |
| 5077              | Urbanus esmeraldus | Eudaminae        | 02-SRNP-29483       | MHAHD454-05           | GU161986                 |
| 5078              | Urbanus esmeraldus | Eudaminae        | 97-SRNP-4935        | MHAHD401-05           | GU161987                 |
| 5079              | Urbanus esmeraldus | Eudaminae        | 04-SRNP-15171       | MHAHC398-05           | DQ293749                 |
| 5080              | Urbanus esmeraldus | Eudaminae        | 04-SRNP-16070       | MHAHC386-05           | DQ293748                 |
| 5081              | Urbanus esmeraldus | Eudaminae        | 04-SRNP-13825       | MHAHC305-05           | DQ293737                 |
| 5082              | Urbanus esmeraldus | Eudaminae        | 04-SRNP-14316       | MHAHC302-05           | DQ293736                 |
| 5083              | Urbanus esmeraldus | Eudaminae        | 04-SRNP-48164       | MHAHC296-05           | DQ293735                 |
| 5084              | Urbanus esmeraldus | Eudaminae        | 04-SRNP-13677       | MHAHC203-05           | DQ293730                 |
| 5085              | Urbanus esmeraldus | Eudaminae        | 04-SRNP-13824       | MHAHC308-05           | DQ293738                 |
| 5086              | Urbanus esmeraldus | Eudaminae        | 01-SRNP-17077       | MHAHC356-05           | DQ293747                 |
| 5087              | Urbanus esmeraldus | Eudaminae        | 01-SRNP-17185       | MHAHC355-05           | DQ293746                 |
| 5088              | Urbanus esmeraldus | Eudaminae        | 01-SRNP-17421       | MHAHC354-05           | DQ293745                 |
| 5089              | Urbanus esmeraldus | Eudaminae        | 01-SRNP-17080.01    | MHAHC353-05           | DQ293744                 |
| 5090              | Urbanus esmeraldus | Eudaminae        | 01-SRNP-17163       | MHAHC352-05           | DQ293743                 |
| 5091              | Urbanus esmeraldus | Eudaminae        | 01-SRNP-17433       | MHAHC351-05           | DQ293742                 |
| 5092              | Urbanus esmeraldus | Eudaminae        | 01-SRNP-11002       | MHAHC327-05           | DQ293740                 |
| 5093              | Urbanus esmeraldus | Eudaminae        | 02-SRNP-29162       | MHAHC201-05           | DQ293729                 |
| 5094              | Urbanus esmeraldus | Eudaminae        | 01-SRNP-17443       | MHAHC318-05           | DQ293724                 |
| 5095              | Urbanus esmeraldus | Eudaminae        | 02-SRNP-5542        | MHAHC221-05           | DQ293732                 |

| <b>Tree Order</b> | <b>Species</b>     | <b>Subfamily</b> | <b>ACG Sampleid</b> | <b>BOLD Processid</b> | <b>Genbank Accession</b> |
|-------------------|--------------------|------------------|---------------------|-----------------------|--------------------------|
| 5096              | Urbanus esmeraldus | Eudaminae        | 01-SRNP-17426       | MHAHC317-05           | DQ293739                 |
| 5097              | Urbanus esmeraldus | Eudaminae        | 01-SRNP-17562       | MHAHC226-05           | DQ293733                 |
| 5098              | Urbanus esmeraldus | Eudaminae        | 02-SRNP-13383       | MHAHC218-05           | DQ293731                 |
| 5099              | Urbanus esmeraldus | Eudaminae        | 04-SRNP-45661       | MHAHC053-05           | DQ293727                 |
| 5100              | Urbanus esmeraldus | Eudaminae        | 04-SRNP-45660       | MHAHC014-05           | DQ293725                 |
| 5101              | Urbanus esmeraldus | Eudaminae        | 04-SRNP-45662       | MHAHC030-05           | DQ293726                 |
| 5102              | Urbanus esmeraldus | Eudaminae        | 05-SRNP-33816       | MHAHG574-06           | GU151838                 |
| 5103              | Urbanus esmeraldus | Eudaminae        | 03-SRNP-16910       | MHAHI956-07           | GU156436                 |
| 5104              | Urbanus esmeraldus | Eudaminae        | 01-SRNP-17439       | MHAHC328-05           | DQ293741                 |
| 5105              | Urbanus esmeraldus | Eudaminae        | 97-SRNP-4639        | MHAHI940-07           | GU156420                 |
| 5106              | Urbanus esmeraldus | Eudaminae        | 97-SRNP-4567        | MHAHI941-07           | GU156421                 |
| 5107              | Urbanus esmeraldus | Eudaminae        | 97-SRNP-4640        | MHAHI942-07           | GU156422                 |
| 5108              | Urbanus esmeraldus | Eudaminae        | 99-SRNP-8598        | MHAHI966-07           | GU156446                 |
| 5109              | Urbanus esmeraldus | Eudaminae        | 04-SRNP-45064       | MHAHI954-07           | GU156434                 |
| 5110              | Urbanus esmeraldus | Eudaminae        | 01-SRNP-17131       | MHAHI988-07           | GU156466                 |
| 5111              | Urbanus esmeraldus | Eudaminae        | 97-SRNP-4936        | MHAHI943-07           | GU156423                 |
| 5112              | Urbanus esmeraldus | Eudaminae        | 97-SRNP-9658        | MHAHI925-07           | GU156406                 |
| 5113              | Urbanus esmeraldus | Eudaminae        | 01-SRNP-17047       | MHAHI987-07           | GU156465                 |
| 5114              | Urbanus esmeraldus | Eudaminae        | 97-SRNP-9211        | MHAHI923-07           | GU156404                 |
| 5115              | Urbanus esmeraldus | Eudaminae        | 04-SRNP-21981       | MHAHI957-07           | GU156437                 |
| 5116              | Urbanus esmeraldus | Eudaminae        | 04-SRNP-45065       | MHAHI955-07           | GU156435                 |
| 5117              | Urbanus esmeraldus | Eudaminae        | 03-SRNP-19022       | MHAHI946-07           | GU156426                 |
| 5118              | Urbanus esmeraldus | Eudaminae        | 03-SRNP-17465       | MHAHI945-07           | GU156425                 |
| 5119              | Urbanus esmeraldus | Eudaminae        | 97-SRNP-5646        | MHAHI937-07           | GU156418                 |
| 5120              | Urbanus esmeraldus | Eudaminae        | 97-SRNP-9554        | MHAHI932-07           | GU156413                 |
| 5121              | Urbanus esmeraldus | Eudaminae        | 96-SRNP-11210       | MHAHI931-07           | GU156412                 |
| 5122              | Urbanus esmeraldus | Eudaminae        | 97-SRNP-9552        | MHAHI930-07           | GU156411                 |
| 5123              | Urbanus esmeraldus | Eudaminae        | 97-SRNP-9531        | MHAHI929-07           | GU156409                 |
| 5124              | Urbanus esmeraldus | Eudaminae        | 97-SRNP-9530        | MHAHI928-07           | GU156410                 |
| 5125              | Urbanus esmeraldus | Eudaminae        | 97-SRNP-9208        | MHAHI927-07           | GU156408                 |
| 5126              | Urbanus esmeraldus | Eudaminae        | 97-SRNP-9647        | MHAHI924-07           | GU156405                 |
| 5127              | Urbanus esmeraldus | Eudaminae        | 97-SRNP-9558        | MHAHI921-07           | GU156402                 |
| 5128              | Urbanus esmeraldus | Eudaminae        | 97-SRNP-9645        | MHAHI919-07           | GU156400                 |
| 5129              | Urbanus esmeraldus | Eudaminae        | 97-SRNP-9843        | MHAHI917-07           | GU156398                 |
| 5130              | Urbanus esmeraldus | Eudaminae        | 97-SRNP-9646        | MHAHI920-07           | GU156401                 |
| 5131              | Urbanus esmeraldus | Eudaminae        | 97-SRNP-5807        | MHAHI922-07           | GU156403                 |
| 5132              | Urbanus esmeraldus | Eudaminae        | 05-SRNP-32029       | MHAHF902-06           | GU151004                 |
| 5133              | Urbanus esmeraldus | Eudaminae        | 03-SRNP-29671       | MHAHI959-07           | GU156439                 |
| 5134              | Urbanus esmeraldus | Eudaminae        | 02-SRNP-5961        | MHAHI970-07           | GU156449                 |
| 5135              | Urbanus esmeraldus | Eudaminae        | 01-SRNP-17079       | MHAHI971-07           | GU156450                 |
| 5136              | Urbanus esmeraldus | Eudaminae        | 01-SRNP-17158       | MHAHI972-07           | GU156451                 |
| 5137              | Urbanus esmeraldus | Eudaminae        | 01-SRNP-17566       | MHAHI979-07           | GU156458                 |
| 5138              | Urbanus esmeraldus | Eudaminae        | 95-SRNP-9803        | MHAHI984-07           | GU156462                 |
| 5139              | Urbanus esmeraldus | Eudaminae        | 95-SRNP-9805        | MHAHI985-07           | GU156463                 |
| 5140              | Urbanus esmeraldus | Eudaminae        | 95-SRNP-9968        | MHAHI986-07           | GU156464                 |
| 5141              | Urbanus esmeraldus | Eudaminae        | 95-SRNP-8976        | MHAHI989-07           | GU156467                 |
| 5142              | Urbanus esmeraldus | Eudaminae        | 01-SRNP-17083       | MHAHI990-07           | GU156468                 |
| 5143              | Urbanus esmeraldus | Eudaminae        | 03-SRNP-16636       | MHAHI991-07           | GU156469                 |
| 5144              | Urbanus esmeraldus | Eudaminae        | 06-SRNP-34518       | MHAHJ638-07           | JF753238                 |
| 5145              | Urbanus esmeraldus | Eudaminae        | 06-SRNP-46734       | MHAHJ742-07           | JF753239                 |
| 5146              | Urbanus esmeraldus | Eudaminae        | 07-SRNP-56341       | MHMXK294-07           | JF763343                 |
| 5147              | Urbanus esmeraldus | Eudaminae        | 07-SRNP-56359       | MHMXK307-07           | JF763346                 |
| 5148              | Urbanus esmeraldus | Eudaminae        | 07-SRNP-56490       | MHMXK308-07           | JF763345                 |
| 5149              | Urbanus esmeraldus | Eudaminae        | 07-SRNP-20117       | MHMXK310-07           | JF763344                 |
| 5150              | Urbanus esmeraldus | Eudaminae        | 07-SRNP-58471       | MHMXO803-08           | JF750913                 |
| 5151              | Urbanus esmeraldus | Eudaminae        | 07-SRNP-57861       | MHMXO806-08           | JF750914                 |

| <b>Tree Order</b> | <b>Species</b>     | <b>Subfamily</b> | <b>ACG Sampleid</b> | <b>BOLD Processid</b> | <b>Genbank Accession</b> |
|-------------------|--------------------|------------------|---------------------|-----------------------|--------------------------|
| 5152              | Urbanus esmeraldus | Eudaminae        | 07-SRNP-57862       | MHMXO811-08           | JF763342                 |
| 5153              | Urbanus esmeraldus | Eudaminae        | 08-SRNP-21596       | MHMXW468-09           | JF754369                 |
| 5154              | Urbanus esmeraldus | Eudaminae        | 08-SRNP-23543       | MHMXY947-09           | GU666571                 |
| 5155              | Urbanus esmeraldus | Eudaminae        | 08-SRNP-58525       | MHMYC526-09           | GU649818                 |
| 5156              | Urbanus proteus    | Eudaminae        | 97-SRNP-2922        | MHAHI906-07           | GU156622                 |
| 5157              | Urbanus proteus    | Eudaminae        | 02-SRNP-17912       | MHAHC316-05           | DQ293828                 |
| 5158              | Urbanus proteus    | Eudaminae        | 02-SRNP-17915       | MHAHC189-05           | DQ293794                 |
| 5159              | Urbanus proteus    | Eudaminae        | 02-SRNP-15156       | MHAHC235-05           | DQ293813                 |
| 5160              | Urbanus proteus    | Eudaminae        | 02-SRNP-28591       | MHAHI704-07           | GU156542                 |
| 5161              | Urbanus proteus    | Eudaminae        | 03-SRNP-16230       | MHAHI797-07           | GU156691                 |
| 5162              | Urbanus proteus    | Eudaminae        | 02-SRNP-17914       | MHAHC250-05           | DQ293819                 |
| 5163              | Urbanus proteus    | Eudaminae        | 97-SRNP-4503        | MHAHI874-07           | GU156514                 |
| 5164              | Urbanus proteus    | Eudaminae        | 94-SRNP-744         | MHAHI877-07           | GU156583                 |
| 5165              | Urbanus proteus    | Eudaminae        | 07-SRNP-55548       | MHMXK284-07           | JF763380                 |
| 5166              | Urbanus proteus    | Eudaminae        | 08-SRNP-71742       | MHMXX467-09           | JF750918                 |
| 5167              | Urbanus proteus    | Eudaminae        | 03-SRNP-16609       | MHAHI813-07           | GU156710                 |
| 5168              | Urbanus proteus    | Eudaminae        | 04-SRNP-12473       | MHAHC281-05           | DQ293824                 |
| 5169              | Urbanus proteus    | Eudaminae        | 04-SRNP-12477       | MHAHC022-05           | DQ293786                 |
| 5170              | Urbanus proteus    | Eudaminae        | 02-SRNP-1925        | MHAHC196-05           | DQ293798                 |
| 5171              | Urbanus proteus    | Eudaminae        | 04-SRNP-12475       | MHAHC211-05           | DQ293806                 |
| 5172              | Urbanus proteus    | Eudaminae        | 01-SRNP-4528        | MHAHI692-07           | GU156484                 |
| 5173              | Urbanus proteus    | Eudaminae        | 06-SRNP-4935        | MHAHI027-06           | GU156490                 |
| 5174              | Urbanus proteus    | Eudaminae        | 06-SRNP-20639       | MHAHH551-06           | GU155716                 |
| 5175              | Urbanus proteus    | Eudaminae        | 03-SRNP-16767       | MHAHI755-07           | GU156653                 |
| 5176              | Urbanus proteus    | Eudaminae        | 06-SRNP-31010       | MHAHG606-06           | GU151880                 |
| 5177              | Urbanus proteus    | Eudaminae        | 05-SRNP-31866       | MHAHF918-06           | GU151016                 |
| 5178              | Urbanus proteus    | Eudaminae        | 04-SRNP-45320       | MHAHC023-05           | DQ293787                 |
| 5179              | Urbanus proteus    | Eudaminae        | 04-SRNP-45321       | MHAHC007-05           | DQ293784                 |
| 5180              | Urbanus proteus    | Eudaminae        | 06-SRNP-33300       | MHAHI464-06           | GU156487                 |
| 5181              | Urbanus proteus    | Eudaminae        | 02-SRNP-15123       | MHAHI719-07           | GU156549                 |
| 5182              | Urbanus proteus    | Eudaminae        | 03-SRNP-16621       | MHAHI733-07           | GU156562                 |
| 5183              | Urbanus proteus    | Eudaminae        | 03-SRNP-16637       | MHAHI734-07           | GU156577                 |
| 5184              | Urbanus proteus    | Eudaminae        | 03-SRNP-12324       | MHAHI774-07           | GU156673                 |
| 5185              | Urbanus proteus    | Eudaminae        | 03-SRNP-16601       | MHAHI828-07           | GU156612                 |
| 5186              | Urbanus proteus    | Eudaminae        | 03-SRNP-16778       | MHAHI829-07           | GU156619                 |
| 5187              | Urbanus proteus    | Eudaminae        | 02-SRNP-29399       | MHAHC244-05           | DQ293816                 |
| 5188              | Urbanus proteus    | Eudaminae        | 03-SRNP-16782       | MHAHI730-07           | GU156564                 |
| 5189              | Urbanus proteus    | Eudaminae        | 03-SRNP-16605       | MHAHI775-07           | GU156674                 |
| 5190              | Urbanus proteus    | Eudaminae        | 98-SRNP-4627        | MHAHI864-07           | GU156488                 |
| 5191              | Urbanus proteus    | Eudaminae        | 02-SRNP-29473       | MHAHI866-07           | GU156494                 |
| 5192              | Urbanus proteus    | Eudaminae        | 02-SRNP-17900       | MHAHC243-05           | DQ293815                 |
| 5193              | Urbanus proteus    | Eudaminae        | 02-SRNP-17897       | MHAHC242-05           | DQ293814                 |
| 5194              | Urbanus proteus    | Eudaminae        | 02-SRNP-17894       | MHMXF863-07           | JF761274                 |
| 5195              | Urbanus proteus    | Eudaminae        | 01-SRNP-12172       | MHAHC335-05           | DQ293834                 |
| 5196              | Urbanus proteus    | Eudaminae        | 02-SRNP-28088       | MHAHI717-07           | GU156556                 |
| 5197              | Urbanus proteus    | Eudaminae        | 02-SRNP-28087       | MHAHI898-07           | GU156604                 |
| 5198              | Urbanus proteus    | Eudaminae        | 97-SRNP-2035        | MHAHI851-07           | GU156511                 |
| 5199              | Urbanus proteus    | Eudaminae        | 95-SRNP-4168        | MHAHI860-07           | GU156641                 |
| 5200              | Urbanus proteus    | Eudaminae        | 02-SRNP-15336       | MHAHC227-05           | DQ293809                 |
| 5201              | Urbanus proteus    | Eudaminae        | 97-SRNP-3765        | MHAHI875-07           | GU156523                 |
| 5202              | Urbanus proteus    | Eudaminae        | 97-SRNP-450         | MHAHI867-07           | GU156480                 |
| 5203              | Urbanus proteus    | Eudaminae        | 97-SRNP-4059        | MHAHI876-07           | GU156519                 |
| 5204              | Urbanus proteus    | Eudaminae        | 07-SRNP-65362       | MHMXO817-08           | JF763367                 |
| 5205              | Urbanus proteus    | Eudaminae        | 07-SRNP-65363       | MHMXO813-08           | JF763371                 |
| 5206              | Urbanus proteus    | Eudaminae        | 07-SRNP-65361       | MHMXO812-08           | JF763372                 |
| 5207              | Urbanus proteus    | Eudaminae        | 04-SRNP-22094       | MHAHI785-07           | GU156682                 |

| <b>Tree Order</b> | <b>Species</b>  | <b>Subfamily</b> | <b>ACG Sampleid</b> | <b>BOLD Processid</b> | <b>Genbank Accession</b> |
|-------------------|-----------------|------------------|---------------------|-----------------------|--------------------------|
| 5208              | Urbanus proteus | Eudaminae        | 06-SRNP-20989       | MHAHH553-06           | GU155715                 |
| 5209              | Urbanus proteus | Eudaminae        | 06-SRNP-20638       | MHAHH534-06           | GU155702                 |
| 5210              | Urbanus proteus | Eudaminae        | 05-SRNP-42674       | MHAHG588-06           | GU151877                 |
| 5211              | Urbanus proteus | Eudaminae        | 05-SRNP-42675       | MHAHG586-06           | GU151876                 |
| 5212              | Urbanus proteus | Eudaminae        | 02-SRNP-28144       | MHAHC253-05           | DQ293821                 |
| 5213              | Urbanus proteus | Eudaminae        | 09-SRNP-44384       | MHMYE865-09           | GU653737                 |
| 5214              | Urbanus proteus | Eudaminae        | 95-SRNP-4171        | MHAHI859-07           | GU156601                 |
| 5215              | Urbanus proteus | Eudaminae        | 08-SRNP-65051       | MHMXT187-08           | JF763363                 |
| 5216              | Urbanus proteus | Eudaminae        | 07-SRNP-20070       | MHMXX314-07           | JF763382                 |
| 5217              | Urbanus proteus | Eudaminae        | 02-SRNP-1919        | MHAHI911-07           | GU156626                 |
| 5218              | Urbanus proteus | Eudaminae        | 03-SRNP-16226       | MHAHI794-07           | GU156695                 |
| 5219              | Urbanus proteus | Eudaminae        | 04-SRNP-45331       | MHAHI752-07           | GU156650                 |
| 5220              | Urbanus proteus | Eudaminae        | 04-SRNP-22097       | MHAHI749-07           | GU156643                 |
| 5221              | Urbanus proteus | Eudaminae        | 03-SRNP-16604       | MHAHI745-07           | GU156644                 |
| 5222              | Urbanus proteus | Eudaminae        | 03-SRNP-16643       | MHAHI743-07           | GU156636                 |
| 5223              | Urbanus proteus | Eudaminae        | 03-SRNP-2587        | MHAHI728-07           | GU156563                 |
| 5224              | Urbanus proteus | Eudaminae        | 03-SRNP-2943        | MHAHI724-07           | GU156524                 |
| 5225              | Urbanus proteus | Eudaminae        | 06-SRNP-20992       | MHAHH542-06           | GU155710                 |
| 5226              | Urbanus proteus | Eudaminae        | 03-SRNP-16622       | MHAHI729-07           | GU156561                 |
| 5227              | Urbanus proteus | Eudaminae        | 97-SRNP-4440        | MHAHI865-07           | GU156491                 |
| 5228              | Urbanus proteus | Eudaminae        | 03-SRNP-16638       | MHAHI744-07           | GU156635                 |
| 5229              | Urbanus proteus | Eudaminae        | 97-SRNP-5092        | MHAHI916-07           | GU156497                 |
| 5230              | Urbanus proteus | Eudaminae        | 97-SRNP-2067        | MHAHI912-07           | GU156628                 |
| 5231              | Urbanus proteus | Eudaminae        | 95-SRNP-4170        | MHAHI907-07           | GU156623                 |
| 5232              | Urbanus proteus | Eudaminae        | 97-SRNP-3766        | MHAHI904-07           | GU156620                 |
| 5233              | Urbanus proteus | Eudaminae        | 02-SRNP-28072       | MHAHI900-07           | GU156606                 |
| 5234              | Urbanus proteus | Eudaminae        | 01-SRNP-452         | MHAHI888-07           | GU156594                 |
| 5235              | Urbanus proteus | Eudaminae        | 01-SRNP-978         | MHAHI886-07           | GU156588                 |
| 5236              | Urbanus proteus | Eudaminae        | 95-SRNP-6395        | MHAHI881-07           | GU156587                 |
| 5237              | Urbanus proteus | Eudaminae        | 95-SRNP-9306        | MHAHI880-07           | GU156586                 |
| 5238              | Urbanus proteus | Eudaminae        | 97-SRNP-3010        | MHAHI879-07           | GU156585                 |
| 5239              | Urbanus proteus | Eudaminae        | 95-SRNP-9354        | MHAHI870-07           | GU156507                 |
| 5240              | Urbanus proteus | Eudaminae        | 94-SRNP-3026        | MHAHI868-07           | GU156503                 |
| 5241              | Urbanus proteus | Eudaminae        | 97-SRNP-2037        | MHAHI873-07           | GU156495                 |
| 5242              | Urbanus proteus | Eudaminae        | 04-SRNP-45179       | MHAHC046-05           | DQ293788                 |
| 5243              | Urbanus proteus | Eudaminae        | 02-SRNP-28093       | MHAHI899-07           | GU156605                 |
| 5244              | Urbanus proteus | Eudaminae        | 03-SRNP-16771       | MHAHI772-07           | GU156672                 |
| 5245              | Urbanus proteus | Eudaminae        | 02-SRNP-15128       | MHAHI862-07           | GU156482                 |
| 5246              | Urbanus proteus | Eudaminae        | 95-SRNP-4169        | MHAHI869-07           | GU156506                 |
| 5247              | Urbanus proteus | Eudaminae        | 97-SRNP-5093        | MHAHI910-07           | GU156627                 |
| 5248              | Urbanus proteus | Eudaminae        | 97-SRNP-4803        | MHAHI902-07           | GU156607                 |
| 5249              | Urbanus proteus | Eudaminae        | 07-SRNP-65369       | MHM XR788-08          | JF763366                 |
| 5250              | Urbanus proteus | Eudaminae        | 03-SRNP-16611       | MHAHI758-07           | GU156655                 |
| 5251              | Urbanus proteus | Eudaminae        | 03-SRNP-16895       | MHAHI725-07           | GU156518                 |
| 5252              | Urbanus proteus | Eudaminae        | 02-SRNP-28761       | MHAHI706-07           | GU156540                 |
| 5253              | Urbanus proteus | Eudaminae        | 02-SRNP-28758       | MHAHI708-07           | GU156534                 |
| 5254              | Urbanus proteus | Eudaminae        | 01-SRNP-443         | MHAHI882-07           | GU156584                 |
| 5255              | Urbanus proteus | Eudaminae        | 04-SRNP-22098       | MHAHI757-07           | GU156656                 |
| 5256              | Urbanus proteus | Eudaminae        | 04-SRNP-22007       | MHAHI741-07           | GU156481                 |
| 5257              | Urbanus proteus | Eudaminae        | 04-SRNP-47421       | MHAHC313-05           | DQ293825                 |
| 5258              | Urbanus proteus | Eudaminae        | 04-SRNP-33891       | MHAHC708-05           | DQ293840                 |
| 5259              | Urbanus proteus | Eudaminae        | 05-SRNP-32458       | MHAHG583-06           | GU151873                 |
| 5260              | Urbanus proteus | Eudaminae        | 05-SRNP-32459       | MHAHG584-06           | GU151872                 |
| 5261              | Urbanus proteus | Eudaminae        | 04-SRNP-22087       | MHAHI761-07           | GU156659                 |
| 5262              | Urbanus proteus | Eudaminae        | 03-SRNP-16631       | MHAHI780-07           | GU156678                 |
| 5263              | Urbanus proteus | Eudaminae        | 03-SRNP-17441       | MHAHI848-07           | GU156603                 |

| <b>Tree Order</b> | <b>Species</b>  | <b>Subfamily</b> | <b>ACG Sampleid</b> | <b>BOLD Processid</b> | <b>Genbank Accession</b> |
|-------------------|-----------------|------------------|---------------------|-----------------------|--------------------------|
| 5264              | Urbanus proteus | Eudaminae        | 07-SRNP-65360       | MHMXO816-08           | JF763368                 |
| 5265              | Urbanus proteus | Eudaminae        | 08-SRNP-55989       | MHMXW454-09           | JF754370                 |
| 5266              | Urbanus proteus | Eudaminae        | 08-SRNP-55990       | MHMXW460-09           | JF754374                 |
| 5267              | Urbanus proteus | Eudaminae        | 02-SRNP-28070       | MHAHI720-07           | GU156547                 |
| 5268              | Urbanus proteus | Eudaminae        | 04-SRNP-33890       | MHAHE157-05           | GU150135                 |
| 5269              | Urbanus proteus | Eudaminae        | 06-SRNP-32779       | MHAHI461-06           | GU156489                 |
| 5270              | Urbanus proteus | Eudaminae        | 97-SRNP-4502        | MHMXF858-07           | JF761279                 |
| 5271              | Urbanus proteus | Eudaminae        | 04-SRNP-21999       | MHAHI751-07           | GU156649                 |
| 5272              | Urbanus proteus | Eudaminae        | 04-SRNP-21804       | MHAHI747-07           | GU156645                 |
| 5273              | Urbanus proteus | Eudaminae        | 07-SRNP-22160       | MHAHL450-07           | JF763358                 |
| 5274              | Urbanus proteus | Eudaminae        | 02-SRNP-28876       | MHAHC315-05           | DQ293827                 |
| 5275              | Urbanus proteus | Eudaminae        | 05-SRNP-21817       | MHAHF925-06           | GU151022                 |
| 5276              | Urbanus proteus | Eudaminae        | 02-SRNP-17496       | MHAHI700-07           | GU156533                 |
| 5277              | Urbanus proteus | Eudaminae        | 03-SRNP-16618       | MHAHI826-07           | GU156618                 |
| 5278              | Urbanus proteus | Eudaminae        | 94-SRNP-2742        | MHAHI871-07           | GU156508                 |
| 5279              | Urbanus proteus | Eudaminae        | 94-SRNP-3012        | MHAHI872-07           | GU156509                 |
| 5280              | Urbanus proteus | Eudaminae        | 01-SRNP-1156        | MHMXF857-07           | JF761280                 |
| 5281              | Urbanus proteus | Eudaminae        | 03-SRNP-6987        | MHAHI739-07           | GU156579                 |
| 5282              | Urbanus proteus | Eudaminae        | 01-SRNP-5597        | MHMXF855-07           | JF761272                 |
| 5283              | Urbanus proteus | Eudaminae        | 03-SRNP-2029        | MHAHI806-07           | GU156704                 |
| 5284              | Urbanus proteus | Eudaminae        | 02-SRNP-28921       | MHAHC229-05           | DQ293810                 |
| 5285              | Urbanus proteus | Eudaminae        | 06-SRNP-20652       | MHAHH548-06           | GU155714                 |
| 5286              | Urbanus proteus | Eudaminae        | 08-SRNP-65133       | MHMXW459-09           | JF754373                 |
| 5287              | Urbanus proteus | Eudaminae        | 02-SRNP-28879       | MHAHC222-05           | DQ293808                 |
| 5288              | Urbanus proteus | Eudaminae        | 04-SRNP-45319       | MHAHC087-05           | DQ293792                 |
| 5289              | Urbanus proteus | Eudaminae        | 03-SRNP-2585        | MHAHI756-07           | GU156654                 |
| 5290              | Urbanus proteus | Eudaminae        | 04-SRNP-45322       | MHAHI847-07           | GU156572                 |
| 5291              | Urbanus proteus | Eudaminae        | 04-SRNP-22092       | MHAHI849-07           | GU156513                 |
| 5292              | Urbanus proteus | Eudaminae        | 04-SRNP-32060       | MHAHI845-07           | GU156571                 |
| 5293              | Urbanus proteus | Eudaminae        | 03-SRNP-20447       | MHAHI846-07           | GU156575                 |
| 5294              | Urbanus proteus | Eudaminae        | 06-SRNP-6068        | MHAHJ739-07           | JF753245                 |
| 5295              | Urbanus proteus | Eudaminae        | 06-SRNP-6067        | MHAHJ741-07           | JF753246                 |
| 5296              | Urbanus proteus | Eudaminae        | 02-SRNP-17493       | MHAHC202-05           | DQ293801                 |
| 5297              | Urbanus proteus | Eudaminae        | 02-SRNP-29476       | MHAHI703-07           | GU156537                 |
| 5298              | Urbanus proteus | Eudaminae        | 03-SRNP-16629       | MHAHI818-07           | GU156637                 |
| 5299              | Urbanus proteus | Eudaminae        | 02-SRNP-28091       | MHAHC194-05           | DQ293796                 |
| 5300              | Urbanus proteus | Eudaminae        | 02-SRNP-17905       | MHAHC230-05           | DQ293811                 |
| 5301              | Urbanus proteus | Eudaminae        | 02-SRNP-17917       | MHAHC245-05           | DQ293817                 |
| 5302              | Urbanus proteus | Eudaminae        | 02-SRNP-17500       | MHAHC219-05           | DQ293807                 |
| 5303              | Urbanus proteus | Eudaminae        | 04-SRNP-22439       | MHAHC061-05           | DQ293789                 |
| 5304              | Urbanus proteus | Eudaminae        | 04-SRNP-22142       | MHAHC006-05           | DQ293783                 |
| 5305              | Urbanus proteus | Eudaminae        | 04-SRNP-21276       | MHAHC062-05           | DQ293790                 |
| 5306              | Urbanus proteus | Eudaminae        | 04-SRNP-45255       | MHAHC015-05           | DQ293785                 |
| 5307              | Urbanus proteus | Eudaminae        | 04-SRNP-21421       | MHAHC071-05           | DQ293791                 |
| 5308              | Urbanus proteus | Eudaminae        | 03-SRNP-16772       | MHAHI817-07           | GU156639                 |
| 5309              | Urbanus proteus | Eudaminae        | 02-SRNP-28089       | MHAHI909-07           | GU156625                 |
| 5310              | Urbanus proteus | Eudaminae        | 05-SRNP-42099       | MHAHF898-06           | GU151021                 |
| 5311              | Urbanus proteus | Eudaminae        | 04-SRNP-45328       | MHAHI782-07           | GU156680                 |
| 5312              | Urbanus proteus | Eudaminae        | 04-SRNP-21992       | MHAHI742-07           | GU156498                 |
| 5313              | Urbanus proteus | Eudaminae        | 04-SRNP-22095       | MHAHI787-07           | GU156684                 |
| 5314              | Urbanus proteus | Eudaminae        | 06-SRNP-20650       | MHAHH550-06           | GU155712                 |
| 5315              | Urbanus proteus | Eudaminae        | 02-SRNP-28763       | MHAHI699-07           | GU156532                 |
| 5316              | Urbanus proteus | Eudaminae        | 04-SRNP-21997       | MHAHI835-07           | GU156510                 |
| 5317              | Urbanus proteus | Eudaminae        | 04-SRNP-21991       | MHAHI838-07           | GU156516                 |
| 5318              | Urbanus proteus | Eudaminae        | 04-SRNP-21993       | MHAHI842-07           | GU156570                 |
| 5319              | Urbanus proteus | Eudaminae        | 03-SRNP-17430       | MHAHI731-07           | GU156560                 |

| <b>Tree Order</b> | <b>Species</b>  | <b>Subfamily</b> | <b>ACG Sampleid</b> | <b>BOLD Processid</b> | <b>Genbank Accession</b> |
|-------------------|-----------------|------------------|---------------------|-----------------------|--------------------------|
| 5320              | Urbanus proteus | Eudaminae        | 05-SRNP-22290       | MHAHF920-06           | GU151019                 |
| 5321              | Urbanus proteus | Eudaminae        | 07-SRNP-56187       | MHMXK289-07           | JF763377                 |
| 5322              | Urbanus proteus | Eudaminae        | 06-SRNP-22060       | MHAHJ606-07           | JF753244                 |
| 5323              | Urbanus proteus | Eudaminae        | 06-SRNP-20672       | MHAHH552-06           | GU155717                 |
| 5324              | Urbanus proteus | Eudaminae        | 06-SRNP-32781       | MHAHI043-06           | GU156502                 |
| 5325              | Urbanus proteus | Eudaminae        | 02-SRNP-32259       | MHAHC195-05           | DQ293797                 |
| 5326              | Urbanus proteus | Eudaminae        | 02-SRNP-1921        | MHAHI897-07           | GU156602                 |
| 5327              | Urbanus proteus | Eudaminae        | 03-SRNP-2512        | MHAHI768-07           | GU156667                 |
| 5328              | Urbanus proteus | Eudaminae        | 03-SRNP-16896       | MHAHI732-07           | GU156557                 |
| 5329              | Urbanus proteus | Eudaminae        | 03-SRNP-16625       | MHAHI781-07           | GU156681                 |
| 5330              | Urbanus proteus | Eudaminae        | 03-SRNP-16606       | MHAHI823-07           | GU156614                 |
| 5331              | Urbanus proteus | Eudaminae        | 02-SRNP-28094       | MHAHC206-05           | DQ293804                 |
| 5332              | Urbanus proteus | Eudaminae        | 07-SRNP-32675       | MHAHL449-07           | JF763357                 |
| 5333              | Urbanus proteus | Eudaminae        | 08-SRNP-71996       | MHMXX469-09           | JF750919                 |
| 5334              | Urbanus proteus | Eudaminae        | 09-SRNP-70674       | MHMYE1571-09          | HM391131                 |
| 5335              | Urbanus proteus | Eudaminae        | 02-SRNP-17909       | MHAHC314-05           | DQ293826                 |
| 5336              | Urbanus proteus | Eudaminae        | 02-SRNP-17892       | MHAHC234-05           | DQ293812                 |
| 5337              | Urbanus proteus | Eudaminae        | 06-SRNP-32816       | MHAHI617-06           | GU156640                 |
| 5338              | Urbanus proteus | Eudaminae        | 02-SRNP-15161       | MHMXF854-07           | JF761273                 |
| 5339              | Urbanus proteus | Eudaminae        | 06-SRNP-32782       | MHAHI040-06           | GU156493                 |
| 5340              | Urbanus proteus | Eudaminae        | 06-SRNP-32807       | MHAHI041-06           | GU156504                 |
| 5341              | Urbanus proteus | Eudaminae        | 06-SRNP-21095       | MHAHH545-06           | GU155711                 |
| 5342              | Urbanus proteus | Eudaminae        | 06-SRNP-20993       | MHAHH549-06           | GU155713                 |
| 5343              | Urbanus proteus | Eudaminae        | 06-SRNP-21060       | MHAHH543-06           | GU155707                 |
| 5344              | Urbanus proteus | Eudaminae        | 06-SRNP-21281       | MHAHH544-06           | GU155709                 |
| 5345              | Urbanus proteus | Eudaminae        | 06-SRNP-20649       | MHAHH538-06           | GU155701                 |
| 5346              | Urbanus proteus | Eudaminae        | 06-SRNP-21046       | MHAHH539-06           | GU155706                 |
| 5347              | Urbanus proteus | Eudaminae        | 05-SRNP-55628       | MHAHF916-06           | GU151017                 |
| 5348              | Urbanus proteus | Eudaminae        | 06-SRNP-30958       | MHAHG330-06           | GU151881                 |
| 5349              | Urbanus proteus | Eudaminae        | 05-SRNP-31865       | MHAHF899-06           | GU151023                 |
| 5350              | Urbanus proteus | Eudaminae        | 05-SRNP-41526       | MHAHF914-06           | GU151018                 |
| 5351              | Urbanus proteus | Eudaminae        | 05-SRNP-33815       | MHAHF893-06           | GU151020                 |
| 5352              | Urbanus proteus | Eudaminae        | 05-SRNP-46456       | MHAHF894-06           | GU151024                 |
| 5353              | Urbanus proteus | Eudaminae        | 02-SRNP-17495       | MHAHD420-05           | GU162014                 |
| 5354              | Urbanus proteus | Eudaminae        | 01-SRNP-12344       | MHAHD930-05           | GU162013                 |
| 5355              | Urbanus proteus | Eudaminae        | 02-SRNP-29166       | MHAHC197-05           | DQ293799                 |
| 5356              | Urbanus proteus | Eudaminae        | 02-SRNP-17910       | MHAHC205-05           | DQ293803                 |
| 5357              | Urbanus proteus | Eudaminae        | 02-SRNP-17902       | MHAHC190-05           | DQ293795                 |
| 5358              | Urbanus proteus | Eudaminae        | 02-SRNP-28882       | MHAHC198-05           | DQ293800                 |
| 5359              | Urbanus proteus | Eudaminae        | 02-SRNP-17499       | MHAHC188-05           | DQ293793                 |
| 5360              | Urbanus proteus | Eudaminae        | 02-SRNP-17904       | MHAHC204-05           | DQ293802                 |
| 5361              | Urbanus proteus | Eudaminae        | 01-SRNP-17048       | MHAHC350-05           | DQ293839                 |
| 5362              | Urbanus proteus | Eudaminae        | 02-SRNP-17891       | MHAHC209-05           | DQ293805                 |
| 5363              | Urbanus proteus | Eudaminae        | 01-SRNP-444         | MHAHC337-05           | DQ293835                 |
| 5364              | Urbanus proteus | Eudaminae        | 01-SRNP-5650        | MHAHC338-05           | DQ293836                 |
| 5365              | Urbanus proteus | Eudaminae        | 01-SRNP-448         | MHAHC340-05           | DQ293837                 |
| 5366              | Urbanus proteus | Eudaminae        | 01-SRNP-12349       | MHAHC343-05           | DQ293838                 |
| 5367              | Urbanus proteus | Eudaminae        | 01-SRNP-12371       | MHAHC331-05           | DQ293832                 |
| 5368              | Urbanus proteus | Eudaminae        | 01-SRNP-449         | MHAHC332-05           | DQ293833                 |
| 5369              | Urbanus proteus | Eudaminae        | 01-SRNP-12318       | MHAHC326-05           | DQ293830                 |
| 5370              | Urbanus proteus | Eudaminae        | 01-SRNP-12370       | MHAHC330-05           | DQ293831                 |
| 5371              | Urbanus proteus | Eudaminae        | 01-SRNP-12346       | MHAHC324-05           | DQ293829                 |
| 5372              | Urbanus proteus | Eudaminae        | 01-SRNP-12345       | MHAHC325-05           | DQ293782                 |
| 5373              | Urbanus proteus | Eudaminae        | 04-SRNP-45076       | MHAHI754-07           | GU156652                 |
| 5374              | Urbanus proteus | Eudaminae        | 03-SRNP-7405        | MHAHI759-07           | GU156657                 |
| 5375              | Urbanus proteus | Eudaminae        | 04-SRNP-45299       | MHAHI750-07           | GU156648                 |



| <b>Tree Order</b> | <b>Species</b>  | <b>Subfamily</b> | <b>ACG Sampleid</b> | <b>BOLD Processid</b> | <b>Genbank Accession</b> |
|-------------------|-----------------|------------------|---------------------|-----------------------|--------------------------|
| 5376              | Urbanus proteus | Eudaminae        | 04-SRNP-45323       | MHAHI753-07           | GU156651                 |
| 5377              | Urbanus proteus | Eudaminae        | 02-SRNP-31168       | MHAHI696-07           | GU156527                 |
| 5378              | Urbanus proteus | Eudaminae        | 02-SRNP-28914       | MHAHI697-07           | GU156525                 |
| 5379              | Urbanus proteus | Eudaminae        | 02-SRNP-16019       | MHAHI694-07           | GU156529                 |
| 5380              | Urbanus proteus | Eudaminae        | 02-SRNP-28092       | MHAHI695-07           | GU156528                 |
| 5381              | Urbanus proteus | Eudaminae        | 01-SRNP-446         | MHAHI691-07           | GU156486                 |
| 5382              | Urbanus proteus | Eudaminae        | 01-SRNP-917         | MHAHI693-07           | GU156530                 |
| 5383              | Urbanus proteus | Eudaminae        | 02-SRNP-17899       | MHAHI689-07           | GU156630                 |
| 5384              | Urbanus proteus | Eudaminae        | 02-SRNP-17918       | MHAHI690-07           | GU156483                 |
| 5385              | Urbanus proteus | Eudaminae        | 01-SRNP-447         | MHMXF862-07           | JF761275                 |
| 5386              | Urbanus proteus | Eudaminae        | 02-SRNP-17896       | MHMXF864-07           | JF761282                 |
| 5387              | Urbanus proteus | Eudaminae        | 01-SRNP-453         | MHMXF860-07           | JF761277                 |
| 5388              | Urbanus proteus | Eudaminae        | 01-SRNP-4731        | MHMXF861-07           | JF761276                 |
| 5389              | Urbanus proteus | Eudaminae        | 02-SRNP-15124       | MHMXF856-07           | JF761281                 |
| 5390              | Urbanus proteus | Eudaminae        | 01-SRNP-12352       | MHMXF859-07           | JF761278                 |
| 5391              | Urbanus proteus | Eudaminae        | 06-SRNP-33586       | MHAHI465-06           | GU156492                 |
| 5392              | Urbanus proteus | Eudaminae        | 06-SRNP-33301       | MHAHI616-06           | GU156642                 |
| 5393              | Urbanus proteus | Eudaminae        | 06-SRNP-32780       | MHAHI042-06           | GU156505                 |
| 5394              | Urbanus proteus | Eudaminae        | 06-SRNP-32342       | MHAHI044-06           | GU156499                 |
| 5395              | Urbanus proteus | Eudaminae        | 06-SRNP-21280       | MHAHH540-06           | GU155705                 |
| 5396              | Urbanus proteus | Eudaminae        | 06-SRNP-20994       | MHAHH541-06           | GU155708                 |
| 5397              | Urbanus proteus | Eudaminae        | 06-SRNP-31653       | MHAHH535-06           | GU155703                 |
| 5398              | Urbanus proteus | Eudaminae        | 06-SRNP-20991       | MHAHH536-06           | GU155704                 |
| 5399              | Urbanus proteus | Eudaminae        | 05-SRNP-24255       | MHAHG595-06           | GU151878                 |
| 5400              | Urbanus proteus | Eudaminae        | 06-SRNP-45207       | MHAHG598-06           | GU151879                 |
| 5401              | Urbanus proteus | Eudaminae        | 05-SRNP-32492       | MHAHG581-06           | GU151875                 |
| 5402              | Urbanus proteus | Eudaminae        | 05-SRNP-32595       | MHAHG582-06           | GU151874                 |
| 5403              | Urbanus proteus | Eudaminae        | 05-SRNP-42295       | MHAHF895-06           | GU151026                 |
| 5404              | Urbanus proteus | Eudaminae        | 05-SRNP-31008       | MHAHF896-06           | GU151025                 |
| 5405              | Urbanus proteus | Eudaminae        | 02-SRNP-15154       | MHAHC254-05           | DQ293822                 |
| 5406              | Urbanus proteus | Eudaminae        | 04-SRNP-12474       | MHAHC280-05           | DQ293823                 |
| 5407              | Urbanus proteus | Eudaminae        | 02-SRNP-17907       | MHAHC249-05           | DQ293818                 |
| 5408              | Urbanus proteus | Eudaminae        | 02-SRNP-29478       | MHAHC251-05           | DQ293820                 |
| 5409              | Urbanus proteus | Eudaminae        | 04-SRNP-22006       | MHAHI790-07           | GU156690                 |
| 5410              | Urbanus proteus | Eudaminae        | 03-SRNP-16908       | MHAHI791-07           | GU156689                 |
| 5411              | Urbanus proteus | Eudaminae        | 03-SRNP-16781       | MHAHI777-07           | GU156675                 |
| 5412              | Urbanus proteus | Eudaminae        | 03-SRNP-16617       | MHAHI778-07           | GU156677                 |
| 5413              | Urbanus proteus | Eudaminae        | 03-SRNP-2586        | MHAHI770-07           | GU156670                 |
| 5414              | Urbanus proteus | Eudaminae        | 03-SRNP-16902       | MHAHI771-07           | GU156669                 |
| 5415              | Urbanus proteus | Eudaminae        | 03-SRNP-8110        | MHAHI767-07           | GU156665                 |
| 5416              | Urbanus proteus | Eudaminae        | 03-SRNP-2945        | MHAHI769-07           | GU156666                 |
| 5417              | Urbanus proteus | Eudaminae        | 03-SRNP-16897       | MHAHI765-07           | GU156663                 |
| 5418              | Urbanus proteus | Eudaminae        | 03-SRNP-2584        | MHAHI766-07           | GU156664                 |
| 5419              | Urbanus proteus | Eudaminae        | 04-SRNP-22103       | MHAHI763-07           | GU156661                 |
| 5420              | Urbanus proteus | Eudaminae        | 03-SRNP-2108        | MHAHI764-07           | GU156660                 |
| 5421              | Urbanus proteus | Eudaminae        | 04-SRNP-22000       | MHAHI760-07           | GU156658                 |
| 5422              | Urbanus proteus | Eudaminae        | 04-SRNP-21996       | MHAHI762-07           | GU156662                 |
| 5423              | Urbanus proteus | Eudaminae        | 04-SRNP-22004       | MHAHI746-07           | GU156646                 |
| 5424              | Urbanus proteus | Eudaminae        | 04-SRNP-45366       | MHAHI748-07           | GU156647                 |
| 5425              | Urbanus proteus | Eudaminae        | 04-SRNP-32097       | MHAHI738-07           | GU156581                 |
| 5426              | Urbanus proteus | Eudaminae        | 04-SRNP-22008       | MHAHI740-07           | GU156582                 |
| 5427              | Urbanus proteus | Eudaminae        | 03-SRNP-16893       | MHAHI736-07           | GU156578                 |
| 5428              | Urbanus proteus | Eudaminae        | 03-SRNP-16899       | MHAHI737-07           | GU156580                 |
| 5429              | Urbanus proteus | Eudaminae        | 03-SRNP-16635       | MHAHI727-07           | GU156559                 |
| 5430              | Urbanus proteus | Eudaminae        | 03-SRNP-16774       | MHAHI735-07           | GU156576                 |
| 5431              | Urbanus proteus | Eudaminae        | 03-SRNP-2535        | MHAHI723-07           | GU156543                 |

| <b>Tree Order</b> | <b>Species</b>  | <b>Subfamily</b> | <b>ACG Sampleid</b> | <b>BOLD Processid</b> | <b>Genbank Accession</b> |
|-------------------|-----------------|------------------|---------------------|-----------------------|--------------------------|
| 5432              | Urbanus proteus | Eudaminae        | 03-SRNP-16624       | MHAHI726-07           | GU156558                 |
| 5433              | Urbanus proteus | Eudaminae        | 02-SRNP-15147       | MHAHI721-07           | GU156546                 |
| 5434              | Urbanus proteus | Eudaminae        | 03-SRNP-2027        | MHAHI722-07           | GU156544                 |
| 5435              | Urbanus proteus | Eudaminae        | 02-SRNP-28073       | MHAHI716-07           | GU156548                 |
| 5436              | Urbanus proteus | Eudaminae        | 02-SRNP-7152        | MHAHI718-07           | GU156555                 |
| 5437              | Urbanus proteus | Eudaminae        | 02-SRNP-17906       | MHAHI707-07           | GU156536                 |
| 5438              | Urbanus proteus | Eudaminae        | 01-SRNP-976         | MHAHI709-07           | GU156531                 |
| 5439              | Urbanus proteus | Eudaminae        | 02-SRNP-17901       | MHAHI702-07           | GU156539                 |
| 5440              | Urbanus proteus | Eudaminae        | 02-SRNP-28917       | MHAHI705-07           | GU156541                 |
| 5441              | Urbanus proteus | Eudaminae        | 02-SRNP-28874       | MHAHI698-07           | GU156478                 |
| 5442              | Urbanus proteus | Eudaminae        | 02-SRNP-17911       | MHAHI701-07           | GU156538                 |
| 5443              | Urbanus proteus | Eudaminae        | 03-SRNP-2940        | MHAHI798-07           | GU156696                 |
| 5444              | Urbanus proteus | Eudaminae        | 03-SRNP-16894       | MHAHI799-07           | GU156697                 |
| 5445              | Urbanus proteus | Eudaminae        | 03-SRNP-19131       | MHAHI795-07           | GU156694                 |
| 5446              | Urbanus proteus | Eudaminae        | 03-SRNP-2367        | MHAHI796-07           | GU156692                 |
| 5447              | Urbanus proteus | Eudaminae        | 03-SRNP-2588        | MHAHI792-07           | GU156686                 |
| 5448              | Urbanus proteus | Eudaminae        | 03-SRNP-2028        | MHAHI793-07           | GU156693                 |
| 5449              | Urbanus proteus | Eudaminae        | 04-SRNP-22090       | MHAHI788-07           | GU156688                 |
| 5450              | Urbanus proteus | Eudaminae        | 04-SRNP-22089       | MHAHI789-07           | GU156687                 |
| 5451              | Urbanus proteus | Eudaminae        | 03-SRNP-2093        | MHAHI784-07           | GU156683                 |
| 5452              | Urbanus proteus | Eudaminae        | 04-SRNP-22002       | MHAHI786-07           | GU156685                 |
| 5453              | Urbanus proteus | Eudaminae        | 03-SRNP-20714       | MHAHI779-07           | GU156676                 |
| 5454              | Urbanus proteus | Eudaminae        | 03-SRNP-16616       | MHAHI783-07           | GU156679                 |
| 5455              | Urbanus proteus | Eudaminae        | 04-SRNP-45332       | MHAHI773-07           | GU156671                 |
| 5456              | Urbanus proteus | Eudaminae        | 03-SRNP-18903       | MHAHI776-07           | GU156668                 |
| 5457              | Urbanus proteus | Eudaminae        | 02-SRNP-28096       | MHAHI714-07           | GU156552                 |
| 5458              | Urbanus proteus | Eudaminae        | 02-SRNP-28071       | MHAHI715-07           | GU156550                 |
| 5459              | Urbanus proteus | Eudaminae        | 02-SRNP-17898       | MHAHI712-07           | GU156553                 |
| 5460              | Urbanus proteus | Eudaminae        | 02-SRNP-15366       | MHAHI713-07           | GU156554                 |
| 5461              | Urbanus proteus | Eudaminae        | 02-SRNP-28090       | MHAHI710-07           | GU156526                 |
| 5462              | Urbanus proteus | Eudaminae        | 02-SRNP-1917        | MHAHI711-07           | GU156551                 |
| 5463              | Urbanus proteus | Eudaminae        | 03-SRNP-16594       | MHAHI822-07           | GU156613                 |
| 5464              | Urbanus proteus | Eudaminae        | 03-SRNP-17445       | MHAHI824-07           | GU156615                 |
| 5465              | Urbanus proteus | Eudaminae        | 03-SRNP-16769       | MHAHI820-07           | GU156609                 |
| 5466              | Urbanus proteus | Eudaminae        | 03-SRNP-16898       | MHAHI821-07           | GU156610                 |
| 5467              | Urbanus proteus | Eudaminae        | 03-SRNP-2030        | MHAHI811-07           | GU156707                 |
| 5468              | Urbanus proteus | Eudaminae        | 03-SRNP-2112        | MHAHI812-07           | GU156711                 |
| 5469              | Urbanus proteus | Eudaminae        | 03-SRNP-2583        | MHAHI809-07           | GU156708                 |
| 5470              | Urbanus proteus | Eudaminae        | 04-SRNP-21995       | MHAHI810-07           | GU156709                 |
| 5471              | Urbanus proteus | Eudaminae        | 03-SRNP-2537        | MHAHI807-07           | GU156705                 |
| 5472              | Urbanus proteus | Eudaminae        | 03-SRNP-16770       | MHAHI808-07           | GU156706                 |
| 5473              | Urbanus proteus | Eudaminae        | 03-SRNP-15468       | MHAHI804-07           | GU156701                 |
| 5474              | Urbanus proteus | Eudaminae        | 03-SRNP-2944        | MHAHI805-07           | GU156703                 |
| 5475              | Urbanus proteus | Eudaminae        | 03-SRNP-2536        | MHAHI802-07           | GU156699                 |
| 5476              | Urbanus proteus | Eudaminae        | 03-SRNP-2582        | MHAHI803-07           | GU156702                 |
| 5477              | Urbanus proteus | Eudaminae        | 03-SRNP-16634       | MHAHI800-07           | GU156698                 |
| 5478              | Urbanus proteus | Eudaminae        | 03-SRNP-17406       | MHAHI801-07           | GU156700                 |
| 5479              | Urbanus proteus | Eudaminae        | 09-SRNP-70673       | MHMYE1458-09          | GU653540                 |
| 5480              | Urbanus proteus | Eudaminae        | 09-SRNP-70675       | MHMYE1459-09          | GU653537                 |
| 5481              | Urbanus proteus | Eudaminae        | 09-SRNP-44562       | MHMYE1456-09          | GU653542                 |
| 5482              | Urbanus proteus | Eudaminae        | 09-SRNP-70361       | MHMYE1457-09          | GU653539                 |
| 5483              | Urbanus proteus | Eudaminae        | 09-SRNP-70360       | MHMYE889-09           | GU653712                 |
| 5484              | Urbanus proteus | Eudaminae        | 09-SRNP-44561       | MHMYE1455-09          | GU653541                 |
| 5485              | Urbanus proteus | Eudaminae        | 09-SRNP-44385       | MHMYE866-09           | GU653734                 |
| 5486              | Urbanus proteus | Eudaminae        | 09-SRNP-44317       | MHMYE868-09           | GU653735                 |
| 5487              | Urbanus proteus | Eudaminae        | 08-SRNP-72574       | MHMX942-09            | GU666582                 |

| <b>Tree Order</b> | <b>Species</b>  | <b>Subfamily</b> | <b>ACG Sampleid</b> | <b>BOLD Processid</b> | <b>Genbank Accession</b> |
|-------------------|-----------------|------------------|---------------------|-----------------------|--------------------------|
| 5488              | Urbanus proteus | Eudaminae        | 08-SRNP-72588       | MHMXY948-09           | GU666572                 |
| 5489              | Urbanus proteus | Eudaminae        | 08-SRNP-71676       | MHMXX1182-09          | JF778582                 |
| 5490              | Urbanus proteus | Eudaminae        | 08-SRNP-71995       | MHMXX468-09           | JF750920                 |
| 5491              | Urbanus proteus | Eudaminae        | 08-SRNP-45057       | MHMXX470-09           | JF754383                 |
| 5492              | Urbanus proteus | Eudaminae        | 08-SRNP-45169       | MHMXX472-09           | JF754384                 |
| 5493              | Urbanus proteus | Eudaminae        | 08-SRNP-71277       | MHMXX467-09           | JF754381                 |
| 5494              | Urbanus proteus | Eudaminae        | 08-SRNP-1259        | MHMXX469-09           | JF754382                 |
| 5495              | Urbanus proteus | Eudaminae        | 08-SRNP-65631       | MHMXX465-09           | JF754379                 |
| 5496              | Urbanus proteus | Eudaminae        | 08-SRNP-65632       | MHMXX466-09           | JF754380                 |
| 5497              | Urbanus proteus | Eudaminae        | 08-SRNP-65633       | MHMXX463-09           | JF754377                 |
| 5498              | Urbanus proteus | Eudaminae        | 08-SRNP-65634       | MHMXX464-09           | JF754378                 |
| 5499              | Urbanus proteus | Eudaminae        | 07-SRNP-65419       | MHMXR791-08           | JF763364                 |
| 5500              | Urbanus proteus | Eudaminae        | 08-SRNP-65052       | MHMXT188-08           | JF763362                 |
| 5501              | Urbanus proteus | Eudaminae        | 07-SRNP-57891       | MHMXX0810-08          | JF763373                 |
| 5502              | Urbanus proteus | Eudaminae        | 07-SRNP-65273       | MHMXX0814-08          | JF763370                 |
| 5503              | Urbanus proteus | Eudaminae        | 07-SRNP-1369        | MHMXX305-07           | JF763385                 |
| 5504              | Urbanus proteus | Eudaminae        | 07-SRNP-56212       | MHMXX306-07           | JF763384                 |
| 5505              | Urbanus proteus | Eudaminae        | 07-SRNP-20079       | MHMXX313-07           | JF763383                 |
| 5506              | Urbanus proteus | Eudaminae        | 07-SRNP-20455       | MHMXX315-07           | JF763381                 |
| 5507              | Urbanus proteus | Eudaminae        | 02-SRNP-5760        | MHAI914-07            | GU156631                 |
| 5508              | Urbanus proteus | Eudaminae        | 02-SRNP-29402       | MHAI915-07            | GU156496                 |
| 5509              | Urbanus proteus | Eudaminae        | 07-SRNP-55788       | MHMXX287-07           | JF763379                 |
| 5510              | Urbanus proteus | Eudaminae        | 07-SRNP-56167       | MHMXX288-07           | JF763378                 |
| 5511              | Urbanus proteus | Eudaminae        | 07-SRNP-32038       | MHMXX297-07           | JF763387                 |
| 5512              | Urbanus proteus | Eudaminae        | 07-SRNP-20045       | MHMXX299-07           | JF763386                 |
| 5513              | Urbanus proteus | Eudaminae        | 02-SRNP-15127       | MHAI894-07            | GU156598                 |
| 5514              | Urbanus proteus | Eudaminae        | 02-SRNP-28881       | MHAI895-07            | GU156599                 |
| 5515              | Urbanus proteus | Eudaminae        | 02-SRNP-28760       | MHAI896-07            | GU156600                 |
| 5516              | Urbanus proteus | Eudaminae        | 97-SRNP-4472        | MHAI901-07            | GU156608                 |
| 5517              | Urbanus proteus | Eudaminae        | 02-SRNP-17913       | MHAI903-07            | GU156611                 |
| 5518              | Urbanus proteus | Eudaminae        | 02-SRNP-2958        | MHAI905-07            | GU156621                 |
| 5519              | Urbanus proteus | Eudaminae        | 01-SRNP-1274        | MHAI908-07            | GU156624                 |
| 5520              | Urbanus proteus | Eudaminae        | 02-SRNP-14208       | MHAI913-07            | GU156629                 |
| 5521              | Urbanus proteus | Eudaminae        | 02-SRNP-15153       | MHAI885-07            | GU156591                 |
| 5522              | Urbanus proteus | Eudaminae        | 01-SRNP-450         | MHAI889-07            | GU156593                 |
| 5523              | Urbanus proteus | Eudaminae        | 02-SRNP-15121       | MHAI890-07            | GU156592                 |
| 5524              | Urbanus proteus | Eudaminae        | 02-SRNP-15567       | MHAI891-07            | GU156595                 |
| 5525              | Urbanus proteus | Eudaminae        | 02-SRNP-15155       | MHAI892-07            | GU156597                 |
| 5526              | Urbanus proteus | Eudaminae        | 02-SRNP-2957        | MHAI893-07            | GU156596                 |
| 5527              | Urbanus proteus | Eudaminae        | 02-SRNP-29165       | MHAI861-07            | GU156479                 |
| 5528              | Urbanus proteus | Eudaminae        | 97-SRNP-9660        | MHAI863-07            | GU156485                 |
| 5529              | Urbanus proteus | Eudaminae        | 01-SRNP-12350       | MHAI883-07            | GU156589                 |
| 5530              | Urbanus proteus | Eudaminae        | 01-SRNP-445         | MHAI884-07            | GU156590                 |
| 5531              | Urbanus proteus | Eudaminae        | 02-SRNP-17908       | MHAI857-07            | GU156567                 |
| 5532              | Urbanus proteus | Eudaminae        | 01-SRNP-977         | MHAI858-07            | GU156568                 |
| 5533              | Urbanus proteus | Eudaminae        | 01-SRNP-451         | MHAI853-07            | GU156535                 |
| 5534              | Urbanus proteus | Eudaminae        | 01-SRNP-981         | MHAI854-07            | GU156545                 |
| 5535              | Urbanus proteus | Eudaminae        | 02-SRNP-28762       | MHAI855-07            | GU156565                 |
| 5536              | Urbanus proteus | Eudaminae        | 02-SRNP-28920       | MHAI856-07            | GU156566                 |
| 5537              | Urbanus proteus | Eudaminae        | 03-SRNP-16599       | MHAI850-07            | GU156512                 |
| 5538              | Urbanus proteus | Eudaminae        | 01-SRNP-1273        | MHAI852-07            | GU156515                 |
| 5539              | Urbanus proteus | Eudaminae        | 04-SRNP-45304       | MHAI843-07            | GU156573                 |
| 5540              | Urbanus proteus | Eudaminae        | 04-SRNP-45579       | MHAI844-07            | GU156574                 |
| 5541              | Urbanus proteus | Eudaminae        | 03-SRNP-17056       | MHAI840-07            | GU156634                 |
| 5542              | Urbanus proteus | Eudaminae        | 03-SRNP-20455       | MHAI841-07            | GU156632                 |
| 5543              | Urbanus proteus | Eudaminae        | 04-SRNP-45408       | MHAI837-07            | GU156520                 |

| <b>Tree Order</b> | <b>Species</b>     | <b>Subfamily</b> | <b>ACG Sampleid</b> | <b>BOLD Processid</b> | <b>Genbank Accession</b> |
|-------------------|--------------------|------------------|---------------------|-----------------------|--------------------------|
| 5544              | Urbanus proteus    | Eudaminae        | 03-SRNP-16784       | MHAHI839-07           | GU156633                 |
| 5545              | Urbanus proteus    | Eudaminae        | 04-SRNP-45364       | MHAHI834-07           | GU156517                 |
| 5546              | Urbanus proteus    | Eudaminae        | 04-SRNP-1039        | MHAHI836-07           | GU156522                 |
| 5547              | Urbanus proteus    | Eudaminae        | 04-SRNP-45324       | MHAHI832-07           | GU156501                 |
| 5548              | Urbanus proteus    | Eudaminae        | 04-SRNP-45365       | MHAHI833-07           | GU156521                 |
| 5549              | Urbanus proteus    | Eudaminae        | 04-SRNP-22001       | MHAHI830-07           | GU156569                 |
| 5550              | Urbanus proteus    | Eudaminae        | 04-SRNP-22021       | MHAHI831-07           | GU156500                 |
| 5551              | Urbanus proteus    | Eudaminae        | 03-SRNP-16641       | MHAHI825-07           | GU156617                 |
| 5552              | Urbanus proteus    | Eudaminae        | 03-SRNP-16603       | MHAHI827-07           | GU156616                 |
| 5553              | Urbanus proteus    | Eudaminae        | 03-SRNP-16627       | MHAHI816-07           | GU156714                 |
| 5554              | Urbanus proteus    | Eudaminae        | 03-SRNP-16620       | MHAHI819-07           | GU156638                 |
| 5555              | Urbanus proteus    | Eudaminae        | 03-SRNP-16891       | MHAHI814-07           | GU156712                 |
| 5556              | Urbanus proteus    | Eudaminae        | 03-SRNP-16640       | MHAHI815-07           | GU156713                 |
| 5557              | Urbanus proteus    | Eudaminae        | 07-SRNP-21374       | MHAHL440-07           | JF763355                 |
| 5558              | Urbanus proteus    | Eudaminae        | 07-SRNP-22165       | MHAHL444-07           | JF763356                 |
| 5559              | Urbanus proteus    | Eudaminae        | 07-SRNP-1159        | MHAHL454-07           | JF763359                 |
| 5560              | Urbanus proteus    | Eudaminae        | 07-SRNP-3075        | MHAHL457-07           | JF763360                 |
| 5561              | Urbanus proteus    | Eudaminae        | 07-SRNP-21822       | MHAHL458-07           | JF763361                 |
| 5562              | Urbanus proteus    | Eudaminae        | 07-SRNP-45406       | MHMXO804-08           | JF763376                 |
| 5563              | Urbanus proteus    | Eudaminae        | 07-SRNP-56883       | MHMXO805-08           | JF763375                 |
| 5564              | Urbanus proteus    | Eudaminae        | 07-SRNP-57878       | MHMXO809-08           | JF763374                 |
| 5565              | Urbanus proteus    | Eudaminae        | 07-SRNP-65274       | MHMXO815-08           | JF763369                 |
| 5566              | Urbanus proteus    | Eudaminae        | 07-SRNP-65275       | MHMXR790-08           | JF763365                 |
| 5567              | Urbanus proteus    | Eudaminae        | 08-SRNP-65195       | MHMXW455-09           | JF754371                 |
| 5568              | Urbanus proteus    | Eudaminae        | 08-SRNP-55985       | MHMXW456-09           | JF754372                 |
| 5569              | Urbanus proteus    | Eudaminae        | 08-SRNP-55979       | MHMXW461-09           | JF754375                 |
| 5570              | Urbanus proteus    | Eudaminae        | 08-SRNP-65630       | MHMXW462-09           | JF754376                 |
| 5571              | Urbanus proteus    | Eudaminae        | 09-SRNP-57115       | MHMYE1460-09          | GU653538                 |
| 5572              | Urbanus proteus    | Eudaminae        | 09-SRNP-75601       | MHMYG2417-10          | HM885840                 |
| 5573              | Urbanus belliDHJ02 | Eudaminae        | 04-SRNP-45491       | MHAHD559-05           | GU161969                 |
| 5574              | Urbanus belliDHJ02 | Eudaminae        | 03-SRNP-12624.1     | MHAHD551-05           | GU161974                 |
| 5575              | Urbanus belliDHJ02 | Eudaminae        | 03-SRNP-12634.1     | MHAHD566-05           | GU161972                 |
| 5576              | Urbanus belliDHJ02 | Eudaminae        | 06-SRNP-47816       | MHAHK061-07           | JF761266                 |
| 5577              | Urbanus belliDHJ02 | Eudaminae        | 07-SRNP-45071       | MHMXK293-07           | JF763317                 |
| 5578              | Urbanus belliDHJ02 | Eudaminae        | 06-SRNP-30895       | MHAHG548-06           | GU151822                 |
| 5579              | Urbanus belliDHJ02 | Eudaminae        | 95-SRNP-10572       | MHAHD438-05           | GU161964                 |
| 5580              | Urbanus belliDHJ02 | Eudaminae        | 01-SRNP-2952        | MHAHD437-05           | GU161966                 |
| 5581              | Urbanus belliDHJ02 | Eudaminae        | 01-SRNP-4475        | MHAHD434-05           | GU161965                 |
| 5582              | Urbanus belliDHJ02 | Eudaminae        | 01-SRNP-487         | MHAHC336-05           | DQ293703                 |
| 5583              | Urbanus belliDHJ02 | Eudaminae        | 06-SRNP-3621        | MHAHI030-06           | GU156387                 |
| 5584              | Urbanus belliDHJ02 | Eudaminae        | 07-SRNP-40856       | MHAHL443-07           | JF763316                 |
| 5585              | Urbanus belliDHJ02 | Eudaminae        | 06-SRNP-47814       | MHAHK071-07           | JF761269                 |
| 5586              | Urbanus belliDHJ02 | Eudaminae        | 06-SRNP-30896       | MHAHG573-06           | GU151820                 |
| 5587              | Urbanus belliDHJ02 | Eudaminae        | 06-SRNP-46174       | MHAHJ743-07           | JF753231                 |
| 5588              | Urbanus belliDHJ02 | Eudaminae        | 06-SRNP-46171       | MHAHJ899-07           | JF753233                 |
| 5589              | Urbanus belliDHJ02 | Eudaminae        | 06-SRNP-57638       | MHAHI045-06           | GU156385                 |
| 5590              | Urbanus belliDHJ02 | Eudaminae        | 02-SRNP-1417        | MHAHD432-05           | GU161961                 |
| 5591              | Urbanus belliDHJ02 | Eudaminae        | 04-SRNP-45586       | MHAHD704-05           | GU161968                 |
| 5592              | Urbanus belliDHJ02 | Eudaminae        | 95-SRNP-6826        | MHAHD409-05           | GU161963                 |
| 5593              | Urbanus belliDHJ02 | Eudaminae        | 02-SRNP-954         | MHAHD431-05           | GU161962                 |
| 5594              | Urbanus belliDHJ02 | Eudaminae        | 04-SRNP-14877       | MHAHC407-05           | DQ293706                 |
| 5595              | Urbanus belliDHJ02 | Eudaminae        | 04-SRNP-49377       | MHAHC411-05           | DQ293707                 |
| 5596              | Urbanus belliDHJ02 | Eudaminae        | 04-SRNP-15474       | MHAHC395-05           | DQ293704                 |
| 5597              | Urbanus belliDHJ02 | Eudaminae        | 04-SRNP-15145       | MHAHC404-05           | DQ293705                 |
| 5598              | Urbanus belliDHJ02 | Eudaminae        | 04-SRNP-48357       | MHAHC294-05           | DQ293702                 |
| 5599              | Urbanus belliDHJ02 | Eudaminae        | 04-SRNP-47954       | MHAHC288-05           | DQ293701                 |

| <b>Tree Order</b> | <b>Species</b>     | <b>Subfamily</b> | <b>ACG Sampleid</b> | <b>BOLD Processid</b> | <b>Genbank Accession</b> |
|-------------------|--------------------|------------------|---------------------|-----------------------|--------------------------|
| 5600              | Urbanus bellidHJ02 | Eudaminae        | 04-SRNP-14569       | MHAHC279-05           | DQ293700                 |
| 5601              | Urbanus bellidHJ02 | Eudaminae        | 02-SRNP-32172       | MHAHC208-05           | DQ293697                 |
| 5602              | Urbanus bellidHJ02 | Eudaminae        | 02-SRNP-392         | MHAHC217-05           | DQ293698                 |
| 5603              | Urbanus bellidHJ02 | Eudaminae        | 02-SRNP-166         | MHAHC239-05           | DQ293699                 |
| 5604              | Urbanus bellidHJ02 | Eudaminae        | 04-SRNP-20968       | MHAHC039-05           | DQ293696                 |
| 5605              | Urbanus bellidHJ02 | Eudaminae        | 04-SRNP-20876       | MHAHC016-05           | DQ293695                 |
| 5606              | Urbanus bellidHJ02 | Eudaminae        | 05-SRNP-59447       | MHAHF877-06           | GU150970                 |
| 5607              | Urbanus bellidHJ02 | Eudaminae        | 06-SRNP-47801       | MHAHK064-07           | JF761267                 |
| 5608              | Urbanus bellidHJ02 | Eudaminae        | 02-SRNP-1026        | MHAHD436-05           | GU161967                 |
| 5609              | Urbanus bellidHJ02 | Eudaminae        | 03-SRNP-12592       | MHAHD567-05           | GU161973                 |
| 5610              | Urbanus bellidHJ02 | Eudaminae        | 06-SRNP-46184       | MHAHJ898-07           | JF753232                 |
| 5611              | Urbanus bellidHJ02 | Eudaminae        | 07-SRNP-55283       | MHMXXK298-07          | JF763318                 |
| 5612              | Urbanus bellidHJ02 | Eudaminae        | 04-SRNP-45494       | MHAHD562-05           | GU161971                 |
| 5613              | Urbanus bellidHJ02 | Eudaminae        | 05-SRNP-1832        | MHAHF876-06           | GU150969                 |
| 5614              | Urbanus bellidHJ02 | Eudaminae        | 05-SRNP-47043       | MHAHF884-06           | GU150973                 |
| 5615              | Urbanus bellidHJ02 | Eudaminae        | 05-SRNP-47231       | MHAHF886-06           | GU150974                 |
| 5616              | Urbanus bellidHJ02 | Eudaminae        | 06-SRNP-2662        | MHAHG569-06           | GU151821                 |
| 5617              | Urbanus bellidHJ02 | Eudaminae        | 05-SRNP-19630       | MHAHG597-06           | GU151818                 |
| 5618              | Urbanus bellidHJ02 | Eudaminae        | 05-SRNP-59448       | MHAHF879-06           | GU150971                 |
| 5619              | Urbanus bellidHJ02 | Eudaminae        | 05-SRNP-59444       | MHAHF880-06           | GU150972                 |
| 5620              | Urbanus bellidHJ02 | Eudaminae        | 04-SRNP-45492       | MHAHD550-05           | GU161975                 |
| 5621              | Urbanus bellidHJ02 | Eudaminae        | 03-SRNP-29774       | MHAHD558-05           | GU161970                 |
| 5622              | Urbanus bellidHJ02 | Eudaminae        | 06-SRNP-2658        | MHAHG599-06           | GU151819                 |
| 5623              | Urbanus bellidHJ02 | Eudaminae        | 06-SRNP-46172       | MHAHI037-06           | GU156386                 |
| 5624              | Urbanus bellidHJ02 | Eudaminae        | 06-SRNP-46486       | MHAHJ629-07           | JF753227                 |
| 5625              | Urbanus bellidHJ02 | Eudaminae        | 06-SRNP-46572       | MHAHJ635-07           | JF750898                 |
| 5626              | Urbanus bellidHJ02 | Eudaminae        | 06-SRNP-46179       | MHAHJ640-07           | JF753228                 |
| 5627              | Urbanus bellidHJ02 | Eudaminae        | 06-SRNP-46315       | MHAHJ641-07           | JF753229                 |
| 5628              | Urbanus bellidHJ02 | Eudaminae        | 06-SRNP-6511        | MHAHJ738-07           | JF753230                 |
| 5629              | Urbanus bellidHJ02 | Eudaminae        | 06-SRNP-46639       | MHAHJ896-07           | JF750897                 |
| 5630              | Urbanus bellidHJ02 | Eudaminae        | 06-SRNP-46460       | MHAHJ904-07           | JF753234                 |
| 5631              | Urbanus bellidHJ02 | Eudaminae        | 06-SRNP-47817       | MHAHK065-07           | JF761268                 |
| 5632              | Urbanus bellidHJ02 | Eudaminae        | 07-SRNP-40676       | MHMXXK281-07          | JF750902                 |
| 5633              | Urbanus bellidHJ02 | Eudaminae        | 07-SRNP-30613       | MHMXXK286-07          | JF750903                 |
| 5634              | Urbanus bellidHJ02 | Eudaminae        | 07-SRNP-56829       | MHMXXK291-07          | JF750904                 |
| 5635              | Urbanus bellidHJ02 | Eudaminae        | 07-SRNP-56547       | MHMXXK296-07          | JF750905                 |
| 5636              | Urbanus bellidHJ02 | Eudaminae        | 07-SRNP-30615       | MHMXXK302-07          | JF750899                 |
| 5637              | Urbanus bellidHJ02 | Eudaminae        | 07-SRNP-20318       | MHMXXK311-07          | JF750900                 |
| 5638              | Urbanus bellidHJ02 | Eudaminae        | 06-SRNP-18276       | MHMXXK317-07          | JF750901                 |
| 5639              | Urbanus bellidHJ02 | Eudaminae        | 07-SRNP-57868       | MHMXXO821-08          | JF750906                 |
| 5640              | Urbanus bellidHJ02 | Eudaminae        | 08-SRNP-31826       | MHMXY949-09           | GU666573                 |
| 5641              | Urbanus viterboana | Eudaminae        | 03-SRNP-23514       | CSRII587-05           | DQ293844                 |
| 5642              | Urbanus viterboana | Eudaminae        | 01-SRNP-21478       | MHAHC321-05           | DQ293847                 |
| 5643              | Urbanus viterboana | Eudaminae        | 01-SRNP-21220       | MHAHC333-05           | DQ293848                 |
| 5644              | Urbanus viterboana | Eudaminae        | 99-SRNP-363         | MHAHD404-05           | GU162019                 |
| 5645              | Urbanus viterboana | Eudaminae        | 03-SRNP-23516       | MHAHD563-05           | GU162018                 |
| 5646              | Urbanus viterboana | Eudaminae        | 06-SRNP-35186       | MHAHH537-06           | GU155719                 |
| 5647              | Urbanus viterboana | Eudaminae        | 05-SRNP-35999       | MHAHG594-06           | GU151882                 |
| 5648              | Urbanus viterboana | Eudaminae        | 01-SRNP-21475       | MHAHC334-05           | DQ293849                 |
| 5649              | Urbanus viterboana | Eudaminae        | 01-SRNP-21228       | MHAHC320-05           | DQ293846                 |
| 5650              | Urbanus viterboana | Eudaminae        | 01-SRNP-21233       | MHAHC319-05           | DQ293845                 |
| 5651              | Urbanus viterboana | Eudaminae        | 01-SRNP-21223       | MHAHC339-05           | DQ293850                 |
| 5652              | Urbanus viterboana | Eudaminae        | 99-SRNP-366         | MHAHD403-05           | GU162020                 |
| 5653              | Urbanus viterboana | Eudaminae        | 05-SRNP-35553       | MHAHF882-06           | GU151027                 |
| 5654              | Urbanus viterboana | Eudaminae        | 06-SRNP-35190       | MHAHI039-06           | GU156715                 |
| 5655              | Urbanus viterboana | Eudaminae        | 07-SRNP-35463       | MHMXXK309-07          | JF763396                 |

| <b>Tree Order</b> | <b>Species</b>     | <b>Subfamily</b> | <b>ACG Sampleid</b> | <b>BOLD Processid</b> | <b>Genbank Accession</b> |
|-------------------|--------------------|------------------|---------------------|-----------------------|--------------------------|
| 5656              | Urbanus viterboana | Eudaminae        | 07-SRNP-35538       | MHMXN253-07           | JF763395                 |
| 5657              | Urbanus viterboana | Eudaminae        | 08-SRNP-35218       | MHMXW471-09           | JF754385                 |
| 5658              | Urbanus bellidHJ03 | Eudaminae        | 03-SRNP-12654.1     | MHAHD555-05           | GU161977                 |
| 5659              | Urbanus bellidHJ03 | Eudaminae        | 06-SRNP-31264       | MHAHG558-06           | GU151824                 |
| 5660              | Urbanus bellidHJ03 | Eudaminae        | 07-SRNP-1121        | MHMXK279-07           | JF763320                 |
| 5661              | Urbanus bellidHJ03 | Eudaminae        | 07-SRNP-1122        | MHMXK280-07           | JF763319                 |
| 5662              | Urbanus bellidHJ03 | Eudaminae        | 06-SRNP-65065       | MHAHJ787-07           | JF750907                 |
| 5663              | Urbanus bellidHJ03 | Eudaminae        | 07-SRNP-33182       | MHMXR784-08           | JF750911                 |
| 5664              | Urbanus bellidHJ03 | Eudaminae        | 08-SRNP-65993       | MHMXY953-09           | GU666567                 |
| 5665              | Urbanus bellidHJ03 | Eudaminae        | 08-SRNP-66028       | MHMXY944-09           | GU666576                 |
| 5666              | Urbanus bellidHJ03 | Eudaminae        | 07-SRNP-33183       | MHMXR787-08           | JF750912                 |
| 5667              | Urbanus bellidHJ03 | Eudaminae        | 07-SRNP-33184       | MHMXR782-08           | JF750910                 |
| 5668              | Urbanus bellidHJ03 | Eudaminae        | 07-SRNP-287         | MHMXK303-07           | JF750908                 |
| 5669              | Urbanus bellidHJ03 | Eudaminae        | 07-SRNP-40761       | MHMXK282-07           | JF750909                 |
| 5670              | Urbanus bellidHJ03 | Eudaminae        | 06-SRNP-46887       | MHAHJ902-07           | JF753237                 |
| 5671              | Urbanus bellidHJ03 | Eudaminae        | 06-SRNP-7473        | MHAHJ740-07           | JF753236                 |
| 5672              | Urbanus bellidHJ03 | Eudaminae        | 06-SRNP-46891       | MHAHJ633-07           | JF753235                 |
| 5673              | Urbanus bellidHJ03 | Eudaminae        | 05-SRNP-7209        | MHAHG593-06           | GU151823                 |
| 5674              | Urbanus bellidHJ03 | Eudaminae        | 05-SRNP-40545       | MHAHF885-06           | GU150976                 |
| 5675              | Urbanus bellidHJ03 | Eudaminae        | 05-SRNP-41753       | MHAHF878-06           | GU150975                 |
| 5676              | Urbanus bellidHJ03 | Eudaminae        | 03-SRNP-12629.1     | MHAHD568-05           | GU161982                 |
| 5677              | Urbanus bellidHJ03 | Eudaminae        | 03-SRNP-10927       | MHAHD565-05           | GU161980                 |
| 5678              | Urbanus bellidHJ03 | Eudaminae        | 03-SRNP-12109.1     | MHAHD564-05           | GU161981                 |
| 5679              | Urbanus bellidHJ03 | Eudaminae        | 03-SRNP-10327       | MHAHD554-05           | GU161979                 |
| 5680              | Urbanus bellidHJ03 | Eudaminae        | 03-SRNP-12655.1     | MHAHD552-05           | GU161983                 |
| 5681              | Urbanus bellidHJ03 | Eudaminae        | 99-SRNP-5541        | MHAHD423-05           | GU161976                 |
| 5682              | Urbanus bellidHJ03 | Eudaminae        | 01-SRNP-23227       | MHAHD931-05           | GU161978                 |
| 5683              | Urbanus bellidHJ03 | Eudaminae        | 04-SRNP-42794       | MHAHC700-05           | DQ293712                 |
| 5684              | Urbanus bellidHJ03 | Eudaminae        | 01-SRNP-22184       | MHAHC329-05           | DQ293711                 |
| 5685              | Urbanus bellidHJ03 | Eudaminae        | 01-SRNP-23228       | MHAHC345-05           | DQ293708                 |
| 5686              | Urbanus bellidHJ03 | Eudaminae        | 01-SRNP-2104        | MHAHC323-05           | DQ293710                 |
| 5687              | Urbanus bellidHJ03 | Eudaminae        | 02-SRNP-7163        | MHAHC237-05           | DQ293709                 |
| 5688              | Urbanus bellidHJ03 | Eudaminae        | 05-SRNP-42394       | MHAHF889-06           | GU150977                 |
| 5689              | Urbanus bellidHJ03 | Eudaminae        | 06-SRNP-43129       | MHAHI467-06           | GU156388                 |
| 5690              | Urbanus bellidHJ03 | Eudaminae        | 09-SRNP-57089       | MHMYE1572-09          | HM391132                 |
| 5691              | Urbanus bellidHJ01 | Eudaminae        | 04-SRNP-49713       | MHAHC702-05           | DQ293689                 |
| 5692              | Urbanus bellidHJ01 | Eudaminae        | 04-SRNP-49711       | MHAHC703-05           | DQ293690                 |
| 5693              | Urbanus bellidHJ01 | Eudaminae        | 05-SRNP-49623       | MHAHG329-06           | GU151811                 |
| 5694              | Urbanus bellidHJ01 | Eudaminae        | 01-SRNP-22185       | MHAHD440-05           | GU161945                 |
| 5695              | Urbanus bellidHJ01 | Eudaminae        | 05-SRNP-43429       | MHAHG590-06           | GU151806                 |
| 5696              | Urbanus bellidHJ01 | Eudaminae        | 06-SRNP-31091       | MHAHG604-06           | GU151810                 |
| 5697              | Urbanus bellidHJ01 | Eudaminae        | 06-SRNP-46459       | MHAHJ900-07           | JF753224                 |
| 5698              | Urbanus bellidHJ01 | Eudaminae        | 06-SRNP-19690       | MHAHK063-07           | JF761261                 |
| 5699              | Urbanus bellidHJ01 | Eudaminae        | 07-SRNP-1053        | MHMXK277-07           | JF763312                 |
| 5700              | Urbanus bellidHJ01 | Eudaminae        | 06-SRNP-47304       | MHAHJ631-07           | JF753214                 |
| 5701              | Urbanus bellidHJ01 | Eudaminae        | 07-SRNP-23883       | MHMXT186-08           | JF763303                 |
| 5702              | Urbanus bellidHJ01 | Eudaminae        | 06-SRNP-46173       | MHAHI038-06           | GU156382                 |
| 5703              | Urbanus bellidHJ01 | Eudaminae        | 06-SRNP-48039       | MHAHK068-07           | JF761263                 |
| 5704              | Urbanus bellidHJ01 | Eudaminae        | 98-SRNP-4170        | MHAHD418-05           | GU161937                 |
| 5705              | Urbanus bellidHJ01 | Eudaminae        | 05-SRNP-47230       | MHAHF887-06           | GU150966                 |
| 5706              | Urbanus bellidHJ01 | Eudaminae        | 05-SRNP-42614       | MHAHF888-06           | GU150964                 |
| 5707              | Urbanus bellidHJ01 | Eudaminae        | 07-SRNP-45068       | MHMXK292-07           | JF763307                 |
| 5708              | Urbanus bellidHJ01 | Eudaminae        | 06-SRNP-47295       | MHAHJ630-07           | JF753213                 |
| 5709              | Urbanus bellidHJ01 | Eudaminae        | 06-SRNP-31265       | MHAHH547-06           | GU155697                 |
| 5710              | Urbanus bellidHJ01 | Eudaminae        | 05-SRNP-60977       | MHAHG596-06           | GU151807                 |
| 5711              | Urbanus bellidHJ01 | Eudaminae        | 05-SRNP-42873       | MHAHG591-06           | GU151803                 |

| <b>Tree Order</b> | <b>Species</b>     | <b>Subfamily</b> | <b>ACG Sampleid</b> | <b>BOLD Processid</b> | <b>Genbank Accession</b> |
|-------------------|--------------------|------------------|---------------------|-----------------------|--------------------------|
| 5712              | Urbanus bellidHJ01 | Eudaminae        | 06-SRNP-40907       | MHAHG562-06           | GU151817                 |
| 5713              | Urbanus bellidHJ01 | Eudaminae        | 07-SRNP-20462       | MHM XR786-08          | JF763304                 |
| 5714              | Urbanus bellidHJ01 | Eudaminae        | 96-SRNP-11569       | MHAHD414-05           | GU161933                 |
| 5715              | Urbanus bellidHJ01 | Eudaminae        | 07-SRNP-41187       | MHAHL453-07           | JF763302                 |
| 5716              | Urbanus bellidHJ01 | Eudaminae        | 08-SRNP-1439        | MHMXW458-09           | JF750891                 |
| 5717              | Urbanus bellidHJ01 | Eudaminae        | 08-SRNP-65153       | MHMXW457-09           | JF750892                 |
| 5718              | Urbanus bellidHJ01 | Eudaminae        | 07-SRNP-65582       | MHMXR785-08           | JF750894                 |
| 5719              | Urbanus bellidHJ01 | Eudaminae        | 07-SRNP-33232       | MHMXR783-08           | JF750893                 |
| 5720              | Urbanus bellidHJ01 | Eudaminae        | 07-SRNP-1119        | MHMXO819-08           | JF750896                 |
| 5721              | Urbanus bellidHJ01 | Eudaminae        | 07-SRNP-42421       | MHMXO808-08           | JF750895                 |
| 5722              | Urbanus bellidHJ01 | Eudaminae        | 07-SRNP-42423       | MHMXO807-08           | JF763306                 |
| 5723              | Urbanus bellidHJ01 | Eudaminae        | 07-SRNP-31148       | MHAHL452-07           | JF763301                 |
| 5724              | Urbanus bellidHJ01 | Eudaminae        | 07-SRNP-31150       | MHAHL451-07           | JF763300                 |
| 5725              | Urbanus bellidHJ01 | Eudaminae        | 07-SRNP-20874       | MHAHL446-07           | JF763299                 |
| 5726              | Urbanus bellidHJ01 | Eudaminae        | 07-SRNP-31149       | MHAHL442-07           | JF763298                 |
| 5727              | Urbanus bellidHJ01 | Eudaminae        | 07-SRNP-20875       | MHAHL441-07           | JF763297                 |
| 5728              | Urbanus bellidHJ01 | Eudaminae        | 07-SRNP-30807       | MHM XK304-07          | JF763314                 |
| 5729              | Urbanus bellidHJ01 | Eudaminae        | 07-SRNP-30614       | MHM XK301-07          | JF763315                 |
| 5730              | Urbanus bellidHJ01 | Eudaminae        | 07-SRNP-45090       | MHM XK290-07          | JF763308                 |
| 5731              | Urbanus bellidHJ01 | Eudaminae        | 07-SRNP-45088       | MHM XK285-07          | JF763309                 |
| 5732              | Urbanus bellidHJ01 | Eudaminae        | 07-SRNP-40762       | MHM XK283-07          | JF763310                 |
| 5733              | Urbanus bellidHJ01 | Eudaminae        | 07-SRNP-30617       | MHM XK278-07          | JF763311                 |
| 5734              | Urbanus bellidHJ01 | Eudaminae        | 06-SRNP-60091       | MHAHK070-07           | JF761265                 |
| 5735              | Urbanus bellidHJ01 | Eudaminae        | 06-SRNP-47955       | MHAHK069-07           | JF761264                 |
| 5736              | Urbanus bellidHJ01 | Eudaminae        | 06-SRNP-59197       | MHAHK066-07           | JF761262                 |
| 5737              | Urbanus bellidHJ01 | Eudaminae        | 06-SRNP-46570       | MHAHJ903-07           | JF753226                 |
| 5738              | Urbanus bellidHJ01 | Eudaminae        | 06-SRNP-46180       | MHAHJ901-07           | JF753225                 |
| 5739              | Urbanus bellidHJ01 | Eudaminae        | 06-SRNP-46176       | MHAHJ897-07           | JF753223                 |
| 5740              | Urbanus bellidHJ01 | Eudaminae        | 06-SRNP-47233       | MHAHJ895-07           | JF753222                 |
| 5741              | Urbanus bellidHJ01 | Eudaminae        | 06-SRNP-7474        | MHAHJ745-07           | JF753221                 |
| 5742              | Urbanus bellidHJ01 | Eudaminae        | 06-SRNP-6164        | MHAHJ737-07           | JF753220                 |
| 5743              | Urbanus bellidHJ01 | Eudaminae        | 06-SRNP-46703       | MHAHJ642-07           | JF753219                 |
| 5744              | Urbanus bellidHJ01 | Eudaminae        | 06-SRNP-7378        | MHAHJ639-07           | JF753218                 |
| 5745              | Urbanus bellidHJ01 | Eudaminae        | 06-SRNP-46183       | MHAHJ637-07           | JF753217                 |
| 5746              | Urbanus bellidHJ01 | Eudaminae        | 06-SRNP-46487       | MHAHJ636-07           | JF753216                 |
| 5747              | Urbanus bellidHJ01 | Eudaminae        | 06-SRNP-46333       | MHAHJ634-07           | JF753215                 |
| 5748              | Urbanus bellidHJ01 | Eudaminae        | 06-SRNP-43281       | MHAHI468-06           | GU156381                 |
| 5749              | Urbanus bellidHJ01 | Eudaminae        | 06-SRNP-32923       | MHAHI466-06           | GU156380                 |
| 5750              | Urbanus bellidHJ01 | Eudaminae        | 06-SRNP-46181       | MHAHI035-06           | GU156383                 |
| 5751              | Urbanus bellidHJ01 | Eudaminae        | 06-SRNP-5512        | MHAHI029-06           | GU156384                 |
| 5752              | Urbanus bellidHJ01 | Eudaminae        | 06-SRNP-30699       | MHAHG605-06           | GU151809                 |
| 5753              | Urbanus bellidHJ01 | Eudaminae        | 06-SRNP-3004        | MHAHG602-06           | GU151804                 |
| 5754              | Urbanus bellidHJ01 | Eudaminae        | 06-SRNP-2656        | MHAHG600-06           | GU151808                 |
| 5755              | Urbanus bellidHJ01 | Eudaminae        | 05-SRNP-43001       | MHAHG587-06           | GU151805                 |
| 5756              | Urbanus bellidHJ01 | Eudaminae        | 06-SRNP-40981       | MHAHG549-06           | GU151816                 |
| 5757              | Urbanus bellidHJ01 | Eudaminae        | 06-SRNP-2074        | MHAHG547-06           | GU151815                 |
| 5758              | Urbanus bellidHJ01 | Eudaminae        | 06-SRNP-2199        | MHAHG544-06           | GU151813                 |
| 5759              | Urbanus bellidHJ01 | Eudaminae        | 06-SRNP-30737       | MHAHG542-06           | GU151814                 |
| 5760              | Urbanus bellidHJ01 | Eudaminae        | 05-SRNP-40888       | MHAHF927-06           | GU150968                 |
| 5761              | Urbanus bellidHJ01 | Eudaminae        | 05-SRNP-45196       | MHAHF919-06           | GU150958                 |
| 5762              | Urbanus bellidHJ01 | Eudaminae        | 05-SRNP-42399       | MHAHF900-06           | GU150967                 |
| 5763              | Urbanus bellidHJ01 | Eudaminae        | 05-SRNP-40898       | MHAHF897-06           | GU150959                 |
| 5764              | Urbanus bellidHJ01 | Eudaminae        | 05-SRNP-47058       | MHAHF892-06           | GU150960                 |
| 5765              | Urbanus bellidHJ01 | Eudaminae        | 05-SRNP-42700       | MHAHF891-06           | GU150965                 |
| 5766              | Urbanus bellidHJ01 | Eudaminae        | 05-SRNP-47229       | MHAHF890-06           | GU150963                 |
| 5767              | Urbanus bellidHJ01 | Eudaminae        | 05-SRNP-20694       | MHAHF883-06           | GU150961                 |

| <b>Tree Order</b> | <b>Species</b>     | <b>Subfamily</b> | <b>ACG Sampleid</b> | <b>BOLD Processid</b> | <b>Genbank Accession</b> |
|-------------------|--------------------|------------------|---------------------|-----------------------|--------------------------|
| 5768              | Urbanus bellidHJ01 | Eudaminae        | 05-SRNP-47232       | MHAHF881-06           | GU150962                 |
| 5769              | Urbanus bellidHJ01 | Eudaminae        | 04-SRNP-4302        | MHAHE156-05           | GU150133                 |
| 5770              | Urbanus bellidHJ01 | Eudaminae        | 04-SRNP-21913       | MHAHD576-05           | GU161932                 |
| 5771              | Urbanus bellidHJ01 | Eudaminae        | 03-SRNP-12633.1     | MHAHD575-05           | GU161958                 |
| 5772              | Urbanus bellidHJ01 | Eudaminae        | 03-SRNP-12657.1     | MHAHD574-05           | GU161951                 |
| 5773              | Urbanus bellidHJ01 | Eudaminae        | 03-SRNP-12627.1     | MHAHD573-05           | GU161947                 |
| 5774              | Urbanus bellidHJ01 | Eudaminae        | 03-SRNP-12947.1     | MHAHD572-05           | GU161957                 |
| 5775              | Urbanus bellidHJ01 | Eudaminae        | 03-SRNP-11566       | MHAHD571-05           | GU161931                 |
| 5776              | Urbanus bellidHJ01 | Eudaminae        | 03-SRNP-12345.1     | MHAHD570-05           | GU161956                 |
| 5777              | Urbanus bellidHJ01 | Eudaminae        | 03-SRNP-10529       | MHAHD569-05           | GU161948                 |
| 5778              | Urbanus bellidHJ01 | Eudaminae        | 03-SRNP-12298.1     | MHAHD560-05           | GU161954                 |
| 5779              | Urbanus bellidHJ01 | Eudaminae        | 03-SRNP-11211       | MHAHD557-05           | GU161949                 |
| 5780              | Urbanus bellidHJ01 | Eudaminae        | 04-SRNP-21912       | MHAHD556-05           | GU161955                 |
| 5781              | Urbanus bellidHJ01 | Eudaminae        | 01-SRNP-23117       | MHAHD439-05           | GU161946                 |
| 5782              | Urbanus bellidHJ01 | Eudaminae        | 02-SRNP-7107        | MHAHD429-05           | GU161942                 |
| 5783              | Urbanus bellidHJ01 | Eudaminae        | 01-SRNP-1028        | MHAHD428-05           | GU161943                 |
| 5784              | Urbanus bellidHJ01 | Eudaminae        | 01-SRNP-22505       | MHAHD427-05           | GU161944                 |
| 5785              | Urbanus bellidHJ01 | Eudaminae        | 00-SRNP-22025       | MHAHD426-05           | GU161941                 |
| 5786              | Urbanus bellidHJ01 | Eudaminae        | 99-SRNP-2440        | MHAHD425-05           | GU161938                 |
| 5787              | Urbanus bellidHJ01 | Eudaminae        | 02-SRNP-590         | MHAHD424-05           | GU161940                 |
| 5788              | Urbanus bellidHJ01 | Eudaminae        | 02-SRNP-7734        | MHAHD422-05           | GU161939                 |
| 5789              | Urbanus bellidHJ01 | Eudaminae        | 01-SRNP-5700        | MHAHD421-05           | GU161953                 |
| 5790              | Urbanus bellidHJ01 | Eudaminae        | 00-SRNP-1534        | MHAHD417-05           | GU161930                 |
| 5791              | Urbanus bellidHJ01 | Eudaminae        | 00-SRNP-2200        | MHAHD416-05           | GU161936                 |
| 5792              | Urbanus bellidHJ01 | Eudaminae        | 00-SRNP-22026       | MHAHD413-05           | GU161934                 |
| 5793              | Urbanus bellidHJ01 | Eudaminae        | 02-SRNP-12992       | MHAHD410-05           | GU161952                 |
| 5794              | Urbanus bellidHJ01 | Eudaminae        | 04-SRNP-49712       | MHAHC707-05           | DQ293694                 |
| 5795              | Urbanus bellidHJ01 | Eudaminae        | 04-SRNP-49960       | MHAHC706-05           | DQ293693                 |
| 5796              | Urbanus bellidHJ01 | Eudaminae        | 04-SRNP-49714       | MHAHC705-05           | DQ293692                 |
| 5797              | Urbanus bellidHJ01 | Eudaminae        | 04-SRNP-49963       | MHAHC704-05           | DQ293691                 |
| 5798              | Urbanus bellidHJ01 | Eudaminae        | 04-SRNP-41942       | MHAHC699-05           | DQ293688                 |
| 5799              | Urbanus bellidHJ01 | Eudaminae        | 04-SRNP-15157       | MHAHC410-05           | DQ293687                 |
| 5800              | Urbanus bellidHJ01 | Eudaminae        | 04-SRNP-15160       | MHAHC409-05           | DQ293686                 |
| 5801              | Urbanus bellidHJ01 | Eudaminae        | 04-SRNP-15153       | MHAHC406-05           | DQ293685                 |
| 5802              | Urbanus bellidHJ01 | Eudaminae        | 04-SRNP-15679       | MHAHC405-05           | DQ293684                 |
| 5803              | Urbanus bellidHJ01 | Eudaminae        | 04-SRNP-15149       | MHAHC403-05           | DQ293683                 |
| 5804              | Urbanus bellidHJ01 | Eudaminae        | 04-SRNP-15189       | MHAHC402-05           | DQ293682                 |
| 5805              | Urbanus bellidHJ01 | Eudaminae        | 04-SRNP-15161       | MHAHC401-05           | DQ293681                 |
| 5806              | Urbanus bellidHJ01 | Eudaminae        | 04-SRNP-15155       | MHAHC399-05           | DQ293680                 |
| 5807              | Urbanus bellidHJ01 | Eudaminae        | 04-SRNP-15147       | MHAHC397-05           | DQ293679                 |
| 5808              | Urbanus bellidHJ01 | Eudaminae        | 04-SRNP-15146       | MHAHC396-05           | DQ293678                 |
| 5809              | Urbanus bellidHJ01 | Eudaminae        | 04-SRNP-15154       | MHAHC394-05           | DQ293677                 |
| 5810              | Urbanus bellidHJ01 | Eudaminae        | 04-SRNP-15137       | MHAHC392-05           | DQ293676                 |
| 5811              | Urbanus bellidHJ01 | Eudaminae        | 04-SRNP-15162       | MHAHC391-05           | DQ293675                 |
| 5812              | Urbanus bellidHJ01 | Eudaminae        | 04-SRNP-15150       | MHAHC390-05           | DQ293674                 |
| 5813              | Urbanus bellidHJ01 | Eudaminae        | 04-SRNP-15674       | MHAHC389-05           | DQ293673                 |
| 5814              | Urbanus bellidHJ01 | Eudaminae        | 04-SRNP-15680       | MHAHC388-05           | DQ293672                 |
| 5815              | Urbanus bellidHJ01 | Eudaminae        | 04-SRNP-15677       | MHAHC387-05           | DQ293671                 |
| 5816              | Urbanus bellidHJ01 | Eudaminae        | 04-SRNP-48641       | MHAHC210-05           | DQ293643                 |
| 5817              | Urbanus bellidHJ01 | Eudaminae        | 04-SRNP-48028       | MHAHC306-05           | DQ293664                 |
| 5818              | Urbanus bellidHJ01 | Eudaminae        | 04-SRNP-48033       | MHAHC298-05           | DQ293659                 |
| 5819              | Urbanus bellidHJ01 | Eudaminae        | 04-SRNP-47563       | MHAHC290-05           | DQ293656                 |
| 5820              | Urbanus bellidHJ01 | Eudaminae        | 04-SRNP-14307       | MHAHC286-05           | DQ293654                 |
| 5821              | Urbanus bellidHJ01 | Eudaminae        | 04-SRNP-14390       | MHAHC284-05           | DQ293653                 |
| 5822              | Urbanus bellidHJ01 | Eudaminae        | 04-SRNP-14389       | MHAHC310-05           | DQ293666                 |
| 5823              | Urbanus bellidHJ01 | Eudaminae        | 04-SRNP-41681       | MHAHC307-05           | DQ293665                 |



| <b>Tree Order</b> | <b>Species</b>     | <b>Subfamily</b> | <b>ACG Sampleid</b> | <b>BOLD Processid</b> | <b>Genbank Accession</b> |
|-------------------|--------------------|------------------|---------------------|-----------------------|--------------------------|
| 5824              | Urbanus bellidHJ01 | Eudaminae        | 04-SRNP-41680       | MHAHC299-05           | DQ293660                 |
| 5825              | Urbanus bellidHJ01 | Eudaminae        | 04-SRNP-48639       | MHAHC291-05           | DQ293657                 |
| 5826              | Urbanus bellidHJ01 | Eudaminae        | 04-SRNP-47956       | MHAHC283-05           | DQ293652                 |
| 5827              | Urbanus bellidHJ01 | Eudaminae        | 04-SRNP-47824       | MHAHC292-05           | DQ293658                 |
| 5828              | Urbanus bellidHJ01 | Eudaminae        | 04-SRNP-14108       | MHAHC300-05           | DQ293661                 |
| 5829              | Urbanus bellidHJ01 | Eudaminae        | 01-SRNP-5310        | MHAHC349-05           | DQ293670                 |
| 5830              | Urbanus bellidHJ01 | Eudaminae        | 01-SRNP-5311        | MHAHC348-05           | DQ293669                 |
| 5831              | Urbanus bellidHJ01 | Eudaminae        | 01-SRNP-3745        | MHAHC344-05           | DQ293668                 |
| 5832              | Urbanus bellidHJ01 | Eudaminae        | 01-SRNP-3404        | MHAHC342-05           | DQ293632                 |
| 5833              | Urbanus bellidHJ01 | Eudaminae        | 01-SRNP-23060       | MHAHC322-05           | DQ293667                 |
| 5834              | Urbanus bellidHJ01 | Eudaminae        | 02-SRNP-13670       | MHAHC228-05           | DQ293646                 |
| 5835              | Urbanus bellidHJ01 | Eudaminae        | 02-SRNP-2246        | MHAHC238-05           | DQ293648                 |
| 5836              | Urbanus bellidHJ01 | Eudaminae        | 02-SRNP-28991       | MHAHC240-05           | DQ293649                 |
| 5837              | Urbanus bellidHJ01 | Eudaminae        | 02-SRNP-32169       | MHAHC232-05           | DQ293647                 |
| 5838              | Urbanus bellidHJ01 | Eudaminae        | 02-SRNP-11533       | MHAHC224-05           | DQ293645                 |
| 5839              | Urbanus bellidHJ01 | Eudaminae        | 02-SRNP-13111       | MHAHC216-05           | DQ293644                 |
| 5840              | Urbanus bellidHJ01 | Eudaminae        | 02-SRNP-1028        | MHAHC200-05           | DQ293642                 |
| 5841              | Urbanus bellidHJ01 | Eudaminae        | 02-SRNP-13671       | MHAHC192-05           | DQ293641                 |
| 5842              | Urbanus bellidHJ01 | Eudaminae        | 02-SRNP-163         | MHAHC241-05           | DQ293650                 |
| 5843              | Urbanus bellidHJ01 | Eudaminae        | 04-SRNP-33067       | MHAHC078-05           | DQ293640                 |
| 5844              | Urbanus bellidHJ01 | Eudaminae        | 04-SRNP-21152       | MHAHC070-05           | DQ293639                 |
| 5845              | Urbanus bellidHJ01 | Eudaminae        | 04-SRNP-31053       | MHAHC054-05           | DQ293637                 |
| 5846              | Urbanus bellidHJ01 | Eudaminae        | 04-SRNP-22913       | MHAHC063-05           | DQ293638                 |
| 5847              | Urbanus bellidHJ01 | Eudaminae        | 04-SRNP-45034       | MHAHC047-05           | DQ293636                 |
| 5848              | Urbanus bellidHJ01 | Eudaminae        | 04-SRNP-20680       | MHAHC031-05           | DQ293635                 |
| 5849              | Urbanus bellidHJ01 | Eudaminae        | 04-SRNP-20872       | MHAHC024-05           | DQ293634                 |
| 5850              | Urbanus bellidHJ01 | Eudaminae        | 04-SRNP-20925       | MHAHC008-05           | DQ293633                 |
| 5851              | Urbanus bellidHJ01 | Eudaminae        | 06-SRNP-59672       | MHAHK062-07           | JF761260                 |
| 5852              | Urbanus bellidHJ01 | Eudaminae        | 04-SRNP-47963       | MHAHC304-05           | DQ293663                 |
| 5853              | Urbanus bellidHJ01 | Eudaminae        | 04-SRNP-47882       | MHAHC303-05           | DQ293662                 |
| 5854              | Urbanus bellidHJ01 | Eudaminae        | 04-SRNP-47558       | MHAHC287-05           | DQ293655                 |
| 5855              | Urbanus bellidHJ01 | Eudaminae        | 04-SRNP-14305       | MHAHC282-05           | DQ293651                 |
| 5856              | Urbanus bellidHJ01 | Eudaminae        | 06-SRNP-40146       | MHAHG328-06           | GU151812                 |
| 5857              | Urbanus bellidHJ01 | Eudaminae        | 07-SRNP-20167       | MHMXXK312-07          | JF763313                 |
| 5858              | Urbanus bellidHJ01 | Eudaminae        | 01-SRNP-3403        | MHAHD932-05           | GU161950                 |
| 5859              | Urbanus bellidHJ01 | Eudaminae        | 02-SRNP-21477       | MHAHD430-05           | GU161935                 |
| 5860              | Urbanus bellidHJ01 | Eudaminae        | 03-SRNP-12581.1     | MHAHD553-05           | GU161959                 |
| 5861              | Urbanus bellidHJ01 | Eudaminae        | 03-SRNP-12948.1     | MHAHD561-05           | GU161960                 |
| 5862              | Urbanus bellidHJ01 | Eudaminae        | 07-SRNP-41928       | MHMXXO818-08          | JF763305                 |
| 5863              | Urbanus bellidHJ01 | Eudaminae        | 08-SRNP-4727        | MHMXX471-09           | JF778578                 |
| 5864              | Urbanus bellidHJ01 | Eudaminae        | 08-SRNP-65935       | MHMXY943-09           | GU666575                 |
| 5865              | Urbanus bellidHJ01 | Eudaminae        | 08-SRNP-5848        | MHMXY945-09           | GU666577                 |
| 5866              | Urbanus bellidHJ01 | Eudaminae        | 08-SRNP-23800       | MHMXY946-09           | GU666578                 |
| 5867              | Urbanus bellidHJ01 | Eudaminae        | 08-SRNP-24278       | MHMYB133-09           | GU649690                 |
| 5868              | Urbanus bellidHJ01 | Eudaminae        | 09-SRNP-69873       | MHMYG2418-10          | HM885841                 |
| 5869              | Astraptes tucuti   | Eudaminae        | 98-SRNP-15995       | CSCR037-04            | DQ291888                 |
| 5870              | Astraptes tucuti   | Eudaminae        | 01-SRNP-21502       | CSCR039-04            | DQ291889                 |
| 5871              | Astraptes tucuti   | Eudaminae        | 01-SRNP-21504       | CSCR040-04            | DQ291890                 |
| 5872              | Astraptes tucuti   | Eudaminae        | 04-SRNP-3376        | MHAHE028-05           | GU149430                 |
| 5873              | Astraptes tucuti   | Eudaminae        | 05-SRNP-4479        | MHAHF238-06           | GU150254                 |
| 5874              | Astraptes tucuti   | Eudaminae        | 05-SRNP-5094        | MHAHF300-06           | GU150255                 |
| 5875              | Astraptes tucuti   | Eudaminae        | 07-SRNP-42005       | MHMXP152-08           | JF761640                 |
| 5876              | Astraptes tucuti   | Eudaminae        | 04-SRNP-35322       | MHAHH243-06           | GU155110                 |
| 5877              | Astraptes tucuti   | Eudaminae        | 04-SRNP-35430       | MHAHH241-06           | GU155111                 |
| 5878              | Astraptes tucuti   | Eudaminae        | 04-SRNP-35323       | MHAHH239-06           | GU155112                 |
| 5879              | Astraptes tucuti   | Eudaminae        | 02-SRNP-3446        | CSRII092-04           | DQ291891                 |

| <b>Tree Order</b> | <b>Species</b>              | <b>Subfamily</b> | <b>ACG Sampleid</b> | <b>BOLD Processid</b> | <b>Genbank Accession</b> |
|-------------------|-----------------------------|------------------|---------------------|-----------------------|--------------------------|
| 5880              | <i>Astraptes tucuti</i>     | Eudaminae        | 07-SRNP-1173        | MHMXN289-07           | JF761644                 |
| 5881              | <i>Astraptes tucuti</i>     | Eudaminae        | 06-SRNP-41042       | MHAHG657-06           | GU151177                 |
| 5882              | <i>Astraptes tucuti</i>     | Eudaminae        | 06-SRNP-2459        | MHAHG656-06           | GU151178                 |
| 5883              | <i>Astraptes tucuti</i>     | Eudaminae        | 05-SRNP-4645        | MHAHF237-06           | GU150253                 |
| 5884              | <i>Astraptes tucuti</i>     | Eudaminae        | 04-SRNP-2718        | MHAHE027-05           | GU149429                 |
| 5885              | <i>Astraptes tucuti</i>     | Eudaminae        | 04-SRNP-60520       | MHAHE026-05           | GU149427                 |
| 5886              | <i>Astraptes tucuti</i>     | Eudaminae        | 04-SRNP-60491       | MHAHE025-05           | GU149428                 |
| 5887              | <i>Astraptes tucuti</i>     | Eudaminae        | 07-SRNP-2625        | MHMXN288-07           | JF761645                 |
| 5888              | <i>Astraptes tucuti</i>     | Eudaminae        | 07-SRNP-1968        | MHMXN292-07           | JF761643                 |
| 5889              | <i>Astraptes tucuti</i>     | Eudaminae        | 07-SRNP-35969       | MHMXN293-07           | JF761642                 |
| 5890              | <i>Astraptes tucuti</i>     | Eudaminae        | 07-SRNP-2349        | MHMXN294-07           | JF761641                 |
| 5891              | <i>Astraptes tucuti</i>     | Eudaminae        | 09-SRNP-56674       | MHMYG2385-10          | HM885809                 |
| 5892              | <i>Urbanus pronta</i>       | Eudaminae        | 04-SRNP-46061       | MHAHC086-05           | DQ293771                 |
| 5893              | <i>Urbanus pronta</i>       | Eudaminae        | 04-SRNP-46058       | MHAHC312-05           | DQ293779                 |
| 5894              | <i>Urbanus pronta</i>       | Eudaminae        | 04-SRNP-46056       | MHAHC055-05           | DQ293770                 |
| 5895              | <i>Urbanus pronta</i>       | Eudaminae        | 04-SRNP-46057       | MHAHC038-05           | DQ293769                 |
| 5896              | <i>Urbanus pronta</i>       | Eudaminae        | 08-SRNP-36361       | MHMXX470-09           | JF778581                 |
| 5897              | <i>Urbanus pronta</i>       | Eudaminae        | 06-SRNP-9393        | MHAHJ788-07           | JF753243                 |
| 5898              | <i>Urbanus pronta</i>       | Eudaminae        | 06-SRNP-45648       | MHAHI033-06           | GU156476                 |
| 5899              | <i>Urbanus pronta</i>       | Eudaminae        | 06-SRNP-45649       | MHAHI026-06           | GU156477                 |
| 5900              | <i>Urbanus pronta</i>       | Eudaminae        | 06-SRNP-3187        | MHAHG603-06           | GU151871                 |
| 5901              | <i>Urbanus pronta</i>       | Eudaminae        | 01-SRNP-3205        | MHAHC347-05           | DQ293781                 |
| 5902              | <i>Urbanus pronta</i>       | Eudaminae        | 01-SRNP-22501       | MHAHC346-05           | DQ293780                 |
| 5903              | <i>Urbanus pronta</i>       | Eudaminae        | 02-SRNP-17474       | MHAHC231-05           | DQ293778                 |
| 5904              | <i>Urbanus pronta</i>       | Eudaminae        | 02-SRNP-18620       | MHAHC223-05           | DQ293777                 |
| 5905              | <i>Urbanus pronta</i>       | Eudaminae        | 02-SRNP-27305       | MHAHC215-05           | DQ293776                 |
| 5906              | <i>Urbanus pronta</i>       | Eudaminae        | 02-SRNP-27308       | MHAHC207-05           | DQ293774                 |
| 5907              | <i>Urbanus pronta</i>       | Eudaminae        | 02-SRNP-1605        | MHAHC212-05           | DQ293775                 |
| 5908              | <i>Urbanus pronta</i>       | Eudaminae        | 02-SRNP-17477       | MHAHC191-05           | DQ293772                 |
| 5909              | <i>Urbanus pronta</i>       | Eudaminae        | 02-SRNP-17476       | MHAHC199-05           | DQ293773                 |
| 5910              | <i>Urbanus pronta</i>       | Eudaminae        | 06-SRNP-5958        | MHAHI028-06           | GU156475                 |
| 5911              | <i>Urbanus pronta</i>       | Eudaminae        | 06-SRNP-23251       | MHAHJ744-07           | JF753242                 |
| 5912              | <i>Urbanus pronta</i>       | Eudaminae        | 09-SRNP-58058       | MHMYG2416-10          | HM885839                 |
| 5913              | <i>Urbanus pronta</i>       | Eudaminae        | 09-SRNP-58053       | MHMYG2021-10          | HM885423                 |
| 5914              | <i>Astraptes apastus</i>    | Eudaminae        | 03-SRNP-20746       | CSCRC308-04           | DQ291856                 |
| 5915              | <i>Astraptes apastus</i>    | Eudaminae        | 07-SRNP-40564       | MHMXX102-07           | JF761468                 |
| 5916              | <i>Astraptes brevicauda</i> | Eudaminae        | 03-SRNP-11830       | MHAHE108-05           | GU149418                 |
| 5917              | <i>Astraptes brevicauda</i> | Eudaminae        | 08-SRNP-1126        | MHMXW554-09           | JF753663                 |
| 5918              | <i>Astraptes brevicauda</i> | Eudaminae        | 05-SRNP-40306       | MHAHF243-06           | GU150207                 |
| 5919              | <i>Astraptes brevicauda</i> | Eudaminae        | 01-SRNP-3278        | CSCRC024-04           | DQ291859                 |
| 5920              | <i>Astraptes brevicauda</i> | Eudaminae        | 01-SRNP-5574        | CSCRC025-04           | DQ291860                 |
| 5921              | <i>Astraptes brevicauda</i> | Eudaminae        | 05-SRNP-41750       | MHAHF299-06           | GU150209                 |
| 5922              | <i>Astraptes brevicauda</i> | Eudaminae        | 04-SRNP-23822       | MHAHE042-05           | GU149413                 |
| 5923              | <i>Astraptes brevicauda</i> | Eudaminae        | 04-SRNP-41627       | MHAHE043-05           | GU149412                 |
| 5924              | <i>Astraptes brevicauda</i> | Eudaminae        | 04-SRNP-42195       | MHAHE044-05           | GU149414                 |
| 5925              | <i>Astraptes brevicauda</i> | Eudaminae        | 04-SRNP-4716        | MHAHE045-05           | GU149411                 |
| 5926              | <i>Astraptes brevicauda</i> | Eudaminae        | 03-SRNP-11273       | MHAHE107-05           | GU149415                 |
| 5927              | <i>Astraptes brevicauda</i> | Eudaminae        | 03-SRNP-6444        | MHAHE109-05           | GU149416                 |
| 5928              | <i>Astraptes brevicauda</i> | Eudaminae        | 03-SRNP-6247        | MHAHE110-05           | GU149417                 |
| 5929              | <i>Astraptes brevicauda</i> | Eudaminae        | 05-SRNP-390         | MHAHF244-06           | GU150206                 |
| 5930              | <i>Astraptes brevicauda</i> | Eudaminae        | 05-SRNP-41809       | MHAHF298-06           | GU150208                 |
| 5931              | <i>Astraptes brevicauda</i> | Eudaminae        | 06-SRNP-31309       | MHAHG658-06           | GU151090                 |
| 5932              | <i>Astraptes brevicauda</i> | Eudaminae        | 06-SRNP-3274        | MHAHH564-06           | GU154918                 |
| 5933              | <i>Astraptes brevicauda</i> | Eudaminae        | 07-SRNP-1174        | MHMXX095-07           | JF761471                 |
| 5934              | <i>Astraptes brevicauda</i> | Eudaminae        | 05-SRNP-7334        | MHAHL109-07           | JF761469                 |
| 5935              | <i>Astraptes brevicauda</i> | Eudaminae        | 07-SRNP-66036       | MHMXR798-08           | JF761470                 |

| Tree Order | Species                                | Subfamily | ACG Sampleid  | BOLD Processid | Genbank Accession |
|------------|----------------------------------------|-----------|---------------|----------------|-------------------|
| 5936       | <i>Astraptes brevicauda</i>            | Eudaminae | 08-SRNP-1013  | MHMWX555-09    | JF753664          |
| 5937       | <i>Astraptes brevicauda</i>            | Eudaminae | 08-SRNP-5071  | MHMXX485-09    | JF777601          |
| 5938       | <i>Astraptes anaphus annetta</i> DHJ01 | Eudaminae | 04-SRNP-686   | MHAHH759-06    | GU154896          |
| 5939       | <i>Astraptes anaphus annetta</i> DHJ01 | Eudaminae | 04-SRNP-1067  | MHAHE158-05    | GU149408          |
| 5940       | <i>Astraptes anaphus annetta</i> DHJ01 | Eudaminae | 01-SRNP-16954 | MHAHH761-06    | GU154897          |
| 5941       | <i>Astraptes anaphus annetta</i> DHJ01 | Eudaminae | 02-SRNP-28707 | MHAHH817-06    | GU154895          |
| 5942       | <i>Astraptes anaphus annetta</i> DHJ01 | Eudaminae | 07-SRNP-33566 | MHMXT216-08    | JF761456          |
| 5943       | <i>Astraptes anaphus annetta</i> DHJ03 | Eudaminae | 97-SRNP-417   | MHMXXG311-07   | JF760296          |
| 5944       | <i>Astraptes anaphus annetta</i> DHJ03 | Eudaminae | 97-SRNP-451   | MHMXXG326-07   | JF760301          |
| 5945       | <i>Astraptes anaphus annetta</i> DHJ03 | Eudaminae | 02-SRNP-28432 | MHMXXG303-07   | JF760304          |
| 5946       | <i>Astraptes anaphus annetta</i> DHJ03 | Eudaminae | 00-SRNP-20224 | CSCR021-04     | DQ291855          |
| 5947       | <i>Astraptes anaphus annetta</i> DHJ03 | Eudaminae | 97-SRNP-492   | MHMXXG284-07   | JF760303          |
| 5948       | <i>Astraptes anaphus annetta</i> DHJ03 | Eudaminae | 93-SRNP-4847  | MHMXXG292-07   | JF760295          |
| 5949       | <i>Astraptes anaphus annetta</i> DHJ03 | Eudaminae | 03-SRNP-26790 | MHAHH754-06    | GU154906          |
| 5950       | <i>Astraptes anaphus annetta</i> DHJ03 | Eudaminae | 97-SRNP-457   | MHMXXG286-07   | JF760299          |
| 5951       | <i>Astraptes anaphus annetta</i> DHJ03 | Eudaminae | 93-SRNP-7914  | MHMXXG302-07   | JF760306          |
| 5952       | <i>Astraptes anaphus annetta</i> DHJ03 | Eudaminae | 97-SRNP-462   | MHAHH772-06    | GU154917          |
| 5953       | <i>Astraptes anaphus annetta</i> DHJ03 | Eudaminae | 02-SRNP-5751  | MHAHH769-06    | GU154915          |
| 5954       | <i>Astraptes anaphus annetta</i> DHJ03 | Eudaminae | 02-SRNP-5101  | MHAHH764-06    | GU154911          |
| 5955       | <i>Astraptes anaphus annetta</i> DHJ03 | Eudaminae | 02-SRNP-5100  | MHAHH763-06    | GU154910          |
| 5956       | <i>Astraptes anaphus annetta</i> DHJ03 | Eudaminae | 02-SRNP-29489 | MHAHH816-06    | GU154904          |
| 5957       | <i>Astraptes anaphus annetta</i> DHJ03 | Eudaminae | 94-SRNP-7681  | MHMXXG296-07   | JF760292          |
| 5958       | <i>Astraptes anaphus annetta</i> DHJ03 | Eudaminae | 06-SRNP-46316 | MHAHJ646-07    | JF752384          |
| 5959       | <i>Astraptes anaphus annetta</i> DHJ03 | Eudaminae | 07-SRNP-20031 | MHMXXK120-07   | JF761467          |
| 5960       | <i>Astraptes anaphus annetta</i> DHJ03 | Eudaminae | 07-SRNP-20299 | MHMXXK123-07   | JF761465          |
| 5961       | <i>Astraptes anaphus annetta</i> DHJ03 | Eudaminae | 07-SRNP-20217 | MHMXXK125-07   | JF761463          |
| 5962       | <i>Astraptes anaphus annetta</i> DHJ03 | Eudaminae | 07-SRNP-23872 | MHMXXR899-08   | JF761461          |
| 5963       | <i>Astraptes anaphus annetta</i> DHJ03 | Eudaminae | 94-SRNP-7840  | MHMXXG317-07   | JF760291          |
| 5964       | <i>Astraptes anaphus annetta</i> DHJ03 | Eudaminae | 00-SRNP-20296 | MHMXXG305-07   | JF760302          |
| 5965       | <i>Astraptes anaphus annetta</i> DHJ03 | Eudaminae | 06-SRNP-3246  | MHAHI158-06    | GU155770          |
| 5966       | <i>Astraptes anaphus annetta</i> DHJ03 | Eudaminae | 00-SRNP-20174 | CSCR020-04     | DQ291854          |
| 5967       | <i>Astraptes anaphus annetta</i> DHJ03 | Eudaminae | 94-SRNP-7838  | MHMXXG320-07   | JF760308          |
| 5968       | <i>Astraptes anaphus annetta</i> DHJ03 | Eudaminae | 93-SRNP-6735  | MHMXXG327-07   | JF760298          |
| 5969       | <i>Astraptes anaphus annetta</i> DHJ03 | Eudaminae | 92-SRNP-4964  | MHMXXG323-07   | JF760305          |
| 5970       | <i>Astraptes anaphus annetta</i> DHJ03 | Eudaminae | 97-SRNP-10083 | MHMXXG315-07   | JF760293          |
| 5971       | <i>Astraptes anaphus annetta</i> DHJ03 | Eudaminae | 92-SRNP-4961  | MHMXXG306-07   | JF760300          |
| 5972       | <i>Astraptes anaphus annetta</i> DHJ03 | Eudaminae | 07-SRNP-20148 | MHMXXK121-07   | JF761466          |
| 5973       | <i>Astraptes anaphus annetta</i> DHJ03 | Eudaminae | 02-SRNP-28615 | MHAHI1057-07   | GU155771          |
| 5974       | <i>Astraptes anaphus annetta</i> DHJ03 | Eudaminae | 05-SRNP-2000  | MHAHF519-06    | GU150204          |
| 5975       | <i>Astraptes anaphus annetta</i> DHJ03 | Eudaminae | 00-SRNP-19298 | MHMXXG309-07   | JF760309          |
| 5976       | <i>Astraptes anaphus annetta</i> DHJ03 | Eudaminae | 00-SRNP-20267 | MHMXXG319-07   | JF760289          |
| 5977       | <i>Astraptes anaphus annetta</i> DHJ03 | Eudaminae | 97-SRNP-11538 | MHMXXG333-07   | JF760294          |
| 5978       | <i>Astraptes anaphus annetta</i> DHJ03 | Eudaminae | 07-SRNP-20264 | MHMXXK124-07   | JF761464          |
| 5979       | <i>Astraptes anaphus annetta</i> DHJ03 | Eudaminae | 93-SRNP-8375  | MHAHI1061-07   | GU155773          |
| 5980       | <i>Astraptes anaphus annetta</i> DHJ03 | Eudaminae | 00-SRNP-17721 | MHMXXG288-07   | JF760297          |
| 5981       | <i>Astraptes anaphus annetta</i> DHJ03 | Eudaminae | 02-SRNP-28828 | MHAHI1058-07   | GU155772          |
| 5982       | <i>Astraptes anaphus annetta</i> DHJ03 | Eudaminae | 00-SRNP-6012  | MHAHI1059-07   | GU155774          |
| 5983       | <i>Astraptes anaphus annetta</i> DHJ03 | Eudaminae | 01-SRNP-17042 | MHAHH819-06    | GU154905          |
| 5984       | <i>Astraptes anaphus annetta</i> DHJ03 | Eudaminae | 97-SRNP-9242  | MHAHH820-06    | GU154903          |
| 5985       | <i>Astraptes anaphus annetta</i> DHJ03 | Eudaminae | 00-SRNP-20270 | MHAHH770-06    | GU154916          |
| 5986       | <i>Astraptes anaphus annetta</i> DHJ03 | Eudaminae | 02-SRNP-30063 | MHAHH768-06    | GU154914          |
| 5987       | <i>Astraptes anaphus annetta</i> DHJ03 | Eudaminae | 02-SRNP-28709 | MHAHH766-06    | GU154913          |
| 5988       | <i>Astraptes anaphus annetta</i> DHJ03 | Eudaminae | 02-SRNP-28395 | MHAHH765-06    | GU154912          |
| 5989       | <i>Astraptes anaphus annetta</i> DHJ03 | Eudaminae | 97-SRNP-2276  | MHAHH762-06    | GU154909          |
| 5990       | <i>Astraptes anaphus annetta</i> DHJ03 | Eudaminae | 03-SRNP-34428 | MHAHH756-06    | GU154908          |
| 5991       | <i>Astraptes anaphus annetta</i> DHJ03 | Eudaminae | 03-SRNP-7277  | MHAHH755-06    | GU154907          |

| <b>Tree Order</b> | <b>Species</b>                 | <b>Subfamily</b> | <b>ACG Sampleid</b> | <b>BOLD Processid</b> | <b>Genbank Accession</b> |
|-------------------|--------------------------------|------------------|---------------------|-----------------------|--------------------------|
| 5992              | Astraptes anaphus annettaDHJ03 | Eudaminae        | 06-SRNP-41210       | MHAHG707-06           | GU151086                 |
| 5993              | Astraptes anaphus annettaDHJ03 | Eudaminae        | 06-SRNP-41208       | MHAHG706-06           | GU151087                 |
| 5994              | Astraptes anaphus annettaDHJ03 | Eudaminae        | 04-SRNP-13408       | MHAHE159-05           | GU149410                 |
| 5995              | Astraptes anaphus annettaDHJ03 | Eudaminae        | 93-SRNP-4846        | MHMXG297-07           | JF760290                 |
| 5996              | Astraptes anaphus annettaDHJ03 | Eudaminae        | 93-SRNP-7913        | MHMXG321-07           | JF760307                 |
| 5997              | Astraptes anaphus annettaDHJ03 | Eudaminae        | 07-SRNP-20180       | MHMXXK126-07          | JF761462                 |
| 5998              | Astraptes anaphus annettaDHJ03 | Eudaminae        | 07-SRNP-42788       | MHMXT176-08           | JF761460                 |
| 5999              | Astraptes anaphus annettaDHJ02 | Eudaminae        | 92-SRNP-4965        | MHMXG322-07           | JF760283                 |
| 6000              | Astraptes anaphus annettaDHJ02 | Eudaminae        | 97-SRNP-421         | MHMXG331-07           | JF760274                 |
| 6001              | Astraptes anaphus annettaDHJ02 | Eudaminae        | 00-SRNP-19297       | MHMXG330-07           | JF760261                 |
| 6002              | Astraptes anaphus annettaDHJ02 | Eudaminae        | 97-SRNP-480         | MHMXG314-07           | JF760267                 |
| 6003              | Astraptes anaphus annettaDHJ02 | Eudaminae        | 92-SRNP-4960        | MHMXG328-07           | JF760288                 |
| 6004              | Astraptes anaphus annettaDHJ02 | Eudaminae        | 06-SRNP-30279       | MHAHG110-06           | GU151083                 |
| 6005              | Astraptes anaphus annettaDHJ02 | Eudaminae        | 97-SRNP-3128        | MHMXG304-07           | JF760280                 |
| 6006              | Astraptes anaphus annettaDHJ02 | Eudaminae        | 97-SRNP-3009        | MHMXG307-07           | JF760276                 |
| 6007              | Astraptes anaphus annettaDHJ02 | Eudaminae        | 93-SRNP-8376        | MHAHI1062-07          | GU155768                 |
| 6008              | Astraptes anaphus annettaDHJ02 | Eudaminae        | 06-SRNP-41207       | MHAHH497-06           | GU154902                 |
| 6009              | Astraptes anaphus annettaDHJ02 | Eudaminae        | 02-SRNP-28509       | MHMXG290-07           | JF760259                 |
| 6010              | Astraptes anaphus annettaDHJ02 | Eudaminae        | 93-SRNP-6180        | MHMXG293-07           | JF760269                 |
| 6011              | Astraptes anaphus annettaDHJ02 | Eudaminae        | 97-SRNP-2560        | MHMXG285-07           | JF760278                 |
| 6012              | Astraptes anaphus annettaDHJ02 | Eudaminae        | 96-SRNP-4565        | MHMXG283-07           | JF760282                 |
| 6013              | Astraptes anaphus annettaDHJ02 | Eudaminae        | 93-SRNP-6733        | MHAHI1060-07          | GU155766                 |
| 6014              | Astraptes anaphus annettaDHJ02 | Eudaminae        | 02-SRNP-32066       | MHAHH818-06           | GU154898                 |
| 6015              | Astraptes anaphus annettaDHJ02 | Eudaminae        | 97-SRNP-2566        | MHAHH771-06           | GU154901                 |
| 6016              | Astraptes anaphus annettaDHJ02 | Eudaminae        | 02-SRNP-28069       | MHAHH767-06           | GU154900                 |
| 6017              | Astraptes anaphus annettaDHJ02 | Eudaminae        | 02-SRNP-2245        | MHAHH760-06           | GU154899                 |
| 6018              | Astraptes anaphus annettaDHJ02 | Eudaminae        | 06-SRNP-41209       | MHAHG705-06           | GU151084                 |
| 6019              | Astraptes anaphus annettaDHJ02 | Eudaminae        | 06-SRNP-41039       | MHAHG704-06           | GU151085                 |
| 6020              | Astraptes anaphus annettaDHJ02 | Eudaminae        | 04-SRNP-61482       | MHAHE160-05           | GU149409                 |
| 6021              | Astraptes anaphus annettaDHJ02 | Eudaminae        | 94-SRNP-6194        | MHMXG329-07           | JF760287                 |
| 6022              | Astraptes anaphus annettaDHJ02 | Eudaminae        | 96-SRNP-4564        | MHMXG316-07           | JF760265                 |
| 6023              | Astraptes anaphus annettaDHJ02 | Eudaminae        | 93-SRNP-6178        | MHMXG301-07           | JF760284                 |
| 6024              | Astraptes anaphus annettaDHJ02 | Eudaminae        | 94-SRNP-7265        | MHMXG300-07           | JF760285                 |
| 6025              | Astraptes anaphus annettaDHJ02 | Eudaminae        | 93-SRNP-4708        | MHMXG295-07           | JF760266                 |
| 6026              | Astraptes anaphus annettaDHJ02 | Eudaminae        | 93-SRNP-8379        | MHMXG291-07           | JF760273                 |
| 6027              | Astraptes anaphus annettaDHJ02 | Eudaminae        | 93-SRNP-6179        | MHMXG289-07           | JF760286                 |
| 6028              | Astraptes anaphus annettaDHJ02 | Eudaminae        | 92-SRNP-4963        | MHAHI1063-07          | GU155767                 |
| 6029              | Astraptes anaphus annettaDHJ02 | Eudaminae        | 02-SRNP-5753        | MHMXG298-07           | JF760263                 |
| 6030              | Astraptes anaphus annettaDHJ02 | Eudaminae        | 93-SRNP-7917        | MHMXG325-07           | JF760279                 |
| 6031              | Astraptes anaphus annettaDHJ02 | Eudaminae        | 93-SRNP-5032        | MHMXG308-07           | JF760275                 |
| 6032              | Astraptes anaphus annettaDHJ02 | Eudaminae        | 94-SRNP-6195        | MHMXG324-07           | JF760281                 |
| 6033              | Astraptes anaphus annettaDHJ02 | Eudaminae        | 97-SRNP-2556        | MHMXG313-07           | JF760270                 |
| 6034              | Astraptes anaphus annettaDHJ02 | Eudaminae        | 93-SRNP-8378        | MHMXG299-07           | JF760262                 |
| 6035              | Astraptes anaphus annettaDHJ02 | Eudaminae        | 97-SRNP-2559        | MHMXG287-07           | JF760277                 |
| 6036              | Astraptes anaphus annettaDHJ02 | Eudaminae        | 97-SRNP-418         | MHMXG332-07           | JF760272                 |
| 6037              | Astraptes anaphus annettaDHJ02 | Eudaminae        | 06-SRNP-21977       | MHAHJ790-07           | JF752383                 |
| 6038              | Astraptes anaphus annettaDHJ02 | Eudaminae        | 07-SRNP-20150       | MHMXXK119-07          | JF761459                 |
| 6039              | Astraptes anaphus annettaDHJ02 | Eudaminae        | 07-SRNP-20439       | MHMXXK122-07          | JF761458                 |
| 6040              | Astraptes anaphus annettaDHJ02 | Eudaminae        | 07-SRNP-20089       | MHMXXK127-07          | JF761457                 |
| 6041              | Astraptes anaphus annettaDHJ02 | Eudaminae        | 02-SRNP-28508       | MHMXG294-07           | JF760268                 |
| 6042              | Astraptes anaphus annettaDHJ02 | Eudaminae        | 97-SRNP-477         | MHMXG310-07           | JF760260                 |
| 6043              | Astraptes anaphus annettaDHJ02 | Eudaminae        | 97-SRNP-420         | MHMXG312-07           | JF760271                 |
| 6044              | Astraptes anaphus annettaDHJ02 | Eudaminae        | 00-SRNP-20266       | MHMXG318-07           | JF760264                 |
| 6045              | Astraptes anaphus annettaDHJ02 | Eudaminae        | 09-SRNP-44302       | MHMYE1518-09          | GU653488                 |
| 6046              | Astraptes anaphus annettaDHJ02 | Eudaminae        | 09-SRNP-20617       | MHMYG2413-10          | HM885836                 |
| 6047              | Astraptes hopfferiDHJ02        | Eudaminae        | 00-SRNP-6038        | CSCR031-04            | DQ291879                 |

| <b>Tree Order</b> | <b>Species</b>          | <b>Subfamily</b> | <b>ACG Sampleid</b> | <b>BOLD Processid</b> | <b>Genbank Accession</b> |
|-------------------|-------------------------|------------------|---------------------|-----------------------|--------------------------|
| 6048              | Astraptes hopfferiDHJ02 | Eudaminae        | 05-SRNP-60351       | MHAHF725-06           | GU150226                 |
| 6049              | Astraptes hopfferiDHJ02 | Eudaminae        | 05-SRNP-60641       | MHAHF723-06           | GU150230                 |
| 6050              | Astraptes hopfferiDHJ02 | Eudaminae        | 05-SRNP-24819       | MHAHF726-06           | GU150236                 |
| 6051              | Astraptes hopfferiDHJ02 | Eudaminae        | 05-SRNP-24755       | MHAHF727-06           | GU150233                 |
| 6052              | Astraptes hopfferiDHJ02 | Eudaminae        | 05-SRNP-24197       | MHAHF732-06           | GU150240                 |
| 6053              | Astraptes hopfferiDHJ02 | Eudaminae        | 05-SRNP-19978       | MHAHF733-06           | GU150239                 |
| 6054              | Astraptes hopfferiDHJ02 | Eudaminae        | 05-SRNP-66135       | MHAHF722-06           | GU150232                 |
| 6055              | Astraptes hopfferiDHJ02 | Eudaminae        | 05-SRNP-24396       | MHAHF731-06           | GU150231                 |
| 6056              | Astraptes hopfferiDHJ02 | Eudaminae        | 05-SRNP-60568       | MHAHF734-06           | GU150237                 |
| 6057              | Astraptes hopfferiDHJ02 | Eudaminae        | 05-SRNP-61464       | MHAHF735-06           | GU150234                 |
| 6058              | Astraptes hopfferiDHJ02 | Eudaminae        | 05-SRNP-24340       | MHAHF737-06           | GU150241                 |
| 6059              | Astraptes hopfferiDHJ02 | Eudaminae        | 07-SRNP-57872       | MHM XO875-08          | JF761533                 |
| 6060              | Astraptes hopfferiDHJ02 | Eudaminae        | 00-SRNP-6035        | CSC R030-04           | DQ291878                 |
| 6061              | Astraptes hopfferiDHJ02 | Eudaminae        | 06-SRNP-58062       | MHAHJ735-07           | JF752394                 |
| 6062              | Astraptes hopfferiDHJ02 | Eudaminae        | 07-SRNP-21123       | MHM XN285-07          | JF761536                 |
| 6063              | Astraptes hopfferiDHJ02 | Eudaminae        | 07-SRNP-20481       | MHM XK118-07          | JF761539                 |
| 6064              | Astraptes hopfferiDHJ02 | Eudaminae        | 07-SRNP-20482       | MHM XK116-07          | JF761538                 |
| 6065              | Astraptes hopfferiDHJ02 | Eudaminae        | 02-SRNP-5424        | MHAH H885-06          | GU154986                 |
| 6066              | Astraptes hopfferiDHJ02 | Eudaminae        | 99-SRNP-2552        | MHAH H881-06          | GU154982                 |
| 6067              | Astraptes hopfferiDHJ02 | Eudaminae        | 98-SRNP-4521        | MHAH H879-06          | GU154981                 |
| 6068              | Astraptes hopfferiDHJ02 | Eudaminae        | 01-SRNP-16888       | MHAH H875-06          | GU154978                 |
| 6069              | Astraptes hopfferiDHJ02 | Eudaminae        | 01-SRNP-16907       | MHAH H871-06          | GU154977                 |
| 6070              | Astraptes hopfferiDHJ02 | Eudaminae        | 95-SRNP-10163       | MHAH H867-06          | GU154974                 |
| 6071              | Astraptes hopfferiDHJ02 | Eudaminae        | 05-SRNP-19981       | MHAHF265-06           | GU150228                 |
| 6072              | Astraptes hopfferiDHJ02 | Eudaminae        | 05-SRNP-19980       | MHAHF264-06           | GU150229                 |
| 6073              | Astraptes hopfferiDHJ02 | Eudaminae        | 04-SRNP-15947       | MHAHE024-05           | GU149426                 |
| 6074              | Astraptes hopfferiDHJ02 | Eudaminae        | 05-SRNP-21448       | MHAHF231-06           | GU150227                 |
| 6075              | Astraptes hopfferiDHJ02 | Eudaminae        | 96-SRNP-9303        | MHAH H869-06          | GU154975                 |
| 6076              | Astraptes hopfferiDHJ02 | Eudaminae        | 05-SRNP-24589       | MHAHF728-06           | GU150235                 |
| 6077              | Astraptes hopfferiDHJ02 | Eudaminae        | 05-SRNP-24568       | MHAHF729-06           | GU150238                 |
| 6078              | Astraptes hopfferiDHJ02 | Eudaminae        | 98-SRNP-4411        | MHAH H886-06          | GU154985                 |
| 6079              | Astraptes hopfferiDHJ02 | Eudaminae        | 07-SRNP-55079       | MHAHK230-07           | JF760352                 |
| 6080              | Astraptes hopfferiDHJ02 | Eudaminae        | 07-SRNP-20899       | MHM XN284-07          | JF761537                 |
| 6081              | Astraptes hopfferiDHJ02 | Eudaminae        | 07-SRNP-24342       | MHM XT146-08          | JF761530                 |
| 6082              | Astraptes hopfferiDHJ02 | Eudaminae        | 07-SRNP-15266       | MHM XX735-09          | JF777626                 |
| 6083              | Astraptes hopfferiDHJ02 | Eudaminae        | 07-SRNP-15267       | MHM XX736-09          | JF777627                 |
| 6084              | Astraptes hopfferiDHJ02 | Eudaminae        | 07-SRNP-15268       | MHM XX737-09          | JF777628                 |
| 6085              | Astraptes hopfferiDHJ02 | Eudaminae        | 08-SRNP-16500       | MHM XY1101-09         | GU666441                 |
| 6086              | Astraptes hopfferiDHJ02 | Eudaminae        | 08-SRNP-16501       | MHM XY1103-09         | GU666435                 |
| 6087              | Astraptes hopfferiDHJ02 | Eudaminae        | 08-SRNP-16509       | MHM XY1104-09         | GU666436                 |
| 6088              | Astraptes hopfferiDHJ02 | Eudaminae        | 08-SRNP-65151       | MHM XS094-08          | JF761532                 |
| 6089              | Astraptes hopfferiDHJ02 | Eudaminae        | 07-SRNP-24343       | MHM XT145-08          | JF761531                 |
| 6090              | Astraptes hopfferiDHJ02 | Eudaminae        | 08-SRNP-16506       | MHM XY1105-09         | HM390683                 |
| 6091              | Astraptes hopfferiDHJ02 | Eudaminae        | 08-SRNP-14782       | MHM XY1106-09         | GU666437                 |
| 6092              | Astraptes hopfferiDHJ02 | Eudaminae        | 08-SRNP-16510       | MHM XY1107-09         | GU666438                 |
| 6093              | Astraptes hopfferiDHJ02 | Eudaminae        | 08-SRNP-16504       | MHM XY1108-09         | GU666431                 |
| 6094              | Astraptes hopfferiDHJ02 | Eudaminae        | 00-SRNP-18470       | MHAH H866-06          | GU154973                 |
| 6095              | Astraptes hopfferiDHJ02 | Eudaminae        | 03-SRNP-15756       | MHAH H870-06          | GU154976                 |
| 6096              | Astraptes hopfferiDHJ02 | Eudaminae        | 02-SRNP-13859       | MHAH H876-06          | GU154972                 |
| 6097              | Astraptes hopfferiDHJ02 | Eudaminae        | 01-SRNP-16887       | MHAH H877-06          | GU154979                 |
| 6098              | Astraptes hopfferiDHJ02 | Eudaminae        | 02-SRNP-13861       | MHAH H878-06          | GU154980                 |
| 6099              | Astraptes hopfferiDHJ02 | Eudaminae        | 02-SRNP-33228       | MHAH H882-06          | GU154983                 |
| 6100              | Astraptes hopfferiDHJ02 | Eudaminae        | 02-SRNP-33292       | MHAH H883-06          | GU154984                 |
| 6101              | Astraptes hopfferiDHJ02 | Eudaminae        | 01-SRNP-16885       | MHAH H884-06          | GU154971                 |
| 6102              | Astraptes hopfferiDHJ02 | Eudaminae        | 07-SRNP-55080       | MHM XK117-07          | JF761540                 |
| 6103              | Astraptes hopfferiDHJ02 | Eudaminae        | 07-SRNP-57649       | MHM XO871-08          | JF761535                 |

| <b>Tree Order</b> | <b>Species</b>               | <b>Subfamily</b> | <b>ACG Sampleid</b> | <b>BOLD Processid</b> | <b>Genbank Accession</b> |
|-------------------|------------------------------|------------------|---------------------|-----------------------|--------------------------|
| 6104              | Astraptus hopfferiDHJ02      | Eudaminae        | 07-SRNP-57556       | MHM XO874-08          | JF761534                 |
| 6105              | Astraptus hopfferiDHJ02      | Eudaminae        | 08-SRNP-13809       | MHM XW361-09          | JF753668                 |
| 6106              | Astraptus hopfferiDHJ02      | Eudaminae        | 08-SRNP-13808       | MHM XW362-09          | JF753669                 |
| 6107              | Astraptus hopfferiDHJ02      | Eudaminae        | 08-SRNP-16352       | MHM XY1102-09         | GU666442                 |
| 6108              | Astraptus hopfferiDHJ02      | Eudaminae        | 08-SRNP-16353       | MHM XY1109-09         | GU666432                 |
| 6109              | Astraptus hopfferiDHJ01      | Eudaminae        | 05-SRNP-60355       | MH AHF724-06          | GU150223                 |
| 6110              | Astraptus hopfferiDHJ01      | Eudaminae        | 05-SRNP-24692       | MH AHF730-06          | GU150225                 |
| 6111              | Astraptus hopfferiDHJ01      | Eudaminae        | 05-SRNP-24395       | MH AHF736-06          | GU150224                 |
| 6112              | Astraptus hopfferiDHJ01      | Eudaminae        | 05-SRNP-21444       | MH AHF239-06          | GU150222                 |
| 6113              | Astraptus hopfferiDHJ01      | Eudaminae        | 98-SRNP-4412        | MH AHH868-06          | GU154966                 |
| 6114              | Astraptus hopfferiDHJ01      | Eudaminae        | 98-SRNP-4402        | MH AHH872-06          | GU154968                 |
| 6115              | Astraptus hopfferiDHJ01      | Eudaminae        | 98-SRNP-4409        | MH AHH873-06          | GU154969                 |
| 6116              | Astraptus hopfferiDHJ01      | Eudaminae        | 98-SRNP-4399        | MH AHH874-06          | GU154970                 |
| 6117              | Astraptus hopfferiDHJ01      | Eudaminae        | 98-SRNP-4408        | MH AHH880-06          | GU154967                 |
| 6118              | Astraptus hopfferiDHJ01      | Eudaminae        | 08-SRNP-24553       | MH MYB126-09          | GU649699                 |
| 6119              | Astraptus chiriquensis       | Eudaminae        | 05-SRNP-32306       | MH AHE426-05          | GU149419                 |
| 6120              | Astraptus chiriquensis       | Eudaminae        | 04-SRNP-33647       | MH AHD875-05          | GU161291                 |
| 6121              | Astraptus chiriquensis       | Eudaminae        | 04-SRNP-2338        | CS RII429-04          | DQ291861                 |
| 6122              | Astraptus chiriquensis       | Eudaminae        | 06-SRNP-31610       | MH AHH496-06          | GU154927                 |
| 6123              | Astraptus chiriquensis       | Eudaminae        | 07-SRNP-41188       | MH MXN308-07          | JF761490                 |
| 6124              | Astraptus chiriquensis       | Eudaminae        | 07-SRNP-40863       | MH MXN309-07          | JF761489                 |
| 6125              | Astraptus chiriquensis       | Eudaminae        | 07-SRNP-23622       | MH MXP167-08          | JF761488                 |
| 6126              | Astraptus alardus            | Eudaminae        | 05-SRNP-66269       | MH AHG116-06          | GU151081                 |
| 6127              | Astraptus alardus            | Eudaminae        | 05-SRNP-57547       | MH AHF311-06          | GU150201                 |
| 6128              | Astraptus alardus            | Eudaminae        | 07-SRNP-56409       | MH MXN314-07          | JF761449                 |
| 6129              | Astraptus alardus            | Eudaminae        | 07-SRNP-56408       | MH MXN313-07          | JF761450                 |
| 6130              | Astraptus alardus            | Eudaminae        | 07-SRNP-35878       | MH MXN312-07          | JF761451                 |
| 6131              | Astraptus alardus            | Eudaminae        | 07-SRNP-56961       | MH MXN310-07          | JF761453                 |
| 6132              | Astraptus alardus            | Eudaminae        | 07-SRNP-56397       | MH MXK100-07          | JF761454                 |
| 6133              | Astraptus alardus            | Eudaminae        | 06-SRNP-58880       | MH AHK077-07          | JF760258                 |
| 6134              | Astraptus alardus            | Eudaminae        | 04-SRNP-60018       | MH AHD719-05          | GU161287                 |
| 6135              | Astraptus alardus            | Eudaminae        | 04-SRNP-35460       | MH AHD718-05          | GU161290                 |
| 6136              | Astraptus alardus            | Eudaminae        | 04-SRNP-45519       | MH AHD717-05          | GU161289                 |
| 6137              | Astraptus alardus            | Eudaminae        | 04-SRNP-35461       | MH AHD716-05          | GU161285                 |
| 6138              | Astraptus alardus            | Eudaminae        | 04-SRNP-24624       | MH AHD714-05          | GU161288                 |
| 6139              | Astraptus alardus            | Eudaminae        | 07-SRNP-35859       | MH MXP166-08          | JF761444                 |
| 6140              | Astraptus alardus            | Eudaminae        | 07-SRNP-56299       | MH MXK099-07          | JF761455                 |
| 6141              | Astraptus alardus            | Eudaminae        | 05-SRNP-57546       | MH AHF313-06          | GU150203                 |
| 6142              | Astraptus alardus            | Eudaminae        | 05-SRNP-66293       | MH AHG115-06          | GU151082                 |
| 6143              | Astraptus alardus            | Eudaminae        | 04-SRNP-34471       | MH AHD715-05          | GU161286                 |
| 6144              | Astraptus alardus            | Eudaminae        | 03-SRNP-3693        | CS CR306-04           | DQ291852                 |
| 6145              | Astraptus alardus            | Eudaminae        | 07-SRNP-56473       | MH MXN316-07          | JF761447                 |
| 6146              | Astraptus alardus            | Eudaminae        | 06-SRNP-35909       | MH AHK075-07          | JF760256                 |
| 6147              | Astraptus alardus            | Eudaminae        | 06-SRNP-35908       | MH AHK076-07          | JF760257                 |
| 6148              | Astraptus alardus            | Eudaminae        | 03-SRNP-3691        | CS CR307-04           | DQ291853                 |
| 6149              | Astraptus alardus            | Eudaminae        | 05-SRNP-20286       | MH AHF312-06          | GU150202                 |
| 6150              | Astraptus alardus            | Eudaminae        | 07-SRNP-35953       | MH MXN311-07          | JF761452                 |
| 6151              | Astraptus alardus            | Eudaminae        | 07-SRNP-56765       | MH MXN315-07          | JF761448                 |
| 6152              | Astraptus alardus            | Eudaminae        | 07-SRNP-65143       | MH MXN317-07          | JF761446                 |
| 6153              | Astraptus alardus            | Eudaminae        | 07-SRNP-35914       | MH MXP222-08          | JF761445                 |
| 6154              | Astraptus alardus            | Eudaminae        | 08-SRNP-45019       | MH MXX859-09          | JF777600                 |
| 6155              | Astraptus alardus            | Eudaminae        | 08-SRNP-36614       | MH MXX484-09          | JF777599                 |
| 6156              | Astraptus creteus cranaDHJ01 | Eudaminae        | 02-SRNP-23100       | MH AHH835-06          | GU154931                 |
| 6157              | Astraptus creteus cranaDHJ01 | Eudaminae        | 97-SRNP-1464        | MH AHI276-06          | GU155779                 |
| 6158              | Astraptus creteus cranaDHJ01 | Eudaminae        | 02-SRNP-23417       | MH AHI274-06          | GU155782                 |
| 6159              | Astraptus creteus cranaDHJ01 | Eudaminae        | 99-SRNP-13962       | MH AHI285-06          | GU155783                 |

| <b>Tree Order</b> | <b>Species</b>               | <b>Subfamily</b> | <b>ACG Sampleid</b> | <b>BOLD Processid</b> | <b>Genbank Accession</b> |
|-------------------|------------------------------|------------------|---------------------|-----------------------|--------------------------|
| 6160              | Astraptes creteus cranaDHJ01 | Eudaminae        | 02-SRNP-23933       | MHAHI279-06           | GU155780                 |
| 6161              | Astraptes creteus cranaDHJ01 | Eudaminae        | 99-SRNP-13961       | MHAHI273-06           | GU155781                 |
| 6162              | Astraptes creteus cranaDHJ01 | Eudaminae        | 03-SRNP-4189        | MHAHH825-06           | GU154930                 |
| 6163              | Astraptes creteus cranaDHJ01 | Eudaminae        | 03-SRNP-4188        | MHAHH824-06           | GU154928                 |
| 6164              | Astraptes creteus cranaDHJ01 | Eudaminae        | 03-SRNP-4333        | MHAHH822-06           | GU154929                 |
| 6165              | Astraptes creteus cranaDHJ01 | Eudaminae        | 05-SRNP-35360       | MHAHF262-06           | GU150210                 |
| 6166              | Astraptes creteus cranaDHJ01 | Eudaminae        | 97-SRNP-1467        | MHMXG347-07           | JF760315                 |
| 6167              | Astraptes creteus cranaDHJ01 | Eudaminae        | 97-SRNP-1465        | MHMXG355-07           | JF760314                 |
| 6168              | Astraptes creteus cranaDHJ01 | Eudaminae        | 98-SRNP-3078        | MHMXG359-07           | JF760313                 |
| 6169              | Astraptes creteus cranaDHJ01 | Eudaminae        | 97-SRNP-1253        | MHMXG363-07           | JF760317                 |
| 6170              | Astraptes creteus cranaDHJ01 | Eudaminae        | 99-SRNP-13963       | MHMXG365-07           | JF760316                 |
| 6171              | Astraptes creteus cranaDHJ02 | Eudaminae        | 98-SRNP-2979        | MHMXG334-07           | JF760327                 |
| 6172              | Astraptes creteus cranaDHJ02 | Eudaminae        | 02-SRNP-23727       | CSCR026-04            | DQ291862                 |
| 6173              | Astraptes creteus cranaDHJ02 | Eudaminae        | 02-SRNP-24378       | CSCR027-04            | DQ291863                 |
| 6174              | Astraptes creteus cranaDHJ02 | Eudaminae        | 02-SRNP-9497        | MHAHH836-06           | GU154932                 |
| 6175              | Astraptes creteus cranaDHJ02 | Eudaminae        | 98-SRNP-3853        | MHMXG362-07           | JF760338                 |
| 6176              | Astraptes creteus cranaDHJ02 | Eudaminae        | 00-SRNP-9497        | MHAHI281-06           | GU155803                 |
| 6177              | Astraptes creteus cranaDHJ02 | Eudaminae        | 00-SRNP-9363        | MHAHI287-06           | GU155788                 |
| 6178              | Astraptes creteus cranaDHJ02 | Eudaminae        | 03-SRNP-4452        | MHAHI289-06           | GU155804                 |
| 6179              | Astraptes creteus cranaDHJ02 | Eudaminae        | 03-SRNP-23876       | MHAHH827-06           | GU154937                 |
| 6180              | Astraptes creteus cranaDHJ02 | Eudaminae        | 03-SRNP-13379       | MHAHH829-06           | GU154938                 |
| 6181              | Astraptes creteus cranaDHJ02 | Eudaminae        | 03-SRNP-23795       | MHAHH823-06           | GU154935                 |
| 6182              | Astraptes creteus cranaDHJ02 | Eudaminae        | 03-SRNP-3042        | MHAHH826-06           | GU154936                 |
| 6183              | Astraptes creteus cranaDHJ02 | Eudaminae        | 03-SRNP-23880       | MHAHH821-06           | GU154934                 |
| 6184              | Astraptes creteus cranaDHJ02 | Eudaminae        | 05-SRNP-35359       | MHAHF263-06           | GU150213                 |
| 6185              | Astraptes creteus cranaDHJ02 | Eudaminae        | 05-SRNP-35230       | MHAHF261-06           | GU150215                 |
| 6186              | Astraptes creteus cranaDHJ02 | Eudaminae        | 05-SRNP-35582       | MHAHF260-06           | GU150216                 |
| 6187              | Astraptes creteus cranaDHJ02 | Eudaminae        | 05-SRNP-35228       | MHAHF259-06           | GU150214                 |
| 6188              | Astraptes creteus cranaDHJ02 | Eudaminae        | 05-SRNP-35253       | MHAHF232-06           | GU150212                 |
| 6189              | Astraptes creteus cranaDHJ02 | Eudaminae        | 04-SRNP-35324       | MHAHE047-05           | GU149422                 |
| 6190              | Astraptes creteus cranaDHJ02 | Eudaminae        | 04-SRNP-35590       | MHAHE046-05           | GU149421                 |
| 6191              | Astraptes creteus cranaDHJ02 | Eudaminae        | 04-SRNP-35599       | MHAHE023-05           | GU149420                 |
| 6192              | Astraptes creteus cranaDHJ02 | Eudaminae        | 00-SRNP-9654        | MHAHI290-06           | GU155787                 |
| 6193              | Astraptes creteus cranaDHJ02 | Eudaminae        | 03-SRNP-4174        | MHAHH828-06           | GU154933                 |
| 6194              | Astraptes creteus cranaDHJ02 | Eudaminae        | 00-SRNP-9951        | MHAHH831-06           | GU154940                 |
| 6195              | Astraptes creteus cranaDHJ02 | Eudaminae        | 00-SRNP-9783        | MHMXG343-07           | JF760336                 |
| 6196              | Astraptes creteus cranaDHJ02 | Eudaminae        | 07-SRNP-57106       | MHAHL564-07           | JF761491                 |
| 6197              | Astraptes creteus cranaDHJ02 | Eudaminae        | 02-SRNP-8259        | MHMXG350-07           | JF760318                 |
| 6198              | Astraptes creteus cranaDHJ02 | Eudaminae        | 98-SRNP-2019        | MHMXG345-07           | JF760333                 |
| 6199              | Astraptes creteus cranaDHJ02 | Eudaminae        | 02-SRNP-9883        | MHAHI278-06           | GU155797                 |
| 6200              | Astraptes creteus cranaDHJ02 | Eudaminae        | 97-SRNP-1362        | MHMXG341-07           | JF760339                 |
| 6201              | Astraptes creteus cranaDHJ02 | Eudaminae        | 99-SRNP-291         | MHMXG339-07           | JF760319                 |
| 6202              | Astraptes creteus cranaDHJ02 | Eudaminae        | 00-SRNP-10716       | MHMXG351-07           | JF760331                 |
| 6203              | Astraptes creteus cranaDHJ02 | Eudaminae        | 02-SRNP-8156        | MHAHI286-06           | GU155790                 |
| 6204              | Astraptes creteus cranaDHJ02 | Eudaminae        | 02-SRNP-23538       | MHAHI275-06           | GU155798                 |
| 6205              | Astraptes creteus cranaDHJ02 | Eudaminae        | 97-SRNP-1617        | MHMXG338-07           | JF760320                 |
| 6206              | Astraptes creteus cranaDHJ02 | Eudaminae        | 98-SRNP-11988       | MHMXG352-07           | JF760330                 |
| 6207              | Astraptes creteus cranaDHJ02 | Eudaminae        | 98-SRNP-2628        | MHMXG337-07           | JF760322                 |
| 6208              | Astraptes creteus cranaDHJ02 | Eudaminae        | 98-SRNP-2871        | MHMXG336-07           | JF760325                 |
| 6209              | Astraptes creteus cranaDHJ02 | Eudaminae        | 98-SRNP-2709        | MHMXG335-07           | JF760326                 |
| 6210              | Astraptes creteus cranaDHJ02 | Eudaminae        | 00-SRNP-9398        | MHAHI288-06           | GU155789                 |
| 6211              | Astraptes creteus cranaDHJ02 | Eudaminae        | 01-SRNP-6265        | MHAHI283-06           | GU155791                 |
| 6212              | Astraptes creteus cranaDHJ02 | Eudaminae        | 01-SRNP-6809        | MHAHI282-06           | GU155794                 |
| 6213              | Astraptes creteus cranaDHJ02 | Eudaminae        | 95-SRNP-537         | MHMXG342-07           | JF760337                 |
| 6214              | Astraptes creteus cranaDHJ02 | Eudaminae        | 94-SRNP-5247        | MHMXG346-07           | JF760332                 |
| 6215              | Astraptes creteus cranaDHJ02 | Eudaminae        | 98-SRNP-2873        | MHMXG356-07           | JF760324                 |

| <b>Tree Order</b> | <b>Species</b>               | <b>Subfamily</b> | <b>ACG Sampleid</b> | <b>BOLD Processid</b> | <b>Genbank Accession</b> |
|-------------------|------------------------------|------------------|---------------------|-----------------------|--------------------------|
| 6216              | Astraptes creteus cranaDHJ02 | Eudaminae        | 07-SRNP-57105       | MHMXN283-07           | JF761495                 |
| 6217              | Astraptes creteus cranaDHJ02 | Eudaminae        | 02-SRNP-24377       | MHAHH830-06           | GU154939                 |
| 6218              | Astraptes creteus cranaDHJ02 | Eudaminae        | 01-SRNP-6805        | MHAHH832-06           | GU154941                 |
| 6219              | Astraptes creteus cranaDHJ02 | Eudaminae        | 01-SRNP-7968        | MHAHH833-06           | GU154942                 |
| 6220              | Astraptes creteus cranaDHJ02 | Eudaminae        | 02-SRNP-8216        | MHAHH837-06           | GU154943                 |
| 6221              | Astraptes creteus cranaDHJ02 | Eudaminae        | 01-SRNP-7967        | MHAHH838-06           | GU154944                 |
| 6222              | Astraptes creteus cranaDHJ02 | Eudaminae        | 02-SRNP-23585       | MHAHI266-06           | GU155784                 |
| 6223              | Astraptes creteus cranaDHJ02 | Eudaminae        | 02-SRNP-24509       | MHAHI267-06           | GU155802                 |
| 6224              | Astraptes creteus cranaDHJ02 | Eudaminae        | 02-SRNP-23630       | MHAHI268-06           | GU155799                 |
| 6225              | Astraptes creteus cranaDHJ02 | Eudaminae        | 01-SRNP-6182        | MHAHI269-06           | GU155801                 |
| 6226              | Astraptes creteus cranaDHJ02 | Eudaminae        | 01-SRNP-6806        | MHAHI271-06           | GU155800                 |
| 6227              | Astraptes creteus cranaDHJ02 | Eudaminae        | 02-SRNP-23118       | MHAHI277-06           | GU155796                 |
| 6228              | Astraptes creteus cranaDHJ02 | Eudaminae        | 02-SRNP-23539       | MHAHI284-06           | GU155793                 |
| 6229              | Astraptes creteus cranaDHJ02 | Eudaminae        | 98-SRNP-2980        | MHMVG340-07           | JF760341                 |
| 6230              | Astraptes creteus cranaDHJ02 | Eudaminae        | 97-SRNP-1252        | MHMVG344-07           | JF760334                 |
| 6231              | Astraptes creteus cranaDHJ02 | Eudaminae        | 97-SRNP-11002       | MHMVG348-07           | JF760344                 |
| 6232              | Astraptes creteus cranaDHJ02 | Eudaminae        | 02-SRNP-8258        | MHMVG349-07           | JF760343                 |
| 6233              | Astraptes creteus cranaDHJ02 | Eudaminae        | 00-SRNP-9624        | MHMVG353-07           | JF760329                 |
| 6234              | Astraptes creteus cranaDHJ02 | Eudaminae        | 98-SRNP-2805        | MHMVG354-07           | JF760328                 |
| 6235              | Astraptes creteus cranaDHJ02 | Eudaminae        | 00-SRNP-9502        | MHMVG357-07           | JF760323                 |
| 6236              | Astraptes creteus cranaDHJ02 | Eudaminae        | 98-SRNP-2055        | MHMVG358-07           | JF760321                 |
| 6237              | Astraptes creteus cranaDHJ02 | Eudaminae        | 98-SRNP-2806        | MHMVG360-07           | JF760342                 |
| 6238              | Astraptes creteus cranaDHJ02 | Eudaminae        | 98-SRNP-3912        | MHMVG361-07           | JF760340                 |
| 6239              | Astraptes creteus cranaDHJ02 | Eudaminae        | 97-SRNP-1835        | MHMVG364-07           | JF760335                 |
| 6240              | Astraptes creteus cranaDHJ02 | Eudaminae        | 06-SRNP-35585       | MHAHJ627-07           | JF752388                 |
| 6241              | Astraptes creteus cranaDHJ02 | Eudaminae        | 06-SRNP-46102       | MHAHJ628-07           | JF752389                 |
| 6242              | Astraptes creteus cranaDHJ02 | Eudaminae        | 07-SRNP-36022       | MHMVG0872-08          | JF761494                 |
| 6243              | Astraptes creteus cranaDHJ02 | Eudaminae        | 07-SRNP-57188       | MHMVG0873-08          | JF761493                 |
| 6244              | Astraptes creteus cranaDHJ02 | Eudaminae        | 07-SRNP-36021       | MHMVG0876-08          | JF761492                 |
| 6245              | Astraptes creteus cranaDHJ02 | Eudaminae        | 07-SRNP-36883       | MHMVG363-09           | JF753666                 |
| 6246              | Astraptes creteus cranaDHJ02 | Eudaminae        | 08-SRNP-35767       | MHMVG481-09           | JF777602                 |
| 6247              | Astraptes creteus cranaDHJ02 | Eudaminae        | 08-SRNP-35790       | MHMVG482-09           | JF777603                 |
| 6248              | Astraptes creteus cranaDHJ02 | Eudaminae        | 08-SRNP-35544       | MHMVG483-09           | JF777604                 |
| 6249              | Astraptes creteus cranaDHJ02 | Eudaminae        | 09-SRNP-56363       | MHMYG2402-10          | HM885824                 |
| 6250              | Astraptes creteus cranaDHJ02 | Eudaminae        | 09-SRNP-56364       | MHMYG2403-10          | HM885825                 |
| 6251              | Astraptes creteus cranaDHJ02 | Eudaminae        | 02-SRNP-9064        | MHAHI280-06           | GU155795                 |
| 6252              | Astraptes creteus cranaDHJ02 | Eudaminae        | 04-SRNP-36066       | MHAHF246-06           | GU150211                 |
| 6253              | Astraptes creteus cranaDHJ02 | Eudaminae        | 09-SRNP-36873       | MHMYG2026-10          | HM885428                 |
| 6254              | Astraptes talus              | Eudaminae        | 03-SRNP-1776        | CSCR312-04            | DQ291887                 |
| 6255              | Astraptes talus              | Eudaminae        | 02-SRNP-28715       | CSCR036-04            | DQ291886                 |
| 6256              | Astraptes talus              | Eudaminae        | 05-SRNP-22282       | MHAHF867-06           | GU150249                 |
| 6257              | Astraptes talus              | Eudaminae        | 07-SRNP-42996       | MHMVG797-08           | JF761632                 |
| 6258              | Astraptes talus              | Eudaminae        | 06-SRNP-21979       | MHMVG058-07           | JF761634                 |
| 6259              | Astraptes talus              | Eudaminae        | 06-SRNP-56333       | MHAHH563-06           | GU155108                 |
| 6260              | Astraptes talus              | Eudaminae        | 05-SRNP-22277       | MHAHF873-06           | GU150250                 |
| 6261              | Astraptes talus              | Eudaminae        | 05-SRNP-22036       | MHAHF872-06           | GU150252                 |
| 6262              | Astraptes talus              | Eudaminae        | 05-SRNP-22279       | MHAHF871-06           | GU150251                 |
| 6263              | Astraptes talus              | Eudaminae        | 05-SRNP-22031       | MHAHF870-06           | GU150246                 |
| 6264              | Astraptes talus              | Eudaminae        | 05-SRNP-22257       | MHAHF869-06           | GU150247                 |
| 6265              | Astraptes talus              | Eudaminae        | 05-SRNP-22033       | MHAHF868-06           | GU150248                 |
| 6266              | Astraptes talus              | Eudaminae        | 07-SRNP-1322        | MHMVG059-07           | JF761633                 |
| 6267              | Astraptes talus              | Eudaminae        | 05-SRNP-25199       | MHAHL095-07           | JF761628                 |
| 6268              | Astraptes talus              | Eudaminae        | 05-SRNP-25202       | MHAHL096-07           | JF761629                 |
| 6269              | Astraptes talus              | Eudaminae        | 07-SRNP-43000       | MHMVG217-08           | JF761631                 |
| 6270              | Astraptes talus              | Eudaminae        | 08-SRNP-40181       | MHMVG218-08           | JF761630                 |
| 6271              | Astraptes talus              | Eudaminae        | 09-SRNP-41979       | MHMYE1407-09          | HM424356                 |



| <b>Tree Order</b> | <b>Species</b>         | <b>Subfamily</b> | <b>ACG Sampleid</b> | <b>BOLD Processid</b> | <b>Genbank Accession</b> |
|-------------------|------------------------|------------------|---------------------|-----------------------|--------------------------|
| 6272              | Astraptus talus        | Eudaminae        | 09-SRNP-41975       | MHMYE1408-09          | HM424357                 |
| 6273              | Astraptus talus        | Eudaminae        | 09-SRNP-41973       | MHMYE1409-09          | HM424358                 |
| 6274              | Astraptus talus        | Eudaminae        | 09-SRNP-41980       | MHMYE1410-09          | HM424359                 |
| 6275              | Astraptus talus        | Eudaminae        | 09-SRNP-41977       | MHMYE1411-09          | HM424360                 |
| 6276              | Astraptus talus        | Eudaminae        | 09-SRNP-41974       | MHMYE1412-09          | HM424361                 |
| 6277              | Astraptus talus        | Eudaminae        | 09-SRNP-41983       | MHMYE1405-09          | HM424354                 |
| 6278              | Astraptus talus        | Eudaminae        | 09-SRNP-41978       | MHMYE1406-09          | HM424355                 |
| 6279              | Astraptus talus        | Eudaminae        | 09-SRNP-41982       | MHMYE1413-09          | HM424362                 |
| 6280              | Autochton longipennis  | Pyrginae         | 01-SRNP-2960        | CSRII105-04           | DQ291903                 |
| 6281              | Achalarus albociliatus | Eudaminae        | 05-SRNP-56408       | MHAHF347-06           | GU150158                 |
| 6282              | Achalarus albociliatus | Eudaminae        | 96-SRNP-1083        | CSCR001-04            | DQ291759                 |
| 6283              | Achalarus albociliatus | Eudaminae        | 00-SRNP-6810        | CSRII522-04           | DQ291760                 |
| 6284              | Achalarus albociliatus | Eudaminae        | 02-SRNP-14451       | MHAHE113-05           | GU149306                 |
| 6285              | Achalarus albociliatus | Eudaminae        | 02-SRNP-14113       | MHAHE112-05           | GU149304                 |
| 6286              | Achalarus albociliatus | Eudaminae        | 02-SRNP-14234       | MHAHE111-05           | GU149305                 |
| 6287              | Achalarus albociliatus | Eudaminae        | 00-SRNP-6827        | CSRII523-04           | DQ291761                 |
| 6288              | Achalarus albociliatus | Eudaminae        | 02-SRNP-4786        | MHAHE114-05           | GU149307                 |
| 6289              | Achalarus albociliatus | Eudaminae        | 07-SRNP-12984       | MHMXS074-08           | JF761321                 |
| 6290              | Achalarus toxus        | Eudaminae        | 96-SRNP-8690        | CSCR004-04            | DQ291763                 |
| 6291              | Achalarus toxus        | Eudaminae        | 93-SRNP-7539        | CSCR003-04            | DQ291762                 |
| 6292              | Achalarus toxus        | Eudaminae        | 02-SRNP-10179       | MHAHE117-05           | GU149309                 |
| 6293              | Achalarus toxus        | Eudaminae        | 02-SRNP-10180       | MHAHE118-05           | GU149308                 |
| 6294              | Achalarus toxus        | Eudaminae        | 03-SRNP-237         | MHAHE122-05           | GU149310                 |
| 6295              | Thessia jalapus        | Pyrginae         | 08-SRNP-22900       | MHMXY1080-09          | GU666462                 |
| 6296              | Thessia jalapus        | Pyrginae         | 97-SRNP-4702        | CSCR265-04            | DQ293592                 |
| 6297              | Thessia jalapus        | Pyrginae         | 08-SRNP-22673       | MHMXX653-09           | JF778550                 |
| 6298              | Thessia jalapus        | Pyrginae         | 08-SRNP-30977       | MHMXX453-09           | JF754324                 |
| 6299              | Thessia jalapus        | Pyrginae         | 08-SRNP-30974       | MHMXX451-09           | JF754322                 |
| 6300              | Thessia jalapus        | Pyrginae         | 02-SRNP-13559       | MHAHE119-05           | GU150120                 |
| 6301              | Thessia jalapus        | Pyrginae         | 08-SRNP-30979       | MHMXX449-09           | JF754320                 |
| 6302              | Thessia jalapus        | Pyrginae         | 09-SRNP-30937       | MHMYC468-09           |                          |
| 6303              | Thessia jalapus        | Pyrginae         | 09-SRNP-20372       | MHMYG2411-10          | HM885834                 |
| 6304              | Thessia jalapus        | Pyrginae         | 08-SRNP-23350       | MHMYB132-09           | GU649689                 |
| 6305              | Thessia jalapus        | Pyrginae         | 09-SRNP-20138       | MHMYG2410-10          | HM885832                 |
| 6306              | Thessia jalapus        | Pyrginae         | 08-SRNP-24707       | MHMYB131-09           | GU649695                 |
| 6307              | Thessia jalapus        | Pyrginae         | 04-SRNP-22865       | MHMXY954-09           | GU666568                 |
| 6308              | Thessia jalapus        | Pyrginae         | 08-SRNP-55016       | MHMXX452-09           | JF754323                 |
| 6309              | Thessia jalapus        | Pyrginae         | 08-SRNP-30973       | MHMXX448-09           | JF754319                 |
| 6310              | Thessia jalapus        | Pyrginae         | 07-SRNP-55386       | MHMXX055-07           | JF763248                 |
| 6311              | Thessia jalapus        | Pyrginae         | 02-SRNP-13729       | MHAHE121-05           | GU150121                 |
| 6312              | Thessia jalapus        | Pyrginae         | 02-SRNP-13560       | MHAHE120-05           | GU150119                 |
| 6313              | Thessia jalapus        | Pyrginae         | 02-SRNP-4830        | MHAHE116-05           | GU150117                 |
| 6314              | Thessia jalapus        | Pyrginae         | 02-SRNP-14049       | MHAHE115-05           | GU150118                 |
| 6315              | Thessia jalapus        | Pyrginae         | 04-SRNP-14601       | MHAHD876-05           | GU161890                 |
| 6316              | Thessia jalapus        | Pyrginae         | 07-SRNP-21140       | MHMXX054-07           | JF763249                 |
| 6317              | Thessia jalapus        | Pyrginae         | 97-SRNP-4570        | CSCR264-04            | DQ293591                 |
| 6318              | Thessia jalapus        | Pyrginae         | 08-SRNP-21898       | MHMXX450-09           | JF754321                 |
| 6319              | Thessia jalapus        | Pyrginae         | 09-SRNP-20140       | MHMYG2412-10          | HM885835                 |
| 6320              | Astraptus phalaecus    | Eudaminae        | 00-SRNP-17853       | CSCR034-04            | DQ291885                 |
| 6321              | Astraptus phalaecus    | Eudaminae        | 09-SRNP-33034       | MHMYG2414-10          | HM885837                 |
| 6322              | Astraptus phalaecus    | Eudaminae        | 09-SRNP-33035       | MHMYG2415-10          | HM885838                 |
| 6323              | Urbanus albimargo      | Eudaminae        | 99-SRNP-6189        | CSRII351-04           | DQ293631                 |
| 6324              | Urbanus albimargo      | Eudaminae        | 05-SRNP-55418       | MHAHF281-06           | GU150957                 |
| 6325              | Urbanus albimargo      | Eudaminae        | 97-SRNP-4266        | CSCR273-04            | DQ293630                 |
| 6326              | Urbanus albimargo      | Eudaminae        | 06-SRNP-2798        | MHAHG663-06           | GU151802                 |
| 6327              | Urbanus albimargo      | Eudaminae        | 08-SRNP-4797        | MHMXX630-09           | JF778576                 |

| <b>Tree Order</b> | <b>Species</b>        | <b>Subfamily</b> | <b>ACG Sampleid</b> | <b>BOLD Processid</b> | <b>Genbank Accession</b> |
|-------------------|-----------------------|------------------|---------------------|-----------------------|--------------------------|
| 6328              | Urbanus albimargo     | Eudaminae        | 08-SRNP-4799        | MHMXX631-09           | HQ992120                 |
| 6329              | Urbanus albimargo     | Eudaminae        | 08-SRNP-4798        | MHMXX632-09           | JF778577                 |
| 6330              | Urbanus doryssusDHJ01 | Eudaminae        | 09-SRNP-65298       | MHMYC463-09           | GU649870                 |
| 6331              | Urbanus doryssusDHJ01 | Eudaminae        | 08-SRNP-66077       | MHMXY957-09           | GU666563                 |
| 6332              | Urbanus doryssusDHJ01 | Eudaminae        | 08-SRNP-65793       | MHMXY956-09           | GU666570                 |
| 6333              | Urbanus doryssusDHJ01 | Eudaminae        | 08-SRNP-32448       | MHMXY955-09           | GU666569                 |
| 6334              | Urbanus doryssusDHJ01 | Eudaminae        | 08-SRNP-65792       | MHMXX633-09           | JF778580                 |
| 6335              | Urbanus doryssusDHJ01 | Eudaminae        | 08-SRNP-30716       | MHMXX509-09           | JF754359                 |
| 6336              | Urbanus doryssusDHJ01 | Eudaminae        | 08-SRNP-65388       | MHMXX504-09           | JF754358                 |
| 6337              | Urbanus doryssusDHJ01 | Eudaminae        | 08-SRNP-41168       | MHMXX498-09           | JF754357                 |
| 6338              | Urbanus doryssusDHJ01 | Eudaminae        | 08-SRNP-30697       | MHMXX497-09           | JF754356                 |
| 6339              | Urbanus doryssusDHJ01 | Eudaminae        | 08-SRNP-65154       | MHMXX075-08           | JF763333                 |
| 6340              | Urbanus doryssusDHJ01 | Eudaminae        | 07-SRNP-33176       | MHMXX801-08           | JF763334                 |
| 6341              | Urbanus doryssusDHJ01 | Eudaminae        | 07-SRNP-65317       | MHMXX800-08           | JF763335                 |
| 6342              | Urbanus doryssusDHJ01 | Eudaminae        | 07-SRNP-32796       | MHMXX0829-08          | JF763336                 |
| 6343              | Urbanus doryssusDHJ01 | Eudaminae        | 07-SRNP-65529       | MHMXX0828-08          | JF763337                 |
| 6344              | Urbanus doryssusDHJ01 | Eudaminae        | 07-SRNP-41431       | MHAHL475-07           | JF763332                 |
| 6345              | Urbanus doryssusDHJ01 | Eudaminae        | 07-SRNP-32630       | MHAHL474-07           | JF763331                 |
| 6346              | Urbanus doryssusDHJ01 | Eudaminae        | 07-SRNP-32039       | MHAHL473-07           | JF763330                 |
| 6347              | Urbanus doryssusDHJ01 | Eudaminae        | 07-SRNP-30997       | MHAHL472-07           | JF763329                 |
| 6348              | Urbanus doryssusDHJ01 | Eudaminae        | 07-SRNP-21334       | MHAHL468-07           | JF763326                 |
| 6349              | Urbanus doryssusDHJ01 | Eudaminae        | 02-SRNP-6305        | MHAHI309-06           | GU156389                 |
| 6350              | Urbanus doryssusDHJ01 | Eudaminae        | 06-SRNP-31223       | MHAHH558-06           | GU155699                 |
| 6351              | Urbanus doryssusDHJ01 | Eudaminae        | 07-SRNP-32446       | MHAHL470-07           | JF763327                 |
| 6352              | Urbanus doryssusDHJ01 | Eudaminae        | 04-SRNP-42344       | MHAHI310-06           | GU156390                 |
| 6353              | Urbanus doryssusDHJ01 | Eudaminae        | 07-SRNP-41459       | MHAHL471-07           | JF763328                 |
| 6354              | Urbanus doryssusDHJ01 | Eudaminae        | 05-SRNP-70279       | MHAHG149-06           | GU151827                 |
| 6355              | Urbanus doryssusDHJ01 | Eudaminae        | 09-SRNP-30058       | MHMYC465-09           | GU649872                 |
| 6356              | Urbanus doryssusDHJ01 | Eudaminae        | 09-SRNP-33053       | MHMYC467-09           | GU649867                 |
| 6357              | Urbanus doryssusDHJ01 | Eudaminae        | 09-SRNP-31697       | MHMYE1489-09          | GU653513                 |
| 6358              | Urbanus doryssusDHJ01 | Eudaminae        | 09-SRNP-31399       | MHMYE1491-09          | GU653511                 |
| 6359              | Urbanus doryssusDHJ01 | Eudaminae        | 09-SRNP-80602       | MHMYG2392-10          | HM885816                 |
| 6360              | Urbanus doryssusDHJ01 | Eudaminae        | 09-SRNP-32813       | MHMYG2393-10          | HM885817                 |
| 6361              | Urbanus doryssusDHJ03 | Eudaminae        | 04-SRNP-46471       | MHAHC036-05           | DQ293718                 |
| 6362              | Urbanus doryssusDHJ03 | Eudaminae        | 04-SRNP-46473       | MHAHC052-05           | DQ293720                 |
| 6363              | Urbanus doryssusDHJ02 | Eudaminae        | 05-SRNP-2102        | MHAHF512-06           | GU150982                 |
| 6364              | Urbanus doryssusDHJ02 | Eudaminae        | 05-SRNP-65996       | MHAHF758-06           | GU150995                 |
| 6365              | Urbanus doryssusDHJ02 | Eudaminae        | 06-SRNP-1298        | MHAHG183-06           | GU151829                 |
| 6366              | Urbanus doryssusDHJ02 | Eudaminae        | 07-SRNP-59558       | MHMXX799-08           | JF763340                 |
| 6367              | Urbanus doryssusDHJ02 | Eudaminae        | 04-SRNP-46474       | MHAHC029-05           | DQ293717                 |
| 6368              | Urbanus doryssusDHJ02 | Eudaminae        | 06-SRNP-3568        | MHAHI153-06           | GU156391                 |
| 6369              | Urbanus doryssusDHJ02 | Eudaminae        | 09-SRNP-44478       | MHMYE1488-09          | GU653516                 |
| 6370              | Urbanus doryssusDHJ02 | Eudaminae        | 09-SRNP-44475       | MHMYE1490-09          | GU653514                 |
| 6371              | Urbanus doryssusDHJ02 | Eudaminae        | 96-SRNP-11042       | CSCR277-04            | DQ293715                 |
| 6372              | Urbanus doryssusDHJ02 | Eudaminae        | 05-SRNP-2322        | MHAHF516-06           | GU150985                 |
| 6373              | Urbanus doryssusDHJ02 | Eudaminae        | 09-SRNP-65637       | MHMYC466-09           | GU649866                 |
| 6374              | Urbanus doryssusDHJ02 | Eudaminae        | 05-SRNP-20746       | MHAHF515-06           | GU150989                 |
| 6375              | Urbanus doryssusDHJ02 | Eudaminae        | 08-SRNP-1784        | MHMXX507-09           | JF754367                 |
| 6376              | Urbanus doryssusDHJ02 | Eudaminae        | 08-SRNP-1779        | MHMXX508-09           | JF754368                 |
| 6377              | Urbanus doryssusDHJ02 | Eudaminae        | 09-SRNP-20147       | MHMXY958-09           | GU666564                 |
| 6378              | Urbanus doryssusDHJ02 | Eudaminae        | 09-SRNP-65199       | MHMYC461-09           | GU649876                 |
| 6379              | Urbanus doryssusDHJ02 | Eudaminae        | 08-SRNP-1324        | MHMXX502-09           | JF754363                 |
| 6380              | Urbanus doryssusDHJ02 | Eudaminae        | 08-SRNP-1771        | MHMXX503-09           | JF754364                 |
| 6381              | Urbanus doryssusDHJ02 | Eudaminae        | 08-SRNP-1774        | MHMXX500-09           | JF754361                 |
| 6382              | Urbanus doryssusDHJ02 | Eudaminae        | 08-SRNP-2350        | MHMXX501-09           | JF754362                 |
| 6383              | Urbanus doryssusDHJ02 | Eudaminae        | 07-SRNP-1310        | MHMXX263-07           | JF763341                 |

| <b>Tree Order</b> | <b>Species</b>        | <b>Subfamily</b> | <b>ACG Sampleid</b> | <b>BOLD Processid</b> | <b>Genbank Accession</b> |
|-------------------|-----------------------|------------------|---------------------|-----------------------|--------------------------|
| 6384              | Urbanus doryssusDHJ02 | Eudaminae        | 07-SRNP-1447        | MHAHL467-07           | JF763338                 |
| 6385              | Urbanus doryssusDHJ02 | Eudaminae        | 06-SRNP-3275        | MHAHI154-06           | GU156393                 |
| 6386              | Urbanus doryssusDHJ02 | Eudaminae        | 06-SRNP-3569        | MHAHI151-06           | GU156395                 |
| 6387              | Urbanus doryssusDHJ02 | Eudaminae        | 06-SRNP-20390       | MHAHG184-06           | GU151830                 |
| 6388              | Urbanus doryssusDHJ02 | Eudaminae        | 05-SRNP-2104        | MHAHF518-06           | GU150990                 |
| 6389              | Urbanus doryssusDHJ02 | Eudaminae        | 05-SRNP-2309        | MHAHF517-06           | GU150992                 |
| 6390              | Urbanus doryssusDHJ02 | Eudaminae        | 05-SRNP-2103        | MHAHF514-06           | GU150993                 |
| 6391              | Urbanus doryssusDHJ02 | Eudaminae        | 05-SRNP-2105        | MHAHF513-06           | GU150994                 |
| 6392              | Urbanus doryssusDHJ02 | Eudaminae        | 05-SRNP-46461       | MHAHF511-06           | GU150984                 |
| 6393              | Urbanus doryssusDHJ02 | Eudaminae        | 05-SRNP-2108        | MHAHF510-06           | GU150987                 |
| 6394              | Urbanus doryssusDHJ02 | Eudaminae        | 05-SRNP-2339        | MHAHF509-06           | GU150991                 |
| 6395              | Urbanus doryssusDHJ02 | Eudaminae        | 05-SRNP-46459       | MHAHF507-06           | GU150983                 |
| 6396              | Urbanus doryssusDHJ02 | Eudaminae        | 05-SRNP-2106        | MHAHF506-06           | GU150988                 |
| 6397              | Urbanus doryssusDHJ02 | Eudaminae        | 08-SRNP-2185        | MHMXW505-09           | JF754365                 |
| 6398              | Urbanus doryssusDHJ02 | Eudaminae        | 06-SRNP-3214        | MHAHI150-06           | GU156392                 |
| 6399              | Urbanus doryssusDHJ02 | Eudaminae        | 08-SRNP-1781        | MHMXW506-09           | JF754366                 |
| 6400              | Urbanus doryssusDHJ02 | Eudaminae        | 07-SRNP-1739        | MHAHL469-07           | JF763339                 |
| 6401              | Urbanus doryssusDHJ02 | Eudaminae        | 06-SRNP-1796        | MHAHG662-06           | GU151828                 |
| 6402              | Urbanus doryssusDHJ02 | Eudaminae        | 93-SRNP-4324        | CSRII324-04           | DQ293716                 |
| 6403              | Urbanus doryssusDHJ02 | Eudaminae        | 09-SRNP-65198       | MHMYC462-09           | GU649869                 |
| 6404              | Urbanus doryssusDHJ02 | Eudaminae        | 09-SRNP-65161       | MHMYC464-09           | GU649871                 |
| 6405              | Urbanus doryssusDHJ02 | Eudaminae        | 09-SRNP-68103       | MHMYG2394-10          | HM885818                 |
| 6406              | Urbanus doryssusDHJ02 | Eudaminae        | 05-SRNP-58857       | MHAHF508-06           | GU150986                 |
| 6407              | Urbanus doryssusDHJ02 | Eudaminae        | 04-SRNP-22318       | MHAHC044-05           | DQ293719                 |
| 6408              | Urbanus doryssusDHJ02 | Eudaminae        | 04-SRNP-22317       | MHAHC060-05           | DQ293721                 |
| 6409              | Urbanus doryssusDHJ02 | Eudaminae        | 04-SRNP-48319       | MHAHD899-05           | GU161984                 |
| 6410              | Urbanus doryssusDHJ02 | Eudaminae        | 06-SRNP-3376        | MHAHI152-06           | GU156394                 |
| 6411              | Urbanus doryssusDHJ02 | Eudaminae        | 08-SRNP-2186        | MHMXW499-09           | JF754360                 |
| 6412              | Urbanus doryssusDHJ02 | Eudaminae        | 09-SRNP-23060       | MHMYG2022-10          | HM885424                 |
| 6413              | Urbanus teleus        | Eudaminae        | 01-SRNP-16521       | MHAHD406-05           | GU162016                 |
| 6414              | Urbanus teleus        | Eudaminae        | 97-SRNP-3309        | CSRII346-04           | DQ293843                 |
| 6415              | Urbanus teleus        | Eudaminae        | 00-SRNP-4055        | MHAHD407-05           | GU162017                 |
| 6416              | Urbanus teleus        | Eudaminae        | 00-SRNP-4054        | MHAHD408-05           | GU162015                 |
| 6417              | Urbanus teleus        | Eudaminae        | 04-SRNP-30475       | MHAHE100-05           | GU150139                 |
| 6418              | Urbanus teleus        | Eudaminae        | 07-SRNP-55852       | MHMXK327-07           | JF763394                 |
| 6419              | Urbanus teleus        | Eudaminae        | 07-SRNP-55853       | MHMXK328-07           | JF763393                 |
| 6420              | Urbanus teleus        | Eudaminae        | 07-SRNP-58338       | MHMXO823-08           | JF763392                 |
| 6421              | Autochton zarex       | Pyrginae         | 04-SRNP-42624       | MHAHE196-05           | GU149437                 |
| 6422              | Autochton zarex       | Pyrginae         | 05-SRNP-57363       | MHAHE376-05           | GU149436                 |
| 6423              | Autochton zarex       | Pyrginae         | 05-SRNP-43733       | MHAHG677-06           | GU151211                 |
| 6424              | Autochton zarex       | Pyrginae         | 07-SRNP-58889       | MHMXP156-08           | JF761682                 |
| 6425              | Autochton zarex       | Pyrginae         | 05-SRNP-59312       | MHAHE595-06           | GU149438                 |
| 6426              | Autochton zarex       | Pyrginae         | 06-SRNP-23079       | MHAHJ554-07           | JF752479                 |
| 6427              | Autochton zarex       | Pyrginae         | 03-SRNP-8036        | CSCR481-04            | DQ291904                 |
| 6428              | Autochton zarex       | Pyrginae         | 95-SRNP-7760        | CSRII106-04           | DQ291905                 |
| 6429              | Autochton zarex       | Pyrginae         | 97-SRNP-5452        | CSRII108-04           | DQ291907                 |
| 6430              | Autochton zarex       | Pyrginae         | 97-SRNP-4767        | CSRII107-04           | DQ291906                 |
| 6431              | Autochton zarex       | Pyrginae         | 06-SRNP-22476       | MHAHJ714-07           | JF752480                 |
| 6432              | Autochton zarex       | Pyrginae         | 08-SRNP-70876       | MHMXW510-09           | JF753725                 |
| 6433              | Urbanus dorantes      | Eudaminae        | 05-SRNP-34161       | MHAHF739-06           | GU150980                 |
| 6434              | Urbanus dorantes      | Eudaminae        | 05-SRNP-6828        | MHAHF738-06           | GU150981                 |
| 6435              | Urbanus dorantes      | Eudaminae        | 07-SRNP-65123       | MHAHL462-07           | JF763321                 |
| 6436              | Urbanus dorantes      | Eudaminae        | 02-SRNP-1897        | CSCR274-04            | DQ293713                 |
| 6437              | Urbanus dorantes      | Eudaminae        | 02-SRNP-15449       | CSCR275-04            | DQ293714                 |
| 6438              | Urbanus dorantes      | Eudaminae        | 06-SRNP-1986        | MHAHG670-06           | GU151826                 |
| 6439              | Urbanus dorantes      | Eudaminae        | 06-SRNP-30970       | MHAHG669-06           | GU151825                 |

| <b>Tree Order</b> | <b>Species</b>          | <b>Subfamily</b> | <b>ACG Sampleid</b> | <b>BOLD Processid</b> | <b>Genbank Accession</b> |
|-------------------|-------------------------|------------------|---------------------|-----------------------|--------------------------|
| 6440              | Urbanus dorantes        | Eudaminae        | 05-SRNP-59442       | MHAHF346-06           | GU150978                 |
| 6441              | Urbanus dorantes        | Eudaminae        | 04-SRNP-16100       | MHAHE104-05           | GU150134                 |
| 6442              | Urbanus dorantes        | Eudaminae        | 05-SRNP-42411       | MHAHF345-06           | GU150979                 |
| 6443              | Urbanus dorantes        | Eudaminae        | 06-SRNP-3492        | MHAHH555-06           | GU155698                 |
| 6444              | Urbanus dorantes        | Eudaminae        | 07-SRNP-32150       | MHMXXK324-07          | JF763325                 |
| 6445              | Urbanus dorantes        | Eudaminae        | 07-SRNP-56431       | MHMXXK325-07          | JF763324                 |
| 6446              | Urbanus dorantes        | Eudaminae        | 07-SRNP-45404       | MHMXO825-08           | JF763323                 |
| 6447              | Urbanus dorantes        | Eudaminae        | 07-SRNP-45405       | MHMXO826-08           | JF763322                 |
| 6448              | Urbanus dorantes        | Eudaminae        | 08-SRNP-72130       | MHMXX629-09           | JF778579                 |
| 6449              | Astraptus egregiusDHJ01 | Eudaminae        | 06-SRNP-41788       | MHAHH557-06           | GU154945                 |
| 6450              | Astraptus egregiusDHJ01 | Eudaminae        | 05-SRNP-40504       | MHAHE440-05           | GU149423                 |
| 6451              | Astraptus egregiusDHJ01 | Eudaminae        | 04-SRNP-56511       | MHAHE101-05           | GU149424                 |
| 6452              | Astraptus egregiusDHJ01 | Eudaminae        | 07-SRNP-21401       | MHMXXN286-07          | JF761496                 |
| 6453              | Astraptus egregiusDHJ02 | Eudaminae        | 02-SRNP-15436       | CSCRO29-04            | DQ291865                 |
| 6454              | Astraptus egregiusDHJ02 | Eudaminae        | 03-SRNP-21843       | CSRII239-04           | DQ291866                 |
| 6455              | Astraptus egregiusDHJ02 | Eudaminae        | 96-SRNP-11827       | CSCRO28-04            | DQ291864                 |
| 6456              | Astraptus egregiusDHJ02 | Eudaminae        | 05-SRNP-59306       | MHAHE594-06           | GU149425                 |
| 6457              | Astraptus egregiusDHJ02 | Eudaminae        | 06-SRNP-40597       | MHAHG672-06           | GU151102                 |
| 6458              | Astraptus egregiusDHJ02 | Eudaminae        | 07-SRNP-40219       | MHMXXK096-07          | JF761497                 |
| 6459              | Astraptus egregiusDHJ02 | Eudaminae        | 08-SRNP-36561       | MHMXX635-09           | JF777605                 |
| 6460              | Urbanus simplicius      | Eudaminae        | 04-SRNP-45191       | MHAHE053-05           | GU150137                 |
| 6461              | Urbanus simplicius      | Eudaminae        | 04-SRNP-30838       | MHAHE051-05           | GU150136                 |
| 6462              | Urbanus simplicius      | Eudaminae        | 02-SRNP-5635        | CSCR279-04            | DQ293842                 |
| 6463              | Urbanus simplicius      | Eudaminae        | 07-SRNP-20188       | MHMXXK266-07          | JF763389                 |
| 6464              | Urbanus simplicius      | Eudaminae        | 07-SRNP-20175       | MHMXXK265-07          | JF763390                 |
| 6465              | Urbanus simplicius      | Eudaminae        | 07-SRNP-20181       | MHMXXK264-07          | JF763391                 |
| 6466              | Urbanus simplicius      | Eudaminae        | 07-SRNP-20078       | MHAHK361-07           | JF761284                 |
| 6467              | Urbanus simplicius      | Eudaminae        | 06-SRNP-20658       | MHAHH571-06           | GU155718                 |
| 6468              | Urbanus simplicius      | Eudaminae        | 06-SRNP-58893       | MHAHK074-07           | JF761283                 |
| 6469              | Urbanus simplicius      | Eudaminae        | 04-SRNP-45789       | MHAHE052-05           | GU150138                 |
| 6470              | Urbanus simplicius      | Eudaminae        | 02-SRNP-4745        | CSCR278-04            | DQ293841                 |
| 6471              | Urbanus simplicius      | Eudaminae        | 07-SRNP-20177       | MHMXXK267-07          | JF763388                 |
| 6472              | Urbanus simplicius      | Eudaminae        | 08-SRNP-58533       | MHMYC525-09           | GU649775                 |
| 6473              | Urbanus simplicius      | Eudaminae        | 08-SRNP-24796       | MHMYG2025-10          | HM885427                 |
| 6474              | Astraptus aulus         | Eudaminae        | 97-SRNP-10301       | CSCRO23-04            | DQ291858                 |
| 6475              | Astraptus aulus         | Eudaminae        | 06-SRNP-55030       | MHAHG109-06           | GU151089                 |
| 6476              | Astraptus aulus         | Eudaminae        | 94-SRNP-7852        | CSCRO22-04            | DQ291857                 |
| 6477              | Astraptus aulus         | Eudaminae        | 05-SRNP-12046       | MHAHF286-06           | GU150205                 |
| 6478              | Astraptus aulus         | Eudaminae        | 05-SRNP-64313       | MHAHG653-06           | GU151088                 |
| 6479              | Astraptus aulus         | Eudaminae        | 06-SRNP-60359       | MHAHK213-07           | JF760310                 |
| 6480              | Astraptus janeiraDHJ01  | Eudaminae        | 06-SRNP-6959        | MHAHJ891-07           | JF752406                 |
| 6481              | Astraptus janeiraDHJ01  | Eudaminae        | 09-SRNP-65806       | MHMYC531-09           | GU649815                 |
| 6482              | Astraptus janeiraDHJ02  | Eudaminae        | 08-SRNP-65223       | MHMXXS092-08          | JF761587                 |
| 6483              | Astraptus janeiraDHJ02  | Eudaminae        | 08-SRNP-31029       | MHMXX951-09           | JF777630                 |
| 6484              | Astraptus janeiraDHJ02  | Eudaminae        | 08-SRNP-40223       | MHMXX950-09           | JF777629                 |
| 6485              | Astraptus janeiraDHJ02  | Eudaminae        | 08-SRNP-65370       | MHMXXS091-08          | JF761588                 |
| 6486              | Astraptus janeiraDHJ02  | Eudaminae        | 04-SRNP-1932        | MHAHC058-05           | DQ291884                 |
| 6487              | Astraptus janeiraDHJ02  | Eudaminae        | 03-SRNP-21497       | CSCR479-04            | DQ291882                 |
| 6488              | Astraptus janeiraDHJ02  | Eudaminae        | 05-SRNP-43094       | MHAHF667-06           | GU150245                 |
| 6489              | Astraptus janeiraDHJ02  | Eudaminae        | 05-SRNP-21164       | MHAHF227-06           | GU150243                 |
| 6490              | Astraptus janeiraDHJ02  | Eudaminae        | 05-SRNP-21166       | MHAHF226-06           | GU150242                 |
| 6491              | Astraptus janeiraDHJ02  | Eudaminae        | 99-SRNP-2448        | CSCRO32-04            | DQ291881                 |
| 6492              | Astraptus janeiraDHJ02  | Eudaminae        | 02-SRNP-5607        | XAA802-04             | DQ291883                 |
| 6493              | Astraptus janeiraDHJ02  | Eudaminae        | 05-SRNP-32361       | MHAHF663-06           | GU150244                 |
| 6494              | Astraptus janeiraDHJ02  | Eudaminae        | 06-SRNP-2015        | MHAHG655-06           | GU151127                 |
| 6495              | Astraptus janeiraDHJ02  | Eudaminae        | 09-SRNP-67362       | MHMYE1437-09          | GU653557                 |

| <b>Tree Order</b> | <b>Species</b>    | <b>Subfamily</b> | <b>ACG Sampleid</b> | <b>BOLD Processid</b> | <b>Genbank Accession</b> |
|-------------------|-------------------|------------------|---------------------|-----------------------|--------------------------|
| 6496              | Astraptes enotrus | Eudaminae        | 03-SRNP-3278        | MHMXX094-08           | JF751160                 |
| 6497              | Astraptes enotrus | Eudaminae        | 08-SRNP-4337        | MHMXX693-09           | JF777607                 |
| 6498              | Astraptes enotrus | Eudaminae        | 08-SRNP-66239       | MHMXX011-09           | GU665264                 |
| 6499              | Astraptes enotrus | Eudaminae        | 08-SRNP-2132        | MHMXX945-09           | JF777621                 |
| 6500              | Astraptes enotrus | Eudaminae        | 02-SRNP-29258       | MHMXX086-08           | JF751152                 |
| 6501              | Astraptes enotrus | Eudaminae        | 08-SRNP-4382        | MHMXX692-09           | JF777606                 |
| 6502              | Astraptes enotrus | Eudaminae        | 07-SRNP-45300       | MHMXP135-08           | JF761506                 |
| 6503              | Astraptes enotrus | Eudaminae        | 07-SRNP-57189       | MHMXP131-08           | JF761507                 |
| 6504              | Astraptes enotrus | Eudaminae        | 07-SRNP-2586        | MHAHL514-07           | JF761501                 |
| 6505              | Astraptes enotrus | Eudaminae        | 03-SRNP-8361        | MHMXX070-08           | JF751137                 |
| 6506              | Astraptes enotrus | Eudaminae        | 07-SRNP-45178       | MHMXX110-07           | JF761509                 |
| 6507              | Astraptes enotrus | Eudaminae        | 03-SRNP-1513        | CSCR309-04            | DQ291867                 |
| 6508              | Astraptes enotrus | Eudaminae        | 04-SRNP-32395       | MHAHC002-05           | DQ291869                 |
| 6509              | Astraptes enotrus | Eudaminae        | 05-SRNP-31823       | MHAHF235-06           | GU150217                 |
| 6510              | Astraptes enotrus | Eudaminae        | 04-SRNP-30579       | MHAHC090-05           | DQ291876                 |
| 6511              | Astraptes enotrus | Eudaminae        | 04-SRNP-33020       | MHAHC082-05           | DQ291875                 |
| 6512              | Astraptes enotrus | Eudaminae        | 04-SRNP-30578       | MHAHC074-05           | DQ291874                 |
| 6513              | Astraptes enotrus | Eudaminae        | 04-SRNP-31311       | MHAHC066-05           | DQ291873                 |
| 6514              | Astraptes enotrus | Eudaminae        | 04-SRNP-32345       | MHAHC050-05           | DQ291872                 |
| 6515              | Astraptes enotrus | Eudaminae        | 04-SRNP-22616       | MHAHC042-05           | DQ291871                 |
| 6516              | Astraptes enotrus | Eudaminae        | 04-SRNP-1431        | MHAHC034-05           | DQ291870                 |
| 6517              | Astraptes enotrus | Eudaminae        | 04-SRNP-4633        | MHMXX043-08           | JF751111                 |
| 6518              | Astraptes enotrus | Eudaminae        | 01-SRNP-9736        | MHMXX090-08           | JF751156                 |
| 6519              | Astraptes enotrus | Eudaminae        | 06-SRNP-23089       | MHAHJ500-07           | JF752390                 |
| 6520              | Astraptes enotrus | Eudaminae        | 04-SRNP-47730       | MHMXX084-08           | JF751151                 |
| 6521              | Astraptes enotrus | Eudaminae        | 03-SRNP-20571       | MHMXX087-08           | JF751153                 |
| 6522              | Astraptes enotrus | Eudaminae        | 03-SRNP-19578       | MHMXX088-08           | JF751154                 |
| 6523              | Astraptes enotrus | Eudaminae        | 08-SRNP-2124        | MHMXX938-09           | JF777614                 |
| 6524              | Astraptes enotrus | Eudaminae        | 06-SRNP-36179       | MHAHK201-07           | JF760345                 |
| 6525              | Astraptes enotrus | Eudaminae        | 01-SRNP-1057        | MHMXX058-08           | JF751125                 |
| 6526              | Astraptes enotrus | Eudaminae        | 03-SRNP-10882       | MHMXX089-08           | JF751155                 |
| 6527              | Astraptes enotrus | Eudaminae        | 04-SRNP-4407        | MHMXX083-08           | JF751150                 |
| 6528              | Astraptes enotrus | Eudaminae        | 04-SRNP-4531        | MHMXX060-08           | JF751127                 |
| 6529              | Astraptes enotrus | Eudaminae        | 04-SRNP-15289       | MHMXX059-08           | JF751126                 |
| 6530              | Astraptes enotrus | Eudaminae        | 04-SRNP-23231       | MHAHC786-05           | DQ291877                 |
| 6531              | Astraptes enotrus | Eudaminae        | 03-SRNP-5824        | CSCR310-04            | DQ291868                 |
| 6532              | Astraptes enotrus | Eudaminae        | 06-SRNP-40208       | MHAHG126-06           | GU151104                 |
| 6533              | Astraptes enotrus | Eudaminae        | 07-SRNP-31387       | MHAHL516-07           | JF761503                 |
| 6534              | Astraptes enotrus | Eudaminae        | 95-SRNP-7803        | MHMXX062-08           | JF751129                 |
| 6535              | Astraptes enotrus | Eudaminae        | 99-SRNP-4986        | MHMXX069-08           | JF751136                 |
| 6536              | Astraptes enotrus | Eudaminae        | 00-SRNP-1877        | MHMXX077-08           | JF751144                 |
| 6537              | Astraptes enotrus | Eudaminae        | 98-SRNP-4808        | MHMXX068-08           | JF751135                 |
| 6538              | Astraptes enotrus | Eudaminae        | 02-SRNP-18995       | MHMXX076-08           | JF751143                 |
| 6539              | Astraptes enotrus | Eudaminae        | 07-SRNP-35000       | MHAHK233-07           | JF760346                 |
| 6540              | Astraptes enotrus | Eudaminae        | 03-SRNP-20573       | MHMXX078-08           | JF751145                 |
| 6541              | Astraptes enotrus | Eudaminae        | 06-SRNP-23433       | MHMXX104-07           | JF761512                 |
| 6542              | Astraptes enotrus | Eudaminae        | 03-SRNP-5834        | MHMXX091-08           | JF751157                 |
| 6543              | Astraptes enotrus | Eudaminae        | 08-SRNP-1658        | MHMXX939-09           | JF777615                 |
| 6544              | Astraptes enotrus | Eudaminae        | 08-SRNP-65001       | MHMXX236-08           | JF761504                 |
| 6545              | Astraptes enotrus | Eudaminae        | 04-SRNP-23876       | MHMXX040-08           | JF751108                 |
| 6546              | Astraptes enotrus | Eudaminae        | 04-SRNP-48434       | MHMXX041-08           | JF751109                 |
| 6547              | Astraptes enotrus | Eudaminae        | 04-SRNP-48802       | MHMXX042-08           | JF751110                 |
| 6548              | Astraptes enotrus | Eudaminae        | 04-SRNP-4532        | MHMXX044-08           | JF751112                 |
| 6549              | Astraptes enotrus | Eudaminae        | 03-SRNP-37547       | MHMXX045-08           | JF751113                 |
| 6550              | Astraptes enotrus | Eudaminae        | 02-SRNP-30318       | MHMXX047-08           | JF751114                 |
| 6551              | Astraptes enotrus | Eudaminae        | 03-SRNP-23940       | MHMXX048-08           | JF751115                 |

| <b>Tree Order</b> | <b>Species</b>    | <b>Subfamily</b> | <b>ACG Sampleid</b> | <b>BOLD Processid</b> | <b>Genbank Accession</b> |
|-------------------|-------------------|------------------|---------------------|-----------------------|--------------------------|
| 6552              | Astraptes enotrus | Eudaminae        | 07-SRNP-30922       | MHMXX108-07           | JF761511                 |
| 6553              | Astraptes enotrus | Eudaminae        | 07-SRNP-895         | MHMXX109-07           | JF761510                 |
| 6554              | Astraptes enotrus | Eudaminae        | 06-SRNP-23363       | MHMXX111-07           | JF761508                 |
| 6555              | Astraptes enotrus | Eudaminae        | 07-SRNP-32164       | MHAHL511-07           | JF761498                 |
| 6556              | Astraptes enotrus | Eudaminae        | 07-SRNP-31091       | MHAHL512-07           | JF761499                 |
| 6557              | Astraptes enotrus | Eudaminae        | 07-SRNP-40850       | MHAHL513-07           | JF761500                 |
| 6558              | Astraptes enotrus | Eudaminae        | 07-SRNP-2585        | MHAHL515-07           | JF761502                 |
| 6559              | Astraptes enotrus | Eudaminae        | 07-SRNP-23362       | MHMXX846-08           | JF761505                 |
| 6560              | Astraptes enotrus | Eudaminae        | 03-SRNP-4337        | MHMXX049-08           | JF751116                 |
| 6561              | Astraptes enotrus | Eudaminae        | 00-SRNP-3195        | MHMXX050-08           | JF751117                 |
| 6562              | Astraptes enotrus | Eudaminae        | 03-SRNP-20168       | MHMXX051-08           | JF751118                 |
| 6563              | Astraptes enotrus | Eudaminae        | 03-SRNP-5007        | MHMXX052-08           | JF751119                 |
| 6564              | Astraptes enotrus | Eudaminae        | 03-SRNP-38023       | MHMXX053-08           | JF751120                 |
| 6565              | Astraptes enotrus | Eudaminae        | 01-SRNP-1374        | MHMXX054-08           | JF751121                 |
| 6566              | Astraptes enotrus | Eudaminae        | 01-SRNP-578         | MHMXX055-08           | JF751122                 |
| 6567              | Astraptes enotrus | Eudaminae        | 04-SRNP-4535        | MHMXX056-08           | JF751123                 |
| 6568              | Astraptes enotrus | Eudaminae        | 04-SRNP-15007       | MHMXX057-08           | JF751124                 |
| 6569              | Astraptes enotrus | Eudaminae        | 04-SRNP-61500       | MHMXX061-08           | JF751128                 |
| 6570              | Astraptes enotrus | Eudaminae        | 04-SRNP-55371       | MHMXX063-08           | JF751130                 |
| 6571              | Astraptes enotrus | Eudaminae        | 02-SRNP-29261       | MHMXX064-08           | JF751131                 |
| 6572              | Astraptes enotrus | Eudaminae        | 02-SRNP-4701        | MHMXX065-08           | JF751132                 |
| 6573              | Astraptes enotrus | Eudaminae        | 02-SRNP-29260       | MHMXX066-08           | JF751133                 |
| 6574              | Astraptes enotrus | Eudaminae        | 02-SRNP-18992       | MHMXX067-08           | JF751134                 |
| 6575              | Astraptes enotrus | Eudaminae        | 04-SRNP-14410       | MHMXX071-08           | JF751138                 |
| 6576              | Astraptes enotrus | Eudaminae        | 02-SRNP-19031       | MHMXX072-08           | JF751139                 |
| 6577              | Astraptes enotrus | Eudaminae        | 02-SRNP-4310        | MHMXX073-08           | JF751140                 |
| 6578              | Astraptes enotrus | Eudaminae        | 00-SRNP-12241       | MHMXX074-08           | JF751141                 |
| 6579              | Astraptes enotrus | Eudaminae        | 02-SRNP-29259       | MHMXX075-08           | JF751142                 |
| 6580              | Astraptes enotrus | Eudaminae        | 03-SRNP-21678       | MHMXX079-08           | JF751146                 |
| 6581              | Astraptes enotrus | Eudaminae        | 03-SRNP-27838       | MHMXX080-08           | JF751147                 |
| 6582              | Astraptes enotrus | Eudaminae        | 01-SRNP-569         | MHMXX081-08           | JF751148                 |
| 6583              | Astraptes enotrus | Eudaminae        | 04-SRNP-16060       | MHMXX082-08           | JF751149                 |
| 6584              | Astraptes enotrus | Eudaminae        | 03-SRNP-7340        | MHMXX092-08           | JF751158                 |
| 6585              | Astraptes enotrus | Eudaminae        | 03-SRNP-1596        | MHMXX093-08           | JF751159                 |
| 6586              | Astraptes enotrus | Eudaminae        | 07-SRNP-60787       | MHMXX933-09           | JF777609                 |
| 6587              | Astraptes enotrus | Eudaminae        | 08-SRNP-65002       | MHMXX934-09           | JF777610                 |
| 6588              | Astraptes enotrus | Eudaminae        | 08-SRNP-30981       | MHMXX935-09           | JF777611                 |
| 6589              | Astraptes enotrus | Eudaminae        | 08-SRNP-40360       | MHMXX936-09           | JF777612                 |
| 6590              | Astraptes enotrus | Eudaminae        | 08-SRNP-2125        | MHMXX937-09           | JF777613                 |
| 6591              | Astraptes enotrus | Eudaminae        | 08-SRNP-2321        | MHMXX940-09           | JF777616                 |
| 6592              | Astraptes enotrus | Eudaminae        | 08-SRNP-65460       | MHMXX941-09           | JF777617                 |
| 6593              | Astraptes enotrus | Eudaminae        | 08-SRNP-65411       | MHMXX942-09           | JF777618                 |
| 6594              | Astraptes enotrus | Eudaminae        | 08-SRNP-20582       | MHMXX943-09           | JF777619                 |
| 6595              | Astraptes enotrus | Eudaminae        | 08-SRNP-20893       | MHMXX944-09           | JF777620                 |
| 6596              | Astraptes enotrus | Eudaminae        | 08-SRNP-1656        | MHMXX946-09           | JF777622                 |
| 6597              | Astraptes enotrus | Eudaminae        | 08-SRNP-40359       | MHMXX947-09           | JF777623                 |
| 6598              | Astraptes enotrus | Eudaminae        | 08-SRNP-1657        | MHMXX948-09           | JF777624                 |
| 6599              | Astraptes enotrus | Eudaminae        | 08-SRNP-56038       | MHMXX694-09           | JF777608                 |
| 6600              | Astraptes enotrus | Eudaminae        | 05-SRNP-30647       | MHAHF248-06           | GU150220                 |
| 6601              | Astraptes enotrus | Eudaminae        | 05-SRNP-30648       | MHAHF249-06           | GU150218                 |
| 6602              | Astraptes enotrus | Eudaminae        | 05-SRNP-791         | MHAHF252-06           | GU150219                 |
| 6603              | Astraptes enotrus | Eudaminae        | 05-SRNP-30598       | MHAHF254-06           | GU150221                 |
| 6604              | Astraptes enotrus | Eudaminae        | 09-SRNP-32555       | MHMYE1467-09          | GU653533                 |
| 6605              | Astraptes enotrus | Eudaminae        | 09-SRNP-20260       | MHMYG2471-10          | HM885898                 |
| 6606              | Astraptes enotrus | Eudaminae        | 06-SRNP-2122        | MHAHG654-06           | GU151103                 |
| 6607              | Astraptes enotrus | Eudaminae        | 06-SRNP-32266       | MHAHI107-06           | GU155806                 |

| <b>Tree Order</b> | <b>Species</b>     | <b>Subfamily</b> | <b>ACG Sampleid</b> | <b>BOLD Processid</b> | <b>Genbank Accession</b> |
|-------------------|--------------------|------------------|---------------------|-----------------------|--------------------------|
| 6608              | Astraptes enotrus  | Eudaminae        | 06-SRNP-35215       | MHAHI111-06           | GU155805                 |
| 6609              | Astraptes enotrus  | Eudaminae        | 06-SRNP-22782       | MHAHJ652-07           | JF752391                 |
| 6610              | Astraptes enotrus  | Eudaminae        | 09-SRNP-22799       | MHMYG2472-10          | HM885899                 |
| 6611              | Astraptes enotrus  | Eudaminae        | 09-SRNP-20286       | MHMYG2506-10          | HM885935                 |
| 6612              | Chioides catillus  | Eudaminae        | 07-SRNP-57955       | MHMXO831-08           | JF761930                 |
| 6613              | Chioides catillus  | Eudaminae        | 07-SRNP-20324       | MHMXK320-07           | JF761935                 |
| 6614              | Chioides catillus  | Eudaminae        | 06-SRNP-21086       | MHAHH554-06           | GU155330                 |
| 6615              | Chioides catillus  | Eudaminae        | 07-SRNP-938         | MHMXO833-08           | JF761928                 |
| 6616              | Chioides catillus  | Eudaminae        | 07-SRNP-58548       | MHMXR792-08           | JF761927                 |
| 6617              | Chioides catillus  | Eudaminae        | 07-SRNP-32811       | MHMXO830-08           | JF761931                 |
| 6618              | Chioides catillus  | Eudaminae        | 07-SRNP-939         | MHMXO832-08           | JF761929                 |
| 6619              | Chioides catillus  | Eudaminae        | 07-SRNP-20124       | MHMXK323-07           | JF761932                 |
| 6620              | Chioides catillus  | Eudaminae        | 07-SRNP-22429       | MHAHL465-07           | JF761925                 |
| 6621              | Chioides catillus  | Eudaminae        | 07-SRNP-20115       | MHMXK322-07           | JF761933                 |
| 6622              | Chioides catillus  | Eudaminae        | 07-SRNP-20187       | MHMXK321-07           | JF761934                 |
| 6623              | Chioides catillus  | Eudaminae        | 07-SRNP-20128       | MHMXK319-07           | JF761936                 |
| 6624              | Chioides catillus  | Eudaminae        | 07-SRNP-45146       | MHAHK073-07           | JF760538                 |
| 6625              | Chioides catillus  | Eudaminae        | 05-SRNP-45682       | MHAHF343-06           | GU150333                 |
| 6626              | Chioides catillus  | Eudaminae        | 04-SRNP-34914       | MHAHE050-05           | GU149531                 |
| 6627              | Chioides catillus  | Eudaminae        | 04-SRNP-56106       | MHAHE049-05           | GU149533                 |
| 6628              | Chioides catillus  | Eudaminae        | 04-SRNP-23839       | MHAHC295-05           | DQ292124                 |
| 6629              | Chioides catillus  | Eudaminae        | 04-SRNP-34756       | MHAHC285-05           | DQ292122                 |
| 6630              | Chioides catillus  | Eudaminae        | 04-SRNP-23173       | MHAHC293-05           | DQ292123                 |
| 6631              | Chioides catillus  | Eudaminae        | 04-SRNP-24064       | MHAHC297-05           | DQ292125                 |
| 6632              | Chioides catillus  | Eudaminae        | 03-SRNP-1704        | CSCR342-04            | DQ292121                 |
| 6633              | Chioides catillus  | Eudaminae        | 04-SRNP-23511       | MHAHE048-05           | GU149532                 |
| 6634              | Chioides catillus  | Eudaminae        | 03-SRNP-1498        | CSCR341-04            | DQ292120                 |
| 6635              | Chioides catillus  | Eudaminae        | 05-SRNP-31764       | MHAHF344-06           | GU150332                 |
| 6636              | Chioides catillus  | Eudaminae        | 07-SRNP-58581       | MHMXR793-08           | JF761926                 |
| 6637              | Chioides zilpa     | Eudaminae        | 02-SRNP-10079       | CSCR068-04            | DQ292127                 |
| 6638              | Chioides zilpa     | Eudaminae        | 07-SRNP-45681       | MHMXR795-08           | JF761938                 |
| 6639              | Chioides zilpa     | Eudaminae        | 04-SRNP-45690       | MHAHE103-05           | GU149534                 |
| 6640              | Chioides zilpa     | Eudaminae        | 04-SRNP-45597       | MHAHC021-05           | DQ292130                 |
| 6641              | Chioides zilpa     | Eudaminae        | 04-SRNP-45616       | MHAHC013-05           | DQ292129                 |
| 6642              | Chioides zilpa     | Eudaminae        | 04-SRNP-45596       | MHAHC005-05           | DQ292128                 |
| 6643              | Chioides zilpa     | Eudaminae        | 04-SRNP-45594       | MHAHC093-05           | DQ292134                 |
| 6644              | Chioides zilpa     | Eudaminae        | 04-SRNP-45618       | MHAHC085-05           | DQ292133                 |
| 6645              | Chioides zilpa     | Eudaminae        | 04-SRNP-45595       | MHAHC077-05           | DQ292132                 |
| 6646              | Chioides zilpa     | Eudaminae        | 04-SRNP-45749       | MHAHC069-05           | DQ292131                 |
| 6647              | Chioides zilpa     | Eudaminae        | 02-SRNP-10078       | CSCR067-04            | DQ292126                 |
| 6648              | Chioides zilpa     | Eudaminae        | 07-SRNP-45680       | MHMXR796-08           | JF761937                 |
| 6649              | Chioides zilpa     | Eudaminae        | 07-SRNP-45864       | MHMXO827-08           | JF761939                 |
| 6650              | Chioides zilpa     | Eudaminae        | 09-SRNP-57613       | MHMYE1442-09          | GU653553                 |
| 6651              | Epargyreus Burns04 | Pyrginae         | 02-SRNP-29831       | CSCR535-04            | DQ292483                 |
| 6652              | Epargyreus Burns04 | Pyrginae         | 02-SRNP-29832       | CSCR536-04            | DQ292484                 |
| 6653              | Epargyreus Burns04 | Pyrginae         | 01-SRNP-14765       | CSCR526-04            | DQ292480                 |
| 6654              | Epargyreus Burns04 | Pyrginae         | 03-SRNP-30086       | MHAHD488-05           | GU161506                 |
| 6655              | Epargyreus Burns04 | Pyrginae         | 03-SRNP-29910       | MHAHD489-05           | GU161505                 |
| 6656              | Epargyreus Burns04 | Pyrginae         | 03-SRNP-29907       | MHAHD490-05           | GU161504                 |
| 6657              | Epargyreus Burns04 | Pyrginae         | 01-SRNP-17907       | MHAHD492-05           | GU161501                 |
| 6658              | Epargyreus Burns05 | Pyrginae         | 02-SRNP-4752        | MHAHD474-05           | GU161509                 |
| 6659              | Epargyreus Burns04 | Pyrginae         | 03-SRNP-29911       | MHAHD487-05           | GU161503                 |
| 6660              | Epargyreus Burns04 | Pyrginae         | 07-SRNP-45120       | MHMXK133-07           | JF762209                 |
| 6661              | Epargyreus Burns04 | Pyrginae         | 02-SRNP-16314       | CSCR534-04            | DQ292482                 |
| 6662              | Epargyreus Burns04 | Pyrginae         | 04-SRNP-24319       | MHAHC771-05           | DQ292485                 |
| 6663              | Epargyreus Burns04 | Pyrginae         | 96-SRNP-9218        | CSCR527-04            | DQ292481                 |

| <b>Tree Order</b> | <b>Species</b>     | <b>Subfamily</b> | <b>ACG Sampleid</b> | <b>BOLD Processid</b> | <b>Genbank Accession</b> |
|-------------------|--------------------|------------------|---------------------|-----------------------|--------------------------|
| 6664              | Epargyreus Burns04 | Pyrginae         | 01-SRNP-16938       | MHAHD491-05           | GU161502                 |
| 6665              | Epargyreus Burns04 | Pyrginae         | 07-SRNP-20185       | MHMXX135-07           | JF762208                 |
| 6666              | Epargyreus Burns04 | Pyrginae         | 07-SRNP-20050       | MHMXX139-07           | JF762207                 |
| 6667              | Epargyreus Burns04 | Pyrginae         | 07-SRNP-20051       | MHMXN324-07           | JF762206                 |
| 6668              | Epargyreus Burns07 | Pyrginae         | 07-SRNP-21582       | MHMXN331-07           | JF762218                 |
| 6669              | Epargyreus Burns07 | Pyrginae         | 07-SRNP-21586       | MHMXN332-07           | JF762217                 |
| 6670              | Epargyreus Burns07 | Pyrginae         | 04-SRNP-55660       | MHAHC770-05           | DQ292497                 |
| 6671              | Epargyreus Burns07 | Pyrginae         | 05-SRNP-30037       | MHAHL074-07           | JF762214                 |
| 6672              | Epargyreus Burns07 | Pyrginae         | 05-SRNP-21988       | MHAHL078-07           | JF762215                 |
| 6673              | Epargyreus Burns07 | Pyrginae         | 04-SRNP-15059       | MHAHC784-05           | DQ292498                 |
| 6674              | Epargyreus Burns07 | Pyrginae         | 04-SRNP-1184        | MHAHC757-05           | DQ292496                 |
| 6675              | Epargyreus Burns07 | Pyrginae         | 02-SRNP-16668       | CSCR533-04            | DQ292495                 |
| 6676              | Epargyreus Burns07 | Pyrginae         | 02-SRNP-16077       | CSCR532-04            | DQ292494                 |
| 6677              | Epargyreus Burns07 | Pyrginae         | 06-SRNP-32932       | MHAHI508-06           | GU155963                 |
| 6678              | Epargyreus Burns07 | Pyrginae         | 07-SRNP-21670       | MHMXN333-07           | JF762216                 |
| 6679              | Epargyreus Burns07 | Pyrginae         | 08-SRNP-2670        | MHMXX974-09           | JF777919                 |
| 6680              | Epargyreus Burns07 | Pyrginae         | 08-SRNP-31981       | MHMXY1118-09          | GU666425                 |
| 6681              | Epargyreus Burns05 | Pyrginae         | 06-SRNP-46832       | MHAHJ620-07           | JF752772                 |
| 6682              | Epargyreus Burns05 | Pyrginae         | 06-SRNP-46827       | MHAHJ619-07           | JF752771                 |
| 6683              | Epargyreus Burns05 | Pyrginae         | 02-SRNP-29177       | MHAHD478-05           | GU161510                 |
| 6684              | Epargyreus Burns05 | Pyrginae         | 02-SRNP-29170       | MHAHD475-05           | GU161507                 |
| 6685              | Epargyreus Burns05 | Pyrginae         | 02-SRNP-29171       | MHAHD473-05           | GU161514                 |
| 6686              | Epargyreus Burns05 | Pyrginae         | 02-SRNP-4753        | MHAHD471-05           | GU161511                 |
| 6687              | Epargyreus Burns05 | Pyrginae         | 02-SRNP-5328        | CSCR529-04            | DQ292488                 |
| 6688              | Epargyreus Burns05 | Pyrginae         | 02-SRNP-17323       | CSCR460-04            | DQ292486                 |
| 6689              | Epargyreus Burns05 | Pyrginae         | 02-SRNP-4118        | MHAHD472-05           | GU161513                 |
| 6690              | Epargyreus Burns05 | Pyrginae         | 02-SRNP-15163       | MHAHD476-05           | GU161512                 |
| 6691              | Epargyreus Burns05 | Pyrginae         | 07-SRNP-56896       | MHMXN325-07           | JF762211                 |
| 6692              | Epargyreus Burns05 | Pyrginae         | 07-SRNP-46910       | MHMXX973-09           | JF777917                 |
| 6693              | Epargyreus Burns05 | Pyrginae         | 05-SRNP-65949       | MHAHL066-07           | JF762210                 |
| 6694              | Epargyreus Burns05 | Pyrginae         | 02-SRNP-28000       | CSCR528-04            | DQ292487                 |
| 6695              | Epargyreus Burns05 | Pyrginae         | 02-SRNP-4513        | CSCR538-04            | DQ292489                 |
| 6696              | Epargyreus Burns05 | Pyrginae         | 04-SRNP-14225       | MHAHC763-05           | DQ292490                 |
| 6697              | Epargyreus Burns05 | Pyrginae         | 02-SRNP-29175       | MHAHD477-05           | GU161508                 |
| 6698              | Epargyreus Burns05 | Pyrginae         | 08-SRNP-15158       | MHMXY1119-09          | GU666426                 |
| 6699              | Epargyreus Burns06 | Pyrginae         | 97-SRNP-1659        | CSCR531-04            | DQ292492                 |
| 6700              | Epargyreus Burns06 | Pyrginae         | 02-SRNP-8179        | CSCR530-04            | DQ292491                 |
| 6701              | Epargyreus Burns06 | Pyrginae         | 03-SRNP-20073       | CSRII397-04           | DQ292493                 |
| 6702              | Epargyreus Burns06 | Pyrginae         | 07-SRNP-1276        | MHMXX134-07           | JF762213                 |
| 6703              | Epargyreus Burns06 | Pyrginae         | 07-SRNP-427         | MHMXX141-07           | JF762212                 |
| 6704              | Epargyreus Burns06 | Pyrginae         | 08-SRNP-1110        | MHMXX1179-09          | JF777918                 |
| 6705              | Epargyreus Burns11 | Pyrginae         | 01-SRNP-16427       | CSRII364-04           | DQ292439                 |
| 6706              | Epargyreus Burns11 | Pyrginae         | 07-SRNP-20344       | MHMXX140-07           | JF762227                 |
| 6707              | Epargyreus Burns11 | Pyrginae         | 07-SRNP-20063       | MHMXX138-07           | JF762228                 |
| 6708              | Epargyreus Burns11 | Pyrginae         | 04-SRNP-14219       | MHAHC762-05           | DQ292442                 |
| 6709              | Epargyreus Burns11 | Pyrginae         | 07-SRNP-20341       | MHMXR804-08           | JF762222                 |
| 6710              | Epargyreus Burns11 | Pyrginae         | 07-SRNP-23521       | MHMXR803-08           | JF762223                 |
| 6711              | Epargyreus Burns11 | Pyrginae         | 05-SRNP-45151       | MHAHL075-07           | JF762219                 |
| 6712              | Epargyreus Burns11 | Pyrginae         | 07-SRNP-20334       | MHMXX136-07           | JF762229                 |
| 6713              | Epargyreus Burns11 | Pyrginae         | 05-SRNP-45152       | MHAHL081-07           | JF762220                 |
| 6714              | Epargyreus Burns11 | Pyrginae         | 07-SRNP-20333       | MHMXN327-07           | JF762225                 |
| 6715              | Epargyreus Burns11 | Pyrginae         | 06-SRNP-67531       | MHAHK224-07           | JF760675                 |
| 6716              | Epargyreus Burns11 | Pyrginae         | 04-SRNP-21554       | MHAHC754-05           | DQ292441                 |
| 6717              | Epargyreus Burns11 | Pyrginae         | 01-SRNP-16541       | CSRII365-04           | DQ292440                 |
| 6718              | Epargyreus Burns11 | Pyrginae         | 06-SRNP-58925       | MHAHK225-07           | JF760676                 |
| 6719              | Epargyreus Burns11 | Pyrginae         | 07-SRNP-20296       | MHMXN326-07           | JF762226                 |



| <b>Tree Order</b> | <b>Species</b>     | <b>Subfamily</b> | <b>ACG Sampleid</b> | <b>BOLD Processid</b> | <b>Genbank Accession</b> |
|-------------------|--------------------|------------------|---------------------|-----------------------|--------------------------|
| 6720              | Epargyreus Burns11 | Pyrginae         | 07-SRNP-20364       | MHMXN328-07           | JF762224                 |
| 6721              | Epargyreus Burns11 | Pyrginae         | 07-SRNP-20329       | MHMXT220-08           | JF762221                 |
| 6722              | Epargyreus Burns11 | Pyrginae         | 09-SRNP-55106       | MHMYE895-09           | GU653709                 |
| 6723              | Epargyreus Burns12 | Pyrginae         | 08-SRNP-24800       | MHMYB153-09           | GU649684                 |
| 6724              | Epargyreus Burns12 | Pyrginae         | 07-SRNP-46132       | MHMXT219-08           | JF762230                 |
| 6725              | Epargyreus Burns12 | Pyrginae         | 07-SRNP-21329       | MHMXX329-07           | JF762232                 |
| 6726              | Epargyreus Burns12 | Pyrginae         | 07-SRNP-65538       | MHMXR802-08           | JF762231                 |
| 6727              | Epargyreus Burns12 | Pyrginae         | 08-SRNP-24801       | MHMYB154-09           | GU649685                 |
| 6728              | Epargyreus Burns03 | Pyrginae         | 08-SRNP-45027       | MHMXX968-09           | JF777916                 |
| 6729              | Epargyreus Burns03 | Pyrginae         | 07-SRNP-57869       | MHMXP140-08           | JF762204                 |
| 6730              | Epargyreus Burns03 | Pyrginae         | 94-SRNP-8731        | CSRII331-04           | DQ292464                 |
| 6731              | Epargyreus Burns03 | Pyrginae         | 04-SRNP-45025       | MHAHC761-05           | DQ292471                 |
| 6732              | Epargyreus Burns03 | Pyrginae         | 04-SRNP-47759       | MHAHC752-05           | DQ292468                 |
| 6733              | Epargyreus Burns03 | Pyrginae         | 07-SRNP-57031       | MHMXN330-07           | JF762205                 |
| 6734              | Epargyreus Burns03 | Pyrginae         | 05-SRNP-45698       | MHAHL064-07           | JF762203                 |
| 6735              | Epargyreus Burns03 | Pyrginae         | 06-SRNP-47189       | MHAHJ626-07           | JF752770                 |
| 6736              | Epargyreus Burns03 | Pyrginae         | 04-SRNP-46436       | MHAHC782-05           | DQ292479                 |
| 6737              | Epargyreus Burns03 | Pyrginae         | 04-SRNP-46435       | MHAHC778-05           | DQ292478                 |
| 6738              | Epargyreus Burns03 | Pyrginae         | 04-SRNP-46800       | MHAHC777-05           | DQ292477                 |
| 6739              | Epargyreus Burns03 | Pyrginae         | 04-SRNP-46437       | MHAHC776-05           | DQ292476                 |
| 6740              | Epargyreus Burns03 | Pyrginae         | 04-SRNP-46819       | MHAHC775-05           | DQ292475                 |
| 6741              | Epargyreus Burns03 | Pyrginae         | 04-SRNP-48332       | MHAHC773-05           | DQ292474                 |
| 6742              | Epargyreus Burns03 | Pyrginae         | 04-SRNP-47032       | MHAHC767-05           | DQ292473                 |
| 6743              | Epargyreus Burns03 | Pyrginae         | 04-SRNP-47031       | MHAHC766-05           | DQ292472                 |
| 6744              | Epargyreus Burns03 | Pyrginae         | 04-SRNP-46799       | MHAHC756-05           | DQ292470                 |
| 6745              | Epargyreus Burns03 | Pyrginae         | 04-SRNP-46820       | MHAHC755-05           | DQ292469                 |
| 6746              | Epargyreus Burns03 | Pyrginae         | 94-SRNP-8741        | CSRII332-04           | DQ292465                 |
| 6747              | Epargyreus Burns03 | Pyrginae         | 96-SRNP-10052       | CSRII344-04           | DQ292466                 |
| 6748              | Epargyreus Burns03 | Pyrginae         | 04-SRNP-48150       | MHAHC751-05           | DQ292467                 |
| 6749              | Epargyreus Burns03 | Pyrginae         | 08-SRNP-58522       | MHMYC530-09           | GU649814                 |
| 6750              | Epargyreus Burns02 | Pyrginae         | 01-SRNP-3183        | CSCR516-04            | DQ292445                 |
| 6751              | Epargyreus Burns02 | Pyrginae         | 02-SRNP-29202       | CSCR519-04            | DQ292448                 |
| 6752              | Epargyreus Burns02 | Pyrginae         | 05-SRNP-30057       | MHAHL069-07           | JF762197                 |
| 6753              | Epargyreus Burns02 | Pyrginae         | 04-SRNP-27300       | MHAHL080-07           | JF762200                 |
| 6754              | Epargyreus Burns02 | Pyrginae         | 07-SRNP-61270       | MHMXX969-09           | JF777915                 |
| 6755              | Epargyreus Burns02 | Pyrginae         | 08-SRNP-4758        | MHMXX655-09           | JF777912                 |
| 6756              | Epargyreus Burns02 | Pyrginae         | 09-SRNP-71932       | MHMYE1443-09          | GU653554                 |
| 6757              | Epargyreus Burns02 | Pyrginae         | 01-SRNP-18804       | CSCR515-04            | DQ292444                 |
| 6758              | Epargyreus Burns02 | Pyrginae         | 01-SRNP-18806       | CSCR459-04            | DQ292443                 |
| 6759              | Epargyreus Burns02 | Pyrginae         | 02-SRNP-15408       | CSCR517-04            | DQ292446                 |
| 6760              | Epargyreus Burns02 | Pyrginae         | 08-SRNP-72029       | MHMXX656-09           | JF777913                 |
| 6761              | Epargyreus Burns02 | Pyrginae         | 04-SRNP-15015       | MHAHC783-05           | DQ292462                 |
| 6762              | Epargyreus Burns02 | Pyrginae         | 07-SRNP-57672       | MHMXP141-08           | JF762202                 |
| 6763              | Epargyreus Burns02 | Pyrginae         | 04-SRNP-15177       | MHAHC769-05           | DQ292457                 |
| 6764              | Epargyreus Burns02 | Pyrginae         | 05-SRNP-33218       | MHAHL062-07           | JF762193                 |
| 6765              | Epargyreus Burns02 | Pyrginae         | 07-SRNP-42506       | MHMXR805-08           | JF762201                 |
| 6766              | Epargyreus Burns02 | Pyrginae         | 02-SRNP-524         | CSCR521-04            | DQ292450                 |
| 6767              | Epargyreus Burns02 | Pyrginae         | 02-SRNP-525         | CSCR522-04            | DQ292451                 |
| 6768              | Epargyreus Burns02 | Pyrginae         | 04-SRNP-24265       | MHAHC780-05           | DQ292460                 |
| 6769              | Epargyreus Burns02 | Pyrginae         | 92-SRNP-2367        | CSCR523-04            | DQ292452                 |
| 6770              | Epargyreus Burns02 | Pyrginae         | 05-SRNP-2701        | MHAHL077-07           | JF762199                 |
| 6771              | Epargyreus Burns02 | Pyrginae         | 04-SRNP-13417       | MHAHC759-05           | DQ292454                 |
| 6772              | Epargyreus Burns02 | Pyrginae         | 04-SRNP-24405       | MHAHC758-05           | DQ292453                 |
| 6773              | Epargyreus Burns02 | Pyrginae         | 02-SRNP-29200       | CSCR518-04            | DQ292447                 |
| 6774              | Epargyreus Burns02 | Pyrginae         | 02-SRNP-32945       | CSCR520-04            | DQ292449                 |
| 6775              | Epargyreus Burns02 | Pyrginae         | 04-SRNP-14174       | MHAHC764-05           | DQ292455                 |

| <b>Tree Order</b> | <b>Species</b>       | <b>Subfamily</b> | <b>ACG Sampleid</b> | <b>BOLD Processid</b> | <b>Genbank Accession</b> |
|-------------------|----------------------|------------------|---------------------|-----------------------|--------------------------|
| 6776              | Epargyreus Burns02   | Pyrginae         | 04-SRNP-15077       | MHAHC768-05           | DQ292456                 |
| 6777              | Epargyreus Burns02   | Pyrginae         | 04-SRNP-15090       | MHAHC772-05           | DQ292458                 |
| 6778              | Epargyreus Burns02   | Pyrginae         | 04-SRNP-15384       | MHAHC779-05           | DQ292459                 |
| 6779              | Epargyreus Burns02   | Pyrginae         | 04-SRNP-4655        | MHAHC781-05           | DQ292461                 |
| 6780              | Epargyreus Burns02   | Pyrginae         | 04-SRNP-15720       | MHAHC785-05           | DQ292463                 |
| 6781              | Epargyreus Burns02   | Pyrginae         | 06-SRNP-43439       | MHAHI506-06           | GU155961                 |
| 6782              | Epargyreus Burns02   | Pyrginae         | 06-SRNP-43442       | MHAHI507-06           | GU155962                 |
| 6783              | Epargyreus Burns02   | Pyrginae         | 06-SRNP-43440       | MHAHJ680-07           | JF752769                 |
| 6784              | Epargyreus Burns02   | Pyrginae         | 05-SRNP-32694       | MHAHL063-07           | JF762194                 |
| 6785              | Epargyreus Burns02   | Pyrginae         | 05-SRNP-1416        | MHAHL067-07           | JF762195                 |
| 6786              | Epargyreus Burns02   | Pyrginae         | 04-SRNP-27299       | MHAHL068-07           | JF762196                 |
| 6787              | Epargyreus Burns02   | Pyrginae         | 05-SRNP-92          | MHAHL076-07           | JF762198                 |
| 6788              | Epargyreus Burns02   | Pyrginae         | 08-SRNP-4814        | MHMXX654-09           | JF777911                 |
| 6789              | Epargyreus Burns02   | Pyrginae         | 08-SRNP-4777        | MHMXX657-09           | JF777914                 |
| 6790              | Epargyreus Burns02   | Pyrginae         | 09-SRNP-72516       | MHMYE1444-09          | GU653551                 |
| 6791              | Epargyreus Burns02   | Pyrginae         | 09-SRNP-73319       | MHMYG2465-10          | HM885892                 |
| 6792              | Epargyreus Burns02   | Pyrginae         | 09-SRNP-76379       | MHMYG2466-10          | HM885893                 |
| 6793              | Epargyreus Burns02   | Pyrginae         | 09-SRNP-75608       | MHMYG2468-10          | HM885894                 |
| 6794              | Codattractus imalena | Pyrginae         | 00-SRNP-10752       | XAA724-04             | N/A                      |
| 6795              | Codattractus imalena | Pyrginae         | 97-SRNP-1645        | XAA735-04             |                          |
| 6796              | Codattractus imalena | Pyrginae         | 02-SRNP-24526       | CSCR074-04            | DQ292186                 |
| 6797              | Codattractus imalena | Pyrginae         | 01-SRNP-7390        | XAA719-04             | DQ292191                 |
| 6798              | Codattractus imalena | Pyrginae         | 00-SRNP-10734       | XAA720-04             | DQ292192                 |
| 6799              | Codattractus imalena | Pyrginae         | 04-SRNP-35578       | MHAHD711-05           | GU161359                 |
| 6800              | Codattractus imalena | Pyrginae         | 01-SRNP-7384        | XAA718-04             | DQ292190                 |
| 6801              | Codattractus imalena | Pyrginae         | 98-SRNP-3451        | XAA734-04             | DQ292202                 |
| 6802              | Codattractus imalena | Pyrginae         | 99-SRNP-5496        | XAA716-04             | DQ292188                 |
| 6803              | Codattractus melon   | Pyrginae         | 92-SRNP-3686        | CSRII443-04           | GU161362                 |
| 6804              | Codattractus imalena | Pyrginae         | 00-SRNP-9613        | XAA733-04             | DQ292201                 |
| 6805              | Codattractus imalena | Pyrginae         | 00-SRNP-10005       | XAA722-04             | DQ292194                 |
| 6806              | Codattractus imalena | Pyrginae         | 03-SRNP-4322        | XAA715-04             | DQ292187                 |
| 6807              | Codattractus imalena | Pyrginae         | 00-SRNP-10020       | XAA732-04             | DQ292200                 |
| 6808              | Codattractus imalena | Pyrginae         | 01-SRNP-21206       | XAA728-04             | DQ292198                 |
| 6809              | Codattractus imalena | Pyrginae         | 00-SRNP-9747        | XAA731-04             | DQ292199                 |
| 6810              | Codattractus imalena | Pyrginae         | 01-SRNP-21186       | XAA717-04             | DQ292189                 |
| 6811              | Codattractus imalena | Pyrginae         | 01-SRNP-7119        | XAA727-04             | DQ292197                 |
| 6812              | Codattractus imalena | Pyrginae         | 01-SRNP-7392        | XAA721-04             | DQ292193                 |
| 6813              | Codattractus imalena | Pyrginae         | 04-SRNP-46325       | MHAHC067-05           | DQ292205                 |
| 6814              | Codattractus imalena | Pyrginae         | 04-SRNP-46730       | MHAHC075-05           | DQ292206                 |
| 6815              | Codattractus imalena | Pyrginae         | 04-SRNP-35580       | MHAHD710-05           | GU161360                 |
| 6816              | Codattractus imalena | Pyrginae         | 04-SRNP-35579       | MHAHD712-05           | GU161361                 |
| 6817              | Codattractus imalena | Pyrginae         | 04-SRNP-46729       | MHAHC043-05           | DQ292203                 |
| 6818              | Codattractus imalena | Pyrginae         | 04-SRNP-47215       | MHAHC059-05           | DQ292204                 |
| 6819              | Codattractus imalena | Pyrginae         | 08-SRNP-35884       | MHMXX976-09           | JF777791                 |
| 6820              | Codattractus imalena | Pyrginae         | 01-SRNP-21138       | CSRII442-04           | GU161358                 |
| 6821              | Codattractus melon   | Pyrginae         | 93-SRNP-5542        | CSRII756-05           | DQ292209                 |
| 6822              | Codattractus melon   | Pyrginae         | 93-SRNP-5545        | CSRII755-05           | DQ292208                 |
| 6823              | Codattractus melon   | Pyrginae         | 92-SRNP-3678        | CSRII758-05           | DQ292210                 |
| 6824              | Codattractus melon   | Pyrginae         | 90-SRNP-1878        | CSRII759-05           | DQ292211                 |
| 6825              | Codattractus melon   | Pyrginae         | 92-SRNP-3626        | CSRII760-05           | DQ292212                 |
| 6826              | Codattractus melon   | Pyrginae         | 93-SRNP-3061        | CSRII444-04           | DQ292207                 |
| 6827              | Codattractus melon   | Pyrginae         | 93-SRNP-5544        | CSRII761-05           | DQ292213                 |
| 6828              | Codattractus alcaeus | Pyrginae         | 01-SRNP-16125       | CSRII440-04           | GU161355                 |
| 6829              | Codattractus alcaeus | Pyrginae         | 99-SRNP-2489        | CSRII439-04           | GU161356                 |
| 6830              | Codattractus carlos  | Pyrginae         | 06-SRNP-2517        | MHAHG673-06           | GU151317                 |
| 6831              | Codattractus imalena | Pyrginae         | 00-SRNP-10506       | CSRII441-04           | GU161357                 |

| <b>Tree Order</b> | <b>Species</b>         | <b>Subfamily</b> | <b>ACG Sampleid</b> | <b>BOLD Processid</b> | <b>Genbank Accession</b> |
|-------------------|------------------------|------------------|---------------------|-----------------------|--------------------------|
| 6832              | Codattractus alcaeus   | Pyrginae         | 04-SRNP-45206       | MHAHC051-05           | DQ292185                 |
| 6833              | Codattractus imalena   | Pyrginae         | 09-SRNP-12121       | MHMYG2038-10          | HM885440                 |
| 6834              | Codattractus imalena   | Pyrginae         | 09-SRNP-12120       | MHMYG2039-10          | HM885441                 |
| 6835              | Ridens mephitidisDHJ02 | Pyrginae         | 04-SRNP-35805       | MHAHF245-06           | GU150758                 |
| 6836              | Ridens mephitidisDHJ02 | Pyrginae         | 04-SRNP-36233       | MHAHD390-05           | GU161831                 |
| 6837              | Ridens mephitidisDHJ02 | Pyrginae         | 02-SRNP-8370        | XAA933-04             | DQ293224                 |
| 6838              | Ridens mephitidisDHJ02 | Pyrginae         | 03-SRNP-4203        | CSRII471-04           | DQ293220                 |
| 6839              | Ridens mephitidisDHJ02 | Pyrginae         | 00-SRNP-9345        | XAA901-04             | DQ293222                 |
| 6840              | Ridens mephitidisDHJ02 | Pyrginae         | 03-SRNP-3199        | CSCR410-04            | DQ293219                 |
| 6841              | Ridens mephitidisDHJ02 | Pyrginae         | 02-SRNP-23638       | XAA925-04             | DQ293223                 |
| 6842              | Ridens mephitidisDHJ02 | Pyrginae         | 99-SRNP-1768        | XAA892-04             | DQ293221                 |
| 6843              | Ridens mephitidisDHJ02 | Pyrginae         | 05-SRNP-36028       | MHAHG124-06           | GU151607                 |
| 6844              | Ridens mephitidisDHJ02 | Pyrginae         | 05-SRNP-36029       | MHAHG125-06           | GU151608                 |
| 6845              | Ridens mephitidisDHJ04 | Pyrginae         | 06-SRNP-60255       | MHMXX105-07           | JF762800                 |
| 6846              | Ridens mephitidisDHJ04 | Pyrginae         | 06-SRNP-60252       | MHAHK207-07           | JF761118                 |
| 6847              | Ridens mephitidisDHJ04 | Pyrginae         | 93-SRNP-3068        | XAA909-04             | DQ293234                 |
| 6848              | Ridens mephitidisDHJ04 | Pyrginae         | 92-SRNP-5754        | XAA917-04             | DQ293235                 |
| 6849              | Ridens mephitidisDHJ04 | Pyrginae         | 06-SRNP-59545       | MHAHK205-07           | JF761117                 |
| 6850              | Ridens mephitidisDHJ04 | Pyrginae         | 08-SRNP-57638       | MHMXX703-09           | JF778436                 |
| 6851              | Ridens mephitidisDHJ04 | Pyrginae         | 08-SRNP-57623       | MHMXX704-09           | JF778437                 |
| 6852              | Ridens mephitidisDHJ04 | Pyrginae         | 08-SRNP-57620       | MHMXX705-09           | JF778438                 |
| 6853              | Ridens mephitidisDHJ04 | Pyrginae         | 08-SRNP-57621       | MHMXX706-09           | JF778439                 |
| 6854              | Ridens mephitidisDHJ03 | Pyrginae         | 07-SRNP-56610       | MHMXP130-08           | JF762796                 |
| 6855              | Ridens mephitidisDHJ03 | Pyrginae         | 99-SRNP-10376       | XAA876-04             | DQ293229                 |
| 6856              | Ridens mephitidisDHJ03 | Pyrginae         | 08-SRNP-57249       | MHMXX700-09           | JF778432                 |
| 6857              | Ridens mephitidisDHJ03 | Pyrginae         | 06-SRNP-57708       | MHAHK203-07           | JF761111                 |
| 6858              | Ridens mephitidisDHJ03 | Pyrginae         | 06-SRNP-60058       | MHAHK202-07           | JF761110                 |
| 6859              | Ridens mephitidisDHJ03 | Pyrginae         | 06-SRNP-59544       | MHAHK199-07           | JF761108                 |
| 6860              | Ridens mephitidisDHJ03 | Pyrginae         | 06-SRNP-46964       | MHAHJ653-07           | JF753135                 |
| 6861              | Ridens mephitidisDHJ03 | Pyrginae         | 99-SRNP-11670       | XAA900-04             | DQ293233                 |
| 6862              | Ridens mephitidisDHJ03 | Pyrginae         | 02-SRNP-32153       | XAA884-04             | DQ293230                 |
| 6863              | Ridens mephitidisDHJ03 | Pyrginae         | 02-SRNP-32151       | XAA868-04             | DQ293228                 |
| 6864              | Ridens mephitidisDHJ03 | Pyrginae         | 98-SRNP-2715        | XAA935-04             | DQ293236                 |
| 6865              | Ridens mephitidisDHJ03 | Pyrginae         | 99-SRNP-11297       | XAA893-04             | DQ293232                 |
| 6866              | Ridens mephitidisDHJ03 | Pyrginae         | 99-SRNP-10355       | XAA885-04             | DQ293231                 |
| 6867              | Ridens mephitidisDHJ03 | Pyrginae         | 06-SRNP-59546       | MHAHK200-07           | JF761109                 |
| 6868              | Ridens mephitidisDHJ03 | Pyrginae         | 08-SRNP-56874       | MHMXX707-09           | JF778435                 |
| 6869              | Ridens mephitidisDHJ03 | Pyrginae         | 05-SRNP-65555       | MHAHF662-06           | GU150759                 |
| 6870              | Ridens mephitidisDHJ03 | Pyrginae         | 06-SRNP-36844       | MHAHK208-07           | JF761114                 |
| 6871              | Ridens mephitidisDHJ03 | Pyrginae         | 07-SRNP-57507       | MHMXP129-08           | JF762797                 |
| 6872              | Ridens mephitidisDHJ03 | Pyrginae         | 07-SRNP-57088       | MHMXP127-08           | JF762799                 |
| 6873              | Ridens mephitidisDHJ03 | Pyrginae         | 07-SRNP-57579       | MHMXP128-08           | JF762798                 |
| 6874              | Ridens mephitidisDHJ03 | Pyrginae         | 08-SRNP-57406       | MHMXX699-09           | JF778431                 |
| 6875              | Ridens mephitidisDHJ03 | Pyrginae         | 06-SRNP-56397       | MHAHI131-06           | GU156301                 |
| 6876              | Ridens mephitidisDHJ03 | Pyrginae         | 97-SRNP-1073.01     | XAA860-04             | DQ293227                 |
| 6877              | Ridens mephitidisDHJ03 | Pyrginae         | 99-SRNP-11678       | XAA852-04             | DQ293226                 |
| 6878              | Ridens mephitidisDHJ03 | Pyrginae         | 99-SRNP-11679       | CSRII470-04           | DQ293225                 |
| 6879              | Ridens mephitidisDHJ03 | Pyrginae         | 06-SRNP-58702       | MHAHK204-07           | JF761112                 |
| 6880              | Ridens mephitidisDHJ03 | Pyrginae         | 06-SRNP-60253       | MHAHK206-07           | JF761113                 |
| 6881              | Ridens mephitidisDHJ03 | Pyrginae         | 06-SRNP-59547       | MHAHK209-07           | JF761115                 |
| 6882              | Ridens mephitidisDHJ03 | Pyrginae         | 06-SRNP-60254       | MHAHK210-07           | JF761116                 |
| 6883              | Ridens mephitidisDHJ03 | Pyrginae         | 08-SRNP-57289       | MHMXX701-09           | JF778433                 |
| 6884              | Ridens mephitidisDHJ03 | Pyrginae         | 08-SRNP-57560       | MHMXX702-09           | JF778434                 |
| 6885              | Ridens mephitidisDHJ03 | Pyrginae         | 08-SRNP-57622       | MHMXXZ009-09          | GU665263                 |
| 6886              | Ridens pancheDHJ01     | Pyrginae         | 06-SRNP-31875       | MHAHI114-06           | GU156303                 |
| 6887              | Ridens pancheDHJ01     | Pyrginae         | 06-SRNP-31873       | MHAHH491-06           | GU155490                 |

| Tree Order | Species            | Subfamily | ACG Sampleid  | BOLD Processid | Genbank Accession |
|------------|--------------------|-----------|---------------|----------------|-------------------|
| 6888       | Ridens pancheDHJ01 | Pyrginae  | 06-SRNP-32333 | MHAHI565-06    | GU156303          |
| 6889       | Ridens pancheDHJ01 | Pyrginae  | 00-SRNP-9482  | MHAHK555-07    | JF761119          |
| 6890       | Ridens pancheDHJ02 | Pyrginae  | 07-SRNP-35883 | MHMXP133-08    | JF762803          |
| 6891       | Ridens pancheDHJ02 | Pyrginae  | 01-SRNP-7463  | MHAHK552-07    | JF761146          |
| 6892       | Ridens pancheDHJ02 | Pyrginae  | 07-SRNP-35884 | MHMXP134-08    | JF762802          |
| 6893       | Ridens pancheDHJ02 | Pyrginae  | 02-SRNP-9387  | CSCR231-04     | DQ293239          |
| 6894       | Ridens pancheDHJ02 | Pyrginae  | 01-SRNP-6746  | MHAHK509-07    | JF761127          |
| 6895       | Ridens pancheDHJ02 | Pyrginae  | 02-SRNP-9385  | MHAHK557-07    | JF761150          |
| 6896       | Ridens pancheDHJ02 | Pyrginae  | 03-SRNP-4091  | MHAHK516-07    | JF761134          |
| 6897       | Ridens pancheDHJ02 | Pyrginae  | 02-SRNP-8372  | MHAHK505-07    | JF761123          |
| 6898       | Ridens pancheDHJ02 | Pyrginae  | 01-SRNP-6929  | MHAHK507-07    | JF761125          |
| 6899       | Ridens pancheDHJ02 | Pyrginae  | 02-SRNP-8538  | MHAHK506-07    | JF761124          |
| 6900       | Ridens pancheDHJ02 | Pyrginae  | 06-SRNP-3632  | MHAHK195-07    | JF761120          |
| 6901       | Ridens pancheDHJ02 | Pyrginae  | 06-SRNP-35129 | MHAHI112-06    | GU156304          |
| 6902       | Ridens pancheDHJ02 | Pyrginae  | 05-SRNP-35185 | MHAHF233-06    | GU150762          |
| 6903       | Ridens pancheDHJ02 | Pyrginae  | 05-SRNP-35180 | MHAHF228-06    | GU150760          |
| 6904       | Ridens pancheDHJ02 | Pyrginae  | 04-SRNP-35425 | MHAHF225-06    | GU150763          |
| 6905       | Ridens pancheDHJ02 | Pyrginae  | 05-SRNP-31719 | MHAHF223-06    | GU150761          |
| 6906       | Ridens pancheDHJ02 | Pyrginae  | 04-SRNP-35446 | MHAHD726-05    | GU161832          |
| 6907       | Ridens pancheDHJ02 | Pyrginae  | 04-SRNP-35428 | MHAHD725-05    | GU161833          |
| 6908       | Ridens pancheDHJ02 | Pyrginae  | 03-SRNP-6073  | CSCR412-04     | DQ293240          |
| 6909       | Ridens pancheDHJ02 | Pyrginae  | 06-SRNP-3638  | MHAHK197-07    | JF761121          |
| 6910       | Ridens pancheDHJ02 | Pyrginae  | 06-SRNP-3482  | MHAHK198-07    | JF761122          |
| 6911       | Ridens pancheDHJ02 | Pyrginae  | 03-SRNP-3775  | MHAHK514-07    | JF761132          |
| 6912       | Ridens pancheDHJ02 | Pyrginae  | 01-SRNP-6839  | MHAHK510-07    | JF761128          |
| 6913       | Ridens pancheDHJ02 | Pyrginae  | 02-SRNP-9450  | MHAHK508-07    | JF761126          |
| 6914       | Ridens pancheDHJ02 | Pyrginae  | 02-SRNP-8537  | MHAHK512-07    | JF761130          |
| 6915       | Ridens pancheDHJ02 | Pyrginae  | 03-SRNP-3740  | MHAHK517-07    | JF761135          |
| 6916       | Ridens pancheDHJ02 | Pyrginae  | 03-SRNP-4014  | MHAHK519-07    | JF761137          |
| 6917       | Ridens pancheDHJ02 | Pyrginae  | 01-SRNP-9377  | MHAHK551-07    | JF761145          |
| 6918       | Ridens pancheDHJ02 | Pyrginae  | 01-SRNP-6552  | MHAHK553-07    | JF761147          |
| 6919       | Ridens pancheDHJ02 | Pyrginae  | 00-SRNP-10808 | MHAHK511-07    | JF761129          |
| 6920       | Ridens pancheDHJ02 | Pyrginae  | 00-SRNP-10799 | MHAHK513-07    | JF761131          |
| 6921       | Ridens pancheDHJ02 | Pyrginae  | 03-SRNP-3772  | MHAHK515-07    | JF761133          |
| 6922       | Ridens pancheDHJ02 | Pyrginae  | 03-SRNP-3769  | MHAHK518-07    | JF761136          |
| 6923       | Ridens pancheDHJ02 | Pyrginae  | 98-SRNP-2005  | MHAHK546-07    | JF761140          |
| 6924       | Ridens pancheDHJ02 | Pyrginae  | 03-SRNP-4067  | MHAHK547-07    | JF761141          |
| 6925       | Ridens pancheDHJ02 | Pyrginae  | 03-SRNP-3596  | MHAHK548-07    | JF761142          |
| 6926       | Ridens pancheDHJ02 | Pyrginae  | 03-SRNP-4312  | MHAHK549-07    | JF761143          |
| 6927       | Ridens pancheDHJ02 | Pyrginae  | 03-SRNP-3808  | MHAHK550-07    | JF761144          |
| 6928       | Ridens pancheDHJ02 | Pyrginae  | 02-SRNP-8369  | MHAHK554-07    | JF761148          |
| 6929       | Ridens pancheDHJ02 | Pyrginae  | 02-SRNP-8368  | MHAHK556-07    | JF761149          |
| 6930       | Ridens pancheDHJ02 | Pyrginae  | 03-SRNP-3774  | MHAHK558-07    | JF761151          |
| 6931       | Ridens pancheDHJ02 | Pyrginae  | 03-SRNP-3634  | MHAHK559-07    | JF761152          |
| 6932       | Ridens pancheDHJ02 | Pyrginae  | 99-SRNP-453   | MHAHK560-07    | JF761153          |
| 6933       | Ridens pancheDHJ02 | Pyrginae  | 06-SRNP-3634  | MHMXX106-07    | JF762804          |
| 6934       | Ridens pancheDHJ02 | Pyrginae  | 07-SRNP-35521 | MHMXR845-08    | JF762801          |
| 6935       | Ridens pancheDHJ02 | Pyrginae  | 08-SRNP-35179 | MHMXX949-09    | JF778442          |
| 6936       | Ridens pancheDHJ02 | Pyrginae  | 08-SRNP-35569 | MHMXX953-09    | JF778443          |
| 6937       | Ridens pancheDHJ02 | Pyrginae  | 03-SRNP-23955 | MHAHK544-07    | JF761138          |
| 6938       | Ridens pancheDHJ02 | Pyrginae  | 03-SRNP-3637  | MHAHK545-07    | JF761139          |
| 6939       | Ridens pancheDHJ02 | Pyrginae  | 08-SRNP-35487 | MHMXX695-09    | JF778440          |
| 6940       | Ridens pancheDHJ02 | Pyrginae  | 08-SRNP-35331 | MHMXX696-09    | JF778441          |
| 6941       | Ridens Burns01     | Pyrginae  | 06-SRNP-31900 | MHAHJ818-07    | JF753134          |
| 6942       | Ridens Burns01     | Pyrginae  | 05-SRNP-30993 | MHAHF236-06    | GU150755          |
| 6943       | Ridens Burns01     | Pyrginae  | 05-SRNP-30994 | MHAHF242-06    | GU150754          |

| <b>Tree Order</b> | <b>Species</b>    | <b>Subfamily</b> | <b>ACG Sampleid</b> | <b>BOLD Processid</b> | <b>Genbank Accession</b> |
|-------------------|-------------------|------------------|---------------------|-----------------------|--------------------------|
| 6944              | Ridens Burns01    | Pyrginae         | 05-SRNP-30995       | MHAHF241-06           | GU150757                 |
| 6945              | Ridens Burns01    | Pyrginae         | 02-SRNP-28461       | CSCR226-04            | DQ293217                 |
| 6946              | Ridens Burns01    | Pyrginae         | 05-SRNP-31102       | MHAHF240-06           | GU150756                 |
| 6947              | Ridens Burns01    | Pyrginae         | 02-SRNP-28462       | CSCR227-04            | DQ293218                 |
| 6948              | Ridens Burns01    | Pyrginae         | 05-SRNP-31099       | MHAHF234-06           | GU150753                 |
| 6949              | Ridens Burns01    | Pyrginae         | 06-SRNP-31896       | MHAHI493-06           | GU156300                 |
| 6950              | Ridens Burns01    | Pyrginae         | 06-SRNP-7320        | MHAHJ736-07           | JF753133                 |
| 6951              | Ridens Burns01    | Pyrginae         | 06-SRNP-31898       | MHAHI492-06           | GU156299                 |
| 6952              | Ridens Burns01    | Pyrginae         | 06-SRNP-31899       | MHAHJ651-07           | JF753132                 |
| 6953              | Ridens Burns01    | Pyrginae         | 06-SRNP-31901       | MHMXX103-07           | JF762795                 |
| 6954              | Ridens biolleyi   | Pyrginae         | 09-SRNP-35558       | MHMYE1434-09          | GU653562                 |
| 6955              | Ridens biolleyi   | Pyrginae         | 02-SRNP-8021        | CSCR225-04            | DQ293206                 |
| 6956              | Ridens biolleyi   | Pyrginae         | 01-SRNP-6396        | CSRII718-05           | DQ293209                 |
| 6957              | Ridens biolleyi   | Pyrginae         | 98-SRNP-2547        | CSRII723-05           | DQ293214                 |
| 6958              | Ridens biolleyi   | Pyrginae         | 00-SRNP-9333        | CSRII721-05           | DQ293212                 |
| 6959              | Ridens biolleyi   | Pyrginae         | 00-SRNP-9370        | CSRII720-05           | DQ293211                 |
| 6960              | Ridens biolleyi   | Pyrginae         | 00-SRNP-9238        | CSRII724-05           | DQ293215                 |
| 6961              | Ridens biolleyi   | Pyrginae         | 00-SRNP-9259        | CSRII719-05           | DQ293210                 |
| 6962              | Ridens biolleyi   | Pyrginae         | 02-SRNP-8016        | CSRII469-04           | DQ293208                 |
| 6963              | Ridens biolleyi   | Pyrginae         | 00-SRNP-9229        | CSRII468-04           | DQ293207                 |
| 6964              | Ridens biolleyi   | Pyrginae         | 01-SRNP-6395        | CSRII722-05           | DQ293213                 |
| 6965              | Ridens biolleyi   | Pyrginae         | 99-SRNP-17191       | CSRII725-05           | DQ293216                 |
| 6966              | Ridens biolleyi   | Pyrginae         | 08-SRNP-31106       | MHMXX659-09           | JF778430                 |
| 6967              | Ridens biolleyi   | Pyrginae         | 09-SRNP-36067       | MHMYE1435-09          | GU653559                 |
| 6968              | Ridens biolleyi   | Pyrginae         | 09-SRNP-36267       | MHMYE1436-09          | GU653560                 |
| 6969              | Ridens cachinnans | Pyrginae         | 08-SRNP-37306       | MHMYC382-09           | HM893835                 |
| 6970              | Ridens cachinnans | Pyrginae         | 02-SRNP-23213       | CSCR229-04            | DQ293238                 |
| 6971              | Ridens cachinnans | Pyrginae         | 02-SRNP-23212       | CSCR228-04            | DQ293237                 |
| 6972              | Ridens cachinnans | Pyrginae         | 08-SRNP-35997       | MHMYC383-09           | GU649918                 |
| 6973              | Ridens cachinnans | Pyrginae         | 08-SRNP-35556       | MHMYC384-09           | GU649921                 |
| 6974              | Ridens cachinnans | Pyrginae         | 09-SRNP-36708       | MHMYG2020-10          | HM885421                 |
| 6975              | Venada nevada     | Pyrginae         | 05-SRNP-35056       | MHAHL056-07           | JF763475                 |
| 6976              | Venada nevada     | Pyrginae         | 07-SRNP-35995       | MHMXR829-08           | JF763476                 |
| 6977              | Venada nevada     | Pyrginae         | 06-SRNP-36696       | MHMXH846-07           | JF761315                 |
| 6978              | Venada nevada     | Pyrginae         | 03-SRNP-3106        | CSRII229-04           | DQ293874                 |
| 6979              | Venada nevada     | Pyrginae         | 03-SRNP-4419        | CSRII233-04           | DQ293878                 |
| 6980              | Venada nevada     | Pyrginae         | 03-SRNP-4070        | CSRII232-04           | DQ293877                 |
| 6981              | Venada nevada     | Pyrginae         | 03-SRNP-3148        | CSCR440-04            | DQ293872                 |
| 6982              | Venada nevada     | Pyrginae         | 03-SRNP-3972        | CSRII231-04           | DQ293876                 |
| 6983              | Venada nevada     | Pyrginae         | 00-SRNP-9986        | CSCR281-04            | DQ293870                 |
| 6984              | Venada nevada     | Pyrginae         | 05-SRNP-227         | MHAHL046-07           | JF763470                 |
| 6985              | Venada nevada     | Pyrginae         | 05-SRNP-30877       | MHAHL045-07           | JF763469                 |
| 6986              | Venada nevada     | Pyrginae         | 05-SRNP-226         | MHAHL044-07           | JF763468                 |
| 6987              | Venada nevada     | Pyrginae         | 05-SRNP-577         | MHAHL042-07           | JF763466                 |
| 6988              | Venada nevada     | Pyrginae         | 05-SRNP-35565       | MHAHL041-07           | JF763465                 |
| 6989              | Venada nevada     | Pyrginae         | 05-SRNP-35356       | MHAHL040-07           | JF763464                 |
| 6990              | Venada nevada     | Pyrginae         | 04-SRNP-35614       | MHAHE016-05           | GU150148                 |
| 6991              | Venada nevada     | Pyrginae         | 04-SRNP-35681       | MHAHE015-05           | GU150147                 |
| 6992              | Venada nevada     | Pyrginae         | 04-SRNP-56616       | MHAHE014-05           | GU150149                 |
| 6993              | Venada nevada     | Pyrginae         | 04-SRNP-56617       | MHAHE013-05           | GU150146                 |
| 6994              | Venada nevada     | Pyrginae         | 04-SRNP-61462       | MHAHL043-07           | JF763467                 |
| 6995              | Venada nevada     | Pyrginae         | 06-SRNP-36333       | MHMXH843-07           | JF761317                 |
| 6996              | Venada nevada     | Pyrginae         | 06-SRNP-36619       | MHMXH844-07           | JF761316                 |
| 6997              | Venada nevada     | Pyrginae         | 98-SRNP-2758        | CSCR280-04            | DQ293869                 |
| 6998              | Venada nevada     | Pyrginae         | 03-SRNP-3990        | CSCR439-04            | DQ293871                 |
| 6999              | Venada nevada     | Pyrginae         | 03-SRNP-4768        | CSCR441-04            | DQ293873                 |

| <b>Tree Order</b> | <b>Species</b> | <b>Subfamily</b> | <b>ACG Sampleid</b> | <b>BOLD Processid</b> | <b>Genbank Accession</b> |
|-------------------|----------------|------------------|---------------------|-----------------------|--------------------------|
| 7000              | Venada nevada  | Pyrginae         | 03-SRNP-3346        | CSRII230-04           | DQ293875                 |
| 7001              | Venada nevada  | Pyrginae         | 05-SRNP-35244       | MHAHL054-07           | JF763473                 |
| 7002              | Venada nevada  | Pyrginae         | 05-SRNP-30878       | MHAHL050-07           | JF763471                 |
| 7003              | Venada nevada  | Pyrginae         | 05-SRNP-30663       | MHAHL053-07           | JF763472                 |
| 7004              | Venada nevada  | Pyrginae         | 05-SRNP-30665       | MHAHL055-07           | JF763474                 |
| 7005              | Venada nevada  | Pyrginae         | 07-SRNP-36157       | MHMXO877-08           | JF763481                 |
| 7006              | Venada nevada  | Pyrginae         | 07-SRNP-36499       | MHMXO878-08           | JF763480                 |
| 7007              | Venada nevada  | Pyrginae         | 07-SRNP-35918       | MHMXO880-08           | JF763479                 |
| 7008              | Venada nevada  | Pyrginae         | 07-SRNP-35840       | MHMXO881-08           | JF763478                 |
| 7009              | Venada nevada  | Pyrginae         | 07-SRNP-35841       | MHMXO882-08           | JF763477                 |
| 7010              | Venada nevada  | Pyrginae         | 08-SRNP-35509       | MHMXX614-09           | JF778605                 |
| 7011              | Venada nevada  | Pyrginae         | 08-SRNP-35511       | MHMXX615-09           | JF778606                 |
| 7012              | Venada nevada  | Pyrginae         | 08-SRNP-35510       | MHMXX616-09           | JF778607                 |
| 7013              | Venada nevada  | Pyrginae         | 08-SRNP-35612       | MHMXX617-09           | JF778608                 |
| 7014              | Venada daneva  | Pyrginae         | 06-SRNP-4962        | MHAHI124-06           | GU156725                 |
| 7015              | Venada daneva  | Pyrginae         | 03-SRNP-5810        | CSRII237-04           | DQ293865                 |
| 7016              | Venada daneva  | Pyrginae         | 02-SRNP-20143       | CSRII235-04           | DQ293863                 |
| 7017              | Venada daneva  | Pyrginae         | 03-SRNP-6535        | CSCR448-04            | DQ293858                 |
| 7018              | Venada daneva  | Pyrginae         | 99-SRNP-18830       | CSCR453-04            | DQ293861                 |
| 7019              | Venada daneva  | Pyrginae         | 03-SRNP-5862        | CSCR449-04            | DQ293859                 |
| 7020              | Venada daneva  | Pyrginae         | 97-SRNP-11560       | CSCR452-04            | DQ293860                 |
| 7021              | Venada daneva  | Pyrginae         | 03-SRNP-5863        | CSRII238-04           | DQ293866                 |
| 7022              | Venada daneva  | Pyrginae         | 03-SRNP-5651        | CSRII236-04           | DQ293864                 |
| 7023              | Venada daneva  | Pyrginae         | 04-SRNP-32605       | MHAHE008-05           | GU150142                 |
| 7024              | Venada daneva  | Pyrginae         | 04-SRNP-2360        | MHAHE009-05           | GU150143                 |
| 7025              | Venada daneva  | Pyrginae         | 04-SRNP-2359        | MHAHE010-05           | GU150141                 |
| 7026              | Venada daneva  | Pyrginae         | 04-SRNP-2191        | MHAHE011-05           | GU150144                 |
| 7027              | Venada daneva  | Pyrginae         | 04-SRNP-2688        | MHAHE012-05           | GU150145                 |
| 7028              | Venada daneva  | Pyrginae         | 05-SRNP-2577        | MHAHL052-07           | JF763457                 |
| 7029              | Venada daneva  | Pyrginae         | 07-SRNP-2501        | MHMXN303-07           | JF763460                 |
| 7030              | Venada daneva  | Pyrginae         | 07-SRNP-2502        | MHMXN306-07           | JF763459                 |
| 7031              | Venada daneva  | Pyrginae         | 07-SRNP-2371        | MHMXO879-08           | JF763458                 |
| 7032              | Venada daneva  | Pyrginae         | 08-SRNP-2594        | MHMXW568-09           | JF754386                 |
| 7033              | Venada daneva  | Pyrginae         | 08-SRNP-2680        | MHMXW569-09           | JF754387                 |
| 7034              | Venada daneva  | Pyrginae         | 08-SRNP-2705        | MHMXW570-09           | JF754388                 |
| 7035              | Venada daneva  | Pyrginae         | 08-SRNP-31224       | MHMXX856-09           | JF778604                 |
| 7036              | Venada daneva  | Pyrginae         | 09-SRNP-32294       | MHMYE1420-09          | HM424369                 |
| 7037              | Venada naranja | Pyrginae         | 00-SRNP-9226        | MHMXI685-07           | JF761312                 |
| 7038              | Venada naranja | Pyrginae         | 01-SRNP-6992        | MHMXI682-07           | JF761304                 |
| 7039              | Venada naranja | Pyrginae         | 02-SRNP-8086        | MHMXI681-07           | JF761305                 |
| 7040              | Venada naranja | Pyrginae         | 03-SRNP-22199       | MHMXI680-07           | JF761306                 |
| 7041              | Venada naranja | Pyrginae         | 00-SRNP-9327        | MHMXI678-07           | JF761307                 |
| 7042              | Venada naranja | Pyrginae         | 00-SRNP-9252        | MHMXI677-07           | JF761308                 |
| 7043              | Venada naranja | Pyrginae         | 00-SRNP-9183        | MHMXI676-07           | JF761309                 |
| 7044              | Venada naranja | Pyrginae         | 00-SRNP-9324        | MHMXI675-07           | JF761311                 |
| 7045              | Venada naranja | Pyrginae         | 99-SRNP-1069        | MHMXI674-07           | JF761313                 |
| 7046              | Venada naranja | Pyrginae         | 00-SRNP-9050        | MHMXI673-07           | JF761302                 |
| 7047              | Venada naranja | Pyrginae         | 06-SRNP-35940       | MHMXH845-07           | JF761303                 |
| 7048              | Venada naranja | Pyrginae         | 03-SRNP-4740        | CSCR444-04            | DQ293868                 |
| 7049              | Venada naranja | Pyrginae         | 02-SRNP-24573       | CSCR442-04            | DQ293867                 |
| 7050              | Venada naranja | Pyrginae         | 03-SRNP-3901        | MHMXI679-07           | JF761301                 |
| 7051              | Venada naranja | Pyrginae         | 04-SRNP-35682       | MHAHL039-07           | JF763461                 |
| 7052              | Venada naranja | Pyrginae         | 00-SRNP-9329        | MHMXI686-07           | JF761310                 |
| 7053              | Venada naranja | Pyrginae         | 04-SRNP-36174       | MHAHL051-07           | JF763462                 |
| 7054              | Venada naranja | Pyrginae         | 05-SRNP-35059       | MHAHL057-07           | JF763463                 |
| 7055              | Venada naranja | Pyrginae         | 09-SRNP-35765       | MHMYE1417-09          | HM424366                 |

| <b>Tree Order</b> | <b>Species</b>           | <b>Subfamily</b> | <b>ACG Sampleid</b> | <b>BOLD Processid</b> | <b>Genbank Accession</b> |
|-------------------|--------------------------|------------------|---------------------|-----------------------|--------------------------|
| 7056              | Venada Janzen01          | Pyrginae         | 09-SRNP-36371       | MHMYE1418-09          | HM424367                 |
| 7057              | Venada Janzen01          | Pyrginae         | 09-SRNP-36370       | MHMYE1419-09          | HM424368                 |
| 7058              | Venada cacao             | Pyrginae         | 02-SRNP-23324       | MHMXI672-07           | JF761298                 |
| 7059              | Venada cacao             | Pyrginae         | 02-SRNP-23004       | CSCR283-04            | DQ293856                 |
| 7060              | Venada cacao             | Pyrginae         | 02-SRNP-23362       | MHMXI671-07           | JF761299                 |
| 7061              | Venada cacao             | Pyrginae         | 02-SRNP-23364       | CSCR284-04            | DQ293857                 |
| 7062              | Venada cacao             | Pyrginae         | 01-SRNP-6880        | MHMXI670-07           | JF761300                 |
| 7063              | Venada cacaoDHJ02        | Pyrginae         | 09-SRNP-36883       | MHMYH1524-10          | JF751917                 |
| 7064              | Polythrix kanshul        | Pyrginae         | 04-SRNP-60560       | MHAHC721-05           | DQ293078                 |
| 7065              | Polythrix kanshul        | Pyrginae         | 05-SRNP-5452        | MHAHF746-06           | GU150724                 |
| 7066              | Polythrix kanshul        | Pyrginae         | 09-SRNP-65100       | MHMYE894-09           | GU653708                 |
| 7067              | Polythrix kanshul        | Pyrginae         | 05-SRNP-2332        | MHAHF355-06           | GU150725                 |
| 7068              | Polythrix kanshul        | Pyrginae         | 00-SRNP-11396       | CSRII147-04           | DQ293076                 |
| 7069              | Polythrix kanshul        | Pyrginae         | 00-SRNP-373         | CSRII148-04           | DQ293077                 |
| 7070              | Polythrix kanshul        | Pyrginae         | 04-SRNP-60051       | MHAHE102-05           | GU149864                 |
| 7071              | Polythrix kanshul        | Pyrginae         | 06-SRNP-8907        | MHAHJ499-07           | JF753083                 |
| 7072              | Polythrix kanshul        | Pyrginae         | 06-SRNP-9915        | MHAHJ643-07           | JF753084                 |
| 7073              | Polythrix kanshul        | Pyrginae         | 07-SRNP-738         | MHMXXK268-07          | JF762670                 |
| 7074              | Polythrix kanshul        | Pyrginae         | 07-SRNP-65895       | MHMXR794-08           | JF762669                 |
| 7075              | Polythrix kanshul        | Pyrginae         | 09-SRNP-42534       | MHMYG2429-10          | HM885852                 |
| 7076              | Porphyrogenes sula       | Pyrginae         | 06-SRNP-42916       | MHAHI503-06           | GU156281                 |
| 7077              | Ocyba calathana          | Pyrginae         | 98-SRNP-6146        | CSCR167-04            | DQ292782                 |
| 7078              | Ocyba calathana          | Pyrginae         | 06-SRNP-55791       | MHAHH499-06           | GU155439                 |
| 7079              | Ocyba calathana          | Pyrginae         | 06-SRNP-55767       | MHAHH498-06           | GU155440                 |
| 7080              | Ocyba calathana          | Pyrginae         | 01-SRNP-12165       | CSRII536-04           | DQ292784                 |
| 7081              | Ocyba calathana          | Pyrginae         | 00-SRNP-2597        | CSRII535-04           | DQ292783                 |
| 7082              | Ocyba calathana          | Pyrginae         | 06-SRNP-12192       | MHAHG709-06           | GU151504                 |
| 7083              | Ocyba calathana          | Pyrginae         | 05-SRNP-64295       | MHAHG710-06           | GU151505                 |
| 7084              | Ocyba calathana          | Pyrginae         | 07-SRNP-65680       | MHMXR898-08           | JF762473                 |
| 7085              | Ocyba calathana          | Pyrginae         | 08-SRNP-12162       | MHMXX713-09           | JF778157                 |
| 7086              | Porphyrogenes peterwegei | Pyrginae         | 06-SRNP-41790       | MHAHI024-06           | GU156273                 |
| 7087              | Porphyrogenes peterwegei | Pyrginae         | 06-SRNP-59687       | MHAHK192-07           | JF761061                 |
| 7088              | Porphyrogenes peterwegei | Pyrginae         | 08-SRNP-65472       | MHMXXW033-09          | JF754107                 |
| 7089              | Porphyrogenes peterwegei | Pyrginae         | 07-SRNP-45285       | MHMXP165-08           | JF762681                 |
| 7090              | Porphyrogenes peterwegei | Pyrginae         | 05-SRNP-2308        | MHMXXN282-07          | JF762683                 |
| 7091              | Porphyrogenes peterwegei | Pyrginae         | 05-SRNP-4096        | MHAHI677-06           | GU156280                 |
| 7092              | Porphyrogenes peterwegei | Pyrginae         | 02-SRNP-14654       | CSRII291-04           | DQ293094                 |
| 7093              | Porphyrogenes peterwegei | Pyrginae         | 07-SRNP-65894       | MHMXR765-08           | JF762678                 |
| 7094              | Porphyrogenes peterwegei | Pyrginae         | 06-SRNP-7825        | MHAHJ773-07           | JF753092                 |
| 7095              | Porphyrogenes peterwegei | Pyrginae         | 05-SRNP-25294       | MHAHH502-06           | GU155462                 |
| 7096              | Porphyrogenes peterwegei | Pyrginae         | 06-SRNP-31563       | MHAHH501-06           | GU155460                 |
| 7097              | Porphyrogenes peterwegei | Pyrginae         | 06-SRNP-32892       | MHAHI505-06           | GU156277                 |
| 7098              | Porphyrogenes peterwegei | Pyrginae         | 03-SRNP-6133        | CSCR397-04            | DQ293088                 |
| 7099              | Porphyrogenes peterwegei | Pyrginae         | 07-SRNP-23407       | MHMXR763-08           | JF762680                 |
| 7100              | Porphyrogenes peterwegei | Pyrginae         | 06-SRNP-65685       | MHAHL351-07           | JF762677                 |
| 7101              | Porphyrogenes peterwegei | Pyrginae         | 07-SRNP-31916       | MHAHL349-07           | JF762675                 |
| 7102              | Porphyrogenes peterwegei | Pyrginae         | 07-SRNP-30450       | MHAHL348-07           | JF762674                 |
| 7103              | Porphyrogenes peterwegei | Pyrginae         | 05-SRNP-1922        | MHAHL003-07           | JF762673                 |
| 7104              | Porphyrogenes peterwegei | Pyrginae         | 05-SRNP-41224       | MHMXXN281-07          | JF762684                 |
| 7105              | Porphyrogenes peterwegei | Pyrginae         | 05-SRNP-2099        | MHMXXN280-07          | JF762685                 |
| 7106              | Porphyrogenes peterwegei | Pyrginae         | 05-SRNP-22389       | MHMXXN278-07          | JF762687                 |
| 7107              | Porphyrogenes peterwegei | Pyrginae         | 07-SRNP-40389       | MHMXXK160-07          | JF762688                 |
| 7108              | Porphyrogenes peterwegei | Pyrginae         | 06-SRNP-22070       | MHAHJ775-07           | JF753094                 |
| 7109              | Porphyrogenes peterwegei | Pyrginae         | 06-SRNP-22071       | MHAHJ774-07           | JF753093                 |
| 7110              | Porphyrogenes peterwegei | Pyrginae         | 06-SRNP-22084       | MHAHJ772-07           | JF753091                 |
| 7111              | Porphyrogenes peterwegei | Pyrginae         | 06-SRNP-33708       | MHAHJ771-07           | JF753090                 |

| <b>Tree Order</b> | <b>Species</b>           | <b>Subfamily</b> | <b>ACG Sampleid</b> | <b>BOLD Processid</b> | <b>Genbank Accession</b> |
|-------------------|--------------------------|------------------|---------------------|-----------------------|--------------------------|
| 7112              | Porphyrogenes peterwegei | Pyrginae         | 06-SRNP-43467       | MHAHJ681-07           | JF753087                 |
| 7113              | Porphyrogenes peterwegei | Pyrginae         | 05-SRNP-1925        | MHAHI675-06           | GU156278                 |
| 7114              | Porphyrogenes peterwegei | Pyrginae         | 06-SRNP-45298       | MHAHI022-06           | GU156275                 |
| 7115              | Porphyrogenes peterwegei | Pyrginae         | 06-SRNP-45299       | MHAHI021-06           | GU156276                 |
| 7116              | Porphyrogenes peterwegei | Pyrginae         | 06-SRNP-31354       | MHAHH500-06           | GU155461                 |
| 7117              | Porphyrogenes peterwegei | Pyrginae         | 05-SRNP-43764       | MHAHG713-06           | GU151584                 |
| 7118              | Porphyrogenes peterwegei | Pyrginae         | 04-SRNP-4234        | MHAHD860-05           | GU161796                 |
| 7119              | Porphyrogenes peterwegei | Pyrginae         | 04-SRNP-24187       | MHAHC805-05           | DQ293098                 |
| 7120              | Porphyrogenes peterwegei | Pyrginae         | 04-SRNP-4400        | MHAHC804-05           | DQ293097                 |
| 7121              | Porphyrogenes peterwegei | Pyrginae         | 04-SRNP-45221       | MHAHC127-05           | DQ293095                 |
| 7122              | Porphyrogenes peterwegei | Pyrginae         | 05-SRNP-43653       | MHAHG712-06           | GU151585                 |
| 7123              | Porphyrogenes peterwegei | Pyrginae         | 06-SRNP-22153       | MHAHJ747-07           | JF753089                 |
| 7124              | Porphyrogenes peterwegei | Pyrginae         | 03-SRNP-21521       | CSRII289-04           | DQ293092                 |
| 7125              | Porphyrogenes peterwegei | Pyrginae         | 05-SRNP-45183       | MHAHL002-07           | JF762672                 |
| 7126              | Porphyrogenes peterwegei | Pyrginae         | 07-SRNP-41033       | MHAHL350-07           | JF762676                 |
| 7127              | Porphyrogenes peterwegei | Pyrginae         | 07-SRNP-2767        | MHMXP164-08           | JF762682                 |
| 7128              | Porphyrogenes peterwegei | Pyrginae         | 04-SRNP-22615       | MHAHC803-05           | DQ293096                 |
| 7129              | Porphyrogenes peterwegei | Pyrginae         | 07-SRNP-42518       | MHMXR764-08           | JF762679                 |
| 7130              | Porphyrogenes peterwegei | Pyrginae         | 08-SRNP-65165       | MHMWX027-09           | JF754101                 |
| 7131              | Porphyrogenes peterwegei | Pyrginae         | 08-SRNP-55407       | MHMWX028-09           | JF754102                 |
| 7132              | Porphyrogenes peterwegei | Pyrginae         | 08-SRNP-2369        | MHMWX029-09           | JF754103                 |
| 7133              | Porphyrogenes peterwegei | Pyrginae         | 08-SRNP-65274       | MHMWX030-09           | JF754104                 |
| 7134              | Porphyrogenes peterwegei | Pyrginae         | 08-SRNP-2549        | MHMWX031-09           | JF754105                 |
| 7135              | Porphyrogenes peterwegei | Pyrginae         | 08-SRNP-2551        | MHMWX032-09           | JF754106                 |
| 7136              | Porphyrogenes peterwegei | Pyrginae         | 08-SRNP-2281        | MHMWX034-09           | JF754108                 |
| 7137              | Porphyrogenes peterwegei | Pyrginae         | 08-SRNP-2554        | MHMWX035-09           | JF754109                 |
| 7138              | Porphyrogenes peterwegei | Pyrginae         | 08-SRNP-2550        | MHMWX036-09           | JF754110                 |
| 7139              | Porphyrogenes peterwegei | Pyrginae         | 08-SRNP-65453       | MHMWX038-09           | JF754111                 |
| 7140              | Porphyrogenes peterwegei | Pyrginae         | 08-SRNP-65190       | MHMWX039-09           | JF754112                 |
| 7141              | Porphyrogenes peterwegei | Pyrginae         | 08-SRNP-5053        | MHMXX624-09           | JF778412                 |
| 7142              | Porphyrogenes peterwegei | Pyrginae         | 08-SRNP-4015        | MHMXX625-09           | JF778413                 |
| 7143              | Porphyrogenes peterwegei | Pyrginae         | 08-SRNP-65797       | MHMXY1081-09          | HM390681                 |
| 7144              | Porphyrogenes peterwegei | Pyrginae         | 08-SRNP-5051        | MHMYC547-09           | GU649800                 |
| 7145              | Porphyrogenes peterwegei | Pyrginae         | 09-SRNP-70382       | MHMYE1517-09          | GU653487                 |
| 7146              | Porphyrogenes peterwegei | Pyrginae         | 09-SRNP-21376       | MHMYG2473-10          | HM885900                 |
| 7147              | Porphyrogenes peterwegei | Pyrginae         | 03-SRNP-20026       | CSRII288-04           | DQ293091                 |
| 7148              | Porphyrogenes peterwegei | Pyrginae         | 03-SRNP-9403        | CSRII286-04           | DQ293089                 |
| 7149              | Porphyrogenes peterwegei | Pyrginae         | 02-SRNP-6580        | CSRII290-04           | DQ293093                 |
| 7150              | Porphyrogenes peterwegei | Pyrginae         | 05-SRNP-42535       | MHAHI676-06           | GU156279                 |
| 7151              | Porphyrogenes peterwegei | Pyrginae         | 06-SRNP-32698       | MHAHI020-06           | GU156274                 |
| 7152              | Porphyrogenes peterwegei | Pyrginae         | 06-SRNP-32697       | MHAHI023-06           | GU156272                 |
| 7153              | Porphyrogenes peterwegei | Pyrginae         | 06-SRNP-22072       | MHAHJ746-07           | JF753088                 |
| 7154              | Porphyrogenes peterwegei | Pyrginae         | 03-SRNP-9405        | CSRII287-04           | DQ293090                 |
| 7155              | Porphyrogenes peterwegei | Pyrginae         | 02-SRNP-21541       | CSCR208-04            | DQ293087                 |
| 7156              | Porphyrogenes peterwegei | Pyrginae         | 06-SRNP-22118       | MHAHJ501-07           | JF753086                 |
| 7157              | Porphyrogenes peterwegei | Pyrginae         | 07-SRNP-904         | MHMXX159-07           | JF762689                 |
| 7158              | Porphyrogenes peterwegei | Pyrginae         | 05-SRNP-46602       | MHMXXN279-07          | JF762686                 |
| 7159              | Porphyrogenes peterwegei | Pyrginae         | 09-SRNP-2624        | MHMYG2474-10          | HM885901                 |
| 7160              | Calliades zeutus         | Pyrginae         | 05-SRNP-58434       | MHAHF349-06           | GU150300                 |
| 7161              | Calliades zeutus         | Pyrginae         | 06-SRNP-19561       | MHMXXK042-07          | JF761737                 |
| 7162              | Calliades zeutus         | Pyrginae         | 07-SRNP-20366       | MHMXXK041-07          | JF761738                 |
| 7163              | Calliades zeutus         | Pyrginae         | 06-SRNP-58046       | MHAHJ785-07           | JF752494                 |
| 7164              | Calliades zeutus         | Pyrginae         | 04-SRNP-49938       | MHAHD908-05           | GU161302                 |
| 7165              | Calliades zeutus         | Pyrginae         | 04-SRNP-14586       | MHAHD907-05           | GU161304                 |
| 7166              | Calliades zeutus         | Pyrginae         | 04-SRNP-14067       | MHAHD906-05           | GU161300                 |
| 7167              | Calliades zeutus         | Pyrginae         | 04-SRNP-49935       | MHAHD905-05           | GU161303                 |



| <b>Tree Order</b> | <b>Species</b>      | <b>Subfamily</b> | <b>ACG Sampleid</b> | <b>BOLD Processid</b> | <b>Genbank Accession</b> |
|-------------------|---------------------|------------------|---------------------|-----------------------|--------------------------|
| 7168              | Calliades zeutus    | Pyrginae         | 04-SRNP-49393       | MHAHD904-05           | GU161301                 |
| 7169              | Calliades zeutus    | Pyrginae         | 05-SRNP-61209       | MHAHF744-06           | GU150302                 |
| 7170              | Calliades zeutus    | Pyrginae         | 06-SRNP-19539       | MHMXI085-07           | JF760458                 |
| 7171              | Calliades zeutus    | Pyrginae         | 05-SRNP-55236       | MHAHF350-06           | GU150301                 |
| 7172              | Calliades zeutus    | Pyrginae         | 02-SRNP-4294        | CSRII110-04           | DQ291955                 |
| 7173              | Calliades zeutus    | Pyrginae         | 02-SRNP-4104        | CSRII109-04           | DQ291954                 |
| 7174              | Calliades zeutus    | Pyrginae         | 07-SRNP-20861       | MHMXN295-07           | JF761736                 |
| 7175              | Calliades zeutus    | Pyrginae         | 07-SRNP-21845       | MHMXN297-07           | JF761735                 |
| 7176              | Calliades zeutus    | Pyrginae         | 07-SRNP-21844       | MHMXN299-07           | JF761734                 |
| 7177              | Proteides mercurius | Pyrginae         | 95-SRNP-6422        | MHAHK561-07           | JF761062                 |
| 7178              | Proteides mercurius | Pyrginae         | 05-SRNP-59505       | MHAHF847-06           | GU150727                 |
| 7179              | Proteides mercurius | Pyrginae         | 95-SRNP-4261        | MHAHK564-07           | JF761065                 |
| 7180              | Proteides mercurius | Pyrginae         | 95-SRNP-7319        | MHAHK569-07           | JF761069                 |
| 7181              | Proteides mercurius | Pyrginae         | 02-SRNP-4516        | MHAHK571-07           | JF761071                 |
| 7182              | Proteides mercurius | Pyrginae         | 95-SRNP-74          | MHAHK568-07           | JF761068                 |
| 7183              | Proteides mercurius | Pyrginae         | 00-SRNP-2023        | MHAHK570-07           | JF761070                 |
| 7184              | Proteides mercurius | Pyrginae         | 99-SRNP-6062        | MHAHK572-07           | JF761072                 |
| 7185              | Proteides mercurius | Pyrginae         | 95-SRNP-6413        | MHAHK562-07           | JF761063                 |
| 7186              | Proteides mercurius | Pyrginae         | 95-SRNP-7833        | MHAHK567-07           | JF761067                 |
| 7187              | Proteides mercurius | Pyrginae         | 04-SRNP-2133        | MHAHC717-05           | DQ293121                 |
| 7188              | Proteides mercurius | Pyrginae         | 05-SRNP-19609       | MHAHF846-06           | GU150726                 |
| 7189              | Proteides mercurius | Pyrginae         | 04-SRNP-14109       | MHAHC718-05           | DQ293122                 |
| 7190              | Proteides mercurius | Pyrginae         | 95-SRNP-6352        | MHAHK566-07           | JF761066                 |
| 7191              | Proteides mercurius | Pyrginae         | 95-SRNP-4269        | MHAHK563-07           | JF761064                 |
| 7192              | Proteides mercurius | Pyrginae         | 06-SRNP-55587       | MHAHG157-06           | GU151587                 |
| 7193              | Proteides mercurius | Pyrginae         | 95-SRNP-6265        | CSCR212-04            | DQ293120                 |
| 7194              | Proteides mercurius | Pyrginae         | 07-SRNP-40797       | MHMXN334-07           | JF762697                 |
| 7195              | Spathilepia clonius | Pyrginae         | 95-SRNP-9249        | CSCR250-04            | DQ293326                 |
| 7196              | Spathilepia clonius | Pyrginae         | 02-SRNP-5756        | CSRII477-04           | DQ293328                 |
| 7197              | Spathilepia clonius | Pyrginae         | 07-SRNP-20091       | MHMXX026-07           | JF762932                 |
| 7198              | Spathilepia clonius | Pyrginae         | 05-SRNP-20626       | MHAHD713-05           | GU161850                 |
| 7199              | Spathilepia clonius | Pyrginae         | 07-SRNP-20254       | MHMXX029-07           | JF762929                 |
| 7200              | Spathilepia clonius | Pyrginae         | 04-SRNP-47760       | MHAHD871-05           | GU161851                 |
| 7201              | Spathilepia clonius | Pyrginae         | 04-SRNP-27278       | MHAHF288-06           | GU150852                 |
| 7202              | Spathilepia clonius | Pyrginae         | 05-SRNP-46985       | MHAHF289-06           | GU150851                 |
| 7203              | Spathilepia clonius | Pyrginae         | 07-SRNP-20183       | MHMXX027-07           | JF762931                 |
| 7204              | Spathilepia clonius | Pyrginae         | 01-SRNP-15478       | CSRII476-04           | DQ293327                 |
| 7205              | Spathilepia clonius | Pyrginae         | 07-SRNP-20074       | MHMXX025-07           | JF762933                 |
| 7206              | Spathilepia clonius | Pyrginae         | 07-SRNP-20201       | MHMXX028-07           | JF762930                 |
| 7207              | Spathilepia clonius | Pyrginae         | 07-SRNP-20075       | MHMXX030-07           | JF762928                 |
| 7208              | Spathilepia clonius | Pyrginae         | 09-SRNP-76098       | MHMYH135-10           | HM887283                 |
| 7209              | Narcosius samson    | Pyrginae         | 05-SRNP-32509       | MHAHF691-06           | GU150569                 |
| 7210              | Narcosius samson    | Pyrginae         | 02-SRNP-3561        | CSCR142-04            | DQ292674                 |
| 7211              | Narcosius samson    | Pyrginae         | 02-SRNP-18532       | CSCR461-04            | DQ292671                 |
| 7212              | Narcosius samson    | Pyrginae         | 07-SRNP-45154       | MHMXX107-07           | JF762400                 |
| 7213              | Narcosius samson    | Pyrginae         | 05-SRNP-21384       | MHAHF229-06           | GU150567                 |
| 7214              | Narcosius samson    | Pyrginae         | 04-SRNP-23182       | MHAHD709-05           | GU161685                 |
| 7215              | Narcosius samson    | Pyrginae         | 04-SRNP-46044       | MHAHD708-05           | GU161684                 |
| 7216              | Narcosius samson    | Pyrginae         | 07-SRNP-2014        | MHAHL519-07           | JF762386                 |
| 7217              | Narcosius samson    | Pyrginae         | 07-SRNP-33701       | MHMXT237-08           | JF762398                 |
| 7218              | Narcosius samson    | Pyrginae         | 08-SRNP-30598       | MHMXX952-09           | JF778110                 |
| 7219              | Narcosius samson    | Pyrginae         | 05-SRNP-22628       | MHAHF690-06           | GU150570                 |
| 7220              | Narcosius samson    | Pyrginae         | 06-SRNP-6237        | MHAHI108-06           | GU156006                 |
| 7221              | Narcosius samson    | Pyrginae         | 02-SRNP-373         | CSCR465-04            | DQ292672                 |
| 7222              | Narcosius samson    | Pyrginae         | 07-SRNP-65943       | MHMXT244-08           | JF762391                 |
| 7223              | Narcosius samson    | Pyrginae         | 07-SRNP-65845       | MHMXT243-08           | JF762392                 |

| <b>Tree Order</b> | <b>Species</b>      | <b>Subfamily</b> | <b>ACG Sampleid</b> | <b>BOLD Processid</b> | <b>Genbank Accession</b> |
|-------------------|---------------------|------------------|---------------------|-----------------------|--------------------------|
| 7224              | Narcosius samson    | Pyrginae         | 08-SRNP-40054       | MHMXT242-08           | JF762393                 |
| 7225              | Narcosius samson    | Pyrginae         | 07-SRNP-4271        | MHMXT241-08           | JF762394                 |
| 7226              | Narcosius samson    | Pyrginae         | 07-SRNP-4275        | MHMXT240-08           | JF762395                 |
| 7227              | Narcosius samson    | Pyrginae         | 07-SRNP-4276        | MHMXT239-08           | JF762396                 |
| 7228              | Narcosius samson    | Pyrginae         | 08-SRNP-65210       | MHMXS093-08           | JF762399                 |
| 7229              | Narcosius samson    | Pyrginae         | 07-SRNP-41022       | MHAHL522-07           | JF762389                 |
| 7230              | Narcosius samson    | Pyrginae         | 07-SRNP-1456        | MHAHL521-07           | JF762388                 |
| 7231              | Narcosius samson    | Pyrginae         | 07-SRNP-1341        | MHAHL520-07           | JF762387                 |
| 7232              | Narcosius samson    | Pyrginae         | 06-SRNP-33348       | MHAHI113-06           | GU156005                 |
| 7233              | Narcosius samson    | Pyrginae         | 04-SRNP-60936       | MHAHF219-06           | GU150568                 |
| 7234              | Narcosius samson    | Pyrginae         | 07-SRNP-33230       | MHMXT238-08           | JF762397                 |
| 7235              | Narcosius samson    | Pyrginae         | 02-SRNP-1251        | CSCR141-04            | DQ292673                 |
| 7236              | Narcosius samson    | Pyrginae         | 07-SRNP-4272        | MHMXT245-08           | JF762390                 |
| 7237              | Narcosius samson    | Pyrginae         | 08-SRNP-1747        | MHMXX955-09           | JF778111                 |
| 7238              | Narcosius colossus  | Pyrginae         | 07-SRNP-1788        | MHAHL518-07           | JF762377                 |
| 7239              | Narcosius colossus  | Pyrginae         | 05-SRNP-3183        | MHAHF221-06           | GU150562                 |
| 7240              | Narcosius colossus  | Pyrginae         | 05-SRNP-35254       | MHAHF230-06           | GU150561                 |
| 7241              | Narcosius colossus  | Pyrginae         | 04-SRNP-34370       | MHAHD707-05           | GU161678                 |
| 7242              | Narcosius colossus  | Pyrginae         | 05-SRNP-35044       | MHAHF218-06           | GU150563                 |
| 7243              | Narcosius colossus  | Pyrginae         | 07-SRNP-60189       | MHMXR843-08           | JF762379                 |
| 7244              | Narcosius colossus  | Pyrginae         | 07-SRNP-58794       | MHMXR844-08           | JF762378                 |
| 7245              | Narcosius colossus  | Pyrginae         | 07-SRNP-1843        | MHAHL517-07           | JF762376                 |
| 7246              | Narcosius colossus  | Pyrginae         | 03-SRNP-79          | CSCR381-04            | DQ292669                 |
| 7247              | Narcosius colossus  | Pyrginae         | 06-SRNP-4365        | MHAHI110-06           | GU156003                 |
| 7248              | Narcosius colossus  | Pyrginae         | 06-SRNP-35026       | MHAHG703-06           | GU151483                 |
| 7249              | Narcosius colossus  | Pyrginae         | 06-SRNP-2399        | MHAHG702-06           | GU151482                 |
| 7250              | Narcosius colossus  | Pyrginae         | 06-SRNP-12012       | MHAHG701-06           | GU151481                 |
| 7251              | Narcosius colossus  | Pyrginae         | 04-SRNP-61447       | MHAHF220-06           | GU150564                 |
| 7252              | Narcosius colossus  | Pyrginae         | 04-SRNP-35290       | MHAHD724-05           | GU161679                 |
| 7253              | Narcosius colossus  | Pyrginae         | 04-SRNP-35050       | MHAHD723-05           | GU161681                 |
| 7254              | Narcosius colossus  | Pyrginae         | 04-SRNP-35268       | MHAHD721-05           | GU161682                 |
| 7255              | Narcosius colossus  | Pyrginae         | 04-SRNP-35266       | MHAHD720-05           | GU161683                 |
| 7256              | Narcosius colossus  | Pyrginae         | 05-SRNP-35355       | MHAHF224-06           | GU150560                 |
| 7257              | Narcosius colossus  | Pyrginae         | 06-SRNP-31983       | MHAHH492-06           | GU155434                 |
| 7258              | Narcosius colossus  | Pyrginae         | 02-SRNP-9121        | CSCR471-04            | DQ292668                 |
| 7259              | Narcosius colossus  | Pyrginae         | 06-SRNP-36131       | MHAHK196-07           | JF760884                 |
| 7260              | Narcosius colossus  | Pyrginae         | 07-SRNP-1842        | MHMXXN252-07          | JF762384                 |
| 7261              | Narcosius colossus  | Pyrginae         | 07-SRNP-60168       | MHMXR842-08           | JF762380                 |
| 7262              | Narcosius colossus  | Pyrginae         | 08-SRNP-1953        | MHMXX954-09           | JF778107                 |
| 7263              | Narcosius colossus  | Pyrginae         | 08-SRNP-2685        | MHMXX956-09           | JF778108                 |
| 7264              | Narcosius colossus  | Pyrginae         | 08-SRNP-2684        | MHMXX957-09           | JF778109                 |
| 7265              | Narcosius colossus  | Pyrginae         | 07-SRNP-57343       | MHMXP136-08           | JF762383                 |
| 7266              | Narcosius colossus  | Pyrginae         | 07-SRNP-23367       | MHMXR841-08           | JF762381                 |
| 7267              | Narcosius colossus  | Pyrginae         | 04-SRNP-35101       | MHAHD722-05           | GU161680                 |
| 7268              | Narcosius colossus  | Pyrginae         | 05-SRNP-2080        | MHAHF222-06           | GU150565                 |
| 7269              | Narcosius colossus  | Pyrginae         | 07-SRNP-23315       | MHMXR840-08           | JF762382                 |
| 7270              | Narcosius colossus  | Pyrginae         | 08-SRNP-4789        | MHMXX698-09           | JF778106                 |
| 7271              | Narcosius helen     | Pyrginae         | 96-SRNP-7367        | CSCR139-04            | DQ292670                 |
| 7272              | Narcosius helen     | Pyrginae         | 06-SRNP-59517       | MHAHK194-07           | JF760886                 |
| 7273              | Narcosius helen     | Pyrginae         | 06-SRNP-22184       | MHAHJ789-07           | JF752937                 |
| 7274              | Narcosius helen     | Pyrginae         | 06-SRNP-3211        | MHAHI109-06           | GU156004                 |
| 7275              | Narcosius helen     | Pyrginae         | 05-SRNP-65551       | MHAHF689-06           | GU150566                 |
| 7276              | Narcosius helen     | Pyrginae         | 06-SRNP-46972       | MHAHJ758-07           | JF752936                 |
| 7277              | Narcosius helen     | Pyrginae         | 06-SRNP-60063       | MHAHK193-07           | JF760885                 |
| 7278              | Narcosius helen     | Pyrginae         | 07-SRNP-57650       | MHMXP132-08           | JF762385                 |
| 7279              | Narcosius nazaraeus | Pyrginae         | 09-SRNP-20099       | MHMYB188-09           | HM431658                 |

| <b>Tree Order</b> | <b>Species</b>          | <b>Subfamily</b> | <b>ACG Sampleid</b> | <b>BOLD Processid</b> | <b>Genbank Accession</b> |
|-------------------|-------------------------|------------------|---------------------|-----------------------|--------------------------|
| 7280              | Aguna claxon            | Eudaminae        | 05-SRNP-41660       | MHAHE433-05           | GU149333                 |
| 7281              | Aguna claxon            | Eudaminae        | 05-SRNP-41659       | MHAHE436-05           | GU149332                 |
| 7282              | Aguna claxon            | Eudaminae        | 05-SRNP-41925       | MHAHE614-06           | GU149334                 |
| 7283              | Aguna claxon            | Eudaminae        | 06-SRNP-42825       | MHAHJ894-07           | JF752350                 |
| 7284              | Aguna claxon            | Eudaminae        | 07-SRNP-41625       | MHAHL403-07           | JF761356                 |
| 7285              | Aguna claxon            | Eudaminae        | 09-SRNP-44598       | MHMYE1463-09          | GU653536                 |
| 7286              | Aguna panama            | Eudaminae        | 07-SRNP-55426       | MHMXK262-07           | JF761359                 |
| 7287              | Aguna panama            | Eudaminae        | 00-SRNP-6020        | CSRII354-04           | DQ291798                 |
| 7288              | Aguna panama            | Eudaminae        | 07-SRNP-61073       | MHMXW478-09           | JF753647                 |
| 7289              | Aguna panama            | Eudaminae        | 07-SRNP-56460       | MHAHL402-07           | JF761358                 |
| 7290              | Aguna panama            | Eudaminae        | 06-SRNP-58291       | MHMXH840-07           | JF760226                 |
| 7291              | Aguna panama            | Eudaminae        | 05-SRNP-57368       | MHAHE435-05           | GU149338                 |
| 7292              | Aguna panama            | Eudaminae        | 00-SRNP-6052        | CSRII355-04           | DQ291799                 |
| 7293              | Aguna panama            | Eudaminae        | 08-SRNP-55747       | MHMXW479-09           | JF753648                 |
| 7294              | Aguna panama            | Eudaminae        | 07-SRNP-61072       | MHMXW480-09           | JF753649                 |
| 7295              | Aguna panama            | Eudaminae        | 08-SRNP-55705       | MHMXW525-09           | JF753646                 |
| 7296              | Aguna panama            | Eudaminae        | 09-SRNP-57341       | MHMYE1462-09          | GU653535                 |
| 7297              | Aguna metophis          | Eudaminae        | 05-SRNP-41056       | MHAHD391-05           | GU161222                 |
| 7298              | Aguna asander           | Eudaminae        | 05-SRNP-56838       | MHAHE437-05           | GU149327                 |
| 7299              | Aguna asander           | Eudaminae        | 06-SRNP-56534       | MHAHI116-06           | GU155733                 |
| 7300              | Aguna asander           | Eudaminae        | 07-SRNP-56019       | MHMXK115-07           | JF761352                 |
| 7301              | Aguna asander           | Eudaminae        | 07-SRNP-56139       | MHMXK113-07           | JF761354                 |
| 7302              | Aguna asander           | Eudaminae        | 05-SRNP-56840       | MHAHE439-05           | GU149325                 |
| 7303              | Aguna asander           | Eudaminae        | 05-SRNP-56839       | MHAHE438-05           | GU149326                 |
| 7304              | Aguna asander           | Eudaminae        | 06-SRNP-56535       | MHAHI120-06           | GU155731                 |
| 7305              | Aguna asander           | Eudaminae        | 07-SRNP-56140       | MHMXK112-07           | JF761355                 |
| 7306              | Aguna asander           | Eudaminae        | 07-SRNP-56354       | MHMXN318-07           | JF761351                 |
| 7307              | Aguna asander           | Eudaminae        | 07-SRNP-57812       | MHMXP137-08           | JF761345                 |
| 7308              | Aguna asander           | Eudaminae        | 07-SRNP-56518       | MHMXN320-07           | JF761349                 |
| 7309              | Aguna asander           | Eudaminae        | 07-SRNP-56519       | MHMXK114-07           | JF761353                 |
| 7310              | Aguna asander           | Eudaminae        | 07-SRNP-56833       | MHMXN322-07           | JF761347                 |
| 7311              | Aguna asander           | Eudaminae        | 98-SRNP-3363        | CSCR009-04            | DQ291783                 |
| 7312              | Aguna asander           | Eudaminae        | 06-SRNP-56500       | MHAHI118-06           | GU155732                 |
| 7313              | Aguna asander           | Eudaminae        | 06-SRNP-56093       | MHAHI119-06           | GU155734                 |
| 7314              | Aguna asander           | Eudaminae        | 97-SRNP-2360        | CSCR008-04            | DQ291782                 |
| 7315              | Aguna asander           | Eudaminae        | 07-SRNP-56789       | MHMXN319-07           | JF761350                 |
| 7316              | Aguna asander           | Eudaminae        | 06-SRNP-56319       | MHAHI117-06           | GU155735                 |
| 7317              | Aguna asander           | Eudaminae        | 07-SRNP-56524       | MHMXN321-07           | JF761348                 |
| 7318              | Aguna asander           | Eudaminae        | 07-SRNP-56433       | MHMXN323-07           | JF761346                 |
| 7319              | Aguna asander           | Eudaminae        | 07-SRNP-57226       | MHMXP138-08           | JF761344                 |
| 7320              | Aguna asander           | Eudaminae        | 07-SRNP-56791       | MHMXP139-08           | JF761343                 |
| 7321              | Aguna arunce hypozonius | Eudaminae        | 05-SRNP-57391       | MHAHE434-05           | GU149336                 |
| 7322              | Aguna arunce hypozonius | Eudaminae        | 05-SRNP-57392       | MHAHE432-05           | GU149337                 |
| 7323              | Aguna arunce hypozonius | Eudaminae        | 05-SRNP-57393       | MHAHE431-05           | GU149335                 |
| 7324              | Aguna arunce hypozonius | Eudaminae        | 07-SRNP-56141       | MHMXK007-07           | JF761342                 |
| 7325              | Aguna arunce hypozonius | Eudaminae        | 07-SRNP-58253       | MHMXN251-07           | JF761341                 |
| 7326              | Aguna Burns01           | Eudaminae        | 04-SRNP-42390       | MHAHE098-05           | GU149329                 |
| 7327              | Aguna Burns01           | Eudaminae        | 03-SRNP-21307       | CSCR475-04            | DQ291784                 |
| 7328              | Aguna Burns01           | Eudaminae        | 03-SRNP-21306       | CSRII398-04           | DQ291786                 |
| 7329              | Aguna Burns01           | Eudaminae        | 03-SRNP-37032       | CSRII091-04           | DQ291785                 |
| 7330              | Aguna Burns01           | Eudaminae        | 05-SRNP-41612       | MHAHE430-05           | GU149328                 |
| 7331              | Aguna Burns01           | Eudaminae        | 05-SRNP-70024       | MHAHF598-06           | GU150159                 |
| 7332              | Aguna Burns01           | Eudaminae        | 03-SRNP-21373       | CSRII399-04           | DQ291787                 |
| 7333              | Aguna Burns01           | Eudaminae        | 03-SRNP-21386       | CSRII400-04           | DQ291788                 |
| 7334              | Aguna Burns01           | Eudaminae        | 08-SRNP-71779       | MHMXW482-09           | JF753643                 |
| 7335              | Aguna Burns01           | Eudaminae        | 08-SRNP-71112       | MHMXW477-09           | JF753641                 |

| <b>Tree Order</b> | <b>Species</b>         | <b>Subfamily</b> | <b>ACG Sampleid</b> | <b>BOLD Processid</b> | <b>Genbank Accession</b> |
|-------------------|------------------------|------------------|---------------------|-----------------------|--------------------------|
| 7336              | Aguna Burns01          | Eudaminae        | 08-SRNP-71115       | MHMWX481-09           | JF753642                 |
| 7337              | Aguna Burns01          | Eudaminae        | 08-SRNP-71111       | MHMWX483-09           | JF753644                 |
| 7338              | Aguna coeloides        | Eudaminae        | 07-SRNP-31814       | MHAHL404-07           | JF761357                 |
| 7339              | Aguna coeloides        | Eudaminae        | 02-SRNP-6676        | CSRII381-04           | DQ291795                 |
| 7340              | Aguna coeloides        | Eudaminae        | 03-SRNP-20032       | CSCR474-04            | DQ291794                 |
| 7341              | Aguna coeloides        | Eudaminae        | 03-SRNP-20033       | CSRII396-04           | DQ291796                 |
| 7342              | Aguna coeloides        | Eudaminae        | 02-SRNP-6344        | CSRII428-04           | DQ291797                 |
| 7343              | Aguna coeloides        | Eudaminae        | 08-SRNP-71144       | MHMWX484-09           | JF753645                 |
| 7344              | Aguna coeloides        | Eudaminae        | 08-SRNP-32489       | MHMXY1012-09          | GU666517                 |
| 7345              | Aguna Burns02          | Eudaminae        | 03-SRNP-10346       | CSCR300-04            | DQ291789                 |
| 7346              | Aguna Burns02          | Eudaminae        | 05-SRNP-43291       | MHAHF599-06           | GU150160                 |
| 7347              | Aguna Burns02          | Eudaminae        | 05-SRNP-42263       | MHAHE613-06           | GU149331                 |
| 7348              | Aguna Burns02          | Eudaminae        | 05-SRNP-40266       | MHAHE429-05           | GU149330                 |
| 7349              | Aguna Burns02          | Eudaminae        | 03-SRNP-10765       | CSRII395-04           | DQ291793                 |
| 7350              | Aguna Burns02          | Eudaminae        | 03-SRNP-10241       | CSCR476-04            | DQ291791                 |
| 7351              | Aguna Burns02          | Eudaminae        | 03-SRNP-10064       | CSCR301-04            | DQ291790                 |
| 7352              | Aguna Burns02          | Eudaminae        | 03-SRNP-31756       | CSRII090-04           | DQ291792                 |
| 7353              | Aguna Burns02          | Eudaminae        | 06-SRNP-42285       | MHAHI128-06           | GU155737                 |
| 7354              | Aguna Burns02          | Eudaminae        | 06-SRNP-42575       | MHAHI497-06           | GU155736                 |
| 7355              | Aguna Burns02          | Eudaminae        | 06-SRNP-42313       | MHAHI604-06           | GU155738                 |
| 7356              | Aguna Burns02          | Eudaminae        | 06-SRNP-44328       | MHAHJ607-07           | JF752348                 |
| 7357              | Aguna Burns02          | Eudaminae        | 06-SRNP-44327       | MHAHJ893-07           | JF752349                 |
| 7358              | Aguna Burns02          | Eudaminae        | 09-SRNP-69431       | MHMYH151-10           | HM887299                 |
| 7359              | Aguna Burns02          | Eudaminae        | 09-SRNP-69465       | MHMYH153-10           | HM887301                 |
| 7360              | Autochton bipunctatus  | Pyrginae         | 08-SRNP-30643       | MHMWX323-09           | JF753703                 |
| 7361              | Autochton Burns01DHJ02 | Pyrginae         | 04-SRNP-45713       | MHAHD313-05           | GU161297                 |
| 7362              | Autochton Burns01DHJ02 | Pyrginae         | 08-SRNP-1103        | MHMWX322-09           | JF753715                 |
| 7363              | Autochton Burns01DHJ02 | Pyrginae         | 08-SRNP-1650        | MHMWX317-09           | JF753713                 |
| 7364              | Autochton Burns01DHJ02 | Pyrginae         | 08-SRNP-1753        | MHMWX315-09           | JF753712                 |
| 7365              | Autochton Burns01DHJ02 | Pyrginae         | 02-SRNP-2645        | MHAHK437-07           | JF760401                 |
| 7366              | Autochton Burns01DHJ02 | Pyrginae         | 03-SRNP-19145       | MHAHK422-07           | JF760400                 |
| 7367              | Autochton Burns01DHJ02 | Pyrginae         | 06-SRNP-59183       | MHAHK032-07           | JF760398                 |
| 7368              | Autochton Burns01DHJ02 | Pyrginae         | 02-SRNP-2824        | MHAHI305-06           | GU155842                 |
| 7369              | Autochton Burns01DHJ02 | Pyrginae         | 02-SRNP-2646        | MHAHI302-06           | GU155841                 |
| 7370              | Autochton Burns01DHJ02 | Pyrginae         | 02-SRNP-2647        | MHAHI300-06           | GU155831                 |
| 7371              | Autochton Burns01DHJ02 | Pyrginae         | 02-SRNP-2644        | MHAHI299-06           | GU155834                 |
| 7372              | Autochton Burns01DHJ02 | Pyrginae         | 02-SRNP-2825        | MHAHI298-06           | GU155836                 |
| 7373              | Autochton Burns01DHJ02 | Pyrginae         | 02-SRNP-2822        | MHAHI297-06           | GU155835                 |
| 7374              | Autochton Burns01DHJ02 | Pyrginae         | 02-SRNP-2821        | MHAHI296-06           | GU155838                 |
| 7375              | Autochton Burns01DHJ02 | Pyrginae         | 02-SRNP-6791        | MHAHI294-06           | GU155840                 |
| 7376              | Autochton Burns01DHJ02 | Pyrginae         | 02-SRNP-2643        | MHAHI292-06           | GU155833                 |
| 7377              | Autochton Burns01DHJ02 | Pyrginae         | 06-SRNP-2611        | MHAHG630-06           | GU151209                 |
| 7378              | Autochton Burns01DHJ02 | Pyrginae         | 06-SRNP-1336        | MHAHG629-06           | GU151210                 |
| 7379              | Autochton Burns01DHJ02 | Pyrginae         | 04-SRNP-45765       | MHAHD312-05           | GU161296                 |
| 7380              | Autochton Burns01DHJ02 | Pyrginae         | 00-SRNP-3690        | MHAHI295-06           | GU155837                 |
| 7381              | Autochton Burns01DHJ02 | Pyrginae         | 05-SRNP-46948       | MHAHE596-06           | GU149432                 |
| 7382              | Autochton Burns01DHJ02 | Pyrginae         | 01-SRNP-1372        | MHAHI293-06           | GU155839                 |
| 7383              | Autochton Burns01DHJ02 | Pyrginae         | 02-SRNP-2823        | MHAHI301-06           | GU155832                 |
| 7384              | Autochton Burns01DHJ02 | Pyrginae         | 05-SRNP-59071       | MHAHE598-06           | GU149433                 |
| 7385              | Autochton Burns01DHJ02 | Pyrginae         | 06-SRNP-9152        | MHAHJ453-07           | JF752470                 |
| 7386              | Autochton Burns01DHJ02 | Pyrginae         | 06-SRNP-9303        | MHAHK033-07           | JF760399                 |
| 7387              | Autochton Burns01DHJ02 | Pyrginae         | 08-SRNP-1961        | MHMWX320-09           | JF753714                 |
| 7388              | Autochton Burns01DHJ02 | Pyrginae         | 08-SRNP-1113        | MHMWX324-09           | JF753716                 |
| 7389              | Autochton Burns01DHJ02 | Pyrginae         | 08-SRNP-1014        | MHMWX325-09           | JF753717                 |
| 7390              | Autochton Burns01DHJ02 | Pyrginae         | 08-SRNP-1534        | MHMWX326-09           | JF753718                 |
| 7391              | Autochton Burns01DHJ02 | Pyrginae         | 08-SRNP-1533        | MHMWX327-09           | JF753704                 |

| <b>Tree Order</b> | <b>Species</b>         | <b>Subfamily</b> | <b>ACG Sampleid</b> | <b>BOLD Processid</b> | <b>Genbank Accession</b> |
|-------------------|------------------------|------------------|---------------------|-----------------------|--------------------------|
| 7392              | Autochton Burns01DHJ02 | Pyrginae         | 08-SRNP-40551       | MHMXW328-09           | JF753705                 |
| 7393              | Autochton Burns01DHJ02 | Pyrginae         | 08-SRNP-749         | MHMXW332-09           | JF753706                 |
| 7394              | Autochton Burns01DHJ02 | Pyrginae         | 08-SRNP-718         | MHMXW334-09           | JF753707                 |
| 7395              | Autochton Burns01DHJ02 | Pyrginae         | 08-SRNP-1752        | MHMXW337-09           | JF753708                 |
| 7396              | Autochton Burns01DHJ02 | Pyrginae         | 08-SRNP-1710        | MHMXW338-09           | JF753709                 |
| 7397              | Autochton Burns01DHJ02 | Pyrginae         | 08-SRNP-1649        | MHMXW339-09           | JF753710                 |
| 7398              | Autochton Burns01DHJ02 | Pyrginae         | 08-SRNP-1532        | MHMXW340-09           | JF753711                 |
| 7399              | Autochton Burns01DHJ03 | Pyrginae         | 03-SRNP-21795       | MHAHK434-07           | JF760414                 |
| 7400              | Autochton Burns01DHJ03 | Pyrginae         | 05-SRNP-5444        | MHAHE597-06           | GU149435                 |
| 7401              | Autochton Burns01DHJ04 | Pyrginae         | 01-SRNP-2361        | MHAHK417-07           | JF760431                 |
| 7402              | Autochton Burns01DHJ03 | Pyrginae         | 03-SRNP-8841        | MHAHK419-07           | JF760408                 |
| 7403              | Autochton Burns01DHJ03 | Pyrginae         | 02-SRNP-7452        | MHAHK453-07           | JF760421                 |
| 7404              | Autochton Burns01DHJ04 | Pyrginae         | 05-SRNP-42409       | MHAHE599-06           | GU149434                 |
| 7405              | Autochton Burns01DHJ03 | Pyrginae         | 02-SRNP-7369        | MHAHK454-07           | JF760422                 |
| 7406              | Autochton Burns01DHJ03 | Pyrginae         | 02-SRNP-19075       | MHAHK455-07           | JF760423                 |
| 7407              | Autochton Burns01DHJ03 | Pyrginae         | 07-SRNP-1204        | MHMXXK052-07          | JF761675                 |
| 7408              | Autochton Burns01DHJ03 | Pyrginae         | 00-SRNP-11807       | MHAHK411-07           | JF760407                 |
| 7409              | Autochton Burns01DHJ03 | Pyrginae         | 01-SRNP-2359        | MHAHK407-07           | JF760404                 |
| 7410              | Autochton Burns01DHJ03 | Pyrginae         | 02-SRNP-6764        | MHAHK448-07           | JF760420                 |
| 7411              | Autochton Burns01DHJ03 | Pyrginae         | 01-SRNP-2360        | MHAHK410-07           | JF760406                 |
| 7412              | Autochton Burns01DHJ03 | Pyrginae         | 01-SRNP-25357       | MHAHK451-07           | GU162122                 |
| 7413              | Autochton Burns01DHJ03 | Pyrginae         | 07-SRNP-524         | MHMXXK049-07          | JF761677                 |
| 7414              | Autochton Burns01DHJ03 | Pyrginae         | 07-SRNP-466         | MHMXXK048-07          | JF761678                 |
| 7415              | Autochton Burns01DHJ03 | Pyrginae         | 06-SRNP-34485       | MHAHJ888-07           | JF752473                 |
| 7416              | Autochton Burns01DHJ03 | Pyrginae         | 03-SRNP-9633        | MHAHK421-07           | JF760409                 |
| 7417              | Autochton Burns01DHJ03 | Pyrginae         | 06-SRNP-3321        | MHAHH508-06           | GU155206                 |
| 7418              | Autochton Burns01DHJ03 | Pyrginae         | 06-SRNP-3415        | MHAHH507-06           | GU155205                 |
| 7419              | Autochton Burns01DHJ03 | Pyrginae         | 07-SRNP-40843       | MHMXXN301-07          | JF761674                 |
| 7420              | Autochton Burns01DHJ03 | Pyrginae         | 03-SRNP-9631        | MHAHK445-07           | JF760419                 |
| 7421              | Autochton Burns01DHJ03 | Pyrginae         | 00-SRNP-1531        | MHAHK408-07           | JF760405                 |
| 7422              | Autochton Burns01DHJ03 | Pyrginae         | 03-SRNP-21535       | MHAHK429-07           | JF760413                 |
| 7423              | Autochton Burns01DHJ03 | Pyrginae         | 02-SRNP-15018       | MHAHK456-07           | JF760424                 |
| 7424              | Autochton Burns01DHJ03 | Pyrginae         | 06-SRNP-43554       | MHAHJ556-07           | JF752472                 |
| 7425              | Autochton Burns01DHJ03 | Pyrginae         | 02-SRNP-15017       | MHAHK440-07           | JF760416                 |
| 7426              | Autochton Burns01DHJ03 | Pyrginae         | 03-SRNP-8817        | MHAHK444-07           | JF760418                 |
| 7427              | Autochton Burns01DHJ03 | Pyrginae         | 01-SRNP-3734        | MHAHK406-07           | JF760403                 |
| 7428              | Autochton Burns01DHJ03 | Pyrginae         | 03-SRNP-9632        | MHAHK428-07           | JF760412                 |
| 7429              | Autochton Burns01DHJ04 | Pyrginae         | 03-SRNP-6742        | MHAHK442-07           | JF760440                 |
| 7430              | Autochton Burns01DHJ04 | Pyrginae         | 02-SRNP-17340       | MHAHK446-07           | JF760441                 |
| 7431              | Autochton Burns01DHJ04 | Pyrginae         | 07-SRNP-76          | MHMXXK046-07          | JF761680                 |
| 7432              | Autochton Burns01DHJ03 | Pyrginae         | 07-SRNP-834         | MHMXXK051-07          | JF761676                 |
| 7433              | Autochton Burns01DHJ03 | Pyrginae         | 03-SRNP-21652       | MHAHK441-07           | JF760417                 |
| 7434              | Autochton Burns01DHJ03 | Pyrginae         | 03-SRNP-9634        | MHAHK436-07           | JF760415                 |
| 7435              | Autochton Burns01DHJ03 | Pyrginae         | 03-SRNP-6163        | MHAHK427-07           | JF760411                 |
| 7436              | Autochton Burns01DHJ03 | Pyrginae         | 03-SRNP-21660       | MHAHK424-07           | JF760410                 |
| 7437              | Autochton Burns01DHJ03 | Pyrginae         | 06-SRNP-43772       | MHAHJ555-07           | JF752471                 |
| 7438              | Autochton Burns01DHJ03 | Pyrginae         | 07-SRNP-3126        | MHMXP154-08           | JF761673                 |
| 7439              | Autochton Burns01DHJ03 | Pyrginae         | 08-SRNP-1863        | MHMXW316-09           | JF753721                 |
| 7440              | Autochton Burns01DHJ03 | Pyrginae         | 08-SRNP-724         | MHMXW330-09           | JF753719                 |
| 7441              | Autochton Burns01DHJ03 | Pyrginae         | 01-SRNP-1271        | MHAHK404-07           | JF760402                 |
| 7442              | Autochton Burns01DHJ03 | Pyrginae         | 08-SRNP-723         | MHMXW335-09           | JF753720                 |
| 7443              | Autochton Burns01DHJ04 | Pyrginae         | 03-SRNP-5976        | MHAHK418-07           | JF760432                 |
| 7444              | Autochton Burns01DHJ04 | Pyrginae         | 06-SRNP-40471       | MHAHG103-06           | GU151208                 |
| 7445              | Autochton Burns01DHJ04 | Pyrginae         | 02-SRNP-5075        | MHAHK457-07           | JF760446                 |
| 7446              | Autochton Burns01DHJ05 | Pyrginae         | 07-SRNP-2033        | MHMXXN296-07          | JF761681                 |
| 7447              | Autochton Burns01DHJ04 | Pyrginae         | 02-SRNP-17338       | MHAHI307-06           | GU155829                 |

| <b>Tree Order</b> | <b>Species</b>         | <b>Subfamily</b> | <b>ACG Sampleid</b> | <b>BOLD Processid</b> | <b>Genbank Accession</b> |
|-------------------|------------------------|------------------|---------------------|-----------------------|--------------------------|
| 7448              | Autochton Burns01DHJ04 | Pyrginae         | 08-SRNP-1535        | MHMXW321-09           | JF753723                 |
| 7449              | Autochton Burns01DHJ04 | Pyrginae         | 08-SRNP-1648        | MHMXW331-09           | JF753722                 |
| 7450              | Autochton Burns01DHJ04 | Pyrginae         | 05-SRNP-4301        | MHAHF303-06           | GU150262                 |
| 7451              | Autochton Burns01DHJ04 | Pyrginae         | 05-SRNP-32030       | MHAHF301-06           | GU150260                 |
| 7452              | Autochton Burns01DHJ04 | Pyrginae         | 01-SRNP-2650        | MHAHK409-07           | JF760426                 |
| 7453              | Autochton Burns01DHJ04 | Pyrginae         | 01-SRNP-2651        | CSRII097-04           | DQ291896                 |
| 7454              | Autochton Burns01DHJ04 | Pyrginae         | 01-SRNP-2652        | CSRII098-04           | DQ291897                 |
| 7455              | Autochton Burns01DHJ04 | Pyrginae         | 02-SRNP-17339       | MHAHK447-07           | JF760442                 |
| 7456              | Autochton Burns01DHJ04 | Pyrginae         | 04-SRNP-60519       | MHAHE099-05           | GU149431                 |
| 7457              | Autochton Burns01DHJ04 | Pyrginae         | 01-SRNP-1371        | MHAHK414-07           | JF760428                 |
| 7458              | Autochton Burns01DHJ04 | Pyrginae         | 05-SRNP-43435       | MHAHF692-06           | GU150263                 |
| 7459              | Autochton Burns01DHJ04 | Pyrginae         | 03-SRNP-8819        | MHAHK423-07           | JF760433                 |
| 7460              | Autochton Burns01DHJ04 | Pyrginae         | 03-SRNP-21425       | MHAHK425-07           | JF760434                 |
| 7461              | Autochton Burns01DHJ04 | Pyrginae         | 08-SRNP-41353       | MHMXX486-09           | GU666366                 |
| 7462              | Autochton Burns01DHJ04 | Pyrginae         | 06-SRNP-43553       | MHAHJ557-07           | JF752474                 |
| 7463              | Autochton Burns01DHJ04 | Pyrginae         | 03-SRNP-9628        | MHAHK432-07           | JF760436                 |
| 7464              | Autochton Burns01DHJ04 | Pyrginae         | 07-SRNP-1157        | MHMXX050-07           | JF761679                 |
| 7465              | Autochton Burns01DHJ04 | Pyrginae         | 02-SRNP-30483       | MHAHK452-07           | JF760445                 |
| 7466              | Autochton Burns01DHJ04 | Pyrginae         | 02-SRNP-1953        | MHAHK450-07           | JF760444                 |
| 7467              | Autochton Burns01DHJ04 | Pyrginae         | 02-SRNP-3878        | MHAHK449-07           | JF760443                 |
| 7468              | Autochton Burns01DHJ04 | Pyrginae         | 02-SRNP-28933       | MHAHK439-07           | JF760439                 |
| 7469              | Autochton Burns01DHJ04 | Pyrginae         | 03-SRNP-9630        | MHAHK431-07           | JF760435                 |
| 7470              | Autochton Burns01DHJ04 | Pyrginae         | 00-SRNP-11621       | MHAHK415-07           | JF760429                 |
| 7471              | Autochton Burns01DHJ04 | Pyrginae         | 00-SRNP-12409       | MHAHK412-07           | JF760427                 |
| 7472              | Autochton Burns01DHJ04 | Pyrginae         | 01-SRNP-3899        | MHAHK402-07           | JF760425                 |
| 7473              | Autochton Burns01DHJ04 | Pyrginae         | 06-SRNP-65526       | MHAHJ684-07           | JF752475                 |
| 7474              | Autochton Burns01DHJ04 | Pyrginae         | 01-SRNP-25365       | MHAHI304-06           | GU155828                 |
| 7475              | Autochton Burns01DHJ04 | Pyrginae         | 02-SRNP-19076       | MHAHI303-06           | GU155827                 |
| 7476              | Autochton Burns01DHJ04 | Pyrginae         | 04-SRNP-3794        | MHAHD909-05           | GU161295                 |
| 7477              | Autochton Burns01DHJ04 | Pyrginae         | 02-SRNP-2648        | MHAHK438-07           | JF760438                 |
| 7478              | Autochton Burns01DHJ04 | Pyrginae         | 01-SRNP-3735        | MHAHK416-07           | JF760430                 |
| 7479              | Autochton Burns01DHJ04 | Pyrginae         | 04-SRNP-60826       | MHAHD912-05           | GU161294                 |
| 7480              | Autochton Burns01DHJ04 | Pyrginae         | 06-SRNP-65122       | MHAHJ887-07           | JF752476                 |
| 7481              | Autochton Burns01DHJ04 | Pyrginae         | 06-SRNP-34487       | MHAHJ889-07           | JF752477                 |
| 7482              | Autochton Burns01DHJ04 | Pyrginae         | 05-SRNP-21742       | MHAHF304-06           | GU150261                 |
| 7483              | Autochton Burns01DHJ04 | Pyrginae         | 03-SRNP-21668       | CSRII101-04           | DQ291899                 |
| 7484              | Autochton Burns01DHJ04 | Pyrginae         | 03-SRNP-9627        | CSRII103-04           | DQ291901                 |
| 7485              | Autochton Burns01DHJ04 | Pyrginae         | 03-SRNP-9626        | MHAHK433-07           | JF760437                 |
| 7486              | Autochton Burns01DHJ04 | Pyrginae         | 02-SRNP-19077       | MHAHK458-07           | JF760447                 |
| 7487              | Autochton Burns01DHJ04 | Pyrginae         | 08-SRNP-5469        | MHMXY1083-09          | GU666456                 |
| 7488              | Autochton Burns01DHJ05 | Pyrginae         | 00-SRNP-11187       | CSRII096-04           | DQ291895                 |
| 7489              | Autochton Burns01DHJ05 | Pyrginae         | 06-SRNP-2060        | MHAHG631-06           | GU151207                 |
| 7490              | Autochton Burns01DHJ05 | Pyrginae         | 01-SRNP-3733        | MHAHK403-07           | JF760448                 |
| 7491              | Autochton Burns01DHJ05 | Pyrginae         | 03-SRNP-9837        | CSRII104-04           | DQ291902                 |
| 7492              | Autochton Burns01DHJ05 | Pyrginae         | 03-SRNP-21655       | MHAHK435-07           | JF760452                 |
| 7493              | Autochton Burns01DHJ05 | Pyrginae         | 03-SRNP-31321       | CSRII102-04           | DQ291900                 |
| 7494              | Autochton Burns01DHJ05 | Pyrginae         | 06-SRNP-9700        | MHAHJ784-07           | JF752478                 |
| 7495              | Autochton Burns01DHJ05 | Pyrginae         | 03-SRNP-13047.1     | MHAHK420-07           | JF760451                 |
| 7496              | Autochton Burns01DHJ05 | Pyrginae         | 03-SRNP-10151       | CSRII099-04           | DQ291898                 |
| 7497              | Autochton Burns01DHJ05 | Pyrginae         | 04-SRNP-22708       | MHAHD910-05           | GU161292                 |
| 7498              | Autochton Burns01DHJ05 | Pyrginae         | 04-SRNP-22710       | MHAHD911-05           | GU161293                 |
| 7499              | Autochton Burns01DHJ05 | Pyrginae         | 02-SRNP-14078       | MHAHI308-06           | GU155830                 |
| 7500              | Autochton Burns01DHJ05 | Pyrginae         | 01-SRNP-3736        | MHAHK405-07           | JF760449                 |
| 7501              | Autochton Burns01DHJ05 | Pyrginae         | 01-SRNP-1893        | MHAHK413-07           | JF760450                 |
| 7502              | Autochton Burns01DHJ05 | Pyrginae         | 08-SRNP-1358        | MHMXW319-09           | JF753724                 |
| 7503              | Autochton Burns01DHJ05 | Pyrginae         | 08-SRNP-6305        | MHMXY1084-09          | GU666457                 |

| <b>Tree Order</b> | <b>Species</b>   | <b>Subfamily</b> | <b>ACG Sampleid</b> | <b>BOLD Processid</b> | <b>Genbank Accession</b> |
|-------------------|------------------|------------------|---------------------|-----------------------|--------------------------|
| 7504              | Cabares potrillo | Pyrginae         | 09-SRNP-57001       | MHMYH186-10           | HM887333                 |
| 7505              | Cabares potrillo | Pyrginae         | 06-SRNP-58154       | MHAHJ833-07           | JF752493                 |
| 7506              | Cabares potrillo | Pyrginae         | 95-SRNP-6015        | CSCR049-04            | DQ291952                 |
| 7507              | Cabares potrillo | Pyrginae         | 09-SRNP-57000       | MHMYH184-10           | HM887331                 |
| 7508              | Cabares potrillo | Pyrginae         | 09-SRNP-57002       | MHMYH185-10           | HM887332                 |
| 7509              | Cabares potrillo | Pyrginae         | 09-SRNP-57090       | MHMYG2497-10          | HM885925                 |
| 7510              | Mysoria ambigua  | Pyrginae         | 03-SRNP-1431        | CSCR380-04            | DQ292659                 |
| 7511              | Mysoria ambigua  | Pyrginae         | 08-SRNP-24392       | MHMYB120-09           | GU649703                 |
| 7512              | Mysoria ambigua  | Pyrginae         | 08-SRNP-55431       | MHMXW083-09           | JF753985                 |
| 7513              | Mysoria ambigua  | Pyrginae         | 05-SRNP-57606       | MHAHL028-07           | JF762374                 |
| 7514              | Mysoria ambigua  | Pyrginae         | 05-SRNP-55647       | MHAHL027-07           | JF762373                 |
| 7515              | Mysoria ambigua  | Pyrginae         | 04-SRNP-23872       | MHAHD833-05           | GU161677                 |
| 7516              | Mysoria ambigua  | Pyrginae         | 04-SRNP-14802       | MHAHD832-05           | GU161676                 |
| 7517              | Mysoria ambigua  | Pyrginae         | 04-SRNP-14797       | MHAHD831-05           | GU161674                 |
| 7518              | Mysoria ambigua  | Pyrginae         | 04-SRNP-14796       | MHAHD830-05           | GU161672                 |
| 7519              | Mysoria ambigua  | Pyrginae         | 04-SRNP-14795       | MHAHD829-05           | GU161675                 |
| 7520              | Mysoria ambigua  | Pyrginae         | 04-SRNP-14800       | MHAHC716-05           | DQ292665                 |
| 7521              | Mysoria ambigua  | Pyrginae         | 04-SRNP-14801       | MHAHC715-05           | DQ292664                 |
| 7522              | Mysoria ambigua  | Pyrginae         | 05-SRNP-55178       | MHAHC713-05           | DQ292662                 |
| 7523              | Mysoria ambigua  | Pyrginae         | 04-SRNP-14558       | MHAHC711-05           | DQ292660                 |
| 7524              | Mysoria ambigua  | Pyrginae         | 04-SRNP-14099       | MHAHC712-05           | DQ292661                 |
| 7525              | Mysoria ambigua  | Pyrginae         | 05-SRNP-55193       | MHAHC714-05           | DQ292663                 |
| 7526              | Mysoria ambigua  | Pyrginae         | 05-SRNP-55175       | MHAHL029-07           | JF762375                 |
| 7527              | Mysoria ambigua  | Pyrginae         | 08-SRNP-55530       | MHMXW084-09           | JF753986                 |
| 7528              | Mysoria ambigua  | Pyrginae         | 03-SRNP-1293        | CSCR379-04            | DQ292658                 |
| 7529              | Mysoria ambigua  | Pyrginae         | 04-SRNP-14584       | MHAHD828-05           | GU161673                 |
| 7530              | Mysoria ambigua  | Pyrginae         | 08-SRNP-24269       | MHMYB122-09           | GU649697                 |
| 7531              | Jemadia Burns01  | Pyrginae         | 01-SRNP-9029        | CSCR118-04            | DQ292569                 |
| 7532              | Jemadia Burns01  | Pyrginae         | 04-SRNP-30754       | MHAHC145-05           | DQ292573                 |
| 7533              | Jemadia Burns01  | Pyrginae         | 03-SRNP-21823       | MHAHC153-05           | DQ292574                 |
| 7534              | Jemadia Burns01  | Pyrginae         | 03-SRNP-21528       | MHAHC161-05           | DQ292575                 |
| 7535              | Jemadia Burns01  | Pyrginae         | 04-SRNP-32358       | MHAHD741-05           | GU161555                 |
| 7536              | Jemadia Burns01  | Pyrginae         | 04-SRNP-34396       | MHAHD742-05           | GU161554                 |
| 7537              | Jemadia Burns01  | Pyrginae         | 05-SRNP-31969       | MHAHG484-06           | GU151442                 |
| 7538              | Jemadia Burns01  | Pyrginae         | 00-SRNP-4482        | CSRII253-04           | DQ292571                 |
| 7539              | Jemadia Burns01  | Pyrginae         | 04-SRNP-56811       | MHAHF455-06           | GU150503                 |
| 7540              | Jemadia Burns01  | Pyrginae         | 05-SRNP-31086       | MHAHF454-06           | GU150502                 |
| 7541              | Jemadia Burns01  | Pyrginae         | 96-SRNP-12846       | CSRII254-04           | DQ292572                 |
| 7542              | Jemadia Burns01  | Pyrginae         | 02-SRNP-13059       | CSCR119-04            | DQ292570                 |
| 7543              | Jemadia Burns01  | Pyrginae         | 09-SRNP-30034       | MHMYC450-09           | GU649882                 |
| 7544              | Elbella scylla   | Pyrginae         | 04-SRNP-13405       | MHAHD819-05           | GU161469                 |
| 7545              | Elbella scylla   | Pyrginae         | 07-SRNP-32122       | MHMXO770-08           | JF762170                 |
| 7546              | Elbella scylla   | Pyrginae         | 07-SRNP-65187       | MHMXR813-08           | JF762167                 |
| 7547              | Elbella scylla   | Pyrginae         | 08-SRNP-70068       | MHMXW075-09           | JF753883                 |
| 7548              | Elbella scylla   | Pyrginae         | 08-SRNP-70229       | MHMXW076-09           | JF753884                 |
| 7549              | Elbella scylla   | Pyrginae         | 05-SRNP-31078       | MHAHF135-06           | GU150398                 |
| 7550              | Elbella scylla   | Pyrginae         | 05-SRNP-12075       | MHAHF452-06           | GU150396                 |
| 7551              | Elbella scylla   | Pyrginae         | 05-SRNP-31568       | MHAHF453-06           | GU150397                 |
| 7552              | Elbella scylla   | Pyrginae         | 08-SRNP-72172       | MHMXX667-09           | JF777898                 |
| 7553              | Elbella scylla   | Pyrginae         | 08-SRNP-70307       | MHMXW072-09           | JF753881                 |
| 7554              | Elbella scylla   | Pyrginae         | 08-SRNP-55460       | MHMXW071-09           | JF753880                 |
| 7555              | Elbella scylla   | Pyrginae         | 08-SRNP-55401       | MHMXW070-09           | JF753879                 |
| 7556              | Elbella scylla   | Pyrginae         | 08-SRNP-55397       | MHMXW069-09           | JF753878                 |
| 7557              | Elbella scylla   | Pyrginae         | 08-SRNP-70314       | MHMXW068-09           | JF753877                 |
| 7558              | Elbella scylla   | Pyrginae         | 06-SRNP-67774       | MHMXH895-07           | JF760666                 |
| 7559              | Elbella scylla   | Pyrginae         | 05-SRNP-31077       | MHAHF451-06           | GU150395                 |

| <b>Tree Order</b> | <b>Species</b>         | <b>Subfamily</b> | <b>ACG Sampleid</b> | <b>BOLD Processid</b> | <b>Genbank Accession</b> |
|-------------------|------------------------|------------------|---------------------|-----------------------|--------------------------|
| 7560              | Elbella scylla         | Pyrginae         | 05-SRNP-55736       | MHAHF136-06           | GU150400                 |
| 7561              | Elbella scylla         | Pyrginae         | 05-SRNP-13170       | MHAHF134-06           | GU150399                 |
| 7562              | Elbella scylla         | Pyrginae         | 04-SRNP-13706       | MHAHD822-05           | GU161472                 |
| 7563              | Elbella scylla         | Pyrginae         | 04-SRNP-13406       | MHAHD821-05           | GU161468                 |
| 7564              | Elbella scylla         | Pyrginae         | 04-SRNP-13082       | MHAHD820-05           | GU161470                 |
| 7565              | Elbella scylla         | Pyrginae         | 04-SRNP-13081       | MHAHD818-05           | GU161471                 |
| 7566              | Elbella scylla         | Pyrginae         | 04-SRNP-21136       | MHAHC137-05           | DQ292385                 |
| 7567              | Elbella scylla         | Pyrginae         | 07-SRNP-21861       | MHMXR811-08           | JF762168                 |
| 7568              | Elbella scylla         | Pyrginae         | 07-SRNP-57964       | MHMXR810-08           | JF762169                 |
| 7569              | Elbella scylla         | Pyrginae         | 03-SRNP-232         | CSCR361-04            | DQ292383                 |
| 7570              | Elbella scylla         | Pyrginae         | 07-SRNP-65934       | MHMXT083-08           | JF762166                 |
| 7571              | Elbella scylla         | Pyrginae         | 08-SRNP-70185       | MHMWX073-09           | JF753882                 |
| 7572              | Elbella scylla         | Pyrginae         | 03-SRNP-635         | CSCR362-04            | DQ292384                 |
| 7573              | Elbella scylla         | Pyrginae         | 08-SRNP-23853       | MHMYB121-09           | GU649696                 |
| 7574              | Elbella patrobas       | Pyrginae         | 07-SRNP-31402       | MHAHL418-07           | JF762162                 |
| 7575              | Elbella patrobas       | Pyrginae         | 06-SRNP-33024       | MHAHJ791-07           | JF752763                 |
| 7576              | Elbella patrobas       | Pyrginae         | 03-SRNP-6393        | CSCR508-04            | DQ292382                 |
| 7577              | Elbella patrobas       | Pyrginae         | 07-SRNP-2792        | MHMXX0756-08          | JF762164                 |
| 7578              | Elbella patrobas       | Pyrginae         | 07-SRNP-4287        | MHMXR633-08           | JF762163                 |
| 7579              | Elbella patrobas       | Pyrginae         | 08-SRNP-2588        | MHMWX007-09           | JF753876                 |
| 7580              | Elbella patrobasDHJ05  | Pyrginae         | 07-SRNP-3722        | MHMXX0760-08          | JF762165                 |
| 7581              | Elbella merops         | Pyrginae         | 05-SRNP-32782       | MHAHG483-06           | GU151398                 |
| 7582              | Elbella merops         | Pyrginae         | 08-SRNP-70940       | MHMXX662-09           | JF777897                 |
| 7583              | Elbella merops         | Pyrginae         | 05-SRNP-41519       | MHAHF450-06           | GU150394                 |
| 7584              | Elbella merops         | Pyrginae         | 09-SRNP-30538       | MHMYC451-09           | GU649883                 |
| 7585              | Elbella merops         | Pyrginae         | 09-SRNP-71893       | MHMYE1438-09          | GU653558                 |
| 7586              | Jemadia pseudognetus   | Pyrginae         | 01-SRNP-1773        | CSCR116-04            | DQ292576                 |
| 7587              | Jemadia pseudognetus   | Pyrginae         | 02-SRNP-3211        | CSRII250-04           | DQ292579                 |
| 7588              | Jemadia pseudognetus   | Pyrginae         | 08-SRNP-4381        | MHMWX010-09           | JF753963                 |
| 7589              | Jemadia pseudognetus   | Pyrginae         | 08-SRNP-639         | MHMXT065-08           | JF762297                 |
| 7590              | Jemadia pseudognetus   | Pyrginae         | 07-SRNP-65061       | MHMXR634-08           | JF762299                 |
| 7591              | Jemadia pseudognetus   | Pyrginae         | 07-SRNP-45220       | MHMXX0753-08          | JF762300                 |
| 7592              | Jemadia pseudognetus   | Pyrginae         | 07-SRNP-2561        | MHMXX0751-08          | JF762302                 |
| 7593              | Jemadia pseudognetus   | Pyrginae         | 07-SRNP-1947        | MHMXX0750-08          | JF762303                 |
| 7594              | Jemadia pseudognetus   | Pyrginae         | 07-SRNP-2837        | MHMXX0749-08          | JF762304                 |
| 7595              | Jemadia pseudognetus   | Pyrginae         | 07-SRNP-3517        | MHMXX0742-08          | JF762305                 |
| 7596              | Jemadia pseudognetus   | Pyrginae         | 05-SRNP-7825        | MHAHG682-06           | GU151443                 |
| 7597              | Jemadia pseudognetus   | Pyrginae         | 05-SRNP-4394        | MHAHF463-06           | GU150509                 |
| 7598              | Jemadia pseudognetus   | Pyrginae         | 05-SRNP-2922        | MHAHF462-06           | GU150508                 |
| 7599              | Jemadia pseudognetus   | Pyrginae         | 05-SRNP-3192        | MHAHF461-06           | GU150504                 |
| 7600              | Jemadia pseudognetus   | Pyrginae         | 05-SRNP-4069        | MHAHF460-06           | GU150505                 |
| 7601              | Jemadia pseudognetus   | Pyrginae         | 04-SRNP-4113        | MHAHD737-05           | GU161556                 |
| 7602              | Jemadia pseudognetus   | Pyrginae         | 06-SRNP-1088        | MHAHG337-06           | GU151444                 |
| 7603              | Jemadia pseudognetus   | Pyrginae         | 05-SRNP-4395        | MHAHF458-06           | GU150506                 |
| 7604              | Jemadia pseudognetus   | Pyrginae         | 02-SRNP-18659       | CSRII251-04           | DQ292580                 |
| 7605              | Jemadia pseudognetus   | Pyrginae         | 02-SRNP-18802       | CSRII252-04           | DQ292581                 |
| 7606              | Jemadia pseudognetus   | Pyrginae         | 04-SRNP-26478       | MHAHF459-06           | GU150507                 |
| 7607              | Jemadia pseudognetus   | Pyrginae         | 06-SRNP-67850       | MHMXX01035-08         | JF762306                 |
| 7608              | Jemadia pseudognetus   | Pyrginae         | 07-SRNP-2602        | MHMXX0752-08          | JF762301                 |
| 7609              | Jemadia pseudognetus   | Pyrginae         | 08-SRNP-289         | MHMXT064-08           | JF762298                 |
| 7610              | Jemadia pseudognetus   | Pyrginae         | 01-SRNP-2420        | CSCR117-04            | DQ292577                 |
| 7611              | Jemadia pseudognetus   | Pyrginae         | 02-SRNP-1552        | CSRII249-04           | DQ292578                 |
| 7612              | Jemadia pseudognetus   | Pyrginae         | 08-SRNP-65423       | MHMXXY1126-09         | GU666418                 |
| 7613              | Parelbella macleannani | Pyrginae         | 06-SRNP-8158        | MHAHJ910-07           | JF752970                 |
| 7614              | Parelbella macleannani | Pyrginae         | 04-SRNP-24065       | MHAHD743-05           | GU161761                 |
| 7615              | Parelbella macleannani | Pyrginae         | 04-SRNP-23689       | MHAHD748-05           | GU161764                 |



| <b>Tree Order</b> | <b>Species</b>         | <b>Subfamily</b> | <b>ACG Sampleid</b> | <b>BOLD Processid</b> | <b>Genbank Accession</b> |
|-------------------|------------------------|------------------|---------------------|-----------------------|--------------------------|
| 7616              | Parelbella macleannani | Pyrginae         | 04-SRNP-21620       | MHAHD745-05           | GU161760                 |
| 7617              | Parelbella macleannani | Pyrginae         | 04-SRNP-23317       | MHAHD744-05           | GU161762                 |
| 7618              | Parelbella macleannani | Pyrginae         | 04-SRNP-23795       | MHAHD747-05           | GU161765                 |
| 7619              | Parelbella macleannani | Pyrginae         | 04-SRNP-23300       | MHAHD746-05           | GU161763                 |
| 7620              | Parelbella macleannani | Pyrginae         | 01-SRNP-163         | CSRII546-04           | DQ292831                 |
| 7621              | Parelbella macleannani | Pyrginae         | 00-SRNP-571         | CSRII545-04           | DQ292830                 |
| 7622              | Parelbella macleannani | Pyrginae         | 07-SRNP-19          | MHMXXK147-07          | JF762521                 |
| 7623              | Parelbella macleannani | Pyrginae         | 07-SRNP-425         | MHMXXK155-07          | JF762520                 |
| 7624              | Parelbella macleannani | Pyrginae         | 07-SRNP-20933       | MHAHL416-07           | JF762513                 |
| 7625              | Parelbella macleannani | Pyrginae         | 06-SRNP-23440       | MHAHL417-07           | JF762514                 |
| 7626              | Parelbella macleannani | Pyrginae         | 07-SRNP-2509        | MHMXXO744-08          | JF762519                 |
| 7627              | Parelbella macleannani | Pyrginae         | 07-SRNP-3362        | MHMXXO745-08          | JF762518                 |
| 7628              | Parelbella macleannani | Pyrginae         | 07-SRNP-2510        | MHMXXO746-08          | JF762517                 |
| 7629              | Parelbella macleannani | Pyrginae         | 07-SRNP-23463       | MHMXR636-08           | JF762516                 |
| 7630              | Parelbella macleannani | Pyrginae         | 07-SRNP-22879       | MHMXR637-08           | JF762515                 |
| 7631              | Parelbella macleannani | Pyrginae         | 09-SRNP-20914       | MHMYH111-10           | HM887263                 |
| 7632              | Yanguna cosyra         | Pyrginae         | 03-SRNP-5253        | CSCR457-04            | DQ293932                 |
| 7633              | Yanguna cosyra         | Pyrginae         | 03-SRNP-3068        | CSCR458-04            | DQ293933                 |
| 7634              | Yanguna cosyra         | Pyrginae         | 04-SRNP-35097       | MHAHC106-05           | DQ293934                 |
| 7635              | Yanguna cosyra         | Pyrginae         | 04-SRNP-35058       | MHAHC114-05           | DQ293935                 |
| 7636              | Yanguna cosyra         | Pyrginae         | 04-SRNP-35285       | MHAHC122-05           | DQ293936                 |
| 7637              | Yanguna cosyra         | Pyrginae         | 04-SRNP-35120       | MHAHC130-05           | DQ293937                 |
| 7638              | Yanguna cosyra         | Pyrginae         | 04-SRNP-35115       | MHAHC138-05           | DQ293938                 |
| 7639              | Yanguna cosyra         | Pyrginae         | 04-SRNP-35110       | MHAHC146-05           | DQ293939                 |
| 7640              | Yanguna cosyra         | Pyrginae         | 04-SRNP-35116       | MHAHC154-05           | DQ293940                 |
| 7641              | Yanguna cosyra         | Pyrginae         | 04-SRNP-35122       | MHAHC162-05           | DQ293941                 |
| 7642              | Yanguna cosyra         | Pyrginae         | 05-SRNP-35027       | MHAHL008-07           | JF763512                 |
| 7643              | Yanguna cosyra         | Pyrginae         | 05-SRNP-35042       | MHAHL009-07           | JF763513                 |
| 7644              | Yanguna cosyra         | Pyrginae         | 05-SRNP-35054       | MHAHL010-07           | JF763514                 |
| 7645              | Yanguna cosyra         | Pyrginae         | 06-SRNP-65100       | MHAHL431-07           | JF763515                 |
| 7646              | Yanguna cosyra         | Pyrginae         | 07-SRNP-41792       | MHMXXO761-08          | JF763522                 |
| 7647              | Yanguna cosyra         | Pyrginae         | 07-SRNP-2192        | MHMXXO762-08          | JF763521                 |
| 7648              | Yanguna cosyra         | Pyrginae         | 07-SRNP-2272        | MHMXXO763-08          | JF763520                 |
| 7649              | Yanguna cosyra         | Pyrginae         | 07-SRNP-41479       | MHMXXO764-08          | JF763519                 |
| 7650              | Yanguna cosyra         | Pyrginae         | 07-SRNP-41979       | MHMXXO765-08          | JF763518                 |
| 7651              | Yanguna cosyra         | Pyrginae         | 07-SRNP-36506       | MHMXR806-08           | JF763517                 |
| 7652              | Yanguna cosyra         | Pyrginae         | 07-SRNP-35955       | MHMXR807-08           | JF763516                 |
| 7653              | Yanguna cosyra         | Pyrginae         | 08-SRNP-35914       | MHMXX668-09           | JF778646                 |
| 7654              | Yanguna cosyra         | Pyrginae         | 08-SRNP-31712       | MHMXY1120-09          | GU666420                 |
| 7655              | Jonaspyge aesculapus   | Pyrginae         | 03-SRNP-3336        | MHAHE105-05           | GU149691                 |
| 7656              | Jonaspyge aesculapus   | Pyrginae         | 04-SRNP-35065       | MHAHC152-05           | DQ292603                 |
| 7657              | Jonaspyge aesculapus   | Pyrginae         | 98-SRNP-2286        | MHAHK573-07           | JF760830                 |
| 7658              | Jonaspyge aesculapus   | Pyrginae         | 98-SRNP-2048.1      | MHAHK575-07           | JF760832                 |
| 7659              | Jonaspyge aesculapus   | Pyrginae         | 97-SRNP-514         | CSCR120-04            | DQ292599                 |
| 7660              | Jonaspyge aesculapus   | Pyrginae         | 04-SRNP-35064       | CSRII215-04           | DQ292601                 |
| 7661              | Jonaspyge aesculapus   | Pyrginae         | 04-SRNP-35130       | MHAHC144-05           | DQ292602                 |
| 7662              | Jonaspyge aesculapus   | Pyrginae         | 05-SRNP-35055       | MHAHF151-06           | GU150510                 |
| 7663              | Jonaspyge aesculapus   | Pyrginae         | 02-SRNP-23111       | CSCR121-04            | DQ292600                 |
| 7664              | Jonaspyge aesculapus   | Pyrginae         | 04-SRNP-35066       | MHAHC160-05           | DQ292604                 |
| 7665              | Jonaspyge aesculapus   | Pyrginae         | 97-SRNP-2105        | MHAHK574-07           | JF760831                 |
| 7666              | Jonaspyge aesculapus   | Pyrginae         | 00-SRNP-9360        | MHAHK576-07           | JF760833                 |
| 7667              | Creonpyge creon        | Pyrginae         | 06-SRNP-36175       | MHMXXK158-07          | JF762001                 |
| 7668              | Creonpyge creon        | Pyrginae         | 02-SRNP-8028        | MHAHK583-07           | JF760631                 |
| 7669              | Creonpyge creon        | Pyrginae         | 01-SRNP-7147        | MHAHK580-07           | JF760629                 |
| 7670              | Creonpyge creon        | Pyrginae         | 01-SRNP-7399        | MHAHK579-07           | JF760628                 |
| 7671              | Creonpyge creon        | Pyrginae         | 02-SRNP-9441        | MHAHK577-07           | JF760626                 |

| Tree Order | Species                   | Subfamily | ACG Sampleid  | BOLD Processid | Genbank Accession |
|------------|---------------------------|-----------|---------------|----------------|-------------------|
| 7672       | Creonopyge creon          | Pyrginae  | 03-SRNP-3109  | MHAHE106-05    | GU149566          |
| 7673       | Creonopyge creon          | Pyrginae  | 98-SRNP-2317  | MHAHK578-07    | JF760627          |
| 7674       | Creonopyge creon          | Pyrginae  | 03-SRNP-3108  | CSCR355-04     | DQ292226          |
| 7675       | Creonopyge creon          | Pyrginae  | 02-SRNP-8026  | MHAHK582-07    | JF760630          |
| 7676       | Creonopyge creon          | Pyrginae  | 06-SRNP-36176 | MHAHL430-07    | JF762000          |
| 7677       | Melanopyge erythrosticta  | Pyrginae  | 03-SRNP-5457  | CSCR370-04     | DQ292612          |
| 7678       | Melanopyge erythrosticta  | Pyrginae  | 00-SRNP-15831 | CSCR123-04     | DQ292611          |
| 7679       | Melanopyge erythrosticta  | Pyrginae  | 04-SRNP-34289 | MHAHD728-05    | GU161575          |
| 7680       | Melanopyge erythrosticta  | Pyrginae  | 05-SRNP-894   | MHAHF149-06    | GU150524          |
| 7681       | Melanopyge Burns01        | Pyrginae  | 07-SRNP-992   | MHMXX142-07    | JF762329          |
| 7682       | Melanopyge Burns01        | Pyrginae  | 09-SRNP-722   | MHMYC453-09    | GU649885          |
| 7683       | Melanopyge Burns01        | Pyrginae  | 05-SRNP-34170 | MHAHG189-06    | GU151453          |
| 7684       | Melanopyge Burns01        | Pyrginae  | 07-SRNP-2732  | MHMXX0767-08   | JF762327          |
| 7685       | Melanopyge Burns01        | Pyrginae  | 05-SRNP-3132  | MHAHF148-06    | GU150523          |
| 7686       | Melanopyge Burns01        | Pyrginae  | 05-SRNP-309   | MHAHF147-06    | GU150522          |
| 7687       | Melanopyge Burns01        | Pyrginae  | 04-SRNP-3561  | MHAHD731-05    | GU161574          |
| 7688       | Melanopyge Burns01        | Pyrginae  | 04-SRNP-3562  | MHAHD730-05    | GU161572          |
| 7689       | Melanopyge Burns01        | Pyrginae  | 04-SRNP-4008  | MHAHD729-05    | GU161573          |
| 7690       | Melanopyge Burns01        | Pyrginae  | 04-SRNP-3996  | MHAHD727-05    | GU161571          |
| 7691       | Melanopyge Burns01        | Pyrginae  | 04-SRNP-3563  | MHAHC720-05    | DQ292610          |
| 7692       | Melanopyge Burns01        | Pyrginae  | 07-SRNP-65400 | MHMXX0766-08   | JF762328          |
| 7693       | Melanopyge Burns01        | Pyrginae  | 02-SRNP-14905 | CSCR122-04     | DQ292609          |
| 7694       | Melanopyge Burns01        | Pyrginae  | 05-SRNP-34206 | MHAHG188-06    | GU151454          |
| 7695       | Melanopyge Burns01        | Pyrginae  | 08-SRNP-71628 | MHMXX959-09    | JF778067          |
| 7696       | Melanopyge Burns01        | Pyrginae  | 09-SRNP-65504 | MHMYC454-09    | GU649878          |
| 7697       | Pyrrhopyge zenodorusDHJ01 | Pyrginae  | 04-SRNP-41678 | MHAHD823-05    | GU161799          |
| 7698       | Pyrrhopyge zenodorusDHJ01 | Pyrginae  | 00-SRNP-1645  | MHAHH091-06    | GU155464          |
| 7699       | Pyrrhopyge zenodorusDHJ01 | Pyrginae  | 01-SRNP-9155  | MHAHH098-06    | GU155466          |
| 7700       | Pyrrhopyge zenodorusDHJ01 | Pyrginae  | 06-SRNP-1697  | MHAHH431-06    | GU155467          |
| 7701       | Pyrrhopyge zenodorusDHJ01 | Pyrginae  | 06-SRNP-42909 | MHAHI515-06    | GU156286          |
| 7702       | Pyrrhopyge zenodorusDHJ01 | Pyrginae  | 06-SRNP-4369  | MHAHJ649-07    | JF753096          |
| 7703       | Pyrrhopyge zenodorusDHJ03 | Pyrginae  | 05-SRNP-59692 | MHAHF168-06    | GU150736          |
| 7704       | Pyrrhopyge zenodorusDHJ03 | Pyrginae  | 06-SRNP-60372 | MHMXX146-07    | JF762731          |
| 7705       | Pyrrhopyge zenodorusDHJ03 | Pyrginae  | 05-SRNP-66260 | MHAHG180-06    | GU151590          |
| 7706       | Pyrrhopyge zenodorusDHJ03 | Pyrginae  | 05-SRNP-66171 | MHAHG181-06    | GU151589          |
| 7707       | Pyrrhopyge zenodorusDHJ03 | Pyrginae  | 99-SRNP-5161  | MHAHH105-06    | GU155465          |
| 7708       | Pyrrhopyge zenodorusDHJ03 | Pyrginae  | 07-SRNP-3197  | MHMXX0772-08   | JF762730          |
| 7709       | Pyrrhopyge zenodorusDHJ03 | Pyrginae  | 08-SRNP-70278 | MHMXXW086-09   | JF754120          |
| 7710       | Pyrrhopyge zenodorusDHJ03 | Pyrginae  | 08-SRNP-70280 | MHMXXW088-09   | JF754121          |
| 7711       | Pyrrhopyge zenodorusDHJ02 | Pyrginae  | 08-SRNP-72317 | MHMXY1121-09   | HM893816          |
| 7712       | Pyrrhopyge zenodorusDHJ02 | Pyrginae  | 00-SRNP-20566 | MHAHH095-06    | GU155468          |
| 7713       | Pyrrhopyge zenodorusDHJ02 | Pyrginae  | 07-SRNP-65619 | MHMXR812-08    | JF762725          |
| 7714       | Pyrrhopyge zenodorusDHJ02 | Pyrginae  | 07-SRNP-45223 | MHMXX0771-08   | JF762727          |
| 7715       | Pyrrhopyge zenodorusDHJ02 | Pyrginae  | 06-SRNP-9502  | MHMXX144-07    | JF762729          |
| 7716       | Pyrrhopyge zenodorusDHJ02 | Pyrginae  | 06-SRNP-46215 | MHAHJ650-07    | JF753099          |
| 7717       | Pyrrhopyge zenodorusDHJ02 | Pyrginae  | 06-SRNP-6822  | MHAHJ648-07    | JF753098          |
| 7718       | Pyrrhopyge zenodorusDHJ02 | Pyrginae  | 06-SRNP-7823  | MHAHJ515-07    | JF753097          |
| 7719       | Pyrrhopyge zenodorusDHJ02 | Pyrginae  | 06-SRNP-20133 | MHAHH432-06    | GU155484          |
| 7720       | Pyrrhopyge zenodorusDHJ02 | Pyrginae  | 99-SRNP-12050 | MHAHH104-06    | GU155479          |
| 7721       | Pyrrhopyge zenodorusDHJ02 | Pyrginae  | 99-SRNP-5532  | MHAHH103-06    | GU155482          |
| 7722       | Pyrrhopyge zenodorusDHJ02 | Pyrginae  | 02-SRNP-14950 | MHAHH102-06    | GU155483          |
| 7723       | Pyrrhopyge zenodorusDHJ02 | Pyrginae  | 01-SRNP-1501  | MHAHH101-06    | GU155477          |
| 7724       | Pyrrhopyge zenodorusDHJ02 | Pyrginae  | 00-SRNP-14177 | MHAHH100-06    | GU155478          |
| 7725       | Pyrrhopyge zenodorusDHJ02 | Pyrginae  | 00-SRNP-2007  | MHAHH097-06    | GU155481          |
| 7726       | Pyrrhopyge zenodorusDHJ02 | Pyrginae  | 00-SRNP-22185 | MHAHH094-06    | GU155469          |
| 7727       | Pyrrhopyge zenodorusDHJ02 | Pyrginae  | 00-SRNP-14143 | MHAHH093-06    | GU155470          |

| Tree Order | Species                   | Subfamily | ACG Sampleid  | BOLD Processid | Genbank Accession |
|------------|---------------------------|-----------|---------------|----------------|-------------------|
| 7728       | Pyrrhopyge zenodorusDHJ02 | Pyrginae  | 00-SRNP-11309 | MHAHH092-06    | GU155471          |
| 7729       | Pyrrhopyge zenodorusDHJ02 | Pyrginae  | 00-SRNP-2010  | MHAHH090-06    | GU155475          |
| 7730       | Pyrrhopyge zenodorusDHJ02 | Pyrginae  | 02-SRNP-23595 | MHAHH089-06    | GU155472          |
| 7731       | Pyrrhopyge zenodorusDHJ02 | Pyrginae  | 02-SRNP-14179 | MHAHH088-06    | GU155474          |
| 7732       | Pyrrhopyge zenodorusDHJ02 | Pyrginae  | 01-SRNP-4744  | MHAHH087-06    | GU155473          |
| 7733       | Pyrrhopyge zenodorusDHJ02 | Pyrginae  | 03-SRNP-1421  | MHAHH086-06    | GU155485          |
| 7734       | Pyrrhopyge zenodorusDHJ02 | Pyrginae  | 05-SRNP-49652 | MHAHG698-06    | GU151592          |
| 7735       | Pyrrhopyge zenodorusDHJ02 | Pyrginae  | 06-SRNP-116   | MHAHG697-06    | GU151591          |
| 7736       | Pyrrhopyge zenodorusDHJ02 | Pyrginae  | 05-SRNP-59691 | MHAHF169-06    | GU150737          |
| 7737       | Pyrrhopyge zenodorusDHJ02 | Pyrginae  | 04-SRNP-47942 | MHAHD827-05    | GU161800          |
| 7738       | Pyrrhopyge zenodorusDHJ02 | Pyrginae  | 04-SRNP-47938 | MHAHD826-05    | GU161803          |
| 7739       | Pyrrhopyge zenodorusDHJ02 | Pyrginae  | 04-SRNP-48199 | MHAHD825-05    | GU161802          |
| 7740       | Pyrrhopyge zenodorusDHJ02 | Pyrginae  | 04-SRNP-47940 | MHAHD824-05    | GU161801          |
| 7741       | Pyrrhopyge zenodorusDHJ02 | Pyrginae  | 02-SRNP-15035 | MHAHH099-06    | GU155476          |
| 7742       | Pyrrhopyge zenodorusDHJ02 | Pyrginae  | 07-SRNP-45520 | MHM XO768-08   | JF762728          |
| 7743       | Pyrrhopyge zenodorusDHJ02 | Pyrginae  | 07-SRNP-45519 | MHM XO773-08   | JF762726          |
| 7744       | Pyrrhopyge zenodorusDHJ02 | Pyrginae  | 06-SRNP-65140 | MHAHJ816-07    | JF753100          |
| 7745       | Pyrrhopyge zenodorusDHJ02 | Pyrginae  | 03-SRNP-1418  | CSCR402-04     | DQ293154          |
| 7746       | Pyrrhopyge zenodorusDHJ02 | Pyrginae  | 03-SRNP-5466  | CSCR403-04     | DQ293155          |
| 7747       | Pyrrhopyge zenodorusDHJ02 | Pyrginae  | 00-SRNP-14681 | MHAHH096-06    | GU155480          |
| 7748       | Pyrrhopyge zenodorusDHJ02 | Pyrginae  | 06-SRNP-44426 | MHAHK212-07    | JF761080          |
| 7749       | Pyrrhopyge zenodorusDHJ02 | Pyrginae  | 08-SRNP-65047 | MHM XT084-08   | JF762724          |
| 7750       | Pyrrhopyge zenodorusDHJ02 | Pyrginae  | 08-SRNP-70328 | MHM XW074-09   | JF754118          |
| 7751       | Pyrrhopyge zenodorusDHJ02 | Pyrginae  | 08-SRNP-2416  | MHM XW087-09   | JF754119          |
| 7752       | Pyrrhopyge zenodorusDHJ02 | Pyrginae  | 09-SRNP-69426 | MHM YE1439-09  | HQ992246          |
| 7753       | Pyrrhopyge zenodorusDHJ02 | Pyrginae  | 09-SRNP-71854 | MHM YE1440-09  | GU653555          |
| 7754       | Pyrrhopyge zenodorusDHJ02 | Pyrginae  | 09-SRNP-71853 | MHM YE1441-09  | GU653556          |
| 7755       | Pyrrhopyge zenodorusDHJ02 | Pyrginae  | 09-SRNP-41493 | MHM YH112-10   | HM887264          |
| 7756       | Pyrrhopyge crida          | Pyrginae  | 07-SRNP-65395 | MHM XR817-08   | JF762720          |
| 7757       | Pyrrhopyge crida          | Pyrginae  | 07-SRNP-65251 | MHM XR822-08   | JF762715          |
| 7758       | Pyrrhopyge crida          | Pyrginae  | 07-SRNP-65439 | MHM XR820-08   | JF762717          |
| 7759       | Pyrrhopyge crida          | Pyrginae  | 07-SRNP-65440 | MHM XR824-08   | JF762713          |
| 7760       | Pyrrhopyge crida          | Pyrginae  | 07-SRNP-65431 | MHM XR823-08   | JF762714          |
| 7761       | Pyrrhopyge crida          | Pyrginae  | 07-SRNP-65427 | MHM XR821-08   | JF762716          |
| 7762       | Pyrrhopyge crida          | Pyrginae  | 07-SRNP-65438 | MHM XR819-08   | JF762718          |
| 7763       | Pyrrhopyge crida          | Pyrginae  | 07-SRNP-65517 | MHM XR818-08   | JF762719          |
| 7764       | Pyrrhopyge crida          | Pyrginae  | 07-SRNP-65248 | MHM XR815-08   | JF762722          |
| 7765       | Pyrrhopyge crida          | Pyrginae  | 07-SRNP-65186 | MHM XO774-08   | JF762723          |
| 7766       | Pyrrhopyge crida          | Pyrginae  | 07-SRNP-21159 | MHAHL429-07    | JF762708          |
| 7767       | Pyrrhopyge crida          | Pyrginae  | 07-SRNP-65432 | MHAHL428-07    | JF762707          |
| 7768       | Pyrrhopyge crida          | Pyrginae  | 05-SRNP-23087 | MHAHL108-07    | JF762706          |
| 7769       | Pyrrhopyge crida          | Pyrginae  | 05-SRNP-20774 | MHAHL006-07    | JF762704          |
| 7770       | Pyrrhopyge crida          | Pyrginae  | 05-SRNP-20610 | MHAHL005-07    | JF762703          |
| 7771       | Pyrrhopyge crida          | Pyrginae  | 05-SRNP-20173 | MHAHL004-07    | JF762702          |
| 7772       | Pyrrhopyge crida          | Pyrginae  | 04-SRNP-32575 | MHACG850-05    | DQ293142          |
| 7773       | Pyrrhopyge crida          | Pyrginae  | 04-SRNP-34740 | MHAHC467-05    | DQ293152          |
| 7774       | Pyrrhopyge crida          | Pyrginae  | 04-SRNP-34738 | MHAHC466-05    | DQ293151          |
| 7775       | Pyrrhopyge crida          | Pyrginae  | 04-SRNP-34984 | MHAHC465-05    | DQ293150          |
| 7776       | Pyrrhopyge crida          | Pyrginae  | 04-SRNP-33852 | MHAHC464-05    | DQ293149          |
| 7777       | Pyrrhopyge crida          | Pyrginae  | 04-SRNP-34744 | MHAHC463-05    | DQ293148          |
| 7778       | Pyrrhopyge crida          | Pyrginae  | 04-SRNP-34924 | MHAHC462-05    | DQ293147          |
| 7779       | Pyrrhopyge crida          | Pyrginae  | 05-SRNP-20692 | MHAHC461-05    | DQ293146          |
| 7780       | Pyrrhopyge crida          | Pyrginae  | 05-SRNP-20180 | MHAHC460-05    | DQ293145          |
| 7781       | Pyrrhopyge crida          | Pyrginae  | 05-SRNP-20171 | MHAHC459-05    | DQ293144          |
| 7782       | Pyrrhopyge crida          | Pyrginae  | 05-SRNP-20775 | MHAHC458-05    | DQ293143          |
| 7783       | Pyrrhopyge crida          | Pyrginae  | 04-SRNP-34275 | MHAHC301-05    | DQ293139          |

| <b>Tree Order</b> | <b>Species</b>   | <b>Subfamily</b> | <b>ACG Sampleid</b> | <b>BOLD Processid</b> | <b>Genbank Accession</b> |
|-------------------|------------------|------------------|---------------------|-----------------------|--------------------------|
| 7784              | Pyrrhopyge crida | Pyrginae         | 04-SRNP-32812       | MHAHC309-05           | DQ293140                 |
| 7785              | Pyrrhopyge crida | Pyrginae         | 04-SRNP-32576       | MHAHC311-05           | DQ293141                 |
| 7786              | Pyrrhopyge crida | Pyrginae         | 03-SRNP-21852       | MHAHC136-05           | DQ293137                 |
| 7787              | Pyrrhopyge crida | Pyrginae         | 03-SRNP-21862       | MHAHC120-05           | DQ293135                 |
| 7788              | Pyrrhopyge crida | Pyrginae         | 04-SRNP-30780       | MHAHC104-05           | DQ293133                 |
| 7789              | Pyrrhopyge crida | Pyrginae         | 03-SRNP-21855       | MHAHC096-05           | DQ293132                 |
| 7790              | Pyrrhopyge crida | Pyrginae         | 03-SRNP-21853       | MHAHC185-05           | DQ293138                 |
| 7791              | Pyrrhopyge crida | Pyrginae         | 05-SRNP-20952       | MHAHL007-07           | JF762705                 |
| 7792              | Pyrrhopyge crida | Pyrginae         | 07-SRNP-65585       | MHMXR826-08           | JF762711                 |
| 7793              | Pyrrhopyge crida | Pyrginae         | 07-SRNP-65426       | MHMXR825-08           | JF762712                 |
| 7794              | Pyrrhopyge crida | Pyrginae         | 03-SRNP-1149        | CSCR401-04            | DQ293131                 |
| 7795              | Pyrrhopyge crida | Pyrginae         | 01-SRNP-9130        | CSCR215-04            | DQ293130                 |
| 7796              | Pyrrhopyge crida | Pyrginae         | 07-SRNP-65584       | MHMXR816-08           | JF762721                 |
| 7797              | Pyrrhopyge crida | Pyrginae         | 07-SRNP-66213       | MHMXT081-08           | JF762710                 |
| 7798              | Pyrrhopyge crida | Pyrginae         | 03-SRNP-21536       | MHAHC128-05           | DQ293136                 |
| 7799              | Pyrrhopyge crida | Pyrginae         | 03-SRNP-21486       | MHAHC112-05           | DQ293134                 |
| 7800              | Pyrrhopyge crida | Pyrginae         | 05-SRNP-20964       | MHAHC468-05           | DQ293153                 |
| 7801              | Pyrrhopyge crida | Pyrginae         | 08-SRNP-65031       | MHMXT082-08           | JF762709                 |
| 7802              | Pyrrhopyge crida | Pyrginae         | 07-SRNP-65757       | MHMWX089-09           | JF754116                 |
| 7803              | Pyrrhopyge crida | Pyrginae         | 07-SRNP-65984       | MHMWX090-09           | JF754117                 |
| 7804              | Pyrrhopyge crida | Pyrginae         | 09-SRNP-20790       | MHMYH114-10           | HM887266                 |
| 7805              | Myscelus amystis | Pyrginae         | 96-SRNP-365         | CSCR136-04            | DQ292642                 |
| 7806              | Myscelus amystis | Pyrginae         | 05-SRNP-20512       | MHAHF140-06           | GU150555                 |
| 7807              | Myscelus amystis | Pyrginae         | 04-SRNP-26567       | MHAHF144-06           | GU150557                 |
| 7808              | Myscelus amystis | Pyrginae         | 05-SRNP-20288       | MHAHF142-06           | GU150558                 |
| 7809              | Myscelus amystis | Pyrginae         | 05-SRNP-20428       | MHAHF141-06           | GU150554                 |
| 7810              | Myscelus amystis | Pyrginae         | 05-SRNP-20589       | MHAHF139-06           | GU150553                 |
| 7811              | Myscelus amystis | Pyrginae         | 05-SRNP-20514       | MHAHF138-06           | GU150552                 |
| 7812              | Myscelus amystis | Pyrginae         | 04-SRNP-24102       | MHAHD883-05           | GU161671                 |
| 7813              | Myscelus amystis | Pyrginae         | 04-SRNP-21290       | MHAHC121-05           | DQ292645                 |
| 7814              | Myscelus amystis | Pyrginae         | 00-SRNP-6023        | CSRII526-04           | DQ292643                 |
| 7815              | Myscelus amystis | Pyrginae         | 00-SRNP-20049       | CSRII527-04           | DQ292644                 |
| 7816              | Myscelus amystis | Pyrginae         | 05-SRNP-20426       | MHAHF143-06           | GU150556                 |
| 7817              | Myscelus amystis | Pyrginae         | 05-SRNP-20706       | MHAHF145-06           | GU150551                 |
| 7818              | Myscelus amystis | Pyrginae         | 04-SRNP-26566       | MHAHL033-07           | JF762360                 |
| 7819              | Myscelus amystis | Pyrginae         | 05-SRNP-20582       | MHAHL034-07           | JF762361                 |
| 7820              | Passova gellias  | Pyrginae         | 06-SRNP-47761       | MHAHK211-07           | JF760986                 |
| 7821              | Passova gellias  | Pyrginae         | 08-SRNP-5050        | MHMXX663-09           | JF778305                 |
| 7822              | Passova gellias  | Pyrginae         | 98-SRNP-2698        | CSCR175-04            | DQ292835                 |
| 7823              | Passova gellias  | Pyrginae         | 02-SRNP-33556       | MHAHK591-07           | JF760994                 |
| 7824              | Passova gellias  | Pyrginae         | 03-SRNP-4222        | MHAHK589-07           | JF760992                 |
| 7825              | Passova gellias  | Pyrginae         | 01-SRNP-3818        | MHAHK585-07           | JF760988                 |
| 7826              | Passova gellias  | Pyrginae         | 08-SRNP-5586        | MHMXX664-09           | JF778306                 |
| 7827              | Passova gellias  | Pyrginae         | 08-SRNP-5267        | MHMXX665-09           | JF778307                 |
| 7828              | Passova gellias  | Pyrginae         | 07-SRNP-23493       | MHMXR809-08           | JF762541                 |
| 7829              | Passova gellias  | Pyrginae         | 07-SRNP-65612       | MHMXR814-08           | JF762540                 |
| 7830              | Passova gellias  | Pyrginae         | 07-SRNP-2695        | MHMXXO769-08          | JF762543                 |
| 7831              | Passova gellias  | Pyrginae         | 07-SRNP-65778       | MHMXR808-08           | JF762542                 |
| 7832              | Passova gellias  | Pyrginae         | 02-SRNP-33544       | MHAHK594-07           | JF760997                 |
| 7833              | Passova gellias  | Pyrginae         | 02-SRNP-18208       | MHAHK593-07           | JF760996                 |
| 7834              | Passova gellias  | Pyrginae         | 03-SRNP-25876       | MHAHK590-07           | JF760993                 |
| 7835              | Passova gellias  | Pyrginae         | 03-SRNP-34742       | MHAHK588-07           | JF760991                 |
| 7836              | Passova gellias  | Pyrginae         | 02-SRNP-18690       | MHAHK587-07           | JF760990                 |
| 7837              | Passova gellias  | Pyrginae         | 02-SRNP-18842       | MHAHK586-07           | JF760989                 |
| 7838              | Passova gellias  | Pyrginae         | 04-SRNP-35968       | MHAHF150-06           | GU150671                 |
| 7839              | Passova gellias  | Pyrginae         | 04-SRNP-33962       | MHAHD817-05           | GU161778                 |

| Tree Order | Species                     | Subfamily | ACG Sampleid  | BOLD Processid | Genbank Accession |
|------------|-----------------------------|-----------|---------------|----------------|-------------------|
| 7840       | Passova gellias             | Pyrginae  | 04-SRNP-46731 | MHAHC177-05    | DQ292838          |
| 7841       | Passova gellias             | Pyrginae  | 04-SRNP-2750  | MHAHC169-05    | DQ292837          |
| 7842       | Passova gellias             | Pyrginae  | 02-SRNP-18968 | MHAHK592-07    | JF760995          |
| 7843       | Passova gellias             | Pyrginae  | 07-SRNP-501   | MHMXX145-07    | JF762544          |
| 7844       | Passova gellias             | Pyrginae  | 02-SRNP-903   | MHAHK584-07    | JF760987          |
| 7845       | Passova gellias             | Pyrginae  | 04-SRNP-4530  | MHAHD816-05    | GU161777          |
| 7846       | Passova gellias             | Pyrginae  | 02-SRNP-18863 | CSCR176-04     | DQ292836          |
| 7847       | Passova gellias             | Pyrginae  | 08-SRNP-348   | MHMXT085-08    | JF762539          |
| 7848       | Passova gellias             | Pyrginae  | 09-SRNP-881   | MHMYC456-09    | GU649880          |
| 7849       | Passova gellias             | Pyrginae  | 08-SRNP-5268  | MHMXX666-09    | JF778308          |
| 7850       | Passova gellias             | Pyrginae  | 09-SRNP-57397 | MHMYH113-10    | HM887265          |
| 7851       | Myscelus assaricus michaeli | Pyrginae  | 04-SRNP-1946  | MHAHC097-05    | DQ292648          |
| 7852       | Myscelus assaricus michaeli | Pyrginae  | 02-SRNP-33561 | MHAHK598-07    | JF760881          |
| 7853       | Myscelus assaricus michaeli | Pyrginae  | 02-SRNP-33559 | MHAHK597-07    | JF760880          |
| 7854       | Myscelus assaricus michaeli | Pyrginae  | 02-SRNP-33574 | MHAHK595-07    | JF760878          |
| 7855       | Myscelus assaricus michaeli | Pyrginae  | 04-SRNP-2100  | MHAHC113-05    | DQ292650          |
| 7856       | Myscelus assaricus michaeli | Pyrginae  | 04-SRNP-2099  | MHAHC105-05    | DQ292649          |
| 7857       | Myscelus assaricus michaeli | Pyrginae  | 03-SRNP-6544  | CSCR375-04     | DQ292647          |
| 7858       | Myscelus assaricus michaeli | Pyrginae  | 03-SRNP-6120  | CSCR374-04     | DQ292646          |
| 7859       | Myscelus assaricus michaeli | Pyrginae  | 02-SRNP-33572 | MHAHK596-07    | JF760879          |
| 7860       | Myscelus assaricus michaeli | Pyrginae  | 02-SRNP-33568 | MHAHK599-07    | JF760882          |
| 7861       | Myscelus assaricus michaeli | Pyrginae  | 03-SRNP-5954  | MHAHK600-07    | JF760883          |
| 7862       | Myscelus assaricus michaeli | Pyrginae  | 08-SRNP-1740  | MHMXS085-08    | JF762362          |
| 7863       | Myscelus assaricus michaeli | Pyrginae  | 08-SRNP-65643 | MHMXX660-09    | JF778092          |
| 7864       | Myscelus perissodora        | Pyrginae  | 03-SRNP-6256  | CSCR378-04     | DQ292657          |
| 7865       | Myscelus perissodora        | Pyrginae  | 99-SRNP-2587  | CSCR138-04     | DQ292656          |
| 7866       | Myscelus belti              | Pyrginae  | 07-SRNP-66198 | MHMXT175-08    | JF762365          |
| 7867       | Myscelus belti              | Pyrginae  | 07-SRNP-1252  | MHAHL118-07    | JF762364          |
| 7868       | Myscelus belti              | Pyrginae  | 07-SRNP-3251  | MHMXP148-08    | JF762372          |
| 7869       | Myscelus belti              | Pyrginae  | 08-SRNP-1651  | MHMXX960-09    | JF778093          |
| 7870       | Myscelus belti              | Pyrginae  | 08-SRNP-72474 | MHMXY1134-09   | GU666405          |
| 7871       | Myscelus belti              | Pyrginae  | 07-SRNP-3252  | MHMXP149-08    | JF762371          |
| 7872       | Myscelus belti              | Pyrginae  | 07-SRNP-36505 | MHMXR752-08    | JF762369          |
| 7873       | Myscelus belti              | Pyrginae  | 09-SRNP-20103 | MHMXY1135-09   | GU666409          |
| 7874       | Myscelus belti              | Pyrginae  | 09-SRNP-20720 | MHMYG2460-10   | HM885886          |
| 7875       | Myscelus belti              | Pyrginae  | 09-SRNP-4463  | MHMYG2461-10   | HM885888          |
| 7876       | Myscelus belti              | Pyrginae  | 09-SRNP-4464  | MHMYG2462-10   | HM885889          |
| 7877       | Myscelus belti              | Pyrginae  | 07-SRNP-32809 | MHAHL117-07    | JF762363          |
| 7878       | Myscelus belti              | Pyrginae  | 05-SRNP-2091  | MHAHF153-06    | GU150559          |
| 7879       | Myscelus belti              | Pyrginae  | 04-SRNP-34960 | MHAHE346-05    | GU149747          |
| 7880       | Myscelus belti              | Pyrginae  | 04-SRNP-3418  | MHAHE345-05    | GU149748          |
| 7881       | Myscelus belti              | Pyrginae  | 04-SRNP-23919 | MHAHE344-05    | GU149749          |
| 7882       | Myscelus belti              | Pyrginae  | 04-SRNP-23918 | MHAHE343-05    | GU149750          |
| 7883       | Myscelus belti              | Pyrginae  | 04-SRNP-31804 | MHAHE342-05    | GU149745          |
| 7884       | Myscelus belti              | Pyrginae  | 04-SRNP-33998 | MHAHE339-05    | GU149746          |
| 7885       | Myscelus belti              | Pyrginae  | 04-SRNP-35333 | MHAHC186-05    | DQ292655          |
| 7886       | Myscelus belti              | Pyrginae  | 04-SRNP-35100 | MHAHC178-05    | DQ292654          |
| 7887       | Myscelus belti              | Pyrginae  | 04-SRNP-35393 | MHAHC170-05    | DQ292653          |
| 7888       | Myscelus belti              | Pyrginae  | 07-SRNP-65976 | MHMXT172-08    | JF762368          |
| 7889       | Myscelus belti              | Pyrginae  | 07-SRNP-3391  | MHMXP150-08    | JF762370          |
| 7890       | Myscelus belti              | Pyrginae  | 03-SRNP-6307  | CSCR376-04     | DQ292651          |
| 7891       | Myscelus belti              | Pyrginae  | 07-SRNP-65974 | MHMXT173-08    | JF762367          |
| 7892       | Myscelus belti              | Pyrginae  | 03-SRNP-3151  | CSCR377-04     | DQ292652          |
| 7893       | Myscelus belti              | Pyrginae  | 07-SRNP-66043 | MHMXT174-08    | JF762366          |
| 7894       | Myscelus belti              | Pyrginae  | 09-SRNP-69008 | MHMYC455-09    | GU649879          |
| 7895       | Myscelus belti              | Pyrginae  | 09-SRNP-20102 | MHMYG2500-10   | HM885928          |

| <b>Tree Order</b> | <b>Species</b>            | <b>Subfamily</b> | <b>ACG Sampleid</b> | <b>BOLD Processid</b> | <b>Genbank Accession</b> |
|-------------------|---------------------------|------------------|---------------------|-----------------------|--------------------------|
| 7896              | Oxynetra hopfferi         | Pyrginae         | 02-SRNP-23286       | CSCR169-04            | DQ292811                 |
| 7897              | Oxynetra hopfferi         | Pyrginae         | 02-SRNP-23284       | CSCR168-04            | DQ292810                 |
| 7898              | Oxynetra hopfferi         | Pyrginae         | 01-SRNP-6995        | CSRII747-05           | DQ292818                 |
| 7899              | Oxynetra hopfferi         | Pyrginae         | 02-SRNP-23283       | CSRII714-05           | DQ292815                 |
| 7900              | Oxynetra hopfferi         | Pyrginae         | 02-SRNP-23540       | CSRII715-05           | DQ292816                 |
| 7901              | Oxynetra hopfferi         | Pyrginae         | 02-SRNP-24529       | CSRII716-05           | DQ292817                 |
| 7902              | Oxynetra hopfferi         | Pyrginae         | 02-SRNP-23285       | CSRII697-05           | DQ292812                 |
| 7903              | Oxynetra hopfferi         | Pyrginae         | 02-SRNP-23109       | CSRII705-05           | DQ292813                 |
| 7904              | Oxynetra hopfferi         | Pyrginae         | 02-SRNP-23110       | CSRII713-05           | DQ292814                 |
| 7905              | Oxynetra hopfferi         | Pyrginae         | 03-SRNP-3638        | MHAAHK543-07          | JF760954                 |
| 7906              | Bungalotis erythus        | Pyrginae         | 08-SRNP-65506       | MHMXW127-09           | JF753731                 |
| 7907              | Bungalotis erythus        | Pyrginae         | 08-SRNP-70954       | MHMXW125-09           | JF753729                 |
| 7908              | Bungalotis erythus        | Pyrginae         | 08-SRNP-21006       | MHMXW119-09           | JF753728                 |
| 7909              | Bungalotis erythus        | Pyrginae         | 08-SRNP-20672       | MHMXW118-09           | JF753727                 |
| 7910              | Bungalotis erythus        | Pyrginae         | 07-SRNP-46538       | MHMXT225-08           | JF761704                 |
| 7911              | Bungalotis erythus        | Pyrginae         | 07-SRNP-65250       | MHMXR756-08           | JF761705                 |
| 7912              | Bungalotis erythus        | Pyrginae         | 07-SRNP-41269       | MHAHL532-07           | JF761703                 |
| 7913              | Bungalotis erythus        | Pyrginae         | 07-SRNP-21991       | MHAHL531-07           | JF761702                 |
| 7914              | Bungalotis erythus        | Pyrginae         | 07-SRNP-940         | MHAHL530-07           | JF761701                 |
| 7915              | Bungalotis erythus        | Pyrginae         | 05-SRNP-33392       | MHAHI684-06           | GU155846                 |
| 7916              | Bungalotis erythus        | Pyrginae         | 06-SRNP-20583       | MHAHH437-06           | GU155207                 |
| 7917              | Bungalotis erythus        | Pyrginae         | 05-SRNP-45216       | MHAHF562-06           | GU150269                 |
| 7918              | Bungalotis erythus        | Pyrginae         | 05-SRNP-47613       | MHAHF561-06           | GU150268                 |
| 7919              | Bungalotis erythus        | Pyrginae         | 04-SRNP-55857       | MHAHF137-06           | GU150270                 |
| 7920              | Bungalotis erythus        | Pyrginae         | 04-SRNP-22883       | MHAHE306-05           | GU149448                 |
| 7921              | Bungalotis erythus        | Pyrginae         | 04-SRNP-61431       | MHAHE305-05           | GU149446                 |
| 7922              | Bungalotis erythus        | Pyrginae         | 04-SRNP-3609        | MHAHE304-05           | GU149444                 |
| 7923              | Bungalotis erythus        | Pyrginae         | 05-SRNP-20556       | MHAHE303-05           | GU149445                 |
| 7924              | Bungalotis erythus        | Pyrginae         | 04-SRNP-22815       | MHAHE302-05           | GU149449                 |
| 7925              | Bungalotis erythus        | Pyrginae         | 04-SRNP-4963        | MHAHE301-05           | GU149447                 |
| 7926              | Bungalotis erythus        | Pyrginae         | 07-SRNP-20903       | MHAHL528-07           | JF761699                 |
| 7927              | Bungalotis erythus        | Pyrginae         | 01-SRNP-24401       | CSCR046-04            | DQ291913                 |
| 7928              | Bungalotis erythus        | Pyrginae         | 07-SRNP-941         | MHAHL529-07           | JF761700                 |
| 7929              | Bungalotis erythus        | Pyrginae         | 97-SRNP-6142        | CSCR045-04            | DQ291912                 |
| 7930              | Bungalotis erythus        | Pyrginae         | 08-SRNP-70955       | MHMXW126-09           | JF753730                 |
| 7931              | Bungalotis erythus        | Pyrginae         | 08-SRNP-65224       | MHMXW135-09           | JF753732                 |
| 7932              | Bungalotis erythus        | Pyrginae         | 07-SRNP-36879       | MHMXW136-09           | JF753733                 |
| 7933              | Bungalotis erythus        | Pyrginae         | 08-SRNP-200         | MHMXW138-09           | JF753734                 |
| 7934              | Bungalotis erythus        | Pyrginae         | 08-SRNP-65769       | MHMXY1139-09          | GU666407                 |
| 7935              | Bungalotis quadratumDHJ02 | Pyrginae         | 05-SRNP-2515        | MHAHF369-06           | GU150278                 |
| 7936              | Bungalotis quadratumDHJ02 | Pyrginae         | 07-SRNP-66034       | MHMXT234-08           | JF761728                 |
| 7937              | Bungalotis quadratumDHJ02 | Pyrginae         | 05-SRNP-23625       | MHAHI686-06           | GU155850                 |
| 7938              | Bungalotis quadratumDHJ02 | Pyrginae         | 05-SRNP-3116        | MHAHF396-06           | GU150288                 |
| 7939              | Bungalotis quadratumDHJ02 | Pyrginae         | 07-SRNP-4096        | MHMXT132-08           | JF761730                 |
| 7940              | Bungalotis quadratumDHJ02 | Pyrginae         | 07-SRNP-66035       | MHMXT131-08           | JF761731                 |
| 7941              | Bungalotis quadratumDHJ02 | Pyrginae         | 06-SRNP-31687       | MHAHH531-06           | GU155211                 |
| 7942              | Bungalotis quadratumDHJ02 | Pyrginae         | 03-SRNP-1484        | CSCR321-04            | DQ291921                 |
| 7943              | Bungalotis quadratumDHJ02 | Pyrginae         | 02-SRNP-33238       | XAA804-04             | DQ291940                 |
| 7944              | Bungalotis quadratumDHJ02 | Pyrginae         | 02-SRNP-14657       | XAA756-04             | DQ291924                 |
| 7945              | Bungalotis quadratumDHJ02 | Pyrginae         | 02-SRNP-20465       | XAA771-04             | DQ291929                 |
| 7946              | Bungalotis quadratumDHJ02 | Pyrginae         | 05-SRNP-21979       | MHAHF389-06           | GU150291                 |
| 7947              | Bungalotis quadratumDHJ02 | Pyrginae         | 06-SRNP-517         | MHAHG691-06           | GU151221                 |
| 7948              | Bungalotis quadratumDHJ02 | Pyrginae         | 08-SRNP-65212       | MHMXW050-09           | JF753772                 |
| 7949              | Bungalotis quadratumDHJ02 | Pyrginae         | 08-SRNP-65420       | MHMXW098-09           | JF753774                 |
| 7950              | Bungalotis quadratumDHJ02 | Pyrginae         | 05-SRNP-41328       | MHAHF385-06           | GU150285                 |
| 7951              | Bungalotis quadratumDHJ02 | Pyrginae         | 05-SRNP-3115        | MHAHF393-06           | GU150292                 |

| <b>Tree Order</b> | <b>Species</b>            | <b>Subfamily</b> | <b>ACG Sampleid</b> | <b>BOLD Processid</b> | <b>Genbank Accession</b> |
|-------------------|---------------------------|------------------|---------------------|-----------------------|--------------------------|
| 7952              | Bungalotis quadratumDHJ02 | Pyrginae         | 04-SRNP-10345       | MHAHE331-05           | GU149456                 |
| 7953              | Bungalotis quadratumDHJ02 | Pyrginae         | 05-SRNP-21480       | MHAHF378-06           | GU150279                 |
| 7954              | Bungalotis quadratumDHJ02 | Pyrginae         | 05-SRNP-41367       | MHAHF387-06           | GU150289                 |
| 7955              | Bungalotis quadratumDHJ02 | Pyrginae         | 05-SRNP-40975       | MHAHF391-06           | GU150295                 |
| 7956              | Bungalotis quadratumDHJ02 | Pyrginae         | 06-SRNP-3854        | MHAHI139-06           | GU155847                 |
| 7957              | Bungalotis quadratumDHJ02 | Pyrginae         | 08-SRNP-65367       | MHMXW045-09           | JF753770                 |
| 7958              | Bungalotis quadratumDHJ02 | Pyrginae         | 08-SRNP-65296       | MHMXW058-09           | JF753773                 |
| 7959              | Bungalotis quadratumDHJ02 | Pyrginae         | 08-SRNP-2181        | MHMXW105-09           | JF753775                 |
| 7960              | Bungalotis quadratumDHJ02 | Pyrginae         | 05-SRNP-21366       | MHAHF394-06           | GU150275                 |
| 7961              | Bungalotis quadratumDHJ02 | Pyrginae         | 07-SRNP-42298       | MHMXO896-08           | JF761733                 |
| 7962              | Bungalotis quadratumDHJ02 | Pyrginae         | 07-SRNP-2736        | MHAHL543-07           | JF761727                 |
| 7963              | Bungalotis quadratumDHJ02 | Pyrginae         | 05-SRNP-1726        | MHAHF395-06           | GU150276                 |
| 7964              | Bungalotis quadratumDHJ02 | Pyrginae         | 05-SRNP-12052       | MHAHF392-06           | GU150294                 |
| 7965              | Bungalotis quadratumDHJ02 | Pyrginae         | 04-SRNP-21541       | MHAHE333-05           | GU149455                 |
| 7966              | Bungalotis quadratumDHJ02 | Pyrginae         | 05-SRNP-8122        | MHAHG689-06           | GU151215                 |
| 7967              | Bungalotis quadratumDHJ02 | Pyrginae         | 04-SRNP-20799       | MHAHE328-05           | GU149457                 |
| 7968              | Bungalotis quadratumDHJ02 | Pyrginae         | 05-SRNP-64394       | MHAHG690-06           | GU151220                 |
| 7969              | Bungalotis quadratumDHJ02 | Pyrginae         | 07-SRNP-2182        | MHMXO898-08           | JF761732                 |
| 7970              | Bungalotis quadratumDHJ02 | Pyrginae         | 07-SRNP-65520       | MHMXT133-08           | JF761729                 |
| 7971              | Bungalotis quadratumDHJ02 | Pyrginae         | 08-SRNP-65306       | MHMXW044-09           | JF753769                 |
| 7972              | Bungalotis quadratumDHJ02 | Pyrginae         | 08-SRNP-318         | MHMXW047-09           | JF753771                 |
| 7973              | Bungalotis quadratumDHJ02 | Pyrginae         | 08-SRNP-21949       | MHMXY1137-09          | GU666411                 |
| 7974              | Bungalotis quadratumDHJ02 | Pyrginae         | 08-SRNP-21946       | MHMXY1138-09          | GU666406                 |
| 7975              | Bungalotis quadratumDHJ01 | Pyrginae         | 07-SRNP-20456       | MHMXR750-08           | JF761723                 |
| 7976              | Bungalotis quadratumDHJ01 | Pyrginae         | 07-SRNP-65502       | MHMXR751-08           | JF761722                 |
| 7977              | Bungalotis quadratumDHJ01 | Pyrginae         | 08-SRNP-1902        | MHMXW040-09           | JF753735                 |
| 7978              | Bungalotis quadratumDHJ01 | Pyrginae         | 08-SRNP-55655       | MHMXW041-09           | JF753736                 |
| 7979              | Bungalotis quadratumDHJ01 | Pyrginae         | 08-SRNP-65339       | MHMXW042-09           | JF753737                 |
| 7980              | Bungalotis quadratumDHJ01 | Pyrginae         | 08-SRNP-20633       | MHMXW051-09           | JF753742                 |
| 7981              | Bungalotis quadratumDHJ01 | Pyrginae         | 08-SRNP-20846       | MHMXW052-09           | JF753743                 |
| 7982              | Bungalotis quadratumDHJ01 | Pyrginae         | 08-SRNP-65211       | MHMXW094-09           | JF753752                 |
| 7983              | Bungalotis quadratumDHJ01 | Pyrginae         | 07-SRNP-42880       | MHMXW095-09           | JF753753                 |
| 7984              | Bungalotis quadratumDHJ01 | Pyrginae         | 08-SRNP-65342       | MHMXW101-09           | JF753758                 |
| 7985              | Bungalotis quadratumDHJ01 | Pyrginae         | 08-SRNP-2564        | MHMXW103-09           | JF753760                 |
| 7986              | Bungalotis quadratumDHJ01 | Pyrginae         | 07-SRNP-1559        | MHAHL544-07           | JF761713                 |
| 7987              | Bungalotis quadratumDHJ01 | Pyrginae         | 07-SRNP-1560        | MHAHL541-07           | JF761711                 |
| 7988              | Bungalotis quadratumDHJ01 | Pyrginae         | 07-SRNP-1561        | MHAHL526-07           | JF761708                 |
| 7989              | Bungalotis quadratumDHJ01 | Pyrginae         | 06-SRNP-5401        | MHAHI138-06           | GU155848                 |
| 7990              | Bungalotis quadratumDHJ01 | Pyrginae         | 05-SRNP-2294        | MHAHF388-06           | GU150287                 |
| 7991              | Bungalotis quadratumDHJ01 | Pyrginae         | 05-SRNP-2447        | MHAHF386-06           | GU150274                 |
| 7992              | Bungalotis quadratumDHJ01 | Pyrginae         | 05-SRNP-21145       | MHAHF384-06           | GU150293                 |
| 7993              | Bungalotis quadratumDHJ01 | Pyrginae         | 05-SRNP-12053       | MHAHF381-06           | GU150286                 |
| 7994              | Bungalotis quadratumDHJ01 | Pyrginae         | 05-SRNP-2293        | MHAHF380-06           | GU150272                 |
| 7995              | Bungalotis quadratumDHJ01 | Pyrginae         | 05-SRNP-21739       | MHAHF375-06           | GU150280                 |
| 7996              | Bungalotis quadratumDHJ01 | Pyrginae         | 04-SRNP-32299       | MHAHE334-05           | GU149452                 |
| 7997              | Bungalotis quadratumDHJ01 | Pyrginae         | 04-SRNP-20807       | MHAHE329-05           | GU149458                 |
| 7998              | Bungalotis quadratumDHJ01 | Pyrginae         | 04-SRNP-21611       | MHAHE327-05           | GU149451                 |
| 7999              | Bungalotis quadratumDHJ01 | Pyrginae         | 07-SRNP-1876        | MHAHL540-07           | JF761710                 |
| 8000              | Bungalotis quadratumDHJ01 | Pyrginae         | 03-SRNP-1652        | CSCR320-04            | DQ291920                 |
| 8001              | Bungalotis quadratumDHJ01 | Pyrginae         | 07-SRNP-21698       | MHMXT135-08           | JF761720                 |
| 8002              | Bungalotis quadratumDHJ01 | Pyrginae         | 05-SRNP-3021        | MHAHF376-06           | GU150281                 |
| 8003              | Bungalotis quadratumDHJ01 | Pyrginae         | 02-SRNP-1284        | XAA803-04             | DQ291939                 |
| 8004              | Bungalotis quadratumDHJ01 | Pyrginae         | 02-SRNP-20466       | XAA763-04             | DQ291926                 |
| 8005              | Bungalotis quadratumDHJ01 | Pyrginae         | 02-SRNP-31454       | XAA820-04             | DQ291944                 |
| 8006              | Bungalotis quadratumDHJ01 | Pyrginae         | 03-SRNP-1253        | XAA796-04             | DQ291938                 |
| 8007              | Bungalotis quadratumDHJ01 | Pyrginae         | 02-SRNP-14135       | XAA780-04             | DQ291933                 |

| <b>Tree Order</b> | <b>Species</b>            | <b>Subfamily</b> | <b>ACG Sampleid</b> | <b>BOLD Processid</b> | <b>Genbank Accession</b> |
|-------------------|---------------------------|------------------|---------------------|-----------------------|--------------------------|
| 8008              | Bungalotis quadratumDHJ01 | Pyrginae         | 02-SRNP-4554        | XAA819-04             | DQ291943                 |
| 8009              | Bungalotis quadratumDHJ01 | Pyrginae         | 02-SRNP-2667        | XAA837-04             | DQ291949                 |
| 8010              | Bungalotis quadratumDHJ01 | Pyrginae         | 02-SRNP-1283        | XAA755-04             | DQ291923                 |
| 8011              | Bungalotis quadratumDHJ01 | Pyrginae         | 02-SRNP-33827       | XAA779-04             | DQ291932                 |
| 8012              | Bungalotis quadratumDHJ01 | Pyrginae         | 02-SRNP-2075        | XAA787-04             | DQ291935                 |
| 8013              | Bungalotis quadratumDHJ01 | Pyrginae         | 02-SRNP-4552        | XAA835-04             | DQ291947                 |
| 8014              | Bungalotis quadratumDHJ01 | Pyrginae         | 07-SRNP-46004       | MHMXT231-08           | JF761716                 |
| 8015              | Bungalotis quadratumDHJ01 | Pyrginae         | 08-SRNP-65328       | MHMXXW108-09          | JF753764                 |
| 8016              | Bungalotis quadratumDHJ01 | Pyrginae         | 08-SRNP-40971       | MHMXX681-09           | JF777712                 |
| 8017              | Bungalotis quadratumDHJ01 | Pyrginae         | 08-SRNP-65688       | MHMXY1136-09          | GU666410                 |
| 8018              | Bungalotis quadratumDHJ01 | Pyrginae         | 09-SRNP-20206       | MHMYG2454-10          | HM885880                 |
| 8019              | Bungalotis quadratumDHJ01 | Pyrginae         | 05-SRNP-12177       | MHAHF390-06           | GU150296                 |
| 8020              | Bungalotis quadratumDHJ01 | Pyrginae         | 05-SRNP-3054        | MHAHF371-06           | GU150297                 |
| 8021              | Bungalotis quadratumDHJ01 | Pyrginae         | 05-SRNP-30602       | MHAHF372-06           | GU150282                 |
| 8022              | Bungalotis quadratumDHJ01 | Pyrginae         | 05-SRNP-3055        | MHAHF370-06           | GU150298                 |
| 8023              | Bungalotis quadratumDHJ01 | Pyrginae         | 07-SRNP-2743        | MHMXXO900-08          | JF761724                 |
| 8024              | Bungalotis quadratumDHJ01 | Pyrginae         | 02-SRNP-6982        | XAA827-04             | DQ291945                 |
| 8025              | Bungalotis quadratumDHJ01 | Pyrginae         | 05-SRNP-3484        | MHAHF377-06           | GU150277                 |
| 8026              | Bungalotis quadratumDHJ01 | Pyrginae         | 07-SRNP-5038        | MHMXT136-08           | JF761719                 |
| 8027              | Bungalotis quadratumDHJ01 | Pyrginae         | 05-SRNP-3088        | MHAHF368-06           | GU150299                 |
| 8028              | Bungalotis quadratumDHJ01 | Pyrginae         | 08-SRNP-40281       | MHMXXW111-09          | JF753767                 |
| 8029              | Bungalotis quadratumDHJ01 | Pyrginae         | 08-SRNP-40180       | MHMXXW110-09          | JF753766                 |
| 8030              | Bungalotis quadratumDHJ01 | Pyrginae         | 08-SRNP-586         | MHMXXW109-09          | JF753765                 |
| 8031              | Bungalotis quadratumDHJ01 | Pyrginae         | 08-SRNP-65341       | MHMXXW107-09          | JF753763                 |
| 8032              | Bungalotis quadratumDHJ01 | Pyrginae         | 08-SRNP-65340       | MHMXXW106-09          | JF753762                 |
| 8033              | Bungalotis quadratumDHJ01 | Pyrginae         | 07-SRNP-12438       | MHMXXW104-09          | JF753761                 |
| 8034              | Bungalotis quadratumDHJ01 | Pyrginae         | 08-SRNP-65454       | MHMXXW102-09          | JF753759                 |
| 8035              | Bungalotis quadratumDHJ01 | Pyrginae         | 08-SRNP-65515       | MHMXXW100-09          | JF753757                 |
| 8036              | Bungalotis quadratumDHJ01 | Pyrginae         | 08-SRNP-65368       | MHMXXW099-09          | JF753756                 |
| 8037              | Bungalotis quadratumDHJ01 | Pyrginae         | 08-SRNP-65459       | MHMXXW097-09          | JF753755                 |
| 8038              | Bungalotis quadratumDHJ01 | Pyrginae         | 08-SRNP-65164       | MHMXXW093-09          | JF753751                 |
| 8039              | Bungalotis quadratumDHJ01 | Pyrginae         | 08-SRNP-267         | MHMXXW092-09          | JF753750                 |
| 8040              | Bungalotis quadratumDHJ01 | Pyrginae         | 07-SRNP-4896        | MHMXXW091-09          | JF753749                 |
| 8041              | Bungalotis quadratumDHJ01 | Pyrginae         | 08-SRNP-65276       | MHMXXW057-09          | JF753748                 |
| 8042              | Bungalotis quadratumDHJ01 | Pyrginae         | 08-SRNP-585         | MHMXXW056-09          | JF753747                 |
| 8043              | Bungalotis quadratumDHJ01 | Pyrginae         | 08-SRNP-65305       | MHMXXW055-09          | JF753746                 |
| 8044              | Bungalotis quadratumDHJ01 | Pyrginae         | 08-SRNP-21065       | MHMXXW054-09          | JF753745                 |
| 8045              | Bungalotis quadratumDHJ01 | Pyrginae         | 08-SRNP-1750        | MHMXXW053-09          | JF753744                 |
| 8046              | Bungalotis quadratumDHJ01 | Pyrginae         | 08-SRNP-45152       | MHMXXW049-09          | JF753741                 |
| 8047              | Bungalotis quadratumDHJ01 | Pyrginae         | 08-SRNP-296         | MHMXXW048-09          | JF753740                 |
| 8048              | Bungalotis quadratumDHJ01 | Pyrginae         | 08-SRNP-2182        | MHMXXW046-09          | JF753739                 |
| 8049              | Bungalotis quadratumDHJ01 | Pyrginae         | 08-SRNP-65327       | MHMXXW043-09          | JF753738                 |
| 8050              | Bungalotis quadratumDHJ01 | Pyrginae         | 08-SRNP-164         | MHMXT233-08           | JF761714                 |
| 8051              | Bungalotis quadratumDHJ01 | Pyrginae         | 07-SRNP-3504        | MHMXT232-08           | JF761715                 |
| 8052              | Bungalotis quadratumDHJ01 | Pyrginae         | 08-SRNP-40213       | MHMXT134-08           | JF761721                 |
| 8053              | Bungalotis quadratumDHJ01 | Pyrginae         | 07-SRNP-21331       | MHMXXO895-08          | JF761725                 |
| 8054              | Bungalotis quadratumDHJ01 | Pyrginae         | 07-SRNP-3488        | MHMXXO894-08          | JF761726                 |
| 8055              | Bungalotis quadratumDHJ01 | Pyrginae         | 07-SRNP-566         | MHAHL542-07           | JF761712                 |
| 8056              | Bungalotis quadratumDHJ01 | Pyrginae         | 07-SRNP-21349       | MHAHL525-07           | JF761707                 |
| 8057              | Bungalotis quadratumDHJ01 | Pyrginae         | 05-SRNP-22370       | MHAHI679-06           | GU155849                 |
| 8058              | Bungalotis quadratumDHJ01 | Pyrginae         | 06-SRNP-41272       | MHAHH438-06           | GU155209                 |
| 8059              | Bungalotis quadratumDHJ01 | Pyrginae         | 06-SRNP-20160       | MHAHH436-06           | GU155210                 |
| 8060              | Bungalotis quadratumDHJ01 | Pyrginae         | 06-SRNP-1694        | MHAHG692-06           | GU151222                 |
| 8061              | Bungalotis quadratumDHJ01 | Pyrginae         | 06-SRNP-2564        | MHAHG688-06           | GU151218                 |
| 8062              | Bungalotis quadratumDHJ01 | Pyrginae         | 06-SRNP-1945        | MHAHG687-06           | GU151217                 |
| 8063              | Bungalotis quadratumDHJ01 | Pyrginae         | 06-SRNP-1686        | MHAHG686-06           | GU151219                 |



| Tree Order | Species                   | Subfamily | ACG Sampleid    | BOLD Processid | Genbank Accession |
|------------|---------------------------|-----------|-----------------|----------------|-------------------|
| 8064       | Bungalotis quadratumDHJ01 | Pyrginae  | 06-SRNP-260     | MHAHG685-06    | GU151216          |
| 8065       | Bungalotis quadratumDHJ01 | Pyrginae  | 05-SRNP-4567    | MHAHF383-06    | GU150290          |
| 8066       | Bungalotis quadratumDHJ01 | Pyrginae  | 05-SRNP-999     | MHAHF382-06    | GU150273          |
| 8067       | Bungalotis quadratumDHJ01 | Pyrginae  | 05-SRNP-3053    | MHAHF379-06    | GU150284          |
| 8068       | Bungalotis quadratumDHJ01 | Pyrginae  | 04-SRNP-48823   | MHAHE332-05    | GU149454          |
| 8069       | Bungalotis quadratumDHJ01 | Pyrginae  | 05-SRNP-55167   | MHAHE330-05    | GU149453          |
| 8070       | Bungalotis quadratumDHJ01 | Pyrginae  | 07-SRNP-4148    | MHMXT137-08    | JF761718          |
| 8071       | Bungalotis quadratumDHJ01 | Pyrginae  | 05-SRNP-20357   | MHAHF373-06    | GU150283          |
| 8072       | Bungalotis quadratumDHJ01 | Pyrginae  | 07-SRNP-4097    | MHMXT230-08    | JF761717          |
| 8073       | Bungalotis quadratumDHJ01 | Pyrginae  | 07-SRNP-1859    | MHAHL539-07    | JF761709          |
| 8074       | Bungalotis quadratumDHJ01 | Pyrginae  | 02-SRNP-3261    | XAA836-04      | DQ291948          |
| 8075       | Bungalotis quadratumDHJ01 | Pyrginae  | 02-SRNP-14043   | XAA811-04      | DQ291941          |
| 8076       | Bungalotis quadratumDHJ01 | Pyrginae  | 02-SRNP-3643    | XAA795-04      | DQ291937          |
| 8077       | Bungalotis quadratumDHJ01 | Pyrginae  | 02-SRNP-2979    | XAA844-04      | DQ291950          |
| 8078       | Bungalotis quadratumDHJ01 | Pyrginae  | 02-SRNP-3867    | XAA828-04      | DQ291946          |
| 8079       | Bungalotis quadratumDHJ01 | Pyrginae  | 02-SRNP-18838   | XAA812-04      | DQ291942          |
| 8080       | Bungalotis quadratumDHJ01 | Pyrginae  | 02-SRNP-2994    | XAA772-04      | DQ291930          |
| 8081       | Bungalotis quadratumDHJ01 | Pyrginae  | 02-SRNP-14137   | XAA764-04      | DQ291927          |
| 8082       | Bungalotis quadratumDHJ01 | Pyrginae  | 02-SRNP-14083   | XAA845-04      | DQ291951          |
| 8083       | Bungalotis quadratumDHJ01 | Pyrginae  | 01-SRNP-628     | XAA762-04      | DQ291925          |
| 8084       | Bungalotis quadratumDHJ01 | Pyrginae  | 02-SRNP-5698    | XAA788-04      | DQ291936          |
| 8085       | Bungalotis quadratumDHJ01 | Pyrginae  | 02-SRNP-2310    | XAA754-04      | DQ291922          |
| 8086       | Bungalotis quadratumDHJ01 | Pyrginae  | 02-SRNP-14094   | XAA770-04      | DQ291928          |
| 8087       | Bungalotis quadratumDHJ01 | Pyrginae  | 02-SRNP-14599   | XAA778-04      | DQ291931          |
| 8088       | Bungalotis quadratumDHJ01 | Pyrginae  | 02-SRNP-5850    | XAA786-04      | DQ291934          |
| 8089       | Bungalotis quadratumDHJ01 | Pyrginae  | 08-SRNP-959     | MHMWX096-09    | JF753754          |
| 8090       | Bungalotis quadratumDHJ01 | Pyrginae  | 08-SRNP-40212   | MHMWX139-09    | JF753768          |
| 8091       | Bungalotis quadratumDHJ01 | Pyrginae  | 09-SRNP-20809   | MHMYG2455-10   | HM885881          |
| 8092       | Bungalotis astylos        | Pyrginae  | 04-SRNP-23054   | MHAHD882-05    | GU161299          |
| 8093       | Bungalotis astylos        | Pyrginae  | 05-SRNP-3123    | MHAHF563-06    | GU150265          |
| 8094       | Bungalotis astylos        | Pyrginae  | 07-SRNP-32268   | MHMXXK072-07   | JF761692          |
| 8095       | Bungalotis astylos        | Pyrginae  | 06-SRNP-55070   | MHAHG140-06    | GU151213          |
| 8096       | Bungalotis astylos        | Pyrginae  | 04-SRNP-48647   | MHAHD881-05    | GU161298          |
| 8097       | Bungalotis astylos        | Pyrginae  | 07-SRNP-31525   | MHAHL523-07    | JF761684          |
| 8098       | Bungalotis astylos        | Pyrginae  | 07-SRNP-40972   | MHAHL524-07    | JF761685          |
| 8099       | Bungalotis astylos        | Pyrginae  | 07-SRNP-2056    | MHAHL538-07    | JF761686          |
| 8100       | Bungalotis astylos        | Pyrginae  | 07-SRNP-42318   | MHMXXO897-08   | JF761691          |
| 8101       | Bungalotis astylos        | Pyrginae  | 07-SRNP-33568   | MHMXT235-08    | JF761687          |
| 8102       | Bungalotis astylos        | Pyrginae  | 06-SRNP-57444   | MHAHJ907-07    | JF752490          |
| 8103       | Bungalotis astylos        | Pyrginae  | 06-SRNP-59176   | MHAHK191-07    | JF760457          |
| 8104       | Bungalotis astylos        | Pyrginae  | 06-SRNP-43639   | MHAHJ908-07    | JF752491          |
| 8105       | Bungalotis astylos        | Pyrginae  | 06-SRNP-33017   | MHAHI509-06    | GU155843          |
| 8106       | Bungalotis astylos        | Pyrginae  | 07-SRNP-57567   | MHMXXO902-08   | JF761688          |
| 8107       | Bungalotis astylos        | Pyrginae  | 07-SRNP-57566   | MHMXXO901-08   | JF761689          |
| 8108       | Bungalotis astylos        | Pyrginae  | 05-SRNP-3124    | MHAHF541-06    | GU150264          |
| 8109       | Bungalotis astylos        | Pyrginae  | 06-SRNP-58700   | MHAHK189-07    | JF760455          |
| 8110       | Bungalotis astylos        | Pyrginae  | 01-SRNP-1961    | CSCR044-04     | DQ291909          |
| 8111       | Bungalotis astylos        | Pyrginae  | 07-SRNP-57565   | MHMXXO899-08   | JF761690          |
| 8112       | Bungalotis astylos        | Pyrginae  | 09-SRNP-31141   | MHMYC536-09    | GU649804          |
| 8113       | Bungalotis astylos        | Pyrginae  | 05-SRNP-66563   | MHAHG139-06    | GU151212          |
| 8114       | Bungalotis astylos        | Pyrginae  | 06-SRNP-59177   | MHAHK190-07    | JF760456          |
| 8115       | Bungalotis astylos        | Pyrginae  | 96-SRNP-11379   | CSCR043-04     | DQ291908          |
| 8116       | Bungalotis astylos        | Pyrginae  | 09-SRNP-1890    | MHMYE1445-09   | GU653552          |
| 8117       | Bungalotis midas          | Pyrginae  | 03-SRNP-12881.1 | CSCR317-04     | DQ291916          |
| 8118       | Bungalotis midas          | Pyrginae  | 06-SRNP-43436   | MHAHJ521-07    | JF752492          |
| 8119       | Bungalotis midas          | Pyrginae  | 03-SRNP-9076    | CSCR318-04     | DQ291917          |

| <b>Tree Order</b> | <b>Species</b>       | <b>Subfamily</b> | <b>ACG Sampleid</b> | <b>BOLD Processid</b> | <b>Genbank Accession</b> |
|-------------------|----------------------|------------------|---------------------|-----------------------|--------------------------|
| 8120              | Bungalotis midas     | Pyrginae         | 05-SRNP-4908        | MHAHF564-06           | GU150271                 |
| 8121              | Bungalotis midas     | Pyrginae         | 03-SRNP-15139       | CSCR316-04            | DQ291915                 |
| 8122              | Bungalotis midas     | Pyrginae         | 94-SRNP-308         | CSCR047-04            | DQ291914                 |
| 8123              | Bungalotis midas     | Pyrginae         | 03-SRNP-9194        | CSCR319-04            | DQ291918                 |
| 8124              | Bungalotis midas     | Pyrginae         | 03-SRNP-34185       | CSCR482-04            | DQ291919                 |
| 8125              | Bungalotis midas     | Pyrginae         | 05-SRNP-4469        | MHAHE585-06           | GU149450                 |
| 8126              | Bungalotis midas     | Pyrginae         | 06-SRNP-21109       | MHAHH435-06           | GU155208                 |
| 8127              | Bungalotis midas     | Pyrginae         | 07-SRNP-40390       | MHMXX071-07           | JF761706                 |
| 8128              | Bungalotis midas     | Pyrginae         | 09-SRNP-44040       | MHMYE1446-09          | GU653549                 |
| 8129              | Bungalotis midas     | Pyrginae         | 09-SRNP-20274       | MHMYG2456-10          | HM885882                 |
| 8130              | Bungalotis diophorus | Pyrginae         | 06-SRNP-1016        | MHAHG141-06           | GU151214                 |
| 8131              | Bungalotis diophorus | Pyrginae         | 05-SRNP-24718       | MHAHI678-06           | GU155844                 |
| 8132              | Bungalotis diophorus | Pyrginae         | 07-SRNP-3318        | MHMXX0908-08          | JF761697                 |
| 8133              | Bungalotis diophorus | Pyrginae         | 07-SRNP-3315        | MHMXX0909-08          | JF761696                 |
| 8134              | Bungalotis diophorus | Pyrginae         | 08-SRNP-70990       | MHMXX677-09           | JF777708                 |
| 8135              | Bungalotis diophorus | Pyrginae         | 04-SRNP-34119       | MHAHE335-05           | GU149443                 |
| 8136              | Bungalotis diophorus | Pyrginae         | 04-SRNP-56177       | MHAHF539-06           | GU150266                 |
| 8137              | Bungalotis diophorus | Pyrginae         | 08-SRNP-70423       | MHMXX679-09           | JF777710                 |
| 8138              | Bungalotis diophorus | Pyrginae         | 08-SRNP-65707       | MHMXX002-09           | GU665265                 |
| 8139              | Bungalotis diophorus | Pyrginae         | 03-SRNP-1854        | CSCR314-04            | DQ291910                 |
| 8140              | Bungalotis diophorus | Pyrginae         | 03-SRNP-10878       | CSCR315-04            | DQ291911                 |
| 8141              | Bungalotis diophorus | Pyrginae         | 04-SRNP-34165       | MHAHE319-05           | GU149440                 |
| 8142              | Bungalotis diophorus | Pyrginae         | 04-SRNP-34027       | MHAHE336-05           | GU149441                 |
| 8143              | Bungalotis diophorus | Pyrginae         | 04-SRNP-33359       | MHAHE337-05           | GU149439                 |
| 8144              | Bungalotis diophorus | Pyrginae         | 04-SRNP-33198       | MHAHE338-05           | GU149442                 |
| 8145              | Bungalotis diophorus | Pyrginae         | 05-SRNP-21655       | MHAHF538-06           | GU150267                 |
| 8146              | Bungalotis diophorus | Pyrginae         | 05-SRNP-34150       | MHAHI687-06           | GU155845                 |
| 8147              | Bungalotis diophorus | Pyrginae         | 07-SRNP-65195       | MHAHL545-07           | JF761693                 |
| 8148              | Bungalotis diophorus | Pyrginae         | 07-SRNP-3311        | MHMXX0890-08          | JF761698                 |
| 8149              | Bungalotis diophorus | Pyrginae         | 07-SRNP-23801       | MHMXX748-08           | JF761695                 |
| 8150              | Bungalotis diophorus | Pyrginae         | 07-SRNP-23522       | MHMXX226-08           | JF761694                 |
| 8151              | Bungalotis diophorus | Pyrginae         | 08-SRNP-70422       | MHMXX124-09           | JF753726                 |
| 8152              | Bungalotis diophorus | Pyrginae         | 08-SRNP-70986       | MHMXX678-09           | JF777709                 |
| 8153              | Bungalotis diophorus | Pyrginae         | 08-SRNP-71152       | MHMXX680-09           | JF777711                 |
| 8154              | Bungalotis diophorus | Pyrginae         | 09-SRNP-22402       | MHMYG2457-10          | HM885883                 |
| 8155              | Nascus paullinae     | Pyrginae         | 08-SRNP-5198        | MHMXX673-09           | JF778116                 |
| 8156              | Nascus paullinae     | Pyrginae         | 08-SRNP-5133        | MHMXX672-09           | JF778115                 |
| 8157              | Nascus paullinae     | Pyrginae         | 99-SRNP-15218       | CSCR145-04            | DQ292702                 |
| 8158              | Nascus paullinae     | Pyrginae         | 04-SRNP-55249       | MHAHC629-05           | DQ292708                 |
| 8159              | Nascus paullinae     | Pyrginae         | 06-SRNP-7877        | MHAHJ676-07           | JF752939                 |
| 8160              | Nascus paullinae     | Pyrginae         | 05-SRNP-42441       | MHAHF205-06           | GU150583                 |
| 8161              | Nascus paullinae     | Pyrginae         | 05-SRNP-5420        | MHAHF204-06           | GU150584                 |
| 8162              | Nascus paullinae     | Pyrginae         | 05-SRNP-888         | MHAHF190-06           | GU150586                 |
| 8163              | Nascus paullinae     | Pyrginae         | 04-SRNP-14706       | MHAHC645-05           | DQ292712                 |
| 8164              | Nascus paullinae     | Pyrginae         | 04-SRNP-34021       | MHAHC642-05           | DQ292711                 |
| 8165              | Nascus paullinae     | Pyrginae         | 04-SRNP-34682       | MHAHC635-05           | DQ292710                 |
| 8166              | Nascus paullinae     | Pyrginae         | 04-SRNP-14655       | MHAHC634-05           | DQ292709                 |
| 8167              | Nascus paullinae     | Pyrginae         | 04-SRNP-55654       | MHAHC625-05           | DQ292707                 |
| 8168              | Nascus paullinae     | Pyrginae         | 04-SRNP-55794       | MHAHC615-05           | DQ292706                 |
| 8169              | Nascus paullinae     | Pyrginae         | 04-SRNP-55367       | MHAHC614-05           | DQ292705                 |
| 8170              | Nascus paullinae     | Pyrginae         | 04-SRNP-55964       | MHAHC613-05           | DQ292704                 |
| 8171              | Nascus paullinae     | Pyrginae         | 02-SRNP-6701        | CSRII529-04           | DQ292703                 |
| 8172              | Nascus paullinae     | Pyrginae         | 95-SRNP-9964        | CSCR144-04            | DQ292701                 |
| 8173              | Nascus paullinae     | Pyrginae         | 05-SRNP-45154       | MHAHF189-06           | GU150585                 |
| 8174              | Nascus paullinae     | Pyrginae         | 08-SRNP-481         | MHMXX964-09           | JF778117                 |
| 8175              | Nascus paullinae     | Pyrginae         | 04-SRNP-14559       | MHMXX1079-09          | GU666461                 |

| <b>Tree Order</b> | <b>Species</b>         | <b>Subfamily</b> | <b>ACG Sampleid</b> | <b>BOLD Processid</b> | <b>Genbank Accession</b> |
|-------------------|------------------------|------------------|---------------------|-----------------------|--------------------------|
| 8176              | Nicephellus nicephorus | Eudaminae        | 02-SRNP-27688       | CSCR091-04            | DQ292303                 |
| 8177              | Nicephellus nicephorus | Eudaminae        | 02-SRNP-27689       | CSCR092-04            | DQ292304                 |
| 8178              | Salatis canalis        | Pyrginae         | 02-SRNP-18982       | CSCR233-04            | DQ293242                 |
| 8179              | Salatis canalis        | Pyrginae         | 05-SRNP-3157        | MHAHF522-06           | GU150766                 |
| 8180              | Salatis canalis        | Pyrginae         | 08-SRNP-70373       | MHMXW128-09           | JF754148                 |
| 8181              | Salatis canalis        | Pyrginae         | 08-SRNP-70839       | MHMXW122-09           | JF754147                 |
| 8182              | Salatis canalis        | Pyrginae         | 08-SRNP-20448       | MHMXW117-09           | JF754146                 |
| 8183              | Salatis canalis        | Pyrginae         | 07-SRNP-65776       | MHMXT229-08           | JF762805                 |
| 8184              | Salatis canalis        | Pyrginae         | 08-SRNP-287         | MHMXT221-08           | JF762806                 |
| 8185              | Salatis canalis        | Pyrginae         | 06-SRNP-9549        | MHMXH842-07           | JF761154                 |
| 8186              | Salatis canalis        | Pyrginae         | 06-SRNP-44103       | MHAHJ519-07           | JF753136                 |
| 8187              | Salatis canalis        | Pyrginae         | 05-SRNP-1100        | MHAHF520-06           | GU150765                 |
| 8188              | Salatis canalis        | Pyrginae         | 04-SRNP-60727       | MHAHE321-05           | GU149919                 |
| 8189              | Salatis canalis        | Pyrginae         | 04-SRNP-1838        | MHAHE320-05           | GU149920                 |
| 8190              | Salatis canalis        | Pyrginae         | 03-SRNP-1802        | CSRII220-04           | DQ293245                 |
| 8191              | Salatis canalis        | Pyrginae         | 03-SRNP-35001       | CSRII222-04           | DQ293247                 |
| 8192              | Salatis canalis        | Pyrginae         | 02-SRNP-18867       | CSCR232-04            | DQ293241                 |
| 8193              | Salatis canalis        | Pyrginae         | 02-SRNP-19694       | CSRII219-04           | DQ293244                 |
| 8194              | Salatis canalis        | Pyrginae         | 05-SRNP-1017        | MHAHF521-06           | GU150764                 |
| 8195              | Salatis canalis        | Pyrginae         | 02-SRNP-3899        | CSRII218-04           | DQ293243                 |
| 8196              | Salatis canalis        | Pyrginae         | 03-SRNP-5164        | CSRII221-04           | DQ293246                 |
| 8197              | Salatis canalis        | Pyrginae         | 07-SRNP-2774        | MHMXO907-08           | JF762807                 |
| 8198              | Salatis canalis        | Pyrginae         | 08-SRNP-20447       | MHMXW146-09           | JF754149                 |
| 8199              | Salatis canalis        | Pyrginae         | 08-SRNP-71642       | MHMXX676-09           | JF778452                 |
| 8200              | Salatis canalis        | Pyrginae         | 08-SRNP-4733        | MHMXY1140-09          | GU666408                 |
| 8201              | Salatis canalis        | Pyrginae         | 09-SRNP-22934       | MHMYG2036-10          | HM885438                 |
| 8202              | Cephise aelius         | Pyrginae         | 06-SRNP-20598       | MHAHH560-06           | GU155325                 |
| 8203              | Cephise aelius         | Pyrginae         | 06-SRNP-2857        | MHAHH570-06           | GU155326                 |
| 8204              | Cephise aelius         | Pyrginae         | 06-SRNP-30466       | MHAHH559-06           | GU155327                 |
| 8205              | Cephise aelius         | Pyrginae         | 06-SRNP-12607       | MHAHG665-06           | GU151300                 |
| 8206              | Cephise aelius         | Pyrginae         | 06-SRNP-12587       | MHAHG664-06           | GU151301                 |
| 8207              | Cephise aelius         | Pyrginae         | 06-SRNP-12591       | MHAHG661-06           | GU151299                 |
| 8208              | Cephise aelius         | Pyrginae         | 05-SRNP-55123       | MHAHE239-05           | GU149529                 |
| 8209              | Cephise aelius         | Pyrginae         | 06-SRNP-3213        | MHAHH569-06           | GU155328                 |
| 8210              | Cephise aelius         | Pyrginae         | 03-SRNP-234         | CSCR328-04            | DQ292087                 |
| 8211              | Cephise aelius         | Pyrginae         | 03-SRNP-652         | CSCR327-04            | DQ292086                 |
| 8212              | Cephise aelius         | Pyrginae         | 02-SRNP-5365        | CSCR467-04            | DQ292085                 |
| 8213              | Cephise aelius         | Pyrginae         | 02-SRNP-5356        | CSCR466-04            | DQ292084                 |
| 8214              | Cephise aelius         | Pyrginae         | 07-SRNP-55696       | MHMXK326-07           | JF761899                 |
| 8215              | Cephise aelius         | Pyrginae         | 08-SRNP-295         | MHMXW473-09           | JF753808                 |
| 8216              | Cephise aelius         | Pyrginae         | 07-SRNP-61378       | MHMXW474-09           | JF753809                 |
| 8217              | Cephise aelius         | Pyrginae         | 08-SRNP-55427       | MHMXW557-09           | JF753807                 |
| 8218              | Cephise aelius         | Pyrginae         | 09-SRNP-22247       | MHMYG2422-10          | HM885845                 |
| 8219              | Cephise nuspesezDHJ01  | Pyrginae         | 05-SRNP-30053       | MHAHL086-07           | JF761911                 |
| 8220              | Cephise nuspesezDHJ01  | Pyrginae         | 07-SRNP-30952       | MHMXN300-07           | JF761912                 |
| 8221              | Cephise nuspesezDHJ01  | Pyrginae         | 08-SRNP-20453       | MHMXW560-09           | JF753812                 |
| 8222              | Cephise nuspesezDHJ01  | Pyrginae         | 08-SRNP-20452       | MHMXW567-09           | JF753813                 |
| 8223              | Cephise nuspesezDHJ01  | Pyrginae         | 09-SRNP-68309       | MHMYG2425-10          | HM885848                 |
| 8224              | Cephise nuspesezDHJ03  | Pyrginae         | 02-SRNP-663         | CSCR470-04            | DQ292106                 |
| 8225              | Cephise nuspesezDHJ02  | Pyrginae         | 06-SRNP-59594       | MHAHK214-07           | JF760537                 |
| 8226              | Cephise nuspesezDHJ02  | Pyrginae         | 05-SRNP-40841       | MHAHL088-07           | JF761914                 |
| 8227              | Cephise nuspesezDHJ02  | Pyrginae         | 07-SRNP-58078       | MHMXO883-08           | JF761921                 |
| 8228              | Cephise nuspesezDHJ02  | Pyrginae         | 08-SRNP-2349        | MHMXX613-09           | JF777763                 |
| 8229              | Cephise nuspesezDHJ02  | Pyrginae         | 04-SRNP-21120       | MHAHD923-05           | GU161324                 |
| 8230              | Cephise nuspesezDHJ02  | Pyrginae         | 04-SRNP-41085       | MHAHD916-05           | GU161317                 |
| 8231              | Cephise nuspesezDHJ02  | Pyrginae         | 04-SRNP-56573       | MHAHD918-05           | GU161323                 |

| <b>Tree Order</b> | <b>Species</b>        | <b>Subfamily</b> | <b>ACG Sampleid</b> | <b>BOLD Processid</b> | <b>Genbank Accession</b> |
|-------------------|-----------------------|------------------|---------------------|-----------------------|--------------------------|
| 8232              | Cephise nuspesezDHJ02 | Pyrginae         | 04-SRNP-24552       | MHAHD921-05           | GU161314                 |
| 8233              | Cephise nuspesezDHJ02 | Pyrginae         | 04-SRNP-42550       | MHAHD920-05           | GU161325                 |
| 8234              | Cephise nuspesezDHJ02 | Pyrginae         | 04-SRNP-56917       | MHAHD917-05           | GU161316                 |
| 8235              | Cephise nuspesezDHJ02 | Pyrginae         | 04-SRNP-1731        | MHAHD915-05           | GU161319                 |
| 8236              | Cephise nuspesezDHJ02 | Pyrginae         | 04-SRNP-56576       | MHAHD914-05           | GU161313                 |
| 8237              | Cephise nuspesezDHJ02 | Pyrginae         | 04-SRNP-56570       | MHAHD903-05           | GU161320                 |
| 8238              | Cephise nuspesezDHJ02 | Pyrginae         | 04-SRNP-47334       | MHAHD902-05           | GU161321                 |
| 8239              | Cephise nuspesezDHJ02 | Pyrginae         | 04-SRNP-61251       | MHAHD922-05           | GU161326                 |
| 8240              | Cephise nuspesezDHJ02 | Pyrginae         | 04-SRNP-35344       | MHAHD924-05           | GU161327                 |
| 8241              | Cephise nuspesezDHJ02 | Pyrginae         | 04-SRNP-45451       | MHAHD901-05           | GU161322                 |
| 8242              | Cephise nuspesezDHJ02 | Pyrginae         | 05-SRNP-40050       | MHAHD919-05           | GU161315                 |
| 8243              | Cephise nuspesezDHJ02 | Pyrginae         | 06-SRNP-23457       | MHM XK043-07          | JF761924                 |
| 8244              | Cephise nuspesezDHJ02 | Pyrginae         | 07-SRNP-31118       | MHM XN307-07          | JF761922                 |
| 8245              | Cephise nuspesezDHJ02 | Pyrginae         | 04-SRNP-1075        | CSRII187-04           | DQ292119                 |
| 8246              | Cephise nuspesezDHJ02 | Pyrginae         | 04-SRNP-40599       | CSRII186-04           | DQ292118                 |
| 8247              | Cephise nuspesezDHJ02 | Pyrginae         | 03-SRNP-21962       | CSRII185-04           | DQ292117                 |
| 8248              | Cephise nuspesezDHJ02 | Pyrginae         | 03-SRNP-21961       | CSRII184-04           | DQ292116                 |
| 8249              | Cephise nuspesezDHJ02 | Pyrginae         | 03-SRNP-5407        | CSCR336-04            | DQ292110                 |
| 8250              | Cephise nuspesezDHJ02 | Pyrginae         | 03-SRNP-3473        | CSCR333-04            | DQ292108                 |
| 8251              | Cephise nuspesezDHJ02 | Pyrginae         | 09-SRNP-20005       | MHMYG2389-10          | HM885813                 |
| 8252              | Cephise nuspesezDHJ02 | Pyrginae         | 09-SRNP-387         | MHMYC553-09           | GU649797                 |
| 8253              | Cephise nuspesezDHJ02 | Pyrginae         | 08-SRNP-23259       | MHMYB128-09           | GU649694                 |
| 8254              | Cephise nuspesezDHJ02 | Pyrginae         | 08-SRNP-23248       | MHMXY1082-09          | GU666455                 |
| 8255              | Cephise nuspesezDHJ02 | Pyrginae         | 08-SRNP-40706       | MHM XW564-09          | JF753818                 |
| 8256              | Cephise nuspesezDHJ02 | Pyrginae         | 08-SRNP-35369       | MHM XW561-09          | JF753817                 |
| 8257              | Cephise nuspesezDHJ02 | Pyrginae         | 08-SRNP-20435       | MHM XW559-09          | JF753816                 |
| 8258              | Cephise nuspesezDHJ02 | Pyrginae         | 08-SRNP-945         | MHM XW558-09          | JF753815                 |
| 8259              | Cephise nuspesezDHJ02 | Pyrginae         | 08-SRNP-748         | MHM XW556-09          | JF753814                 |
| 8260              | Cephise nuspesezDHJ02 | Pyrginae         | 08-SRNP-40861       | MHM XW329-09          | JF753819                 |
| 8261              | Cephise nuspesezDHJ02 | Pyrginae         | 07-SRNP-58267       | MHM XP155-08          | JF761920                 |
| 8262              | Cephise nuspesezDHJ02 | Pyrginae         | 04-SRNP-61487       | MHAHL090-07           | JF761915                 |
| 8263              | Cephise nuspesezDHJ02 | Pyrginae         | 04-SRNP-48306       | MHAHD913-05           | GU161318                 |
| 8264              | Cephise nuspesezDHJ02 | Pyrginae         | 03-SRNP-5930        | CSCR338-04            | DQ292112                 |
| 8265              | Cephise nuspesezDHJ02 | Pyrginae         | 08-SRNP-655         | MHM XT138-08          | JF761919                 |
| 8266              | Cephise nuspesezDHJ02 | Pyrginae         | 02-SRNP-33859       | CSCR066-04            | DQ292107                 |
| 8267              | Cephise nuspesezDHJ02 | Pyrginae         | 03-SRNP-10602       | CSCR340-04            | DQ292114                 |
| 8268              | Cephise nuspesezDHJ02 | Pyrginae         | 05-SRNP-43495       | MHAHL093-07           | JF761916                 |
| 8269              | Cephise nuspesezDHJ02 | Pyrginae         | 07-SRNP-31639       | MHM XN304-07          | JF761923                 |
| 8270              | Cephise nuspesezDHJ02 | Pyrginae         | 00-SRNP-110         | CSRII183-04           | DQ292115                 |
| 8271              | Cephise nuspesezDHJ02 | Pyrginae         | 03-SRNP-5879        | CSCR335-04            | DQ292109                 |
| 8272              | Cephise nuspesezDHJ02 | Pyrginae         | 04-SRNP-61513       | MHAHL087-07           | JF761913                 |
| 8273              | Cephise nuspesezDHJ02 | Pyrginae         | 03-SRNP-5406        | CSCR339-04            | DQ292113                 |
| 8274              | Cephise nuspesezDHJ02 | Pyrginae         | 02-SRNP-5636        | CSCR469-04            | DQ292105                 |
| 8275              | Cephise nuspesezDHJ02 | Pyrginae         | 03-SRNP-5475        | CSCR337-04            | DQ292111                 |
| 8276              | Cephise nuspesezDHJ02 | Pyrginae         | 07-SRNP-66199       | MHM XT181-08          | JF761917                 |
| 8277              | Cephise nuspesezDHJ02 | Pyrginae         | 08-SRNP-531         | MHM XT139-08          | JF761918                 |
| 8278              | Cephise nuspesezDHJ02 | Pyrginae         | 09-SRNP-20293       | MHMYG2426-10          | HM885849                 |
| 8279              | Cephise nuspesezDHJ02 | Pyrginae         | 09-SRNP-20294       | MHMYG2427-10          | HM885850                 |
| 8280              | Cephise Burns01       | Pyrginae         | 03-SRNP-10046       | CSCR332-04            | DQ292091                 |
| 8281              | Cephise Burns01       | Pyrginae         | 06-SRNP-41883       | MHAHI157-06           | GU155895                 |
| 8282              | Cephise Burns01       | Pyrginae         | 08-SRNP-31038       | MHM XW562-09          | JF753810                 |
| 8283              | Cephise Burns01       | Pyrginae         | 09-SRNP-69829       | MHMYG2388-10          | HM885812                 |
| 8284              | Cephise Burns01       | Pyrginae         | 03-SRNP-10720       | CSCR330-04            | DQ292089                 |
| 8285              | Cephise Burns01       | Pyrginae         | 03-SRNP-10166       | CSCR331-04            | DQ292090                 |
| 8286              | Cephise Burns01       | Pyrginae         | 04-SRNP-34910       | MHAHC585-05           | DQ292101                 |
| 8287              | Cephise Burns01       | Pyrginae         | 04-SRNP-34943       | MHAHC586-05           | DQ292102                 |

| <b>Tree Order</b> | <b>Species</b>              | <b>Subfamily</b> | <b>ACG Sampleid</b> | <b>BOLD Processid</b> | <b>Genbank Accession</b> |
|-------------------|-----------------------------|------------------|---------------------|-----------------------|--------------------------|
| 8288              | Cephise Burns01             | Pyrginae         | 08-SRNP-42404       | MHMYC523-09           | HM390765                 |
| 8289              | Cephise Burns01             | Pyrginae         | 03-SRNP-21880       | CSRII181-04           | DQ292094                 |
| 8290              | Cephise Burns01             | Pyrginae         | 03-SRNP-10462       | CSCR329-04            | DQ292088                 |
| 8291              | Cephise Burns01             | Pyrginae         | 08-SRNP-24687       | MHMYB127-09           | GU649693                 |
| 8292              | Cephise Burns01             | Pyrginae         | 00-SRNP-11741       | CSCR495-04            | DQ292092                 |
| 8293              | Cephise Burns01             | Pyrginae         | 05-SRNP-24566       | MHAHL094-07           | JF761903                 |
| 8294              | Cephise Burns01             | Pyrginae         | 04-SRNP-32954       | MHAHC583-05           | DQ292099                 |
| 8295              | Cephise Burns01             | Pyrginae         | 04-SRNP-41887       | MHAHE004-05           | GU149530                 |
| 8296              | Cephise Burns01             | Pyrginae         | 06-SRNP-41095       | MHAHG678-06           | GU151302                 |
| 8297              | Cephise Burns01             | Pyrginae         | 06-SRNP-23379       | MHMXXK044-07          | JF761910                 |
| 8298              | Cephise Burns01             | Pyrginae         | 05-SRNP-33964       | MHAHL091-07           | JF761901                 |
| 8299              | Cephise Burns01             | Pyrginae         | 09-SRNP-80522       | MHMYG2424-10          | HM885847                 |
| 8300              | Cephise Burns01             | Pyrginae         | 07-SRNP-41982       | MHMXP157-08           | JF761904                 |
| 8301              | Cephise Burns01             | Pyrginae         | 03-SRNP-21881       | CSRII182-04           | DQ292095                 |
| 8302              | Cephise Burns01             | Pyrginae         | 05-SRNP-41674       | MHAHL085-07           | JF761900                 |
| 8303              | Cephise Burns01             | Pyrginae         | 05-SRNP-23773       | MHAHL092-07           | JF761902                 |
| 8304              | Cephise Burns01             | Pyrginae         | 06-SRNP-65516       | MHMXXK045-07          | JF761909                 |
| 8305              | Cephise Burns01             | Pyrginae         | 08-SRNP-40693       | MHMXXW563-09          | JF753811                 |
| 8306              | Cephise Burns01             | Pyrginae         | 09-SRNP-40285       | MHMYC519-09           | GU649821                 |
| 8307              | Cephise Burns01             | Pyrginae         | 09-SRNP-30023       | MHMYC522-09           | GU649817                 |
| 8308              | Cephise Burns01             | Pyrginae         | 09-SRNP-40454       | MHMYE1416-09          | HM424365                 |
| 8309              | Cephise Burns01             | Pyrginae         | 09-SRNP-67702       | MHMYG2386-10          | HM885810                 |
| 8310              | Cephise Burns01             | Pyrginae         | 09-SRNP-67936       | MHMYG2387-10          | HM885811                 |
| 8311              | Cephise Burns01             | Pyrginae         | 08-SRNP-72778       | MHMYC520-09           | GU649822                 |
| 8312              | Cephise Burns01             | Pyrginae         | 08-SRNP-42162       | MHMYC521-09           | GU649816                 |
| 8313              | Cephise Burns01             | Pyrginae         | 09-SRNP-69828       | MHMYG2423-10          | HM885846                 |
| 8314              | Cephise Burns01             | Pyrginae         | 07-SRNP-32126       | MHMXXN305-07          | JF761905                 |
| 8315              | Cephise Burns01             | Pyrginae         | 07-SRNP-32127       | MHMXXN302-07          | JF761906                 |
| 8316              | Cephise Burns01             | Pyrginae         | 07-SRNP-31871       | MHMXXK053-07          | JF761908                 |
| 8317              | Cephise Burns01             | Pyrginae         | 06-SRNP-41266       | MHAHH533-06           | GU155329                 |
| 8318              | Cephise Burns01             | Pyrginae         | 04-SRNP-42479       | MHAHC588-05           | DQ292104                 |
| 8319              | Cephise Burns01             | Pyrginae         | 04-SRNP-32936       | MHAHC587-05           | DQ292103                 |
| 8320              | Cephise Burns01             | Pyrginae         | 04-SRNP-55099       | MHAHC584-05           | DQ292100                 |
| 8321              | Cephise Burns01             | Pyrginae         | 04-SRNP-56368       | MHAHC582-05           | DQ292098                 |
| 8322              | Cephise Burns01             | Pyrginae         | 04-SRNP-32391       | MHAHC581-05           | DQ292097                 |
| 8323              | Cephise Burns01             | Pyrginae         | 04-SRNP-42353       | MHAHC580-05           | DQ292096                 |
| 8324              | Cephise Burns01             | Pyrginae         | 06-SRNP-34228       | MHAHJ817-07           | JF752567                 |
| 8325              | Cephise Burns01             | Pyrginae         | 07-SRNP-32173       | MHMXXN298-07          | JF761907                 |
| 8326              | Cephise Burns01             | Pyrginae         | 01-SRNP-4401        | CSRII180-04           | DQ292093                 |
| 8327              | Cephise Burns01             | Pyrginae         | 08-SRNP-24688       | MHMYB129-09           |                          |
| 8328              | Cephise Burns01             | Pyrginae         | 09-SRNP-68422       | MHMYI595-10           | HQ963910                 |
| 8329              | Dyscophellus phraxanorDHJ01 | Pyrginae         | 00-SRNP-14033       | MHAHJ118-07           | JF752647                 |
| 8330              | Dyscophellus phraxanorDHJ01 | Pyrginae         | 07-SRNP-32221       | MHAHL537-07           | JF762121                 |
| 8331              | Dyscophellus phraxanorDHJ01 | Pyrginae         | 02-SRNP-3482        | MHAHJ136-07           | JF752651                 |
| 8332              | Dyscophellus phraxanorDHJ01 | Pyrginae         | 01-SRNP-5699        | MHAHJ127-07           | JF752650                 |
| 8333              | Dyscophellus phraxanorDHJ01 | Pyrginae         | 01-SRNP-22949       | MHAHJ125-07           | JF752649                 |
| 8334              | Dyscophellus phraxanorDHJ01 | Pyrginae         | 02-SRNP-6877        | MHAHJ124-07           | JF752648                 |
| 8335              | Dyscophellus phraxanorDHJ01 | Pyrginae         | 99-SRNP-13675       | MHAHJ114-07           | JF752646                 |
| 8336              | Dyscophellus phraxanorDHJ01 | Pyrginae         | 99-SRNP-12738       | MHAHJ107-07           | JF752644                 |
| 8337              | Dyscophellus phraxanorDHJ01 | Pyrginae         | 99-SRNP-12756       | MHAHJ103-07           | JF752643                 |
| 8338              | Dyscophellus phraxanorDHJ01 | Pyrginae         | 99-SRNP-12686       | MHAHJ101-07           | JF752642                 |
| 8339              | Dyscophellus phraxanorDHJ01 | Pyrginae         | 99-SRNP-12371       | MHAHJ096-07           | JF752641                 |
| 8340              | Dyscophellus phraxanorDHJ01 | Pyrginae         | 99-SRNP-12368       | MHAHJ094-07           | JF752640                 |
| 8341              | Dyscophellus phraxanorDHJ01 | Pyrginae         | 01-SRNP-25007       | MHAHJ088-07           | JF752639                 |
| 8342              | Dyscophellus phraxanorDHJ01 | Pyrginae         | 01-SRNP-175         | MHAHJ084-07           | JF752638                 |
| 8343              | Dyscophellus phraxanorDHJ01 | Pyrginae         | 00-SRNP-14611       | MHAHJ079-07           | JF752636                 |

| Tree Order | Species                     | Subfamily | ACG Sampleid  | BOLD Processid | Genbank Accession |
|------------|-----------------------------|-----------|---------------|----------------|-------------------|
| 8344       | Dyscophellus phraxanorDHJ01 | Pyrginae  | 00-SRNP-14606 | MHAHJ078-07    | JF752635          |
| 8345       | Dyscophellus phraxanorDHJ01 | Pyrginae  | 00-SRNP-12745 | MHAHJ077-07    | JF752634          |
| 8346       | Dyscophellus phraxanorDHJ01 | Pyrginae  | 99-SRNP-5588  | MHAHJ067-07    | JF752633          |
| 8347       | Dyscophellus phraxanorDHJ01 | Pyrginae  | 01-SRNP-64    | MHAHJ063-07    | JF752632          |
| 8348       | Dyscophellus phraxanorDHJ01 | Pyrginae  | 99-SRNP-13192 | MHAHJ052-07    | JF752631          |
| 8349       | Dyscophellus phraxanorDHJ01 | Pyrginae  | 99-SRNP-13329 | MHAHJ046-07    | JF752629          |
| 8350       | Dyscophellus phraxanorDHJ01 | Pyrginae  | 98-SRNP-7943  | MHAHJ023-07    | JF752626          |
| 8351       | Dyscophellus phraxanorDHJ01 | Pyrginae  | 02-SRNP-2032  | MHAHC525-05    | DQ292352          |
| 8352       | Dyscophellus phraxanorDHJ01 | Pyrginae  | 02-SRNP-982   | MHAHC524-05    | DQ292351          |
| 8353       | Dyscophellus phraxanorDHJ01 | Pyrginae  | 02-SRNP-3712  | MHAHC519-05    | DQ292346          |
| 8354       | Dyscophellus phraxanorDHJ01 | Pyrginae  | 01-SRNP-3949  | MHAHC504-05    | DQ292331          |
| 8355       | Dyscophellus phraxanorDHJ01 | Pyrginae  | 99-SRNP-13337 | MHAHC501-05    | DQ292328          |
| 8356       | Dyscophellus phraxanorDHJ01 | Pyrginae  | 00-SRNP-4533  | MHAHC495-05    | DQ292322          |
| 8357       | Dyscophellus phraxanorDHJ01 | Pyrginae  | 01-SRNP-9094  | MHAHC493-05    | DQ292320          |
| 8358       | Dyscophellus phraxanorDHJ01 | Pyrginae  | 00-SRNP-14920 | MHAHJ082-07    | JF752637          |
| 8359       | Dyscophellus phraxanorDHJ01 | Pyrginae  | 99-SRNP-4770  | MHAHJ028-07    | JF752627          |
| 8360       | Dyscophellus phraxanorDHJ01 | Pyrginae  | 00-SRNP-22143 | CSCR095-04     | DQ292307          |
| 8361       | Dyscophellus phraxanorDHJ01 | Pyrginae  | 98-SRNP-7950  | MHAHJ018-07    | JF752625          |
| 8362       | Dyscophellus phraxanorDHJ01 | Pyrginae  | 99-SRNP-12369 | MHAHJ034-07    | JF752628          |
| 8363       | Dyscophellus phraxanorDHJ01 | Pyrginae  | 99-SRNP-13331 | MHAHJ047-07    | JF752630          |
| 8364       | Dyscophellus phraxanorDHJ01 | Pyrginae  | 99-SRNP-12797 | MHAHJ108-07    | JF752645          |
| 8365       | Dyscophellus phraxanorDHJ01 | Pyrginae  | 07-SRNP-41526 | MHAHL536-07    | JF762120          |
| 8366       | Dyscophellus phraxanorDHJ01 | Pyrginae  | 07-SRNP-41240 | MHAHL548-07    | JF762122          |
| 8367       | Dyscophellus phraxanorDHJ01 | Pyrginae  | 07-SRNP-65772 | MHMXT224-08    | JF762123          |
| 8368       | Dyscophellus phraxanorDHJ01 | Pyrginae  | 08-SRNP-65547 | MHMXX857-09    | JF777879          |
| 8369       | Dyscophellus phraxanorDHJ01 | Pyrginae  | 09-SRNP-68521 | MHMYI626-10    | HQ963940          |
| 8370       | Dyscophellus phraxanorDHJ01 | Pyrginae  | 09-SRNP-68520 | MHMYI627-10    | HQ963941          |
| 8371       | Dyscophellus phraxanorDHJ04 | Pyrginae  | 99-SRNP-12766 | MHAHJ119-07    | JF752760          |
| 8372       | Dyscophellus phraxanorDHJ04 | Pyrginae  | 00-SRNP-4233  | MHAHJ049-07    | JF752759          |
| 8373       | Dyscophellus phraxanorDHJ04 | Pyrginae  | 07-SRNP-65144 | MHAHL533-07    | JF762146          |
| 8374       | Dyscophellus phraxanorDHJ04 | Pyrginae  | 08-SRNP-70094 | MHMXX858-09    | JF777881          |
| 8375       | Dyscophellus phraxanorDHJ04 | Pyrginae  | 99-SRNP-12825 | MHAHJ120-07    | JF752761          |
| 8376       | Dyscophellus phraxanorDHJ04 | Pyrginae  | 09-SRNP-68523 | MHMYI628-10    | HQ963942          |
| 8377       | Dyscophellus phraxanorDHJ02 | Pyrginae  | 08-SRNP-66081 | MHMXXZ005-09   | GU665267          |
| 8378       | Dyscophellus phraxanorDHJ02 | Pyrginae  | 07-SRNP-65679 | MHMXT223-08    | JF762125          |
| 8379       | Dyscophellus phraxanorDHJ02 | Pyrginae  | 00-SRNP-12285 | MHAHJ076-07    | JF752710          |
| 8380       | Dyscophellus phraxanorDHJ02 | Pyrginae  | 00-SRNP-14612 | MHAHC499-05    | DQ292326          |
| 8381       | Dyscophellus phraxanorDHJ02 | Pyrginae  | 99-SRNP-12737 | MHAHJ106-07    | JF752724          |
| 8382       | Dyscophellus phraxanorDHJ02 | Pyrginae  | 99-SRNP-12807 | MHAHJ109-07    | JF752725          |
| 8383       | Dyscophellus phraxanorDHJ02 | Pyrginae  | 02-SRNP-6962  | MHAHJ129-07    | JF752736          |
| 8384       | Dyscophellus phraxanorDHJ02 | Pyrginae  | 06-SRNP-65714 | MHMXXK075-07   | JF762138          |
| 8385       | Dyscophellus phraxanorDHJ02 | Pyrginae  | 09-SRNP-67283 | MHMYE1452-09   | GU653546          |
| 8386       | Dyscophellus phraxanorDHJ03 | Pyrginae  | 07-SRNP-65163 | MHMXXO886-08   | JF762145          |
| 8387       | Dyscophellus phraxanorDHJ03 | Pyrginae  | 01-SRNP-4859  | CSRII123-04    | DQ292311          |
| 8388       | Dyscophellus phraxanorDHJ03 | Pyrginae  | 08-SRNP-7035  | MHMYC538-09    | GU649806          |
| 8389       | Dyscophellus phraxanorDHJ03 | Pyrginae  | 01-SRNP-23461 | MHAHJ135-07    | JF752758          |
| 8390       | Dyscophellus phraxanorDHJ03 | Pyrginae  | 01-SRNP-22998 | MHAHJ134-07    | JF752757          |
| 8391       | Dyscophellus phraxanorDHJ03 | Pyrginae  | 01-SRNP-23558 | MHAHC522-05    | DQ292349          |
| 8392       | Dyscophellus phraxanorDHJ03 | Pyrginae  | 01-SRNP-22434 | CSRII120-04    | DQ292308          |
| 8393       | Dyscophellus phraxanorDHJ03 | Pyrginae  | 97-SRNP-6236  | MHAHJ059-07    | JF752746          |
| 8394       | Dyscophellus phraxanorDHJ03 | Pyrginae  | 00-SRNP-14728 | MHAHJ081-07    | JF752748          |
| 8395       | Dyscophellus phraxanorDHJ03 | Pyrginae  | 07-SRNP-42162 | MHMXXO888-08   | JF762143          |
| 8396       | Dyscophellus phraxanorDHJ03 | Pyrginae  | 07-SRNP-65384 | MHMXR743-08    | JF762142          |
| 8397       | Dyscophellus phraxanorDHJ03 | Pyrginae  | 02-SRNP-2879  | MHAHJ133-07    | JF752756          |
| 8398       | Dyscophellus phraxanorDHJ03 | Pyrginae  | 07-SRNP-65189 | MHAHL534-07    | JF762140          |
| 8399       | Dyscophellus phraxanorDHJ03 | Pyrginae  | 98-SRNP-15000 | MHAHJ066-07    | JF752747          |

| <b>Tree Order</b> | <b>Species</b>              | <b>Subfamily</b> | <b>ACG Sampleid</b> | <b>BOLD Processid</b> | <b>Genbank<br/>Accession</b> |
|-------------------|-----------------------------|------------------|---------------------|-----------------------|------------------------------|
| 8400              | Dyscophellus phraxanorDHJ03 | Pyrginae         | 99-SRNP-12565       | MHAHJ041-07           | JF752745                     |
| 8401              | Dyscophellus phraxanorDHJ03 | Pyrginae         | 99-SRNP-5787        | MHAHJ029-07           | JF752744                     |
| 8402              | Dyscophellus phraxanorDHJ03 | Pyrginae         | 04-SRNP-27330       | MHAHI682-06           | GU155956                     |
| 8403              | Dyscophellus phraxanorDHJ03 | Pyrginae         | 04-SRNP-27328       | MHAHF146-06           | GU150387                     |
| 8404              | Dyscophellus phraxanorDHJ03 | Pyrginae         | 04-SRNP-34002       | MHAHE298-05           | GU149652                     |
| 8405              | Dyscophellus phraxanorDHJ03 | Pyrginae         | 99-SRNP-13498       | MHAHC513-05           | DQ292340                     |
| 8406              | Dyscophellus phraxanorDHJ02 | Pyrginae         | 99-SRNP-5485        | MHAHJ011-07           | JF752662                     |
| 8407              | Dyscophellus phraxanorDHJ02 | Pyrginae         | 98-SRNP-6815        | MHAHJ019-07           | JF752668                     |
| 8408              | Dyscophellus phraxanorDHJ02 | Pyrginae         | 99-SRNP-12566       | MHAHJ043-07           | JF752686                     |
| 8409              | Dyscophellus phraxanorDHJ02 | Pyrginae         | 01-SRNP-22109       | CSRII450-04           | DQ292316                     |
| 8410              | Dyscophellus phraxanorDHJ02 | Pyrginae         | 97-SRNP-6367        | MHAHJ003-07           | JF752654                     |
| 8411              | Dyscophellus phraxanorDHJ02 | Pyrginae         | 01-SRNP-3190        | CSRII449-04           | DQ292315                     |
| 8412              | Dyscophellus phraxanorDHJ02 | Pyrginae         | 99-SRNP-12255       | MHAHJ057-07           | JF752696                     |
| 8413              | Dyscophellus phraxanorDHJ02 | Pyrginae         | 97-SRNP-6218        | MHAHJ062-07           | JF752699                     |
| 8414              | Dyscophellus phraxanorDHJ02 | Pyrginae         | 99-SRNP-5786        | MHAHJ069-07           | JF752703                     |
| 8415              | Dyscophellus phraxanorDHJ03 | Pyrginae         | 01-SRNP-3948        | MHAHJ089-07           | JF752750                     |
| 8416              | Dyscophellus phraxanorDHJ03 | Pyrginae         | 99-SRNP-12568       | MHAHJ100-07           | JF752753                     |
| 8417              | Dyscophellus phraxanorDHJ03 | Pyrginae         | 99-SRNP-13505       | MHAHJ113-07           | JF752754                     |
| 8418              | Dyscophellus phraxanorDHJ03 | Pyrginae         | 99-SRNP-15163       | MHAHJ116-07           | JF752755                     |
| 8419              | Dyscophellus phraxanorDHJ03 | Pyrginae         | 07-SRNP-45755       | MHMXR754-08           | JF762141                     |
| 8420              | Dyscophellus phraxanorDHJ03 | Pyrginae         | 08-SRNP-31603       | MHMXW123-09           | JF753873                     |
| 8421              | Dyscophellus phraxanorDHJ03 | Pyrginae         | 07-SRNP-45264       | MHMXO887-08           | JF762144                     |
| 8422              | Dyscophellus phraxanorDHJ03 | Pyrginae         | 99-SRNP-12512       | MHAHJ099-07           | JF752752                     |
| 8423              | Dyscophellus phraxanorDHJ03 | Pyrginae         | 01-SRNP-23096       | MHAHJ092-07           | JF752751                     |
| 8424              | Dyscophellus phraxanorDHJ03 | Pyrginae         | 99-SRNP-12186       | MHAHJ014-07           | JF752742                     |
| 8425              | Dyscophellus phraxanorDHJ03 | Pyrginae         | 01-SRNP-22953       | CSRII121-04           | DQ292309                     |
| 8426              | Dyscophellus phraxanorDHJ03 | Pyrginae         | 02-SRNP-18265       | MHAHC520-05           | DQ292347                     |
| 8427              | Dyscophellus phraxanorDHJ03 | Pyrginae         | 98-SRNP-14893       | MHAHJ027-07           | JF752743                     |
| 8428              | Dyscophellus phraxanorDHJ03 | Pyrginae         | 05-SRNP-20557       | MHAHI681-06           | GU155955                     |
| 8429              | Dyscophellus phraxanorDHJ03 | Pyrginae         | 01-SRNP-9032        | MHAHJ085-07           | JF752749                     |
| 8430              | Dyscophellus phraxanorDHJ03 | Pyrginae         | 08-SRNP-32859       | MHMYC540-09           | GU649777                     |
| 8431              | Dyscophellus phraxanorDHJ02 | Pyrginae         | 08-SRNP-6169        | MHMXZ007-09           |                              |
| 8432              | Dyscophellus phraxanorDHJ02 | Pyrginae         | 00-SRNP-14734       | MHAHC506-05           | DQ292333                     |
| 8433              | Dyscophellus phraxanorDHJ02 | Pyrginae         | 99-SRNP-13462       | MHAHJ121-07           | JF752731                     |
| 8434              | Dyscophellus phraxanorDHJ02 | Pyrginae         | 01-SRNP-9165        | MHAHC510-05           | DQ292337                     |
| 8435              | Dyscophellus phraxanorDHJ02 | Pyrginae         | 99-SRNP-5874        | MHAHJ012-07           | JF752663                     |
| 8436              | Dyscophellus phraxanorDHJ02 | Pyrginae         | 02-SRNP-3484        | MHAHC523-05           | DQ292350                     |
| 8437              | Dyscophellus phraxanorDHJ02 | Pyrginae         | 00-SRNP-11848       | MHAHC508-05           | DQ292335                     |
| 8438              | Dyscophellus phraxanorDHJ02 | Pyrginae         | 00-SRNP-11388       | MHAHC500-05           | DQ292327                     |
| 8439              | Dyscophellus phraxanorDHJ02 | Pyrginae         | 99-SRNP-5875        | MHAHJ021-07           | JF752670                     |
| 8440              | Dyscophellus phraxanorDHJ02 | Pyrginae         | 00-SRNP-4333        | MHAHJ071-07           | JF752705                     |
| 8441              | Dyscophellus phraxanorDHJ02 | Pyrginae         | 99-SRNP-12489       | MHAHJ098-07           | JF752720                     |
| 8442              | Dyscophellus phraxanorDHJ02 | Pyrginae         | 00-SRNP-14680       | MHAHC496-05           | DQ292323                     |
| 8443              | Dyscophellus phraxanorDHJ02 | Pyrginae         | 01-SRNP-3501        | MHAHJ126-07           | JF752734                     |
| 8444              | Dyscophellus phraxanorDHJ02 | Pyrginae         | 07-SRNP-32987       | MHMXR742-08           | JF762132                     |
| 8445              | Dyscophellus phraxanorDHJ02 | Pyrginae         | 04-SRNP-34005       | MHAHE299-05           | GU149648                     |
| 8446              | Dyscophellus phraxanorDHJ02 | Pyrginae         | 04-SRNP-34935       | MHAHE300-05           | GU149651                     |
| 8447              | Dyscophellus phraxanorDHJ02 | Pyrginae         | 07-SRNP-32986       | MHMXR745-08           | JF762130                     |
| 8448              | Dyscophellus phraxanorDHJ02 | Pyrginae         | 98-SRNP-6943        | MHAHJ024-07           | JF752672                     |
| 8449              | Dyscophellus phraxanorDHJ02 | Pyrginae         | 02-SRNP-3485        | MHAHC529-05           | DQ292356                     |
| 8450              | Dyscophellus phraxanorDHJ02 | Pyrginae         | 02-SRNP-3481        | MHAHC528-05           | DQ292355                     |
| 8451              | Dyscophellus phraxanorDHJ02 | Pyrginae         | 99-SRNP-13135       | MHAHC517-05           | DQ292344                     |
| 8452              | Dyscophellus phraxanorDHJ02 | Pyrginae         | 00-SRNP-21015       | MHAHC507-05           | DQ292334                     |
| 8453              | Dyscophellus phraxanorDHJ02 | Pyrginae         | 00-SRNP-4194        | MHAHC505-05           | DQ292332                     |
| 8454              | Dyscophellus phraxanorDHJ02 | Pyrginae         | 01-SRNP-3303        | MHAHC498-05           | DQ292325                     |
| 8455              | Dyscophellus phraxanorDHJ02 | Pyrginae         | 01-SRNP-1559        | MHAHC494-05           | DQ292321                     |

| <b>Tree Order</b> | <b>Species</b>              | <b>Subfamily</b> | <b>ACG Sampleid</b> | <b>BOLD Processid</b> | <b>Genbank Accession</b> |
|-------------------|-----------------------------|------------------|---------------------|-----------------------|--------------------------|
| 8456              | Dyscophellus phraxanorDHJ02 | Pyrginae         | 06-SRNP-44849       | MHMXXK074-07          | JF762139                 |
| 8457              | Dyscophellus phraxanorDHJ02 | Pyrginae         | 02-SRNP-6149        | CSRII127-04           | DQ292314                 |
| 8458              | Dyscophellus phraxanorDHJ02 | Pyrginae         | 04-SRNP-23209       | MHAHE297-05           | GU149649                 |
| 8459              | Dyscophellus phraxanorDHJ02 | Pyrginae         | 01-SRNP-3381        | MHAHC521-05           | DQ292348                 |
| 8460              | Dyscophellus phraxanorDHJ02 | Pyrginae         | 01-SRNP-9118        | MHAHC503-05           | DQ292330                 |
| 8461              | Dyscophellus phraxanorDHJ02 | Pyrginae         | 01-SRNP-3519        | MHAHC491-05           | DQ292318                 |
| 8462              | Dyscophellus phraxanorDHJ02 | Pyrginae         | 97-SRNP-6945        | MHAHJ009-07           | JF752660                 |
| 8463              | Dyscophellus phraxanorDHJ02 | Pyrginae         | 01-SRNP-25126       | CSRII122-04           | DQ292310                 |
| 8464              | Dyscophellus phraxanorDHJ02 | Pyrginae         | 01-SRNP-22999       | MHAHC515-05           | DQ292342                 |
| 8465              | Dyscophellus phraxanorDHJ02 | Pyrginae         | 01-SRNP-3785        | MHAHJ055-07           | JF752694                 |
| 8466              | Dyscophellus phraxanorDHJ02 | Pyrginae         | 02-SRNP-18329       | CSRII125-04           | DQ292312                 |
| 8467              | Dyscophellus phraxanorDHJ02 | Pyrginae         | 97-SRNP-6959        | MHAHJ005-07           | JF752656                 |
| 8468              | Dyscophellus phraxanorDHJ02 | Pyrginae         | 00-SRNP-4255        | MHAHJ070-07           | JF752704                 |
| 8469              | Dyscophellus phraxanorDHJ02 | Pyrginae         | 97-SRNP-6601        | MHAHJ061-07           | JF752698                 |
| 8470              | Dyscophellus phraxanorDHJ02 | Pyrginae         | 99-SRNP-12220       | MHAHJ058-07           | JF752697                 |
| 8471              | Dyscophellus phraxanorDHJ02 | Pyrginae         | 99-SRNP-12767       | MHAHJ044-07           | JF752687                 |
| 8472              | Dyscophellus phraxanorDHJ02 | Pyrginae         | 99-SRNP-12263       | MHAHJ032-07           | JF752677                 |
| 8473              | Dyscophellus phraxanorDHJ02 | Pyrginae         | 99-SRNP-13041       | MHAHJ111-07           | JF752727                 |
| 8474              | Dyscophellus phraxanorDHJ02 | Pyrginae         | 99-SRNP-12798       | MHAHJ050-07           | JF752690                 |
| 8475              | Dyscophellus phraxanorDHJ02 | Pyrginae         | 00-SRNP-11209       | MHAHJ073-07           | JF752707                 |
| 8476              | Dyscophellus phraxanorDHJ02 | Pyrginae         | 99-SRNP-12200       | MHAHJ031-07           | JF752676                 |
| 8477              | Dyscophellus phraxanorDHJ02 | Pyrginae         | 99-SRNP-13130       | MHAHJ045-07           | JF752688                 |
| 8478              | Dyscophellus phraxanorDHJ02 | Pyrginae         | 01-SRNP-25001       | MHAHJ128-07           | JF752735                 |
| 8479              | Dyscophellus phraxanorDHJ02 | Pyrginae         | 01-SRNP-22878       | CSRII451-04           | DQ292317                 |
| 8480              | Dyscophellus phraxanorDHJ02 | Pyrginae         | 98-SRNP-6998        | MHAHJ015-07           | JF752665                 |
| 8481              | Dyscophellus phraxanorDHJ02 | Pyrginae         | 97-SRNP-6566        | MHAHJ004-07           | JF752655                 |
| 8482              | Dyscophellus phraxanorDHJ02 | Pyrginae         | 97-SRNP-6747        | MHAHJ008-07           | JF752659                 |
| 8483              | Dyscophellus phraxanorDHJ02 | Pyrginae         | 00-SRNP-4551        | MHAHJ072-07           | JF752706                 |
| 8484              | Dyscophellus phraxanorDHJ02 | Pyrginae         | 02-SRNP-3885        | MHAHJ138-07           | JF752741                 |
| 8485              | Dyscophellus phraxanorDHJ02 | Pyrginae         | 08-SRNP-65057       | MHMXT140-08           | JF762127                 |
| 8486              | Dyscophellus phraxanorDHJ02 | Pyrginae         | 08-SRNP-2144        | MHMXXW147-09          | JF753872                 |
| 8487              | Dyscophellus phraxanorDHJ02 | Pyrginae         | 01-SRNP-3380        | MHAHJ123-07           | JF752733                 |
| 8488              | Dyscophellus phraxanorDHJ02 | Pyrginae         | 01-SRNP-3900        | MHAHJ131-07           | JF752738                 |
| 8489              | Dyscophellus phraxanorDHJ02 | Pyrginae         | 01-SRNP-3947        | MHAHJ132-07           | JF752739                 |
| 8490              | Dyscophellus phraxanorDHJ02 | Pyrginae         | 07-SRNP-30937       | MHAHL535-07           | JF762124                 |
| 8491              | Dyscophellus phraxanorDHJ02 | Pyrginae         | 07-SRNP-45419       | MHMXXO884-08          | JF762137                 |
| 8492              | Dyscophellus phraxanorDHJ02 | Pyrginae         | 07-SRNP-65225       | MHMXXO906-08          | JF762133                 |
| 8493              | Dyscophellus phraxanorDHJ02 | Pyrginae         | 99-SRNP-13193       | MHAHJ112-07           | JF752728                 |
| 8494              | Dyscophellus phraxanorDHJ02 | Pyrginae         | 99-SRNP-15209       | MHAHJ122-07           | JF752732                 |
| 8495              | Dyscophellus phraxanorDHJ02 | Pyrginae         | 07-SRNP-65246       | MHMXXR744-08          | JF762131                 |
| 8496              | Dyscophellus phraxanorDHJ02 | Pyrginae         | 07-SRNP-33141       | MHMXXR746-08          | JF762129                 |
| 8497              | Dyscophellus phraxanorDHJ02 | Pyrginae         | 07-SRNP-65247       | MHMXXR747-08          | JF762128                 |
| 8498              | Dyscophellus phraxanorDHJ02 | Pyrginae         | 08-SRNP-4730        | MHMXX675-09           | JF777880                 |
| 8499              | Dyscophellus phraxanorDHJ02 | Pyrginae         | 08-SRNP-65758       | MHMXXZ004-09          | GU665266                 |
| 8500              | Dyscophellus phraxanorDHJ02 | Pyrginae         | 08-SRNP-65873       | MHMXXZ006-09          | GU665262                 |
| 8501              | Dyscophellus phraxanorDHJ02 | Pyrginae         | 99-SRNP-12518       | MHAHJ040-07           | JF752684                 |
| 8502              | Dyscophellus phraxanorDHJ02 | Pyrginae         | 99-SRNP-12486       | MHAHJ042-07           | JF752685                 |
| 8503              | Dyscophellus phraxanorDHJ02 | Pyrginae         | 98-SRNP-15081       | MHAHJ065-07           | JF752701                 |
| 8504              | Dyscophellus phraxanorDHJ02 | Pyrginae         | 00-SRNP-12297       | MHAHJ075-07           | JF752709                 |
| 8505              | Dyscophellus phraxanorDHJ02 | Pyrginae         | 01-SRNP-3326        | MHAHJ090-07           | JF752715                 |
| 8506              | Dyscophellus phraxanorDHJ02 | Pyrginae         | 99-SRNP-12366       | MHAHJ095-07           | JF752718                 |
| 8507              | Dyscophellus phraxanorDHJ02 | Pyrginae         | 99-SRNP-12485       | MHAHJ097-07           | JF752719                 |
| 8508              | Dyscophellus phraxanorDHJ02 | Pyrginae         | 99-SRNP-12722       | MHAHJ102-07           | JF752721                 |
| 8509              | Dyscophellus phraxanorDHJ02 | Pyrginae         | 99-SRNP-12705       | MHAHJ105-07           | JF752723                 |
| 8510              | Dyscophellus phraxanorDHJ02 | Pyrginae         | 99-SRNP-12881       | MHAHJ110-07           | JF752726                 |
| 8511              | Dyscophellus phraxanorDHJ02 | Pyrginae         | 99-SRNP-12370       | MHAHJ035-07           | JF752679                 |



| <b>Tree Order</b> | <b>Species</b>              | <b>Subfamily</b> | <b>ACG Sampleid</b> | <b>BOLD Processid</b> | <b>Genbank Accession</b> |
|-------------------|-----------------------------|------------------|---------------------|-----------------------|--------------------------|
| 8512              | Dyscophellus phraxanorDHJ02 | Pyrginae         | 99-SRNP-12381       | MHAHJ036-07           | JF752680                 |
| 8513              | Dyscophellus phraxanorDHJ02 | Pyrginae         | 99-SRNP-12380       | MHAHJ037-07           | JF752681                 |
| 8514              | Dyscophellus phraxanorDHJ02 | Pyrginae         | 99-SRNP-12383       | MHAHJ038-07           | JF752682                 |
| 8515              | Dyscophellus phraxanorDHJ02 | Pyrginae         | 08-SRNP-66201       | MHMYC539-09           | GU649807                 |
| 8516              | Dyscophellus phraxanorDHJ02 | Pyrginae         | 09-SRNP-56856       | MHMYE1448-09          | GU653547                 |
| 8517              | Dyscophellus phraxanorDHJ02 | Pyrginae         | 09-SRNP-57092       | MHMYE1451-09          | GU653545                 |
| 8518              | Dyscophellus phraxanorDHJ02 | Pyrginae         | 00-SRNP-22220       | MHAHJ064-07           | JF752700                 |
| 8519              | Dyscophellus phraxanorDHJ02 | Pyrginae         | 99-SRNP-12282       | MHAHJ056-07           | JF752695                 |
| 8520              | Dyscophellus phraxanorDHJ02 | Pyrginae         | 99-SRNP-12435       | MHAHJ039-07           | JF752683                 |
| 8521              | Dyscophellus phraxanorDHJ02 | Pyrginae         | 99-SRNP-4100        | MHAHJ025-07           | JF752673                 |
| 8522              | Dyscophellus phraxanorDHJ02 | Pyrginae         | 99-SRNP-4009        | MHAHJ022-07           | JF752671                 |
| 8523              | Dyscophellus phraxanorDHJ02 | Pyrginae         | 01-SRNP-22948       | MHAHC527-05           | DQ292354                 |
| 8524              | Dyscophellus phraxanorDHJ02 | Pyrginae         | 02-SRNP-18890       | MHAHC526-05           | DQ292353                 |
| 8525              | Dyscophellus phraxanorDHJ02 | Pyrginae         | 99-SRNP-13335       | MHAHC514-05           | DQ292341                 |
| 8526              | Dyscophellus phraxanorDHJ02 | Pyrginae         | 99-SRNP-13173       | MHAHC502-05           | DQ292329                 |
| 8527              | Dyscophellus phraxanorDHJ02 | Pyrginae         | 01-SRNP-1865        | MHAHC492-05           | DQ292319                 |
| 8528              | Dyscophellus phraxanorDHJ02 | Pyrginae         | 99-SRNP-4099        | CSCR094-04            | DQ292306                 |
| 8529              | Dyscophellus phraxanorDHJ02 | Pyrginae         | 00-SRNP-12748       | MHAHC509-05           | DQ292336                 |
| 8530              | Dyscophellus phraxanorDHJ02 | Pyrginae         | 02-SRNP-3831        | CSRII126-04           | DQ292313                 |
| 8531              | Dyscophellus phraxanorDHJ02 | Pyrginae         | 99-SRNP-12291       | MHAHJ033-07           | JF752678                 |
| 8532              | Dyscophellus phraxanorDHJ02 | Pyrginae         | 98-SRNP-15001       | CSCR093-04            | DQ292305                 |
| 8533              | Dyscophellus phraxanorDHJ02 | Pyrginae         | 99-SRNP-4098        | MHAHJ010-07           | JF752661                 |
| 8534              | Dyscophellus phraxanorDHJ02 | Pyrginae         | 98-SRNP-6939        | MHAHJ016-07           | JF752666                 |
| 8535              | Dyscophellus phraxanorDHJ02 | Pyrginae         | 97-SRNP-6580        | MHAHJ007-07           | JF752658                 |
| 8536              | Dyscophellus phraxanorDHJ02 | Pyrginae         | 97-SRNP-6790        | MHAHJ006-07           | JF752657                 |
| 8537              | Dyscophellus phraxanorDHJ02 | Pyrginae         | 99-SRNP-5790        | MHAHJ020-07           | JF752669                 |
| 8538              | Dyscophellus phraxanorDHJ02 | Pyrginae         | 98-SRNP-6941        | MHAHJ017-07           | JF752667                 |
| 8539              | Dyscophellus phraxanorDHJ02 | Pyrginae         | 97-SRNP-6220        | MHAHJ001-07           | JF752652                 |
| 8540              | Dyscophellus phraxanorDHJ02 | Pyrginae         | 99-SRNP-12194       | MHAHJ068-07           | JF752702                 |
| 8541              | Dyscophellus phraxanorDHJ02 | Pyrginae         | 00-SRNP-14791       | MHAHJ080-07           | JF752711                 |
| 8542              | Dyscophellus phraxanorDHJ02 | Pyrginae         | 01-SRNP-497         | MHAHJ086-07           | JF752713                 |
| 8543              | Dyscophellus phraxanorDHJ02 | Pyrginae         | 01-SRNP-9119        | MHAHJ087-07           | JF752714                 |
| 8544              | Dyscophellus phraxanorDHJ02 | Pyrginae         | 00-SRNP-21016       | MHAHJ091-07           | JF752716                 |
| 8545              | Dyscophellus phraxanorDHJ02 | Pyrginae         | 99-SRNP-12367       | MHAHJ093-07           | JF752717                 |
| 8546              | Dyscophellus phraxanorDHJ02 | Pyrginae         | 99-SRNP-12688       | MHAHJ104-07           | JF752722                 |
| 8547              | Dyscophellus phraxanorDHJ02 | Pyrginae         | 07-SRNP-45265       | MHM XO885-08          | JF762136                 |
| 8548              | Dyscophellus phraxanorDHJ02 | Pyrginae         | 07-SRNP-45263       | MHM XO889-08          | JF762135                 |
| 8549              | Dyscophellus phraxanorDHJ02 | Pyrginae         | 09-SRNP-72343       | MHMYG2452-10          | HM885878                 |
| 8550              | Dyscophellus phraxanorDHJ02 | Pyrginae         | 97-SRNP-6512        | MHAHJ002-07           | JF752653                 |
| 8551              | Dyscophellus phraxanorDHJ02 | Pyrginae         | 09-SRNP-65857       | MHMYE1447-09          | GU653550                 |
| 8552              | Dyscophellus phraxanorDHJ02 | Pyrginae         | 09-SRNP-32343       | MHMYE1449-09          | GU653548                 |
| 8553              | Dyscophellus phraxanorDHJ02 | Pyrginae         | 09-SRNP-67110       | MHMYE1450-09          | HQ992247                 |
| 8554              | Dyscophellus phraxanorDHJ02 | Pyrginae         | 09-SRNP-72763       | MHMYG2453-10          | HM885879                 |
| 8555              | Dyscophellus phraxanorDHJ02 | Pyrginae         | 07-SRNP-45964       | MHM XO905-08          | JF762134                 |
| 8556              | Dyscophellus phraxanorDHJ02 | Pyrginae         | 07-SRNP-45952       | MHM XT141-08          | JF762126                 |
| 8557              | Dyscophellus phraxanorDHJ02 | Pyrginae         | 01-SRNP-2916        | MHAHJ130-07           | JF752737                 |
| 8558              | Dyscophellus phraxanorDHJ02 | Pyrginae         | 02-SRNP-2635        | MHAHJ137-07           | JF752740                 |
| 8559              | Dyscophellus phraxanorDHJ02 | Pyrginae         | 00-SRNP-1057        | MHAHJ115-07           | JF752729                 |
| 8560              | Dyscophellus phraxanorDHJ02 | Pyrginae         | 01-SRNP-1058        | MHAHJ083-07           | JF752712                 |
| 8561              | Dyscophellus phraxanorDHJ02 | Pyrginae         | 00-SRNP-12293       | MHAHJ074-07           | JF752708                 |
| 8562              | Dyscophellus phraxanorDHJ02 | Pyrginae         | 99-SRNP-13496       | MHAHJ054-07           | JF752693                 |
| 8563              | Dyscophellus phraxanorDHJ02 | Pyrginae         | 99-SRNP-13336       | MHAHJ053-07           | JF752692                 |
| 8564              | Dyscophellus phraxanorDHJ02 | Pyrginae         | 99-SRNP-13063       | MHAHJ051-07           | JF752691                 |
| 8565              | Dyscophellus phraxanorDHJ02 | Pyrginae         | 98-SRNP-15079       | MHAHJ026-07           | JF752674                 |
| 8566              | Dyscophellus phraxanorDHJ02 | Pyrginae         | 99-SRNP-12290       | MHAHJ013-07           | JF752664                 |
| 8567              | Dyscophellus phraxanorDHJ02 | Pyrginae         | 04-SRNP-34379       | MHAHE296-05           | GU149650                 |

| Tree Order | Species                     | Subfamily | ACG Sampleid    | BOLD Processid | Genbank Accession |
|------------|-----------------------------|-----------|-----------------|----------------|-------------------|
| 8568       | Dyscophellus phraxanorDHJ02 | Pyrginae  | 02-SRNP-481     | MHAHC518-05    | DQ292345          |
| 8569       | Dyscophellus phraxanorDHJ02 | Pyrginae  | 01-SRNP-22947   | MHAHC516-05    | DQ292343          |
| 8570       | Dyscophellus phraxanorDHJ02 | Pyrginae  | 01-SRNP-23370   | MHAHC512-05    | DQ292339          |
| 8571       | Dyscophellus phraxanorDHJ02 | Pyrginae  | 01-SRNP-3488    | MHAHC511-05    | DQ292338          |
| 8572       | Dyscophellus phraxanorDHJ02 | Pyrginae  | 00-SRNP-4520    | MHAHC497-05    | DQ292324          |
| 8573       | Dyscophellus phraxanorDHJ02 | Pyrginae  | 99-SRNP-12028   | MHAHJ030-07    | JF752675          |
| 8574       | Dyscophellus phraxanorDHJ02 | Pyrginae  | 99-SRNP-13339   | MHAHJ048-07    | JF752689          |
| 8575       | Dyscophellus phraxanorDHJ02 | Pyrginae  | 00-SRNP-4195    | MHAHJ117-07    | JF752730          |
| 8576       | Dyscophellus phraxanorDHJ02 | Pyrginae  | 09-SRNP-68551   | MHMYI629-10    | HQ963943          |
| 8577       | Dyscophellus Burns02        | Pyrginae  | 05-SRNP-33035   | MHAHI680-06    | GU155954          |
| 8578       | Dyscophellus Burns02        | Pyrginae  | 04-SRNP-61423   | MHAHF542-06    | GU150385          |
| 8579       | Dyscophellus Burns02        | Pyrginae  | 00-SRNP-21086   | MHAHH149-06    | GU155365          |
| 8580       | Dyscophellus Burns02        | Pyrginae  | 98-SRNP-6071    | MHAHH151-06    | GU155359          |
| 8581       | Dyscophellus Burns02        | Pyrginae  | 08-SRNP-70869   | MHMXX688-09    | JF777877          |
| 8582       | Dyscophellus Burns02        | Pyrginae  | 06-SRNP-4389    | MHAHJ610-07    | JF752624          |
| 8583       | Dyscophellus Burns02        | Pyrginae  | 02-SRNP-6754    | MHAHH147-06    | GU155367          |
| 8584       | Dyscophellus Burns02        | Pyrginae  | 03-SRNP-12963.1 | MHAHH148-06    | GU155366          |
| 8585       | Dyscophellus Burns02        | Pyrginae  | 04-SRNP-32586   | MHAHE316-05    | GU149647          |
| 8586       | Dyscophellus Burns02        | Pyrginae  | 06-SRNP-812     | MHAHG715-06    | GU151386          |
| 8587       | Dyscophellus Burns02        | Pyrginae  | 02-SRNP-7471    | CSCR100-04     | DQ292302          |
| 8588       | Dyscophellus Burns02        | Pyrginae  | 02-SRNP-6761    | CSCR099-04     | DQ292301          |
| 8589       | Dyscophellus Burns02        | Pyrginae  | 04-SRNP-41726   | MHAHE315-05    | GU149645          |
| 8590       | Dyscophellus Burns02        | Pyrginae  | 04-SRNP-3811    | MHAHE317-05    | GU149646          |
| 8591       | Dyscophellus Burns02        | Pyrginae  | 04-SRNP-41073   | MHAHE341-05    | GU149644          |
| 8592       | Dyscophellus Burns02        | Pyrginae  | 05-SRNP-40223   | MHAHF152-06    | GU150386          |
| 8593       | Dyscophellus Burns02        | Pyrginae  | 02-SRNP-7460    | MHAHH145-06    | GU155362          |
| 8594       | Dyscophellus Burns02        | Pyrginae  | 01-SRNP-468     | MHAHH146-06    | GU155360          |
| 8595       | Dyscophellus Burns02        | Pyrginae  | 03-SRNP-11903   | MHAHH150-06    | GU155363          |
| 8596       | Dyscophellus Burns02        | Pyrginae  | 02-SRNP-7467    | MHAHH152-06    | GU155358          |
| 8597       | Dyscophellus Burns02        | Pyrginae  | 01-SRNP-5675    | MHAHH153-06    | GU155361          |
| 8598       | Dyscophellus Burns02        | Pyrginae  | 06-SRNP-40602   | MHAHH433-06    | GU155364          |
| 8599       | Dyscophellus Burns02        | Pyrginae  | 08-SRNP-70835   | MHMXX120-09    | JF753871          |
| 8600       | Dyscophellus Burns02        | Pyrginae  | 08-SRNP-65702   | MHMXX689-09    | JF777878          |
| 8601       | Dyscophellus porcius        | Pyrginae  | 01-SRNP-5603    | CSCR096-04     | DQ292357          |
| 8602       | Dyscophellus porcius        | Pyrginae  | 07-SRNP-42003   | MHMXX0893-08   | JF762147          |
| 8603       | Dyscophellus Burns01        | Pyrginae  | 08-SRNP-4491    | MHMXX685-09    | JF777873          |
| 8604       | Dyscophellus Burns01        | Pyrginae  | 08-SRNP-914     | MHMXX143-09    | JF753868          |
| 8605       | Dyscophellus Burns01        | Pyrginae  | 08-SRNP-32137   | MHMXX682-09    | JF777870          |
| 8606       | Dyscophellus Burns01        | Pyrginae  | 08-SRNP-70995   | MHMXX683-09    | JF777871          |
| 8607       | Dyscophellus Burns01        | Pyrginae  | 08-SRNP-65309   | MHMXX133-09    | JF753863          |
| 8608       | Dyscophellus Burns01        | Pyrginae  | 08-SRNP-790     | MHMXX137-09    | JF753865          |
| 8609       | Dyscophellus Burns01        | Pyrginae  | 08-SRNP-21088   | MHMXX129-09    | JF753859          |
| 8610       | Dyscophellus Burns01        | Pyrginae  | 08-SRNP-21089   | MHMXX130-09    | JF753860          |
| 8611       | Dyscophellus Burns01        | Pyrginae  | 07-SRNP-45367   | MHMXR757-08    | JF762111          |
| 8612       | Dyscophellus Burns01        | Pyrginae  | 07-SRNP-33600   | MHMXT228-08    | JF762108          |
| 8613       | Dyscophellus Burns01        | Pyrginae  | 07-SRNP-2605    | MHMXX0903-08   | JF762116          |
| 8614       | Dyscophellus Burns01        | Pyrginae  | 07-SRNP-45366   | MHMXR741-08    | JF762112          |
| 8615       | Dyscophellus Burns01        | Pyrginae  | 07-SRNP-2606    | MHAHL551-07    | JF762106          |
| 8616       | Dyscophellus Burns01        | Pyrginae  | 07-SRNP-1820    | MHAHL550-07    | JF762105          |
| 8617       | Dyscophellus Burns01        | Pyrginae  | 07-SRNP-31532   | MHAHL547-07    | JF762104          |
| 8618       | Dyscophellus Burns01        | Pyrginae  | 07-SRNP-1821    | MHAHL546-07    | JF762103          |
| 8619       | Dyscophellus Burns01        | Pyrginae  | 06-SRNP-4434    | MHAHI133-06    | GU155948          |
| 8620       | Dyscophellus Burns01        | Pyrginae  | 06-SRNP-45197   | MHAHG718-06    | GU151385          |
| 8621       | Dyscophellus Burns01        | Pyrginae  | 06-SRNP-2566    | MHAHG717-06    | GU151384          |
| 8622       | Dyscophellus Burns01        | Pyrginae  | 04-SRNP-1382    | MHAHE347-05    | GU149643          |
| 8623       | Dyscophellus Burns01        | Pyrginae  | 04-SRNP-3019    | MHAHD753-05    | GU161465          |

| <b>Tree Order</b> | <b>Species</b>       | <b>Subfamily</b> | <b>ACG Sampleid</b> | <b>BOLD Processid</b> | <b>Genbank Accession</b> |
|-------------------|----------------------|------------------|---------------------|-----------------------|--------------------------|
| 8624              | Dyscophellus Burns01 | Pyrginae         | 04-SRNP-1472        | MHAHD752-05           | GU161464                 |
| 8625              | Dyscophellus Burns01 | Pyrginae         | 04-SRNP-1145        | MHAHD750-05           | GU161462                 |
| 8626              | Dyscophellus Burns01 | Pyrginae         | 04-SRNP-41583       | MHAHD749-05           | GU161463                 |
| 8627              | Dyscophellus Burns01 | Pyrginae         | 05-SRNP-34746       | MHAHG118-06           | GU151382                 |
| 8628              | Dyscophellus Burns01 | Pyrginae         | 02-SRNP-17977       | CSRII118-04           | DQ292300                 |
| 8629              | Dyscophellus Burns01 | Pyrginae         | 03-SRNP-5975        | CSCR357-04            | DQ292296                 |
| 8630              | Dyscophellus Burns01 | Pyrginae         | 01-SRNP-1161        | CSRII116-04           | DQ292298                 |
| 8631              | Dyscophellus Burns01 | Pyrginae         | 01-SRNP-22233       | CSRII117-04           | DQ292299                 |
| 8632              | Dyscophellus Burns01 | Pyrginae         | 07-SRNP-20844       | MHAHL552-07           | JF762107                 |
| 8633              | Dyscophellus Burns01 | Pyrginae         | 08-SRNP-70860       | MHMXX734-09           | JF777876                 |
| 8634              | Dyscophellus Burns01 | Pyrginae         | 08-SRNP-21379       | MHMXW131-09           | JF753861                 |
| 8635              | Dyscophellus Burns01 | Pyrginae         | 08-SRNP-21611       | MHMXW132-09           | JF753862                 |
| 8636              | Dyscophellus Burns01 | Pyrginae         | 08-SRNP-915         | MHMXW112-09           | JF753853                 |
| 8637              | Dyscophellus Burns01 | Pyrginae         | 08-SRNP-1071        | MHMXW115-09           | JF753856                 |
| 8638              | Dyscophellus Burns01 | Pyrginae         | 08-SRNP-32136       | MHMXX684-09           | JF777872                 |
| 8639              | Dyscophellus Burns01 | Pyrginae         | 09-SRNP-57048       | MHMYE1453-09          | GU653543                 |
| 8640              | Dyscophellus Burns01 | Pyrginae         | 07-SRNP-42747       | MHMXT222-08           | JF762110                 |
| 8641              | Dyscophellus Burns01 | Pyrginae         | 09-SRNP-67513       | MHMYE1454-09          | GU653544                 |
| 8642              | Dyscophellus Burns01 | Pyrginae         | 06-SRNP-5185        | MHAHI134-06           | GU155949                 |
| 8643              | Dyscophellus Burns01 | Pyrginae         | 08-SRNP-2351        | MHMXW141-09           | JF753866                 |
| 8644              | Dyscophellus Burns01 | Pyrginae         | 08-SRNP-70059       | MHMXW134-09           | JF753864                 |
| 8645              | Dyscophellus Burns01 | Pyrginae         | 08-SRNP-1139        | MHMXW114-09           | JF753855                 |
| 8646              | Dyscophellus Burns01 | Pyrginae         | 08-SRNP-1140        | MHMXW113-09           | JF753854                 |
| 8647              | Dyscophellus Burns01 | Pyrginae         | 07-SRNP-46539       | MHMXR739-08           | JF762114                 |
| 8648              | Dyscophellus Burns01 | Pyrginae         | 07-SRNP-65613       | MHMXXO892-08          | JF762117                 |
| 8649              | Dyscophellus Burns01 | Pyrginae         | 06-SRNP-5990        | MHAHI132-06           | GU155953                 |
| 8650              | Dyscophellus Burns01 | Pyrginae         | 06-SRNP-31676       | MHAHH434-06           | GU155357                 |
| 8651              | Dyscophellus Burns01 | Pyrginae         | 06-SRNP-2371        | MHAHG716-06           | GU151383                 |
| 8652              | Dyscophellus Burns01 | Pyrginae         | 07-SRNP-45716       | MHMXR740-08           | JF762113                 |
| 8653              | Dyscophellus Burns01 | Pyrginae         | 03-SRNP-1735        | CSCR358-04            | DQ292297                 |
| 8654              | Dyscophellus Burns01 | Pyrginae         | 06-SRNP-5186        | MHAHI137-06           | GU155951                 |
| 8655              | Dyscophellus Burns01 | Pyrginae         | 08-SRNP-1423        | MHMXW144-09           | JF753869                 |
| 8656              | Dyscophellus Burns01 | Pyrginae         | 08-SRNP-1424        | MHMXW145-09           | JF753870                 |
| 8657              | Dyscophellus Burns01 | Pyrginae         | 08-SRNP-70994       | MHMXX687-09           | JF777875                 |
| 8658              | Dyscophellus Burns01 | Pyrginae         | 07-SRNP-42565       | MHMXT227-08           | JF762109                 |
| 8659              | Dyscophellus Burns01 | Pyrginae         | 08-SRNP-40847       | MHMXW142-09           | JF753867                 |
| 8660              | Dyscophellus Burns01 | Pyrginae         | 07-SRNP-3025        | MHMXXO891-08          | JF762118                 |
| 8661              | Dyscophellus Burns01 | Pyrginae         | 07-SRNP-833         | MHMXXK070-07          | JF762119                 |
| 8662              | Dyscophellus Burns01 | Pyrginae         | 06-SRNP-4432        | MHAHI136-06           | GU155950                 |
| 8663              | Dyscophellus Burns01 | Pyrginae         | 06-SRNP-4193        | MHAHI135-06           | GU155952                 |
| 8664              | Dyscophellus Burns01 | Pyrginae         | 04-SRNP-34190       | MHAHD751-05           | GU161461                 |
| 8665              | Dyscophellus Burns01 | Pyrginae         | 07-SRNP-45717       | MHMXXO904-08          | JF762115                 |
| 8666              | Dyscophellus Burns01 | Pyrginae         | 08-SRNP-1274        | MHMXW116-09           | JF753857                 |
| 8667              | Dyscophellus Burns01 | Pyrginae         | 08-SRNP-70502       | MHMXW121-09           | JF753858                 |
| 8668              | Dyscophellus Burns01 | Pyrginae         | 08-SRNP-35933       | MHMXX686-09           | JF777874                 |
| 8669              | Dyscophellus Burns01 | Pyrginae         | 09-SRNP-68136       | MHMYG2458-10          | HM885884                 |
| 8670              | Dyscophellus ramon   | Pyrginae         | 01-SRNP-3569        | MHAHH125-06           | GU155384                 |
| 8671              | Dyscophellus ramon   | Pyrginae         | 09-SRNP-40055       | MHMYC541-09           | GU649785                 |
| 8672              | Dyscophellus ramon   | Pyrginae         | 03-SRNP-5396        | CSCR359-04            | DQ292360                 |
| 8673              | Dyscophellus ramon   | Pyrginae         | 01-SRNP-25139       | MHAHH114-06           | GU155372                 |
| 8674              | Dyscophellus ramon   | Pyrginae         | 01-SRNP-1770        | MHAHH131-06           | GU155393                 |
| 8675              | Dyscophellus ramon   | Pyrginae         | 01-SRNP-22279       | MHAHH138-06           | GU155396                 |
| 8676              | Dyscophellus ramon   | Pyrginae         | 01-SRNP-5763        | MHAHH115-06           | GU155371                 |
| 8677              | Dyscophellus ramon   | Pyrginae         | 00-SRNP-12919       | MHAHH129-06           | GU155369                 |
| 8678              | Dyscophellus ramon   | Pyrginae         | 07-SRNP-60549       | MHMXR755-08           | JF762150                 |
| 8679              | Dyscophellus ramon   | Pyrginae         | 03-SRNP-5318        | CSCR360-04            | DQ292361                 |

| <b>Tree Order</b> | <b>Species</b>     | <b>Subfamily</b> | <b>ACG Sampleid</b> | <b>BOLD Processid</b> | <b>Genbank Accession</b> |
|-------------------|--------------------|------------------|---------------------|-----------------------|--------------------------|
| 8680              | Dyscophellus ramon | Pyrginae         | 01-SRNP-24190       | CSCR098-04            | DQ292359                 |
| 8681              | Dyscophellus ramon | Pyrginae         | 08-SRNP-1584        | MHMXW140-09           | JF753874                 |
| 8682              | Dyscophellus ramon | Pyrginae         | 08-SRNP-71274       | MHMYC543-09           | GU649803                 |
| 8683              | Dyscophellus ramon | Pyrginae         | 03-SRNP-30935       | MHAHH123-06           | GU155381                 |
| 8684              | Dyscophellus ramon | Pyrginae         | 02-SRNP-169         | MHAHH126-06           | GU155382                 |
| 8685              | Dyscophellus ramon | Pyrginae         | 08-SRNP-24064       | MHMYB182-09           | GU649664                 |
| 8686              | Dyscophellus ramon | Pyrginae         | 06-SRNP-370         | MHAHG117-06           | GU151387                 |
| 8687              | Dyscophellus ramon | Pyrginae         | 08-SRNP-24061       | MHMYB183-09           | GU649076                 |
| 8688              | Dyscophellus ramon | Pyrginae         | 08-SRNP-24063       | MHMYB184-09           | GU649659                 |
| 8689              | Dyscophellus ramon | Pyrginae         | 03-SRNP-30164       | MHAHH122-06           | GU155383                 |
| 8690              | Dyscophellus ramon | Pyrginae         | 00-SRNP-21755       | MHAHH124-06           | GU155385                 |
| 8691              | Dyscophellus ramon | Pyrginae         | 02-SRNP-18736       | MHAHH135-06           | GU155388                 |
| 8692              | Dyscophellus ramon | Pyrginae         | 02-SRNP-1636        | MHAHH136-06           | GU155394                 |
| 8693              | Dyscophellus ramon | Pyrginae         | 02-SRNP-4089        | MHAHH142-06           | GU155399                 |
| 8694              | Dyscophellus ramon | Pyrginae         | 07-SRNP-20011       | MHMXXK073-07          | JF762152                 |
| 8695              | Dyscophellus ramon | Pyrginae         | 05-SRNP-42006       | MHAHL038-07           | JF762148                 |
| 8696              | Dyscophellus ramon | Pyrginae         | 07-SRNP-41237       | MHAHL549-07           | JF762149                 |
| 8697              | Dyscophellus ramon | Pyrginae         | 07-SRNP-45229       | MHMXR749-08           | JF762151                 |
| 8698              | Dyscophellus ramon | Pyrginae         | 08-SRNP-4118        | MHMXX690-09           | JF777882                 |
| 8699              | Dyscophellus ramon | Pyrginae         | 02-SRNP-33929       | MHAHH140-06           | GU155389                 |
| 8700              | Dyscophellus ramon | Pyrginae         | 01-SRNP-22278       | MHAHH141-06           | GU155397                 |
| 8701              | Dyscophellus ramon | Pyrginae         | 02-SRNP-20433       | MHAHH137-06           | GU155387                 |
| 8702              | Dyscophellus ramon | Pyrginae         | 00-SRNP-22195       | MHAHH139-06           | GU155395                 |
| 8703              | Dyscophellus ramon | Pyrginae         | 02-SRNP-7461        | MHAHH132-06           | GU155392                 |
| 8704              | Dyscophellus ramon | Pyrginae         | 02-SRNP-7470        | MHAHH133-06           | GU155391                 |
| 8705              | Dyscophellus ramon | Pyrginae         | 01-SRNP-22392       | MHAHH127-06           | GU155380                 |
| 8706              | Dyscophellus ramon | Pyrginae         | 02-SRNP-3214        | MHAHH128-06           | GU155375                 |
| 8707              | Dyscophellus ramon | Pyrginae         | 01-SRNP-3012        | MHAHH121-06           | GU155376                 |
| 8708              | Dyscophellus ramon | Pyrginae         | 01-SRNP-25138       | MHAHH120-06           | GU155379                 |
| 8709              | Dyscophellus ramon | Pyrginae         | 02-SRNP-7463        | MHAHH119-06           | GU155377                 |
| 8710              | Dyscophellus ramon | Pyrginae         | 02-SRNP-7117        | MHAHH118-06           | GU155378                 |
| 8711              | Dyscophellus ramon | Pyrginae         | 00-SRNP-11389       | MHAHH117-06           | GU155368                 |
| 8712              | Dyscophellus ramon | Pyrginae         | 02-SRNP-20419       | MHAHH116-06           | GU155370                 |
| 8713              | Dyscophellus ramon | Pyrginae         | 02-SRNP-19579       | MHAHH113-06           | GU155373                 |
| 8714              | Dyscophellus ramon | Pyrginae         | 01-SRNP-22456       | MHAHH112-06           | GU155374                 |
| 8715              | Dyscophellus ramon | Pyrginae         | 06-SRNP-77          | MHAHG714-06           | GU151388                 |
| 8716              | Dyscophellus ramon | Pyrginae         | 04-SRNP-60594       | MHAHE340-05           | GU149653                 |
| 8717              | Dyscophellus ramon | Pyrginae         | 04-SRNP-3520        | MHAHE318-05           | GU149654                 |
| 8718              | Dyscophellus ramon | Pyrginae         | 03-SRNP-5316        | MHAHH130-06           | GU155386                 |
| 8719              | Dyscophellus ramon | Pyrginae         | 02-SRNP-1606        | MHAHH134-06           | GU155390                 |
| 8720              | Dyscophellus ramon | Pyrginae         | 97-SRNP-6149        | MHAHH143-06           | GU155398                 |
| 8721              | Dyscophellus ramon | Pyrginae         | 01-SRNP-11993       | CSCR097-04            | DQ292358                 |
| 8722              | Dyscophellus ramon | Pyrginae         | 08-SRNP-4781        | MHMXX691-09           | JF777883                 |
| 8723              | Dyscophellus ramon | Pyrginae         | 08-SRNP-23241       | MHMYB185-09           | GU649660                 |
| 8724              | Dyscophellus ramon | Pyrginae         | 08-SRNP-58183       | MHMYC542-09           | GU649802                 |
| 8725              | Dyscophellus ramon | Pyrginae         | 09-SRNP-67984       | MHMYG2459-10          | HM885885                 |
| 8726              | Phareas coeleste   | Pyrginae         | 02-SRNP-35232       | CSCR191-04            | DQ292970                 |
| 8727              | Phareas coeleste   | Pyrginae         | 02-SRNP-35231       | CSCR190-04            | DQ292969                 |
| 8728              | Phareas coeleste   | Pyrginae         | 04-SRNP-56226       | MHAHD859-05           | GU161783                 |
| 8729              | Phareas coeleste   | Pyrginae         | 05-SRNP-30644       | MHAHE447-05           | GU149831                 |
| 8730              | Phareas coeleste   | Pyrginae         | 05-SRNP-30576       | MHAHE448-05           | GU149829                 |
| 8731              | Phareas coeleste   | Pyrginae         | 05-SRNP-30642       | MHAHE449-05           | GU149832                 |
| 8732              | Phareas coeleste   | Pyrginae         | 05-SRNP-30469       | MHAHE450-05           | GU149833                 |
| 8733              | Phareas coeleste   | Pyrginae         | 05-SRNP-30643       | MHAHE451-05           | GU149834                 |
| 8734              | Phareas coeleste   | Pyrginae         | 05-SRNP-30577       | MHAHE452-05           | GU149830                 |
| 8735              | Phocides belus     | Pyrginae         | 06-SRNP-55175       | MHAHG339-06           | GU151551                 |

| <b>Tree Order</b> | <b>Species</b>          | <b>Subfamily</b> | <b>ACG Sampleid</b> | <b>BOLD Processid</b> | <b>Genbank Accession</b> |
|-------------------|-------------------------|------------------|---------------------|-----------------------|--------------------------|
| 8736              | Phocides belus          | Pyrginae         | 06-SRNP-55419       | MHAHG346-06           | GU151556                 |
| 8737              | Phocides belus          | Pyrginae         | 02-SRNP-10072       | CSCR193-04            | DQ292972                 |
| 8738              | Phocides belus          | Pyrginae         | 06-SRNP-55185       | MHAHG345-06           | GU151557                 |
| 8739              | Phocides belus          | Pyrginae         | 96-SRNP-51          | MHMXI722-07           | JF761008                 |
| 8740              | Phocides belus          | Pyrginae         | 01-SRNP-18748       | MHMXI717-07           | JF761015                 |
| 8741              | Phocides belus          | Pyrginae         | 96-SRNP-12439       | MHMXI719-07           | JF761001                 |
| 8742              | Phocides belus          | Pyrginae         | 96-SRNP-12538       | MHMXI720-07           | JF761012                 |
| 8743              | Phocides belus          | Pyrginae         | 96-SRNP-12436       | MHMXI721-07           | JF761010                 |
| 8744              | Phocides belus          | Pyrginae         | 07-SRNP-55324       | MHMXX151-07           | JF762597                 |
| 8745              | Phocides belus          | Pyrginae         | 07-SRNP-55469       | MHMXX156-07           | JF762594                 |
| 8746              | Phocides belus          | Pyrginae         | 06-SRNP-55343       | MHAHG342-06           | GU151553                 |
| 8747              | Phocides belus          | Pyrginae         | 01-SRNP-17031       | MHMXI710-07           | JF761011                 |
| 8748              | Phocides belus          | Pyrginae         | 07-SRNP-56444       | MHMXX157-07           | JF762593                 |
| 8749              | Phocides belus          | Pyrginae         | 96-SRNP-12539       | CSRII131-04           | DQ292974                 |
| 8750              | Phocides Warren01       | Pyrginae         | 00-SRNP-15104       | CSRII134-04           | DQ292996                 |
| 8751              | Phocides Warren01       | Pyrginae         | 00-SRNP-15731       | CSRII137-04           | DQ292999                 |
| 8752              | Phocides Warren01       | Pyrginae         | 01-SRNP-17035       | CSCR197-04            | DQ292995                 |
| 8753              | Phocides Warren01       | Pyrginae         | 00-SRNP-8936        | CSCR196-04            | DQ292994                 |
| 8754              | Phocides Warren01       | Pyrginae         | 00-SRNP-15124       | CSRII135-04           | DQ292997                 |
| 8755              | Phocides Warren01       | Pyrginae         | 00-SRNP-8940        | MHMXI700-07           | JF761029                 |
| 8756              | Phocides Warren01       | Pyrginae         | 00-SRNP-15109       | MHMXI701-07           | JF761027                 |
| 8757              | Phocides Warren01       | Pyrginae         | 00-SRNP-15096       | MHMXI702-07           | JF761024                 |
| 8758              | Phocides Warren01       | Pyrginae         | 00-SRNP-15097       | MHMXI703-07           | JF761023                 |
| 8759              | Phocides Warren01       | Pyrginae         | 00-SRNP-15177       | MHMXI705-07           | JF761037                 |
| 8760              | Phocides Warren01       | Pyrginae         | 00-SRNP-15103       | MHMXI706-07           | JF761035                 |
| 8761              | Phocides Warren01       | Pyrginae         | 01-SRNP-17848       | MHMXI708-07           | JF761030                 |
| 8762              | Phocides Warren01       | Pyrginae         | 00-SRNP-15187       | MHMXI699-07           | JF761021                 |
| 8763              | Phocides Warren01       | Pyrginae         | 00-SRNP-15115       | MHMXI698-07           | JF761041                 |
| 8764              | Phocides Warren01       | Pyrginae         | 01-SRNP-16953       | MHMXI697-07           | JF761032                 |
| 8765              | Phocides Warren01       | Pyrginae         | 00-SRNP-15106       | MHMXI696-07           | JF761034                 |
| 8766              | Phocides Warren01       | Pyrginae         | 00-SRNP-15221       | MHMXI695-07           | JF761036                 |
| 8767              | Phocides Warren01       | Pyrginae         | 00-SRNP-15114       | MHMXI693-07           | JF761022                 |
| 8768              | Phocides Warren01       | Pyrginae         | 00-SRNP-15894       | MHMXI691-07           | JF761026                 |
| 8769              | Phocides Warren01       | Pyrginae         | 00-SRNP-15110       | MHMXI690-07           | JF761028                 |
| 8770              | Phocides Warren01       | Pyrginae         | 01-SRNP-16950       | MHMXI688-07           | JF761040                 |
| 8771              | Phocides Warren01       | Pyrginae         | 00-SRNP-15186       | MHMXI687-07           | JF761031                 |
| 8772              | Phocides pigmalionDHJ01 | Pyrginae         | 95-SRNP-7824        | CSRII139-04           | DQ292984                 |
| 8773              | Phocides pigmalionDHJ01 | Pyrginae         | 00-SRNP-4542        | CSRII138-04           | DQ292983                 |
| 8774              | Phocides Warren01       | Pyrginae         | 00-SRNP-15238       | CSRII136-04           | DQ292998                 |
| 8775              | Phocides pigmalionDHJ01 | Pyrginae         | 02-SRNP-14336       | CSCR201-04            | DQ292982                 |
| 8776              | Phocides pigmalionDHJ01 | Pyrginae         | 02-SRNP-14447       | MHAHC255-05           | DQ292986                 |
| 8777              | Phocides pigmalionDHJ01 | Pyrginae         | 00-SRNP-16167       | MHAHC357-05           | DQ292987                 |
| 8778              | Phocides pigmalionDHJ01 | Pyrginae         | 96-SRNP-9016        | MHAHC358-05           | DQ292988                 |
| 8779              | Phocides pigmalionDHJ01 | Pyrginae         | 00-SRNP-4322        | MHAHC361-05           | DQ292991                 |
| 8780              | Phocides pigmalionDHJ01 | Pyrginae         | 96-SRNP-9017        | MHAHC362-05           | DQ292992                 |
| 8781              | Phocides pigmalionDHJ01 | Pyrginae         | 96-SRNP-9015        | MHAHC363-05           | DQ292993                 |
| 8782              | Phocides pigmalionDHJ01 | Pyrginae         | 04-SRNP-14106       | MHAHD738-05           | GU161784                 |
| 8783              | Phocides pigmalionDHJ01 | Pyrginae         | 05-SRNP-61368       | MHAHF591-06           | GU150691                 |
| 8784              | Phocides pigmalionDHJ01 | Pyrginae         | 07-SRNP-42344       | MHMXXO748-08          | JF762616                 |
| 8785              | Phocides pigmalionDHJ01 | Pyrginae         | 07-SRNP-42389       | MHMXXO754-08          | JF762615                 |
| 8786              | Phocides pigmalionDHJ01 | Pyrginae         | 07-SRNP-42343       | MHMXXO755-08          | JF762614                 |
| 8787              | Phocides pigmalionDHJ01 | Pyrginae         | 07-SRNP-42390       | MHMXXO758-08          | JF762613                 |
| 8788              | Phocides pigmalionDHJ01 | Pyrginae         | 08-SRNP-55462       | MHMXXW004-09          | JF754075                 |
| 8789              | Phocides pigmalionDHJ01 | Pyrginae         | 08-SRNP-5779        | MHMXY1125-09          | GU666417                 |
| 8790              | Phocides belus          | Pyrginae         | 05-SRNP-64113       | MHAHF592-06           | GU150682                 |
| 8791              | Phocides belus          | Pyrginae         | 06-SRNP-60076       | MHAHK227-07           | JF761003                 |

| <b>Tree Order</b> | <b>Species</b>          | <b>Subfamily</b> | <b>ACG Sampleid</b> | <b>BOLD Processid</b> | <b>Genbank Accession</b> |
|-------------------|-------------------------|------------------|---------------------|-----------------------|--------------------------|
| 8792              | Phocides pigmalionDHJ01 | Pyrginae         | 05-SRNP-6300        | MHAHF588-06           | GU150692                 |
| 8793              | Phocides pigmalionDHJ01 | Pyrginae         | 00-SRNP-4541        | CSCR200-04            | DQ292981                 |
| 8794              | Phocides pigmalionDHJ01 | Pyrginae         | 99-SRNP-16188       | CSRII140-04           | DQ292985                 |
| 8795              | Phocides pigmalionDHJ01 | Pyrginae         | 06-SRNP-60042       | MHAHK229-07           | JF761019                 |
| 8796              | Phocides Warren01       | Pyrginae         | 00-SRNP-15726       | MHMXI704-07           | JF761039                 |
| 8797              | Phocides belus          | Pyrginae         | 06-SRNP-59670       | MHAHK228-07           | JF761004                 |
| 8798              | Phocides belus          | Pyrginae         | 05-SRNP-66416       | MHAHG341-06           | GU151554                 |
| 8799              | Phocides belus          | Pyrginae         | 05-SRNP-66414       | MHAHG338-06           | GU151552                 |
| 8800              | Phocides belus          | Pyrginae         | 06-SRNP-55154       | MHAHG348-06           | GU151560                 |
| 8801              | Phocides belus          | Pyrginae         | 96-SRNP-12435.1     | MHMXI709-07           | JF761013                 |
| 8802              | Phocides belus          | Pyrginae         | 99-SRNP-8611        | MHMXI718-07           | JF761014                 |
| 8803              | Phocides belus          | Pyrginae         | 06-SRNP-60276       | MHAHK226-07           | JF761002                 |
| 8804              | Phocides belus          | Pyrginae         | 01-SRNP-18749       | CSCR192-04            | DQ292971                 |
| 8805              | Phocides belus          | Pyrginae         | 94-SRNP-7489        | MHMXI712-07           | JF761007                 |
| 8806              | Phocides belus          | Pyrginae         | 01-SRNP-17030       | CSRII133-04           | DQ292975                 |
| 8807              | Phocides belus          | Pyrginae         | 05-SRNP-55231       | MHAHD739-05           | GU161786                 |
| 8808              | Phocides belus          | Pyrginae         | 07-SRNP-55795       | MHM XK149-07          | JF762599                 |
| 8809              | Phocides belus          | Pyrginae         | 07-SRNP-55340       | MHM XK150-07          | JF762598                 |
| 8810              | Phocides belus          | Pyrginae         | 07-SRNP-55373       | MHM XK152-07          | JF762596                 |
| 8811              | Phocides belus          | Pyrginae         | 00-SRNP-20234       | CSRII130-04           | DQ292973                 |
| 8812              | Phocides belus          | Pyrginae         | 00-SRNP-20231       | MHM XI716-07          | JF761016                 |
| 8813              | Phocides belus          | Pyrginae         | 96-SRNP-12432       | MHM XI723-07          | JF761005                 |
| 8814              | Phocides belus          | Pyrginae         | 07-SRNP-55377       | MHM XK153-07          | JF762595                 |
| 8815              | Phocides belus          | Pyrginae         | 96-SRNP-9221        | MHM XI715-07          | JF761017                 |
| 8816              | Phocides belus          | Pyrginae         | 97-SRNP-248         | MHM XI714-07          | JF761018                 |
| 8817              | Phocides belus          | Pyrginae         | 00-SRNP-3582        | MHM XI713-07          | JF761006                 |
| 8818              | Phocides belus          | Pyrginae         | 93-SRNP-6630        | MHM XI711-07          | JF761009                 |
| 8819              | Phocides Warren01       | Pyrginae         | 00-SRNP-15102       | MHM XI707-07          | JF761033                 |
| 8820              | Phocides Warren01       | Pyrginae         | 00-SRNP-15185       | MHM XI694-07          | JF761038                 |
| 8821              | Phocides Warren01       | Pyrginae         | 00-SRNP-15194       | MHM XI692-07          | JF761025                 |
| 8822              | Phocides Warren01       | Pyrginae         | 00-SRNP-15236       | MHM XI689-07          | JF761020                 |
| 8823              | Phocides belus          | Pyrginae         | 06-SRNP-55176       | MHAHG347-06           | GU151561                 |
| 8824              | Phocides belus          | Pyrginae         | 06-SRNP-55418       | MHAHG344-06           | GU151559                 |
| 8825              | Phocides belus          | Pyrginae         | 05-SRNP-55233       | MHAHD740-05           | GU161787                 |
| 8826              | Phocides belus          | Pyrginae         | 05-SRNP-55235       | MHAHD389-05           | GU161785                 |
| 8827              | Phocides belus          | Pyrginae         | 06-SRNP-55173       | MHAHG343-06           | GU151558                 |
| 8828              | Phocides belus          | Pyrginae         | 05-SRNP-66417       | MHAHG340-06           | GU151555                 |
| 8829              | Phocides belus          | Pyrginae         | 08-SRNP-55675       | MHM XW003-09          | JF754063                 |
| 8830              | Phocides belus          | Pyrginae         | 09-SRNP-55421       | MHM YC452-09          | GU649884                 |
| 8831              | Phocides pigmalionDHJ02 | Pyrginae         | 06-SRNP-34234       | MHAHI517-06           | GU156079                 |
| 8832              | Phocides pigmalionDHJ02 | Pyrginae         | 06-SRNP-44090       | MHAHJ618-07           | JF753066                 |
| 8833              | Phocides pigmalionDHJ02 | Pyrginae         | 08-SRNP-41365       | MHM XW008-09          | JF754076                 |
| 8834              | Phocides pigmalionDHJ02 | Pyrginae         | 08-SRNP-41366       | MHM XW009-09          | JF754077                 |
| 8835              | Phocides pigmalionDHJ02 | Pyrginae         | 07-SRNP-42096       | MHM XO747-08          | JF762619                 |
| 8836              | Phocides pigmalionDHJ02 | Pyrginae         | 07-SRNP-42095       | MHM XO759-08          | JF762620                 |
| 8837              | Phocides pigmalionDHJ02 | Pyrginae         | 07-SRNP-943         | MHAHL419-07           | JF762617                 |
| 8838              | Phocides pigmalionDHJ02 | Pyrginae         | 07-SRNP-1304        | MHAHL420-07           | JF762618                 |
| 8839              | Phocides pigmalionDHJ02 | Pyrginae         | 07-SRNP-1303        | MHM XK148-07          | JF762621                 |
| 8840              | Phocides pigmalionDHJ02 | Pyrginae         | 06-SRNP-34235       | MHAHJ911-07           | JF753067                 |
| 8841              | Phocides pigmalionDHJ02 | Pyrginae         | 06-SRNP-43725       | MHAHJ614-07           | JF753065                 |
| 8842              | Phocides pigmalionDHJ02 | Pyrginae         | 06-SRNP-43751       | MHAHJ518-07           | JF753064                 |
| 8843              | Phocides pigmalionDHJ02 | Pyrginae         | 06-SRNP-34232       | MHAHI520-06           | GU156080                 |
| 8844              | Phocides pigmalionDHJ02 | Pyrginae         | 06-SRNP-34233       | MHAHI519-06           | GU156081                 |
| 8845              | Phocides pigmalionDHJ02 | Pyrginae         | 06-SRNP-41789       | MHAHI123-06           | GU156082                 |
| 8846              | Phocides pigmalionDHJ02 | Pyrginae         | 00-SRNP-11147       | MHAHC360-05           | DQ292990                 |
| 8847              | Phocides pigmalionDHJ02 | Pyrginae         | 00-SRNP-12628       | MHAHC359-05           | DQ292989                 |

| <b>Tree Order</b> | <b>Species</b>          | <b>Subfamily</b> | <b>ACG Sampleid</b> | <b>BOLD Processid</b> | <b>Genbank<br/>Accession</b> |
|-------------------|-------------------------|------------------|---------------------|-----------------------|------------------------------|
| 8848              | Phocides pigmalionDHJ02 | Pyrginae         | 08-SRNP-66135       | MHMXY1124-09          | GU666416                     |
| 8849              | Phocides pigmalionDHJ02 | Pyrginae         | 09-SRNP-21125       | MHMYH110-10           | HM887262                     |
| 8850              | Phocides Burns01        | Pyrginae         | 05-SRNP-41960       | MHAHF590-06           | GU150683                     |
| 8851              | Phocides Burns01        | Pyrginae         | 05-SRNP-2576        | MHAHE365-05           | GU149835                     |
| 8852              | Phocides Burns01        | Pyrginae         | 04-SRNP-40653       | CSRII467-04           | DQ292976                     |
| 8853              | Phocides Burns01        | Pyrginae         | 06-SRNP-42438       | MHAHI518-06           | GU156077                     |
| 8854              | Phocides Burns01        | Pyrginae         | 06-SRNP-42881       | MHAHJ616-07           | JF753051                     |
| 8855              | Phocides lilea          | Pyrginae         | 02-SRNP-4215        | CSCR194-04            | DQ292977                     |
| 8856              | Phocides lilea          | Pyrginae         | 05-SRNP-36020       | MHAHG150-06           | GU151568                     |
| 8857              | Phocides lilea          | Pyrginae         | 02-SRNP-4582        | CSCR195-04            | DQ292978                     |
| 8858              | Phocides lilea          | Pyrginae         | 07-SRNP-45148       | MHMXX143-07           | JF762603                     |
| 8859              | Phocides lilea          | Pyrginae         | 06-SRNP-55337       | MHAHG153-06           | GU151569                     |
| 8860              | Phocides lilea          | Pyrginae         | 08-SRNP-45148       | MHMXXW080-09          | JF754067                     |
| 8861              | Phocides lilea          | Pyrginae         | 08-SRNP-55012       | MHMXXW081-09          | JF754068                     |
| 8862              | Phocides lilea          | Pyrginae         | 06-SRNP-36875       | MHAHL426-07           | JF762600                     |
| 8863              | Phocides lilea          | Pyrginae         | 07-SRNP-1991        | MHAHL427-07           | JF762601                     |
| 8864              | Phocides lilea          | Pyrginae         | 05-SRNP-45014       | MHAHF853-06           | GU150689                     |
| 8865              | Phocides lilea          | Pyrginae         | 05-SRNP-45013       | MHAHF852-06           | GU150686                     |
| 8866              | Phocides lilea          | Pyrginae         | 05-SRNP-45012       | MHAHF851-06           | GU150688                     |
| 8867              | Phocides lilea          | Pyrginae         | 05-SRNP-55954       | MHAHF850-06           | GU150684                     |
| 8868              | Phocides lilea          | Pyrginae         | 05-SRNP-31874       | MHAHF849-06           | GU150685                     |
| 8869              | Phocides lilea          | Pyrginae         | 05-SRNP-42094       | MHAHF848-06           | GU150687                     |
| 8870              | Phocides lilea          | Pyrginae         | 04-SRNP-48827       | MHAHD815-05           | GU161788                     |
| 8871              | Phocides lilea          | Pyrginae         | 04-SRNP-22905       | MHAHD814-05           | GU161790                     |
| 8872              | Phocides lilea          | Pyrginae         | 04-SRNP-49744       | MHAHD813-05           | GU161789                     |
| 8873              | Phocides lilea          | Pyrginae         | 06-SRNP-55641       | MHAHG152-06           | GU151570                     |
| 8874              | Phocides lilea          | Pyrginae         | 05-SRNP-64067       | MHAHG693-06           | GU151565                     |
| 8875              | Phocides lilea          | Pyrginae         | 06-SRNP-12035       | MHAHG694-06           | GU151564                     |
| 8876              | Phocides lilea          | Pyrginae         | 05-SRNP-64081       | MHAHG695-06           | GU151563                     |
| 8877              | Phocides lilea          | Pyrginae         | 05-SRNP-64071       | MHAHG696-06           | GU151562                     |
| 8878              | Phocides lilea          | Pyrginae         | 06-SRNP-12616       | MHAHG699-06           | GU151566                     |
| 8879              | Phocides lilea          | Pyrginae         | 05-SRNP-64077       | MHAHG700-06           | GU151567                     |
| 8880              | Phocides lilea          | Pyrginae         | 07-SRNP-56871       | MHMXXO775-08          | JF762602                     |
| 8881              | Phocides lilea          | Pyrginae         | 08-SRNP-1660        | MHMXXW077-09          | JF754064                     |
| 8882              | Phocides lilea          | Pyrginae         | 08-SRNP-70870       | MHMXXW078-09          | JF754065                     |
| 8883              | Phocides lilea          | Pyrginae         | 07-SRNP-43071       | MHMXXW079-09          | JF754066                     |
| 8884              | Phocides lilea          | Pyrginae         | 08-SRNP-45036       | MHMXXW082-09          | JF754069                     |
| 8885              | Phocides lilea          | Pyrginae         | 08-SRNP-72107       | MHMXX669-09           | JF778385                     |
| 8886              | Phocides lilea          | Pyrginae         | 08-SRNP-71270       | MHMXX670-09           | JF778386                     |
| 8887              | Phocides lilea          | Pyrginae         | 08-SRNP-71658       | MHMXX671-09           | JF778387                     |
| 8888              | Phocides lilea          | Pyrginae         | 08-SRNP-72658       | MHMXY1122-09          | GU666421                     |
| 8889              | Phocides lilea          | Pyrginae         | 08-SRNP-37041       | MHMXY1123-09          | GU666422                     |
| 8890              | Phocides nigrescens     | Pyrginae         | 02-SRNP-24513       | CSCR198-04            | DQ292979                     |
| 8891              | Phocides nigrescens     | Pyrginae         | 03-SRNP-1248        | CSCR394-04            | DQ292980                     |
| 8892              | Phocides nigrescens     | Pyrginae         | 09-SRNP-20813       | MHMYH108-10           | HM887260                     |
| 8893              | Phocides nigrescens     | Pyrginae         | 06-SRNP-6937        | MHAHJ611-07           | JF753054                     |
| 8894              | Phocides nigrescens     | Pyrginae         | 06-SRNP-9777        | MHMXP223-08           | JF762611                     |
| 8895              | Phocides nigrescens     | Pyrginae         | 07-SRNP-60225       | MHMXR635-08           | JF762608                     |
| 8896              | Phocides nigrescens     | Pyrginae         | 08-SRNP-30726       | MHMXXW005-09          | JF754070                     |
| 8897              | Phocides nigrescens     | Pyrginae         | 08-SRNP-30757       | MHMXXW006-09          | JF754071                     |
| 8898              | Phocides nigrescens     | Pyrginae         | 07-SRNP-1654        | MHAHL414-07           | JF762604                     |
| 8899              | Phocides nigrescens     | Pyrginae         | 07-SRNP-1584        | MHAHL415-07           | JF762605                     |
| 8900              | Phocides nigrescens     | Pyrginae         | 07-SRNP-1585        | MHAHL421-07           | JF762606                     |
| 8901              | Phocides nigrescens     | Pyrginae         | 07-SRNP-1599        | MHAHL422-07           | JF762607                     |
| 8902              | Phocides nigrescens     | Pyrginae         | 07-SRNP-3394        | MHMXXO743-08          | JF762610                     |
| 8903              | Phocides nigrescens     | Pyrginae         | 07-SRNP-45870       | MHMXXO757-08          | JF762609                     |

| <b>Tree Order</b> | <b>Species</b>      | <b>Subfamily</b> | <b>ACG Sampleid</b> | <b>BOLD Processid</b> | <b>Genbank Accession</b> |
|-------------------|---------------------|------------------|---------------------|-----------------------|--------------------------|
| 8904              | Phocides nigrescens | Pyrginae         | 08-SRNP-1566        | MHMXW011-09           | JF754072                 |
| 8905              | Phocides nigrescens | Pyrginae         | 08-SRNP-30756       | MHMXW012-09           | JF754073                 |
| 8906              | Phocides nigrescens | Pyrginae         | 08-SRNP-2469        | MHMXX661-09           | JF778388                 |
| 8907              | Phocides nigrescens | Pyrginae         | 08-SRNP-23739       | MHMYB186-09           | GU649661                 |
| 8908              | Phocides nigrescens | Pyrginae         | 09-SRNP-20870       | MHMYH106-10           | HM887258                 |
| 8909              | Phocides nigrescens | Pyrginae         | 09-SRNP-80647       | MHMYH107-10           | HM887259                 |
| 8910              | Phocides nigrescens | Pyrginae         | 08-SRNP-33055       | MHMYC448-09           | GU649888                 |
| 8911              | Phocides nigrescens | Pyrginae         | 08-SRNP-6886        | MHMYC449-09           | GU649889                 |
| 8912              | Phocides nigrescens | Pyrginae         | 06-SRNP-4789        | MHAHJ912-07           | JF753063                 |
| 8913              | Phocides nigrescens | Pyrginae         | 07-SRNP-1656        | MHMXX154-07           | JF762612                 |
| 8914              | Phocides nigrescens | Pyrginae         | 06-SRNP-4244        | MHAHJ793-07           | JF753060                 |
| 8915              | Phocides nigrescens | Pyrginae         | 06-SRNP-6938        | MHAHJ909-07           | JF753062                 |
| 8916              | Phocides nigrescens | Pyrginae         | 06-SRNP-7174        | MHAHJ615-07           | JF753057                 |
| 8917              | Phocides nigrescens | Pyrginae         | 06-SRNP-6010        | MHAHJ792-07           | JF753059                 |
| 8918              | Phocides nigrescens | Pyrginae         | 06-SRNP-6017        | MHAHJ612-07           | JF753055                 |
| 8919              | Phocides nigrescens | Pyrginae         | 06-SRNP-6172        | MHAHJ613-07           | JF753056                 |
| 8920              | Phocides nigrescens | Pyrginae         | 06-SRNP-6612        | MHAHJ516-07           | JF753052                 |
| 8921              | Phocides nigrescens | Pyrginae         | 06-SRNP-23407       | MHAHJ517-07           | JF753053                 |
| 8922              | Phocides nigrescens | Pyrginae         | 06-SRNP-4060        | MHAHI122-06           | GU156078                 |
| 8923              | Phocides nigrescens | Pyrginae         | 05-SRNP-7497        | MHAHG684-06           | GU151571                 |
| 8924              | Phocides nigrescens | Pyrginae         | 06-SRNP-2402        | MHAHG683-06           | GU151572                 |
| 8925              | Phocides nigrescens | Pyrginae         | 05-SRNP-7669        | MHAHF589-06           | GU150690                 |
| 8926              | Phocides nigrescens | Pyrginae         | 05-SRNP-31898       | MHAHE364-05           | GU149839                 |
| 8927              | Phocides nigrescens | Pyrginae         | 05-SRNP-21431       | MHAHE363-05           | GU149838                 |
| 8928              | Phocides nigrescens | Pyrginae         | 05-SRNP-3478        | MHAHE362-05           | GU149836                 |
| 8929              | Phocides nigrescens | Pyrginae         | 05-SRNP-2553        | MHAHE361-05           | GU149837                 |
| 8930              | Phocides nigrescens | Pyrginae         | 04-SRNP-35496       | MHAHD736-05           | GU161795                 |
| 8931              | Phocides nigrescens | Pyrginae         | 04-SRNP-3410        | MHAHD735-05           | GU161791                 |
| 8932              | Phocides nigrescens | Pyrginae         | 04-SRNP-23796       | MHAHD734-05           | GU161792                 |
| 8933              | Phocides nigrescens | Pyrginae         | 04-SRNP-4780        | MHAHD733-05           | GU161793                 |
| 8934              | Phocides nigrescens | Pyrginae         | 04-SRNP-35586       | MHAHD732-05           | GU161794                 |
| 8935              | Phocides nigrescens | Pyrginae         | 06-SRNP-6936        | MHAHJ617-07           | JF753058                 |
| 8936              | Phocides nigrescens | Pyrginae         | 06-SRNP-9333        | MHAHJ794-07           | JF753061                 |
| 8937              | Phocides nigrescens | Pyrginae         | 09-SRNP-21126       | MHMYH109-10           | HM887261                 |
| 8938              | Nascus phintias     | Pyrginae         | 05-SRNP-2410        | MHAHF556-06           | GU150591                 |
| 8939              | Nascus phintias     | Pyrginae         | 07-SRNP-2575        | MHMXP145-08           | JF762417                 |
| 8940              | Nascus phintias     | Pyrginae         | 02-SRNP-3373        | CSCR147-04            | DQ292713                 |
| 8941              | Nascus phintias     | Pyrginae         | 05-SRNP-2034        | MHAHF207-06           | GU150592                 |
| 8942              | Nascus phintias     | Pyrginae         | 05-SRNP-43646       | MHAHL112-07           | JF762415                 |
| 8943              | Nascus phintias     | Pyrginae         | 07-SRNP-35296       | MHMXX069-07           | JF762418                 |
| 8944              | Nascus phintias     | Pyrginae         | 05-SRNP-47456       | MHAHF560-06           | GU150587                 |
| 8945              | Nascus phintias     | Pyrginae         | 05-SRNP-3879        | MHAHF559-06           | GU150588                 |
| 8946              | Nascus phintias     | Pyrginae         | 05-SRNP-40848       | MHAHF558-06           | GU150589                 |
| 8947              | Nascus phintias     | Pyrginae         | 05-SRNP-2532        | MHAHF557-06           | GU150590                 |
| 8948              | Nascus phintias     | Pyrginae         | 05-SRNP-2535        | MHAHF203-06           | GU150593                 |
| 8949              | Nascus phintias     | Pyrginae         | 04-SRNP-2156        | MHAHC646-05           | DQ292715                 |
| 8950              | Nascus phintias     | Pyrginae         | 02-SRNP-3469        | CSRII530-04           | DQ292714                 |
| 8951              | Nascus phintias     | Pyrginae         | 07-SRNP-36387       | MHM XR753-08          | JF762416                 |
| 8952              | Nascus phintias     | Pyrginae         | 08-SRNP-31018       | MHMXX961-09           | JF778118                 |
| 8953              | Nascus Burns01      | Pyrginae         | 04-SRNP-60540       | MHAHC612-05           | DQ292683                 |
| 8954              | Nascus Burns01      | Pyrginae         | 02-SRNP-135         | CSCR151-04            | DQ292679                 |
| 8955              | Nascus Burns01      | Pyrginae         | 00-SRNP-1575        | CSCR150-04            | DQ292678                 |
| 8956              | Nascus Burns01      | Pyrginae         | 04-SRNP-14201       | MHAHC643-05           | DQ292684                 |
| 8957              | Nascus Burns01      | Pyrginae         | 08-SRNP-14631       | MHMYH1127-09          | HM390684                 |
| 8958              | Nascus Burns01      | Pyrginae         | 05-SRNP-47006       | MHAHF212-06           | GU150581                 |
| 8959              | Nascus Burns01      | Pyrginae         | 05-SRNP-47054       | MHAHF197-06           | GU150582                 |



| <b>Tree Order</b> | <b>Species</b> | <b>Subfamily</b> | <b>ACG Sampleid</b> | <b>BOLD Processid</b> | <b>Genbank Accession</b> |
|-------------------|----------------|------------------|---------------------|-----------------------|--------------------------|
| 8960              | Nascus Burns01 | Pyrginae         | 05-SRNP-47007       | MHAHF193-06           | GU150580                 |
| 8961              | Nascus Burns01 | Pyrginae         | 98-SRNP-15119       | CSRII460-04           | DQ292681                 |
| 8962              | Nascus Burns01 | Pyrginae         | 07-SRNP-23590       | MHMXT144-08           | JF762412                 |
| 8963              | Nascus Burns01 | Pyrginae         | 04-SRNP-2064        | MHAHC647-05           | DQ292685                 |
| 8964              | Nascus Burns01 | Pyrginae         | 96-SRNP-12541       | CSRII459-04           | DQ292680                 |
| 8965              | Nascus Burns01 | Pyrginae         | 98-SRNP-15121       | CSRII461-04           | DQ292682                 |
| 8966              | Nascus Burns01 | Pyrginae         | 06-SRNP-47760       | MHAHK219-07           | JF760887                 |
| 8967              | Nascus Burns01 | Pyrginae         | 08-SRNP-6958        | MHMYC534-09           | GU649810                 |
| 8968              | Nascus Burns01 | Pyrginae         | 08-SRNP-6946        | MHMYC535-09           | GU649811                 |
| 8969              | Nascus Burns02 | Pyrginae         | 07-SRNP-45185       | MHMXXK068-07          | JF762414                 |
| 8970              | Nascus Burns02 | Pyrginae         | 02-SRNP-5385        | CSRII457-04           | DQ292688                 |
| 8971              | Nascus Burns02 | Pyrginae         | 96-SRNP-7368        | CSRII455-04           | DQ292686                 |
| 8972              | Nascus Burns02 | Pyrginae         | 02-SRNP-2085        | CSRII456-04           | DQ292687                 |
| 8973              | Nascus Burns02 | Pyrginae         | 02-SRNP-5744        | CSRII458-04           | DQ292689                 |
| 8974              | Nascus Burns02 | Pyrginae         | 04-SRNP-45037       | MHAHC620-05           | DQ292690                 |
| 8975              | Nascus Burns02 | Pyrginae         | 04-SRNP-48523       | MHAHC626-05           | DQ292691                 |
| 8976              | Nascus Burns02 | Pyrginae         | 04-SRNP-23315       | MHAHC627-05           | DQ292692                 |
| 8977              | Nascus Burns02 | Pyrginae         | 04-SRNP-21643       | MHAHC630-05           | DQ292693                 |
| 8978              | Nascus Burns02 | Pyrginae         | 04-SRNP-21927       | MHAHC633-05           | DQ292694                 |
| 8979              | Nascus Burns02 | Pyrginae         | 04-SRNP-47932       | MHAHC636-05           | DQ292695                 |
| 8980              | Nascus Burns02 | Pyrginae         | 04-SRNP-47541       | MHAHC637-05           | DQ292696                 |
| 8981              | Nascus Burns02 | Pyrginae         | 04-SRNP-48314       | MHAHC638-05           | DQ292697                 |
| 8982              | Nascus Burns02 | Pyrginae         | 04-SRNP-48044       | MHAHC639-05           | DQ292698                 |
| 8983              | Nascus Burns02 | Pyrginae         | 04-SRNP-48045       | MHAHC641-05           | DQ292699                 |
| 8984              | Nascus Burns02 | Pyrginae         | 04-SRNP-47542       | MHAHC644-05           | DQ292700                 |
| 8985              | Nascus Burns02 | Pyrginae         | 04-SRNP-11980       | MHAHD884-05           | GU161687                 |
| 8986              | Nascus Burns02 | Pyrginae         | 06-SRNP-21092       | MHAHH530-06           | GU155435                 |
| 8987              | Nascus Burns02 | Pyrginae         | 06-SRNP-3613        | MHAHI121-06           | GU156007                 |
| 8988              | Nascus Burns02 | Pyrginae         | 06-SRNP-58211       | MHAHJ520-07           | JF752938                 |
| 8989              | Nascus Burns02 | Pyrginae         | 06-SRNP-59675       | MHAHK215-07           | JF760888                 |
| 8990              | Nascus Burns02 | Pyrginae         | 06-SRNP-47830       | MHAHK216-07           | JF760889                 |
| 8991              | Nascus Burns02 | Pyrginae         | 06-SRNP-59883       | MHAHK218-07           | JF760890                 |
| 8992              | Nascus Burns02 | Pyrginae         | 06-SRNP-59658       | MHAHK220-07           | JF760891                 |
| 8993              | Nascus Burns02 | Pyrginae         | 07-SRNP-60000       | MHMXP146-08           | JF762413                 |
| 8994              | Nascus Burns02 | Pyrginae         | 08-SRNP-1817        | MHMXX962-09           | JF778114                 |
| 8995              | Nascus Burns02 | Pyrginae         | 07-SRNP-65044       | MHMXX141-09           | JF778113                 |
| 8996              | Nascus Burns02 | Pyrginae         | 08-SRNP-22926       | MHMXY1128-09          | GU666419                 |
| 8997              | Nascus Burns02 | Pyrginae         | 09-SRNP-44171       | MHMYE1520-09          | GU653486                 |
| 8998              | Nascus broteas | Pyrginae         | 07-SRNP-58744       | MHMXP144-08           | JF762408                 |
| 8999              | Nascus broteas | Pyrginae         | 07-SRNP-65708       | MHMXT179-08           | JF762404                 |
| 9000              | Nascus broteas | Pyrginae         | 07-SRNP-45315       | MHMXP143-08           | JF762409                 |
| 9001              | Nascus broteas | Pyrginae         | 07-SRNP-45363       | MHMXP142-08           | JF762410                 |
| 9002              | Nascus broteas | Pyrginae         | 07-SRNP-65709       | MHMXT143-08           | JF762405                 |
| 9003              | Nascus broteas | Pyrginae         | 07-SRNP-20402       | MHAHL115-07           | JF762402                 |
| 9004              | Nascus broteas | Pyrginae         | 07-SRNP-65689       | MHMXT142-08           | JF762406                 |
| 9005              | Nascus broteas | Pyrginae         | 05-SRNP-47047       | MHAHF195-06           | GU150578                 |
| 9006              | Nascus broteas | Pyrginae         | 08-SRNP-66188       | MHMYC533-09           | GU649809                 |
| 9007              | Nascus broteas | Pyrginae         | 09-SRNP-57232       | MHMYE1522-09          | HM391082                 |
| 9008              | Nascus broteas | Pyrginae         | 08-SRNP-66059       | MHMXY1132-09          | GU666414                 |
| 9009              | Nascus broteas | Pyrginae         | 08-SRNP-66039       | MHMXY1133-09          | GU666415                 |
| 9010              | Nascus broteas | Pyrginae         | 08-SRNP-22159       | MHMXX674-09           | JF778112                 |
| 9011              | Nascus broteas | Pyrginae         | 08-SRNP-32159       | MHMXY1129-09          | HM390685                 |
| 9012              | Nascus broteas | Pyrginae         | 07-SRNP-58175       | MHMXP147-08           | JF762407                 |
| 9013              | Nascus broteas | Pyrginae         | 07-SRNP-35984       | MHMXP224-08           | JF762411                 |
| 9014              | Nascus broteas | Pyrginae         | 09-SRNP-20230       | MHMYB187-09           | GU649662                 |
| 9015              | Nascus broteas | Pyrginae         | 08-SRNP-6161        | MHMYC532-09           | GU649808                 |

| <b>Tree Order</b> | <b>Species</b>   | <b>Subfamily</b> | <b>ACG Sampleid</b> | <b>BOLD Processid</b> | <b>Genbank<br/>Accession</b> |
|-------------------|------------------|------------------|---------------------|-----------------------|------------------------------|
| 9016              | Nascus broteas   | Pyrginae         | 08-SRNP-66029       | MHMXY1130-09          | GU666412                     |
| 9017              | Nascus broteas   | Pyrginae         | 08-SRNP-66038       | MHMXY1131-09          | GU666413                     |
| 9018              | Nascus broteas   | Pyrginae         | 07-SRNP-32448       | MHAHL113-07           | JF762401                     |
| 9019              | Nascus broteas   | Pyrginae         | 07-SRNP-36061       | MHAHL116-07           | JF762403                     |
| 9020              | Nascus broteas   | Pyrginae         | 05-SRNP-2095        | MHAHF215-06           | GU150574                     |
| 9021              | Nascus broteas   | Pyrginae         | 05-SRNP-5955        | MHAHF214-06           | GU150571                     |
| 9022              | Nascus broteas   | Pyrginae         | 05-SRNP-2780        | MHAHF210-06           | GU150577                     |
| 9023              | Nascus broteas   | Pyrginae         | 05-SRNP-3276        | MHAHF209-06           | GU150575                     |
| 9024              | Nascus broteas   | Pyrginae         | 05-SRNP-887         | MHAHF206-06           | GU150573                     |
| 9025              | Nascus broteas   | Pyrginae         | 05-SRNP-47048       | MHAHF196-06           | GU150576                     |
| 9026              | Nascus broteas   | Pyrginae         | 04-SRNP-46661       | MHAHD886-05           | GU161686                     |
| 9027              | Nascus broteas   | Pyrginae         | 03-SRNP-37108       | CSRII528-04           | DQ292677                     |
| 9028              | Nascus broteas   | Pyrginae         | 01-SRNP-7365        | CSCR143-04            | DQ292675                     |
| 9029              | Nascus broteas   | Pyrginae         | 02-SRNP-9577        | CSCR383-04            | DQ292676                     |
| 9030              | Nascus broteas   | Pyrginae         | 05-SRNP-47061       | MHAHF213-06           | GU150579                     |
| 9031              | Nascus broteas   | Pyrginae         | 05-SRNP-30597       | MHAHF217-06           | GU150572                     |
| 9032              | Nascus broteas   | Pyrginae         | 06-SRNP-1723        | MHAHG708-06           | GU151484                     |
| 9033              | Nascus broteas   | Pyrginae         | 09-SRNP-80142       | MHMYG2463-10          | HM885890                     |
| 9034              | Nascus solon     | Pyrginae         | 94-SRNP-4830        | CSCR152-04            | DQ292716                     |
| 9035              | Nascus solon     | Pyrginae         | 05-SRNP-55806       | MHAHF188-06           | GU150600                     |
| 9036              | Nascus solon     | Pyrginae         | 04-SRNP-50064       | MHAHF216-06           | GU150596                     |
| 9037              | Nascus solon     | Pyrginae         | 05-SRNP-46699       | MHAHF211-06           | GU150595                     |
| 9038              | Nascus solon     | Pyrginae         | 05-SRNP-705         | MHAHF208-06           | GU150597                     |
| 9039              | Nascus solon     | Pyrginae         | 05-SRNP-58399       | MHAHF202-06           | GU150598                     |
| 9040              | Nascus solon     | Pyrginae         | 05-SRNP-2536        | MHAHF201-06           | GU150594                     |
| 9041              | Nascus solon     | Pyrginae         | 05-SRNP-46952       | MHAHF199-06           | GU150601                     |
| 9042              | Nascus solon     | Pyrginae         | 05-SRNP-30650       | MHAHF187-06           | GU150599                     |
| 9043              | Nascus solon     | Pyrginae         | 04-SRNP-49682       | MHAHC640-05           | DQ292729                     |
| 9044              | Nascus solon     | Pyrginae         | 04-SRNP-45029       | MHAHC632-05           | DQ292728                     |
| 9045              | Nascus solon     | Pyrginae         | 04-SRNP-35293       | MHAHC631-05           | DQ292727                     |
| 9046              | Nascus solon     | Pyrginae         | 04-SRNP-49716       | MHAHC628-05           | DQ292726                     |
| 9047              | Nascus solon     | Pyrginae         | 04-SRNP-49717       | MHAHC624-05           | DQ292725                     |
| 9048              | Nascus solon     | Pyrginae         | 04-SRNP-49681       | MHAHC623-05           | DQ292724                     |
| 9049              | Nascus solon     | Pyrginae         | 04-SRNP-49777       | MHAHC621-05           | DQ292723                     |
| 9050              | Nascus solon     | Pyrginae         | 04-SRNP-49768       | MHAHC618-05           | DQ292721                     |
| 9051              | Nascus solon     | Pyrginae         | 04-SRNP-49335       | MHAHC617-05           | DQ292720                     |
| 9052              | Nascus solon     | Pyrginae         | 04-SRNP-49680       | MHAHC616-05           | DQ292719                     |
| 9053              | Nascus solon     | Pyrginae         | 02-SRNP-168         | CSRII531-04           | DQ292718                     |
| 9054              | Nascus solon     | Pyrginae         | 01-SRNP-597         | CSCR153-04            | DQ292717                     |
| 9055              | Nascus solon     | Pyrginae         | 04-SRNP-49336       | MHAHD887-05           | GU161688                     |
| 9056              | Nascus solon     | Pyrginae         | 04-SRNP-49775       | MHAHC619-05           | DQ292722                     |
| 9057              | Nascus solon     | Pyrginae         | 06-SRNP-59999       | MHAHK217-07           | JF760892                     |
| 9058              | Nascus solon     | Pyrginae         | 05-SRNP-25375       | MHAHL110-07           | JF762419                     |
| 9059              | Nascus solon     | Pyrginae         | 05-SRNP-47450       | MHAHL111-07           | JF762420                     |
| 9060              | Nascus solon     | Pyrginae         | 07-SRNP-21820       | MHAHL114-07           | JF762421                     |
| 9061              | Nascus solon     | Pyrginae         | 07-SRNP-45627       | MHM XR830-08          | JF762422                     |
| 9062              | Nascus solon     | Pyrginae         | 08-SRNP-55518       | MHMXX963-09           | JF778119                     |
| 9063              | Nascus solon     | Pyrginae         | 08-SRNP-21263       | MHMXX965-09           | JF778120                     |
| 9064              | Nascus solon     | Pyrginae         | 07-SRNP-61336       | MHMXX966-09           | JF778121                     |
| 9065              | Nascus solon     | Pyrginae         | 08-SRNP-21932       | MHMXX967-09           | JF778122                     |
| 9066              | Nascus solon     | Pyrginae         | 09-SRNP-57395       | MHMYG2464-10          | HM885891                     |
| 9067              | Drephalys alcmon | Pyrginae         | 01-SRNP-9223        | MHAHJ276-07           | JF752617                     |
| 9068              | Drephalys alcmon | Pyrginae         | 99-SRNP-2617        | CSRII113-04           | DQ292287                     |
| 9069              | Drephalys alcmon | Pyrginae         | 97-SRNP-4047        | MHAHJ273-07           | JF752614                     |
| 9070              | Drephalys alcmon | Pyrginae         | 99-SRNP-2188        | MHAHJ272-07           | JF752613                     |
| 9071              | Drephalys alcmon | Pyrginae         | 01-SRNP-9331        | CSRII112-04           | DQ292286                     |

| <b>Tree Order</b> | <b>Species</b>    | <b>Subfamily</b> | <b>ACG Sampleid</b> | <b>BOLD Processid</b> | <b>Genbank Accession</b> |
|-------------------|-------------------|------------------|---------------------|-----------------------|--------------------------|
| 9072              | Drephalys alcmon  | Pyrginae         | 97-SRNP-4150        | MHAHJ274-07           | JF752615                 |
| 9073              | Drephalys alcmon  | Pyrginae         | 02-SRNP-29274       | MHAHJ277-07           | JF752618                 |
| 9074              | Drephalys alcmon  | Pyrginae         | 02-SRNP-4202        | MHAHJ278-07           | JF752619                 |
| 9075              | Drephalys alcmon  | Pyrginae         | 99-SRNP-2646        | MHAHJ275-07           | JF752616                 |
| 9076              | Drephalys alcmon  | Pyrginae         | 98-SRNP-4184        | MHAHJ279-07           | JF752620                 |
| 9077              | Drephalys alcmon  | Pyrginae         | 00-SRNP-2692        | MHAHJ281-07           | JF752622                 |
| 9078              | Drephalys Burns01 | Pyrginae         | 05-SRNP-70289       | MHAHG144-06           | GU151380                 |
| 9079              | Drephalys Burns01 | Pyrginae         | 06-SRNP-5699        | MHAHJ820-07           | JF752623                 |
| 9080              | Drephalys Burns01 | Pyrginae         | 07-SRNP-42336       | MHMXP163-08           | JF762089                 |
| 9081              | Drephalys Burns01 | Pyrginae         | 06-SRNP-42502       | MHAHI601-06           | GU155931                 |
| 9082              | Drephalys Burns01 | Pyrginae         | 06-SRNP-42807       | MHAHI566-06           | GU155930                 |
| 9083              | Drephalys Burns01 | Pyrginae         | 05-SRNP-31284       | MHAHF595-06           | GU150383                 |
| 9084              | Drephalys Burns01 | Pyrginae         | 05-SRNP-43718       | MHAHF594-06           | GU150382                 |
| 9085              | Drephalys Burns01 | Pyrginae         | 05-SRNP-34501       | MHAHF593-06           | GU150384                 |
| 9086              | Drephalys Burns01 | Pyrginae         | 05-SRNP-41556       | MHAHE612-06           | GU149635                 |
| 9087              | Drephalys Burns01 | Pyrginae         | 05-SRNP-41680       | MHAHE611-06           | GU149636                 |
| 9088              | Drephalys Burns01 | Pyrginae         | 05-SRNP-41447       | MHAHE360-05           | GU149637                 |
| 9089              | Drephalys Burns01 | Pyrginae         | 05-SRNP-41557       | MHAHE610-06           | GU149638                 |
| 9090              | Drephalys Burns01 | Pyrginae         | 03-SRNP-21317       | CSRII194-04           | DQ292288                 |
| 9091              | Drephalys Burns01 | Pyrginae         | 06-SRNP-30793       | MHAHG145-06           | GU151381                 |
| 9092              | Drephalys Burns01 | Pyrginae         | 06-SRNP-42501       | MHAHI602-06           | GU155932                 |
| 9093              | Drephalys Burns01 | Pyrginae         | 07-SRNP-41814       | MHAHL191-07           | JF762087                 |
| 9094              | Drephalys Burns01 | Pyrginae         | 08-SRNP-345         | MHMXT148-08           | JF762088                 |
| 9095              | Drephalys Burns01 | Pyrginae         | 08-SRNP-41486       | MHMXX465-09           | JF777861                 |
| 9096              | Drephalys Burns01 | Pyrginae         | 08-SRNP-71839       | MHMXX466-09           | JF777862                 |
| 9097              | Drephalys kidonoi | Pyrginae         | 06-SRNP-60166       | MHAHK223-07           | JF760661                 |
| 9098              | Drephalys kidonoi | Pyrginae         | 02-SRNP-12965       | MHAHI349-06           | GU155942                 |
| 9099              | Drephalys kidonoi | Pyrginae         | 02-SRNP-12979       | MHAHI342-06           | GU155935                 |
| 9100              | Drephalys kidonoi | Pyrginae         | 02-SRNP-13368       | MHAHI341-06           | GU155934                 |
| 9101              | Drephalys kidonoi | Pyrginae         | 02-SRNP-10261       | MHAHI345-06           | GU155938                 |
| 9102              | Drephalys kidonoi | Pyrginae         | 02-SRNP-13429       | MHAHI350-06           | GU155943                 |
| 9103              | Drephalys kidonoi | Pyrginae         | 02-SRNP-12978       | MHAHI348-06           | GU155941                 |
| 9104              | Drephalys kidonoi | Pyrginae         | 02-SRNP-10329       | MHAHI347-06           | GU155940                 |
| 9105              | Drephalys kidonoi | Pyrginae         | 02-SRNP-10250       | MHAHI346-06           | GU155939                 |
| 9106              | Drephalys kidonoi | Pyrginae         | 02-SRNP-13369       | MHAHI344-06           | GU155937                 |
| 9107              | Drephalys kidonoi | Pyrginae         | 02-SRNP-10252       | MHAHI343-06           | GU155936                 |
| 9108              | Drephalys kidonoi | Pyrginae         | 02-SRNP-13103       | MHAHI340-06           | GU155933                 |
| 9109              | Drephalys kidonoi | Pyrginae         | 01-SRNP-12341       | CSRII114-04           | DQ292289                 |
| 9110              | Drephalys kidonoi | Pyrginae         | 02-SRNP-13370       | CSRII115-04           | DQ292290                 |
| 9111              | Drephalys kidonoi | Pyrginae         | 06-SRNP-60079       | MHAHK221-07           | JF760660                 |
| 9112              | Drephalys kidonoi | Pyrginae         | 07-SRNP-55278       | MHMXX132-07           | JF762090                 |
| 9113              | Drephalys kidonoi | Pyrginae         | 09-SRNP-55224       | MHMYE896-09           | GU653706                 |
| 9114              | Drephalys kidonoi | Pyrginae         | 09-SRNP-55518       | MHMYE1468-09          | GU653534                 |
| 9115              | Cogia hiska       | Pyrginae         | 03-SRNP-250         | CSCR353-04            | DQ292219                 |
| 9116              | Cogia hiska       | Pyrginae         | 03-SRNP-101         | CSCR354-04            | DQ292220                 |
| 9117              | Cogia hiska       | Pyrginae         | 06-SRNP-12193       | MHAHG671-06           | GU151318                 |
| 9118              | Cogia hiska       | Pyrginae         | 03-SRNP-18          | MHAHK520-07           | JF760589                 |
| 9119              | Cogia hiska       | Pyrginae         | 03-SRNP-14096       | MHAHK521-07           | JF760590                 |
| 9120              | Cogia hiska       | Pyrginae         | 03-SRNP-13714       | MHAHK522-07           | JF760591                 |
| 9121              | Cogia hiska       | Pyrginae         | 02-SRNP-12905       | MHAHK523-07           | JF760592                 |
| 9122              | Cogia hiska       | Pyrginae         | 02-SRNP-13343       | MHAHK524-07           | JF760593                 |
| 9123              | Cogia hiska       | Pyrginae         | 02-SRNP-13341       | MHAHK525-07           | JF760594                 |
| 9124              | Cogia hiska       | Pyrginae         | 02-SRNP-13338       | MHAHK526-07           | JF760595                 |
| 9125              | Cogia hiska       | Pyrginae         | 02-SRNP-13244       | MHAHK527-07           | JF760596                 |
| 9126              | Cogia hiska       | Pyrginae         | 02-SRNP-12906       | MHAHK528-07           | JF760597                 |
| 9127              | Cogia hiska       | Pyrginae         | 02-SRNP-13604       | MHAHK529-07           | JF760598                 |

| <b>Tree Order</b> | <b>Species</b>              | <b>Subfamily</b> | <b>ACG Sampleid</b> | <b>BOLD Processid</b> | <b>Genbank Accession</b> |
|-------------------|-----------------------------|------------------|---------------------|-----------------------|--------------------------|
| 9128              | <i>Cogia hiska</i>          | Pyrginae         | 02-SRNP-13580       | MHAHK530-07           | JF760599                 |
| 9129              | <i>Cogia hiska</i>          | Pyrginae         | 02-SRNP-13357       | MHAHK531-07           | JF760600                 |
| 9130              | <i>Cogia hiska</i>          | Pyrginae         | 02-SRNP-13348       | MHAHK532-07           | JF760601                 |
| 9131              | <i>Cogia hiska</i>          | Pyrginae         | 02-SRNP-13346       | MHAHK533-07           | JF760602                 |
| 9132              | <i>Typhedanus undulatus</i> | Pyrginae         | 05-SRNP-5907        | MHAHF352-06           | GU150942                 |
| 9133              | <i>Typhedanus undulatus</i> | Pyrginae         | 05-SRNP-7507        | MHAHF596-06           | GU150941                 |
| 9134              | <i>Typhedanus undulatus</i> | Pyrginae         | 05-SRNP-5906        | MHAHF597-06           | GU150940                 |
| 9135              | <i>Typhedanus undulatus</i> | Pyrginae         | 99-SRNP-12788       | CSCR271-04            | DQ293623                 |
| 9136              | <i>Typhedanus undulatus</i> | Pyrginae         | 98-SRNP-6246        | CSCR270-04            | DQ293622                 |
| 9137              | <i>Typhedanus undulatus</i> | Pyrginae         | 04-SRNP-24403       | MHAHD874-05           | GU161914                 |
| 9138              | <i>Typhedanus undulatus</i> | Pyrginae         | 06-SRNP-21153       | MHAHH556-06           | GU155677                 |
| 9139              | <i>Typhedanus undulatus</i> | Pyrginae         | 07-SRNP-41835       | MHAHL464-07           | JF763279                 |
| 9140              | <i>Typhedanus undulatus</i> | Pyrginae         | 07-SRNP-3071        | MHMXX0824-08          | JF763281                 |
| 9141              | <i>Typhedanus undulatus</i> | Pyrginae         | 07-SRNP-23877       | MHMXR828-08           | JF763280                 |
| 9142              | <i>Cogia calchasDHHJ01</i>  | Pyrginae         | 05-SRNP-12001       | MHAHE078-05           | GU149554                 |
| 9143              | <i>Cogia calchasDHHJ01</i>  | Pyrginae         | 04-SRNP-49737       | MHAHL101-07           | JF761975                 |
| 9144              | <i>Cogia calchasDHHJ01</i>  | Pyrginae         | 07-SRNP-55314       | MHMXX056-07           | JF761977                 |
| 9145              | <i>Cogia calchasDHHJ01</i>  | Pyrginae         | 98-SRNP-6237        | MHAHK536-07           | JF760580                 |
| 9146              | <i>Cogia calchasDHHJ01</i>  | Pyrginae         | 93-SRNP-6683        | MHAHK535-07           | JF760579                 |
| 9147              | <i>Cogia calchasDHHJ01</i>  | Pyrginae         | 06-SRNP-13361       | MHAHH471-06           | GU155337                 |
| 9148              | <i>Cogia calchasDHHJ01</i>  | Pyrginae         | 04-SRNP-48664       | MHAHE077-05           | GU149553                 |
| 9149              | <i>Cogia calchasDHHJ01</i>  | Pyrginae         | 97-SRNP-379         | CSCR076-04            | DQ292214                 |
| 9150              | <i>Cogia calchasDHHJ01</i>  | Pyrginae         | 07-SRNP-45272       | MHMXP125-08           | JF761976                 |
| 9151              | <i>Cogia calchasDHHJ01</i>  | Pyrginae         | 03-SRNP-31305       | MHAHK539-07           | JF760583                 |
| 9152              | <i>Cogia calchasDHHJ01</i>  | Pyrginae         | 98-SRNP-6173        | MHAHK538-07           | JF760582                 |
| 9153              | <i>Cogia calchasDHHJ01</i>  | Pyrginae         | 98-SRNP-6178        | MHAHK537-07           | JF760581                 |
| 9154              | <i>Cogia calchasDHHJ01</i>  | Pyrginae         | 06-SRNP-13417       | MHAHH472-06           | GU155338                 |
| 9155              | <i>Cogia calchasDHHJ01</i>  | Pyrginae         | 05-SRNP-31856       | MHAHF864-06           | GU150340                 |
| 9156              | <i>Cogia calchasDHHJ01</i>  | Pyrginae         | 03-SRNP-6772        | MHAHK540-07           | JF760584                 |
| 9157              | <i>Cogia calchasDHHJ01</i>  | Pyrginae         | 97-SRNP-296         | MHAHK541-07           | JF760585                 |
| 9158              | <i>Cogia calchasDHHJ01</i>  | Pyrginae         | 98-SRNP-6163        | MHAHK542-07           | JF760586                 |
| 9159              | <i>Cogia calchasDHHJ01</i>  | Pyrginae         | 08-SRNP-2425        | MHMXX978-09           | JF777792                 |
| 9160              | <i>Cogia calchasDHHJ01</i>  | Pyrginae         | 08-SRNP-2467        | MHMXX979-09           | JF777793                 |
| 9161              | <i>Cogia calchasDHHJ01</i>  | Pyrginae         | 09-SRNP-80678       | MHMYG1990-10          | JF751926                 |
| 9162              | <i>Cogia calchasDHHJ02</i>  | Pyrginae         | 05-SRNP-32463       | MHAHF865-06           | GU150341                 |
| 9163              | <i>Cogia calchasDHHJ02</i>  | Pyrginae         | 04-SRNP-55362       | MHAHE076-05           | GU149555                 |
| 9164              | <i>Cogia calchasDHHJ02</i>  | Pyrginae         | 05-SRNP-32462       | MHAHF866-06           | GU150342                 |
| 9165              | <i>Cogia calchasDHHJ02</i>  | Pyrginae         | 00-SRNP-21991       | MHAHK534-07           | JF760587                 |
| 9166              | <i>Cogia calchasDHHJ02</i>  | Pyrginae         | 09-SRNP-73335       | MHMYG2447-10          | HM885872                 |
| 9167              | <i>Cogia calchasDHHJ02</i>  | Pyrginae         | 09-SRNP-73332       | MHMYG2448-10          | HM885873                 |
| 9168              | <i>Cogia calchasDHHJ02</i>  | Pyrginae         | 09-SRNP-80699       | MHMYG1991-10          | JF751927                 |
| 9169              | <i>Udranomia orcinus</i>    | Pyrginae         | 04-SRNP-41230       | MHAHD339-05           | GU161929                 |
| 9170              | <i>Udranomia orcinus</i>    | Pyrginae         | 05-SRNP-2555        | MHAHF318-06           | GU150956                 |
| 9171              | <i>Udranomia orcinus</i>    | Pyrginae         | 04-SRNP-30933       | MHAHD340-05           | GU161927                 |
| 9172              | <i>Udranomia orcinus</i>    | Pyrginae         | 04-SRNP-31229       | MHAHD341-05           | GU161926                 |
| 9173              | <i>Udranomia orcinus</i>    | Pyrginae         | 03-SRNP-5582        | CSCR438-04            | DQ293629                 |
| 9174              | <i>Udranomia orcinus</i>    | Pyrginae         | 05-SRNP-1457        | MHAHF317-06           | GU150952                 |
| 9175              | <i>Udranomia orcinus</i>    | Pyrginae         | 07-SRNP-40320       | MHAHK376-07           | JF761259                 |
| 9176              | <i>Udranomia orcinus</i>    | Pyrginae         | 08-SRNP-1673        | MHMXX405-09           | JF754347                 |
| 9177              | <i>Udranomia orcinus</i>    | Pyrginae         | 05-SRNP-21131       | MHAHF314-06           | GU150953                 |
| 9178              | <i>Udranomia orcinus</i>    | Pyrginae         | 08-SRNP-22893       | MHMXX541-09           | JF778575                 |
| 9179              | <i>Udranomia orcinus</i>    | Pyrginae         | 08-SRNP-41217       | MHMXX536-09           | JF778574                 |
| 9180              | <i>Udranomia orcinus</i>    | Pyrginae         | 07-SRNP-20955       | MHMXX150-09           | GU666370                 |
| 9181              | <i>Udranomia orcinus</i>    | Pyrginae         | 08-SRNP-31332       | MHMXX419-09           | JF754353                 |
| 9182              | <i>Udranomia orcinus</i>    | Pyrginae         | 08-SRNP-40514       | MHMXX413-09           | JF754351                 |
| 9183              | <i>Udranomia orcinus</i>    | Pyrginae         | 08-SRNP-1672        | MHMXX410-09           | JF754350                 |

| <b>Tree Order</b> | <b>Species</b>          | <b>Subfamily</b> | <b>ACG Sampleid</b> | <b>BOLD Processid</b> | <b>Genbank Accession</b> |
|-------------------|-------------------------|------------------|---------------------|-----------------------|--------------------------|
| 9184              | Udranomia orcinus       | Pyrginae         | 08-SRNP-20817       | MHMXW409-09           | JF754349                 |
| 9185              | Udranomia orcinus       | Pyrginae         | 08-SRNP-20850       | MHMXW408-09           | JF754348                 |
| 9186              | Udranomia orcinus       | Pyrginae         | 08-SRNP-818         | MHMXW404-09           | JF754346                 |
| 9187              | Udranomia orcinus       | Pyrginae         | 08-SRNP-30988       | MHMXW401-09           | JF754345                 |
| 9188              | Udranomia orcinus       | Pyrginae         | 07-SRNP-65382       | MHMXR933-08           | JF763295                 |
| 9189              | Udranomia orcinus       | Pyrginae         | 07-SRNP-40260       | MHAKH369-07           | JF761258                 |
| 9190              | Udranomia orcinus       | Pyrginae         | 07-SRNP-1287        | MHAKH368-07           | JF761257                 |
| 9191              | Udranomia orcinus       | Pyrginae         | 06-SRNP-23065       | MHAHJ459-07           | JF753212                 |
| 9192              | Udranomia orcinus       | Pyrginae         | 04-SRNP-31004       | MHAHD342-05           | GU161925                 |
| 9193              | Udranomia orcinus       | Pyrginae         | 04-SRNP-42858       | MHAHD323-05           | GU161928                 |
| 9194              | Udranomia orcinus       | Pyrginae         | 07-SRNP-40862       | MHMXN429-07           | JF763296                 |
| 9195              | Udranomia orcinus       | Pyrginae         | 06-SRNP-41751       | MHAHH797-06           | GU155696                 |
| 9196              | Udranomia orcinus       | Pyrginae         | 05-SRNP-31979       | MHAHF316-06           | GU150954                 |
| 9197              | Udranomia orcinus       | Pyrginae         | 03-SRNP-10433       | CSCR437-04            | DQ293628                 |
| 9198              | Udranomia orcinus       | Pyrginae         | 05-SRNP-8128        | MHAHI606-06           | GU156379                 |
| 9199              | Udranomia orcinus       | Pyrginae         | 05-SRNP-41043       | MHAHF315-06           | GU150955                 |
| 9200              | Udranomia orcinus       | Pyrginae         | 05-SRNP-8135        | MHAHG349-06           | GU151801                 |
| 9201              | Udranomia orcinus       | Pyrginae         | 07-SRNP-24023       | MHMXR934-08           | JF763294                 |
| 9202              | Udranomia orcinus       | Pyrginae         | 08-SRNP-70812       | MHMXW418-09           | JF754352                 |
| 9203              | Udranomia orcinus       | Pyrginae         | 08-SRNP-66180       | MHMYX982-09           | GU666539                 |
| 9204              | Udranomia orcinus       | Pyrginae         | 09-SRNP-67117       | MHMYC509-09           | GU649828                 |
| 9205              | Udranomia orcinus       | Pyrginae         | 09-SRNP-69354       | MHMYE1564-09          | HM391124                 |
| 9206              | Udranomia orcinus       | Pyrginae         | 09-SRNP-80703       | MHMYH125-10           | HM887277                 |
| 9207              | Udranomia eurus         | Pyrginae         | 03-SRNP-11250       | CSCR433-04            | DQ293624                 |
| 9208              | Udranomia kikkawaiDHJ03 | Pyrginae         | 08-SRNP-21971       | MHMXX538-09           | JF778572                 |
| 9209              | Udranomia kikkawaiDHJ03 | Pyrginae         | 08-SRNP-21969       | MHMXX540-09           | JF778573                 |
| 9210              | Udranomia kikkawaiDHJ03 | Pyrginae         | 96-SRNP-1042        | MHAHG858-06           | GU151800                 |
| 9211              | Udranomia kikkawaiDHJ03 | Pyrginae         | 06-SRNP-55723       | MHAHH795-06           | GU155695                 |
| 9212              | Udranomia kikkawaiDHJ03 | Pyrginae         | 07-SRNP-55337       | MHAKH379-07           | JF761253                 |
| 9213              | Udranomia kikkawaiDHJ03 | Pyrginae         | 07-SRNP-55336       | MHAKH377-07           | JF761252                 |
| 9214              | Udranomia kikkawaiDHJ03 | Pyrginae         | 08-SRNP-21281       | MHMXW396-09           | JF754341                 |
| 9215              | Udranomia kikkawaiDHJ03 | Pyrginae         | 07-SRNP-56346       | MHAKH394-07           | JF761256                 |
| 9216              | Udranomia kikkawaiDHJ03 | Pyrginae         | 07-SRNP-56440       | MHAKH392-07           | JF761255                 |
| 9217              | Udranomia kikkawaiDHJ03 | Pyrginae         | 07-SRNP-56118       | MHAKH372-07           | JF761250                 |
| 9218              | Udranomia kikkawaiDHJ03 | Pyrginae         | 07-SRNP-55138       | MHMXH873-07           | JF761249                 |
| 9219              | Udranomia kikkawaiDHJ03 | Pyrginae         | 01-SRNP-9758        | MHAHG847-06           | GU151798                 |
| 9220              | Udranomia kikkawaiDHJ03 | Pyrginae         | 01-SRNP-24435       | MHAHG845-06           | GU151796                 |
| 9221              | Udranomia kikkawaiDHJ03 | Pyrginae         | 02-SRNP-11244       | MHAHG841-06           | GU151797                 |
| 9222              | Udranomia kikkawaiDHJ03 | Pyrginae         | 02-SRNP-11245       | MHAHG839-06           | GU151795                 |
| 9223              | Udranomia kikkawaiDHJ03 | Pyrginae         | 00-SRNP-2831        | MHAHG848-06           | GU151799                 |
| 9224              | Udranomia kikkawaiDHJ03 | Pyrginae         | 01-SRNP-17596       | MHAHG831-06           | GU151793                 |
| 9225              | Udranomia kikkawaiDHJ03 | Pyrginae         | 07-SRNP-55917       | MHAKH386-07           | JF761254                 |
| 9226              | Udranomia kikkawaiDHJ03 | Pyrginae         | 02-SRNP-32867       | MHAHG837-06           | GU151794                 |
| 9227              | Udranomia kikkawaiDHJ03 | Pyrginae         | 07-SRNP-56117       | MHAKH374-07           | JF761251                 |
| 9228              | Udranomia kikkawaiDHJ03 | Pyrginae         | 07-SRNP-20950       | MHMXN424-07           | JF763293                 |
| 9229              | Udranomia kikkawaiDHJ03 | Pyrginae         | 07-SRNP-23337       | MHMXR937-08           | JF763292                 |
| 9230              | Udranomia kikkawaiDHJ03 | Pyrginae         | 07-SRNP-23338       | MHMXR938-08           | JF763291                 |
| 9231              | Udranomia kikkawaiDHJ03 | Pyrginae         | 08-SRNP-56040       | MHMXW392-09           | JF754340                 |
| 9232              | Udranomia kikkawaiDHJ03 | Pyrginae         | 08-SRNP-20600       | MHMXW400-09           | JF754342                 |
| 9233              | Udranomia kikkawaiDHJ03 | Pyrginae         | 08-SRNP-20931       | MHMXW406-09           | JF754343                 |
| 9234              | Udranomia kikkawaiDHJ03 | Pyrginae         | 08-SRNP-21219       | MHMXW417-09           | JF754344                 |
| 9235              | Udranomia kikkawaiDHJ03 | Pyrginae         | 08-SRNP-21967       | MHMXX534-09           | JF778570                 |
| 9236              | Udranomia kikkawaiDHJ03 | Pyrginae         | 08-SRNP-21965       | MHMXX535-09           | JF778571                 |
| 9237              | Udranomia kikkawaiDHJ03 | Pyrginae         | 08-SRNP-23929       | MHMYX981-09           | GU666546                 |
| 9238              | Udranomia kikkawaiDHJ03 | Pyrginae         | 08-SRNP-16988       | MHMYX986-09           | GU666535                 |
| 9239              | Udranomia kikkawaiDHJ01 | Pyrginae         | 03-SRNP-12017       | MHAHG827-06           | GU151756                 |

| Tree Order | Species                 | Subfamily | ACG Sampleid  | BOLD Processid | Genbank Accession |
|------------|-------------------------|-----------|---------------|----------------|-------------------|
| 9240       | Udranomia kikkawaiDHJ01 | Pyrginae  | 96-SRNP-807   | MHAHG853-06    | GU151769          |
| 9241       | Udranomia kikkawaiDHJ01 | Pyrginae  | 96-SRNP-1053  | MHAHG851-06    | GU151772          |
| 9242       | Udranomia kikkawaiDHJ01 | Pyrginae  | 96-SRNP-1007  | MHAHG857-06    | GU151774          |
| 9243       | Udranomia kikkawaiDHJ01 | Pyrginae  | 00-SRNP-6094  | MHAHG852-06    | GU151770          |
| 9244       | Udranomia kikkawaiDHJ01 | Pyrginae  | 01-SRNP-17593 | MHAHG834-06    | GU151750          |
| 9245       | Udranomia kikkawaiDHJ01 | Pyrginae  | 02-SRNP-4194  | MHAHG836-06    | GU151761          |
| 9246       | Udranomia kikkawaiDHJ01 | Pyrginae  | 02-SRNP-10083 | MHAHG838-06    | GU151758          |
| 9247       | Udranomia kikkawaiDHJ01 | Pyrginae  | 07-SRNP-55350 | MHAHK390-07    | JF761244          |
| 9248       | Udranomia kikkawaiDHJ01 | Pyrginae  | 08-SRNP-21920 | MHMXX726-09    | JF778564          |
| 9249       | Udranomia kikkawaiDHJ01 | Pyrginae  | 07-SRNP-55803 | MHAHK375-07    | JF761233          |
| 9250       | Udranomia kikkawaiDHJ01 | Pyrginae  | 07-SRNP-55804 | MHAHK371-07    | JF761232          |
| 9251       | Udranomia kikkawaiDHJ01 | Pyrginae  | 07-SRNP-55142 | MHMXH872-07    | JF761229          |
| 9252       | Udranomia kikkawaiDHJ01 | Pyrginae  | 06-SRNP-56437 | MHAHI203-06    | GU156376          |
| 9253       | Udranomia kikkawaiDHJ01 | Pyrginae  | 01-SRNP-24380 | MHAHG844-06    | GU151765          |
| 9254       | Udranomia kikkawaiDHJ01 | Pyrginae  | 03-SRNP-966   | MHAHG842-06    | GU151767          |
| 9255       | Udranomia kikkawaiDHJ01 | Pyrginae  | 01-SRNP-17592 | MHAHG829-06    | GU151753          |
| 9256       | Udranomia kikkawaiDHJ01 | Pyrginae  | 06-SRNP-13261 | MHAHH796-06    | GU155679          |
| 9257       | Udranomia kikkawaiDHJ01 | Pyrginae  | 97-SRNP-4074  | MHAHG826-06    | GU151757          |
| 9258       | Udranomia kikkawaiDHJ01 | Pyrginae  | 06-SRNP-13260 | MHAHH812-06    | GU155678          |
| 9259       | Udranomia kikkawaiDHJ01 | Pyrginae  | 96-SRNP-930   | MHAHG860-06    | GU151775          |
| 9260       | Udranomia kikkawaiDHJ01 | Pyrginae  | 07-SRNP-20867 | MHAHK384-07    | JF761239          |
| 9261       | Udranomia kikkawaiDHJ01 | Pyrginae  | 07-SRNP-20972 | MHMXX423-07    | JF763287          |
| 9262       | Udranomia kikkawaiDHJ01 | Pyrginae  | 07-SRNP-23327 | MHMXR935-08    | JF763283          |
| 9263       | Udranomia kikkawaiDHJ01 | Pyrginae  | 08-SRNP-20601 | MHMXX411-09    | JF754331          |
| 9264       | Udranomia kikkawaiDHJ01 | Pyrginae  | 08-SRNP-20596 | MHMXX412-09    | JF754332          |
| 9265       | Udranomia kikkawaiDHJ01 | Pyrginae  | 08-SRNP-21165 | MHMXX416-09    | JF754335          |
| 9266       | Udranomia kikkawaiDHJ01 | Pyrginae  | 08-SRNP-12275 | MHMXX728-09    | JF778566          |
| 9267       | Udranomia kikkawaiDHJ01 | Pyrginae  | 08-SRNP-12197 | MHMXX729-09    | JF778567          |
| 9268       | Udranomia kikkawaiDHJ01 | Pyrginae  | 07-SRNP-55686 | MHAHK388-07    | JF761242          |
| 9269       | Udranomia kikkawaiDHJ01 | Pyrginae  | 07-SRNP-56119 | MHAHK387-07    | JF761241          |
| 9270       | Udranomia kikkawaiDHJ01 | Pyrginae  | 07-SRNP-12122 | MHAHK385-07    | JF761240          |
| 9271       | Udranomia kikkawaiDHJ01 | Pyrginae  | 02-SRNP-14029 | MHAHG832-06    | GU151752          |
| 9272       | Udranomia kikkawaiDHJ01 | Pyrginae  | 08-SRNP-12195 | MHMXX725-09    | JF778563          |
| 9273       | Udranomia kikkawaiDHJ01 | Pyrginae  | 97-SRNP-4069  | MHAHG855-06    | GU151762          |
| 9274       | Udranomia kikkawaiDHJ01 | Pyrginae  | 08-SRNP-16999 | MHMXY987-09    | HM390688          |
| 9275       | Udranomia kikkawaiDHJ01 | Pyrginae  | 08-SRNP-75002 | MHMXY985-09    | GU666542          |
| 9276       | Udranomia kikkawaiDHJ01 | Pyrginae  | 08-SRNP-16997 | MHMXY984-09    | GU666541          |
| 9277       | Udranomia kikkawaiDHJ01 | Pyrginae  | 08-SRNP-12158 | MHMXX727-09    | JF778565          |
| 9278       | Udranomia kikkawaiDHJ01 | Pyrginae  | 08-SRNP-21923 | MHMXX539-09    | JF778562          |
| 9279       | Udranomia kikkawaiDHJ01 | Pyrginae  | 08-SRNP-21924 | MHMXX533-09    | JF778561          |
| 9280       | Udranomia kikkawaiDHJ01 | Pyrginae  | 08-SRNP-21968 | MHMXX532-09    | JF778560          |
| 9281       | Udranomia kikkawaiDHJ01 | Pyrginae  | 08-SRNP-21926 | MHMXX531-09    | JF778559          |
| 9282       | Udranomia kikkawaiDHJ01 | Pyrginae  | 07-SRNP-20946 | MHMXX149-09    | GU666369          |
| 9283       | Udranomia kikkawaiDHJ01 | Pyrginae  | 08-SRNP-55525 | MHMXX1189-09   | JF778568          |
| 9284       | Udranomia kikkawaiDHJ01 | Pyrginae  | 08-SRNP-20481 | MHMXX415-09    | JF754334          |
| 9285       | Udranomia kikkawaiDHJ01 | Pyrginae  | 08-SRNP-20636 | MHMXX414-09    | JF754333          |
| 9286       | Udranomia kikkawaiDHJ01 | Pyrginae  | 08-SRNP-20882 | MHMXX407-09    | JF754330          |
| 9287       | Udranomia kikkawaiDHJ01 | Pyrginae  | 08-SRNP-20635 | MHMXX399-09    | JF754329          |
| 9288       | Udranomia kikkawaiDHJ01 | Pyrginae  | 08-SRNP-45146 | MHMXX394-09    | JF754328          |
| 9289       | Udranomia kikkawaiDHJ01 | Pyrginae  | 07-SRNP-23341 | MHMXX936-08    | JF763282          |
| 9290       | Udranomia kikkawaiDHJ01 | Pyrginae  | 07-SRNP-20956 | MHMXX427-07    | JF763284          |
| 9291       | Udranomia kikkawaiDHJ01 | Pyrginae  | 07-SRNP-20953 | MHMXX425-07    | JF763286          |
| 9292       | Udranomia kikkawaiDHJ01 | Pyrginae  | 07-SRNP-56274 | MHAHK391-07    | JF761245          |
| 9293       | Udranomia kikkawaiDHJ01 | Pyrginae  | 07-SRNP-12359 | MHAHK389-07    | JF761243          |
| 9294       | Udranomia kikkawaiDHJ01 | Pyrginae  | 07-SRNP-12102 | MHAHK383-07    | JF761238          |
| 9295       | Udranomia kikkawaiDHJ01 | Pyrginae  | 07-SRNP-55349 | MHAHK382-07    | JF761237          |

| <b>Tree Order</b> | <b>Species</b>          | <b>Subfamily</b> | <b>ACG Sampleid</b> | <b>BOLD Processid</b> | <b>Genbank Accession</b> |
|-------------------|-------------------------|------------------|---------------------|-----------------------|--------------------------|
| 9296              | Udranomia kikkawaiDHJ01 | Pyrginae         | 07-SRNP-55351       | MHAHK381-07           | JF761236                 |
| 9297              | Udranomia kikkawaiDHJ01 | Pyrginae         | 07-SRNP-12180       | MHAHK378-07           | JF761234                 |
| 9298              | Udranomia kikkawaiDHJ01 | Pyrginae         | 07-SRNP-12127       | MHMXH900-07           | JF761225                 |
| 9299              | Udranomia kikkawaiDHJ01 | Pyrginae         | 07-SRNP-12034       | MHMXH899-07           | JF761226                 |
| 9300              | Udranomia kikkawaiDHJ01 | Pyrginae         | 07-SRNP-12098       | MHMXH897-07           | JF761231                 |
| 9301              | Udranomia kikkawaiDHJ01 | Pyrginae         | 07-SRNP-55263       | MHMXH874-07           | JF761228                 |
| 9302              | Udranomia kikkawaiDHJ01 | Pyrginae         | 06-SRNP-13329       | MHAHH813-06           | GU155681                 |
| 9303              | Udranomia kikkawaiDHJ01 | Pyrginae         | 06-SRNP-56079       | MHAHH798-06           | GU155680                 |
| 9304              | Udranomia kikkawaiDHJ01 | Pyrginae         | 96-SRNP-1155        | MHAHG856-06           | GU151759                 |
| 9305              | Udranomia kikkawaiDHJ01 | Pyrginae         | 96-SRNP-832         | MHAHG854-06           | GU151768                 |
| 9306              | Udranomia kikkawaiDHJ01 | Pyrginae         | 99-SRNP-2706        | MHAHG849-06           | GU151771                 |
| 9307              | Udranomia kikkawaiDHJ01 | Pyrginae         | 01-SRNP-24490       | MHAHG846-06           | GU151763                 |
| 9308              | Udranomia kikkawaiDHJ01 | Pyrginae         | 01-SRNP-24434       | MHAHG843-06           | GU151766                 |
| 9309              | Udranomia kikkawaiDHJ01 | Pyrginae         | 02-SRNP-5956        | MHAHG840-06           | GU151764                 |
| 9310              | Udranomia kikkawaiDHJ01 | Pyrginae         | 01-SRNP-17953       | MHAHG835-06           | GU151760                 |
| 9311              | Udranomia kikkawaiDHJ01 | Pyrginae         | 02-SRNP-4127        | MHAHG833-06           | GU151751                 |
| 9312              | Udranomia kikkawaiDHJ01 | Pyrginae         | 01-SRNP-17591       | MHAHG830-06           | GU151755                 |
| 9313              | Udranomia kikkawaiDHJ01 | Pyrginae         | 03-SRNP-12056       | MHAHG828-06           | GU151754                 |
| 9314              | Udranomia kikkawaiDHJ01 | Pyrginae         | 05-SRNP-45233       | MHAHF531-06           | GU150944                 |
| 9315              | Udranomia kikkawaiDHJ01 | Pyrginae         | 05-SRNP-45219       | MHAHF530-06           | GU150943                 |
| 9316              | Udranomia kikkawaiDHJ01 | Pyrginae         | 04-SRNP-45504       | MHAHD334-05           | GU161917                 |
| 9317              | Udranomia kikkawaiDHJ01 | Pyrginae         | 04-SRNP-16075       | MHAHD333-05           | GU161915                 |
| 9318              | Udranomia kikkawaiDHJ01 | Pyrginae         | 04-SRNP-45505       | MHAHD332-05           | GU161919                 |
| 9319              | Udranomia kikkawaiDHJ01 | Pyrginae         | 07-SRNP-20954       | MHMXN426-07           | JF763285                 |
| 9320              | Udranomia kikkawaiDHJ01 | Pyrginae         | 05-SRNP-12029       | MHAHD330-05           | GU161916                 |
| 9321              | Udranomia kikkawaiDHJ01 | Pyrginae         | 04-SRNP-45599       | MHAHD328-05           | GU161918                 |
| 9322              | Udranomia kikkawaiDHJ01 | Pyrginae         | 07-SRNP-12099       | MHMXH898-07           | JF761227                 |
| 9323              | Udranomia kikkawaiDHJ01 | Pyrginae         | 07-SRNP-12101       | MHMXI576-07           | JF761230                 |
| 9324              | Udranomia kikkawaiDHJ01 | Pyrginae         | 07-SRNP-56275       | MHAHK393-07           | JF761246                 |
| 9325              | Udranomia kikkawaiDHJ01 | Pyrginae         | 07-SRNP-55265       | MHAHK380-07           | JF761235                 |
| 9326              | Udranomia kikkawaiDHJ01 | Pyrginae         | 07-SRNP-20952       | MHMXN422-07           | JF763288                 |
| 9327              | Udranomia kikkawaiDHJ01 | Pyrginae         | 08-SRNP-75004       | MHMXY983-09           | GU666540                 |
| 9328              | Udranomia kikkawaiDHJ01 | Pyrginae         | 09-SRNP-12113       | MHMXY988-09           | GU666536                 |
| 9329              | Udranomia kikkawaiDHJ01 | Pyrginae         | 08-SRNP-16994       | MHMXY989-09           | GU666537                 |
| 9330              | Udranomia kikkawaiDHJ01 | Pyrginae         | 09-SRNP-20996       | MHMYH127-10           | HM887278                 |
| 9331              | Udranomia kikkawaiDHJ02 | Pyrginae         | 96-SRNP-1054        | MHAHG859-06           | GU151781                 |
| 9332              | Udranomia kikkawaiDHJ02 | Pyrginae         | 05-SRNP-41045       | MHAHF526-06           | GU150948                 |
| 9333              | Udranomia kikkawaiDHJ02 | Pyrginae         | 04-SRNP-30985       | MHAHD329-05           | GU161921                 |
| 9334              | Udranomia kikkawaiDHJ02 | Pyrginae         | 05-SRNP-21026       | MHAHF528-06           | GU150946                 |
| 9335              | Udranomia kikkawaiDHJ02 | Pyrginae         | 01-SRNP-22738       | MHAHG864-06           | GU151782                 |
| 9336              | Udranomia kikkawaiDHJ02 | Pyrginae         | 03-SRNP-10461       | MHAHG870-06           | GU151788                 |
| 9337              | Udranomia kikkawaiDHJ02 | Pyrginae         | 05-SRNP-40465       | MHAHF532-06           | GU150945                 |
| 9338              | Udranomia kikkawaiDHJ02 | Pyrginae         | 06-SRNP-3255        | MHAHG744-06           | GU151778                 |
| 9339              | Udranomia kikkawaiDHJ02 | Pyrginae         | 03-SRNP-10577       | CSCR435-04            | DQ293626                 |
| 9340              | Udranomia kikkawaiDHJ02 | Pyrginae         | 04-SRNP-40828       | MHAHD322-05           | GU161922                 |
| 9341              | Udranomia kikkawaiDHJ02 | Pyrginae         | 08-SRNP-31128       | MHMXW398-09           | JF754339                 |
| 9342              | Udranomia kikkawaiDHJ02 | Pyrginae         | 08-SRNP-21090       | MHMXW397-09           | JF754338                 |
| 9343              | Udranomia kikkawaiDHJ02 | Pyrginae         | 08-SRNP-70104       | MHMXW395-09           | JF754337                 |
| 9344              | Udranomia kikkawaiDHJ02 | Pyrginae         | 07-SRNP-40724       | MHAHK370-07           | JF761247                 |
| 9345              | Udranomia kikkawaiDHJ02 | Pyrginae         | 06-SRNP-23003       | MHAHJ460-07           | JF753211                 |
| 9346              | Udranomia kikkawaiDHJ02 | Pyrginae         | 06-SRNP-41739       | MHAHH803-06           | GU155688                 |
| 9347              | Udranomia kikkawaiDHJ02 | Pyrginae         | 06-SRNP-41738       | MHAHH800-06           | GU155684                 |
| 9348              | Udranomia kikkawaiDHJ02 | Pyrginae         | 06-SRNP-41442       | MHAHH799-06           | GU155685                 |
| 9349              | Udranomia kikkawaiDHJ02 | Pyrginae         | 03-SRNP-10604       | MHAHG872-06           | GU151791                 |
| 9350              | Udranomia kikkawaiDHJ02 | Pyrginae         | 03-SRNP-10392       | MHAHG871-06           | GU151792                 |
| 9351              | Udranomia kikkawaiDHJ02 | Pyrginae         | 03-SRNP-10390       | MHAHG869-06           | GU151789                 |

| <b>Tree Order</b> | <b>Species</b>          | <b>Subfamily</b> | <b>ACG Sampleid</b> | <b>BOLD Processid</b> | <b>Genbank Accession</b> |
|-------------------|-------------------------|------------------|---------------------|-----------------------|--------------------------|
| 9352              | Udranomia kikkawaiDHJ02 | Pyrginae         | 03-SRNP-11383       | MHAHG868-06           | GU151790                 |
| 9353              | Udranomia kikkawaiDHJ02 | Pyrginae         | 02-SRNP-21390       | MHAHG867-06           | GU151786                 |
| 9354              | Udranomia kikkawaiDHJ02 | Pyrginae         | 03-SRNP-10391       | MHAHG865-06           | GU151780                 |
| 9355              | Udranomia kikkawaiDHJ02 | Pyrginae         | 02-SRNP-2617        | MHAHG863-06           | GU151783                 |
| 9356              | Udranomia kikkawaiDHJ02 | Pyrginae         | 02-SRNP-6916        | MHAHG862-06           | GU151784                 |
| 9357              | Udranomia kikkawaiDHJ02 | Pyrginae         | 06-SRNP-3420        | MHAHG747-06           | GU151779                 |
| 9358              | Udranomia kikkawaiDHJ02 | Pyrginae         | 06-SRNP-3422        | MHAHG746-06           | GU151776                 |
| 9359              | Udranomia kikkawaiDHJ02 | Pyrginae         | 05-SRNP-31041       | MHAHF525-06           | GU150947                 |
| 9360              | Udranomia kikkawaiDHJ02 | Pyrginae         | 05-SRNP-21024       | MHAHF524-06           | GU150949                 |
| 9361              | Udranomia kikkawaiDHJ02 | Pyrginae         | 04-SRNP-31720       | MHAHD335-05           | GU161920                 |
| 9362              | Udranomia kikkawaiDHJ02 | Pyrginae         | 04-SRNP-41255       | MHAHD331-05           | GU161924                 |
| 9363              | Udranomia kikkawaiDHJ02 | Pyrginae         | 04-SRNP-2413        | MHAHD327-05           | GU161923                 |
| 9364              | Udranomia kikkawaiDHJ02 | Pyrginae         | 06-SRNP-41737       | MHAHH810-06           | GU155693                 |
| 9365              | Udranomia kikkawaiDHJ02 | Pyrginae         | 06-SRNP-41741       | MHAHH806-06           | GU155690                 |
| 9366              | Udranomia kikkawaiDHJ02 | Pyrginae         | 06-SRNP-3253        | MHAHG745-06           | GU151777                 |
| 9367              | Udranomia kikkawaiDHJ02 | Pyrginae         | 06-SRNP-32415       | MHAHI202-06           | GU156378                 |
| 9368              | Udranomia kikkawaiDHJ02 | Pyrginae         | 06-SRNP-34647       | MHAHI580-06           | GU156377                 |
| 9369              | Udranomia kikkawaiDHJ02 | Pyrginae         | 07-SRNP-40376       | MHAHK373-07           | JF761248                 |
| 9370              | Udranomia kikkawaiDHJ02 | Pyrginae         | 08-SRNP-40430       | MHMXT123-08           | JF763290                 |
| 9371              | Udranomia kikkawaiDHJ02 | Pyrginae         | 08-SRNP-65801       | MHMXY990-09           | GU666538                 |
| 9372              | Udranomia kikkawaiDHJ02 | Pyrginae         | 08-SRNP-41215       | MHMXX537-09           | JF778569                 |
| 9373              | Udranomia kikkawaiDHJ02 | Pyrginae         | 08-SRNP-32449       | MHMXY980-09           | GU666545                 |
| 9374              | Udranomia kikkawaiDHJ02 | Pyrginae         | 03-SRNP-10011       | CSCR436-04            | DQ293627                 |
| 9375              | Udranomia kikkawaiDHJ02 | Pyrginae         | 06-SRNP-41523       | MHAHH801-06           | GU155686                 |
| 9376              | Udranomia kikkawaiDHJ02 | Pyrginae         | 09-SRNP-69425       | MHMYE1562-09          | HM391122                 |
| 9377              | Udranomia kikkawaiDHJ02 | Pyrginae         | 06-SRNP-3714        | MHAHH805-06           | GU155689                 |
| 9378              | Udranomia kikkawaiDHJ02 | Pyrginae         | 06-SRNP-3715        | MHAHH807-06           | GU155691                 |
| 9379              | Udranomia kikkawaiDHJ02 | Pyrginae         | 06-SRNP-32537       | MHAHH809-06           | GU155692                 |
| 9380              | Udranomia kikkawaiDHJ02 | Pyrginae         | 03-SRNP-10389       | CSCR434-04            | DQ293625                 |
| 9381              | Udranomia kikkawaiDHJ02 | Pyrginae         | 05-SRNP-31092       | MHAHF523-06           | GU150951                 |
| 9382              | Udranomia kikkawaiDHJ02 | Pyrginae         | 06-SRNP-31634       | MHAHH804-06           | GU155682                 |
| 9383              | Udranomia kikkawaiDHJ02 | Pyrginae         | 08-SRNP-40400       | MHMXT124-08           | JF763289                 |
| 9384              | Udranomia kikkawaiDHJ02 | Pyrginae         | 08-SRNP-71686       | MHMWX393-09           | JF754336                 |
| 9385              | Udranomia kikkawaiDHJ02 | Pyrginae         | 09-SRNP-69506       | MHMYE1560-09          | HM391120                 |
| 9386              | Udranomia kikkawaiDHJ02 | Pyrginae         | 09-SRNP-69421       | MHMYE1561-09          | HM391121                 |
| 9387              | Udranomia kikkawaiDHJ02 | Pyrginae         | 09-SRNP-69505       | MHMYE1563-09          | HM391123                 |
| 9388              | Udranomia kikkawaiDHJ02 | Pyrginae         | 09-SRNP-41711       | MHMYH128-10           | HM887279                 |
| 9389              | Udranomia kikkawaiDHJ02 | Pyrginae         | 02-SRNP-19637       | MHAHG861-06           | GU151785                 |
| 9390              | Udranomia kikkawaiDHJ02 | Pyrginae         | 06-SRNP-41526       | MHAHH802-06           | GU155687                 |
| 9391              | Udranomia kikkawaiDHJ02 | Pyrginae         | 05-SRNP-31080       | MHAHF529-06           | GU150950                 |
| 9392              | Udranomia kikkawaiDHJ02 | Pyrginae         | 03-SRNP-5785        | MHAHG866-06           | GU151787                 |
| 9393              | Udranomia kikkawaiDHJ02 | Pyrginae         | 06-SRNP-41524       | MHAHH811-06           | GU155694                 |
| 9394              | Udranomia kikkawaiDHJ02 | Pyrginae         | 09-SRNP-42041       | MHMYH129-10           | HM887280                 |
